# Supplementary material for: Pentaborate(1-) Salts and a Tetraborate(2-) Salt Derived from C2- or C3-Linked Bis(alkylammonium) Dications: Synthesis, Characterization, and Structural (XRD) Studies
Source: Molecules. 2019 Dec 23;25(1):53. doi: 10.3390/molecules25010053 (PMC6982793; doi:10.3390/molecules25010053)

# checkCIF/PLATON report

Structure factors have been supplied for datablock(s) MAB2

THIS REPORT IS FOR GUIDANCE ONLY. IF USED AS PART OF A REVIEW PROCEDURE FOR PUBLICATION, IT SHOULD NOT REPLACE THE EXPERTISE OF AN EXPERIENCED CRYSTALLOGRAPHIC REFEREE.

No syntax errors found.      CIF dictionary      Interpreting this report

## Datablock: MAB2

---

Bond precision:    O- B = 0.0043 A                      Wavelength=0.71075

Cell:                      a=8.3998(5)                      b=9.1406(7)                      c=18.2066(13)  
                                    alpha=78.439(6)                      beta=86.810(5)                      gamma=88.118(6)  
Temperature:    100 K

|                | Calculated               | Reported                  |
|----------------|--------------------------|---------------------------|
| Volume         | 1367.07(17)              | 1367.07(17)               |
| Space group    | P -1                     | P -1                      |
| Hall group     | -P 1                     | -P 1                      |
| Moiety formula | 2(B5 H4 O10), C10 H26 N2 | 2(B5 H4 O10), 2(C5 H13 N) |
| Sum formula    | C10 H34 B10 N2 O20       | C10 H34 B10 N2 O20        |
| Mr             | 610.49                   | 610.49                    |
| Dx,g cm-3      | 1.483                    | 1.483                     |
| Z              | 2                        | 2                         |
| Mu (mm-1)      | 0.130                    | 0.130                     |
| F000           | 636.0                    | 636.0                     |
| F000'          | 636.45                   |                           |
| h,k,lmax       | 10,11,23                 | 10,11,23                  |
| Nref           | 6265                     | 6146                      |
| Tmin,Tmax      | 0.994,0.999              | 0.727,1.000               |
| Tmin'          | 0.987                    |                           |

Correction method= # Reported T Limits: Tmin=0.727 Tmax=1.000  
AbsCorr = MULTI-SCAN

Data completeness= 0.981                      Theta(max)= 27.486

R(reflections)= 0.0748( 2997)                      wR2(reflections)= 0.1850( 6146)

S = 1.005                      Npar= 561

---

The following ALERTS were generated. Each ALERT has the format  
**test-name\_ALERT\_alert-type\_alert-level.**  
Click on the hyperlinks for more details of the test.

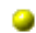

### Alert level C

|                   |                                                  |        |        |
|-------------------|--------------------------------------------------|--------|--------|
| PLAT026_ALERT_3_C | Ratio Observed / Unique Reflections (too) Low .. | 49%    | Check  |
| PLAT250_ALERT_2_C | Large U3/U1 Ratio for Average U(i,j) Tensor .... | 2.7    | Note   |
| PLAT250_ALERT_2_C | Large U3/U1 Ratio for Average U(i,j) Tensor .... | 2.7    | Note   |
| PLAT250_ALERT_2_C | Large U3/U1 Ratio for Average U(i,j) Tensor .... | 2.7    | Note   |
| PLAT430_ALERT_2_C | Short Inter D...A Contact O2 ..015 .             | 2.87   | Ang.   |
|                   | x,y,z =                                          | 1_555  | Check  |
| PLAT906_ALERT_3_C | Large K Value in the Analysis of Variance .....  | 14.957 | Check  |
| PLAT906_ALERT_3_C | Large K Value in the Analysis of Variance .....  | 3.420  | Check  |
| PLAT911_ALERT_3_C | Missing FCF Refl Between Thmin & STh/L= 0.600    | 77     | Report |

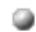

### Alert level G

|                   |                                                  |        |        |
|-------------------|--------------------------------------------------|--------|--------|
| PLAT002_ALERT_2_G | Number of Distance or Angle Restraints on AtSite | 30     | Note   |
| PLAT003_ALERT_2_G | Number of Uiso or Uij Restrained non-H Atoms ... | 18     | Report |
| PLAT007_ALERT_5_G | Number of Unrefined Donor-H Atoms .....          | 13     | Report |
| PLAT042_ALERT_1_G | Calc. and Reported MoietyFormula Strings Differ  | Please | Check  |
| PLAT172_ALERT_4_G | The CIF-Embedded .res File Contains DFIX Records | 1      | Report |
| PLAT175_ALERT_4_G | The CIF-Embedded .res File Contains SAME Records | 4      | Report |
| PLAT176_ALERT_4_G | The CIF-Embedded .res File Contains SADI Records | 1      | Report |
| PLAT178_ALERT_4_G | The CIF-Embedded .res File Contains SIMU Records | 1      | Report |
| PLAT187_ALERT_4_G | The CIF-Embedded .res File Contains RIGU Records | 1      | Report |
| PLAT302_ALERT_4_G | Anion/Solvent/Minor-Residue Disorder (Resd 3 )   | 100%   | Note   |
| PLAT302_ALERT_4_G | Anion/Solvent/Minor-Residue Disorder (Resd 4 )   | 100%   | Note   |
| PLAT302_ALERT_4_G | Anion/Solvent/Minor-Residue Disorder (Resd 5 )   | 100%   | Note   |
| PLAT302_ALERT_4_G | Anion/Solvent/Minor-Residue Disorder (Resd 6 )   | 100%   | Note   |
| PLAT304_ALERT_4_G | Non-Integer Number of Atoms in ..... Resd 3      | 20.03  | Check  |
| PLAT304_ALERT_4_G | Non-Integer Number of Atoms in ..... Resd 4      | 17.97  | Check  |
| PLAT304_ALERT_4_G | Non-Integer Number of Atoms in ..... Resd 5      | 16.47  | Check  |
| PLAT304_ALERT_4_G | Non-Integer Number of Atoms in ..... Resd 6      | 5.05   | Check  |
| PLAT432_ALERT_2_G | Short Inter X...Y Contact O12 ..C41              | 2.96   | Ang.   |
|                   | -1+x,y,z =                                       | 1_455  | Check  |
| PLAT789_ALERT_4_G | Atoms with Negative _atom_site_disorder_group #  | 38     | Check  |
| PLAT811_ALERT_5_G | No ADDSYM Analysis: Too Many Excluded Atoms .... | !      | Info   |
| PLAT860_ALERT_3_G | Number of Least-Squares Restraints .....         | 388    | Note   |
| PLAT910_ALERT_3_G | Missing # of FCF Reflection(s) Below Theta(Min). | 1      | Note   |
| PLAT912_ALERT_4_G | Missing # of FCF Reflections Above STh/L= 0.600  | 41     | Note   |

0 **ALERT level A** = Most likely a serious problem - resolve or explain  
0 **ALERT level B** = A potentially serious problem, consider carefully  
8 **ALERT level C** = Check. Ensure it is not caused by an omission or oversight  
23 **ALERT level G** = General information/check it is not something unexpected

1 ALERT type 1 CIF construction/syntax error, inconsistent or missing data  
7 ALERT type 2 Indicator that the structure model may be wrong or deficient  
6 ALERT type 3 Indicator that the structure quality may be low  
15 ALERT type 4 Improvement, methodology, query or suggestion  
2 ALERT type 5 Informative message, check

It is advisable to attempt to resolve as many as possible of the alerts in all categories. Often the minor alerts point to easily fixed oversights, errors and omissions in your CIF or refinement strategy, so attention to these fine details can be worthwhile. In order to resolve some of the more serious problems it may be necessary to carry out additional measurements or structure refinements. However, the purpose of your study may justify the reported deviations and the more serious of these should normally be commented upon in the discussion or experimental section of a paper or in the "special\_details" fields of the CIF. checkCIF was carefully designed to identify outliers and unusual parameters, but every test has its limitations and alerts that are not important in a particular case may appear. Conversely, the absence of alerts does not guarantee there are no aspects of the results needing attention. It is up to the individual to critically assess their own results and, if necessary, seek expert advice.

### **Publication of your CIF in IUCr journals**

A basic structural check has been run on your CIF. These basic checks will be run on all CIFs submitted for publication in IUCr journals (*Acta Crystallographica*, *Journal of Applied Crystallography*, *Journal of Synchrotron Radiation*); however, if you intend to submit to *Acta Crystallographica Section C* or *E* or *IUCrData*, you should make sure that full publication checks are run on the final version of your CIF prior to submission.

### **Publication of your CIF in other journals**

Please refer to the *Notes for Authors* of the relevant journal for any special instructions relating to CIF submission.

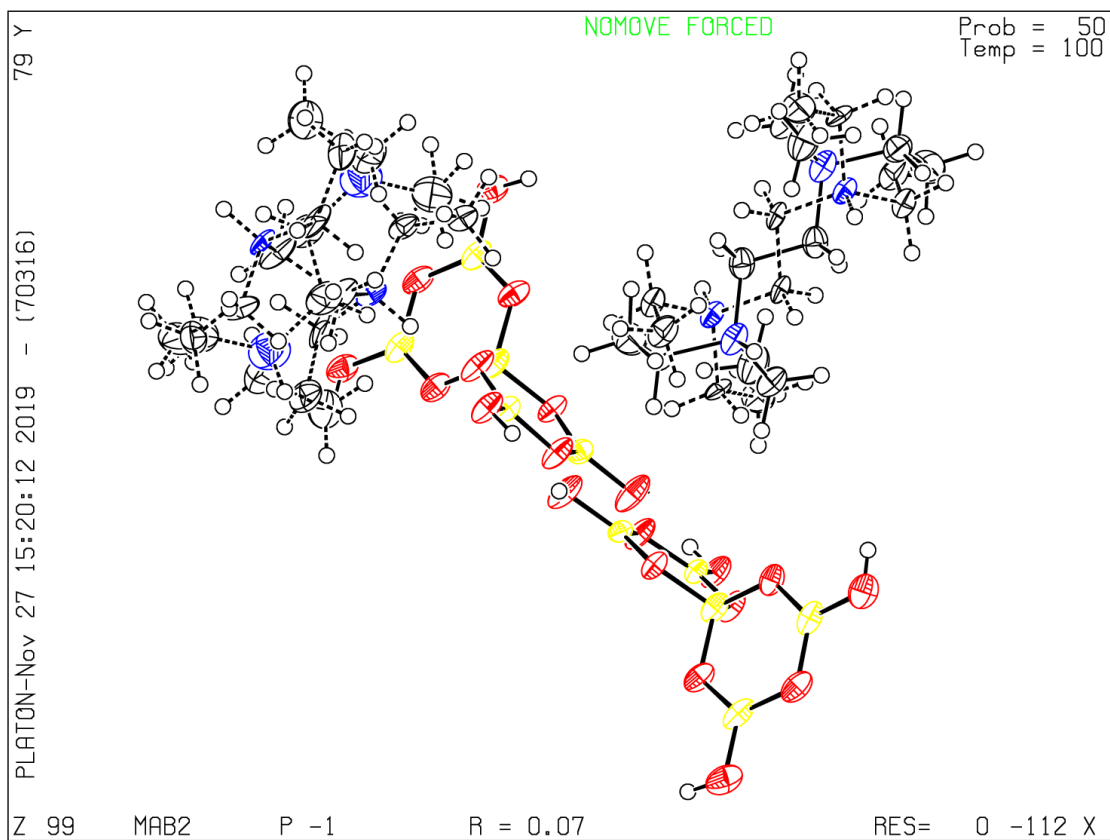

Supplement: Supplementary file 1 [file molecules-25-00053-s001.zip › MAB2_checkcif.pdf]
