# Supplementary material for: Pentaborate(1-) Salts and a Tetraborate(2-) Salt Derived from C2- or C3-Linked Bis(alkylammonium) Dications: Synthesis, Characterization, and Structural (XRD) Studies
Source: Molecules. 2019 Dec 23;25(1):53. doi: 10.3390/molecules25010053 (PMC6982793; doi:10.3390/molecules25010053)

# checkCIF/PLATON report

Structure factors have been supplied for datablock(s) MAB9

THIS REPORT IS FOR GUIDANCE ONLY. IF USED AS PART OF A REVIEW PROCEDURE FOR PUBLICATION, IT SHOULD NOT REPLACE THE EXPERTISE OF AN EXPERIENCED CRYSTALLOGRAPHIC REFEREE.

No syntax errors found.      CIF dictionary      Interpreting this report

## Datablock: MAB9

---

Bond precision:    O- B = 0.0023 A                      Wavelength=0.71075

Cell:                      a=9.0242(2)              b=12.0350(3)              c=11.1688(4)  
                            alpha=90              beta=109.811(3)              gamma=90  
Temperature:              100 K

|                | Calculated                               | Reported                                    |
|----------------|------------------------------------------|---------------------------------------------|
| Volume         | 1141.21(6)                               | 1141.21(6)                                  |
| Space group    | P 21                                     | P 1 21 1                                    |
| Hall group     | P 2yb                                    | P 2yb                                       |
| Moiety formula | B4 H4 O9, C8 H22 N2, 2(B H3 O3), 2(H2 O) | B4 H4 O9, 2(B H3 O3), 2(H2 O), 1(C8 H22 N2) |
| Sum formula    | C8 H36 B6 N2 O17                         | C8 H36 B6 N2 O17                            |
| Mr             | 497.25                                   | 497.25                                      |
| Dx,g cm-3      | 1.447                                    | 1.447                                       |
| Z              | 2                                        | 2                                           |
| Mu (mm-1)      | 0.131                                    | 0.131                                       |
| F000           | 528.0                                    | 528.0                                       |
| F000'          | 528.38                                   |                                             |
| h,k,lmax       | 11,15,14                                 | 11,15,14                                    |
| Nref           | 5256[ 2754]                              | 5229                                        |
| Tmin,Tmax      | 0.988,0.997                              | 0.772,1.000                                 |
| Tmin'          | 0.983                                    |                                             |

Correction method= # Reported T Limits: Tmin=0.772 Tmax=1.000  
AbsCorr = MULTI-SCAN

Data completeness= 1.90/0.99                      Theta(max)= 27.480

R(reflections)= 0.0303( 4895)                      wR2(reflections)= 0.0802( 5229)

S = 1.059                                      Npar= 449

---

The following ALERTS were generated. Each ALERT has the format

**test-name\_ALERT\_alert-type\_alert-level.**

Click on the hyperlinks for more details of the test.

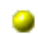

### Alert level C

PLAT089\_ALERT\_3\_C Poor Data / Parameter Ratio (Zmax < 18) ..... 6.13 Note

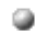

### Alert level G

PLAT002\_ALERT\_2\_G Number of Distance or Angle Restraints on AtSite 31 Note  
PLAT003\_ALERT\_2\_G Number of Uiso or Uij Restrained non-H Atoms ... 55 Report  
PLAT007\_ALERT\_5\_G Number of Unrefined Donor-H Atoms ..... 17 Report  
PLAT042\_ALERT\_1\_G Calc. and Reported MoietyFormula Strings Differ Please Check  
PLAT171\_ALERT\_4\_G The CIF-Embedded .res File Contains EADP Records 1 Report  
PLAT172\_ALERT\_4\_G The CIF-Embedded .res File Contains DFIX Records 1 Report  
PLAT175\_ALERT\_4\_G The CIF-Embedded .res File Contains SAME Records 2 Report  
PLAT178\_ALERT\_4\_G The CIF-Embedded .res File Contains SIMU Records 1 Report  
PLAT187\_ALERT\_4\_G The CIF-Embedded .res File Contains RIGU Records 1 Report  
PLAT302\_ALERT\_4\_G Anion/Solvent/Minor-Residue Disorder (Resd 2 ) 100% Note  
PLAT302\_ALERT\_4\_G Anion/Solvent/Minor-Residue Disorder (Resd 3 ) 100% Note  
PLAT302\_ALERT\_4\_G Anion/Solvent/Minor-Residue Disorder (Resd 4 ) 100% Note  
PLAT302\_ALERT\_4\_G Anion/Solvent/Minor-Residue Disorder (Resd 6 ) 100% Note  
PLAT302\_ALERT\_4\_G Anion/Solvent/Minor-Residue Disorder (Resd 7 ) 100% Note  
PLAT304\_ALERT\_4\_G Non-Integer Number of Atoms in ..... Resd 2 15.17 Check  
PLAT304\_ALERT\_4\_G Non-Integer Number of Atoms in ..... Resd 3 9.18 Check  
PLAT304\_ALERT\_4\_G Non-Integer Number of Atoms in ..... Resd 4 7.65 Check  
PLAT304\_ALERT\_4\_G Non-Integer Number of Atoms in ..... Resd 6 5.32 Check  
PLAT304\_ALERT\_4\_G Non-Integer Number of Atoms in ..... Resd 7 1.68 Check  
PLAT432\_ALERT\_2\_G Short Inter X...Y Contact O31 ..C7B 2.52 Ang.  
1-x,-1/2+y,2-z = 2\_647 Check  
PLAT720\_ALERT\_4\_G Number of Unusual/Non-Standard Labels ..... 44 Note  
PLAT790\_ALERT\_4\_G Centre of Gravity not Within Unit Cell: Resd. # 5 Note  
B H3 O3  
PLAT811\_ALERT\_5\_G No ADDSYM Analysis: Too Many Excluded Atoms .... ! Info  
PLAT860\_ALERT\_3\_G Number of Least-Squares Restraints ..... 974 Note

0 **ALERT level A** = Most likely a serious problem - resolve or explain  
0 **ALERT level B** = A potentially serious problem, consider carefully  
1 **ALERT level C** = Check. Ensure it is not caused by an omission or oversight  
24 **ALERT level G** = General information/check it is not something unexpected

1 ALERT type 1 CIF construction/syntax error, inconsistent or missing data  
3 ALERT type 2 Indicator that the structure model may be wrong or deficient  
2 ALERT type 3 Indicator that the structure quality may be low  
17 ALERT type 4 Improvement, methodology, query or suggestion  
2 ALERT type 5 Informative message, check

It is advisable to attempt to resolve as many as possible of the alerts in all categories. Often the minor alerts point to easily fixed oversights, errors and omissions in your CIF or refinement strategy, so attention to these fine details can be worthwhile. In order to resolve some of the more serious problems it may be necessary to carry out additional measurements or structure refinements. However, the purpose of your study may justify the reported deviations and the more serious of these should normally be commented upon in the discussion or experimental section of a paper or in the "special\_details" fields of the CIF. checkCIF was carefully designed to identify outliers and unusual parameters, but every test has its limitations and alerts that are not important in a particular case may appear. Conversely, the absence of alerts does not guarantee there are no aspects of the results needing attention. It is up to the individual to critically assess their own results and, if necessary, seek expert advice.

### **Publication of your CIF in IUCr journals**

A basic structural check has been run on your CIF. These basic checks will be run on all CIFs submitted for publication in IUCr journals (*Acta Crystallographica*, *Journal of Applied Crystallography*, *Journal of Synchrotron Radiation*); however, if you intend to submit to *Acta Crystallographica Section C* or *E* or *IUCrData*, you should make sure that full publication checks are run on the final version of your CIF prior to submission.

### **Publication of your CIF in other journals**

Please refer to the *Notes for Authors* of the relevant journal for any special instructions relating to CIF submission.

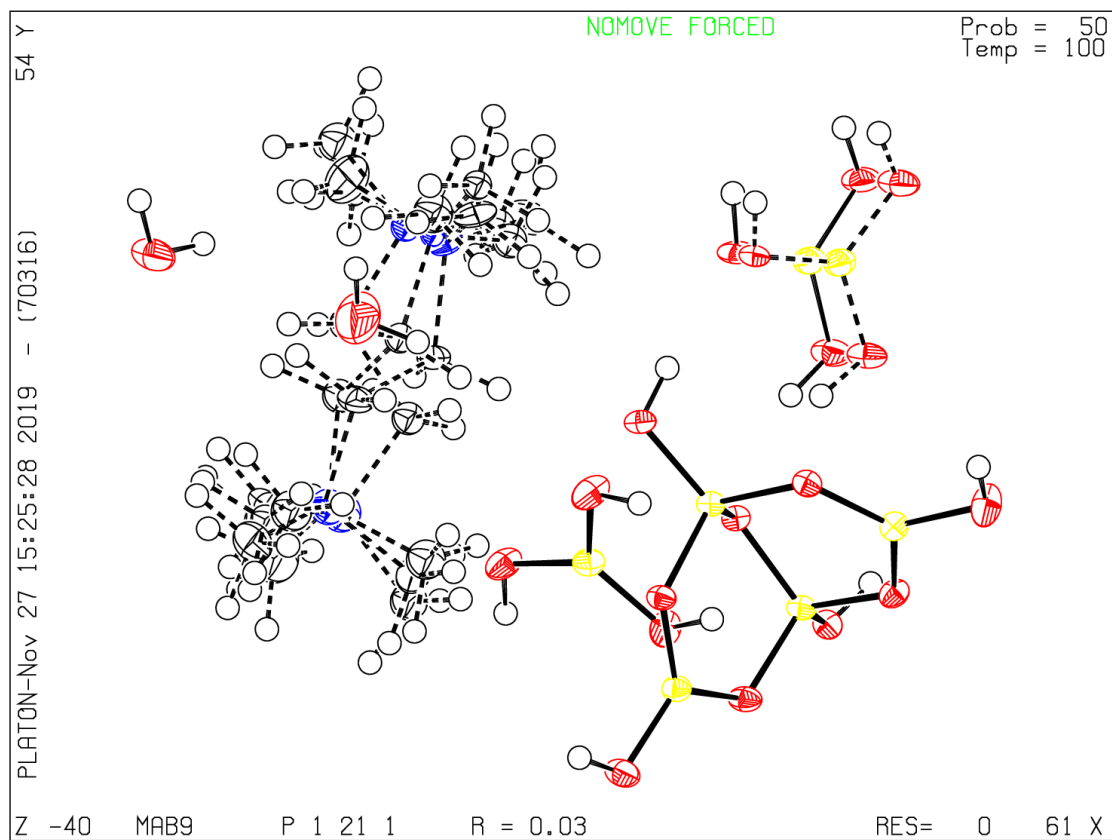

Supplement: Supplementary file 1 [file molecules-25-00053-s001.zip › MAB9_checkcif.pdf]
