# Supplementary material for: Pentaborate(1-) Salts and a Tetraborate(2-) Salt Derived from C2- or C3-Linked Bis(alkylammonium) Dications: Synthesis, Characterization, and Structural (XRD) Studies
Source: Molecules. 2019 Dec 23;25(1):53. doi: 10.3390/molecules25010053 (PMC6982793; doi:10.3390/molecules25010053)
Supplement: Supplementary file 1 [file molecules-25-00053-s001.zip]

Archive with 15 entries (15 files):
- MAB2.cif
- MAB2.docx
- MAB2_checkcif.pdf
- MAB3.cif
- MAB3.docx
- MAB3_checkcif.pdf
- MAB7.cif
- MAB7.docx
- MAB7_checkcif.pdf
- MAB8.cif
- MAB8.docx
- MAB8_checkcif.pdf
- MAB9.cif
- MAB9.docx
- MAB9_checkcif.pdf
