# Supplementary material for: Pentaborate(1-) Salts and a Tetraborate(2-) Salt Derived from C2- or C3-Linked Bis(alkylammonium) Dications: Synthesis, Characterization, and Structural (XRD) Studies
Source: Molecules. 2019 Dec 23;25(1):53. doi: 10.3390/molecules25010053 (PMC6982793; doi:10.3390/molecules25010053)
Supplement: Supplementary file 1 [file molecules-25-00053-s001.zip › MAB2.cif]

data_MAB2

#2012ncs0235

_audit_creation_date               2019-11-25
_audit_creation_method
;
Olex2 1.3
(compiled 2019.09.11 svn.r3662 for OlexSys, GUI svn.r5938)
;
_shelx_SHELXL_version_number       '2018/3'
loop_
  _audit_author_name
  _audit_author_email
  _audit_author_address
 'Beckett, M.A.' ''
;
Bangor University
School of Chemistry
Bangor
LL57 2UW
UK
;
 'Horton, P.N.' pnh@soton.ac.uk
;
University of Southampton
Chemistry
Southampton
SO17 1BJ
UK
;

_audit_contact_author_address      ?
_audit_contact_author_email        ?
_audit_contact_author_name         ''
_audit_contact_author_phone        ?
_publ_contact_author_id_orcid      ?
_publ_section_references
;
Dolomanov, O.V., Bourhis, L.J., Gildea, R.J, Howard, J.A.K. & Puschmann, H.
 (2009), J. Appl. Cryst. 42, 339-341.

Sheldrick, G.M. (2015). Acta Cryst. A71, 3-8.

Sheldrick, G.M. (2015). Acta Cryst. C71, 3-8.
;
_chemical_name_common              ?
_chemical_name_systematic          ?
_chemical_formula_moiety           '2(B5 H4 O10), 2(C5 H13 N)'
_chemical_formula_sum              'C10 H34 B10 N2 O20'
_chemical_formula_weight           610.49
_chemical_melting_point            ?
_chemical_oxdiff_formula           'C10 H34 B10 N2 O20'
loop_
  _atom_type_symbol
  _atom_type_description
  _atom_type_scat_dispersion_real
  _atom_type_scat_dispersion_imag
  _atom_type_scat_source
 'C' 'C' 0.0033 0.0016 'International Tables Vol C Tables 4.2.6.8 and 6.1.1.4'
 'H' 'H' 0.0000 0.0000 'International Tables Vol C Tables 4.2.6.8 and 6.1.1.4'
 'B' 'B' 0.0013 0.0007 'International Tables Vol C Tables 4.2.6.8 and 6.1.1.4'
 'N' 'N' 0.0061 0.0033 'International Tables Vol C Tables 4.2.6.8 and 6.1.1.4'
 'O' 'O' 0.0106 0.0060 'International Tables Vol C Tables 4.2.6.8 and 6.1.1.4'

_shelx_space_group_comment
;
The symmetry employed for this shelxl refinement is uniquely defined
by the following loop, which should always be used as a source of
symmetry information in preference to the above space-group names.
They are only intended as comments.
;
_space_group_crystal_system        'triclinic'
_space_group_IT_number             2
_space_group_name_H-M_alt          'P -1'
_space_group_name_Hall             '-P 1'
loop_
  _space_group_symop_operation_xyz
 'x, y, z'
 '-x, -y, -z'

_cell_length_a                     8.3998(5)
_cell_length_b                     9.1406(7)
_cell_length_c                     18.2066(13)
_cell_angle_alpha                  78.439(6)
_cell_angle_beta                   86.810(5)
_cell_angle_gamma                  88.118(6)
_cell_volume                       1367.07(17)
_cell_formula_units_Z              2
_cell_measurement_reflns_used      3043
_cell_measurement_temperature      100(2)
_cell_measurement_theta_max        30.7510
_cell_measurement_theta_min        2.2560
_shelx_estimated_absorpt_T_max     0.999
_shelx_estimated_absorpt_T_min     0.987
_exptl_absorpt_coefficient_mu      0.130
_exptl_absorpt_correction_T_max    1.00000
_exptl_absorpt_correction_T_min    0.72665
_exptl_absorpt_correction_type     multi-scan
_exptl_absorpt_process_details    
 'CrysAlisPro 1.171.40.53 (Rigaku Oxford Diffraction, 2019) Empirical absorption correction using spherical harmonics, implemented in SCALE3 ABSPACK scaling algorithm.'
_exptl_absorpt_special_details     ?
_exptl_crystal_colour              colourless
_exptl_crystal_colour_primary      colourless
_exptl_crystal_density_diffrn      1.483
_exptl_crystal_density_meas        ?
_exptl_crystal_density_method      ?
_exptl_crystal_description         plate
_exptl_crystal_F_000               636
_exptl_crystal_recrystallization_method 
 'The material was recrystallised from water'
_exptl_crystal_size_max            0.1
_exptl_crystal_size_mid            0.04
_exptl_crystal_size_min            0.01
_exptl_transmission_factor_max     ?
_exptl_transmission_factor_min     ?
_diffrn_reflns_av_R_equivalents    0.0461
_diffrn_reflns_av_unetI/netI       0.1059
_diffrn_reflns_Laue_measured_fraction_full  0.984
_diffrn_reflns_Laue_measured_fraction_max  0.981
_diffrn_reflns_limit_h_max         9
_diffrn_reflns_limit_h_min         -10
_diffrn_reflns_limit_k_max         11
_diffrn_reflns_limit_k_min         -10
_diffrn_reflns_limit_l_max         23
_diffrn_reflns_limit_l_min         -21
_diffrn_reflns_number              11455
_diffrn_reflns_point_group_measured_fraction_full  0.984
_diffrn_reflns_point_group_measured_fraction_max  0.981
_diffrn_reflns_theta_full          25.242
_diffrn_reflns_theta_max           27.486
_diffrn_reflns_theta_min           2.275
_diffrn_ambient_temperature        100(2)
_diffrn_detector                   'CCD area detector'
_diffrn_detector_area_resol_mean   28.5714
_diffrn_detector_type              'Rigaku HG Saturn724+ (2x2 bin mode)'
_diffrn_measured_fraction_theta_full  0.984
_diffrn_measured_fraction_theta_max  0.981
_diffrn_measurement_details
;
List of Runs (angles in degrees, time in seconds):

  # Type    Start    End  Width  t~exp~   \w     \q     \k     \f   Frames
--------------------------------------------------------------------------
  1  \w   -110.00  18.00   1.00   20.00    --  -20.00 -70.00 270.00  128
  2  \w   -110.00   6.00   1.00   20.00    --  -20.00 -70.00 135.00  116
  3  \w    -80.00 -20.00   1.00   20.00    --  -20.00   0.00 315.00   60
  4  \w    -62.00 -14.00   1.00   20.00    --  -20.00 -70.00  45.00   48
  5  \w    -10.00  20.00   1.00   20.00    --  -20.00   0.00  45.00   30
;
_diffrn_measurement_device         'four-circle \k goniometer'
_diffrn_measurement_device_type   
 'Rigaku FRE+ equipped with VHF Varimax confocal mirrors and an AFC12 goniometer and HG Saturn 724+ detector'
_diffrn_measurement_method         'profile data from \w-scans'
_diffrn_measurement_specimen_support  'MiTeGen MicroLoop'
_diffrn_orient_matrix_type        
 'CrysAlisPro convention (1999,Acta A55,543-557)'
_diffrn_orient_matrix_UB_11        -0.0554680000
_diffrn_orient_matrix_UB_12        -0.0052855000
_diffrn_orient_matrix_UB_13        -0.0272881000
_diffrn_orient_matrix_UB_21        0.0402897000
_diffrn_orient_matrix_UB_22        0.0567403000
_diffrn_orient_matrix_UB_23        -0.0260170000
_diffrn_orient_matrix_UB_31        0.0495607000
_diffrn_orient_matrix_UB_32        -0.0550389000
_diffrn_orient_matrix_UB_33        -0.0127955000
_diffrn_radiation_collimation      0.2
_diffrn_radiation_monochromator    'Confocal mirrors, VHF Varimax'
_diffrn_radiation_probe            x-ray
_diffrn_radiation_type             'Mo K\a'
_diffrn_radiation_wavelength       0.71075
_diffrn_radiation_xray_symbol      K-L~3~
_diffrn_source                     'Rotating Anode'
_diffrn_source_current             55.0
_diffrn_source_power               2.475
_diffrn_source_target              Mo
_diffrn_source_type                'Rigaku FRE+'
_diffrn_source_voltage             45.0
_reflns_Friedel_coverage           0.000
_reflns_Friedel_fraction_full      .
_reflns_Friedel_fraction_max       .
_reflns_number_gt                  2997
_reflns_number_total               6146
_reflns_odcompleteness_completeness  98.10
_reflns_odcompleteness_iscentric   1
_reflns_odcompleteness_theta       27.42
_reflns_special_details
;
 Reflections were merged by SHELXL according to the crystal
 class for the calculation of statistics and refinement.
 
 _reflns_Friedel_fraction is defined as the number of unique
 Friedel pairs measured divided by the number that would be
 possible theoretically, ignoring centric projections and
 systematic absences.
;
_reflns_threshold_expression       'I > 2\s(I)'
_computing_cell_refinement         'CrysAlisPro 1.171.40.53 (Rigaku OD, 2019)'
_computing_data_collection        
 'CrystalClear-SM Expert 2.0 r13 (Rigaku, 2011)'
_computing_data_reduction          'CrysAlisPro 1.171.40.53 (Rigaku OD, 2019)'
_computing_molecular_graphics      'Olex2 1.3 (Dolomanov et al., 2009)'
_computing_publication_material    'Olex2 1.3 (Dolomanov et al., 2009)'
_computing_structure_refinement    'ShelXL 2018/3 (Sheldrick, 2015)'
_computing_structure_solution      'SHELXT 2018/2 (Sheldrick, 2018)'
_refine_diff_density_max           0.485
_refine_diff_density_min           -0.255
_refine_diff_density_rms           0.069
_refine_ls_extinction_coef         .
_refine_ls_extinction_method       none
_refine_ls_goodness_of_fit_ref     1.005
_refine_ls_hydrogen_treatment      constr
_refine_ls_matrix_type             full
_refine_ls_number_parameters       561
_refine_ls_number_reflns           6146
_refine_ls_number_restraints       388
_refine_ls_R_factor_all            0.1666
_refine_ls_R_factor_gt             0.0748
_refine_ls_restrained_S_all        1.022
_refine_ls_shift/su_max            0.000
_refine_ls_shift/su_mean           0.000
_refine_ls_structure_factor_coef   Fsqd
_refine_ls_weighting_details      
 'w=1/[\s^2^(Fo^2^)+(0.0758P)^2^] where P=(Fo^2^+2Fc^2^)/3'
_refine_ls_weighting_scheme        calc
_refine_ls_wR_factor_gt            0.1460
_refine_ls_wR_factor_ref           0.1850
_refine_special_details           
 'The cations are disordered across the inversion centre. As such geometrical (SAME and DFIX) and displacement (SIMU and RIGU) restraints have been employed. Also the atoms of the smaller component of one of the cations have been left isotropic.'
_olex2_refinement_description
;
1. Fixed Uiso
 At 1.2 times of:
  All C(H,H) groups, All N(H) groups
 At 1.5 times of:
  All C(H,H,H) groups, All O(H) groups
2. Restrained distances
 C1-C1_$2 = C11-C11_$2 = C21-C21_$1 = C31-C31_$1 = C41-C41_$1
 1.5 with sigma of 0.02
 N1-C1_$2 \\sim N11-C11_$2 \\sim N21-C21_$1 \\sim N31-C31_$1 \\sim N41-C41_$1
 with sigma of 0.02
3. Uiso/Uaniso restraints and constraints
C41 \\sim C21 \\sim N21 \\sim C31 \\sim C22 \\sim C24 \\sim N31 \\sim C23 \\sim
C25 \\sim C32 \\sim C34 \\sim C42 \\sim C44 \\sim N41 \\sim C33 \\sim C35 \\sim
C43 \\sim C45: within 2A with sigma of 0.02 and sigma for terminal atoms of
0.04 within 2A
4. Rigid body (RIGU) restrains
 C21, N21, C31, C22, C24, N31, C23, C25, C32, C34, C41, C42, C44, N41, C33,
 C35, C43, C45
 with sigma for 1-2 distances of 0.004 and sigma for 1-3 distances of 0.004
5. Same fragment restrains
{C1, C2, C3, C4, C5, N1} sigma for 1-2: 0.02, 1-3: 0.04
as in
{C11, C12, C13, C14, C15, N11}
{C1, C2, C3, C4, C5, N1} sigma for 1-2: 0.02, 1-3: 0.04
as in
{C21, C22, C23, C24, C25, N21}
{C1, C2, C3, C4, C5, N1} sigma for 1-2: 0.02, 1-3: 0.04
as in
{C31, C32, C33, C34, C35, N31}
{C1, C2, C3, C4, C5, N1} sigma for 1-2: 0.02, 1-3: 0.04
as in
{C41, C42, C43, C44, C45, N41}
6. Others
 Sof(C11)=Sof(H11A)=Sof(H11B)=Sof(C12)=Sof(H12A)=Sof(H12B)=Sof(C13)=Sof(H13A)=
 Sof(H13B)=Sof(H13C)=Sof(C14)=Sof(H14A)=Sof(H14B)=Sof(C15)=Sof(H15A)=Sof(H15B)=
 Sof(H15C)=Sof(N11)=Sof(H11)=1-FVAR(1)
 Sof(C1)=Sof(H1A)=Sof(H1B)=Sof(C2)=Sof(H2A)=Sof(H2B)=Sof(C3)=Sof(H3A)=Sof(H3B)=
 Sof(H3C)=Sof(C4)=Sof(H4A)=Sof(H4B)=Sof(C5)=Sof(H5A)=Sof(H5B)=Sof(H5C)=Sof(N1)=
 Sof(H1)=FVAR(1)
 Sof(C41)=Sof(H41A)=Sof(H41B)=Sof(C42)=Sof(H42A)=Sof(H42B)=Sof(C43)=Sof(H43A)=
 Sof(H43B)=Sof(H43C)=Sof(C44)=Sof(H44A)=Sof(H44B)=Sof(C45)=Sof(H45A)=Sof(H45B)=
 Sof(H45C)=Sof(N41)=Sof(H41)=1-FVAR(2)
 Sof(C21)=Sof(H21A)=Sof(H21B)=Sof(C22)=Sof(H22A)=Sof(H22B)=Sof(C23)=Sof(H23A)=
 Sof(H23B)=Sof(H23C)=Sof(C24)=Sof(H24A)=Sof(H24B)=Sof(C25)=Sof(H25A)=Sof(H25B)=
 Sof(H25C)=Sof(N21)=Sof(H21)=Sof(C31)=Sof(H31A)=Sof(H31B)=Sof(C32)=Sof(H32A)=
 Sof(H32B)=Sof(C33)=Sof(H33A)=Sof(H33B)=Sof(H33C)=Sof(C34)=Sof(H34A)=Sof(H34B)=
 Sof(C35)=Sof(H35A)=Sof(H35B)=Sof(H35C)=Sof(N31)=Sof(H31)=0.5*FVAR(3)
7.a Ternary CH refined with riding coordinates:
 N1(H1), N11(H11), N21(H21), N31(H31), N41(H41)
7.b Secondary CH2 refined with riding coordinates:
 C1(H1A,H1B), C2(H2A,H2B), C4(H4A,H4B), C11(H11A,H11B), C12(H12A,H12B),
 C14(H14A,H14B), C21(H21A,H21B), C22(H22A,H22B), C24(H24A,H24B), C31(H31A,H31B),
  C32(H32A,H32B), C34(H34A,H34B), C41(H41A,H41B), C42(H42A,H42B), C44(H44A,H44B)
7.c Idealised Me refined as rotating group:
 C3(H3A,H3B,H3C), C5(H5A,H5B,H5C), C13(H13A,H13B,H13C), C15(H15A,H15B,H15C),
 C23(H23A,H23B,H23C), C25(H25A,H25B,H25C), C33(H33A,H33B,H33C), C35(H35A,H35B,
 H35C), C43(H43A,H43B,H43C), C45(H45A,H45B,H45C)
7.d Idealised tetrahedral OH refined as rotating group:
 O7(H7), O8(H8), O9(H9), O10(H10), O17(H17), O18(H18), O19(H19), O20(H20)
;
_atom_sites_solution_hydrogens     geom
_atom_sites_solution_primary       dual
_atom_sites_solution_secondary     ?
loop_
  _atom_site_label
  _atom_site_type_symbol
  _atom_site_fract_x
  _atom_site_fract_y
  _atom_site_fract_z
  _atom_site_U_iso_or_equiv
  _atom_site_adp_type
  _atom_site_occupancy
  _atom_site_site_symmetry_order
  _atom_site_calc_flag
  _atom_site_refinement_flags_posn
  _atom_site_refinement_flags_adp
  _atom_site_refinement_flags_occupancy
  _atom_site_disorder_assembly
  _atom_site_disorder_group
 B1 B 0.8885(4) 0.2797(5) 0.1428(2) 0.0278(9) Uani 1 1 d . . . . .
 B2 B 0.7699(4) 0.4341(4) 0.2296(2) 0.0217(8) Uani 1 1 d . . . . .
 B3 B 0.5982(4) 0.3073(4) 0.1643(2) 0.0213(8) Uani 1 1 d . . . . .
 B4 B 1.0893(4) 0.0775(5) 0.1366(2) 0.0313(10) Uani 1 1 d . . . . .
 B5 B 1.0880(4) 0.2883(5) 0.0363(2) 0.0314(10) Uani 1 1 d . . . . .
 O1 O 0.8986(2) 0.3796(3) 0.19689(12) 0.0253(5) Uani 1 1 d . . . . .
 O2 O 0.6182(2) 0.3988(3) 0.21450(13) 0.0309(6) Uani 1 1 d . . . . .
 O3 O 0.7248(2) 0.2510(3) 0.12997(12) 0.0290(6) Uani 1 1 d . . . . .
 O4 O 0.9719(2) 0.1394(3) 0.17410(12) 0.0295(6) Uani 1 1 d . . . . .
 O5 O 1.1456(2) 0.1457(3) 0.06561(13) 0.0342(6) Uani 1 1 d . . . . .
 O6 O 0.9703(2) 0.3541(3) 0.07199(12) 0.0291(6) Uani 1 1 d . . . . .
 O7 O 0.7810(2) 0.5276(3) 0.27872(13) 0.0359(7) Uani 1 1 d . . . . .
 H7 H 0.876993 0.548135 0.281285 0.054 Uiso 1 1 calc R U . . .
 O8 O 0.4486(2) 0.2768(3) 0.14852(13) 0.0322(6) Uani 1 1 d . . . . .
 H8 H 0.382029 0.322323 0.172408 0.048 Uiso 1 1 calc R U . . .
 O9 O 1.1605(3) -0.0562(3) 0.16605(14) 0.0403(7) Uani 1 1 d . . . . .
 H9 H 1.120567 -0.088542 0.209372 0.060 Uiso 1 1 calc R U . . .
 O10 O 1.1589(3) 0.3585(3) -0.03017(13) 0.0393(7) Uani 1 1 d . . . . .
 H10 H 1.115487 0.442976 -0.043778 0.059 Uiso 1 1 calc R U . . .
 B11 B 0.1000(4) 0.6923(5) 0.3465(2) 0.0290(10) Uani 1 1 d . . . . .
 B12 B -0.0981(4) 0.8995(5) 0.3457(2) 0.0302(10) Uani 1 1 d . . . . .
 B13 B -0.1017(4) 0.6970(5) 0.4515(2) 0.0292(10) Uani 1 1 d . . . . .
 B14 B 0.2175(4) 0.5119(4) 0.2722(2) 0.0244(9) Uani 1 1 d . . . . .
 B15 B 0.3911(4) 0.6444(4) 0.3338(2) 0.0247(9) Uani 1 1 d . . . . .
 O11 O 0.0221(2) 0.8328(3) 0.31118(12) 0.0300(6) Uani 1 1 d . . . . .
 O12 O -0.1586(2) 0.8354(3) 0.41670(13) 0.0315(6) Uani 1 1 d . . . . .
 O13 O 0.0174(2) 0.6268(3) 0.41851(12) 0.0304(6) Uani 1 1 d . . . . .
 O14 O 0.0894(2) 0.5853(2) 0.29612(12) 0.0263(6) Uani 1 1 d . . . . .
 O15 O 0.3677(2) 0.5378(3) 0.29182(13) 0.0322(6) Uani 1 1 d . . . . .
 O16 O 0.2654(2) 0.7190(3) 0.35955(13) 0.0336(6) Uani 1 1 d . . . . .
 O17 O -0.1627(3) 1.0346(3) 0.31495(14) 0.0366(6) Uani 1 1 d . . . . .
 H17 H -0.120928 1.064130 0.271724 0.055 Uiso 1 1 calc R U . . .
 O18 O -0.1687(3) 0.6391(3) 0.52039(13) 0.0359(6) Uani 1 1 d . . . . .
 H18 H -0.118653 0.560737 0.539220 0.054 Uiso 1 1 calc R U . . .
 O19 O 0.2041(2) 0.4124(3) 0.22700(14) 0.0407(7) Uani 1 1 d . . . . .
 H19 H 0.107623 0.404703 0.218791 0.061 Uiso 1 1 calc R U . . .
 O20 O 0.5395(2) 0.6763(3) 0.34986(13) 0.0325(6) Uani 1 1 d . . . . .
 H20 H 0.606933 0.629840 0.326884 0.049 Uiso 1 1 calc R U . . .
 C1 C 0.4957(8) 0.9163(7) 0.0071(4) 0.0235(19) Uani 0.473(5) 1 d D . P A 1
 H1A H 0.601391 0.873390 -0.004972 0.028 Uiso 0.473(5) 1 calc R U P A 1
 H1B H 0.417988 0.887084 -0.025954 0.028 Uiso 0.473(5) 1 calc R U P A 1
 C2 C 0.4379(8) 0.6848(7) 0.1011(4) 0.0242(18) Uani 0.473(5) 1 d D . P A 1
 H2A H 0.536705 0.644432 0.079569 0.029 Uiso 0.473(5) 1 calc R U P A 1
 H2B H 0.430673 0.642865 0.155631 0.029 Uiso 0.473(5) 1 calc R U P A 1
 C3 C 0.2956(14) 0.6378(12) 0.0651(9) 0.042(3) Uani 0.473(5) 1 d D . P A 1
 H3A H 0.198258 0.682426 0.084263 0.062 Uiso 0.473(5) 1 calc R U P A 1
 H3B H 0.288840 0.528731 0.077152 0.062 Uiso 0.473(5) 1 calc R U P A 1
 H3C H 0.307410 0.671764 0.010546 0.062 Uiso 0.473(5) 1 calc R U P A 1
 C4 C 0.5452(7) 0.9045(10) 0.1455(4) 0.0270(19) Uani 0.473(5) 1 d D . P A 1
 H4A H 0.528565 1.013336 0.141990 0.032 Uiso 0.473(5) 1 calc R U P A 1
 H4B H 0.507134 0.854004 0.196463 0.032 Uiso 0.473(5) 1 calc R U P A 1
 C5 C 0.7217(11) 0.8715(16) 0.1356(6) 0.038(3) Uani 0.473(5) 1 d D . P A 1
 H5A H 0.738421 0.766614 0.131711 0.057 Uiso 0.473(5) 1 calc R U P A 1
 H5B H 0.776204 0.890406 0.178856 0.057 Uiso 0.473(5) 1 calc R U P A 1
 H5C H 0.764960 0.936002 0.089696 0.057 Uiso 0.473(5) 1 calc R U P A 1
 N1 N 0.4458(7) 0.8547(6) 0.0883(3) 0.0238(16) Uani 0.473(5) 1 d D . P A 1
 H1 H 0.334508 0.892657 0.096444 0.029 Uiso 0.473(5) 1 calc R U P A 1
 C11 C 0.5030(8) 0.9789(8) 0.0418(3) 0.0313(19) Uani 0.527(5) 1 d D . P A 2
 H11A H 0.395605 0.993355 0.064898 0.038 Uiso 0.527(5) 1 calc R U P A 2
 H11B H 0.576772 1.045417 0.059290 0.038 Uiso 0.527(5) 1 calc R U P A 2
 C12 C 0.4607(7) 0.7034(8) 0.0407(4) 0.0371(19) Uani 0.527(5) 1 d D . P A 2
 H12A H 0.474070 0.717785 -0.014616 0.044 Uiso 0.527(5) 1 calc R U P A 2
 H12B H 0.503336 0.602580 0.062220 0.044 Uiso 0.527(5) 1 calc R U P A 2
 C13 C 0.2870(11) 0.7110(13) 0.0624(8) 0.046(3) Uani 0.527(5) 1 d D . P A 2
 H13A H 0.272565 0.697345 0.117158 0.068 Uiso 0.527(5) 1 calc R U P A 2
 H13B H 0.231914 0.632085 0.045278 0.068 Uiso 0.527(5) 1 calc R U P A 2
 H13C H 0.242412 0.808656 0.039135 0.068 Uiso 0.527(5) 1 calc R U P A 2
 C14 C 0.5700(8) 0.7857(9) 0.1513(3) 0.0341(18) Uani 0.527(5) 1 d D . P A 2
 H14A H 0.472785 0.823851 0.175164 0.041 Uiso 0.527(5) 1 calc R U P A 2
 H14B H 0.576791 0.676163 0.169433 0.041 Uiso 0.527(5) 1 calc R U P A 2
 C15 C 0.7140(12) 0.8559(14) 0.1739(5) 0.046(3) Uani 0.527(5) 1 d D . P A 2
 H15A H 0.809877 0.822289 0.148272 0.070 Uiso 0.527(5) 1 calc R U P A 2
 H15B H 0.723001 0.826368 0.228349 0.070 Uiso 0.527(5) 1 calc R U P A 2
 H15C H 0.703062 0.964876 0.159895 0.070 Uiso 0.527(5) 1 calc R U P A 2
 N11 N 0.5575(7) 0.8194(6) 0.0670(3) 0.0313(16) Uani 0.527(5) 1 d D . P A 2
 H11 H 0.668281 0.811462 0.044887 0.038 Uiso 0.527(5) 1 calc R U P A 2
 C21 C 0.5104(14) 0.9308(14) 0.4804(8) 0.042(3) Uani 0.4335(19) 1 d D U P B -1
 H21A H 0.559700 0.833775 0.503382 0.050 Uiso 0.4335(19) 1 calc R U P B -1
 H21B H 0.580682 0.976729 0.437041 0.050 Uiso 0.4335(19) 1 calc R U P B -1
 C22 C 0.2632(19) 0.8093(15) 0.5192(8) 0.046(3) Uani 0.4335(19) 1 d D U P B -1
 H22A H 0.237742 0.868297 0.558557 0.055 Uiso 0.4335(19) 1 calc R U P B -1
 H22B H 0.162434 0.773344 0.504114 0.055 Uiso 0.4335(19) 1 calc R U P B -1
 C23 C 0.372(2) 0.6810(15) 0.5477(8) 0.061(3) Uani 0.4335(19) 1 d D U P B -1
 H23A H 0.422574 0.643109 0.505171 0.091 Uiso 0.4335(19) 1 calc R U P B -1
 H23B H 0.310479 0.601445 0.580013 0.091 Uiso 0.4335(19) 1 calc R U P B -1
 H23C H 0.454059 0.713865 0.576504 0.091 Uiso 0.4335(19) 1 calc R U P B -1
 C24 C 0.2866(12) 1.0394(15) 0.4031(6) 0.030(3) Uani 0.4335(19) 1 d D U P B -1
 H24A H 0.278477 1.123491 0.430031 0.037 Uiso 0.4335(19) 1 calc R U P B -1
 H24B H 0.178995 1.021104 0.387665 0.037 Uiso 0.4335(19) 1 calc R U P B -1
 C25 C 0.4022(13) 1.0772(12) 0.3337(5) 0.044(3) Uani 0.4335(19) 1 d D U P B -1
 H25A H 0.356903 1.159571 0.297277 0.066 Uiso 0.4335(19) 1 calc R U P B -1
 H25B H 0.418802 0.989289 0.310803 0.066 Uiso 0.4335(19) 1 calc R U P B -1
 H25C H 0.504483 1.106935 0.348907 0.066 Uiso 0.4335(19) 1 calc R U P B -1
 N21 N 0.3503(17) 0.9031(15) 0.4525(8) 0.026(3) Uani 0.4335(19) 1 d D U P B -1
 H21 H 0.375429 0.832501 0.417841 0.032 Uiso 0.4335(19) 1 calc R U P B -1
 C31 C 0.5011(14) 1.0305(16) 0.5369(7) 0.044(3) Uani 0.4335(19) 1 d D U P B -1
 H31A H 0.457907 0.974710 0.585889 0.053 Uiso 0.4335(19) 1 calc R U P B -1
 H31B H 0.428761 1.116962 0.520048 0.053 Uiso 0.4335(19) 1 calc R U P B -1
 C32 C 0.773(2) 1.1480(13) 0.4789(9) 0.045(3) Uani 0.4335(19) 1 d D U P B -1
 H32A H 0.881932 1.149440 0.497069 0.054 Uiso 0.4335(19) 1 calc R U P B -1
 H32B H 0.776809 1.077229 0.444151 0.054 Uiso 0.4335(19) 1 calc R U P B -1
 C33 C 0.7383(13) 1.2965(11) 0.4349(5) 0.046(3) Uani 0.4335(19) 1 d D U P B -1
 H33A H 0.652589 1.290349 0.401358 0.069 Uiso 0.4335(19) 1 calc R U P B -1
 H33B H 0.834184 1.334952 0.405092 0.069 Uiso 0.4335(19) 1 calc R U P B -1
 H33C H 0.704748 1.363831 0.468809 0.069 Uiso 0.4335(19) 1 calc R U P B -1
 C34 C 0.7744(14) 0.9579(16) 0.5815(7) 0.042(3) Uani 0.4335(19) 1 d D U P B -1
 H34A H 0.789827 0.884410 0.548387 0.050 Uiso 0.4335(19) 1 calc R U P B -1
 H34B H 0.879886 0.998305 0.587290 0.050 Uiso 0.4335(19) 1 calc R U P B -1
 C35 C 0.7065(17) 0.8802(16) 0.6578(7) 0.062(4) Uani 0.4335(19) 1 d D U P B -1
 H35A H 0.623911 0.811352 0.651124 0.094 Uiso 0.4335(19) 1 calc R U P B -1
 H35B H 0.659763 0.954905 0.684914 0.094 Uiso 0.4335(19) 1 calc R U P B -1
 H35C H 0.791855 0.824244 0.686493 0.094 Uiso 0.4335(19) 1 calc R U P B -1
 N31 N 0.6651(16) 1.0842(15) 0.5453(7) 0.025(3) Uani 0.4335(19) 1 d D U P B -1
 H31 H 0.654482 1.158606 0.578853 0.030 Uiso 0.4335(19) 1 calc R U P B -1
 C41 C 0.553(3) 0.934(2) 0.4965(11) 0.049(5) Uani 0.133(4) 1 d D U P B 3
 H41A H 0.662826 0.968418 0.481690 0.059 Uiso 0.133(4) 1 calc R U P B 3
 H41B H 0.515548 0.886814 0.456382 0.059 Uiso 0.133(4) 1 calc R U P B 3
 C42 C 0.401(3) 0.737(3) 0.5884(17) 0.059(6) Uani 0.133(4) 1 d D U P B 3
 H42A H 0.407223 0.668885 0.637762 0.070 Uiso 0.133(4) 1 calc R U P B 3
 H42B H 0.312135 0.809971 0.592033 0.070 Uiso 0.133(4) 1 calc R U P B 3
 C43 C 0.369(6) 0.650(6) 0.530(3) 0.062(9) Uani 0.133(4) 1 d D U P B 3
 H43A H 0.394335 0.710285 0.480138 0.093 Uiso 0.133(4) 1 calc R U P B 3
 H43B H 0.255738 0.624261 0.534065 0.093 Uiso 0.133(4) 1 calc R U P B 3
 H43C H 0.434679 0.558449 0.537564 0.093 Uiso 0.133(4) 1 calc R U P B 3
 C44 C 0.600(3) 0.868(4) 0.6391(14) 0.058(6) Uani 0.133(4) 1 d D U P B 3
 H44A H 0.539487 0.960382 0.643845 0.070 Uiso 0.133(4) 1 calc R U P B 3
 H44B H 0.569570 0.789438 0.683140 0.070 Uiso 0.133(4) 1 calc R U P B 3
 C45 C 0.776(3) 0.895(5) 0.639(2) 0.043(7) Uani 0.133(4) 1 d D U P B 3
 H45A H 0.797649 0.938702 0.682027 0.064 Uiso 0.133(4) 1 calc R U P B 3
 H45B H 0.808662 0.964182 0.592345 0.064 Uiso 0.133(4) 1 calc R U P B 3
 H45C H 0.835347 0.800317 0.641654 0.064 Uiso 0.133(4) 1 calc R U P B 3
 N41 N 0.556(3) 0.8193(17) 0.5686(11) 0.064(5) Uani 0.133(4) 1 d D U P B 3
 H41 H 0.637867 0.742286 0.559601 0.076 Uiso 0.133(4) 1 calc R U P B 3

loop_
  _atom_site_aniso_label
  _atom_site_aniso_U_11
  _atom_site_aniso_U_22
  _atom_site_aniso_U_33
  _atom_site_aniso_U_23
  _atom_site_aniso_U_13
  _atom_site_aniso_U_12
 B1 0.0173(19) 0.035(3) 0.036(2) -0.019(2) 0.0007(16) -0.0007(16)
 B2 0.023(2) 0.018(2) 0.025(2) -0.0062(17) 0.0024(15) -0.0012(15)
 B3 0.0201(19) 0.023(2) 0.023(2) -0.0095(17) 0.0012(15) 0.0004(15)
 B4 0.019(2) 0.036(3) 0.046(3) -0.026(2) 0.0024(18) -0.0029(17)
 B5 0.023(2) 0.045(3) 0.033(2) -0.022(2) 0.0015(17) -0.0033(18)
 O1 0.0203(12) 0.0286(15) 0.0310(13) -0.0167(11) 0.0034(9) -0.0032(10)
 O2 0.0178(12) 0.0372(16) 0.0452(15) -0.0271(12) 0.0033(10) -0.0026(10)
 O3 0.0194(12) 0.0378(16) 0.0365(14) -0.0243(12) 0.0024(10) -0.0026(10)
 O4 0.0189(12) 0.0323(16) 0.0410(15) -0.0183(12) 0.0062(10) -0.0023(10)
 O5 0.0236(13) 0.0392(17) 0.0446(16) -0.0220(13) 0.0059(11) 0.0014(11)
 O6 0.0217(12) 0.0395(16) 0.0285(13) -0.0145(11) 0.0051(10) -0.0003(10)
 O7 0.0169(12) 0.0423(17) 0.0580(17) -0.0344(14) 0.0052(11) -0.0043(11)
 O8 0.0180(12) 0.0412(17) 0.0445(16) -0.0265(13) -0.0002(10) 0.0018(11)
 O9 0.0281(14) 0.0375(18) 0.0563(18) -0.0168(14) 0.0138(12) 0.0041(12)
 O10 0.0310(15) 0.050(2) 0.0377(15) -0.0137(13) 0.0129(11) 0.0027(12)
 B11 0.020(2) 0.034(3) 0.039(2) -0.021(2) 0.0026(17) -0.0018(17)
 B12 0.020(2) 0.034(3) 0.042(3) -0.021(2) -0.0008(17) -0.0021(17)
 B13 0.017(2) 0.037(3) 0.039(3) -0.022(2) -0.0005(17) -0.0043(17)
 B14 0.022(2) 0.024(2) 0.028(2) -0.0084(18) 0.0032(15) -0.0001(16)
 B15 0.023(2) 0.024(2) 0.029(2) -0.0110(18) 0.0023(16) -0.0023(16)
 O11 0.0232(12) 0.0265(15) 0.0436(15) -0.0167(12) 0.0071(10) -0.0033(10)
 O12 0.0221(12) 0.0325(16) 0.0435(16) -0.0190(12) 0.0053(10) 0.0030(10)
 O13 0.0225(12) 0.0330(16) 0.0390(14) -0.0168(12) 0.0054(10) -0.0001(10)
 O14 0.0195(12) 0.0263(15) 0.0380(14) -0.0189(11) 0.0031(10) -0.0034(10)
 O15 0.0194(12) 0.0388(17) 0.0466(15) -0.0288(13) 0.0020(10) -0.0008(10)
 O16 0.0214(12) 0.0366(17) 0.0518(16) -0.0313(13) 0.0023(10) -0.0034(10)
 O17 0.0312(14) 0.0353(17) 0.0447(16) -0.0148(13) 0.0062(11) 0.0067(12)
 O18 0.0320(14) 0.0340(18) 0.0429(16) -0.0143(12) 0.0086(12) 0.0055(11)
 O19 0.0189(13) 0.0540(19) 0.0617(18) -0.0422(15) 0.0008(12) -0.0006(12)
 O20 0.0209(13) 0.0370(17) 0.0469(16) -0.0266(12) 0.0019(11) -0.0034(11)
 C1 0.024(4) 0.030(5) 0.020(5) -0.015(5) 0.005(3) -0.001(3)
 C2 0.029(4) 0.015(4) 0.032(5) -0.014(3) 0.002(3) -0.003(3)
 C3 0.052(6) 0.030(7) 0.045(6) -0.007(7) -0.014(4) -0.016(6)
 C4 0.023(4) 0.035(6) 0.027(4) -0.015(4) -0.001(3) 0.001(3)
 C5 0.036(5) 0.041(7) 0.042(7) -0.021(7) -0.006(5) 0.001(4)
 N1 0.023(4) 0.026(4) 0.026(3) -0.013(3) 0.005(3) -0.003(3)
 C11 0.027(4) 0.041(6) 0.026(5) -0.008(5) 0.004(3) 0.000(3)
 C12 0.040(4) 0.034(5) 0.041(5) -0.019(4) -0.003(3) -0.003(3)
 C13 0.037(5) 0.059(9) 0.048(6) -0.025(8) -0.002(4) -0.012(6)
 C14 0.038(4) 0.030(5) 0.035(4) -0.011(4) 0.000(3) -0.001(3)
 C15 0.054(6) 0.039(6) 0.047(7) -0.004(7) -0.014(6) -0.013(4)
 N11 0.026(3) 0.039(4) 0.034(4) -0.019(3) 0.001(3) -0.003(3)
 C21 0.022(5) 0.054(7) 0.063(6) -0.040(5) -0.022(4) 0.017(4)
 C22 0.077(7) 0.041(8) 0.028(5) -0.028(5) 0.012(5) -0.026(5)
 C23 0.109(10) 0.032(7) 0.045(9) -0.016(5) 0.002(7) -0.019(6)
 C24 0.025(6) 0.030(5) 0.043(6) -0.020(4) -0.014(4) 0.010(5)
 C25 0.066(7) 0.029(6) 0.038(5) -0.012(4) 0.002(5) 0.011(5)
 N21 0.018(5) 0.025(6) 0.041(6) -0.017(4) -0.004(4) -0.001(4)
 C31 0.029(5) 0.050(7) 0.067(7) -0.042(6) -0.010(5) 0.012(4)
 C32 0.072(8) 0.028(6) 0.042(6) -0.025(5) 0.024(5) -0.033(5)
 C33 0.069(7) 0.039(6) 0.033(6) -0.013(5) 0.003(5) -0.038(5)
 C34 0.042(7) 0.025(6) 0.065(7) -0.023(5) -0.016(5) 0.010(5)
 C35 0.090(11) 0.033(7) 0.065(8) -0.004(6) -0.021(8) -0.015(8)
 N31 0.027(5) 0.025(6) 0.029(5) -0.019(4) 0.008(4) 0.002(4)
 C41 0.037(10) 0.053(10) 0.062(9) -0.026(8) -0.012(9) 0.021(9)
 C42 0.069(10) 0.058(12) 0.053(11) -0.023(9) 0.006(10) 0.003(9)
 C43 0.079(18) 0.059(18) 0.051(16) -0.016(14) -0.015(15) 0.000(14)
 C44 0.055(11) 0.056(12) 0.063(10) -0.009(10) -0.009(10) 0.013(10)
 C45 0.050(12) 0.050(18) 0.027(15) -0.006(14) -0.001(12) 0.018(12)
 N41 0.059(8) 0.061(9) 0.074(8) -0.019(7) -0.011(7) 0.008(7)

_geom_special_details
;
 All esds (except the esd in the dihedral angle between two l.s. planes)
 are estimated using the full covariance matrix.  The cell esds are taken
 into account individually in the estimation of esds in distances, angles
 and torsion angles; correlations between esds in cell parameters are only
 used when they are defined by crystal symmetry.  An approximate (isotropic)
 treatment of cell esds is used for estimating esds involving l.s. planes.
;
loop_
  _geom_bond_atom_site_label_1
  _geom_bond_atom_site_label_2
  _geom_bond_distance
  _geom_bond_site_symmetry_2
  _geom_bond_publ_flag
 B1 O1 1.479(4) . ?
 B1 O3 1.448(4) . ?
 B1 O4 1.468(5) . ?
 B1 O6 1.476(5) . ?
 B2 O1 1.335(4) . ?
 B2 O2 1.381(4) . ?
 B2 O7 1.364(4) . ?
 B3 O2 1.377(4) . ?
 B3 O3 1.344(4) . ?
 B3 O8 1.354(4) . ?
 B4 O4 1.342(4) . ?
 B4 O5 1.383(5) . ?
 B4 O9 1.366(5) . ?
 B5 O5 1.388(5) . ?
 B5 O6 1.345(4) . ?
 B5 O10 1.365(5) . ?
 O7 H7 0.8400 . ?
 O8 H8 0.8400 . ?
 O9 H9 0.8400 . ?
 O10 H10 0.8400 . ?
 B11 O11 1.467(5) . ?
 B11 O13 1.473(5) . ?
 B11 O14 1.476(4) . ?
 B11 O16 1.459(4) . ?
 B12 O11 1.352(4) . ?
 B12 O12 1.384(5) . ?
 B12 O17 1.358(5) . ?
 B13 O12 1.380(5) . ?
 B13 O13 1.348(4) . ?
 B13 O18 1.359(5) . ?
 B14 O14 1.347(4) . ?
 B14 O15 1.371(4) . ?
 B14 O19 1.355(4) . ?
 B15 O15 1.378(4) . ?
 B15 O16 1.351(4) . ?
 B15 O20 1.351(4) . ?
 O17 H17 0.8400 . ?
 O18 H18 0.8400 . ?
 O19 H19 0.8400 . ?
 O20 H20 0.8400 . ?
 C1 C1 1.503(12) 2_675 ?
 C1 H1A 0.9900 . ?
 C1 H1B 0.9900 . ?
 C1 N1 1.514(8) . ?
 C2 H2A 0.9900 . ?
 C2 H2B 0.9900 . ?
 C2 C3 1.508(11) . ?
 C2 N1 1.527(8) . ?
 C3 H3A 0.9800 . ?
 C3 H3B 0.9800 . ?
 C3 H3C 0.9800 . ?
 C4 H4A 0.9900 . ?
 C4 H4B 0.9900 . ?
 C4 C5 1.511(10) . ?
 C4 N1 1.517(7) . ?
 C5 H5A 0.9800 . ?
 C5 H5B 0.9800 . ?
 C5 H5C 0.9800 . ?
 N1 H1 1.0000 . ?
 C11 C11 1.496(11) 2_675 ?
 C11 H11A 0.9900 . ?
 C11 H11B 0.9900 . ?
 C11 N11 1.502(8) . ?
 C12 H12A 0.9900 . ?
 C12 H12B 0.9900 . ?
 C12 C13 1.493(10) . ?
 C12 N11 1.523(7) . ?
 C13 H13A 0.9800 . ?
 C13 H13B 0.9800 . ?
 C13 H13C 0.9800 . ?
 C14 H14A 0.9900 . ?
 C14 H14B 0.9900 . ?
 C14 C15 1.502(10) . ?
 C14 N11 1.512(7) . ?
 C15 H15A 0.9800 . ?
 C15 H15B 0.9800 . ?
 C15 H15C 0.9800 . ?
 N11 H11 1.0000 . ?
 C21 H21A 0.9900 . ?
 C21 H21B 0.9900 . ?
 C21 N21 1.509(11) . ?
 C21 C31 1.502(8) . ?
 C22 H22A 0.9900 . ?
 C22 H22B 0.9900 . ?
 C22 C23 1.489(14) . ?
 C22 N21 1.507(11) . ?
 C23 H23A 0.9800 . ?
 C23 H23B 0.9800 . ?
 C23 H23C 0.9800 . ?
 C24 H24A 0.9900 . ?
 C24 H24B 0.9900 . ?
 C24 C25 1.539(10) . ?
 C24 N21 1.487(11) . ?
 C25 H25A 0.9800 . ?
 C25 H25B 0.9800 . ?
 C25 H25C 0.9800 . ?
 N21 H21 1.0000 . ?
 C31 H31A 0.9900 . ?
 C31 H31B 0.9900 . ?
 C31 N31 1.503(11) . ?
 C32 H32A 0.9900 . ?
 C32 H32B 0.9900 . ?
 C32 C33 1.461(12) . ?
 C32 N31 1.503(11) . ?
 C33 H33A 0.9800 . ?
 C33 H33B 0.9800 . ?
 C33 H33C 0.9800 . ?
 C34 H34A 0.9900 . ?
 C34 H34B 0.9900 . ?
 C34 C35 1.516(12) . ?
 C34 N31 1.517(12) . ?
 C35 H35A 0.9800 . ?
 C35 H35B 0.9800 . ?
 C35 H35C 0.9800 . ?
 N31 H31 1.0000 . ?
 C41 C41 1.50(2) 2_676 ?
 C41 H41A 0.9900 . ?
 C41 H41B 0.9900 . ?
 C41 N41 1.507(15) . ?
 C42 H42A 0.9900 . ?
 C42 H42B 0.9900 . ?
 C42 C43 1.490(17) . ?
 C42 N41 1.514(15) . ?
 C43 H43A 0.9800 . ?
 C43 H43B 0.9800 . ?
 C43 H43C 0.9800 . ?
 C44 H44A 0.9900 . ?
 C44 H44B 0.9900 . ?
 C44 C45 1.505(16) . ?
 C44 N41 1.507(15) . ?
 C45 H45A 0.9800 . ?
 C45 H45B 0.9800 . ?
 C45 H45C 0.9800 . ?
 N41 H41 1.0000 . ?

loop_
  _geom_angle_atom_site_label_1
  _geom_angle_atom_site_label_2
  _geom_angle_atom_site_label_3
  _geom_angle
  _geom_angle_site_symmetry_1
  _geom_angle_site_symmetry_3
  _geom_angle_publ_flag
 O3 B1 O1 111.9(3) . . ?
 O3 B1 O4 110.1(3) . . ?
 O3 B1 O6 110.1(3) . . ?
 O4 B1 O1 107.2(3) . . ?
 O4 B1 O6 110.5(3) . . ?
 O6 B1 O1 107.0(3) . . ?
 O1 B2 O2 121.1(3) . . ?
 O1 B2 O7 122.2(3) . . ?
 O7 B2 O2 116.7(3) . . ?
 O3 B3 O2 120.8(3) . . ?
 O3 B3 O8 120.0(3) . . ?
 O8 B3 O2 119.2(3) . . ?
 O4 B4 O5 121.9(4) . . ?
 O4 B4 O9 122.2(4) . . ?
 O9 B4 O5 115.9(3) . . ?
 O6 B5 O5 121.7(4) . . ?
 O6 B5 O10 122.0(4) . . ?
 O10 B5 O5 116.3(3) . . ?
 B2 O1 B1 122.8(3) . . ?
 B3 O2 B2 119.8(2) . . ?
 B3 O3 B1 123.6(3) . . ?
 B4 O4 B1 123.5(3) . . ?
 B4 O5 B5 118.0(3) . . ?
 B5 O6 B1 123.3(3) . . ?
 B2 O7 H7 109.5 . . ?
 B3 O8 H8 109.5 . . ?
 B4 O9 H9 109.5 . . ?
 B5 O10 H10 109.5 . . ?
 O11 B11 O13 111.2(3) . . ?
 O11 B11 O14 107.9(3) . . ?
 O13 B11 O14 107.4(3) . . ?
 O16 B11 O11 109.7(3) . . ?
 O16 B11 O13 109.1(3) . . ?
 O16 B11 O14 111.5(3) . . ?
 O11 B12 O12 121.3(4) . . ?
 O11 B12 O17 122.9(4) . . ?
 O17 B12 O12 115.8(3) . . ?
 O13 B13 O12 120.7(3) . . ?
 O13 B13 O18 122.8(4) . . ?
 O18 B13 O12 116.5(3) . . ?
 O14 B14 O15 120.8(3) . . ?
 O14 B14 O19 121.8(3) . . ?
 O19 B14 O15 117.4(3) . . ?
 O16 B15 O15 120.4(3) . . ?
 O20 B15 O15 120.8(3) . . ?
 O20 B15 O16 118.8(3) . . ?
 B12 O11 B11 123.0(3) . . ?
 B13 O12 B12 119.6(3) . . ?
 B13 O13 B11 123.7(3) . . ?
 B14 O14 B11 123.0(3) . . ?
 B14 O15 B15 120.4(3) . . ?
 B15 O16 B11 123.5(3) . . ?
 B12 O17 H17 109.5 . . ?
 B13 O18 H18 109.5 . . ?
 B14 O19 H19 109.5 . . ?
 B15 O20 H20 109.5 . . ?
 C1 C1 H1A 109.5 2_675 . ?
 C1 C1 H1B 109.5 2_675 . ?
 C1 C1 N1 110.6(8) 2_675 . ?
 H1A C1 H1B 108.1 . . ?
 N1 C1 H1A 109.5 . . ?
 N1 C1 H1B 109.5 . . ?
 H2A C2 H2B 108.0 . . ?
 C3 C2 H2A 109.4 . . ?
 C3 C2 H2B 109.4 . . ?
 C3 C2 N1 111.1(6) . . ?
 N1 C2 H2A 109.4 . . ?
 N1 C2 H2B 109.4 . . ?
 C2 C3 H3A 109.5 . . ?
 C2 C3 H3B 109.5 . . ?
 C2 C3 H3C 109.5 . . ?
 H3A C3 H3B 109.5 . . ?
 H3A C3 H3C 109.5 . . ?
 H3B C3 H3C 109.5 . . ?
 H4A C4 H4B 107.7 . . ?
 C5 C4 H4A 108.8 . . ?
 C5 C4 H4B 108.8 . . ?
 C5 C4 N1 113.8(6) . . ?
 N1 C4 H4A 108.8 . . ?
 N1 C4 H4B 108.8 . . ?
 C4 C5 H5A 109.5 . . ?
 C4 C5 H5B 109.5 . . ?
 C4 C5 H5C 109.5 . . ?
 H5A C5 H5B 109.5 . . ?
 H5A C5 H5C 109.5 . . ?
 H5B C5 H5C 109.5 . . ?
 C1 N1 C2 109.5(5) . . ?
 C1 N1 C4 115.1(5) . . ?
 C1 N1 H1 106.7 . . ?
 C2 N1 H1 106.7 . . ?
 C4 N1 C2 111.8(5) . . ?
 C4 N1 H1 106.7 . . ?
 C11 C11 H11A 109.2 2_675 . ?
 C11 C11 H11B 109.2 2_675 . ?
 C11 C11 N11 111.9(8) 2_675 . ?
 H11A C11 H11B 107.9 . . ?
 N11 C11 H11A 109.2 . . ?
 N11 C11 H11B 109.2 . . ?
 H12A C12 H12B 107.7 . . ?
 C13 C12 H12A 108.9 . . ?
 C13 C12 H12B 108.9 . . ?
 C13 C12 N11 113.4(6) . . ?
 N11 C12 H12A 108.9 . . ?
 N11 C12 H12B 108.9 . . ?
 C12 C13 H13A 109.5 . . ?
 C12 C13 H13B 109.5 . . ?
 C12 C13 H13C 109.5 . . ?
 H13A C13 H13B 109.5 . . ?
 H13A C13 H13C 109.5 . . ?
 H13B C13 H13C 109.5 . . ?
 H14A C14 H14B 108.0 . . ?
 C15 C14 H14A 109.3 . . ?
 C15 C14 H14B 109.3 . . ?
 C15 C14 N11 111.4(6) . . ?
 N11 C14 H14A 109.3 . . ?
 N11 C14 H14B 109.3 . . ?
 C14 C15 H15A 109.5 . . ?
 C14 C15 H15B 109.5 . . ?
 C14 C15 H15C 109.5 . . ?
 H15A C15 H15B 109.5 . . ?
 H15A C15 H15C 109.5 . . ?
 H15B C15 H15C 109.5 . . ?
 C11 N11 C12 115.5(5) . . ?
 C11 N11 C14 109.5(5) . . ?
 C11 N11 H11 106.4 . . ?
 C12 N11 H11 106.4 . . ?
 C14 N11 C12 111.9(5) . . ?
 C14 N11 H11 106.4 . . ?
 H21A C21 H21B 107.7 . . ?
 N21 C21 H21A 108.8 . . ?
 N21 C21 H21B 108.8 . . ?
 C31 C21 H21A 108.8 . . ?
 C31 C21 H21B 108.8 . . ?
 C31 C21 N21 113.6(9) . . ?
 H22A C22 H22B 108.6 . . ?
 C23 C22 H22A 110.4 . . ?
 C23 C22 H22B 110.4 . . ?
 C23 C22 N21 106.5(10) . . ?
 N21 C22 H22A 110.4 . . ?
 N21 C22 H22B 110.4 . . ?
 C22 C23 H23A 109.5 . . ?
 C22 C23 H23B 109.5 . . ?
 C22 C23 H23C 109.5 . . ?
 H23A C23 H23B 109.5 . . ?
 H23A C23 H23C 109.5 . . ?
 H23B C23 H23C 109.5 . . ?
 H24A C24 H24B 108.5 . . ?
 C25 C24 H24A 110.2 . . ?
 C25 C24 H24B 110.2 . . ?
 N21 C24 H24A 110.2 . . ?
 N21 C24 H24B 110.2 . . ?
 N21 C24 C25 107.6(9) . . ?
 C24 C25 H25A 109.5 . . ?
 C24 C25 H25B 109.5 . . ?
 C24 C25 H25C 109.5 . . ?
 H25A C25 H25B 109.5 . . ?
 H25A C25 H25C 109.5 . . ?
 H25B C25 H25C 109.5 . . ?
 C21 N21 H21 104.1 . . ?
 C22 N21 C21 104.9(10) . . ?
 C22 N21 H21 104.1 . . ?
 C24 N21 C21 111.2(9) . . ?
 C24 N21 C22 126.3(13) . . ?
 C24 N21 H21 104.1 . . ?
 C21 C31 H31A 109.8 . . ?
 C21 C31 H31B 109.8 . . ?
 C21 C31 N31 109.2(9) . . ?
 H31A C31 H31B 108.3 . . ?
 N31 C31 H31A 109.8 . . ?
 N31 C31 H31B 109.8 . . ?
 H32A C32 H32B 106.9 . . ?
 C33 C32 H32A 107.4 . . ?
 C33 C32 H32B 107.4 . . ?
 C33 C32 N31 119.7(10) . . ?
 N31 C32 H32A 107.4 . . ?
 N31 C32 H32B 107.4 . . ?
 C32 C33 H33A 109.5 . . ?
 C32 C33 H33B 109.5 . . ?
 C32 C33 H33C 109.5 . . ?
 H33A C33 H33B 109.5 . . ?
 H33A C33 H33C 109.5 . . ?
 H33B C33 H33C 109.5 . . ?
 H34A C34 H34B 108.0 . . ?
 C35 C34 H34A 109.3 . . ?
 C35 C34 H34B 109.3 . . ?
 C35 C34 N31 111.6(10) . . ?
 N31 C34 H34A 109.3 . . ?
 N31 C34 H34B 109.3 . . ?
 C34 C35 H35A 109.5 . . ?
 C34 C35 H35B 109.5 . . ?
 C34 C35 H35C 109.5 . . ?
 H35A C35 H35B 109.5 . . ?
 H35A C35 H35C 109.5 . . ?
 H35B C35 H35C 109.5 . . ?
 C31 N31 C34 111.9(10) . . ?
 C31 N31 H31 107.8 . . ?
 C32 N31 C31 122.3(11) . . ?
 C32 N31 C34 98.2(11) . . ?
 C32 N31 H31 107.8 . . ?
 C34 N31 H31 107.8 . . ?
 C41 C41 H41A 109.1 2_676 . ?
 C41 C41 H41B 109.1 2_676 . ?
 C41 C41 N41 112.5(16) 2_676 . ?
 H41A C41 H41B 107.8 . . ?
 N41 C41 H41A 109.1 . . ?
 N41 C41 H41B 109.1 . . ?
 H42A C42 H42B 108.1 . . ?
 C43 C42 H42A 109.6 . . ?
 C43 C42 H42B 109.6 . . ?
 C43 C42 N41 110(2) . . ?
 N41 C42 H42A 109.6 . . ?
 N41 C42 H42B 109.6 . . ?
 C42 C43 H43A 109.5 . . ?
 C42 C43 H43B 109.5 . . ?
 C42 C43 H43C 109.5 . . ?
 H43A C43 H43B 109.5 . . ?
 H43A C43 H43C 109.5 . . ?
 H43B C43 H43C 109.5 . . ?
 H44A C44 H44B 107.9 . . ?
 C45 C44 H44A 109.2 . . ?
 C45 C44 H44B 109.2 . . ?
 C45 C44 N41 112(2) . . ?
 N41 C44 H44A 109.2 . . ?
 N41 C44 H44B 109.2 . . ?
 C44 C45 H45A 109.5 . . ?
 C44 C45 H45B 109.5 . . ?
 C44 C45 H45C 109.5 . . ?
 H45A C45 H45B 109.5 . . ?
 H45A C45 H45C 109.5 . . ?
 H45B C45 H45C 109.5 . . ?
 C41 N41 C42 113.4(17) . . ?
 C41 N41 H41 105.9 . . ?
 C42 N41 H41 105.9 . . ?
 C44 N41 C41 118.7(18) . . ?
 C44 N41 C42 106.0(16) . . ?
 C44 N41 H41 105.9 . . ?

loop_
  _geom_hbond_atom_site_label_D
  _geom_hbond_atom_site_label_H
  _geom_hbond_atom_site_label_A
  _geom_hbond_distance_DH
  _geom_hbond_distance_HA
  _geom_hbond_distance_DA
  _geom_hbond_angle_DHA
  _geom_hbond_site_symmetry_A
  _geom_hbond_publ_flag
 O7 H7 O14 0.84 1.87 2.709(3) 174.8 1_655 yes
 O8 H8 O19 0.84 2.00 2.831(3) 172.8 . yes
 O9 H9 O11 0.84 1.99 2.833(3) 178.8 1_645 yes
 O10 H10 O6 0.84 1.95 2.786(4) 175.2 2_765 yes
 O17 H17 O4 0.84 1.91 2.745(3) 177.6 1_465 yes
 O18 H18 O13 0.84 1.92 2.763(3) 175.8 2_566 yes
 O19 H19 O1 0.84 1.85 2.692(3) 176.5 1_455 yes
 O20 H20 O7 0.84 1.97 2.806(3) 174.4 . yes
 N1 H1 O9 1.00 1.99 2.892(6) 149.3 1_465 yes
 N11 H11 O5 1.00 2.45 3.351(6) 149.1 2_765 yes
 N11 H11 O10 1.00 2.14 2.962(6) 138.6 2_765 yes
 N41 H41 O18 1.00 2.02 2.99(2) 163.1 1_655 yes

loop_
  _geom_torsion_atom_site_label_1
  _geom_torsion_atom_site_label_2
  _geom_torsion_atom_site_label_3
  _geom_torsion_atom_site_label_4
  _geom_torsion
  _geom_torsion_site_symmetry_1
  _geom_torsion_site_symmetry_2
  _geom_torsion_site_symmetry_3
  _geom_torsion_site_symmetry_4
  _geom_torsion_publ_flag
 O1 B1 O3 B3 -0.9(5) . . . . ?
 O1 B1 O4 B4 -126.4(3) . . . . ?
 O1 B1 O6 B5 126.5(3) . . . . ?
 O1 B2 O2 B3 -0.8(5) . . . . ?
 O2 B2 O1 B1 0.3(5) . . . . ?
 O2 B3 O3 B1 0.5(5) . . . . ?
 O3 B1 O1 B2 0.5(5) . . . . ?
 O3 B1 O4 B4 111.6(3) . . . . ?
 O3 B1 O6 B5 -111.6(3) . . . . ?
 O3 B3 O2 B2 0.4(5) . . . . ?
 O4 B1 O1 B2 -120.3(3) . . . . ?
 O4 B1 O3 B3 118.2(3) . . . . ?
 O4 B1 O6 B5 10.2(4) . . . . ?
 O4 B4 O5 B5 6.1(5) . . . . ?
 O5 B4 O4 B1 2.6(5) . . . . ?
 O5 B5 O6 B1 -2.7(5) . . . . ?
 O6 B1 O1 B2 121.2(3) . . . . ?
 O6 B1 O3 B3 -119.7(3) . . . . ?
 O6 B1 O4 B4 -10.2(4) . . . . ?
 O6 B5 O5 B4 -6.1(5) . . . . ?
 O7 B2 O1 B1 -179.2(3) . . . . ?
 O7 B2 O2 B3 178.8(3) . . . . ?
 O8 B3 O2 B2 -178.3(3) . . . . ?
 O8 B3 O3 B1 179.1(3) . . . . ?
 O9 B4 O4 B1 -177.4(3) . . . . ?
 O9 B4 O5 B5 -173.9(3) . . . . ?
 O10 B5 O5 B4 173.0(3) . . . . ?
 O10 B5 O6 B1 178.3(3) . . . . ?
 O11 B11 O13 B13 -7.6(4) . . . . ?
 O11 B11 O14 B14 126.7(3) . . . . ?
 O11 B11 O16 B15 -124.9(3) . . . . ?
 O11 B12 O12 B13 -3.6(5) . . . . ?
 O12 B12 O11 B11 -2.0(5) . . . . ?
 O12 B13 O13 B11 2.9(5) . . . . ?
 O13 B11 O11 B12 7.1(4) . . . . ?
 O13 B11 O14 B14 -113.3(3) . . . . ?
 O13 B11 O16 B15 113.0(3) . . . . ?
 O13 B13 O12 B12 3.2(5) . . . . ?
 O14 B11 O11 B12 124.6(3) . . . . ?
 O14 B11 O13 B13 -125.4(3) . . . . ?
 O14 B11 O16 B15 -5.4(5) . . . . ?
 O14 B14 O15 B15 -2.9(5) . . . . ?
 O15 B14 O14 B11 -2.4(5) . . . . ?
 O15 B15 O16 B11 0.9(5) . . . . ?
 O16 B11 O11 B12 -113.7(3) . . . . ?
 O16 B11 O13 B13 113.6(3) . . . . ?
 O16 B11 O14 B14 6.2(5) . . . . ?
 O16 B15 O15 B14 3.6(5) . . . . ?
 O17 B12 O11 B11 175.4(3) . . . . ?
 O17 B12 O12 B13 178.8(3) . . . . ?
 O18 B13 O12 B12 -178.6(3) . . . . ?
 O18 B13 O13 B11 -175.2(3) . . . . ?
 O19 B14 O14 B11 178.9(3) . . . . ?
 O19 B14 O15 B15 175.9(3) . . . . ?
 O20 B15 O15 B14 -176.3(3) . . . . ?
 O20 B15 O16 B11 -179.1(3) . . . . ?
 C1 C1 N1 C2 179.9(7) 2_675 . . . ?
 C1 C1 N1 C4 -53.2(9) 2_675 . . . ?
 C3 C2 N1 C1 -72.4(9) . . . . ?
 C3 C2 N1 C4 158.8(8) . . . . ?
 C5 C4 N1 C1 -55.4(10) . . . . ?
 C5 C4 N1 C2 70.3(9) . . . . ?
 C11 C11 N11 C12 -55.8(9) 2_675 . . . ?
 C11 C11 N11 C14 176.9(7) 2_675 . . . ?
 C13 C12 N11 C11 -56.1(9) . . . . ?
 C13 C12 N11 C14 70.1(9) . . . . ?
 C15 C14 N11 C11 -74.3(9) . . . . ?
 C15 C14 N11 C12 156.3(8) . . . . ?
 C21 C31 N31 C32 48.3(16) . . . . ?
 C21 C31 N31 C34 -67.6(13) . . . . ?
 C23 C22 N21 C21 -51.9(16) . . . . ?
 C23 C22 N21 C24 176.7(12) . . . . ?
 C25 C24 N21 C21 63.1(15) . . . . ?
 C25 C24 N21 C22 -168.0(13) . . . . ?
 N21 C21 C31 N31 -164.9(13) . . . . ?
 C31 C21 N21 C22 -68.5(14) . . . . ?
 C31 C21 N21 C24 71.0(15) . . . . ?
 C33 C32 N31 C31 72(2) . . . . ?
 C33 C32 N31 C34 -165.1(15) . . . . ?
 C35 C34 N31 C31 -57.4(16) . . . . ?
 C35 C34 N31 C32 172.8(13) . . . . ?
 C41 C41 N41 C42 70(4) 2_676 . . . ?
 C41 C41 N41 C44 -55(4) 2_676 . . . ?
 C43 C42 N41 C41 63(4) . . . . ?
 C43 C42 N41 C44 -165(3) . . . . ?
 C45 C44 N41 C41 -74(4) . . . . ?
 C45 C44 N41 C42 157(3) . . . . ?

_shelx_res_file
;
TITL ros1b_a.res in P-1
    ros1b.res
    created by SHELXL-2018/3 at 14:10:19 on 25-Nov-2019
REM Old TITL ros1b_b.res in P1
REM SHELXT solution in P-1: R1 0.295, Rweak 0.029, Alpha 0.066
REM <I/s> 0.000 for 0 systematic absences, Orientation as input
REM Formula found by SHELXT: C13 B2 N12 O20
CELL 0.71075 8.3998 9.1406 18.2066 78.439 86.81 88.118
ZERR 2 0.0005 0.0007 0.0013 0.006 0.005 0.006
LATT 1
SFAC C H B N O
UNIT 20 68 20 4 40
EQIV $1 1-X,2-Y,1-Z
EQIV $2 1-X,2-Y,-Z
EQIV $3 1+X,+Y,+Z
EQIV $4 1+X,-1+Y,+Z
EQIV $5 2-X,1-Y,-Z
EQIV $6 -1+X,1+Y,+Z
EQIV $7 -X,1-Y,1-Z
EQIV $8 -1+X,+Y,+Z
DFIX 1.5 C1 C1_$2 C11 C11_$2 C21 C21_$1 C31 C31_$1 C41 C41_$1
SADI N1 C1_$2 N11 C11_$2 N21 C21_$1 N31 C31_$1 N41 C41_$1
SIMU 0.02 0.04 2 C41 C21 N21 C31 C22 C24 N31 C23 C25 C32 C34 C42 C44 N41 =
 C33 C35 C43 C45
RIGU C21 N21 C31 C22 C24 N31 C23 C25 C32 C34 C41 C42 C44 N41 C33 C35 C43 C45

L.S. 32
PLAN  5
SIZE 0.01 0.04 0.1
TEMP -173(2)
HTAB O7 O14_$3
HTAB O8 O19
HTAB O9 O11_$4
HTAB O10 O6_$5
HTAB O17 O4_$6
HTAB O18 O13_$7
HTAB O19 O1_$8
HTAB O20 O7
HTAB N1 O9_$6
HTAB N11 O10_$5
HTAB N11 O5_$5
HTAB N41 O18_$3
CONF
BOND $H
MORE -1
fmap 2
acta
MERG 2
REM <olex2.extras>
REM <HklSrc "%.\\Ros1b.hkl">
REM </olex2.extras>

WGHT    0.075800
FVAR       0.52556   0.47314   0.86699
B1    3    0.888458    0.279726    0.142791    11.00000    0.01727    0.03540 =
         0.03558   -0.01949    0.00066   -0.00067
B2    3    0.769947    0.434143    0.229584    11.00000    0.02289    0.01820 =
         0.02457   -0.00624    0.00244   -0.00123
B3    3    0.598157    0.307326    0.164303    11.00000    0.02005    0.02265 =
         0.02280   -0.00945    0.00121    0.00042
B4    3    1.089279    0.077547    0.136619    11.00000    0.01949    0.03554 =
         0.04585   -0.02582    0.00241   -0.00294
B5    3    1.087978    0.288331    0.036253    11.00000    0.02282    0.04462 =
         0.03279   -0.02217    0.00153   -0.00326
O1    5    0.898621    0.379624    0.196891    11.00000    0.02035    0.02862 =
         0.03100   -0.01666    0.00336   -0.00318
O2    5    0.618199    0.398821    0.214503    11.00000    0.01783    0.03718 =
         0.04524   -0.02709    0.00331   -0.00262
O3    5    0.724772    0.251016    0.129975    11.00000    0.01942    0.03785 =
         0.03651   -0.02431    0.00238   -0.00262
O4    5    0.971853    0.139350    0.174103    11.00000    0.01887    0.03233 =
         0.04100   -0.01830    0.00623   -0.00229
O5    5    1.145593    0.145712    0.065608    11.00000    0.02364    0.03916 =
         0.04463   -0.02203    0.00590    0.00142
O6    5    0.970339    0.354144    0.071993    11.00000    0.02173    0.03947 =
         0.02847   -0.01453    0.00511   -0.00033
O7    5    0.780966    0.527612    0.278725    11.00000    0.01687    0.04233 =
         0.05800   -0.03437    0.00524   -0.00433
AFIX 147
H7    2    0.876993    0.548135    0.281285    11.00000   -1.50000
AFIX   0
O8    5    0.448600    0.276753    0.148520    11.00000    0.01800    0.04118 =
         0.04452   -0.02647   -0.00015    0.00184
AFIX 147
H8    2    0.382029    0.322323    0.172408    11.00000   -1.50000
AFIX   0
O9    5    1.160485   -0.056207    0.166048    11.00000    0.02814    0.03749 =
         0.05626   -0.01683    0.01375    0.00405
AFIX 147
H9    2    1.120567   -0.088542    0.209372    11.00000   -1.50000
AFIX   0
O10   5    1.158934    0.358507   -0.030168    11.00000    0.03096    0.04953 =
         0.03766   -0.01367    0.01291    0.00270
AFIX 147
H10   2    1.115487    0.442976   -0.043778    11.00000   -1.50000
AFIX   0

B11   3    0.099990    0.692266    0.346479    11.00000    0.02030    0.03354 =
         0.03881   -0.02128    0.00265   -0.00179
B12   3   -0.098082    0.899542    0.345675    11.00000    0.02002    0.03411 =
         0.04204   -0.02101   -0.00082   -0.00212
B13   3   -0.101737    0.696979    0.451451    11.00000    0.01745    0.03737 =
         0.03906   -0.02214   -0.00052   -0.00428
B14   3    0.217496    0.511931    0.272192    11.00000    0.02224    0.02410 =
         0.02758   -0.00838    0.00319   -0.00009
B15   3    0.391069    0.644384    0.333755    11.00000    0.02284    0.02412 =
         0.02914   -0.01096    0.00228   -0.00233
O11   5    0.022069    0.832842    0.311184    11.00000    0.02316    0.02650 =
         0.04361   -0.01673    0.00705   -0.00334
O12   5   -0.158613    0.835437    0.416701    11.00000    0.02215    0.03246 =
         0.04354   -0.01902    0.00532    0.00304
O13   5    0.017363    0.626813    0.418508    11.00000    0.02251    0.03298 =
         0.03901   -0.01678    0.00543   -0.00010
O14   5    0.089409    0.585303    0.296123    11.00000    0.01955    0.02627 =
         0.03800   -0.01892    0.00314   -0.00339
O15   5    0.367732    0.537777    0.291821    11.00000    0.01945    0.03881 =
         0.04656   -0.02882    0.00202   -0.00082
O16   5    0.265414    0.719016    0.359547    11.00000    0.02141    0.03665 =
         0.05182   -0.03131    0.00225   -0.00343
O17   5   -0.162682    1.034616    0.314952    11.00000    0.03122    0.03526 =
         0.04474   -0.01480    0.00618    0.00673
AFIX 147
H17   2   -0.120928    1.064130    0.271724    11.00000   -1.50000
AFIX   0
O18   5   -0.168727    0.639124    0.520393    11.00000    0.03201    0.03397 =
         0.04291   -0.01430    0.00865    0.00546
AFIX 147
H18   2   -0.118653    0.560737    0.539220    11.00000   -1.50000
AFIX   0
O19   5    0.204115    0.412386    0.226996    11.00000    0.01886    0.05402 =
         0.06169   -0.04218    0.00083   -0.00057
AFIX 147
H19   2    0.107623    0.404703    0.218791    11.00000   -1.50000
AFIX   0
O20   5    0.539495    0.676346    0.349857    11.00000    0.02092    0.03703 =
         0.04685   -0.02662    0.00195   -0.00340
AFIX 147
H20   2    0.606933    0.629840    0.326884    11.00000   -1.50000
AFIX   0

PART 1
C1    1    0.495737    0.916337    0.007109    21.00000    0.02438    0.02966 =
         0.02013   -0.01498    0.00473   -0.00090
AFIX  23
H1A   2    0.601391    0.873390   -0.004972    21.00000   -1.20000
H1B   2    0.417988    0.887084   -0.025954    21.00000   -1.20000
AFIX   0
C2    1    0.437878    0.684826    0.101057    21.00000    0.02861    0.01522 =
         0.03220   -0.01368    0.00186   -0.00325
AFIX  23
H2A   2    0.536705    0.644432    0.079569    21.00000   -1.20000
H2B   2    0.430673    0.642865    0.155631    21.00000   -1.20000
AFIX   0
C3    1    0.295649    0.637823    0.065108    21.00000    0.05202    0.03011 =
         0.04468   -0.00663   -0.01436   -0.01578
AFIX 137
H3A   2    0.198258    0.682426    0.084263    21.00000   -1.50000
H3B   2    0.288840    0.528731    0.077152    21.00000   -1.50000
H3C   2    0.307410    0.671764    0.010546    21.00000   -1.50000
AFIX   0
C4    1    0.545236    0.904469    0.145538    21.00000    0.02285    0.03453 =
         0.02740   -0.01544   -0.00130    0.00056
AFIX  23
H4A   2    0.528565    1.013336    0.141990    21.00000   -1.20000
H4B   2    0.507134    0.854004    0.196463    21.00000   -1.20000
AFIX   0
C5    1    0.721716    0.871473    0.135575    21.00000    0.03637    0.04111 =
         0.04183   -0.02058   -0.00574    0.00087
AFIX 137
H5A   2    0.738421    0.766614    0.131711    21.00000   -1.50000
H5B   2    0.776204    0.890406    0.178856    21.00000   -1.50000
H5C   2    0.764960    0.936002    0.089696    21.00000   -1.50000
AFIX   0
N1    4    0.445805    0.854723    0.088314    21.00000    0.02254    0.02554 =
         0.02585   -0.01260    0.00489   -0.00255
AFIX  13
H1    2    0.334508    0.892657    0.096444    21.00000   -1.20000
AFIX   0

SAME 0.02 0.04 C1 > N1
PART 0
PART 2
C11   1    0.502974    0.978877    0.041793   -21.00000    0.02677    0.04061 =
         0.02612   -0.00758    0.00446   -0.00024
AFIX  23
H11A  2    0.395605    0.993355    0.064898   -21.00000   -1.20000
H11B  2    0.576772    1.045417    0.059290   -21.00000   -1.20000
AFIX   0
C12   1    0.460670    0.703387    0.040717   -21.00000    0.04047    0.03410 =
         0.04146   -0.01854   -0.00291   -0.00274
AFIX  23
H12A  2    0.474070    0.717785   -0.014616   -21.00000   -1.20000
H12B  2    0.503336    0.602580    0.062220   -21.00000   -1.20000
AFIX   0
C13   1    0.286959    0.711025    0.062439   -21.00000    0.03652    0.05884 =
         0.04787   -0.02474   -0.00232   -0.01194
AFIX 137
H13A  2    0.272565    0.697345    0.117158   -21.00000   -1.50000
H13B  2    0.231914    0.632085    0.045278   -21.00000   -1.50000
H13C  2    0.242412    0.808656    0.039135   -21.00000   -1.50000
AFIX   0
C14   1    0.570001    0.785670    0.151293   -21.00000    0.03837    0.03050 =
         0.03529   -0.01125   -0.00042   -0.00113
AFIX  23
H14A  2    0.472785    0.823851    0.175164   -21.00000   -1.20000
H14B  2    0.576791    0.676163    0.169433   -21.00000   -1.20000
AFIX   0
C15   1    0.714005    0.855907    0.173919   -21.00000    0.05351    0.03864 =
         0.04742   -0.00390   -0.01378   -0.01274
AFIX 137
H15A  2    0.809877    0.822289    0.148272   -21.00000   -1.50000
H15B  2    0.723001    0.826368    0.228349   -21.00000   -1.50000
H15C  2    0.703062    0.964876    0.159895   -21.00000   -1.50000
AFIX   0
N11   4    0.557453    0.819392    0.067036   -21.00000    0.02622    0.03856 =
         0.03374   -0.01866    0.00137   -0.00276
AFIX  13
H11   2    0.668281    0.811462    0.044887   -21.00000   -1.20000
AFIX   0

SAME 0.02 0.04 C1 > N1
PART 0
PART -1
C21   1    0.510370    0.930839    0.480420    30.50000    0.02208    0.05407 =
         0.06276   -0.04032   -0.02160    0.01705
AFIX  23
H21A  2    0.559700    0.833775    0.503382    30.50000   -1.20000
H21B  2    0.580682    0.976729    0.437041    30.50000   -1.20000
AFIX   0
C22   1    0.263191    0.809286    0.519210    30.50000    0.07664    0.04077 =
         0.02770   -0.02751    0.01237   -0.02559
AFIX  23
H22A  2    0.237742    0.868297    0.558557    30.50000   -1.20000
H22B  2    0.162434    0.773344    0.504114    30.50000   -1.20000
AFIX   0
C23   1    0.371858    0.680966    0.547654    30.50000    0.10925    0.03157 =
         0.04477   -0.01582    0.00192   -0.01919
AFIX 137
H23A  2    0.422574    0.643109    0.505171    30.50000   -1.50000
H23B  2    0.310479    0.601445    0.580013    30.50000   -1.50000
H23C  2    0.454059    0.713865    0.576504    30.50000   -1.50000
AFIX   0
C24   1    0.286566    1.039425    0.403068    30.50000    0.02495    0.02979 =
         0.04268   -0.01993   -0.01421    0.00983
AFIX  23
H24A  2    0.278477    1.123491    0.430031    30.50000   -1.20000
H24B  2    0.178995    1.021104    0.387665    30.50000   -1.20000
AFIX   0
C25   1    0.402183    1.077237    0.333719    30.50000    0.06633    0.02913 =
         0.03766   -0.01151    0.00166    0.01079
AFIX 137
H25A  2    0.356903    1.159571    0.297277    30.50000   -1.50000
H25B  2    0.418802    0.989289    0.310803    30.50000   -1.50000
H25C  2    0.504483    1.106935    0.348907    30.50000   -1.50000
AFIX   0
N21   4    0.350345    0.903137    0.452536    30.50000    0.01833    0.02509 =
         0.04079   -0.01710   -0.00441   -0.00104
AFIX  13
H21   2    0.375429    0.832501    0.417841    30.50000   -1.20000
AFIX   0
SAME 0.02 0.04 C1 > N1
C31   1    0.501078    1.030486    0.536926    30.50000    0.02897    0.05028 =
         0.06664   -0.04216   -0.01003    0.01226
AFIX  23
H31A  2    0.457907    0.974710    0.585889    30.50000   -1.20000
H31B  2    0.428761    1.116962    0.520048    30.50000   -1.20000
AFIX   0
C32   1    0.773199    1.148018    0.478885    30.50000    0.07190    0.02796 =
         0.04228   -0.02498    0.02374   -0.03270
AFIX  23
H32A  2    0.881932    1.149440    0.497069    30.50000   -1.20000
H32B  2    0.776809    1.077229    0.444151    30.50000   -1.20000
AFIX   0
C33   1    0.738310    1.296501    0.434920    30.50000    0.06924    0.03931 =
         0.03263   -0.01252    0.00330   -0.03781
AFIX 137
H33A  2    0.652589    1.290349    0.401358    30.50000   -1.50000
H33B  2    0.834184    1.334952    0.405092    30.50000   -1.50000
H33C  2    0.704748    1.363831    0.468809    30.50000   -1.50000
AFIX   0
C34   1    0.774383    0.957919    0.581515    30.50000    0.04229    0.02504 =
         0.06450   -0.02260   -0.01592    0.00957
AFIX  23
H34A  2    0.789827    0.884410    0.548387    30.50000   -1.20000
H34B  2    0.879886    0.998305    0.587290    30.50000   -1.20000
AFIX   0
C35   1    0.706472    0.880234    0.657754    30.50000    0.09050    0.03290 =
         0.06450   -0.00408   -0.02120   -0.01515
AFIX 137
H35A  2    0.623911    0.811352    0.651124    30.50000   -1.50000
H35B  2    0.659763    0.954905    0.684914    30.50000   -1.50000
H35C  2    0.791855    0.824244    0.686493    30.50000   -1.50000
AFIX   0
N31   4    0.665109    1.084154    0.545332    30.50000    0.02663    0.02466 =
         0.02878   -0.01922    0.00849    0.00173
AFIX  13
H31   2    0.654482    1.158606    0.578853    30.50000   -1.20000
AFIX   0
SAME 0.02 0.04 C1 > N1
PART 0
PART 3
C41   1    0.553029    0.933954    0.496538   -31.00000    0.03746    0.05319 =
         0.06204   -0.02613   -0.01170    0.02141
AFIX  23
H41A  2    0.662826    0.968418    0.481690   -31.00000   -1.20000
H41B  2    0.515548    0.886814    0.456382   -31.00000   -1.20000
AFIX   0
C42   1    0.400758    0.737256    0.588371   -31.00000    0.06887    0.05826 =
         0.05288   -0.02321    0.00556    0.00311
AFIX  23
H42A  2    0.407223    0.668885    0.637762   -31.00000   -1.20000
H42B  2    0.312135    0.809971    0.592033   -31.00000   -1.20000
AFIX   0
C43   1    0.368628    0.650105    0.530043   -31.00000    0.07905    0.05947 =
         0.05074   -0.01553   -0.01498    0.00029
AFIX 137
H43A  2    0.394335    0.710285    0.480138   -31.00000   -1.50000
H43B  2    0.255738    0.624261    0.534065   -31.00000   -1.50000
H43C  2    0.434679    0.558449    0.537564   -31.00000   -1.50000
AFIX   0
C44   1    0.599998    0.867693    0.639062   -31.00000    0.05462    0.05625 =
         0.06311   -0.00891   -0.00915    0.01307
AFIX  23
H44A  2    0.539487    0.960382    0.643845   -31.00000   -1.20000
H44B  2    0.569570    0.789438    0.683140   -31.00000   -1.20000
AFIX   0
C45   1    0.775738    0.895115    0.638744   -31.00000    0.05037    0.05011 =
         0.02651   -0.00646   -0.00092    0.01764
AFIX 137
H45A  2    0.797649    0.938702    0.682027   -31.00000   -1.50000
H45B  2    0.808662    0.964182    0.592345   -31.00000   -1.50000
H45C  2    0.835347    0.800317    0.641654   -31.00000   -1.50000
AFIX   0
N41   4    0.555785    0.819332    0.568603   -31.00000    0.05922    0.06081 =
         0.07361   -0.01853   -0.01139    0.00804
AFIX  13
H41   2    0.637867    0.742286    0.559601   -31.00000   -1.20000
AFIX   0
HKLF 4


REM  ros1b_a.res in P-1
REM wR2 = 0.1850, GooF = S = 1.005, Restrained GooF = 1.022 for all data
REM R1 = 0.0748 for 2997 Fo > 4sig(Fo) and 0.1666 for all 6146 data
REM 561 parameters refined using 388 restraints

END

WGHT      0.0758      0.0000

REM Highest difference peak  0.485,  deepest hole -0.255,  1-sigma level  0.069
Q1    1   0.4429  0.8880  0.5984  11.00000  0.05    0.49
Q2    1   0.6782  0.2523  0.1759  11.00000  0.05    0.34
Q3    1  -0.2267  0.8990  0.4332  11.00000  0.05    0.30
Q4    1   0.3165  0.6723  0.3684  11.00000  0.05    0.29
Q5    1   0.5558  0.4185  0.2576  11.00000  0.05    0.29
;
_shelx_res_checksum                45873
_shelx_hkl_file
;
   0   0   2   59.40    3.33
   0   0  -2   64.83    2.68
   0   0   3   41.98    3.69
   0   0  -3   47.98    3.73
   0   0  -3   43.16    2.62
   0   0  -3   46.23    3.05
   0   0  -4  201.77    8.10
   0   0   4  189.99    7.74
   0   0  -4  186.89    5.61
   0   0  -4  190.98    6.45
   0   0   5  182.79    8.38
   0   0  -5  178.09    8.53
   0   0  -5  167.02    6.08
   0   0  -5  189.48    7.26
   0   0   5  164.64    6.74
   0   0   6  660.09   17.02
   0   0  -6  630.81   17.26
   0   0  -6  625.56   11.86
   0   0  -6  655.61   14.35
   0   0   6  631.99   13.61
   0   0  -7   48.27    6.26
   0   0   7   41.74    5.68
   0   0  -7   51.99    4.13
   0   0  -7   49.92    4.69
   0   0   7   46.62    4.49
   0   0  -8 1113.32   26.74
   0   0  -8 1106.06   17.54
   0   0   8 1136.04   21.46
   0   0  -8 1110.28   21.50
   0   0  -9   72.44    5.17
   0   0   9   65.28    5.97
   0   0  10  213.17   10.93
   0   0 -10  202.89    8.44
   0   0 -10  198.50   13.25
   0   0 -11   84.09   10.22
   0   0 -11   96.13    6.37
   0   0 -12    0.63    4.50
   0   0 -12    3.61    2.48
   0   0  12   -1.83    3.27
   0   0 -13    6.71    2.82
   0   0  13    9.27    4.09
   0   0 -14  157.31    8.50
   0   0  14  175.08   12.06
   0   0 -15    3.15    2.42
   0   0  15   -2.36    4.61
   0   0  16   76.60   10.80
   0   0  16   76.53    8.48
   0   0  17   23.16    8.17
   0   0  17   29.96    6.92
   0   0  18   -0.78    4.76
   0   0  18   11.83    6.49
   0   0  19    6.27    4.60
   0   0  19   10.73    7.24
   0   0  20    2.00    5.25
   0   0  20   -5.45    6.14
   0   0  21    4.80    7.01
   0   0  22   14.23    8.65
   0   0  23   -0.39    7.76
   0  -1  22    0.21    7.47
   0  -1  21  -15.49    8.70
   0  -1  20    5.65    6.28
   0  -1  19   47.26   10.54
   0  -1  18    2.07    4.58
   0   1 -17   13.19    6.93
   0  -1  17    6.62    4.53
   0  -1  16  112.24   10.72
   0   1 -16   88.52   11.75
   0   1 -15    6.17    5.12
   0  -1  15   -7.88    4.66
   0   1 -14  102.15   11.32
   0  -1  14  138.87   10.57
   0   1 -13   13.40    6.57
   0  -1  13   12.56    4.35
   0   1 -12    6.14    3.72
   0   1 -12    0.93    4.30
   0  -1  12    2.98    3.46
   0   1 -11   -1.91    2.88
   0   1 -11   -0.98    4.90
   0  -1  11    5.38    3.02
   0   1 -10  138.95   10.85
   0   1 -10  161.58    9.47
   0  -1  10  149.93    8.97
   0   1  -9   25.02    5.25
   0   1  -9   31.85    4.77
   0  -1   9   17.90    4.10
   0   1  -8   92.45    7.25
   0  -1   8   84.08    6.48
   0   1  -7   39.36    4.42
   0  -1   7   39.26    4.51
   0   1  -7   43.73    5.18
   0   1  -7   33.85    5.59
   0  -1   7   38.32    4.75
   0  -1   6  363.66   10.90
   0   1  -6  365.97   10.82
   0   1  -6  368.78   12.47
   0  -1   6  363.78   12.27
   0   1  -6  357.16   12.31
   0   1  -5   15.93    3.43
   0   1  -5   14.61    3.37
   0  -1   5   17.38    3.30
   0   1  -5   15.00    2.70
   0  -1   5   10.30    2.75
   0   1  -4 5250.15   33.62
   0  -1   4 5198.50   33.11
   0   1  -4 5159.77   41.21
   0  -1   4 5333.14   37.50
   0   1  -4 5309.45   37.56
   0  -1   3  682.41   10.66
   0   1  -3  692.41   10.58
   0  -1   3  706.58   13.01
   0   1  -3  722.14   12.69
   0   1  -3  692.25   14.14
   0   1  -2 6809.27   27.24
   0  -1   2 6843.66   26.81
   0   1  -2 6772.03   40.24
   0   1  -1   53.03    1.95
   0  -1   1   43.42    1.80
   0   1  -1   43.54    3.63
   0  -1   1   45.79    3.33
   0   1  -1   46.26    3.14
   0  -1   0   67.19    3.86
   0   1   0   17.53    2.15
   0   1   1   -2.53    1.85
   0  -1  -1    2.80    1.82
   0   1   2  476.11    6.62
   0  -1  -2  472.22    6.60
   0  -1  -2  444.21    6.68
   0   1   2  435.49    6.33
   0   1   3    0.10    1.42
   0  -1  -3    1.83    1.71
   0  -1  -3    2.01    1.39
   0   1   3   -1.02    1.43
   0  -1  -4   -0.16    1.76
   0   1   4   -0.79    1.87
   0   1   4    0.55    1.86
   0   1   5    2.24    2.22
   0  -1  -5    5.67    2.31
   0   1   5    4.39    2.33
   0   1   6  690.78   14.09
   0  -1  -6  737.89   14.78
   0   1   6  802.78   16.09
   0   1   6  639.33   19.06
   0   1   7  128.07    6.97
   0  -1  -7  129.85    7.22
   0   1   7  128.88    7.42
   0   1   7  142.09    9.55
   0   1   8   -1.26    3.91
   0  -1  -8    3.78    1.00
   0  -1  -8    8.09    3.12
   0   1   8    5.45    2.91
   0   1   8    3.56    3.28
   0  -1  -9   35.65    2.17
   0   1   9   33.25    5.23
   0  -1 -10   13.81    1.72
   0   1  10    7.64    3.39
   0  -1 -11   61.91    3.14
   0   1  11   52.95    6.69
   0  -1 -12  924.95   12.05
   0   1  12  992.37   24.43
   0  -1 -13   70.06    3.53
   0   1  13   78.27    7.61
   0   1  13   62.22    8.27
   0  -1 -14   66.01    3.44
   0   1  14   73.58    8.02
   0   1  14   57.67    8.28
   0  -1 -15   10.52    1.75
   0   1  15   18.59    5.69
   0   1  15   22.21    5.52
   0   1  16   10.31    5.23
   0   1  16    8.81    4.93
   0   1  17   15.88    5.58
   0   1  17   11.40    5.37
   0   1  18    2.11    4.64
   0   1  18    6.68    5.68
   0   1  19    9.11    6.59
   0   1  20   14.27    6.93
   0   1  21   17.33    8.04
   0   1  22   27.07    8.85
   0   1  23   -5.14    6.57
   0  -2  22    9.56    9.55
   0  -2  21   -0.87    7.71
   0   2 -20    0.23    8.57
   0   2 -19    7.60    7.19
   0   2 -18   31.01    9.71
   0   2 -16   32.31    8.74
   0  -2  16   21.34    5.83
   0   2 -15    5.96    5.75
   0  -2  15    2.22    3.66
   0  -2  14   40.50    6.33
   0   2 -14   27.03    6.20
   0   2 -13    5.33    4.26
   0  -2  13    5.56    3.64
   0   2 -12   40.99    8.02
   0  -2  12   44.94    7.04
   0   2 -11    4.25    4.42
   0  -2  11   -0.83    3.30
   0   2 -10  220.26   13.31
   0  -2  10  242.89   11.65
   0   2  -9    2.65    3.52
   0  -2   9    0.76    2.76
   0  -2   8   63.15    5.83
   0   2  -8   76.53    7.71
   0   2  -8   78.55    7.37
   0   2  -7   85.99    7.87
   0   2  -7   79.91    5.91
   0  -2   7   82.00    5.89
   0  -2   6  101.09    6.19
   0   2  -6   95.51    6.00
   0   2  -6   91.23    7.24
   0  -2   6   94.15    7.39
   0   2  -6  108.16    8.80
   0  -2   5  230.59    8.18
   0   2  -5  231.74    8.16
   0   2  -5  229.52    9.82
   0   2  -5  236.00   11.92
   0  -2   4 6856.88   38.91
   0   2  -4 6791.10   39.26
   0   2  -4 6713.26   47.44
   0   2  -4 6825.62   58.11
   0  -2   4 6815.22   49.92
   0   2  -3  408.95    8.43
   0  -2   3  407.42    8.41
   0   2  -3  403.24   12.21
   0  -2   3  385.72   12.51
   0   2  -3  406.87   14.57
   0   2  -2 4771.65   37.09
   0  -2   2 4735.75   40.19
   0   2  -2 4756.71   43.87
   0   2  -2 4756.10   24.07
   0   2  -1  514.83   12.89
   0  -2   1  490.47   12.89
   0   2  -1  502.62   13.94
   0   2  -1  503.54    6.24
   0  -2   0  210.37    9.15
   0   2   0  206.36    8.73
   0   2   0  201.59    8.52
   0   2   1   64.81    6.09
   0  -2  -1   79.29    6.39
   0   2   1   77.53    5.26
   0   2   2    0.59    2.06
   0   2   2    0.70    1.12
   0  -2  -2    0.47    2.35
   0   2   2    1.19    2.32
   0   2   2    1.13    3.73
   0  -2  -3    3.86    1.70
   0   2   3    6.21    1.63
   0  -2  -3    4.39    2.33
   0   2   3    4.40    1.55
   0   2   3    2.89    1.94
   0   2   4  110.32    4.61
   0  -2  -4  114.93    5.05
   0   2   4  115.88    4.76
   0   2   4  110.92    4.80
   0  -2  -4  129.96    5.06
   0   2   5   20.49    2.71
   0  -2  -5   25.23    3.11
   0   2   5   24.04    2.03
   0  -2  -5   24.00    2.97
   0   2   5   27.12    3.09
   0   2   6  113.58    5.92
   0  -2  -6  114.98    6.58
   0   2   6  114.02    5.94
   0  -2  -7   82.57    6.21
   0   2   7   90.14    5.62
   0   2   7   92.69    5.99
   0  -2  -8  734.72   17.88
   0   2   8  734.90   16.87
   0   2   8  687.35   16.52
   0   2   9   26.89    4.57
   0   2  10  515.42   15.77
   0   2  10  482.90   16.07
   0   2  11   49.19    5.80
   0   2  11   50.73    6.07
   0   2  12  365.58   15.08
   0   2  12  325.96   15.25
   0   2  13   13.56    4.55
   0   2  13   13.87    4.97
   0   2  14    6.76    4.31
   0   2  14    8.11    3.86
   0   2  15    0.37    4.02
   0   2  15    5.92    4.42
   0   2  16   10.61    5.19
   0   2  16   12.25    5.67
   0   2  17    5.22    4.85
   0   2  17    5.46    4.14
   0   2  18   -5.60    6.26
   0   2  18   -2.91    4.42
   0   2  19   -5.54    5.63
   0   2  19   -1.37    4.67
   0   2  20   -1.02    6.39
   0   2  20    6.96    5.27
   0   2  21    4.67    6.03
   0   2  21    3.45    5.01
   0   2  22   13.96    8.78
   0   2  22    3.75    5.57
   0   2  23    0.78    7.88
   0   3 -21   13.02    9.90
   0   3 -20   27.62   10.97
   0   3 -19    7.72    6.99
   0   3 -18   11.17    7.73
   0   3 -17    8.58    6.70
   0   3 -16   10.74    6.39
   0   3 -15   -2.94    5.27
   0   3 -14   17.61    6.17
   0   3 -13    0.75    4.73
   0   3 -12    5.51    4.38
   0   3 -11    6.69    4.57
   0  -3  10   72.42    6.73
   0   3 -10   63.05    7.62
   0  -3   9   21.15    4.37
   0   3  -9    9.29    3.90
   0   3  -8  606.72   19.73
   0  -3   8  629.66   16.45
   0   3  -7  243.66   12.35
   0   3  -7  254.34   10.35
   0   3  -6 1529.06   28.30
   0   3  -6 1544.36   22.78
   0   3  -5  235.59   11.26
   0   3  -5  235.17    8.37
   0   3  -4  103.01    5.26
   0   3  -4   85.21    7.82
   0  -3   4   99.63    8.19
   0   3  -4  115.26    9.79
   0  -3   3  108.63    8.47
   0   3  -3  108.65    8.28
   0   3  -3  134.48    9.97
   0   3  -3  120.47    4.95
   0   3  -2  216.45   10.46
   0  -3   2  222.79   11.09
   0   3  -2  242.95    5.89
   0   3  -2  224.38   11.66
   0   3  -1   -4.47    4.17
   0   3  -1    0.68    3.64
   0  -3   1    0.88    3.44
   0   3  -1    1.07    1.03
   0   3   0  693.69   18.58
   0   3   0  678.86   18.09
   0   3   1   -6.19    3.92
   0  -3  -1   -2.14    4.01
   0   3   1    6.59    3.96
   0  -3  -2  885.31   23.28
   0   3   2  828.02   22.45
   0   3   2  852.64    8.79
   0   3   2  871.11   19.11
   0  -3  -3  178.19    6.39
   0   3   3  192.06    4.92
   0   3   3  192.96    8.15
   0   3   3  195.23    9.00
   0   3   4   67.38    8.44
   0   3   4   60.90    3.44
   0  -3  -4   66.38    5.32
   0   3   4   57.38    4.93
   0  -3  -4   56.39    4.04
   0   3   5   89.94    4.65
   0  -3  -5   89.27    6.26
   0   3   5   82.01    5.12
   0  -3  -5   90.61    4.85
   0   3   5   87.58    4.78
   0   3   6  690.10   13.48
   0   3   6  660.08   12.61
   0   3   6  674.35   13.84
   0   3   7  114.36    6.28
   0   3   7  110.93    4.48
   0  -3  -7  114.51    6.40
   0   3   7  110.85    6.32
   0   3   8 1531.06   23.49
   0  -3  -8 1549.71   25.13
   0   3   8 1399.20   23.41
   0   3   8 1427.10   11.60
   0   3   9  413.81   13.56
   0   3  10  297.42   12.04
   0   3  10  263.65   11.54
   0   3  11    5.73    2.75
   0   3  12    5.81    3.46
   0   3  12    8.03    3.32
   0   3  13   10.13    4.27
   0   3  13   13.68    4.70
   0   3  14    3.29    3.66
   0   3  14    2.95    3.72
   0   3  15   14.56    5.40
   0   3  15    2.88    3.72
   0   3  16   17.27    5.62
   0   3  16   18.11    4.81
   0   3  17   31.41    6.51
   0   3  17   21.34    5.54
   0   3  18    2.85    4.73
   0   3  18   12.64    5.69
   0   3  19   13.59    6.35
   0   3  19   16.46    5.71
   0   3  20   -5.23    5.57
   0   3  20    1.00    4.97
   0   3  21  -10.15    6.59
   0   3  21    8.14    6.17
   0   3  22   -8.69    8.19
   0   3  22   -5.60    5.22
   0   3  23   12.48    6.44
   0   4 -20   13.62    8.64
   0   4 -19    6.75    7.67
   0   4 -18   -6.85    6.48
   0   4 -17  -11.13    7.56
   0   4 -16   -1.36    5.64
   0   4 -15    9.79    6.73
   0   4 -14    3.16    5.17
   0   4 -13   -6.11    5.31
   0   4 -12  135.45   12.31
   0   4 -11   -3.04    4.75
   0   4 -10   18.56    5.54
   0   4  -9  250.30   14.55
   0   4  -8 1105.20   28.12
   0   4  -7  221.71   12.65
   0   4  -6  417.83   12.42
   0   4  -6  427.43   17.52
   0   4  -5  100.65    5.78
   0   4  -5   88.90    8.52
   0   4  -4   18.01    2.72
   0   4  -4   16.21    5.14
   0   4  -3   21.89    2.45
   0   4  -2  224.21    5.90
   0   4  -1   41.21    2.31
   0   4  -1   39.58    6.66
   0   4   0 1262.09    8.98
   0   4   0 1332.87   30.31
   0  -4   0 1245.84   30.68
   0   4   0 1262.43   28.41
   0   4   1   22.27    5.21
   0   4   1   22.60    4.65
   0  -4  -1   16.09    5.56
   0   4   2   29.76    1.79
   0   4   2   34.95    4.74
   0   4   2   20.58    6.07
   0  -4  -2   39.72    7.40
   0   4   2   41.27    6.20
   0  -4  -3  119.45   11.24
   0   4   3  128.71   11.14
   0   4   3  144.17    8.28
   0   4   3  125.04    3.98
   0   4   3  117.39    8.73
   0   4   4  633.75   23.79
   0   4   4  626.51   10.05
   0   4   4  637.39   16.22
   0   4   4  635.22   18.02
   0  -4  -4  595.79   12.66
   0   4   5  212.51    6.79
   0  -4  -5  222.29    9.54
   0   4   5  218.83   10.21
   0  -4  -5  225.22    8.02
   0   4   6 1171.28   17.43
   0   4   6 1143.47   21.30
   0  -4  -6 1189.66   18.68
   0   4   7  947.06   17.16
   0  -4  -7  945.99   20.79
   0   4   7  923.32   17.85
   0   4   7  917.29   17.54
   0  -4  -7  954.24   17.42
   0   4   8  193.61    8.43
   0   4   8  178.57    7.14
   0   4   8  191.77    8.79
   0  -4  -8  208.28    9.11
   0   4   9  188.85    9.10
   0  -4  -9  161.00    8.58
   0   4   9  164.94    8.63
   0   4   9  170.05    5.95
   0   4  10   84.90    6.43
   0   4  10   80.61    6.67
   0   4  10   82.86    3.14
   0   4  11   17.97    4.01
   0   4  11   16.41    4.13
   0   4  12    3.03    2.91
   0   4  12   -3.26    3.29
   0   4  13    1.98    3.63
   0   4  13    1.29    3.70
   0   4  14    4.25    3.55
   0   4  14    0.67    3.41
   0   4  15    7.93    4.52
   0   4  15    4.45    3.65
   0   4  16    8.54    4.99
   0   4  16    6.57    3.74
   0   4  17  138.91   11.15
   0   4  17  125.39   11.69
   0   4  18   47.85    8.21
   0   4  18   39.41    7.72
   0   4  19    4.43    5.10
   0   4  19   10.57    5.59
   0   4  20    5.48    6.32
   0   4  20   18.09    6.20
   0   4  21   15.24    7.23
   0   4  21   18.54    6.77
   0   4  22    8.96    6.64
   0   4  22   12.28    5.35
   0   4  23   -2.97    6.26
   0   4  23   14.75    7.14
   0   5 -19  -14.42    8.66
   0   5 -18   21.58    8.07
   0   5 -17   -7.71    7.68
   0   5 -16   11.47    6.34
   0   5 -15    9.57    7.85
   0   5 -14    2.32    6.35
   0   5 -13   32.03    7.66
   0   5 -12    5.63    4.52
   0   5 -11  118.12   11.69
   0   5 -10  996.07   30.94
   0   5  -9    2.01    4.46
   0   5  -8   24.00    5.65
   0   5  -7  141.85   11.58
   0   5  -6   80.21    9.16
   0   5  -6   88.58    6.06
   0   5  -5    9.38    2.53
   0   5  -5   15.38    4.93
   0   5  -4  210.54   13.78
   0   5  -4  220.50    7.77
   0   5  -3   41.31    6.91
   0   5  -3   42.54    3.32
   0   5  -2  158.09   11.89
   0   5  -2  151.87    4.97
   0   5  -1    5.76    4.11
   0   5  -1    6.95    1.18
   0   5   0   99.59    9.77
   0   5   1   38.15    7.49
   0   5   2   -1.32    4.61
   0   5   3  219.31   11.55
   0   5   3  205.31    4.66
   0   5   3  202.79   14.93
   0  -5  -4  296.56   10.05
   0   5   4  304.79    6.85
   0   5   4  316.47   13.05
   0   5   4  283.16   13.88
   0   5   4  297.48   18.29
   0  -5  -5  397.45   11.84
   0   5   5  417.55    9.06
   0   5   5  388.23   15.78
   0   5   5  375.47   20.56
   0  -5  -6  254.82    9.49
   0   5   6  269.82   17.98
   0   5   6  272.28    8.24
   0   5   6  259.40   12.64
   0   5   7    4.92    1.71
   0   5   7   15.45    6.64
   0  -5  -7    9.26    2.87
   0  -5  -7    5.76    3.37
   0   5   7    7.26    3.41
   0  -5  -8  201.90    9.11
   0   5   8  219.42   17.67
   0   5   8  214.07    8.74
   0  -5  -8  225.01   11.82
   0   5   8  191.42    9.37
   0  -5  -9    4.54    2.57
   0  -5  -9    3.02    3.29
   0   5   9   10.90    2.99
   0   5   9    7.19    2.89
   0  -5 -10  133.59    9.83
   0   5  10  149.09    8.48
   0   5  10  156.73    8.65
   0  -5 -10  128.00    8.12
   0   5  10  143.32    6.64
   0   5  11  181.07    9.84
   0   5  11  169.73    9.66
   0   5  11  164.39    5.89
   0   5  12   13.94    4.09
   0   5  12    8.38    3.02
   0   5  13    5.26    3.92
   0   5  13    3.75    3.78
   0   5  14    1.88    3.63
   0   5  14   -1.28    3.70
   0   5  15    3.96    3.75
   0   5  15    4.76    3.38
   0   5  16   -1.95    3.97
   0   5  16    1.82    3.78
   0   5  17    5.33    4.93
   0   5  17    4.32    4.11
   0   5  18    6.93    5.65
   0   5  18   -5.36    4.79
   0   5  19  130.36   11.65
   0   5  19  112.69   11.95
   0   5  20   11.90    5.91
   0   5  20   12.56    5.24
   0   5  21   39.14    9.12
   0   5  21   30.72    7.61
   0   5  22    5.04    5.44
   0   5  22    4.13    5.66
   0   6 -17   17.52    8.33
   0   6 -16    6.44    7.75
   0   6 -15   -5.59    7.02
   0   6 -14   23.56    6.92
   0   6 -13   15.64    7.43
   0   6 -12   37.12    8.22
   0   6 -11   74.97    9.82
   0   6 -10    3.64    5.26
   0   6  -9   83.24   10.82
   0   6  -8  261.70   16.86
   0   6  -7   32.33    7.03
   0   6  -6   30.07    4.04
   0   6  -6   30.82    6.91
   0   6  -5    8.01    2.66
   0   6  -5   11.64    5.65
   0   6  -4   39.32    3.63
   0   6  -4   33.03    6.95
   0   6  -3   10.19    4.66
   0   6  -3    7.43    2.00
   0   6  -2    4.47    4.92
   0   6  -2    2.08    1.26
   0   6  -1   14.27    6.22
   0   6   0   46.10    8.30
   0   6   1  115.31   12.17
   0   6   2  676.63   21.91
   0   6   2  632.82   26.12
   0   6   3  499.87   18.75
   0   6   3  490.42   23.57
   0   6   4  105.37    3.69
   0   6   4  123.69    9.92
   0   6   4  109.72   13.17
   0   6   5  129.99   13.76
   0  -6  -5  119.37    7.12
   0   6   5  134.21    4.83
   0   6   5  132.41    9.63
   0  -6  -6    0.36    2.26
   0   6   6    3.56    1.74
   0  -6  -7    0.49    2.12
   0   6   7    2.08    8.24
   0   6   7    0.43    1.71
   0  -6  -8    0.31    2.23
   0   6   8    9.67    3.97
   0   6   8    4.26    6.54
   0   6   8    1.99    2.10
   0   6   9   36.01    9.84
   0  -6  -9   24.65    4.08
   0   6   9   28.97    3.96
   0  -6  -9   31.28    5.51
   0   6   9   27.46    4.57
   0   6  10   60.97   11.87
   0   6  10   47.87    5.12
   0  -6 -10   62.16    7.67
   0   6  10   52.03    5.27
   0   6  11   19.14    8.92
   0  -6 -11   20.11    5.58
   0   6  11   21.80    3.51
   0   6  11   20.25    4.18
   0   6  12   36.62    3.77
   0  -6 -12   30.70    6.33
   0   6  12   30.36    4.63
   0   6  13    5.31    3.90
   0  -6 -13   -2.13    4.59
   0   6  13    1.13    1.22
   0   6  13    2.21    3.37
   0   6  14   -7.21    4.37
   0   6  14    0.27    3.57
   0  -6 -14    2.91    5.58
   0   6  15    3.48    3.53
   0   6  15    6.51    3.49
   0   6  16    1.44    4.01
   0   6  16    0.89    3.60
   0   6  17   11.11    5.31
   0   6  17    2.16    4.62
   0   6  18   14.34    5.50
   0   6  18   15.01    5.02
   0   6  19   34.84    7.50
   0   6  19   41.29    7.25
   0   6  20    5.32    4.89
   0   6  20   11.06    6.44
   0   6  21   20.72    5.91
   0   6  22    8.95    6.67
   0   7 -15   16.31    7.65
   0   7 -14    3.08    6.18
   0   7 -13    7.96    6.19
   0   7 -12   14.76    6.84
   0   7 -11    7.17    5.67
   0   7 -10    1.95    4.66
   0   7  -9    3.60    5.08
   0   7  -8   -0.65    5.13
   0   7  -7    2.43    4.77
   0   7  -6   -6.67    5.98
   0   7  -5    2.93    4.99
   0   7  -4   24.79    6.58
   0   7  -3    5.51    5.36
   0   7  -2   75.93   10.58
   0   7  -1   62.33   10.09
   0   7   0   46.34    8.49
   0   7   1  268.25   18.35
   0   7   2    8.29    6.03
   0   7   3   25.18    8.57
   0   7   4   11.60    7.00
   0   7   5   12.04    7.38
   0  -7  -6    4.04    3.04
   0   7   6    0.86    1.44
   0  -7  -7   -0.66    2.50
   0   7   7   -5.06    7.59
   0   7   7    0.36    1.71
   0  -7  -8   13.57    3.74
   0   7   8   21.24   10.48
   0   7   8   15.93    2.78
   0   7   9  -11.16    8.48
   0   7   9    3.11    2.24
   0   7  10   15.91    8.95
   0   7  11   -4.04    7.60
   0   7  11    3.59    2.41
   0   7  12   10.40    8.93
   0   7  12   -3.00    2.86
   0  -7 -12    6.48    5.03
   0   7  13    4.42    8.41
   0   7  13   -1.63    2.99
   0  -7 -13    0.30    5.10
   0   7  14   10.74    9.03
   0   7  14    6.16    4.20
   0  -7 -14    8.00    5.68
   0   7  15   36.22   12.49
   0   7  15   39.11    6.28
   0  -7 -15   36.36    7.91
   0  -7 -16    1.69    5.33
   0   7  16   -0.62    4.10
   0  -7 -17   13.36    6.67
   0   7  17    8.95    4.57
   0   7  18   -0.02    4.20
   0   7  19   -1.14    4.99
   0   7  20   -4.53    5.33
   0   7  21   21.02    6.46
   0   8 -13   19.74    7.84
   0   8 -12    3.98    5.91
   0   8 -11   -9.27    5.72
   0   8 -10    5.43    7.20
   0   8  -9    3.67    5.27
   0   8  -8   -1.09    5.42
   0   8  -7    1.96    5.69
   0   8  -6    2.29    6.08
   0   8  -5   -6.46    6.60
   0   8  -4   -1.75    6.38
   0   8  -3   23.33    7.17
   0   8  -2    9.88    7.57
   0   8  -1  101.68   14.16
   0   8   0   10.22    7.30
   0   8   1   22.97    8.07
   0   8   2    5.92    5.54
   0   8   3    7.06    6.33
   0   8   4    3.69    6.85
   0   8   5  -10.02    6.78
   0   8   6   10.85    7.51
   0   8   7   16.18    9.30
   0   8   8   27.70   10.23
   0   8   9   41.55    4.07
   0   8   9   62.17   13.32
   0   8  10   -8.99    8.36
   0   8  10   -0.21    2.24
   0   8  11    4.25    9.27
   0   8  11    4.41    3.02
   0   8  12   25.57   11.46
   0   8  12   -2.08    2.67
   0   8  13    8.74    8.83
   0   8  13   12.87    3.73
   0   8  14   15.85   10.08
   0   8  14    3.77    3.10
   0   8  15    3.04   12.19
   0   8  15    2.66    3.72
   0   8  16  -16.01   10.26
   0   8  16   -1.26    3.48
   0   8  17    6.60   12.63
   0   8  17   11.85    5.03
   0   8  18  -16.49   12.37
   0   8  18   -0.21    4.06
   0   8  19   26.97   17.23
   0   8  20    4.67   13.35
   0   9 -11  -20.96    8.15
   0   9 -10    0.13    6.14
   0   9  -9    2.82    6.73
   0   9  -8   -0.12    5.73
   0   9  -7   -7.00    7.36
   0   9  -6  -15.57    7.01
   0   9  -5   10.58    6.08
   0   9  -4    9.06    8.09
   0   9  -3   28.19    8.54
   0   9  -2    5.43    5.69
   0   9  -1    0.40    5.92
   0   9   0   77.83   12.45
   0   9   1    3.53    6.35
   0   9   2   18.64    9.02
   0   9   3    7.42    6.41
   0   9   4  -15.27   10.36
   0   9   5    5.30    7.83
   0   9   6    3.25    6.64
   0   9   7   67.80   13.30
   0   9   8   96.67   15.23
   0   9   9   13.00    9.57
   0   9  10   -9.64   10.41
   0   9  11   71.16   15.98
   0   9  12   12.97   11.07
   0   9  13   -2.38    9.44
   0   9  14    0.35    9.52
   0   9  15   39.82   16.33
   0   9  16   -2.85   13.33
   0   9  17   52.00   16.36
   0   9  18  -22.65   12.76
   0  10  -8    0.81    6.32
   0  10  -7    2.07    6.93
   0  10  -6   -5.54    7.01
   0  10  -5   17.24    7.39
   0  10  -4    5.80    7.08
   0  10  -3   -2.99    6.20
   0  10  -2   20.86    8.03
   0  10  -1    6.85    8.53
   0  10   0    3.18    7.92
   0  10   1   10.00    8.65
   0  10   2   27.64    9.55
   0  10   3    5.25    7.40
   0  10   4   11.85    8.28
   0  10   5   16.47   10.41
   0  10   6    2.38   10.21
   0  10   7   12.95    9.76
   0  10   8   18.77   10.25
   0  10   9  121.44   17.99
   0  10  10   31.20   12.35
   0  10  11   39.09   12.65
   0  10  12   36.27   13.27
   0  10  13    0.70   11.06
   0  10  14    5.17   12.85
   0  10  15   23.32   13.59
   0  10  16  -11.25   13.93
   0  11  -4   14.21    8.40
   0  11  -3    6.41    7.54
   0  11  -2   12.33    8.44
   0  11  -1   32.74   10.02
   0  11   0    6.49    7.72
   0  11   1   -0.91    7.78
   0  11   2   28.20   12.32
   0  11   3   20.46   10.95
   0  11   4   13.83    8.66
   0  11   5    8.43    9.27
   0  11   6   16.71    9.89
   0  11   7   28.45   14.93
   0  11   8    3.01    9.58
   0  11   9   55.56   15.81
   0  11  10   25.95   12.12
   0  11  11   19.83   11.35
   0  11  12   25.64   13.40
   0  11  13   45.58   15.15
  -1  11  12  -13.06   11.96
  -1  11  11   30.18   13.96
  -1  11  10    7.54   10.40
  -1  11   9   60.04   15.59
  -1  11   8   -7.07    9.91
  -1  11   7   10.02    9.43
  -1  11   6   24.83   12.42
  -1  11   5  -10.74    9.24
  -1  11   4   20.67   10.12
  -1  11   3    0.29    8.01
  -1  11   2   -3.47    8.83
  -1  11   1    2.86    9.86
  -1  11   0   -1.67    7.78
  -1  11  -1    0.84    7.06
  -1  11  -2   11.91    8.36
  -1  11  -3    7.78    7.15
  -1  10  16    2.63   11.99
  -1  10  15   21.38   15.36
  -1  10  14   38.46   15.28
  -1  10  13   64.82   14.59
  -1  10  12   -1.12   11.23
  -1  10  11   78.44   16.07
  -1  10  10  -18.79   11.90
  -1  10   9   83.55   14.01
  -1  10   8   -2.00    8.97
  -1  10   7   15.96    8.77
  -1  10   6    8.83    8.84
  -1  10   5    2.03    8.76
  -1  10   4    5.18    9.43
  -1  10   3    2.90    6.99
  -1  10   2   -1.38    7.35
  -1  10   1    2.33    8.37
  -1  10   0    8.36    6.80
  -1  10  -1   -0.65    7.21
  -1  10  -2   -7.95    7.70
  -1  10  -3   17.32    8.83
  -1  10  -4   24.92    8.65
  -1  10  -5    6.80    7.26
  -1  10  -6   -5.86    7.01
  -1  10  -7   -9.44    7.85
  -1  10  -8    6.33    6.61
  -1   9  18   18.08   14.21
  -1   9  17   -8.55   12.29
  -1   9  16  -13.02   10.97
  -1   9  15   -5.50   10.27
  -1   9  14  -12.53   12.27
  -1   9  13   11.55   10.88
  -1   9  12   31.13   13.61
  -1   9  11  110.78   18.05
  -1   9  10   32.49   12.04
  -1   9   9    6.62    8.80
  -1   9   8   23.98    9.80
  -1   9   7  143.26   17.58
  -1   9   6   17.02    8.02
  -1   9   5   14.28    8.31
  -1   9   4   -0.78    6.74
  -1   9   3   -3.69    6.48
  -1   9   2   36.14   10.76
  -1   9   1   32.51    9.63
  -1   9   0    1.21    6.24
  -1   9  -1   33.72   10.00
  -1   9  -2   10.28    6.96
  -1   9  -3    9.16    6.93
  -1   9  -4   33.53    8.48
  -1   9  -5    2.80    6.35
  -1   9  -6   12.47    8.36
  -1   9  -7    0.05    6.02
  -1   9  -8    4.06    5.85
  -1   9  -9   13.69    7.82
  -1   9 -10   10.92    8.32
  -1   9 -11   -4.40    7.18
  -1   8  19    8.62   11.27
  -1   8  19    0.28    5.26
  -1   8  18  -35.74   14.57
  -1   8  18    9.05    4.81
  -1   8  17   32.89   14.96
  -1   8  17   17.97    4.90
  -1   8  16    3.09   10.33
  -1   8  16    3.91    3.99
  -1   8  15   68.11    7.44
  -1   8  15   60.53   16.45
  -1   8  14    0.54   10.86
  -1   8  14    0.10    3.98
  -1   8  13   15.64    9.90
  -1   8  13    7.14    3.59
  -1   8  12   -4.47    9.80
  -1   8  12   -0.74    2.95
  -1   8  11    4.25    8.23
  -1   8  11    0.23    2.87
  -1   8  10   -3.29    8.41
  -1   8  10    6.42    3.11
  -1   8   9   23.71    9.63
  -1   8   8   86.10    5.76
  -1   8   8   88.23   14.90
  -1   8   7   16.39    7.95
  -1   8   7    3.87    2.19
  -1   8   6  316.34    9.18
  -1   8   6  281.72   22.29
  -1   8   5   94.67    4.66
  -1   8   5   84.52   13.07
  -1   8   4    2.59    1.53
  -1   8   4    9.78    7.75
  -1   8   3   20.77    1.98
  -1   8   3   13.67    7.21
  -1   8   2    1.50    1.06
  -1   8   2   -5.93    5.62
  -1   8   1    3.67    6.41
  -1   8   0    7.42    6.45
  -1   8  -1    5.22    7.40
  -1   8  -2  123.23   14.00
  -1   8  -3   -5.33    6.49
  -1   8  -4   16.96    6.99
  -1   8  -5    0.02    5.29
  -1   8  -6    0.45    5.27
  -1   8  -7   -8.00    5.20
  -1   8  -8   -2.29    5.93
  -1   8  -9    1.63    5.90
  -1   8 -10   -6.31    7.30
  -1   8 -11    4.55    5.95
  -1   8 -12   22.32    8.72
  -1   8 -13    0.30    5.92
  -1   7  21   10.97    5.64
  -1   7  20    1.59    5.89
  -1   7  19   33.88    7.16
  -1   7  18    4.48    5.10
  -1   7  17   37.80    7.54
  -1   7  16   31.91    6.31
  -1   7  15    3.22    4.11
  -1   7  14   27.74   12.20
   1  -7 -14   17.64    5.61
  -1   7  14   15.29    4.55
  -1   7  13   31.21    3.59
  -1   7  13   42.04   12.01
   1  -7 -13   31.74    5.45
  -1   7  13   29.47    5.83
  -1   7  12   -3.66    8.59
  -1   7  12    2.02    2.97
  -1   7  11   12.93   10.17
  -1   7  11    5.31    3.69
  -1   7  10    4.69    7.96
  -1   7  10    3.27    2.61
  -1   7   9   18.59   10.07
   1  -7  -9    5.24    2.55
   1  -7  -8    4.99    2.43
  -1   7   8    1.67    2.28
  -1   7   8    1.09    7.27
   1  -7  -7   18.97    3.20
  -1   7   7   27.78   10.62
  -1   7   7   31.13    3.88
   1  -7  -6   16.04    3.18
  -1   7   6   15.73    2.90
  -1   7   5    5.15    1.97
   1  -7  -5    6.44    2.37
  -1   7   4   20.51    6.93
  -1   7   4   10.33    4.34
  -1   7   4   22.06    2.73
  -1   7   3   -6.87    4.99
  -1   7   3    2.53    3.87
  -1   7   2    6.48    6.89
  -1   7   1   66.33   10.41
  -1   7   0   10.38    6.74
  -1   7  -1    2.93    1.75
  -1   7  -1   11.09    7.35
  -1   7  -2    3.29    1.81
  -1   7  -2    9.72    6.12
  -1   7  -3    5.69    2.27
  -1   7  -3    1.46    4.48
  -1   7  -4    3.75    5.46
  -1   7  -5   14.66    6.62
  -1   7  -6    9.03    5.56
  -1   7  -7   -4.79    5.68
  -1   7  -8   12.29    5.83
  -1   7  -9    0.85    4.94
  -1   7 -10    2.40    5.69
  -1   7 -11    4.67    6.85
  -1   7 -12   23.34    7.15
  -1   7 -13    3.42    6.43
  -1   7 -14   -2.67    6.05
  -1   7 -15   12.68    8.05
  -1   6  22   -5.88    5.46
  -1   6  21   33.25    8.28
  -1   6  20   25.24    6.87
  -1   6  19    9.82    5.38
  -1   6  18    4.18    5.22
  -1   6  17   -1.05    4.20
  -1   6  17    6.06    4.22
  -1   6  16    9.16    4.76
  -1   6  16   10.60    4.04
  -1   6  15    6.55    3.74
  -1   6  15    3.01    3.04
  -1   6  14   12.75    4.38
   1  -6 -14    2.14    4.45
  -1   6  13    5.56    3.49
  -1   6  13   10.40    2.01
   1  -6 -13    3.49    3.94
  -1   6  13    8.45    3.46
  -1   6  12   13.16    3.78
  -1   6  12   16.07    2.39
   1  -6 -12    8.72    4.22
  -1   6  11    4.55    3.51
   1  -6 -11    2.57    3.83
  -1   6  11   -2.34    3.44
  -1   6  11   -7.31    9.61
   1  -6 -10   43.10    5.30
  -1   6  10   30.33    4.73
  -1   6  10   31.24    5.52
  -1   6  10   43.16   11.40
  -1   6   9   14.39    9.29
  -1   6   9   12.55    4.74
  -1   6   9   13.95    3.40
  -1   6   8   91.50    6.39
   1  -6  -8   81.25    5.23
  -1   6   7   35.69    8.73
   1  -6  -7   40.76    3.75
  -1   6   7   45.05    4.40
  -1   6   6    2.36    5.82
  -1   6   6    4.63    2.55
   1  -6  -6   -0.17    1.76
  -1   6   5    8.46    6.31
  -1   6   5   13.46    2.93
   1  -6  -5   10.84    2.33
  -1   6   4   62.57    5.99
  -1   6   4   57.88    9.78
  -1   6   3    2.31    3.07
  -1   6   3    2.70    5.01
  -1   6   2  331.82   18.64
  -1   6   1   63.86    8.97
  -1   6   0   20.62    7.53
  -1   6  -1    5.81    4.89
  -1   6  -2    9.74    1.98
  -1   6  -2    9.35    5.53
  -1   6  -3   -0.42    1.82
  -1   6  -3    3.55    4.57
  -1   6  -4    2.16    2.15
  -1   6  -4   -7.61    5.05
  -1   6  -5    3.12    2.30
  -1   6  -5    3.77    5.57
  -1   6  -6   34.33    6.72
  -1   6  -7   78.63    9.92
  -1   6  -8   -6.09    4.80
  -1   6  -9   11.19    5.87
  -1   6 -10    6.29    5.37
  -1   6 -11   10.72    5.73
  -1   6 -12    6.52    6.62
  -1   6 -13   -0.65    5.55
  -1   6 -14   -2.18    5.09
  -1   6 -15    2.93    6.09
  -1   6 -16   -2.87    8.29
  -1   6 -17    4.42    7.80
  -1   5  22   -1.07    5.82
  -1   5  21   50.32    8.58
  -1   5  20   -1.50    4.74
  -1   5  20    0.39    4.84
  -1   5  19   96.30   11.30
  -1   5  19   99.63   10.85
  -1   5  18   38.64    7.71
  -1   5  18   33.21    6.87
  -1   5  17   10.76    5.02
  -1   5  17   17.27    5.88
  -1   5  16   -0.43    3.78
  -1   5  16    0.97    3.51
  -1   5  15    4.07    4.17
  -1   5  15   -2.73    3.37
  -1   5  14    2.30    3.57
  -1   5  14   -2.98    3.73
  -1   5  13   14.78    4.46
  -1   5  12   21.44    2.94
  -1   5  12   24.19    4.57
  -1   5  12   22.24    4.74
  -1   5  12   17.99    2.06
  -1   5  11   55.07    5.38
  -1   5  11   55.90    6.20
  -1   5  11   45.86    4.56
  -1   5  11   51.72    3.61
  -1   5  10   25.87    3.73
  -1   5  10   21.14    3.78
   1  -5 -10   16.28    4.01
  -1   5  10   26.28    4.36
   1  -5  -9    4.68    3.42
  -1   5   9    4.08    2.66
  -1   5   9    1.29    3.16
  -1   5   8   52.49    9.13
  -1   5   8   59.24    5.24
   1  -5  -8   48.16    4.79
  -1   5   8   46.29    6.14
   1  -5  -7    4.93    1.96
  -1   5   7    0.24    5.58
  -1   5   7    1.56    1.77
   1  -5  -6    7.45    1.86
  -1   5   6    3.28    5.46
  -1   5   6    6.09    2.20
  -1   5   5   18.41    6.92
   1  -5  -5   17.78    2.35
  -1   5   4    6.06    2.93
  -1   5   4    1.93    5.57
   1  -5  -4    5.99    1.73
  -1   5   3   -6.51    5.33
  -1   5   3   -0.18    2.76
  -1   5   2  165.36   12.99
  -1   5   1   58.22    7.76
  -1   5   0   16.30    5.57
  -1   5  -1   46.11    7.24
  -1   5  -2  329.99   16.06
  -1   5  -3   -5.08    4.30
  -1   5  -3    3.22    1.72
  -1   5  -4    3.53    2.06
  -1   5  -4   -6.54    4.63
  -1   5  -5   29.13    6.06
  -1   5  -5   30.45    3.74
  -1   5  -6    8.07    4.50
  -1   5  -7    9.80    4.83
  -1   5  -8    1.92    4.04
  -1   5  -9   18.76    5.88
  -1   5 -10  213.39   15.11
  -1   5 -11   65.05    9.11
  -1   5 -12   14.94    6.00
  -1   5 -13   14.99    6.18
  -1   5 -14   -1.28    5.90
  -1   5 -15    5.71    5.71
  -1   5 -16    2.96    7.32
  -1   5 -17    0.36    5.87
  -1   5 -18   18.15    9.46
  -1   4  23    6.49    7.27
  -1   4  23    5.52    6.28
  -1   4  22    6.48    6.56
  -1   4  22   -5.10    5.97
  -1   4  21   34.88    8.29
  -1   4  21   31.87    7.96
  -1   4  20   12.82    5.92
  -1   4  20   34.10    7.48
  -1   4  19    7.65    4.78
  -1   4  19   20.44    6.51
  -1   4  18    7.44    4.81
  -1   4  18   12.41    5.61
  -1   4  17  145.68   12.09
  -1   4  17  172.11   12.62
  -1   4  16   36.28    6.31
  -1   4  16   28.94    6.32
  -1   4  15   16.45    5.13
  -1   4  15   17.51    5.72
  -1   4  14    3.47    3.62
  -1   4  14   -0.29    3.61
  -1   4  13    8.72    4.12
  -1   4  12   23.51    4.27
  -1   4  12   24.15    5.33
  -1   4  11   55.21    6.18
  -1   4  11   44.77    5.06
  -1   4  11   57.16    2.86
  -1   4  11   57.74    3.75
  -1   4  10   13.94    4.00
  -1   4  10    8.21    2.42
  -1   4  10   11.23    1.93
  -1   4  10    6.82    2.81
  -1   4   9  158.12    5.75
  -1   4   9  161.61    7.54
  -1   4   9  166.73    8.99
  -1   4   8  765.66   14.57
  -1   4   8  802.49   17.99
  -1   4   7   20.75    2.60
  -1   4   7   20.39    3.82
   1  -4  -7   19.25    3.36
   1  -4  -6  877.94   12.83
  -1   4   6  866.73   17.03
   1  -4  -5  246.09    6.39
  -1   4   4   94.69   10.16
   1  -4  -4   94.63    3.91
  -1   4   3    9.25    2.68
  -1   4   3    9.21    5.30
   1  -4  -2   99.83    9.81
  -1   4   2   90.45    9.26
   1  -4  -1  138.16   11.05
  -1   4   1  154.41   10.61
  -1   4   0 1187.97   27.31
   1  -4   0 1269.52   30.65
   1  -4   1   -0.86    4.43
  -1   4  -1   -3.06    3.46
  -1   4  -2  116.92    9.68
  -1   4  -4  746.37   14.74
  -1   4  -4  805.04   22.45
  -1   4  -5   -0.86    1.89
  -1   4  -5    1.11    3.60
  -1   4  -6  191.69    8.75
  -1   4  -6  192.72   11.53
  -1   4  -7   10.28    4.36
  -1   4  -8   22.95    5.15
  -1   4  -9   77.88    9.02
  -1   4 -10   69.73    8.10
  -1   4 -11    5.05    4.61
  -1   4 -12  121.08   11.69
  -1   4 -13   -0.58    4.52
  -1   4 -14   18.38    7.18
  -1   4 -15    8.23    7.90
  -1   4 -16    7.97    6.46
  -1   4 -17    6.57    6.82
  -1   4 -18    0.50    7.28
  -1   4 -19   -7.31    7.21
  -1   4 -20   -5.48    8.46
  -1   3  23   -2.04    5.70
  -1   3  23    3.76    5.61
  -1   3  22    1.76    6.60
  -1   3  22    3.67    7.08
  -1   3  21    2.55    5.55
  -1   3  21   -1.62    5.16
  -1   3  20   31.81    7.59
  -1   3  20   12.54    5.43
  -1   3  19    6.20    4.68
  -1   3  19   22.61    6.72
  -1   3  18   84.76    9.75
  -1   3  18   74.01    9.61
  -1   3  17    9.06    4.94
  -1   3  17   21.29    6.48
  -1   3  16  130.45   11.24
  -1   3  16  104.70    9.92
  -1   3  15  249.92   14.45
  -1   3  15  199.47   12.89
  -1   3  14   -1.19    3.80
  -1   3  14    7.06    5.02
  -1   3  13    1.90    3.58
  -1   3  13   -2.41    3.44
  -1   3  12   -4.31    3.36
  -1   3  11   29.48    4.89
  -1   3  11   20.68    4.00
  -1   3  10   -1.84    2.52
  -1   3  10    0.96    2.99
  -1   3  10   -1.63    0.97
  -1   3   9   14.42    1.65
  -1   3   9    9.31    2.48
  -1   3   9   11.02    3.36
  -1   3   8  700.52   10.30
  -1   3   8  682.54   14.67
  -1   3   7  279.51    7.04
  -1   3   7  274.25    8.44
  -1   3   6   15.67    3.25
  -1   3   6    9.02    1.79
  -1   3   5   39.83    2.62
  -1   3   4  117.33    9.64
   1  -3  -4  103.63    3.35
  -1   3   3   11.41    4.76
   1  -3  -3    8.18    1.23
  -1   3   2   17.27    5.59
   1  -3  -2   19.02    5.51
   1  -3  -1    5.85    3.95
  -1   3   1    6.10    4.69
   1  -3   0    4.20    3.89
  -1   3   0    7.54    3.32
  -1   3  -1   34.95    4.92
   1  -3   1   42.76    5.68
  -1   3  -2 1353.10   24.43
   1  -3   2 1301.01   25.42
   1  -3   3    1.80    3.22
  -1   3  -3    3.55    2.81
   1  -3   4    9.13    4.10
  -1   3  -4    8.39    2.13
  -1   3  -4   10.19    3.58
  -1   3  -5    7.94    2.42
  -1   3  -5    1.15    2.79
  -1   3  -6  268.72    9.93
  -1   3  -7   21.92    4.66
  -1   3  -8   45.50    6.19
  -1   3  -9    3.22    3.84
  -1   3 -10   24.51    5.19
  -1   3 -11    1.17    3.72
  -1   3 -12    4.60    4.56
  -1   3 -13   45.53    8.22
  -1   3 -14  114.75   12.17
  -1   3 -15    2.32    6.23
  -1   3 -16   70.95   11.07
  -1   3 -17    3.03    6.56
  -1   3 -18   22.41    9.86
   1  -3  19    9.16    8.75
  -1   3 -19    5.16    8.26
   1  -3  20    3.14    6.91
  -1   3 -20    3.41    8.87
   1  -3  21   -1.96    7.99
  -1   3 -21   14.21   10.18
  -1   2  23   10.84    7.63
  -1   2  23   18.96    7.42
  -1   2  22    3.31    6.41
  -1   2  22    5.67    6.59
  -1   2  21   12.98    7.04
  -1   2  21    3.23    5.04
  -1   2  20   14.51    7.29
  -1   2  20   -1.67    4.49
  -1   2  19    3.57    5.30
  -1   2  19    1.33    4.91
  -1   2  18   11.20    6.44
  -1   2  18   15.43    5.82
  -1   2  17   30.68    6.65
  -1   2  17   19.31    6.00
  -1   2  16   19.03    5.60
  -1   2  16   17.45    5.33
  -1   2  15   21.33    5.76
  -1   2  15   17.74    5.13
  -1   2  14   57.25    7.49
  -1   2  14   54.82    7.33
  -1   2  13   -3.87    4.09
  -1   2  13    0.11    3.39
  -1   2  12   24.25    5.18
  -1   2  12   33.17    5.70
  -1   2  11    2.26    2.86
  -1   2  10    1.36    1.34
  -1   2  10    3.33    3.35
  -1   2  10   -0.56    3.11
  -1   2   9   16.90    3.44
  -1   2   9   22.43    4.37
  -1   2   9   21.17    2.10
  -1   2   8  107.87    6.73
  -1   2   8  122.94    7.46
  -1   2   8  128.46    4.18
  -1   2   7   13.60    2.65
  -1   2   7   16.33    1.69
  -1   2   7   21.11    3.64
  -1   2   6  118.83    3.97
  -1   2   6  124.62    5.63
  -1   2   5   11.23    1.73
  -1   2   5   12.60    2.18
  -1   2   4 2184.87   14.90
  -1   2   2 1198.70   22.41
   1  -2  -1  391.04   12.63
  -1   2   1  396.69   12.14
   1  -2   0  709.83   15.84
  -1   2   0  690.55   14.23
  -1   2  -1   60.39    4.97
   1  -2   1   49.17    4.97
   1  -2   2  440.34   12.15
  -1   2  -2  487.86   11.83
  -1   2  -3    0.31    2.33
   1  -2   3   -3.24    2.53
   1  -2   4  875.08   17.80
  -1   2  -4  970.63   17.63
   1  -2   5  139.49    8.27
  -1   2  -5  162.55    7.10
  -1   2  -5  136.50    7.90
  -1   2  -6    0.75    2.75
   1  -2   6    5.06    3.24
  -1   2  -6    1.83    2.53
  -1   2  -7    1.30    2.79
  -1   2  -7    7.15    2.60
  -1   2  -8    1.10    3.28
  -1   2  -8    5.06    4.14
  -1   2  -9    4.14    3.46
  -1   2 -10   28.66    5.39
  -1   2 -11   -5.12    4.70
  -1   2 -12   31.55    6.52
  -1   2 -13    6.13    5.42
  -1   2 -14  250.19   17.32
  -1   2 -15    7.19    5.37
  -1   2 -16    0.27    6.33
  -1   2 -17    0.49    5.87
   1  -2  17   -7.43    5.76
  -1   2 -18   -8.95    8.47
   1  -2  18    1.98    6.50
  -1   2 -19    9.26    8.71
   1  -2  19  -11.91    7.62
   1  -2  20   13.72    8.29
   1  -2  21   -8.82    9.22
   1  -2  22   11.18    7.81
  -1   1  23   -4.39    7.06
  -1   1  23    5.73    5.48
  -1   1  22   -6.87    6.67
  -1   1  22   14.84    7.97
  -1   1  21   20.67    8.46
  -1   1  21   17.37    7.38
  -1   1  20    3.18    6.41
  -1   1  19   -0.46    5.33
  -1   1  18    1.04    6.18
  -1   1  17   19.35    6.93
   1  -1 -15   12.80    2.14
   1  -1 -14    3.07    1.60
  -1   1  14    8.17    4.17
   1  -1 -13    1.41    1.50
  -1   1  13    2.70    3.34
  -1   1  12  213.13   11.71
   1  -1 -12  202.37    6.52
  -1   1  11   56.07    6.18
  -1   1  11   56.71    4.61
   1  -1 -11   54.09    3.39
  -1   1  10  140.73    8.84
  -1   1  10  142.37    6.63
   1  -1 -10  133.02    5.03
  -1   1   9   52.71    5.65
  -1   1   9   53.12    4.18
   1  -1  -9   46.02    2.93
  -1   1   8  204.88    9.53
   1  -1  -8  197.20    5.58
  -1   1   8  194.19    6.38
  -1   1   7    2.15    2.95
  -1   1   7    1.59    1.63
   1  -1  -7    0.79    1.09
  -1   1   7    5.54    3.93
   1  -1  -6   26.75    2.09
  -1   1   6   28.47    3.90
  -1   1   6   27.38    2.38
  -1   1   6   29.23    5.14
  -1   1   5   21.93    3.64
   1  -1  -5   20.89    1.92
  -1   1   5   16.68    4.55
  -1   1   5   23.26    2.10
  -1   1   4 1305.63   12.75
   1  -1  -4 1325.52   12.32
   1  -1  -3   21.28    2.01
  -1   1   3   19.81    1.84
  -1   1   2 1248.92   12.32
  -1   1   0  562.55    9.11
   1  -1   0  575.16    9.92
   1  -1   0  575.12    6.95
  -1   1  -1   59.87    3.18
   1  -1   1   62.07    3.40
   1  -1   1   64.29    3.57
  -1   1  -2    9.83    2.01
   1  -1   2   12.40    2.13
   1  -1   3  101.61    5.06
  -1   1  -3   96.74    4.71
   1  -1   4  438.32   10.67
  -1   1  -4  499.86   11.33
   1  -1   5   31.83    3.90
  -1   1  -5   31.02    4.19
  -1   1  -5   29.86    3.44
   1  -1   6   99.80    6.55
  -1   1  -6   97.31    6.74
  -1   1  -6   99.31    5.89
   1  -1   7   45.49    5.38
  -1   1  -7   36.87    5.32
  -1   1  -7   46.72    4.66
  -1   1  -8  243.49   12.30
  -1   1  -9    4.94    3.96
  -1   1  -9    9.57    3.17
  -1   1 -10  286.39   12.98
  -1   1 -10  269.28   14.44
  -1   1 -11   35.78    6.00
  -1   1 -11   38.30    6.80
  -1   1 -12    6.98    5.46
  -1   1 -12    6.98    4.55
  -1   1 -13    3.41    5.16
  -1   1 -14   72.43   10.44
   1  -1  15   15.00    6.55
  -1   1 -15   10.98    6.89
   1  -1  16    5.29    4.68
  -1   1 -16   11.62    6.71
   1  -1  17   24.04    6.64
   1  -1  18    7.41    5.93
   1  -1  19    2.19    7.08
   1  -1  20   11.94    6.97
   1  -1  21   15.85    8.54
   1  -1  22  -14.98    8.86
  -1   0  22   -3.77    7.18
  -1   0  22   13.10    5.90
  -1   0  21   11.72    7.98
  -1   0  21    2.64    5.47
  -1   0  20   13.97    5.85
  -1   0  20   18.88    9.21
  -1   0  19    3.08    5.14
  -1   0  18   16.13    6.44
  -1   0  17   -6.55    4.80
  -1   0  16    0.38    4.89
   1   0 -15   -1.53    2.65
  -1   0  15    1.45    4.01
   1   0 -14   -2.98    2.83
  -1   0  14    4.26    3.73
   1   0 -13   13.26    6.19
   1   0 -13   10.79    3.21
  -1   0  13   20.67    5.06
   1   0 -12   -4.89    6.31
   1   0 -12   -0.99    2.39
  -1   0  12   -0.84    3.84
  -1   0  11  107.53    8.32
   1   0 -11  102.77    6.42
   1   0 -11  104.87   10.73
  -1   0  10   11.22    3.49
   1   0 -10    3.45    4.36
   1   0 -10   11.72    2.68
  -1   0  10   13.66    3.85
   1   0  -9   53.09    7.50
   1   0  -9   55.68    4.47
  -1   0   9   58.69    5.30
  -1   0   9   46.50    5.09
   1   0  -8  888.63   23.98
   1   0  -8  903.43   15.74
  -1   0   8  912.36   18.26
  -1   0   8  895.50   19.23
  -1   0   7   31.00    4.60
   1   0  -7   38.59    5.65
  -1   0   7   42.05    4.65
   1   0  -7   36.00    3.68
  -1   0   7   34.24    3.91
   1   0  -6    7.32    4.16
  -1   0   6    7.90    3.53
  -1   0   6    7.57    2.59
   1   0  -6    4.37    2.02
  -1   0   6    5.82    2.77
  -1   0   5   20.38    3.22
  -1   0   5   21.83    2.93
   1   0  -5   24.06    2.80
  -1   0   5   25.17    3.80
   1   0  -5   20.87    3.73
  -1   0   4  937.91   14.87
  -1   0   4  978.63   13.51
   1   0  -4  968.33   13.34
   1   0  -4 1038.13   17.81
  -1   0   4 1033.88   17.21
   1   0  -3  121.85    4.64
  -1   0   3  107.53    4.49
   1   0  -3  104.66    5.51
  -1   0   3  121.14    5.54
   1   0  -2  705.83    9.81
  -1   0   2  717.86   10.28
   1   0  -2  774.40   11.12
  -1   0   2  795.09   10.76
   1   0  -1   23.72    2.13
  -1   0   1   25.34    2.13
   1   0  -1   29.85    1.90
  -1   0   1   31.46    1.79
   1   0   0  233.26    4.99
  -1   0   0  197.43    4.54
  -1   0   0  166.40    4.30
   1   0   0  249.71    6.20
  -1   0  -1   38.07    2.44
   1   0   1   32.98    2.44
  -1   0  -1   37.97    2.30
   1   0   1   35.22    2.22
  -1   0  -2   43.23    2.44
   1   0   2   36.92    2.63
  -1   0  -2   49.48    2.96
   1   0   2   40.87    3.20
  -1   0  -2   47.79    3.27
   1   0   3   -0.46    1.84
  -1   0  -3   -0.30    1.91
  -1   0  -3   -0.43    2.14
   1   0   3    1.36    1.90
   1   0   4  296.13    9.21
  -1   0  -4  287.95    9.69
   1   0   4  304.07    9.37
   1   0   5    1.18    2.66
  -1   0  -5    3.80    3.22
   1   0   5   -1.11    2.77
  -1   0  -5    1.35    2.19
  -1   0  -6  206.43   10.84
   1   0   6  222.96   10.31
  -1   0  -6  236.47    9.12
   1   0   6  204.91   10.00
  -1   0  -7   31.59    4.20
   1   0   7   34.85    4.68
  -1   0  -7   22.74    4.79
   1   0   7   31.10    4.59
   1   0   8  126.92    8.72
  -1   0  -8  129.44    9.92
   1   0   8  127.84    8.84
   1   0   9   68.20    6.22
   1   0   9   62.85    6.56
   1   0  10  668.97   18.35
   1   0  10  606.15   20.51
  -1   0 -10  642.10   23.02
  -1   0 -10  667.99   16.71
  -1   0 -11   -3.12    5.40
   1   0  11   -2.95    4.03
   1   0  11    4.76    3.48
  -1   0 -11   -0.57    3.06
   1   0  12   12.66    4.70
   1   0  12   10.56    3.67
  -1   0 -12   12.48    3.50
  -1   0 -13    7.07    3.30
   1   0  13    3.70    4.11
  -1   0 -14   12.58    3.74
   1   0  14    9.31    4.91
  -1   0 -15    1.70    3.20
   1   0  15   11.81    5.81
   1   0  16   52.74    8.81
   1   0  17   19.63    6.89
   1   0  18   54.70    9.81
   1   0  19   -5.38    5.33
   1   0  20   32.01    8.72
   1   0  21   33.34   10.35
   1   0  22    1.93    9.30
   1   0  23    0.93    7.10
  -1  -1  22   10.28    9.97
  -1  -1  22   -0.15    5.18
  -1  -1  21    5.98    6.97
  -1  -1  20   20.18    7.39
  -1  -1  19    7.35    5.53
  -1  -1  18   35.87    7.57
  -1  -1  17    2.21    4.65
  -1  -1  16   74.67    8.56
   1   1 -15   23.00    8.02
  -1  -1  15    7.86    5.04
   1   1 -14   11.70    5.79
  -1  -1  14    5.33    4.05
   1   1 -13    3.12    5.49
  -1  -1  13   -4.38    3.93
   1   1 -12    9.63    4.63
   1   1 -12   16.84    4.13
  -1  -1  12   21.13    4.76
   1   1 -11    4.35    4.10
   1   1 -11    9.33    3.33
  -1  -1  11    9.25    3.99
   1   1 -10  188.69   12.35
   1   1 -10  190.63   10.12
  -1  -1  10  181.39   11.15
  -1  -1  10  198.43   10.53
   1   1  -9   66.70    7.55
   1   1  -9   80.77    6.62
  -1  -1   9   77.67    7.21
  -1  -1   9   75.68    6.52
   1   1  -8  149.47   10.17
  -1  -1   8  144.10    8.31
   1   1  -8  162.08    8.87
  -1  -1   8  149.93    9.55
  -1  -1   7    8.20    3.60
  -1  -1   7    1.33    2.88
   1   1  -7    4.08    3.62
   1   1  -7    1.41    2.67
  -1  -1   7    6.03    2.56
   1   1  -6 1932.42   28.69
  -1  -1   6 1923.46   28.01
  -1  -1   6 1903.18   24.85
   1   1  -6 1945.93   27.34
  -1  -1   6 1961.94   29.42
   1   1  -5    0.29    2.75
  -1  -1   5    2.21    2.64
   1   1  -5    2.33    2.63
  -1  -1   5    5.53    3.38
  -1  -1   5   -0.08    2.01
  -1  -1   4  642.36   13.98
   1   1  -4  611.52   14.85
  -1  -1   4  641.92   14.89
  -1  -1   4  626.59   12.45
   1   1  -3  199.14    7.19
  -1  -1   3  208.85    7.59
  -1  -1   3  186.75    6.32
   1   1  -3  206.61    8.07
  -1  -1   3  196.92    8.22
  -1  -1   2   18.59    3.44
   1   1  -2   21.12    3.47
  -1  -1   2   23.55    2.99
   1   1  -2   17.77    2.77
   1   1  -1    3.38    2.14
  -1  -1   1    1.67    2.08
   1   1  -1    0.88    1.81
  -1  -1   1    0.35    1.94
   1   1   0   15.59    2.52
  -1  -1   0   19.17    2.43
   1   1   0   21.93    2.65
  -1  -1   0   20.98    2.54
   1   1   1   18.53    2.18
  -1  -1  -1   15.20    2.12
   1   1   1   11.99    2.73
  -1  -1  -1   18.17    2.94
  -1  -1  -1   17.13    2.81
   1   1   1   14.42    2.75
   1   1   2 8376.71   34.11
  -1  -1  -2 8433.16   32.83
   1   1   2 8444.35   38.50
  -1  -1  -2 8433.22   39.11
  -1  -1  -3  589.65    8.25
   1   1   3  582.03    8.11
   1   1   3  588.20   11.37
  -1  -1  -3  584.59   11.55
  -1  -1  -4  928.06    9.74
  -1  -1  -4  895.09   12.99
   1   1   4  938.51    9.65
   1   1   5  382.10   11.17
  -1  -1  -5  382.27   11.22
  -1  -1  -5  360.43    6.01
  -1  -1  -5  375.76    9.82
  -1  -1  -6   88.14    2.93
   1   1   6   84.98    7.81
  -1  -1  -6   89.75    6.12
   1   1   6   80.63    5.89
  -1  -1  -6   87.77    5.47
  -1  -1  -7   42.65    2.24
  -1  -1  -7   35.80    4.14
   1   1   7   33.55    4.03
   1   1   7   40.34    4.71
   1   1   7   34.77    5.83
  -1  -1  -8   83.98    3.10
   1   1   8   86.20    7.24
   1   1   8   73.99    8.31
   1   1   8   88.41    6.09
  -1  -1  -8   81.26    6.08
  -1  -1  -9    1.90    1.17
  -1  -1 -10  239.56    5.73
  -1  -1 -10  250.95    7.94
   1   1  10  259.88   11.68
   1   1  11   87.04    8.21
  -1  -1 -11   90.54    5.03
   1   1  11   99.23    7.57
   1   1  12   41.03    6.25
   1   1  12   41.91    5.49
  -1  -1 -12   48.10    4.09
  -1  -1 -13   26.81    3.06
   1   1  13   34.59    5.79
   1   1  14   11.06    4.46
  -1  -1 -14   11.18    2.51
  -1  -1 -14   13.41    1.94
   1   1  14    9.69    5.01
   1   1  15   -0.46    3.50
   1   1  15   -0.86    4.60
  -1  -1 -15    1.73    1.80
  -1  -1 -15    1.40    1.47
  -1  -1 -16    5.83    1.46
   1   1  16   10.74    5.27
   1   1  17    5.30    4.91
   1   1  18    2.79    5.79
   1   1  19    9.46    5.91
   1   1  20    4.63    5.99
   1   1  21    8.33    5.82
   1   1  22   10.66    7.82
   1   1  23    0.06    7.71
   1   2 -20    6.67    8.68
  -1  -2  20    1.44    4.92
   1   2 -19   19.01    9.83
  -1  -2  19    7.15    5.14
  -1  -2  18    4.29    4.96
  -1  -2  17    7.78    5.22
  -1  -2  16    8.33    4.37
  -1  -2  15   13.39    5.22
  -1  -2  14    3.26    3.96
  -1  -2  13   -3.30    4.55
   1   2 -12   -5.09    4.87
  -1  -2  12    0.43    3.89
   1   2 -11   14.34    5.43
  -1  -2  11   15.86    4.67
   1   2 -10    5.88    4.12
  -1  -2  10   13.35    4.06
   1   2  -9    2.27    3.42
  -1  -2   9   -0.77    3.15
   1   2  -8 1232.76   26.84
   1   2  -8 1251.67   27.15
  -1  -2   8 1208.55   29.69
  -1  -2   8 1157.18   22.42
   1   2  -7   25.97    4.99
   1   2  -7   31.29    5.14
  -1  -2   7   35.03    6.34
  -1  -2   7   37.56    4.74
  -1  -2   6   51.31    4.78
   1   2  -6   49.54    5.47
   1   2  -6   41.34    6.08
  -1  -2   6   42.80    6.51
  -1  -2   5   12.73    4.73
   1   2  -5   10.58    3.80
  -1  -2   5   11.44    3.39
  -1  -2   5   12.26    2.78
   1   2  -5   13.54    4.11
  -1  -2   4 1053.40   16.11
  -1  -2   4 1116.07   21.34
   1   2  -4 1153.62   20.20
   1   2  -4 1107.76   22.23
  -1  -2   4 1181.46   24.85
  -1  -2   3    1.62    1.85
  -1  -2   3   -7.82    4.03
   1   2  -3   -1.53    3.24
  -1  -2   3    0.30    2.74
   1   2  -3    1.88    2.83
  -1  -2   2  552.61    9.24
   1   2  -2  554.00   14.63
  -1  -2   2  596.47   16.13
   1   2  -2  613.18   13.77
  -1  -2   2  581.13   14.57
   1   2  -1   99.07    6.54
  -1  -2   1   83.78    6.52
  -1  -2   1   80.10    5.89
   1   2  -1   90.22    5.96
   1   2   0  305.92   10.05
  -1  -2   0  290.93   10.36
   1   2   0  271.20   10.11
  -1  -2   0  269.21   10.12
   1   2   1   51.33    4.68
   1   2   1   45.38    4.26
  -1  -2  -1   37.14    4.48
   1   2   1   36.41    4.72
  -1  -2  -1   36.96    4.89
  -1  -2  -2  967.46   17.97
   1   2   2  945.08   17.87
  -1  -2  -2  893.50   19.94
   1   2   2  865.16   19.48
   1   2   2  969.02   15.14
  -1  -2  -2  920.90   15.20
  -1  -2  -3 1445.46   13.99
  -1  -2  -3 1438.65   22.16
   1   2   3 1434.44   26.39
   1   2   3 1426.81   17.60
  -1  -2  -3 1445.54   18.16
   1   2   3 1480.82   18.91
  -1  -2  -3 1463.09   18.88
  -1  -2  -4 4220.03   27.91
   1   2   4 4241.79   34.28
  -1  -2  -4 4270.14   33.75
   1   2   4 4213.55   26.76
  -1  -2  -4 4257.51   29.02
  -1  -2  -5  356.59    9.27
  -1  -2  -5  362.64   10.64
   1   2   5  344.46   10.61
   1   2   5  360.70    7.27
  -1  -2  -5  333.83    7.46
  -1  -2  -6 2330.09   26.25
   1   2   6 2348.53   24.56
  -1  -2  -6 2270.40   17.50
   1   2   6 2295.63   15.71
   1   2   6 2273.18   28.61
  -1  -2  -6 2289.51   28.55
   1   2   7   74.93    2.56
   1   2   7   65.25    5.17
  -1  -2  -7   76.07    5.75
  -1  -2  -7   88.53    6.36
   1   2   7   86.93    6.60
  -1  -2  -7   80.57    3.12
   1   2   8  171.45    8.40
  -1  -2  -8  168.43    8.68
  -1  -2  -8  151.09    8.81
   1   2   8  146.22    8.87
   1   2   9   26.20    4.64
   1   2  10   59.86    5.97
   1   2  11    6.70    3.69
   1   2  11   10.10    3.21
   1   2  12   23.32    4.70
   1   2  12   27.25    5.33
   1   2  13   45.78    6.02
   1   2  13   46.20    6.75
   1   2  14  234.51   12.90
   1   2  14  214.69   13.82
   1   2  15   58.35    7.65
   1   2  15   68.64    8.72
   1   2  16   25.17    6.41
   1   2  16   21.55    5.76
   1   2  17    7.59    5.37
   1   2  18    8.53    5.25
   1   2  19    2.91    4.96
   1   2  20    0.42    5.74
   1   2  21    2.65    6.08
   1   2  22    4.71    5.96
   1   2  23    3.01    6.87
   1   3 -21   -4.03   10.09
   1   3 -20   19.64   11.54
   1   3 -19   -1.80    7.71
  -1  -3  18   -4.70    5.20
   1   3 -18    7.85    8.30
  -1  -3  17   -1.69    4.34
   1   3 -17    0.39    6.58
  -1  -3  16   -3.03    4.43
   1   3 -16   -4.69    5.68
  -1  -3  15   -0.42    4.65
  -1  -3  14   -1.10    4.46
  -1  -3  13   86.23    8.47
  -1  -3  12   67.57    7.63
  -1  -3  11    0.84    3.31
  -1  -3  10    4.72    3.08
  -1  -3   9   23.41    4.36
   1   3  -9   16.98    4.75
   1   3  -8  237.72   12.90
  -1  -3   8  277.14   11.41
  -1  -3   7    6.09    4.79
  -1  -3   7    6.41    2.70
   1   3  -7    2.07    3.60
   1   3  -6  264.22   12.48
  -1  -3   6  287.54   10.27
  -1  -3   5   12.11    5.26
  -1  -3   5   13.41    3.00
   1   3  -5   13.60    4.07
  -1  -3   4    0.26    4.14
   1   3  -4    3.73    3.54
  -1  -3   4    5.31    2.23
   1   3  -4    5.24    3.54
  -1  -3   3   11.33    2.01
  -1  -3   3   11.50    5.35
   1   3  -3   22.73    4.83
  -1  -3   3   13.85    3.89
   1   3  -3   15.85    4.03
  -1  -3   2  108.34    8.25
   1   3  -2  110.72    8.00
  -1  -3   2  103.59    4.06
  -1  -3   2   97.77    8.43
   1   3  -2   84.71    7.02
   1   3  -1  124.74    8.88
  -1  -3   1  118.43    8.63
  -1  -3   1  128.39    3.58
  -1  -3   1  121.94    9.65
   1   3  -1  135.88    9.12
  -1  -3   0  212.92   11.32
   1   3   0  220.64   10.90
  -1  -3   0  219.94   11.53
   1   3   0  225.78   10.66
  -1  -3  -1   26.82    5.32
   1   3   1   14.44    3.71
  -1  -3  -1   14.59    4.37
   1   3   1   12.04    3.93
  -1  -3  -2  122.80    3.01
   1   3   2  115.40    8.28
   1   3   2  109.17    8.71
  -1  -3  -2  105.98    9.11
  -1  -3  -2  120.02    8.10
   1   3   3  412.69   13.97
  -1  -3  -3  427.38    7.16
  -1  -3  -3  429.00   13.80
   1   3   3  451.79   17.46
  -1  -3  -3  429.74   11.59
   1   3   3  470.38   12.61
  -1  -3  -3  460.53   13.83
  -1  -3  -4 2543.15   34.94
  -1  -3  -4 2461.50   20.62
   1   3   4 2432.68   40.66
   1   3   4 2505.72   27.25
  -1  -3  -4 2479.95   30.50
  -1  -3  -4 2537.35   28.15
  -1  -3  -5   78.84    4.50
  -1  -3  -5   72.98    6.76
  -1  -3  -5   91.87    5.93
   1   3   5   79.67    5.71
   1   3   5   80.57    4.81
  -1  -3  -5   81.81    5.81
  -1  -3  -6    1.57    2.24
   1   3   6    3.31    2.74
  -1  -3  -6    1.99    2.53
  -1  -3  -6   -1.07    2.04
   1   3   6    2.21    1.83
   1   3   6    5.21    1.93
  -1  -3  -7   37.07    4.31
   1   3   7   24.77    3.83
   1   3   7   33.21    2.79
  -1  -3  -7   26.68    3.45
  -1  -3  -7   31.87    4.03
   1   3   7   26.79    3.62
   1   3   8  256.90   10.98
  -1  -3  -8  252.67   10.85
  -1  -3  -8  279.49   10.54
   1   3   8  270.87   10.15
   1   3   8  258.59    5.91
   1   3   9  191.73    8.97
   1   3   9  184.76   10.12
   1   3  10  764.80   18.75
   1   3  11   78.78    6.87
   1   3  11   90.62    8.25
   1   3  12   12.04    3.68
   1   3  12   16.23    4.89
   1   3  13    7.34    3.52
   1   3  13   -3.40    3.68
   1   3  14   24.95    5.13
   1   3  14   21.91    5.36
   1   3  15   24.51    5.58
   1   3  15   20.80    5.76
   1   3  16   13.28    5.18
   1   3  16    4.71    4.62
   1   3  17   78.46    8.83
   1   3  17   55.18    9.00
   1   3  18   15.07    5.92
   1   3  19   22.93    6.85
   1   3  20    8.83    5.14
   1   3  21   10.85    7.50
   1   3  22   32.25    8.45
   1   3  23   53.26   11.63
   1   4 -20    9.27   10.81
   1   4 -19   13.22    9.77
   1   4 -18   10.03    8.95
   1   4 -17   -2.52    6.63
   1   4 -16   -2.30    6.80
   1   4 -15    3.92    7.35
  -1  -4  15    6.72    3.99
   1   4 -14   -3.50    5.61
  -1  -4  14    5.43    4.34
   1   4 -13   -6.87    5.01
  -1  -4  13    1.17    4.22
  -1  -4  12   47.17    6.18
  -1  -4  11  145.67   10.02
  -1  -4  10    4.43    3.30
  -1  -4   9   21.97    4.42
  -1  -4   8   38.65    4.93
  -1  -4   7    2.17    2.61
  -1  -4   6   63.31    4.99
  -1  -4   5    9.01    5.83
   1   4  -5    6.67    4.21
  -1  -4   5    6.62    2.07
  -1  -4   4    0.80    5.02
   1   4  -4    7.82    4.70
  -1  -4   4    2.96    1.83
  -1  -4   3    5.67    4.58
   1   4  -3   14.05    4.58
  -1  -4   3   11.45    2.02
  -1  -4   2  226.66    5.53
  -1  -4   2  211.12   13.61
   1   4  -2  242.62   12.93
   1   4  -1    4.82    3.95
  -1  -4   1   16.38    5.40
  -1  -4   0  155.80   11.47
   1   4   0  183.92   10.79
   1   4   0  174.07   11.17
   1   4   1   52.25    6.38
  -1  -4  -1   50.12    6.92
   1   4   1   37.59    6.33
   1   4   2  124.18    8.91
   1   4   2  116.70    8.16
  -1  -4  -2  112.87    9.30
   1   4   2  102.55    9.65
  -1  -4  -2   92.07    9.83
   1   4   3   30.79    5.22
   1   4   3   35.08    4.98
  -1  -4  -3   34.36    5.80
   1   4   3   18.73    5.63
  -1  -4  -4  219.71    6.05
   1   4   4  234.63   12.32
  -1  -4  -4  206.68    8.93
   1   4   4  210.85   13.86
   1   4   4  234.02   10.33
  -1  -4  -4  212.35   11.78
  -1  -4  -5    0.52    3.54
   1   4   5   -8.47    5.90
  -1  -4  -5    0.60    2.24
  -1  -4  -5   -0.32    3.99
  -1  -4  -5   -0.97    1.65
   1   4   5   -0.27    2.44
  -1  -4  -6  298.14   14.25
  -1  -4  -6  270.61    8.89
   1   4   6  295.33   17.76
   1   4   6  282.69   10.50
  -1  -4  -6  280.14   12.14
  -1  -4  -6  281.06   10.71
   1   4   7   90.31    6.60
  -1  -4  -7   87.37    6.35
   1   4   7   89.99    5.57
  -1  -4  -7   83.04    7.85
   1   4   7   86.54    5.13
  -1  -4  -7   89.13    5.62
  -1  -4  -8    8.61    2.89
   1   4   8   13.06    3.68
  -1  -4  -8    9.69    4.45
   1   4   8   10.92    2.42
  -1  -4  -8   10.72    3.12
   1   4   8    8.25    2.65
   1   4   9  214.40    9.38
   1   4   9  191.15   10.36
   1   4   9  215.92    7.01
   1   4  10  354.78    7.08
   1   4  10  359.71   12.73
   1   4  11   15.53    4.11
   1   4  11    8.86    3.24
   1   4  12    8.18    3.76
   1   4  12   11.54    3.59
   1   4  13    6.85    4.03
   1   4  13    4.63    3.60
   1   4  14    4.40    4.11
   1   4  14    3.87    3.57
   1   4  15   12.16    5.27
   1   4  15   11.08    4.14
   1   4  16    8.63    4.23
   1   4  16    3.76    3.38
   1   4  17   59.19    8.33
   1   4  17   49.26    8.58
   1   4  18  172.59   14.50
   1   4  19   96.87   12.14
   1   4  20    5.12    5.69
   1   4  21    3.48    6.50
   1   4  22   27.63    9.13
   1   4  23    4.02    6.83
   1   5 -18    7.36    8.60
   1   5 -17   -1.29    7.13
   1   5 -16    1.01    6.77
   1   5 -15   16.20    7.80
   1   5 -14   20.52    7.15
   1   5 -13    3.38    4.81
   1   5 -12    3.25    4.89
   1   5 -11   -3.01    4.54
   1   5 -10  135.39   12.01
   1   5  -9   -0.45    4.51
   1   5  -2  295.98   15.73
   1   5  -1  195.41   13.75
   1   5   0  919.00   27.28
  -1  -5   0  876.89   28.76
  -1  -5  -1   60.21    8.74
   1   5   1   61.03    8.18
   1   5   2  322.89   17.46
  -1  -5  -2  346.98   17.45
   1   5   2  363.86   16.31
   1   5   3  133.84   12.19
   1   5   3  167.16   11.57
   1   5   4   -0.67    3.74
  -1  -5  -4    1.30    2.56
   1   5   4    2.60    3.06
   1   5   4    1.72    5.89
   1   5   5  239.12   11.78
   1   5   5  232.18   16.15
  -1  -5  -5  222.40    9.97
   1   5   6  698.93   28.55
  -1  -5  -6  689.76   17.58
   1   5   6  712.74   19.09
  -1  -5  -6  729.65   21.68
   1   5   7  336.25   20.89
  -1  -5  -7  291.44   11.88
   1   5   7  308.35   11.94
  -1  -5  -7  317.10   15.05
   1   5   8  264.69   10.72
   1   5   8  278.58   19.76
  -1  -5  -8  296.07   15.27
   1   5   9    8.49    8.05
  -1  -5  -9    8.98    4.76
   1   5   9   11.19    3.26
  -1  -5  -9    8.28    3.08
   1   5   9    8.48    2.41
  -1  -5 -10  155.01   11.79
   1   5  10  146.45    9.75
   1   5  10  145.56    6.81
  -1  -5 -11  150.82   12.39
   1   5  11  162.38    9.25
   1   5  11  171.04   10.84
   1   5  11  182.88    6.44
   1   5  12    7.23    3.36
   1   5  12    9.70    1.50
   1   5  12    4.94    3.17
   1   5  13    7.12    4.41
   1   5  13    8.64    3.47
   1   5  14    6.84    4.31
   1   5  14    8.59    4.06
   1   5  15   22.32    6.04
   1   5  15   16.57    4.52
   1   5  16   51.32    7.20
   1   5  16   60.91    8.78
   1   5  17   48.77    8.22
   1   5  18   23.33    7.05
   1   5  19    0.32    5.22
   1   5  20    5.36    5.43
   1   5  21    8.60    7.07
   1   5  22    0.61    5.66
   1   6 -17   -4.92    6.87
   1   6 -16   43.81   11.08
   1   6 -15   19.96    7.59
   1   6 -14   18.91    8.60
   1   6 -13   -4.08    5.44
   1   6 -12   -3.94    5.51
   1   6 -11    9.74    5.75
   1   6 -10    2.82    4.50
   1   6  -9   -1.58    5.61
   1   6  -8  161.01   13.11
   1   6  -7    3.32    5.17
   1   6  -6   -4.75    5.11
   1   6   1   33.77    7.52
   1   6   2   46.48    8.37
   1   6   3   -3.65    5.78
   1   6   4    8.62    6.27
   1   6   5   62.60   10.11
   1   6   6    7.70    6.98
   1   6   7   17.58    8.69
  -1  -6  -8   -3.34    4.82
   1   6   8   -0.17    3.02
   1   6   8   -5.79    6.76
   1   6   9   19.31    4.51
  -1  -6  -9   21.28    6.10
   1   6   9   30.02    8.78
   1   6  10   31.64    4.34
  -1  -6 -10   37.90    7.32
   1   6  10   36.06   10.84
  -1  -6 -11    0.41    4.85
   1   6  11    0.93    2.27
   1   6  11    3.09    8.40
   1   6  12   61.46    4.80
  -1  -6 -12   51.07    8.54
   1   6  12   71.19   12.86
   1   6  13   42.31    6.74
  -1  -6 -13   31.85    7.28
   1   6  14   38.67    6.13
  -1  -6 -14   16.27    6.35
   1   6  15  107.37   10.38
  -1  -6 -15   69.28    9.90
   1   6  16   22.79    5.95
   1   6  17   47.73    7.89
   1   6  18   21.15    7.26
   1   6  19    4.36    5.55
   1   6  20   15.37    7.21
   1   6  21   51.81   10.31
   1   6  22    0.99    5.82
   1   7 -15   -8.32    8.14
   1   7 -14    0.73    6.41
   1   7 -13    2.10    5.36
   1   7 -12    5.38    5.85
   1   7 -11    0.66    6.68
   1   7 -10    5.24    5.86
   1   7  -9    4.97    5.52
   1   7  -8    1.04    4.85
   1   7  -7    6.18    5.54
   1   7  -6  244.46   16.96
   1   7  -5   25.69    6.69
   1   7  -4  257.58   18.86
   1   7  -3   57.69    9.47
   1   7   5   92.52   13.22
   1   7   6   -1.73    6.93
   1   7   7   -0.25    6.64
   1   7   8   -1.63    6.85
   1   7   9   28.83   11.29
   1   7  10   11.10    9.30
   1   7  11    9.07    8.00
  -1  -7 -11   12.70    5.59
   1   7  12    7.66    9.54
  -1  -7 -12    7.29    5.75
   1   7  13  220.40   22.63
  -1  -7 -13  203.25   15.35
   1   7  14   50.52   14.22
  -1  -7 -14   29.55    7.91
   1   7  15  153.54   20.30
  -1  -7 -15  139.78   13.75
  -1  -7 -16   28.95    7.90
  -1  -7 -17   -5.65    6.76
  -1  -7 -18   16.97    7.32
   1   7  18   10.37    5.08
  -1  -7 -19   12.20    7.92
   1   7  19    2.69    4.97
  -1  -7 -20   -2.62    7.33
   1   8 -13    6.58    6.00
   1   8 -12   -2.05    5.76
   1   8 -11    2.68    6.24
   1   8 -10   -1.55    6.02
   1   8  -9    7.94    6.59
   1   8  -8    6.99    6.50
   1   8  -7   19.90    7.63
   1   8  -6   66.52   10.44
   1   8  -5   29.67    8.97
   1   8  -4   13.15    6.69
   1   8  -3    4.10    5.37
   1   8  -2    8.13    6.72
   1   8  -1   33.01    8.26
   1   8   0   53.32   11.31
   1   8   1   35.25    8.72
   1   8   8   24.55    9.50
   1   8   9   38.52   13.15
   1   8  10   25.51   11.07
   1   8  11  143.90   18.11
   1   8  12    2.12    8.58
   1   8  13  116.89   18.48
  -1  -8 -14   23.81    7.03
   1   8  14   30.64   12.96
  -1  -8 -15    0.75    5.70
   1   8  15   11.04   11.40
  -1  -8 -16   10.20    7.52
   1   8  16   12.60   11.33
   1   8  17   44.51   14.66
   1   8  18   20.08   16.15
   1   8  19  -19.23   15.01
   1   8  20  -29.36   15.42
   1   9 -11    1.17    6.85
   1   9 -10    5.43    6.33
   1   9  -9    1.77    6.39
   1   9  -8    1.98    6.97
   1   9  -7   18.81    8.74
   1   9  -6    3.04    7.54
   1   9  -5    1.53    6.92
   1   9  -4  -10.05    6.44
   1   9  -3   -4.94    5.97
   1   9  -2    1.60    6.12
   1   9  -1   29.97    9.14
   1   9   0   62.59   11.66
   1   9   1    3.28    7.82
   1   9   2    6.42    6.94
   1   9   3   -8.23    6.71
   1   9   4    6.25    7.37
   1   9  11   28.68   12.34
   1   9  12    9.86   11.20
   1   9  13   -1.38    9.87
   1   9  14    9.60   11.36
   1   9  15   40.30   15.09
   1   9  16    4.95   11.40
   1   9  17   11.79   12.64
   1   9  18   -3.69   11.80
   1  10  -8   23.44    8.95
   1  10  -7   10.57    7.57
   1  10  -6   -5.02    6.96
   1  10  -5   -9.11    7.51
   1  10  -4    6.98    7.23
   1  10  -3   11.04    6.34
   1  10  -2   20.30    8.80
   1  10  -1  -17.89   10.33
   1  10   0   10.24    7.01
   1  10   1   45.89   10.71
   1  10   2   -4.42    7.38
   1  10   3    1.52    7.93
   1  10   4   -7.08    8.66
   1  10   5   21.45   10.45
   1  10   6    6.38    8.28
   1  10   7   23.13    9.07
   1  10  14    0.91   10.92
   1  10  15   -9.07   13.77
   1  10  16   38.35   16.26
   1  11  -4    3.88    7.86
   1  11  -3   -6.32    8.09
   1  11  -2  -14.49    8.63
   1  11  -1   12.70   10.42
   1  11   0    0.49    7.98
   1  11   1   23.21    9.69
   1  11   2    2.15    7.12
   1  11   3   18.77   10.12
   1  11   4    0.34    8.40
   1  11   5   14.90    9.60
   1  11   6   -6.53    9.49
   1  11   7   59.97   14.92
   1  11   8   11.24   11.94
   1  11   9  -15.58   10.78
   1  11  10   24.84   11.57
  -2  11  11   13.41   12.42
  -2  11  10    4.73    9.74
  -2  11   9   -5.19   10.15
  -2  11   8  -19.43   10.35
  -2  11   7   17.60   10.97
  -2  11   6  -10.18    8.25
  -2  11   5   12.85    8.89
  -2  11   4   -1.21    8.73
  -2  11   3    8.78    8.28
  -2  11   2    9.79    8.83
  -2  11   1   29.35   10.10
  -2  11   0    5.47    6.96
  -2  11  -1   33.61   11.96
  -2  11  -2   -0.50    7.80
  -2  11  -3    8.10    8.23
  -2  10  15  128.99   23.15
  -2  10  14    2.68   10.56
  -2  10  13   33.83   13.10
  -2  10  12   -5.90    9.41
  -2  10  11   29.49   12.70
  -2  10  10    0.56   11.61
  -2  10   9    3.29    8.83
  -2  10   8   11.35    8.16
  -2  10   7    4.76    7.74
  -2  10   6    9.62    7.57
  -2  10   5   20.01    8.91
  -2  10   4    5.18    7.38
  -2  10   3   70.75   13.88
  -2  10   2    7.51    8.65
  -2  10   1  143.04   16.51
  -2  10   0  -18.40    8.92
  -2  10  -1   24.04    9.50
  -2  10  -2    1.14    8.45
  -2  10  -3   24.86    8.70
  -2  10  -4   30.41    9.79
  -2  10  -5    6.19    6.65
  -2  10  -6   16.83    8.51
  -2  10  -7   15.49    8.53
  -2   9  17  205.84   28.11
  -2   9  16    3.35   11.93
  -2   9  15    8.07   11.35
  -2   9  14   -7.01   10.44
  -2   9  13    7.45   10.57
  -2   9  12    7.06   10.52
  -2   9  11    2.79   10.45
  -2   9  10   31.74   12.00
  -2   9   9   22.55   12.02
  -2   9   8   19.94    8.39
  -2   9   7    8.79    8.53
  -2   9   6   16.34    9.31
  -2   9   5   78.84   12.84
  -2   9   4   78.83   13.51
  -2   9   3  209.91   18.86
  -2   9   2    6.95    7.43
  -2   9   1   32.28    9.34
  -2   9   0   -9.04    6.26
  -2   9  -1    9.21    6.33
  -2   9  -2    6.08    7.40
  -2   9  -3    8.82    6.51
  -2   9  -4    6.40    6.30
  -2   9  -5    8.47    7.01
  -2   9  -6    7.29    7.15
  -2   9  -7    7.17    6.68
  -2   9  -8    7.27    6.15
  -2   9  -9   -3.09    5.98
  -2   9 -10   15.25    7.96
  -2   8  19  106.60   12.00
  -2   8  19  152.82   24.76
  -2   8  18    8.67    4.82
  -2   8  18    6.87   13.05
  -2   8  17   -1.44    4.63
  -2   8  17  -10.12   10.54
  -2   8  16   -3.32    4.91
  -2   8  16    1.20   15.37
  -2   8  15   60.56    7.86
  -2   8  15   51.95   16.02
  -2   8  14    1.97    3.96
  -2   8  14   24.11   13.99
  -2   8  13   13.57    5.16
  -2   8  13   -0.17    8.98
  -2   8  12    3.99    3.73
  -2   8  12    6.49    8.45
  -2   8  11   25.76    4.53
  -2   8  11   45.13   13.77
  -2   8  10   20.62    4.43
  -2   8  10    6.56    8.06
  -2   8   9   54.87    5.85
  -2   8   9   65.72   13.41
  -2   8   8   30.54    4.63
  -2   8   8   30.21   10.93
  -2   8   7  279.44   22.29
  -2   8   6  593.63   16.34
  -2   8   6  521.42   29.91
  -2   8   5 1230.32   42.75
  -2   8   4   40.57   10.25
  -2   8   3   45.14   10.23
  -2   8   2    7.81    5.67
  -2   8   1    2.41    6.36
  -2   8   0   35.05    8.79
  -2   8  -1   14.62    7.15
  -2   8  -2   44.16    9.89
  -2   8  -3   17.47    6.65
  -2   8  -4   23.97    7.71
  -2   8  -5    3.71    5.95
  -2   8  -6   30.37    7.43
  -2   8  -7   -2.22    5.25
  -2   8  -8   -0.04    5.65
  -2   8  -9    3.60    5.39
  -2   8 -10    3.31    5.62
  -2   8 -11    5.86    5.47
  -2   8 -12   14.93    7.06
  -2   8 -13    6.98    6.38
  -2   7  20   38.06    8.95
  -2   7  19   15.18    7.02
  -2   7  18   -7.01    5.85
  -2   7  17   39.72    7.33
  -2   7  16   10.04    5.29
  -2   7  15  125.38   10.97
  -2   7  14   29.35    6.19
  -2   7  14   35.17   12.69
  -2   7  13    2.14    2.26
  -2   7  13    7.88    4.32
  -2   7  12   15.52    5.06
  -2   7  12   27.49   11.82
  -2   7  11   66.18   14.49
  -2   7  11   70.12    7.31
  -2   7  10   84.45   14.26
  -2   7  10   73.86    6.88
  -2   7   9  437.32   28.13
  -2   7   9  390.26   14.76
  -2   7   8  311.97   22.96
  -2   7   8  318.16   13.53
  -2   7   7  881.22   37.28
  -2   7   6  204.69   18.14
   2  -7  -6  104.68    3.92
  -2   7   5   10.76    7.33
   2  -7  -5    4.25    1.67
  -2   7   4  319.70   21.07
   2  -7  -4  288.86    8.28
  -2   7   3   21.33    8.11
  -2   7   3   12.00    3.53
  -2   7   2   32.67    8.46
  -2   7   1   11.94    5.86
  -2   7   0    1.81    5.27
  -2   7  -1    4.84    5.71
  -2   7  -2   29.37    7.81
  -2   7  -3    8.62    5.24
  -2   7  -4   29.29    7.00
  -2   7  -5   28.67    6.83
  -2   7  -6   40.35    7.78
  -2   7  -7   -6.32    6.16
  -2   7  -8   -0.82    4.84
  -2   7  -9   17.35    6.23
  -2   7 -10    5.67    5.66
  -2   7 -11   10.49    5.98
  -2   7 -12    9.26    5.84
  -2   7 -13   14.87    6.70
  -2   7 -14    6.77    7.31
  -2   7 -15   10.91    7.04
  -2   6  21   11.54    6.64
  -2   6  20   -7.21    5.95
  -2   6  19   18.75    7.13
  -2   6  18   -7.72    5.96
  -2   6  17    7.87    5.01
  -2   6  16    4.01    4.22
  -2   6  15    5.77    4.57
  -2   6  14   36.60    4.51
   2  -6 -14   26.80    5.23
  -2   6  14   39.40    6.45
  -2   6  13   18.03    4.92
   2  -6 -13   10.48    3.88
  -2   6  13   14.78    3.04
  -2   6  12    4.52    3.87
  -2   6  12    0.78    2.10
   2  -6 -12    1.69    2.96
  -2   6  11  172.82   10.81
  -2   6  11  181.94   19.09
  -2   6  11  155.73    8.01
  -2   6  10  367.18   15.19
  -2   6  10  378.46   26.27
  -2   6   9  531.21   17.63
  -2   6   9  501.57   28.42
  -2   6   8  159.51    9.45
  -2   6   8  151.33   16.05
  -2   6   7   34.70    9.15
  -2   6   6    1.28    5.73
  -2   6   5   11.38    7.04
   2  -6  -5    3.50    1.15
  -2   6   4  109.80   12.67
   2  -6  -4   88.31    3.81
  -2   6   3    2.93    2.56
  -2   6   3   -1.04    5.49
  -2   6   2   98.61   10.50
  -2   6   1   23.40    5.96
  -2   6   0    2.44    4.77
  -2   6  -1    3.67    5.37
  -2   6  -2   32.41    6.72
  -2   6  -3   19.28    5.63
  -2   6  -4    1.92    4.03
  -2   6  -5   19.77    6.70
  -2   6  -6   22.05    6.29
  -2   6  -7  129.82   12.13
  -2   6  -8   14.59    6.56
  -2   6  -9    1.46    4.14
  -2   6 -10   -2.58    4.88
  -2   6 -11   -5.99    5.58
  -2   6 -12   -4.60    4.99
  -2   6 -13    4.45    5.91
  -2   6 -14    5.37    5.55
  -2   6 -15  -12.21    7.76
  -2   6 -16   -4.21    6.98
  -2   6 -17  -12.14    7.64
  -2   5  22   -6.78    7.15
  -2   5  21    7.52    6.46
  -2   5  20   -0.70    5.22
  -2   5  19    7.96    6.60
  -2   5  18   43.27    8.32
  -2   5  18   30.28    6.57
  -2   5  17    0.95    5.26
  -2   5  17    0.90    4.34
  -2   5  16   52.21    6.68
  -2   5  16   72.24    8.83
  -2   5  15   -0.77    4.44
  -2   5  15   -2.85    3.44
  -2   5  14  190.74   12.46
  -2   5  14  155.46    9.53
  -2   5  13  159.43    8.70
  -2   5  13  175.33    6.86
  -2   5  12  414.16   12.73
  -2   5  12  406.01   11.03
  -2   5  11  294.55    9.72
  -2   5  11  311.65    9.88
  -2   5  11  310.41   14.23
  -2   5  10  120.48    8.99
  -2   5  10  111.83    6.21
  -2   5   9   30.67    5.36
  -2   5   9   25.35    3.61
  -2   5   8   54.88   10.15
  -2   5   7    8.12    6.63
  -2   5   6  164.89   14.44
  -2   5   5   42.82    8.18
  -2   5   4   27.94    7.60
  -2   5   3   31.72    2.93
  -2   5   3   30.51    6.37
  -2   5   2    8.07    5.19
  -2   5   1  -10.18    4.66
  -2   5   0   67.66    8.11
  -2   5  -1   74.07    8.47
  -2   5  -2  326.95   15.82
  -2   5  -3   39.24    6.87
  -2   5  -4   31.51    5.99
  -2   5  -5   62.85    8.01
  -2   5  -6   39.24    6.86
  -2   5  -7    3.61    4.11
  -2   5  -8    0.30    4.50
  -2   5  -9    1.36    3.90
  -2   5 -10    6.70    4.34
  -2   5 -11   12.57    5.17
  -2   5 -12    9.22    4.73
  -2   5 -13   -5.03    4.90
  -2   5 -14   -3.39    5.44
  -2   5 -15   13.27    8.15
  -2   5 -16    8.90    7.05
  -2   5 -17   -3.23    7.30
   2  -5  17   -7.11    7.59
  -2   5 -18   20.43    9.27
   2  -5  18   29.06   10.13
  -2   4  22    2.86    6.96
  -2   4  21    3.04    5.55
  -2   4  21    1.33    5.15
  -2   4  20    0.15    5.50
  -2   4  20   -1.51    4.69
  -2   4  19   20.47    6.43
  -2   4  19   29.24    7.17
  -2   4  18   -3.89    5.05
  -2   4  18    2.94    3.97
  -2   4  17   81.39    9.09
  -2   4  17   89.59   10.18
  -2   4  16    7.69    5.11
  -2   4  16   -0.97    4.13
  -2   4  15   51.83    7.43
  -2   4  15   60.62    7.09
  -2   4  14  567.96   18.52
  -2   4  14  675.20   22.81
  -2   4  13  262.92   12.13
  -2   4  13  259.66   14.42
  -2   4  13  260.72    7.41
  -2   4  12  238.20    7.81
  -2   4  12  247.40   13.17
  -2   4  11   10.92    2.41
  -2   4  11   11.72    3.03
  -2   4  11   18.59    4.40
  -2   4  10   51.84    4.04
  -2   4  10   55.53    6.58
  -2   4  10   48.11    4.34
  -2   4   9   21.17    2.95
  -2   4   9   30.57    5.24
  -2   4   9   27.30    2.97
  -2   4   8   82.24    5.28
  -2   4   8   95.98    4.27
   2  -4  -7    3.89    1.77
  -2   4   4   57.36    7.74
  -2   4   3    7.42    4.14
  -2   4   2  246.23   13.79
   2  -4  -1   68.33    8.01
  -2   4   1   79.50    7.96
   2  -4   0  560.69   20.78
  -2   4   0  576.04   18.64
   2  -4   1  140.55   10.72
  -2   4  -1  162.54   10.03
  -2   4  -2 1057.66   24.16
   2  -4   2 1073.84   27.41
  -2   4  -3  291.73   12.68
  -2   4  -5    6.52    3.85
  -2   4  -6    2.11    3.36
  -2   4  -7   12.79    4.43
  -2   4  -8    2.72    3.41
  -2   4  -9    4.60    4.15
  -2   4 -10   85.98    9.11
  -2   4 -11    3.05    4.08
  -2   4 -12  419.53   20.71
  -2   4 -13   16.00    5.91
  -2   4 -14    2.89    5.46
  -2   4 -15   17.28    6.46
   2  -4  16   26.17    9.41
  -2   4 -16    9.36    6.16
   2  -4  17    7.27    7.23
  -2   4 -17    1.85    6.80
   2  -4  18   11.07    8.53
  -2   4 -18   13.25    8.57
   2  -4  19   -9.03    7.42
  -2   4 -19    9.96    7.29
  -2   3  22    2.68    5.96
  -2   3  22   -7.60    7.85
  -2   3  21    7.87    6.40
  -2   3  21    5.11    7.13
  -2   3  20    7.05    5.37
  -2   3  20   -4.37    5.33
  -2   3  19   20.41    6.83
  -2   3  19   20.91    6.03
  -2   3  18    9.47    5.32
  -2   3  18   -2.13    5.51
  -2   3  17   28.89    6.26
  -2   3  17   17.79    4.94
  -2   3  16  753.70   25.78
  -2   3  16  901.69   28.74
  -2   3  15  539.29   20.77
  -2   3  15  655.11   23.76
  -2   3  14  311.20   14.79
  -2   3  14  324.19   16.10
  -2   3  14  308.13    8.11
  -2   3  13   -3.77    3.77
  -2   3  13    0.75    1.91
  -2   3  13    4.71    3.89
  -2   3  12   27.22    4.71
  -2   3  12   21.66    2.93
  -2   3  12   29.52    5.17
  -2   3  11    2.40    2.63
  -2   3  11    2.17    1.66
  -2   3  11    5.55    3.77
  -2   3  10  133.28    9.51
  -2   3  10  135.17    6.11
  -2   3   9   52.47    4.54
  -2   3   9   59.29    4.14
  -2   3   9   54.59    6.52
  -2   3   8   64.70    4.35
  -2   3   8   74.19    4.59
  -2   3   7  110.79    4.69
  -2   3   7  115.92    5.74
  -2   3   6  275.81    5.74
  -2   3   6  277.92    8.85
  -2   3   5   -0.62    1.75
  -2   3   3   42.66    6.11
  -2   3   2  725.47   19.98
   2  -3  -1   48.61    2.91
   2  -3  -1   57.48    6.82
  -2   3   1   54.78    6.21
   2  -3   0  342.95   14.03
  -2   3   0  301.20   11.72
   2  -3   1   75.57    6.99
  -2   3  -1   74.43    6.14
  -2   3  -2 1336.32   23.19
   2  -3   2 1435.20   26.25
   2  -3   3    0.61    3.20
  -2   3  -3    1.85    2.73
  -2   3  -4  471.40   14.25
   2  -3   4  443.70   15.44
  -2   3  -5    4.62    2.73
   2  -3   5   15.12    4.21
  -2   3  -7    4.26    2.86
  -2   3  -8  122.22    9.21
  -2   3  -9   -4.37    3.02
  -2   3 -10  119.98   10.19
  -2   3 -11   -2.15    4.46
  -2   3 -12    8.38    5.66
  -2   3 -13   40.59    7.77
   2  -3  14   35.28    7.92
  -2   3 -14   41.93    8.15
   2  -3  15    7.31    6.45
  -2   3 -15    7.40    6.50
   2  -3  16   11.51    7.29
  -2   3 -16   -7.00    7.21
   2  -3  17  -11.99    8.47
  -2   3 -17   -4.47    6.22
   2  -3  18   -5.66    7.60
  -2   3 -18  -12.25    9.01
   2  -3  19    1.62    6.67
  -2   3 -19   15.55    9.95
  -2   3 -20    2.53    7.91
  -2   2  22   -3.27    5.94
  -2   2  22  -13.85    7.73
  -2   2  21   24.34    7.88
  -2   2  21   12.69    6.54
  -2   2  20   58.61    9.75
  -2   2  20   36.10    7.84
  -2   2  19   30.93    7.53
  -2   2  19   16.96    6.64
  -2   2  18  178.46   15.18
  -2   2  18  220.73   15.38
  -2   2  17  130.57   12.38
  -2   2  17  168.76   13.00
  -2   2  16  389.00   19.97
  -2   2  16  478.97   21.14
  -2   2  15  144.48   11.54
  -2   2  14  123.71   10.21
  -2   2  14  117.02    6.71
  -2   2  13  147.33   11.23
  -2   2  13  131.87    7.14
   2  -2 -13  131.51    5.40
  -2   2  12   85.38    5.50
  -2   2  12   89.27    8.05
   2  -2 -12   88.14    4.50
  -2   2  11   19.34    3.23
  -2   2  11   11.66    3.97
   2  -2 -11   17.98    2.49
  -2   2  10   37.44    3.80
  -2   2  10   37.30    5.67
   2  -2 -10   34.64    3.15
  -2   2   9   52.94    4.18
  -2   2   9   58.31    6.34
  -2   2   8   27.33    3.04
  -2   2   8   29.48    4.51
  -2   2   7   44.04    3.71
  -2   2   6   95.59    5.03
  -2   2   5   32.47    3.08
  -2   2   4  222.34    7.56
  -2   2   3  182.55    7.03
  -2   2   2 2329.58   30.73
   2  -2  -1  165.11    4.25
  -2   2   1  176.91    8.15
   2  -2   0  660.73   10.39
  -2   2   0  682.73   13.50
   2  -2   1    6.42    2.08
   2  -2   1    8.33    3.11
  -2   2  -1   11.82    2.70
   2  -2   2   12.22    2.79
   2  -2   2    7.58    2.77
  -2   2  -2   10.34    2.56
   2  -2   3   65.30    5.44
  -2   2  -3   72.76    4.86
   2  -2   3   78.20    5.45
   2  -2   4  929.93   19.91
  -2   2  -4  934.19   16.72
   2  -2   4  892.54   17.82
  -2   2  -5    1.51    2.26
   2  -2   5    0.57    2.52
  -2   2  -6  240.83   10.80
   2  -2   6  258.86   10.99
  -2   2  -7    3.35    3.01
  -2   2  -9   10.79    4.46
   2  -2  10   38.42    6.70
  -2   2 -10   42.09    6.71
   2  -2  11    7.46    4.24
  -2   2 -11    7.91    4.01
   2  -2  12    4.67    6.03
  -2   2 -12    4.07    3.92
   2  -2  13    2.86    4.27
  -2   2 -13   15.46    6.03
   2  -2  14   33.94    8.00
  -2   2 -14   36.19    7.60
  -2   2 -15   19.87    6.97
  -2   2 -16    3.24    6.51
  -2   2 -17    9.28    7.49
   2  -2  17   -6.70    6.20
  -2   2 -18   11.61    7.96
   2  -2  18    2.96    6.25
   2  -2  19    1.69    6.09
   2  -2  20  -10.15    6.25
   2  -2  21   -0.80    6.94
  -2   1  22   32.43    8.07
  -2   1  22   29.45    9.06
  -2   1  21   -1.10    5.85
  -2   1  21   -0.71    6.37
  -2   1  20   95.67   11.98
  -2   1  20   70.60   11.91
  -2   1  19   -9.78    5.40
  -2   1  18   31.71    7.29
  -2   1  17    9.16    5.23
  -2   1  14   79.12    6.69
   2  -1 -14   60.41    4.69
  -2   1  13   17.68    4.35
   2  -1 -13   12.90    2.54
   2  -1 -12  156.79    7.13
  -2   1  12  175.13    9.11
   2  -1 -11   16.73    2.64
  -2   1  11   11.06    3.02
   2  -1 -10   -0.52    1.86
  -2   1  10    1.85    3.13
  -2   1  10   -2.00    2.41
  -2   1   9   14.97    3.23
   2  -1  -9   18.52    2.86
  -2   1   9   20.23    4.15
  -2   1   8  199.83    8.13
   2  -1  -8  193.92    7.25
  -2   1   8  219.25   10.68
  -2   1   7   39.05    3.68
   2  -1  -7   41.02    3.52
  -2   1   7   34.93    5.34
  -2   1   6  695.66   13.74
   2  -1  -6  662.22   12.26
  -2   1   6  685.11   18.80
  -2   1   5    2.86    2.00
   2  -1  -5    4.29    1.92
  -2   1   4 2592.45   24.92
   2  -1  -4 2595.83   24.54
  -2   1   3   76.98    4.49
   2  -1  -3   75.88    4.54
   2  -1  -2  838.31   13.86
  -2   1   2  823.05   13.50
  -2   1   1   58.25    4.12
  -2   1   1   60.61    3.12
  -2   1   1   60.06    3.89
  -2   1   0  618.78   12.00
   2  -1   0  606.71    9.90
  -2   1   0  587.12   10.22
  -2   1  -1    9.94    1.44
   2  -1   1   10.70    1.94
   2  -1   1    7.89    2.06
  -2   1  -1   10.84    2.24
   2  -1   2   90.85    3.97
  -2   1  -2   84.81    3.49
   2  -1   2   94.56    5.41
  -2   1  -2  101.88    5.79
   2  -1   3    8.94    2.97
  -2   1  -3    3.58    1.72
   2  -1   3    9.29    2.23
  -2   1  -3    5.87    3.05
  -2   1  -4  654.77   13.02
   2  -1   4  677.37   15.92
  -2   1  -5   43.56    4.30
   2  -1   5   36.21    3.67
   2  -1   5   41.03    5.26
  -2   1  -6   13.38    3.61
   2  -1   6   18.67    3.33
   2  -1   6   13.52    3.83
   2  -1   7   16.13    3.74
  -2   1  -7   15.39    3.67
   2  -1   7    9.48    3.97
  -2   1  -8   26.64    5.47
   2  -1   8   23.48    4.39
   2  -1   8   21.54    4.61
   2  -1   9   -1.12    3.75
   2  -1  10   48.00    6.72
  -2   1 -10   51.23    7.91
  -2   1 -11   17.14    5.69
  -2   1 -12   22.22    6.17
  -2   1 -13    1.51    5.09
   2  -1  13    1.94    4.19
  -2   1 -14   -2.94    5.46
   2  -1  14   -6.64    5.13
  -2   1 -15    1.42    5.71
   2  -1  15    4.70    4.90
   2  -1  16    1.82    4.81
   2  -1  17   14.13    7.62
   2  -1  18   20.47    6.85
   2  -1  19    7.71    7.63
   2  -1  20    1.81    8.71
   2  -1  21    3.43    7.83
   2  -1  22   -5.15    7.69
  -2   0  22   24.70    8.00
  -2   0  22   26.29    9.24
  -2   0  21   -7.82    6.53
  -2   0  20   75.05   10.43
  -2   0  19   20.83    6.82
  -2   0  18    9.54    5.75
  -2   0  17   -3.33    5.13
  -2   0  16   40.46    7.68
  -2   0  15    9.74    4.31
  -2   0  14    2.74    3.80
  -2   0  14    4.66    4.44
  -2   0  13    8.63    4.38
   2   0 -13    0.67    5.17
  -2   0  13   -1.69    3.92
   2   0 -13   -0.32    2.46
  -2   0  12    4.01    4.03
   2   0 -12    5.85    5.63
   2   0 -12    2.08    2.57
  -2   0  12    3.85    3.57
   2   0 -11    4.18    5.56
  -2   0  11    8.55    3.54
   2   0 -11    1.21    2.57
  -2   0  11   -4.66    4.22
  -2   0  10   19.01    4.89
   2   0 -10   24.78    3.48
  -2   0  10   23.10    4.69
   2   0 -10   19.05    4.64
   2   0  -9   31.78    6.58
   2   0  -9   33.90    4.06
  -2   0   9   34.63    4.55
  -2   0   9   41.88    5.71
  -2   0   8  548.01   16.76
   2   0  -8  545.25   13.71
  -2   0   8  513.43   14.84
  -2   0   7   16.97    4.17
   2   0  -7   18.94    3.45
  -2   0   7   15.77    3.93
   2   0  -7   16.36    4.01
  -2   0   7   13.59    3.46
  -2   0   6  351.75   10.99
   2   0  -6  388.37   11.07
   2   0  -6  367.58   13.68
  -2   0   6  344.59   12.45
  -2   0   5    0.40    2.27
   2   0  -5   -0.77    2.87
   2   0  -5    0.50    2.13
  -2   0   5    0.12    2.25
   2   0  -4  759.81   14.42
  -2   0   4  729.58   14.53
  -2   0   4  757.73   14.73
   2   0  -4  745.82   15.99
   2   0  -3    3.37    2.10
  -2   0   3    0.09    1.83
   2   0  -3   -0.84    2.29
  -2   0   3   -0.60    2.17
  -2   0   2  708.91   13.91
   2   0  -2  712.97   13.49
  -2   0   2  714.62   10.49
   2   0  -2  699.90   11.48
  -2   0   1  186.50    7.01
   2   0  -1  195.47    4.92
  -2   0   1  184.56    4.32
   2   0  -1  181.07    6.78
   2   0   0   10.01    2.65
  -2   0   0    9.40    2.24
  -2   0   0   11.13    2.70
  -2   0   0   17.96    3.90
   2   0   0   16.14    3.59
   2   0   1  375.76    9.42
  -2   0  -1  359.43    9.22
  -2   0  -1  390.39   11.12
   2   0   1  386.99    9.45
  -2   0  -1  384.99    9.21
   2   0   2  122.78    5.55
  -2   0  -2  116.49    5.29
  -2   0  -2  117.61    6.12
   2   0   2  118.05    6.40
   2   0   2  120.28    3.81
  -2   0  -3   92.18    4.82
  -2   0  -3  107.50    6.02
   2   0   3  103.24    6.09
   2   0   3  105.18    4.68
   2   0   4    4.07    2.70
  -2   0  -4    7.43    2.97
   2   0   4   10.22    2.59
  -2   0  -4    9.48    2.22
  -2   0  -5   -1.40    2.59
   2   0   5    2.50    2.98
  -2   0  -5   -0.04    1.68
   2   0   5    1.48    2.49
   2   0   6   75.04    6.13
   2   0   6   67.50    6.21
  -2   0  -6   74.68    6.99
  -2   0  -6   60.70    4.18
   2   0   7   16.39    3.76
   2   0   7   17.57    4.15
   2   0   8  156.43    9.45
   2   0   9  120.26    9.17
   2   0  10   31.20    5.88
   2   0  11    3.45    4.00
   2   0  12  322.04   16.94
   2   0  13   15.48    5.12
  -2   0 -14    2.60    4.40
   2   0  14    4.23    4.64
   2   0  15    9.11    4.87
   2   0  16   20.78    6.20
  -2   0 -17    4.03    2.30
   2   0  17   -0.79    6.69
   2   0  18    3.98    5.60
   2   0  19    8.93    6.52
   2   0  20    3.11    6.83
   2   0  21   -4.04    7.30
   2   0  22   13.62    9.33
  -2  -1  22   21.36    8.21
  -2  -1  21    9.51    6.74
  -2  -1  20   -7.15    6.05
  -2  -1  19    4.69    6.10
  -2  -1  18   12.45    6.02
   2   1 -17   -5.57    7.47
  -2  -1  17    2.30    5.04
  -2  -1  16   32.22    7.20
   2   1 -16   33.73    9.65
  -2  -1  15   -0.28    4.67
   2   1 -15    9.82    6.78
  -2  -1  14   29.33    5.72
   2   1 -14   26.34    7.33
  -2  -1  14   36.91    6.53
  -2  -1  13    2.29    3.92
  -2  -1  13    0.08    4.48
   2   1 -13   -1.12    5.41
   2   1 -12   27.08    7.33
  -2  -1  12   28.59    5.88
   2   1 -11    7.53    4.75
  -2  -1  11   18.66    4.98
  -2  -1  10  276.08   12.82
  -2  -1  10  294.23   14.59
   2   1 -10  246.72   14.56
   2   1  -9   26.12    5.61
   2   1  -9   20.07    3.99
  -2  -1   9   26.38    5.63
  -2  -1   9   15.89    3.92
   2   1  -8 1319.52   28.67
  -2  -1   8 1336.33   27.80
  -2  -1   8 1348.00   25.30
   2   1  -7   27.53    4.97
   2   1  -7   24.60    4.03
  -2  -1   7   21.89    4.15
  -2  -1   7   26.41    4.41
  -2  -1   6 1353.95   23.66
   2   1  -6 1418.17   24.44
  -2  -1   6 1365.83   25.20
  -2  -1   6 1361.93   24.17
   2   1  -6 1331.84   24.90
  -2  -1   5  283.45   11.44
   2   1  -5  272.19   11.16
   2   1  -5  261.74   10.25
  -2  -1   5  253.14    9.86
   2   1  -4   67.60    5.67
  -2  -1   4   60.91    5.82
   2   1  -4   62.18    4.98
  -2  -1   4   75.33    5.45
  -2  -1   3    0.43    2.75
   2   1  -3    2.33    2.56
  -2  -1   3    5.94    2.43
   2   1  -3    2.87    2.16
   2   1  -2  125.72    7.16
  -2  -1   2  115.43    6.64
   2   1  -2  124.38    5.39
  -2  -1   2  121.54    5.78
   2   1  -1   20.31    3.16
  -2  -1   1   19.34    3.39
   2   1  -1   23.08    2.79
  -2  -1   1   27.60    3.07
  -2  -1   0   91.75    5.85
   2   1   0   91.72    5.80
   2   1   0   87.56    7.52
  -2  -1   0   93.10    4.70
   2   1   0   96.42    4.72
  -2  -1  -1  445.36   11.59
   2   1   1  449.69   10.89
  -2  -1  -1  457.66   11.02
  -2  -1  -1  487.06   14.29
   2   1   1  422.73   13.60
  -2  -1  -1  454.20   10.48
   2   1   1  423.83    9.61
   2   1   2 9924.74   52.90
  -2  -1  -2 9999.00   52.96
   2   1   2 9881.07   51.20
   2   1   2 9957.01   48.57
  -2  -1  -2 9963.59   48.29
  -2  -1  -2 9984.81   61.85
  -2  -1  -3   44.13    3.61
   2   1   3   49.33    3.75
   2   1   3   47.62    4.72
  -2  -1  -3   46.32    4.27
  -2  -1  -4   51.21    3.74
   2   1   4   49.15    3.55
  -2  -1  -4   53.30    4.73
   2   1   4   52.33    4.96
  -2  -1  -5   -1.57    1.81
   2   1   5    0.11    1.60
   2   1   5   -2.58    2.45
  -2  -1  -5    3.05    2.86
  -2  -1  -6    1.06    1.47
  -2  -1  -6    2.91    2.47
   2   1   6    6.06    3.52
   2   1   7   -0.70    3.00
  -2  -1  -7    4.04    3.13
  -2  -1  -7   -0.34    2.22
  -2  -1  -7   -0.48    1.46
   2   1   7   -1.52    4.00
   2   1   8  312.08   14.44
  -2  -1  -8  333.51    8.22
  -2  -1  -9   79.62    4.29
   2   1   9   69.78    7.23
  -2  -1 -10  415.81    9.44
   2   1  10  370.07   15.62
  -2  -1 -11  143.13    5.72
   2   1  11  135.35   10.12
  -2  -1 -12   39.98    3.27
   2   1  12   31.96    6.36
  -2  -1 -13   81.81    4.54
   2   1  13   73.88    8.41
   2   1  14    5.21    4.48
  -2  -1 -14    2.10    2.95
  -2  -1 -14    4.27    1.84
   2   1  15   13.02    5.19
  -2  -1 -15    4.96    3.26
  -2  -1 -15    9.50    2.04
  -2  -1 -16   11.19    2.31
   2   1  16   14.42    6.12
   2   1  17    9.85    6.34
   2   1  18    1.20    5.50
   2   1  19   -3.97    5.70
   2   1  20   -4.67    7.76
   2   1  21    4.85    7.23
   2   1  22   -7.50    6.71
   2   1  23   13.56    9.04
  -2  -2  21   -4.40    6.81
   2   2 -20   20.99   10.63
  -2  -2  20   24.31    8.24
   2   2 -19   14.29    9.38
  -2  -2  19    4.64    5.42
   2   2 -18   -0.61    6.63
  -2  -2  18    2.05    4.99
   2   2 -17    7.63    6.26
  -2  -2  17    8.02    5.13
   2   2 -16   12.14    6.39
  -2  -2  16   10.61    4.57
   2   2 -15   20.71    7.61
  -2  -2  15    2.84    3.96
   2   2 -14   20.09    6.80
  -2  -2  14   29.67    6.33
  -2  -2  13    0.06    5.07
   2   2 -13    7.60    5.41
  -2  -2  13   11.79    4.72
  -2  -2  12    2.09    5.23
   2   2 -12   10.69    6.10
  -2  -2  12    8.32    4.46
  -2  -2  11   65.64    7.15
   2   2 -11   51.58    7.40
  -2  -2  11   72.66    9.10
  -2  -2  10   26.69    5.77
  -2  -2  10   37.43    5.25
   2   2 -10   29.01    5.81
   2   2  -9   54.18    6.64
  -2  -2   9   49.22    7.46
  -2  -2   9   52.88    5.78
   2   2  -8  261.35   13.06
  -2  -2   8  284.20   11.97
   2   2  -7  212.34   11.26
  -2  -2   7  224.87   10.12
   2   2  -6  328.21   12.84
  -2  -2   6  364.99   12.25
   2   2  -6  351.49   13.86
  -2  -2   6  389.44   16.04
   2   2  -5   23.77    4.38
  -2  -2   5   23.64    4.81
  -2  -2   5   26.10    3.90
   2   2  -5   17.82    4.54
  -2  -2   5   27.71    5.68
  -2  -2   4 1273.42   23.70
   2   2  -4 1308.02   25.28
   2   2  -4 1247.60   21.72
   2   2  -3  114.10    7.90
  -2  -2   3  100.86    7.84
  -2  -2   3  119.18    7.44
   2   2  -3  128.48    7.26
   2   2  -2  731.98   17.84
  -2  -2   2  768.99   19.02
   2   2  -2  781.67   16.09
  -2  -2   2  744.72   17.27
  -2  -2   1    3.87    3.07
   2   2  -1    1.57    2.41
   2   2  -1    3.16    2.85
  -2  -2   1    7.81    3.47
   2   2   0    6.00    3.66
   2   2   0    0.58    2.77
  -2  -2   0    1.31    2.82
   2   2   0   -0.56    2.38
  -2  -2   0    5.70    3.49
   2   2   1    6.92    3.98
  -2  -2  -1    6.76    3.33
  -2  -2  -1    4.82    2.80
   2   2   1    3.75    2.69
   2   2   1   11.07    3.72
  -2  -2  -2  105.36    6.42
  -2  -2  -2  113.07    6.48
   2   2   2  111.79    6.74
  -2  -2  -2  112.71    8.42
   2   2   2  115.52    8.41
   2   2   2  106.87    7.35
  -2  -2  -2  121.57    7.97
  -2  -2  -3  131.89    7.09
   2   2   3  139.81    6.82
  -2  -2  -3  138.60    6.91
  -2  -2  -3  153.24    9.54
   2   2   3  135.77    8.71
  -2  -2  -4 5906.09   54.91
  -2  -2  -4 5784.45   38.61
   2   2   4 5808.62   38.40
  -2  -2  -4 5842.22   46.05
  -2  -2  -5  101.94    5.31
   2   2   5  110.39    5.47
   2   2   5   94.79    6.80
  -2  -2  -5  106.19    6.81
   2   2   6  286.32    8.03
  -2  -2  -6  318.76    8.70
  -2  -2  -6  324.94   12.11
   2   2   6  301.48   11.87
  -2  -2  -7   15.32    2.55
  -2  -2  -7   20.89    3.59
   2   2   7   16.11    2.32
   2   2   7   17.17    3.93
  -2  -2  -7   16.02    3.73
  -2  -2  -8   68.79    4.07
   2   2   9    3.82    2.92
  -2  -2  -9    1.92    1.49
  -2  -2 -10  145.58    5.27
   2   2  10  134.13    9.84
   2   2  11    3.45    3.26
  -2  -2 -11    0.05    1.27
  -2  -2 -12  137.50    4.81
   2   2  12  136.11   10.92
   2   2  13    4.61    3.63
  -2  -2 -13    5.72    1.44
   2   2  14   90.19    9.87
  -2  -2 -14   71.28    4.16
  -2  -2 -14   80.90    3.27
  -2  -2 -15   24.62    2.10
  -2  -2 -15   25.13    1.77
   2   2  16   43.08    8.22
   2   2  17   11.00    5.77
   2   2  18    0.41    5.96
   2   2  19   -2.97    5.71
   2   2  20   19.87    7.69
   2   2  21    5.35    8.65
   2   2  22   16.57    8.67
   2   2  23    8.65    8.08
   2   3 -20    6.69    8.62
  -2  -3  20    4.08    6.71
   2   3 -19    6.78    8.75
  -2  -3  19    4.73    5.09
   2   3 -18  -17.12    9.02
  -2  -3  18   11.06    7.01
   2   3 -17    9.69    7.34
  -2  -3  17   -2.76    4.69
   2   3 -16    9.24    6.00
  -2  -3  16   15.49    6.12
   2   3 -15    4.06    7.06
  -2  -3  15    8.72    5.85
   2   3 -14   10.61    6.36
  -2  -3  14    9.83    4.51
   2   3 -13   21.24    6.43
  -2  -3  13   19.64    5.33
  -2  -3  12   87.94   12.04
   2   3 -12   77.07    9.18
  -2  -3  12   78.00    7.99
  -2  -3  11   16.25    6.72
   2   3 -11   13.60    5.07
  -2  -3  11   15.17    4.64
  -2  -3  10   27.51    6.44
  -2  -3  10   32.34    5.32
   2   3 -10   25.68    6.51
  -2  -3   9   35.48    7.02
   2   3  -9   27.97    6.03
  -2  -3   9   28.31    4.84
  -2  -3   8    5.74    5.73
   2   3  -8   -2.89    3.24
  -2  -3   8   -1.17    2.85
  -2  -3   7    2.26    4.70
   2   3  -7    5.05    4.09
  -2  -3   7    6.70    2.83
   2   3  -6  215.27   11.59
  -2  -3   6  238.24   14.43
  -2  -3   6  240.92    9.76
   2   3  -5   35.28    5.51
  -2  -3   5   43.71    7.41
  -2  -3   5   24.64    3.54
   2   3  -4  323.11   13.05
  -2  -3   4  301.90    9.87
  -2  -3   3    0.68    4.31
  -2  -3   3   -0.71    3.43
   2   3  -3   -2.55    3.32
   2   3  -2    4.06    3.42
  -2  -3   2    5.60    3.78
  -2  -3   2    7.29    3.59
   2   3  -2    8.30    3.54
  -2  -3   1   18.70    4.74
  -2  -3   1   16.79    4.29
   2   3  -1   12.93    3.99
   2   3  -1   11.78    3.99
   2   3   0   70.46    6.20
  -2  -3   0   58.85    6.17
  -2  -3   0   70.73    7.20
   2   3   0   71.70    6.44
   2   3   1    4.23    4.53
  -2  -3  -1   -1.19    3.86
   2   3   1    2.73    3.98
  -2  -3  -1    4.11    3.09
   2   3   1   -1.98    2.73
   2   3   2    6.17    5.02
  -2  -3  -2    5.92    4.47
  -2  -3  -2    9.63    4.10
   2   3   2    6.32    2.95
   2   3   2    5.78    4.51
  -2  -3  -3   46.74    4.78
   2   3   3   36.16    4.36
  -2  -3  -3   47.49    5.50
  -2  -3  -3   51.95    6.31
   2   3   3   36.55    5.97
   2   3   3   47.06    6.84
  -2  -3  -4  198.00    9.30
   2   3   4  215.16    9.04
  -2  -3  -4  208.15    9.15
  -2  -3  -4  229.90   12.17
   2   3   4  206.36   12.45
  -2  -3  -5   51.81    5.19
  -2  -3  -5   59.01    5.37
   2   3   5   51.08    4.80
  -2  -3  -5   52.69    6.84
  -2  -3  -5   47.13    3.70
   2   3   5   53.44    7.59
  -2  -3  -6  134.55    8.32
   2   3   6  136.69    8.30
  -2  -3  -6  121.19    9.74
  -2  -3  -6  130.39    6.35
  -2  -3  -6  129.05    7.10
   2   3   6  132.34    6.87
   2   3   7  118.45    8.17
  -2  -3  -7  128.86    6.90
   2   3   7  128.95    6.08
  -2  -3  -7  128.34    6.66
   2   3   8  175.26    6.62
  -2  -3  -8  169.88    7.27
  -2  -3  -8  153.83    8.09
  -2  -3  -9   71.25    4.45
   2   3   9   61.60    6.86
   2   3   9   75.90    4.17
  -2  -3 -10  100.64    4.85
   2   3  10   76.44    7.54
  -2  -3 -11   11.47    2.06
   2   3  11   11.92    4.78
   2   3  12  103.05    9.45
  -2  -3 -12  109.66    3.97
   2   3  13  136.26   11.57
   2   3  14   -0.40    4.18
   2   3  15    2.16    4.62
   2   3  16   13.45    5.49
   2   3  17   31.70    7.78
   2   3  18   13.45    6.92
   2   3  19    8.89    6.11
   2   3  20    0.37    5.93
   2   3  21    3.09    8.41
   2   3  22   34.07   10.14
   2   3  23   12.38    8.95
  -2  -4  19    4.80    5.78
   2   4 -19    7.29   10.20
  -2  -4  18    1.07    5.23
   2   4 -18   -3.83    7.34
  -2  -4  17    4.69    5.14
   2   4 -17  -10.46    7.12
  -2  -4  16    0.37    4.68
   2   4 -16  -14.43    7.90
  -2  -4  15   -6.93    4.63
   2   4 -15   -1.14    6.03
  -2  -4  14    8.16    4.35
   2   4 -14   19.70    7.20
  -2  -4  13   15.94    5.16
   2   4 -13   11.00    6.72
  -2  -4  12    6.77    4.03
   2   4 -12    8.13    5.19
   2   4 -11   83.51    9.78
  -2  -4  11   81.91    8.20
  -2  -4  10    7.87    7.02
   2   4 -10    0.18    4.32
  -2  -4  10   -0.11    3.29
  -2  -4   9    6.16    6.61
   2   4  -9   10.18    4.90
  -2  -4   9   -2.54    2.98
  -2  -4   8    2.90    5.38
   2   4  -8    1.90    3.90
  -2  -4   8    1.17    3.09
  -2  -4   7    3.00    5.33
   2   4  -7    9.94    3.76
  -2  -4   7    6.28    2.41
  -2  -4   6  131.80    7.34
   2   4  -6  121.33   10.27
  -2  -4   5   15.74    2.88
  -2  -4   5    9.13    6.28
   2   4  -5   23.37    5.08
  -2  -4   4   12.76    4.85
   2   4  -4   22.11    5.24
  -2  -4   4   17.44    3.01
  -2  -4   3    0.05    1.73
  -2  -4   3   -1.96    5.24
   2   4  -3    0.98    3.30
   2   4  -2  109.68    9.20
  -2  -4   2  107.53    4.78
  -2  -4   1    2.67    4.24
   2   4  -1   -0.83    4.52
   2   4   0  166.91   11.19
  -2  -4   0  160.94   11.97
  -2  -4  -1    4.86    5.08
   2   4   1   -2.74    4.04
   2   4   2  304.98   15.10
   2   4   2  359.76   16.82
   2   4   2  322.02   13.32
  -2  -4  -2  337.46   15.11
   2   4   3  176.72   12.35
   2   4   3  164.85    9.48
  -2  -4  -3  182.27   10.99
   2   4   3  170.41   11.93
   2   4   4   34.30    6.65
  -2  -4  -4   41.70    6.65
  -2  -4  -4   38.50    2.99
   2   4   4   37.38    6.74
   2   4   4   33.78    4.81
  -2  -4  -4   54.03    6.24
  -2  -4  -5  131.89    5.75
  -2  -4  -5  109.66    9.66
   2   4   5  119.97    7.80
  -2  -4  -5  130.28    8.66
   2   4   5  108.00   10.96
  -2  -4  -6  187.09   12.22
  -2  -4  -6  179.03    7.26
   2   4   6  192.19    9.46
  -2  -4  -6  215.96   10.62
   2   4   6  187.41   14.36
  -2  -4  -7  114.86   10.09
  -2  -4  -7  123.78    6.68
   2   4   7  110.78   11.45
   2   4   7  113.02    7.01
  -2  -4  -7  110.93    7.73
   2   4   8   69.13    7.15
  -2  -4  -8   68.11    5.59
  -2  -4  -8   66.34    8.27
  -2  -4  -8   69.36    6.28
   2   4   8   74.94    5.65
   2   4   9    0.85    3.01
   2   4   9   -1.23    1.73
  -2  -4  -9    3.43    3.03
  -2  -4 -10   30.69    4.04
   2   4  10   30.10    5.45
   2   4  10   26.84    3.08
  -2  -4 -11   33.36    3.91
   2   4  11   30.39    2.77
   2   4  11   22.41    4.77
   2   4  12    7.27    4.65
   2   4  13    1.48    4.43
   2   4  14    8.01    4.83
   2   4  15   10.77    5.37
   2   4  16   75.58    9.70
   2   4  17    3.28    4.67
   2   4  18   -0.05    5.18
   2   4  19    3.45    6.08
   2   4  20    4.96    5.44
   2   4  21   27.95    8.72
   2   4  22    2.79    6.16
   2   4  23   -4.38    7.42
   2   5 -18    2.21    7.69
   2   5 -17   -4.93    7.21
   2   5 -16   -7.80    6.78
  -2  -5  16   -5.37    4.43
   2   5 -15   17.16    8.04
  -2  -5  15    7.71    5.28
   2   5 -14    1.44    6.60
  -2  -5  14    1.83    4.10
   2   5 -13    3.80    6.76
  -2  -5  13    3.84    3.98
   2   5 -12   -1.30    4.97
  -2  -5  12    4.33    4.17
   2   5 -11   -5.76    5.20
  -2  -5  11    7.72    3.99
   2   5 -10    7.53    5.39
  -2  -5  10   10.57    4.11
   2   5  -9    2.54    4.42
  -2  -5   9    6.12    3.49
  -2  -5   8  164.82   16.37
   2   5  -8  143.49   11.85
  -2  -5   8  155.92    8.94
  -2  -5   7   17.14    6.68
   2   5  -7   15.35    5.51
  -2  -5   7   16.47    3.77
  -2  -5   6  187.79    8.69
   2   5  -6  186.43   13.02
  -2  -5   6  191.92   16.31
  -2  -5   5   12.28    2.75
  -2  -5   5   10.83    6.36
   2   5  -5    7.14    4.64
   2   5  -4   30.38    6.59
  -2  -5   4   22.09    7.05
  -2  -5   4   23.26    2.92
   2   5  -3   -0.38    3.71
  -2  -5   3    3.66    1.73
   2   5  -2   69.93    8.55
  -2  -5   2   70.98    3.57
  -2  -5   2   88.71   11.25
  -2  -5   1    2.76    5.10
   2   5  -1    5.10    4.68
  -2  -5   1    1.98    1.13
  -2  -5   0   97.30   10.50
   2   5   0   92.94    9.94
  -2  -5  -1  180.92   13.66
   2   5   1  184.59   13.08
  -2  -5  -2  573.32   22.21
   2   5   2  508.21   21.38
  -2  -5  -3  130.43    3.62
  -2  -5  -3  142.37   11.24
   2   5   3  120.53   11.34
  -2  -5  -4   89.97    3.82
  -2  -5  -4   86.22    8.91
   2   5   4   93.92   10.38
  -2  -5  -5   88.54    4.46
  -2  -5  -5   83.14    8.83
   2   5   5   70.99   10.04
  -2  -5  -6   72.75    4.40
  -2  -5  -6   88.60    9.15
   2   5   6   74.40    6.85
  -2  -5  -6   84.12    8.62
   2   5   6   79.02   10.88
  -2  -5  -7   31.13    3.51
  -2  -5  -7   29.52    6.10
   2   5   7   28.42    8.34
   2   5   7   28.50    4.83
  -2  -5  -7   27.35    5.80
  -2  -5  -8    3.70    4.18
   2   5   8   12.03    7.53
  -2  -5  -8    3.12    2.20
  -2  -5  -8   -0.70    4.89
   2   5   8    6.82    3.03
  -2  -5  -9   83.82    9.82
   2   5   9   89.17   12.95
   2   5   9   93.93    6.71
  -2  -5  -9  110.04    8.63
  -2  -5 -10   28.58    6.41
   2   5  10   27.37    5.40
   2   5  10   33.98    4.17
  -2  -5 -10   31.57    5.09
   2   5  11    4.82    4.25
  -2  -5 -11    2.19    4.85
   2   5  11    3.36    1.86
  -2  -5 -12   14.86    5.68
   2   5  12   23.23    2.73
   2   5  12   23.30    5.61
   2   5  13   65.79    8.29
   2   5  14   22.12    5.45
   2   5  15   44.93    7.88
   2   5  16    5.32    4.63
   2   5  17    9.16    5.66
   2   5  18   11.70    6.68
   2   5  19   52.69    9.23
   2   5  20   13.51    7.52
   2   5  21   26.72    8.55
   2   5  22    1.90    6.22
   2   6 -16    0.60    6.70
   2   6 -15   19.14    8.58
   2   6 -14   14.19    8.19
   2   6 -13    6.58    5.88
   2   6 -12    3.32    5.78
   2   6 -11    4.61    5.15
  -2  -6  10   11.65    3.52
   2   6 -10   12.68    6.20
  -2  -6   9   22.38    4.35
   2   6  -9   22.50    6.14
   2   6  -8  430.71   21.08
  -2  -6   8  390.23   13.49
   2   6  -7   11.23    6.40
  -2  -6   7    1.21    2.64
   2   6  -6   -4.60    5.58
  -2  -6   6   -0.40    2.11
  -2  -6   5    5.07    6.25
   2   6  -5   -5.03    4.79
  -2  -6   4   -7.86    7.69
   2   6  -4    4.26    4.76
   2   6  -3   18.64    5.34
  -2  -6   3   13.29    7.40
   2   6  -2    6.10    5.08
  -2  -6   2   15.22    7.61
  -2  -6   1   84.85   12.30
   2   6  -1   72.64    9.18
  -2  -6   0  234.41   17.03
   2   6   0  258.69   16.50
  -2  -6  -1  313.15   19.20
   2   6   1  317.41   18.39
  -2  -6  -2   46.70    9.00
   2   6   2   60.33    9.36
   2   6   3   11.06    6.33
  -2  -6  -3    4.18    5.70
  -2  -6  -4  244.10   16.22
   2   6   4  233.20   17.15
   2   6   5   13.43    7.09
  -2  -6  -5    8.68    5.09
  -2  -6  -6  204.04   14.05
   2   6   6  175.63   16.07
  -2  -6  -7   86.94    5.54
  -2  -6  -7   95.47    9.99
   2   6   7   94.99   12.49
  -2  -6  -8   -2.83    2.45
  -2  -6  -8   -4.87    5.34
   2   6   8    9.19    7.56
  -2  -6  -8   -1.34    3.94
  -2  -6  -9    4.54    5.01
  -2  -6  -9    3.74    2.82
   2   6   9   14.27   10.16
  -2  -6 -10   14.78    6.10
   2   6  10   10.59    3.54
   2   6  10   16.58    9.27
   2   6  11  139.40   17.10
  -2  -6 -11  147.94   13.70
   2   6  11  138.42    8.32
  -2  -6 -12   42.25    8.55
   2   6  12   43.59   12.10
  -2  -6 -13   19.48    7.31
   2   6  13   30.51   11.70
   2   6  14    6.84    4.48
  -2  -6 -14    8.69    6.95
   2   6  15   -0.79    4.16
  -2  -6 -15    1.89    6.76
   2   6  16    0.88    4.77
  -2  -6 -16    2.91    6.39
   2   6  17   38.57    8.60
   2   6  18    3.06    5.68
   2   6  19   19.06    6.73
   2   6  20    0.34    6.76
   2   6  21  157.99   16.27
   2   6  22   -0.53    6.11
   2   7 -15  -11.05    9.34
   2   7 -14   16.01    8.51
   2   7 -13    4.39    7.47
   2   7 -12    7.08    7.76
   2   7 -11  -13.52    7.18
   2   7 -10    5.81    5.22
   2   7  -9   19.08    6.99
   2   7  -8    8.37    6.07
   2   7  -7   -6.33    5.49
   2   7  -6   79.22   10.75
   2   7  -5    2.96    6.76
   2   7  -4   44.36    8.31
   2   7  -3   12.39    5.80
   2   7  -2   -0.23    4.82
   2   7  -1   15.49    6.66
   2   7   0    1.83    5.25
  -2  -7  -1   -1.29    7.20
   2   7   1    2.34    5.50
  -2  -7  -2   14.63    8.39
   2   7   2    3.08    5.88
   2   7   3   65.69   10.01
  -2  -7  -3   47.22   10.53
   2   7   4   20.42    8.11
   2   7   5  147.46   15.27
   2   7   6   17.94    8.38
   2   7   7   -9.22    8.09
   2   7   8   26.99   10.45
   2   7   9    2.67    8.31
   2   7  10   40.91   10.65
  -2  -7 -10   35.65    7.25
   2   7  11   -0.04    8.64
  -2  -7 -11   -2.80    5.06
   2   7  12   39.32   12.56
  -2  -7 -12   37.86    8.35
   2   7  13   23.92   11.06
  -2  -7 -13    5.64    5.94
   2   7  14   33.12   12.43
  -2  -7 -14   42.36    9.62
   2   7  15    8.35   11.84
  -2  -7 -15   13.99    7.64
   2   7  16   20.60   12.18
  -2  -7 -16   12.96    7.00
   2   7  17    9.21   12.48
  -2  -7 -17    0.30    6.66
  -2  -7 -18   -2.71    6.46
   2   7  18    6.59    6.17
  -2  -7 -19   24.67    7.73
   2   7  19   35.57    8.21
  -2  -7 -20   12.24    9.77
   2   7  20    8.61    5.80
  -2  -7 -21    4.00    8.00
   2   7  21    5.05    6.68
   2   8 -13   12.04    9.25
   2   8 -12    2.88    6.77
   2   8 -11   -4.81    6.49
   2   8 -10    5.04    5.71
   2   8  -9   12.91    7.22
   2   8  -8   20.61    7.76
   2   8  -7   -2.20    5.81
   2   8  -6    9.03    5.87
   2   8  -5    7.66    7.24
   2   8  -4   26.63    8.56
   2   8  -3   -3.43    6.21
   2   8  -2   10.56    6.87
   2   8  -1   99.18   13.12
   2   8   0   16.42    7.72
   2   8   1    7.33    6.88
   2   8   2   17.14    7.19
   2   8   3   38.36    9.10
   2   8   4   59.16   11.07
   2   8   5   10.53    7.69
   2   8   6   14.51    8.77
   2   8   7  169.77   18.42
   2   8   8   16.58    8.44
   2   8   9   91.26   16.25
   2   8  10   -1.29    8.49
   2   8  11    2.39    8.51
   2   8  12    7.17    9.60
  -2  -8 -13   17.22    8.25
   2   8  13   37.18   13.87
  -2  -8 -14   10.73    6.78
   2   8  14   -9.87   12.96
  -2  -8 -15   12.52    7.22
   2   8  15   26.30   13.84
  -2  -8 -16    4.28    7.06
   2   8  16   16.70   14.80
  -2  -8 -17   -2.56    7.16
   2   8  17   17.20   12.38
  -2  -8 -18    4.68    8.03
   2   8  18   -4.58   13.04
  -2  -8 -19    1.83    7.82
   2   8  19   30.06   14.83
   2   8  20   25.36   16.50
   2   9 -10   12.46    7.56
   2   9  -9   -9.01    7.92
   2   9  -8    5.99    6.75
   2   9  -7   11.49    7.23
   2   9  -6    4.78    8.74
   2   9  -5   19.37    8.60
   2   9  -4    5.99    6.53
   2   9  -3   31.50    9.59
   2   9  -2    4.15    6.50
   2   9  -1   -9.03    7.36
   2   9   0   17.49    8.36
   2   9   1    8.81    7.27
   2   9   2   11.13    8.02
   2   9   3   -1.93    6.40
   2   9   4   11.28    7.77
   2   9   5   65.33   12.60
   2   9   6    9.44    7.27
   2   9   7    1.45    7.60
   2   9   8    4.52    8.74
   2   9   9   21.29    9.88
   2   9  10   -1.78    8.83
   2   9  11   92.98   17.56
   2   9  12   17.46   10.78
   2   9  13    0.76   10.09
   2   9  14    0.75   10.96
   2   9  15   -2.52   12.73
   2   9  16  -17.39   12.58
   2   9  17   18.65   12.43
   2   9  18   39.25   17.49
   2  10  -7  -13.53    8.38
   2  10  -6    8.45    7.65
   2  10  -5   -9.90    7.18
   2  10  -4   12.05    8.19
   2  10  -3    3.88    7.78
   2  10  -2    2.25    7.81
   2  10  -1    1.15    8.24
   2  10   0   43.65   11.37
   2  10   1   23.74   10.76
   2  10   2    4.64    7.26
   2  10   3   41.62   11.50
   2  10   4    3.81    7.59
   2  10   5    6.54   10.44
   2  10   6   15.66    9.77
   2  10   7    4.29    7.66
   2  10   8   -5.28    8.98
   2  10   9   16.81   10.06
   2  10  10   12.52   10.21
   2  10  11   81.99   15.28
   2  10  12  -23.80   14.12
   2  10  13   65.14   15.75
   2  10  14    8.19   12.62
   2  10  15  -12.22   14.21
   2  10  16   -0.99   13.16
   2  11  -3   -3.72    7.79
   2  11  -2    6.48    8.41
   2  11  -1    9.57    8.65
   2  11   0    2.32    8.12
   2  11   1   21.17   10.11
   2  11   2    3.95    8.18
   2  11   3  -10.57    8.63
   2  11   4    3.32    9.08
   2  11   5   10.48   10.01
   2  11   6   16.19   10.54
   2  11   7   40.80   12.60
   2  11   8   -2.40    9.55
   2  11   9   17.29   11.43
   2  11  10   20.53   12.22
   2  11  11  189.28   23.75
   2  11  12   34.56   13.93
  -3  11   9    4.65    9.79
  -3  11   8   12.31   12.05
  -3  11   7   20.51   11.15
  -3  11   6   33.38   11.34
  -3  11   5   46.49   12.79
  -3  11   4   16.49   10.99
  -3  11   3   32.30    9.55
  -3  11   2    4.71    8.12
  -3  11   1   -7.15    8.77
  -3  11   0    4.73    8.53
  -3  11  -1   11.19    7.01
  -3  10  13   19.92   11.16
  -3  10  12  -15.15   13.16
  -3  10  11    1.91   10.01
  -3  10  10    3.85    9.33
  -3  10   9  -11.48   11.68
  -3  10   8   -0.37    8.63
  -3  10   7   25.28   10.69
  -3  10   6   -7.00    9.55
  -3  10   5   44.13   11.93
  -3  10   4   48.37   12.12
  -3  10   3    8.88    8.23
  -3  10   2   -8.05    6.83
  -3  10   1   77.92   13.07
  -3  10   0   -6.08    8.00
  -3  10  -1    7.98    7.13
  -3  10  -2   10.07    7.29
  -3  10  -3    5.63    6.59
  -3  10  -4    0.39    6.66
  -3  10  -5   15.30    8.56
  -3  10  -6   23.09    8.72
  -3   9  16   15.88   12.73
  -3   9  15   -4.95   11.20
  -3   9  14   42.19   14.46
  -3   9  13    5.22   10.06
  -3   9  12   22.83   11.65
  -3   9  11   -1.53    8.98
  -3   9  10   -8.39    8.58
  -3   9   9   63.60   14.38
  -3   9   8   24.33   10.99
  -3   9   7   16.40    9.78
  -3   9   6   10.96    7.75
  -3   9   5   11.83    8.06
  -3   9   4   -7.67    7.37
  -3   9   3   31.21    9.50
  -3   9   2    8.39    6.46
  -3   9   1   46.54   10.08
  -3   9   0   -1.36    6.96
  -3   9  -1   -6.74    6.31
  -3   9  -2   -1.99    5.37
  -3   9  -3   11.53    7.32
  -3   9  -4    6.78    5.98
  -3   9  -5    5.62    5.69
  -3   9  -6   -1.56    6.16
  -3   9  -7   -2.86    5.36
  -3   9  -8    9.06    5.77
  -3   9  -9  -13.99    8.08
  -3   9 -10   12.00    7.26
  -3   8  18  -10.53   12.02
  -3   8  18   -4.26    5.83
  -3   8  17  102.94   20.19
  -3   8  17   62.67    9.12
  -3   8  16   28.67    7.01
  -3   8  16   28.78   13.65
  -3   8  15    1.61    4.14
  -3   8  15   -4.42   10.94
  -3   8  14   20.48    6.14
  -3   8  14   13.43   11.02
  -3   8  13   25.28    6.03
  -3   8  13   13.37   10.01
  -3   8  12    7.26    8.73
  -3   8  12   -2.47    3.96
  -3   8  12    0.16    3.12
  -3   8  11    2.73    9.61
  -3   8  11   18.96    4.84
  -3   8  11   10.97    4.30
  -3   8  10   10.60    4.00
  -3   8  10    2.36    9.32
  -3   8   9   13.79    8.52
  -3   8   9   11.36    4.40
  -3   8   8   -2.30    7.49
  -3   8   7   -4.49    7.94
  -3   8   6   21.62    8.25
  -3   8   5  -14.30    7.31
  -3   8   4   17.59    8.14
  -3   8   3   25.74    8.17
  -3   8   2   13.84    6.00
  -3   8   1   -4.42    7.00
  -3   8   0    1.55    5.49
  -3   8  -1    9.34    6.49
  -3   8  -2   -7.64    5.73
  -3   8  -3   11.81    7.01
  -3   8  -4   43.29    8.13
  -3   8  -5   38.61    8.91
  -3   8  -6    2.02    5.75
  -3   8  -7    0.12    4.94
  -3   8  -8    4.18    6.18
  -3   8  -9   -6.08    6.42
  -3   8 -10    4.63    6.24
  -3   8 -11   22.06    8.24
  -3   8 -12   12.88    7.23
  -3   7  19    2.77    5.50
  -3   7  18    8.82    5.55
  -3   7  17   21.78    6.50
  -3   7  16   20.78    6.60
  -3   7  15   38.15   14.83
  -3   7  15   34.48    6.53
  -3   7  14   13.01   10.67
  -3   7  14    1.53    4.52
  -3   7  13   29.20   12.64
  -3   7  13    2.93    4.06
  -3   7  12  101.35    9.79
  -3   7  12  114.60   17.47
  -3   7  12   98.45    7.83
  -3   7  11  217.98   13.83
  -3   7  11  221.19   22.01
  -3   7  11  187.94   10.62
  -3   7  10   67.22    7.76
  -3   7  10   70.26   14.20
  -3   7  10   60.85    6.79
  -3   7   9   85.81   13.84
  -3   7   8   20.15    8.16
  -3   7   7    5.00    6.38
  -3   7   6   40.49    9.34
  -3   7   5   58.15   10.21
  -3   7   4  571.32   26.34
   3  -7  -3  124.82    4.97
  -3   7   3  128.14    5.91
  -3   7   2   -1.71    5.74
   3  -7  -2    1.84    2.07
  -3   7   1  -12.98    5.89
  -3   7   0   -0.21    4.64
  -3   7  -1    3.73    5.13
  -3   7  -2   37.38    8.05
  -3   7  -3   -4.27    5.56
  -3   7  -4    6.71    5.07
  -3   7  -5   13.17    6.31
  -3   7  -6   49.53    8.08
  -3   7  -7    5.20    5.59
  -3   7  -8    0.93    4.55
  -3   7  -9    8.33    5.53
  -3   7 -10    2.67    5.54
  -3   7 -11    2.94    5.54
  -3   7 -12   -6.65    6.64
   3  -7  13   -0.45    7.58
  -3   7 -13   -3.39    5.58
   3  -7  14    8.51    7.09
  -3   7 -14   18.91    8.64
  -3   6  20   17.76    8.28
  -3   6  19   -5.23    7.23
  -3   6  18    6.17    4.97
  -3   6  17   -3.69    4.82
  -3   6  16    6.24    4.90
  -3   6  15   32.03    7.31
  -3   6  14   60.51    8.57
  -3   6  13  392.61   18.24
  -3   6  12  129.59   11.34
  -3   6  11    3.90    2.75
  -3   6  11    8.71    4.97
  -3   6  10   67.51    7.61
  -3   6  10   69.13   11.99
  -3   6  10   60.19    6.08
  -3   6   9  209.11   19.97
  -3   6   9  175.02   10.06
  -3   6   8  102.71   13.82
  -3   6   7   99.03   12.87
  -3   6   6  129.17   13.47
  -3   6   5   76.95   10.95
  -3   6   4   12.32    6.05
   3  -6  -3   66.45    2.54
  -3   6   3   71.80    3.40
   3  -6  -2  405.13    9.90
  -3   6   2  482.47   21.96
   3  -6  -1   45.02    4.42
  -3   6   1   50.10    7.53
  -3   6   0   64.13    8.68
  -3   6  -1   70.35    8.79
  -3   6  -2   13.24    4.89
  -3   6  -3   -3.52    3.99
  -3   6  -4    6.54    4.91
  -3   6  -5    6.62    4.84
  -3   6  -6   15.87    5.59
  -3   6  -7   22.76    5.65
  -3   6  -8   44.15    7.58
  -3   6  -9    0.78    4.21
  -3   6 -10   11.13    6.14
  -3   6 -11   -0.67    4.49
  -3   6 -12    6.04    5.01
   3  -6  12   -3.30    5.82
  -3   6 -13    6.33    5.57
   3  -6  13   11.86    6.91
  -3   6 -14    5.34    5.56
   3  -6  14   13.90    7.39
  -3   6 -15   12.03    7.32
   3  -6  15    5.96    6.63
  -3   6 -16    5.45    9.03
   3  -6  16   -9.17    7.45
  -3   5  21   -5.15    7.25
  -3   5  20   -0.20    5.98
  -3   5  19   12.35    6.43
  -3   5  18   17.92    6.85
  -3   5  17   22.22    6.40
  -3   5  16   17.85    5.44
  -3   5  15   28.61    6.94
  -3   5  14  156.68    8.47
  -3   5  14  174.29    8.43
  -3   5  14  184.36   13.25
  -3   5  13    6.35    2.50
  -3   5  13    9.14    4.13
  -3   5  13   11.82    2.93
  -3   5  12  123.32    5.84
  -3   5  12  126.92    7.36
  -3   5  12  132.76   11.13
  -3   5  11   62.21    5.52
  -3   5  11   66.33    3.46
  -3   5  11   65.77    7.97
  -3   5   8   43.69    9.73
  -3   5   8   37.52    4.53
  -3   5   7   -0.96    5.01
  -3   5   7   -1.31    2.22
  -3   5   6   49.94    8.38
  -3   5   5   38.97    7.34
  -3   5   4   23.86    5.69
  -3   5   3   13.17    5.00
   3  -5  -2  304.15    6.88
  -3   5   2  318.62   15.88
   3  -5  -1   81.33    4.91
  -3   5   1   91.73    9.21
   3  -5   0   58.73    4.87
  -3   5   0   67.06    7.14
   3  -5   1   26.00    4.15
  -3   5  -1   35.88    5.96
   3  -5   2   34.95    4.80
  -3   5  -2   52.42    7.08
  -3   5  -3   26.79    5.43
  -3   5  -4  197.50   11.97
  -3   5  -5   20.10    5.50
  -3   5  -6   30.99    5.69
  -3   5  -7   -5.66    3.74
  -3   5  -8   13.37    4.67
  -3   5  -9    0.86    3.90
  -3   5 -10   -3.13    3.87
   3  -5  11    3.11    6.09
  -3   5 -11   -6.59    5.41
   3  -5  12   -1.44    6.02
  -3   5 -12    3.83    5.14
   3  -5  13   10.45    7.36
  -3   5 -13   -2.73    5.72
   3  -5  14   30.25    9.38
  -3   5 -14   13.82    6.68
   3  -5  15    1.18    6.32
  -3   5 -15   -0.55    6.51
   3  -5  16  -10.38    8.66
  -3   5 -16   17.37    8.19
  -3   5 -17   -0.62    7.38
   3  -5  17    3.26    7.01
  -3   5 -18   10.43    8.28
   3  -5  18   12.79    7.89
  -3   4  22   13.10    7.95
  -3   4  21   -0.37    6.55
  -3   4  20   17.14    6.60
  -3   4  19   33.51    8.18
  -3   4  18   51.00    8.37
  -3   4  18   48.64    7.46
  -3   4  17   11.26    4.80
  -3   4  17   22.04    6.20
  -3   4  16   11.15    4.15
  -3   4  16   13.67    5.21
  -3   4  15    9.44    3.91
  -3   4  15   -3.83    4.41
  -3   4  14    1.10    2.39
  -3   4  14   -0.15    4.46
  -3   4  13   56.15    5.87
  -3   4  13   73.12    8.49
  -3   4  13   69.03    5.54
  -3   4  12  122.43    7.35
  -3   4  12  137.56    7.66
  -3   4  12  140.63   11.05
  -3   4  11   22.24    3.63
  -3   4  11   23.18    6.13
  -3   4  11   18.69    2.93
  -3   4  10   35.96    3.48
  -3   4  10   37.17    4.46
  -3   4   9    1.23    1.86
  -3   4   9    0.00    1.25
  -3   4   8  134.91    7.53
  -3   4   7   65.02    5.44
  -3   4   6   40.15    7.72
  -3   4   4   27.80    5.98
  -3   4   3   19.64    4.74
  -3   4   2   36.41    5.89
   3  -4  -2   35.96    2.12
   3  -4  -1   -0.79    1.59
   3  -4  -1    1.78    4.18
  -3   4   1    6.07    3.18
  -3   4   0   23.52    4.53
   3  -4   0   26.94    5.89
   3  -4   0   23.79    2.99
   3  -4   1    7.68    2.70
  -3   4  -1    2.71    3.18
   3  -4   1    3.77    3.89
   3  -4   2   55.51    5.14
   3  -4   2   66.51    7.99
  -3   4  -2   66.13    6.83
   3  -4   3   84.44    6.82
  -3   4  -3   94.67    7.56
   3  -4   4  198.55   10.77
  -3   4  -5   21.07    4.79
   3  -4   5    9.30    3.81
  -3   4  -6   11.37    4.54
   3  -4   6   15.21    4.54
  -3   4  -7    0.40    3.62
   3  -4   7    0.21    4.61
  -3   4  -8   35.30    5.86
   3  -4   8   33.22    6.15
  -3   4  -9    5.83    3.85
   3  -4   9    3.19    5.11
  -3   4 -10   -2.43    4.43
   3  -4  10   -0.22    4.19
  -3   4 -11   -2.39    4.17
   3  -4  11    4.66    5.08
  -3   4 -12   60.84    9.20
   3  -4  12   53.32    9.36
  -3   4 -13    6.63    4.70
   3  -4  13   -4.04    4.87
  -3   4 -14   23.77    7.10
   3  -4  14   31.91    9.00
   3  -4  15    2.50    6.84
  -3   4 -15    4.12    6.32
   3  -4  16   19.31    9.30
  -3   4 -16   -4.47    7.21
   3  -4  17    8.04    8.13
  -3   4 -17   -4.97    8.20
   3  -4  18    1.27    6.46
  -3   4 -18    5.29    9.07
   3  -4  19    5.90    7.76
  -3   4 -19   -0.22    8.18
  -3   3  22   -4.04    6.47
  -3   3  21   11.87    6.63
  -3   3  21    7.85    5.82
  -3   3  20   19.14    7.07
  -3   3  20   34.47    8.12
  -3   3  19    2.77    4.74
  -3   3  19   11.40    6.18
  -3   3  18   14.63    5.42
  -3   3  18   28.62    7.54
  -3   3  17   -1.19    4.89
  -3   3  17   -3.94    4.56
  -3   3  16    6.76    4.50
  -3   3  16    2.89    4.06
  -3   3  15   22.38    4.14
  -3   3  15   29.70    6.83
  -3   3  15   22.91    4.95
  -3   3  14    4.34    3.38
  -3   3  14    4.65    3.92
  -3   3  14   12.33    5.05
  -3   3  13    0.84    2.35
  -3   3  13    9.21    4.07
  -3   3  12  250.64   14.34
  -3   3  12  218.62    9.75
  -3   3  11    2.60    2.30
  -3   3  11   -0.43    3.85
  -3   3  10   73.63    5.58
  -3   3   9    3.71    1.83
  -3   3   8    6.06    2.09
  -3   3   7  177.99    8.09
   3  -3  -6 1289.89   14.26
  -3   3   6 1339.22   22.09
  -3   3   5   44.27    4.42
  -3   3   4   50.29    7.22
  -3   3   4   38.77    4.13
  -3   3   3   12.51    3.14
  -3   3   3   21.90    4.83
  -3   3   2  103.70    4.30
  -3   3   2  111.08    8.35
  -3   3   1   97.52    7.49
   3  -3  -1   94.99    4.23
  -3   3   0 1532.11   24.55
   3  -3   0 1487.63   19.07
   3  -3   1  132.79    8.84
  -3   3  -1  122.66    7.10
   3  -3   1  111.83    6.20
  -3   3  -2  684.30   15.64
   3  -3   2  679.00   15.76
   3  -3   3   -0.97    2.45
  -3   3  -3    1.35    2.52
   3  -3   3   -0.35    2.92
   3  -3   4   11.42    3.35
  -3   3  -4    8.95    2.50
   3  -3   4   10.46    3.67
   3  -3   5    1.92    2.85
  -3   3  -5    3.28    3.00
   3  -3   5   -2.40    3.41
   3  -3   6  289.12   13.54
  -3   3  -6  292.22   11.85
   3  -3   7    6.30    4.10
   3  -3   8   30.26    5.57
  -3   3  -8   31.85    5.28
   3  -3   9    4.81    4.38
  -3   3  -9    5.96    4.26
  -3   3 -10  135.80   10.77
   3  -3  10  122.60   11.35
   3  -3  11   -3.66    4.43
  -3   3 -11   -4.96    4.42
  -3   3 -12   80.73    9.56
   3  -3  12   76.65   10.17
   3  -3  13   -1.76    5.47
  -3   3 -13    6.56    5.97
   3  -3  14   44.97    8.97
  -3   3 -14   58.57    9.84
   3  -3  15   47.13    8.93
  -3   3 -15   57.36   10.29
  -3   3 -16    7.42    6.95
   3  -3  16   -8.49    7.79
  -3   3 -17   10.73    7.42
   3  -3  17   11.86    6.69
  -3   3 -18   25.62   10.14
   3  -3  18   24.44    9.37
  -3   3 -19   -7.84    9.93
   3  -3  19   -6.01    9.56
   3  -3  20    8.91    7.83
  -3   2  22   57.10   10.76
  -3   2  22   88.69   12.16
  -3   2  21   46.66    9.18
  -3   2  21   29.12    8.50
  -3   2  20   60.47    9.83
  -3   2  20   61.55    9.74
  -3   2  19   19.01    6.44
  -3   2  19   12.24    5.78
  -3   2  18    4.40    4.93
  -3   2  17    9.92    5.28
  -3   2  16   -4.97    4.88
  -3   2  16    3.66    4.31
  -3   2  15    2.17    5.06
  -3   2  15    1.23    3.17
  -3   2  14  485.03   20.47
  -3   2  14  487.43   15.68
   3  -2 -13  227.05    8.78
  -3   2  13  254.23   14.42
  -3   2  12    0.88    2.76
   3  -2 -12    0.41    1.89
  -3   2  12   -2.05    3.64
   3  -2 -11   24.43    3.36
  -3   2  11   19.57    3.62
  -3   2  11   20.57    5.41
  -3   2  10   19.15    4.61
   3  -2 -10   10.37    2.15
  -3   2  10   22.80    4.09
   3  -2  -9    0.98    1.89
  -3   2   9    2.25    2.50
  -3   2   8   68.17    5.55
   3  -2  -8   61.46    5.00
  -3   2   7    4.83    2.18
   3  -2  -7    1.58    2.05
  -3   2   7    7.11    3.57
  -3   2   6   29.60    3.73
  -3   2   6   26.16    5.15
  -3   2   5   43.22    4.30
   3  -2  -4 1557.60   20.09
  -3   2   4 1478.81   22.59
  -3   2   3   43.40    4.24
  -3   2   3   47.16    3.06
  -3   2   2   53.07    4.57
  -3   2   2   64.98    5.76
  -3   2   2   64.12    3.64
  -3   2   1   -1.77    2.28
  -3   2   1    0.62    1.47
  -3   2   1   -1.49    2.14
  -3   2   1    1.36    2.40
  -3   2   0   37.54    4.34
  -3   2   0   47.02    3.75
  -3   2   0   42.56    3.75
   3  -2   0   47.09    3.66
   3  -2   1    4.03    2.48
   3  -2   1    3.52    2.73
  -3   2  -1    1.99    2.39
  -3   2  -1    2.28    1.65
   3  -2   2   64.72    4.92
  -3   2  -2   57.49    3.84
   3  -2   2   53.79    4.75
   3  -2   3    0.16    2.39
   3  -2   3    0.02    2.55
  -3   2  -3   -2.01    1.82
   3  -2   4  771.83   16.53
   3  -2   4  742.73   18.26
  -3   2  -4  785.86   14.88
   3  -2   5   35.78    4.60
  -3   2  -5   32.20    4.01
   3  -2   5   30.84    4.69
   3  -2   6   17.57    4.11
   3  -2   6   22.81    4.01
  -3   2  -6   17.49    3.59
   3  -2   7  120.93    8.20
   3  -2   7  115.49    9.05
  -3   2  -7  126.19    8.30
   3  -2   8    7.87    3.69
   3  -2   9    4.90    4.31
  -3   2  -9    9.79    3.95
  -3   2 -10   92.15    9.01
   3  -2  10   90.18    9.10
   3  -2  11   -0.58    4.18
  -3   2 -11    0.30    4.29
   3  -2  12    8.20    5.23
  -3   2 -12    7.27    4.55
  -3   2 -13   47.05    8.68
   3  -2  13   49.90    8.91
   3  -2  14    5.59    6.06
  -3   2 -14    2.65    5.33
  -3   2 -15   63.54   10.12
   3  -2  15   61.65   10.06
   3  -2  16   44.58    9.77
  -3   2 -16   64.09   11.41
   3  -2  17    2.62    7.52
  -3   2 -17   13.29    8.24
   3  -2  18   18.09    7.66
   3  -2  21    1.92    7.24
  -3   1  22    9.32    7.44
  -3   1  22    8.80    6.94
  -3   1  21   11.21    7.87
  -3   1  20    5.88    6.51
  -3   1  19   26.42    6.97
  -3   1  18   44.42    8.47
  -3   1  17   24.77    6.83
  -3   1  16   27.78    6.84
  -3   1  15    2.96    4.09
  -3   1  15   16.95    4.69
  -3   1  14   13.15    4.29
  -3   1  14    8.70    4.77
  -3   1  13   78.33    8.67
  -3   1  13   78.17    7.24
   3  -1 -13   66.72    5.56
   3  -1 -12  452.86   13.30
  -3   1  12  526.76   17.18
  -3   1  11   17.74    4.27
   3  -1 -11   14.99    2.88
   3  -1 -10  343.30   11.53
  -3   1  10  385.32   13.60
  -3   1   9   17.69    3.52
   3  -1  -9   19.52    3.16
  -3   1   8   32.93    4.28
   3  -1  -8   32.48    3.90
   3  -1  -7    2.89    1.92
  -3   1   7    1.02    3.58
  -3   1   6  118.45    7.32
   3  -1  -6  105.87    6.31
  -3   1   6  113.29    7.77
   3  -1  -5    3.96    2.52
  -3   1   5   -0.92    2.24
  -3   1   5    1.04    2.43
  -3   1   4   57.07    5.06
  -3   1   4   58.82    4.93
   3  -1  -4   64.72    5.08
   3  -1  -3   15.15    3.60
  -3   1   3   11.50    2.51
   3  -1  -3   17.24    2.86
  -3   1   3   14.99    2.74
  -3   1   2  479.89   12.65
   3  -1  -2  511.46   13.23
   3  -1  -2  452.08   12.63
  -3   1   2  538.40   11.39
  -3   1   2  519.48   10.71
  -3   1   1   29.26    3.82
   3  -1  -1   26.85    3.76
  -3   1   1   18.53    3.74
  -3   1   1   30.69    3.27
  -3   1   0   52.36    4.64
  -3   1   0   54.21    4.98
   3  -1   0   59.64    4.11
  -3   1   0   58.38    4.31
  -3   1  -1    2.88    2.32
  -3   1  -1    1.91    1.91
   3  -1   1    3.18    2.34
   3  -1   2    2.12    1.41
  -3   1  -2    3.25    2.35
  -3   1  -2   -0.08    1.25
   3  -1   2    3.43    2.41
  -3   1  -2   -0.48    2.08
   3  -1   3    7.05    1.95
   3  -1   3    8.06    3.01
  -3   1  -3    7.20    2.86
  -3   1  -3    8.24    2.70
  -3   1  -3    9.05    1.88
  -3   1  -4   55.04    4.89
   3  -1   4   61.18    4.04
   3  -1   4   60.79    5.52
  -3   1  -4   56.08    5.88
  -3   1  -4   63.97    4.40
   3  -1   5   21.18    4.39
  -3   1  -5   17.52    4.02
   3  -1   5   20.20    2.99
  -3   1  -5   24.22    3.69
   3  -1   6   16.24    4.49
  -3   1  -6   25.05    4.10
   3  -1   6   26.39    3.75
   3  -1   7   11.73    3.79
  -3   1  -7    8.38    3.44
   3  -1   7   20.52    3.68
   3  -1   8 1156.39   27.53
  -3   1  -8 1236.24   27.20
   3  -1   8 1177.81   23.47
   3  -1   9   11.68    4.31
   3  -1  10  261.03   14.75
  -3   1 -10  251.52   14.31
  -3   1 -11   -3.45    4.96
   3  -1  11   -1.59    4.07
  -3   1 -12    8.51    5.62
   3  -1  12    9.51    4.77
  -3   1 -13    3.70    5.22
   3  -1  13    2.10    4.42
   3  -1  14   -3.78    5.96
   3  -1  17   34.56    8.94
  -3   1 -18   10.94    4.17
   3  -1  18    3.54    5.97
   3  -1  19   17.36    6.78
   3  -1  20   -4.83    7.36
   3  -1  21   -0.67    7.62
   3  -1  22   12.64    7.31
  -3   0  21   14.80    6.76
  -3   0  20   58.77    9.98
  -3   0  19   10.41    6.54
  -3   0  18    0.02    4.99
  -3   0  17   14.93    6.25
  -3   0  17    0.40    5.17
  -3   0  16   -1.22    4.84
  -3   0  16    9.10    5.72
  -3   0  15   -0.98    3.92
  -3   0  15    7.16    5.30
  -3   0  14   -0.20    5.32
  -3   0  14   13.57    5.57
  -3   0  13   14.53    4.72
  -3   0  13   19.78    4.89
  -3   0  12   40.68    6.53
   3   0 -12   43.59    7.31
  -3   0  11  148.43   10.93
   3   0 -11  143.16   13.24
  -3   0  10  188.12   11.68
  -3   0  10  180.23   10.64
   3   0 -10  166.38   12.76
  -3   0   9   30.19    4.86
  -3   0   9   33.78    5.00
   3   0  -9   35.42    6.59
   3   0  -8   12.10    3.23
   3   0  -8   11.01    4.13
  -3   0   8   11.54    3.96
   3   0  -7    7.59    2.78
  -3   0   7   -0.51    2.58
   3   0  -7   10.00    4.49
  -3   0   7   -0.24    2.74
  -3   0   6 1618.60   26.95
   3   0  -6 1684.89   25.97
  -3   0   6 1575.48   25.77
   3   0  -6 1618.78   29.65
   3   0  -5    0.72    2.44
  -3   0   5    4.53    2.68
   3   0  -5    3.82    3.00
  -3   0   5   -0.09    2.71
   3   0  -4   32.20    4.10
  -3   0   4   27.48    4.10
  -3   0   4   29.76    3.53
   3   0  -4   22.98    3.94
  -3   0   3   11.54    3.25
   3   0  -3   11.53    3.12
  -3   0   3    7.97    2.24
   3   0  -3   10.61    2.77
   3   0  -2   69.00    6.36
   3   0  -2   67.15    5.50
  -3   0   2   70.30    5.56
  -3   0   2   64.79    3.61
   3   0  -2   66.85    4.16
   3   0  -1   38.67    5.15
  -3   0   1   36.50    2.38
   3   0  -1   46.67    4.43
  -3   0   1   38.67    4.36
   3   0  -1   41.44    2.76
   3   0   0  788.45   16.19
   3   0   0  889.66   20.71
  -3   0   0  877.19   19.65
  -3   0   0  805.85   16.92
  -3   0   0  786.12   15.68
   3   0   1   60.27    4.85
  -3   0  -1   41.43    6.10
  -3   0  -1   54.95    5.06
  -3   0  -1   56.37    5.01
   3   0   2  206.02    8.41
  -3   0  -2  177.53    7.79
   3   0   2  184.47    8.04
  -3   0  -2  191.92    8.52
   3   0   3   18.37    3.32
  -3   0  -3   11.26    3.00
   3   0   3   12.16    3.39
  -3   0  -3    7.61    2.37
   3   0   3   13.97    1.89
  -3   0  -4  920.70   17.00
  -3   0  -4  920.68   20.37
   3   0   4  953.51   20.21
   3   0   4  882.02   13.43
   3   0   5   -1.97    3.30
  -3   0  -5    0.97    2.85
  -3   0  -5   -0.37    2.28
   3   0   5    1.01    2.09
   3   0   6  549.81   13.93
  -3   0  -6  584.14   13.85
   3   0   6  590.89   18.10
   3   0   7   26.09    3.79
   3   0   7   23.12    4.72
  -3   0  -7   25.35    3.64
  -3   0  -8  513.81   13.31
   3   0   8  519.88   18.39
   3   0   8  501.67   16.04
  -3   0  -9   11.62    2.75
   3   0   9    8.68    3.69
  -3   0 -10    2.96    2.25
   3   0  10    8.54    4.23
  -3   0 -11   11.13    3.03
  -3   0 -12    9.76    3.15
   3   0  12    8.22    3.98
  -3   0 -13    3.67    2.77
   3   0  13    7.60    4.71
  -3   0 -14    7.96    3.02
   3   0  14    0.39    5.35
  -3   0 -15    6.66    2.92
   3   0  15    2.21    6.02
   3   0  16   67.57   10.17
  -3   0 -16   66.06    5.62
  -3   0 -17    8.41    3.03
   3   0  17    0.15    5.35
   3   0  18    7.43    6.72
   3   0  19   17.98    7.90
   3   0  20   13.12    7.64
   3   0  21    3.05    6.97
   3   0  22   -8.53    7.71
  -3  -1  21   -2.71    5.83
  -3  -1  20   -7.64    8.21
  -3  -1  19    3.11    6.48
  -3  -1  18    9.73    6.78
   3   1 -17  -12.42    7.83
  -3  -1  17    8.10    5.89
  -3  -1  16    5.60    6.44
   3   1 -16    2.13    7.31
  -3  -1  16   -2.89    4.33
  -3  -1  15    3.93    5.17
  -3  -1  15    2.43    5.15
   3   1 -15   10.01    7.69
  -3  -1  14   89.65    9.01
  -3  -1  14   81.91    9.58
  -3  -1  13    2.06    4.07
   3   1 -13   -1.08    6.27
  -3  -1  13    1.71    5.31
   3   1 -12   25.27    6.04
  -3  -1  12   34.73    6.55
  -3  -1  12   24.41    5.29
   3   1 -11   23.41    5.78
  -3  -1  11   18.38    4.37
  -3  -1  11   30.38    6.20
  -3  -1  10   98.98    8.60
  -3  -1  10   95.31    8.83
  -3  -1   9   48.28    6.51
  -3  -1   9   36.33    5.59
   3   1  -9   51.51    7.07
  -3  -1   8   69.19    6.78
   3   1  -8   65.38    7.38
   3   1  -7    3.38    3.41
  -3  -1   6  501.11   16.75
   3   1  -6  480.14   15.74
  -3  -1   6  475.96   15.03
  -3  -1   5    0.81    2.76
   3   1  -5   13.94    3.66
   3   1  -5    6.03    2.75
  -3  -1   5   11.68    4.31
   3   1  -4   78.80    6.65
  -3  -1   4   66.79    6.68
   3   1  -4   70.04    5.42
  -3  -1   4   63.27    5.54
   3   1  -3   13.35    2.88
  -3  -1   3   11.50    2.81
  -3  -1   3    5.77    3.15
   3   1  -3   11.33    3.22
   3   1  -2    5.60    2.10
  -3  -1   2   -1.11    3.01
   3   1  -2   -1.58    2.69
  -3  -1   2   -0.98    2.11
  -3  -1   1    2.52    2.15
   3   1  -1   -0.67    4.20
   3   1  -1    0.61    1.66
   3   1  -1   -2.64    2.11
  -3  -1   1    1.31    2.72
   3   1   0  224.49   12.17
   3   1   0  204.98    9.28
  -3  -1   0  215.84    9.52
   3   1   0  221.16    6.35
  -3  -1   0  199.17    7.25
   3   1   1   11.34    2.17
  -3  -1  -1    5.75    4.60
   3   1   1    6.34    4.27
  -3  -1  -1    5.06    2.33
  -3  -1  -1    8.11    3.01
   3   1   1    6.05    2.80
  -3  -1  -1    5.21    2.46
   3   1   2 3308.25   28.21
   3   1   2 3334.55   33.62
  -3  -1  -2 3342.14   33.50
  -3  -1  -2 3385.26   43.05
  -3  -1  -3  309.12   12.36
   3   1   3  353.59   12.21
   3   1   3  331.74   10.45
   3   1   3  334.71   10.57
  -3  -1  -3  341.12   10.83
  -3  -1  -3  340.53   14.75
  -3  -1  -4 1132.68   18.94
   3   1   4 1158.29   19.79
   3   1   4 1097.48   22.81
  -3  -1  -4 1166.00   23.38
  -3  -1  -5   76.98    5.48
   3   1   5   77.73    5.35
  -3  -1  -5   91.72    7.06
   3   1   5   72.19    6.73
   3   1   6  413.77   11.93
  -3  -1  -6  411.95   11.62
   3   1   6  401.90   14.54
  -3  -1  -7    5.49    2.27
   3   1   7    4.54    3.53
  -3  -1  -8   73.19    4.99
   3   1   8   79.99    7.64
   3   1   8   74.74    7.71
  -3  -1  -9    2.98    2.14
   3   1   9    4.02    3.53
   3   1  10  171.13   11.56
  -3  -1 -10  176.63    7.53
   3   1  11  108.43   10.34
  -3  -1 -11  103.20    5.73
   3   1  12   73.50    9.31
  -3  -1 -12   88.98    5.45
  -3  -1 -13    7.14    2.22
   3   1  13    3.17    4.17
   3   1  14   62.34    8.88
  -3  -1 -14   59.74    4.65
  -3  -1 -15    3.64    2.32
   3   1  15    9.97    5.41
   3   1  16  103.69   12.84
  -3  -1 -16  100.03    5.97
   3   1  17    5.24    6.52
   3   1  18    9.80    7.10
   3   1  19   -3.59    5.47
   3   1  20    6.41    7.39
   3   1  21   12.62    7.20
   3   1  22   18.66    8.72
  -3  -2  20   -2.65    5.83
  -3  -2  19    5.74    6.07
   3   2 -19  -11.89    9.94
  -3  -2  18    4.80    5.26
   3   2 -18   -9.34    9.37
  -3  -2  17  -15.58    6.61
   3   2 -17   -1.10    6.75
  -3  -2  16   50.02   10.23
   3   2 -16   45.65    9.93
  -3  -2  16   50.29    8.34
  -3  -2  15    5.07    6.19
   3   2 -15   16.24    7.58
  -3  -2  15    6.30    4.79
  -3  -2  14    5.23    6.11
   3   2 -14    7.53    6.56
  -3  -2  14    7.81    5.21
  -3  -2  13    9.92    6.32
   3   2 -13    2.72    5.33
  -3  -2  13    7.81    4.65
  -3  -2  12   -7.24    4.79
   3   2 -12    2.83    5.09
  -3  -2  12   -1.17    3.74
  -3  -2  11   -6.39    4.76
   3   2 -11    3.54    5.16
  -3  -2  11    9.31    4.54
  -3  -2  10  179.65   10.95
   3   2 -10  163.82   12.22
  -3  -2  10  176.10   13.86
   3   2  -9   11.05    4.85
  -3  -2   9   10.31    3.77
  -3  -2   9   -2.91    4.37
  -3  -2   8  143.75    9.63
   3   2  -8  119.89    9.40
  -3  -2   8  139.33   10.94
  -3  -2   7    1.83    3.07
   3   2  -7   -2.21    3.17
  -3  -2   7   -0.39    3.61
  -3  -2   6   42.11    6.52
   3   2  -6   39.85    4.94
   3   2  -5    1.47    2.84
  -3  -2   5    4.16    3.77
  -3  -2   4  904.46   21.13
   3   2  -4  893.28   19.24
  -3  -2   3   21.59    4.42
  -3  -2   3   20.72    4.08
   3   2  -3   20.66    3.86
   3   2  -2   68.17    6.68
  -3  -2   2   71.94    6.71
   3   2  -2   76.55    5.80
  -3  -2   2   72.25    6.12
  -3  -2   1   62.04    6.11
   3   2  -1   67.20    6.76
   3   2  -1   58.94    7.40
  -3  -2   1   70.34    6.13
   3   2  -1   65.79    5.17
   3   2   0 1024.48   21.60
  -3  -2   0  966.59   21.06
   3   2   0 1014.95   26.86
  -3  -2   0  925.02   20.08
   3   2   0  978.14   18.06
  -3  -2  -1  171.45    8.91
   3   2   1  158.91    8.82
   3   2   1  168.43   11.45
   3   2   1  170.95    8.16
  -3  -2  -1  167.74    9.37
  -3  -2  -2 1177.57   22.53
  -3  -2  -2 1183.61   22.23
   3   2   2 1194.93   21.78
   3   2   2 1211.73   28.20
  -3  -2  -2 1149.84   26.84
   3   2   2 1132.38   21.20
  -3  -2  -2 1136.09   23.53
  -3  -2  -3   90.81    7.30
  -3  -2  -3  108.85    7.07
   3   2   3  107.34    6.92
  -3  -2  -3  117.95    9.33
   3   2   3  107.47    8.04
   3   2   4  115.23    7.87
  -3  -2  -4  102.05    7.97
   3   2   4  131.60    8.94
   3   2   4  117.04    6.86
  -3  -2  -4  120.56    7.25
  -3  -2  -4  109.28    9.13
   3   2   5  301.11   10.41
  -3  -2  -5  315.10   10.85
   3   2   5  295.87   12.35
  -3  -2  -5  279.45   14.64
   3   2   6    2.07    2.11
  -3  -2  -6    3.99    2.49
  -3  -2  -7   42.34    4.36
   3   2   7   34.86    3.95
   3   2   7   41.00    5.78
   3   2   8   -2.73    3.27
  -3  -2  -8    0.05    2.26
   3   2   8    1.26    1.96
  -3  -2  -9   16.87    2.98
   3   2   9   20.63    4.69
  -3  -2 -10   14.64    2.71
   3   2  10   14.39    4.57
  -3  -2 -11   75.14    4.98
   3   2  11   62.39    7.94
  -3  -2 -12    3.33    2.07
   3   2  12   -4.46    4.19
  -3  -2 -13   22.00    3.15
   3   2  13   10.82    4.34
  -3  -2 -14   24.45    3.08
   3   2  14   14.59    5.04
  -3  -2 -15  161.13    6.59
   3   2  15  167.22   14.38
  -3  -2 -16   48.42    3.72
   3   2  16   52.66    8.88
   3   2  17    0.13    5.71
   3   2  18   21.26    7.83
   3   2  19    4.85    6.77
   3   2  20   12.54    7.47
   3   2  21    6.93    7.75
   3   2  22   19.64    9.78
   3   2  23    0.46    8.06
   3   3 -20    2.35    8.84
  -3  -3  20   14.72    6.80
   3   3 -19   -3.49    9.12
  -3  -3  19    0.42    5.77
   3   3 -18   17.58    9.91
  -3  -3  18   13.33    6.83
   3   3 -17   -0.39    7.30
  -3  -3  17   12.13    6.54
   3   3 -16    3.05    6.71
  -3  -3  16    6.46    5.70
  -3  -3  15   37.10    9.48
   3   3 -15   35.28    9.19
  -3  -3  15   36.26    6.77
  -3  -3  14   90.94    9.46
   3   3 -14   77.36   10.90
  -3  -3  14   82.58   11.99
  -3  -3  13   15.76    7.33
   3   3 -13    3.92    4.97
  -3  -3  13    9.61    4.50
  -3  -3  12   21.25    8.48
   3   3 -12   16.62    6.11
  -3  -3  12   14.17    4.53
  -3  -3  11    3.49    5.44
  -3  -3  11    2.88    3.52
   3   3 -11    4.11    4.48
   3   3 -10   33.67    6.66
  -3  -3  10   37.22    5.69
  -3  -3  10   39.61    8.42
  -3  -3   9   -1.73    5.11
   3   3  -9    5.53    5.03
  -3  -3   9   -1.62    3.50
  -3  -3   8   36.39    7.26
   3   3  -8   22.40    4.96
  -3  -3   8   23.90    4.39
   3   3  -7   -4.08    3.62
  -3  -3   7   -4.39    5.02
  -3  -3   7   -2.24    2.97
   3   3  -6  318.36   14.08
  -3  -3   6  317.22   16.84
  -3  -3   6  290.04   11.96
   3   3  -5   42.79    5.75
  -3  -3   5   58.93    8.14
  -3  -3   4    7.43    3.90
   3   3  -4   10.23    3.74
  -3  -3   3   23.38    5.22
   3   3  -3   22.16    4.48
  -3  -3   2   90.73    9.45
  -3  -3   2   98.12    8.62
   3   3  -2   94.08    7.29
  -3  -3   1  139.95   10.02
   3   3  -1  126.19    8.57
  -3  -3   1  122.97    9.01
  -3  -3   0  448.98   16.31
  -3  -3   0  436.61   16.86
   3   3   0  463.83   15.29
  -3  -3  -1  272.31   12.77
  -3  -3  -1  265.17   13.35
   3   3   1  268.51   12.14
  -3  -3  -2  300.91   12.61
   3   3   2  298.95   12.99
  -3  -3  -2  292.37   14.16
   3   3   2  267.77   12.41
  -3  -3  -3   13.12    5.24
   3   3   3   17.55    4.96
  -3  -3  -3    5.88    3.42
   3   3   3    8.41    3.34
  -3  -3  -4   14.89    6.00
   3   3   4   14.49    3.59
  -3  -3  -4   14.41    3.12
   3   3   4   16.89    5.61
   3   3   5  560.19   15.48
  -3  -3  -5  561.33   15.87
  -3  -3  -5  535.37   20.71
   3   3   5  556.86   20.77
   3   3   6 1852.21   32.79
   3   3   6 1823.07   38.70
  -3  -3  -6 1884.54   27.78
   3   3   6 1885.71   27.01
  -3  -3  -6 1769.98   36.71
  -3  -3  -7    6.30    5.33
   3   3   7    0.93    3.19
   3   3   7    4.02    2.29
  -3  -3  -7    1.04    2.29
  -3  -3  -8  459.04   13.12
   3   3   8  471.01   12.67
   3   3   8  467.00   17.62
  -3  -3  -9  154.88    7.81
   3   3   9  161.15    7.50
   3   3   9  137.34   10.49
   3   3  10   20.81    3.04
  -3  -3 -10   15.85    2.93
  -3  -3 -11   67.85    4.90
   3   3  11   60.55    7.91
  -3  -3 -12   45.96    4.13
   3   3  12   23.85    6.30
  -3  -3 -13   73.51    4.77
   3   3  13   66.62    8.72
  -3  -3 -14  242.07    7.75
   3   3  14  251.84   16.74
  -3  -3 -15   14.80    2.38
   3   3  15   19.19    6.80
   3   3  16    4.86    6.19
   3   3  17   49.03    8.88
   3   3  18   34.75    8.50
   3   3  19    7.75    5.47
   3   3  20   -1.98    7.47
   3   3  21    9.62    6.90
   3   3  22   -1.07    8.40
   3   3  23   14.46    8.52
   3   4 -19   -3.94    9.52
  -3  -4  19   14.20    6.81
   3   4 -18    4.63    8.59
  -3  -4  18   23.53    7.63
   3   4 -17    5.58    8.39
  -3  -4  17    1.07    5.59
   3   4 -16    3.81    6.74
  -3  -4  16    4.67    4.67
   3   4 -15    0.27    6.43
  -3  -4  15   -0.85    4.40
   3   4 -14   -0.32    5.62
  -3  -4  14   -0.59    4.27
  -3  -4  13    0.01    7.16
   3   4 -13    3.30    5.55
  -3  -4  13    8.52    4.80
  -3  -4  12   22.71    8.14
   3   4 -12   19.54    6.19
  -3  -4  12   23.27    5.70
  -3  -4  11    5.75    7.07
   3   4 -11    2.14    4.91
  -3  -4  11   -4.14    3.49
  -3  -4  10    5.56    5.96
   3   4 -10    2.45    4.71
  -3  -4  10    3.78    4.09
  -3  -4   9    5.19    5.94
   3   4  -9    0.78    4.81
  -3  -4   9   -4.89    3.43
  -3  -4   8   33.79    7.87
   3   4  -8   38.08    6.73
  -3  -4   8   37.01    5.10
  -3  -4   7    9.23    6.28
   3   4  -7    6.96    4.23
  -3  -4   7   10.60    3.43
   3   4  -6   24.27    5.47
  -3  -4   6   25.92    4.15
  -3  -4   6   29.80    7.68
   3   4  -5   10.17    4.60
  -3  -4   5    6.08    5.22
  -3  -4   5    7.90    3.02
  -3  -4   4   30.50    3.99
   3   4  -4   31.99    5.64
  -3  -4   4   34.66    7.12
   3   4  -3  116.24    9.45
  -3  -4   3  122.00   11.20
   3   4  -2 1153.41   27.05
   3   4  -1  334.78   15.00
  -3  -4   1  331.38   16.96
   3   4   0  304.81   14.52
  -3  -4   0  316.85   15.32
   3   4   1   67.54    7.44
  -3  -4  -1   66.76    7.76
   3   4   2   41.30    6.47
  -3  -4  -2   21.85    5.21
  -3  -4  -3    8.93    3.95
   3   4   3   -1.26    4.05
  -3  -4  -4    0.61    5.00
  -3  -4  -4    8.37    4.03
   3   4   4    3.88    5.09
  -3  -4  -5    7.89    4.58
  -3  -4  -5   10.38    4.08
   3   4   5    0.39    4.91
   3   4   6  367.14   14.04
  -3  -4  -6  380.82   14.87
  -3  -4  -6  393.84   19.07
   3   4   6  371.43   19.30
  -3  -4  -7  547.82   16.71
   3   4   7  539.45   15.84
  -3  -4  -7  532.13   22.19
  -3  -4  -7  476.05   12.98
   3   4   7  549.89   24.42
   3   4   8  262.04   13.73
  -3  -4  -8  282.35   12.08
   3   4   8  241.79   10.48
  -3  -4  -8  265.93   15.85
   3   4   8  263.78   18.15
  -3  -4  -9   20.53    5.66
   3   4   9   32.69    4.16
  -3  -4  -9   26.91    4.22
   3   4   9   22.78    5.56
  -3  -4 -10    3.43    5.53
   3   4  10    2.25    3.90
   3   4  10    4.36    2.14
  -3  -4 -10    3.27    2.84
  -3  -4 -11   36.45    4.21
   3   4  11   40.02    4.00
   3   4  11   38.68    6.91
   3   4  12   25.60    3.48
   3   4  12   16.10    5.96
  -3  -4 -12   20.80    3.76
  -3  -4 -13   -0.23    2.21
   3   4  13    7.32    4.90
  -3  -4 -14   18.37    2.96
   3   4  14   19.12    6.44
   3   4  15    9.05    5.78
   3   4  16    7.63    5.11
   3   4  17   27.68    7.70
   3   4  18   19.31    8.20
   3   4  19   -2.31    5.49
   3   4  20   -1.96    5.77
   3   4  21    8.04    7.28
   3   4  22    8.53    6.82
   3   5 -17   -4.45    8.81
  -3  -5  17    1.97    5.62
   3   5 -16   10.95    8.07
  -3  -5  16    4.78    5.51
   3   5 -15   -9.20    9.11
  -3  -5  15    4.79    4.30
   3   5 -14    0.09    6.41
  -3  -5  14    2.58    4.35
   3   5 -13   -1.28    5.75
  -3  -5  13   -4.36    4.55
  -3  -5  12    2.61    8.05
   3   5 -12    7.68    5.19
  -3  -5  12    4.49    4.18
  -3  -5  11    1.41    7.56
   3   5 -11   10.50    6.12
  -3  -5  11   -1.51    3.59
  -3  -5  10   13.80    7.24
   3   5 -10    7.94    4.73
  -3  -5  10    8.53    4.17
  -3  -5   9    2.53    7.66
   3   5  -9   -0.63    4.58
  -3  -5   9    1.54    3.57
  -3  -5   8    7.87    6.51
   3   5  -8    6.65    4.61
  -3  -5   8    5.94    3.66
  -3  -5   7   30.03    9.17
   3   5  -7   17.36    6.07
  -3  -5   7   20.59    3.98
  -3  -5   6  126.21    7.50
   3   5  -6  112.90   10.82
  -3  -5   6  123.62   13.78
  -3  -5   5   25.99    7.30
   3   5  -5   41.13    7.12
  -3  -5   5   44.04    4.69
   3   5  -4   33.35    6.50
  -3  -5   4   33.11    3.96
  -3  -5   4   44.61    9.47
  -3  -5   3  107.98    6.03
   3   5  -3  110.33   10.28
  -3  -5   2   99.31    5.39
  -3  -5   2  107.00   12.85
   3   5  -2  101.33    9.57
  -3  -5   1   64.10    9.64
   3   5  -1   46.33    7.32
  -3  -5   0   79.11   10.11
   3   5   0   79.21    9.19
  -3  -5  -1    3.36    5.31
   3   5   1   -0.72    4.42
  -3  -5  -2  190.52   13.49
   3   5   2  215.96   14.30
  -3  -5  -3  135.90   11.22
   3   5   3  145.24   11.76
  -3  -5  -4   31.99    6.27
   3   5   4   30.05    7.18
  -3  -5  -5   -7.04    4.53
   3   5   5    3.22    5.21
  -3  -5  -5    0.41    1.60
   3   5   6   38.42    8.71
  -3  -5  -6   31.06    3.36
  -3  -5  -6   41.41    7.99
  -3  -5  -6   38.09    6.46
   3   5   7    2.22    5.55
  -3  -5  -7    5.16    2.34
  -3  -5  -7    4.47    5.24
  -3  -5  -7    4.57    3.44
  -3  -5  -8    3.98    5.99
  -3  -5  -8    2.15    3.62
   3   5   8    6.52    5.93
  -3  -5  -9  161.27   13.90
   3   5   9  146.18    8.68
  -3  -5  -9  166.27   10.76
   3   5   9  147.54   14.97
  -3  -5 -10  241.79   16.53
   3   5  10  236.18   19.50
   3   5  10  236.90   10.53
  -3  -5 -10  266.10   12.93
  -3  -5 -11    5.31    5.34
   3   5  11   11.26    5.23
   3   5  11    0.85    7.04
   3   5  11    8.79    3.01
  -3  -5 -11    2.52    3.20
  -3  -5 -12   10.44    5.91
   3   5  12    6.56    2.14
   3   5  12    8.30    4.33
  -3  -5 -12    3.86    3.23
   3   5  13   24.12    6.06
  -3  -5 -13   37.15    4.84
  -3  -5 -13   34.91    8.62
  -3  -5 -14   97.59    6.54
   3   5  14  112.72   11.43
   3   5  15    6.76    4.78
   3   5  16    8.60    5.98
   3   5  17    6.22    5.01
   3   5  18   -4.90    5.33
   3   5  19   -4.27    6.23
   3   5  20    1.18    6.29
   3   5  21   -4.38    6.02
   3   5  22   18.67    8.51
   3   6 -16   10.60    9.41
  -3  -6  16    2.83    5.60
   3   6 -15   -0.06    7.64
  -3  -6  15    5.52    6.44
   3   6 -14    4.05    6.87
  -3  -6  14   -1.01    4.64
   3   6 -13   -8.20    6.23
  -3  -6  13    6.64    4.42
   3   6 -12  -11.48    6.44
  -3  -6  12   -3.84    4.29
   3   6 -11   11.76    5.30
  -3  -6  11   -1.01    3.79
  -3  -6  10    1.46    7.01
   3   6 -10   10.11    5.40
  -3  -6  10    0.20    3.16
  -3  -6   9    1.50    7.14
   3   6  -9   21.16    7.14
  -3  -6   9    8.66    4.01
  -3  -6   8    4.91    7.60
   3   6  -8   12.23    5.45
  -3  -6   8   17.09    4.04
  -3  -6   7    6.52    7.24
   3   6  -7    8.74    5.07
  -3  -6   7    6.89    3.16
  -3  -6   6   79.45    5.99
   3   6  -6   77.65    9.97
  -3  -6   6   70.18   12.45
  -3  -6   5   44.59   10.47
   3   6  -5   49.99    8.56
  -3  -6   5   38.98    4.50
   3   6  -4    9.41    5.09
  -3  -6   4   14.01    2.88
  -3  -6   3    6.27    7.02
   3   6  -3    1.63    4.62
  -3  -6   3   -0.94    1.89
   3   6  -2   -1.44    4.41
  -3  -6   2    0.68    6.43
  -3  -6   2    2.45    1.67
   3   6  -1    7.13    6.16
  -3  -6   1   -3.28    6.61
  -3  -6   1    3.07    1.52
   3   6   0   15.65    5.02
  -3  -6   0   11.61    1.63
  -3  -6   0   12.78    5.68
  -3  -6  -1   13.80    6.52
   3   6   1   14.72    6.45
   3   6   2  145.78   12.92
  -3  -6  -2  139.79   13.37
  -3  -6  -3    6.82    6.23
  -3  -6  -3    1.12    1.21
  -3  -6  -4   -0.11    5.17
  -3  -6  -4    6.10    1.43
  -3  -6  -5   35.85    3.08
  -3  -6  -5   49.31    8.06
   3   6   5   39.88    8.56
  -3  -6  -6   28.52    3.25
   3   6   6   34.45    8.47
  -3  -6  -6   39.85    7.62
  -3  -6  -7   36.44    3.94
  -3  -6  -7   38.67    7.22
  -3  -6  -8    3.05    5.24
  -3  -6  -8    0.46    2.32
  -3  -6  -8   -4.00    4.44
  -3  -6  -9   11.04    5.02
   3   6   9   21.68    9.90
  -3  -6  -9   16.98    6.92
   3   6  10    6.36    8.33
  -3  -6 -10    9.72    4.76
  -3  -6 -10    7.20    5.69
  -3  -6 -11   27.02    5.73
   3   6  11   45.89   11.15
  -3  -6 -11   38.54    8.46
  -3  -6 -12   22.21    5.14
  -3  -6 -12   25.10    7.17
  -3  -6 -13   45.29    9.11
  -3  -6 -13   53.25    6.79
  -3  -6 -14   -3.49    5.83
   3   6  14   17.41   10.76
   3   6  14   10.11    5.50
   3   6  15   22.08    5.98
  -3  -6 -15   24.37    8.37
   3   6  16    5.03    5.02
  -3  -6 -16   26.35    9.14
   3   6  17    1.14    5.15
  -3  -6 -17    3.48    6.71
   3   6  18    3.43    5.81
  -3  -6 -18    4.95    8.06
   3   6  19    6.08    6.42
   3   6  20   -6.39    7.20
   3   6  21    2.11    7.72
   3   7 -14    1.00    6.41
   3   7 -13    0.98    7.66
   3   7 -12   -1.58    5.66
   3   7 -11   -6.06    6.83
   3   7 -10    4.73    5.79
   3   7  -9   -5.90    6.29
  -3  -7   8   28.05    4.20
   3   7  -8   21.68    7.30
   3   7  -7   22.33    6.64
  -3  -7   7   17.13    3.41
  -3  -7   6  104.29   15.72
   3   7  -6  128.70   13.75
  -3  -7   6  129.48    6.91
   3   7  -5   30.19    8.01
  -3  -7   5   16.61    8.71
  -3  -7   5   27.33    3.24
   3   7  -4   39.15    8.85
   3   7  -3   34.90    7.57
  -3  -7   3   33.28   10.48
   3   7  -2    1.14    5.52
  -3  -7   2   -3.79    8.19
   3   7  -1   31.81    7.86
  -3  -7   1    9.77    8.01
   3   7   0    2.42    5.72
  -3  -7   0   15.48    8.12
   3   7   1    7.91    6.00
  -3  -7  -1   15.14    7.64
  -3  -7  -2   89.18   12.63
   3   7   2   75.81   11.30
   3   7   3   43.41    9.01
  -3  -7  -3   56.49   11.38
   3   7   4   -8.74    6.86
  -3  -7  -4    9.50    6.69
  -3  -7  -5  292.44   19.35
   3   7   5  265.17   19.24
  -3  -7  -6  144.71    5.55
  -3  -7  -6  200.36   16.05
   3   7   6  190.33   17.18
  -3  -7  -7   97.94   11.99
   3   7   7  133.65   15.74
   3   7   8   23.61    8.15
  -3  -7  -8   23.80    7.44
   3   7   9   56.70   12.50
  -3  -7  -9   70.28   10.08
   3   7  10   55.53   12.17
  -3  -7 -10   43.80    7.97
  -3  -7 -10   32.90    8.70
  -3  -7 -11   73.52   11.30
   3   7  11   68.01   13.07
  -3  -7 -11   54.16    8.73
  -3  -7 -12    0.08    5.95
   3   7  12   -8.16    8.74
  -3  -7 -13   26.79    9.06
   3   7  13   19.49    8.97
  -3  -7 -14   20.19    8.38
   3   7  14    9.46    9.56
  -3  -7 -15   33.22    9.70
   3   7  15   57.55   16.22
  -3  -7 -16   -3.21    7.33
   3   7  16   12.71   10.16
  -3  -7 -17   20.70    9.16
   3   7  17    6.96   12.09
  -3  -7 -18    6.05    8.64
   3   7  18   14.46   13.01
   3   7  19   16.05    7.59
  -3  -7 -19    9.13    8.37
  -3  -7 -20    6.96    8.36
   3   7  20    5.09    6.12
   3   8 -12    5.59    7.56
   3   8 -11   13.43    7.30
   3   8 -10   -1.44    6.76
   3   8  -9    5.77    7.27
   3   8  -8    1.03    6.98
   3   8  -7    9.17    7.19
   3   8  -6    3.19    6.44
   3   8  -5   12.24    6.37
   3   8  -4  165.37   15.23
   3   8  -3    7.94    6.96
  -3  -8   3   -0.12    7.46
  -3  -8   2   44.17   12.07
   3   8  -2   52.54    9.89
   3   8  -1    6.39    6.01
  -3  -8   1   21.18   10.03
   3   8   0   38.99    8.68
  -3  -8   0   53.12   12.17
  -3  -8  -1   72.75   12.71
   3   8   1   65.47   11.47
   3   8   2   24.92    8.03
  -3  -8  -2   31.53    9.50
  -3  -8  -3  112.15   15.06
   3   8   3  105.92   13.12
  -3  -8  -4   14.98    8.62
   3   8   4    8.13    7.02
  -3  -8  -5   18.82    7.91
   3   8   5   19.10    8.03
   3   8   6   65.17   11.55
  -3  -8  -6   62.38   11.39
  -3  -8  -7   11.84    8.25
   3   8   7    3.18    7.76
   3   8   8   11.19    8.02
   3   8   9   10.33    9.49
   3   8  10   16.83    8.87
   3   8  11   16.13   10.30
   3   8  12    2.36    9.25
   3   8  13    9.55   10.41
  -3  -8 -13   10.57    8.33
   3   8  14    2.42    9.25
  -3  -8 -14    1.44    6.62
   3   8  15   25.94   11.91
  -3  -8 -15   -2.27    7.62
   3   8  16   -5.33   10.66
  -3  -8 -16   -5.49    8.69
   3   8  17   91.81   19.69
  -3  -8 -17   18.38   10.29
   3   8  18   40.22   15.30
  -3  -8 -18    4.24    9.31
   3   8  19    3.03   13.07
  -3  -8 -19   -5.01    8.55
   3   9 -10   -5.73    7.62
   3   9  -9   -8.64    7.78
   3   9  -8    5.19    7.34
   3   9  -7   10.09    8.40
   3   9  -6    6.94    9.75
   3   9  -5    4.58    6.85
   3   9  -4    3.35    8.38
   3   9  -3   38.46   10.89
   3   9  -2   24.81    8.18
   3   9  -1   -4.94    6.46
   3   9   0   36.70   10.22
   3   9   1   -4.81    6.75
   3   9   2   -3.22    9.29
   3   9   3    4.90    7.29
   3   9   4    5.84    7.60
   3   9   5    0.79   10.40
   3   9   6   28.18    9.29
   3   9   7   87.58   14.40
   3   9   8    9.13    9.30
   3   9   9   15.73   10.36
   3   9  10  -18.15   10.34
   3   9  11   -4.30    9.49
   3   9  12   -5.86   10.16
   3   9  13    4.99   10.02
   3   9  14   13.88   11.63
   3   9  15   32.34   14.25
   3   9  16   -6.57   11.04
  -3  -9 -16    0.83    8.96
   3   9  17  -28.96   17.94
  -3  -9 -17   14.56    9.35
   3  10  -6   15.65    8.17
   3  10  -5  -16.01    9.72
   3  10  -4    0.41    8.47
   3  10  -3   12.10    8.27
   3  10  -2   11.25    8.86
   3  10  -1   35.58    9.88
   3  10   0    8.61    8.04
   3  10   1   -5.95    7.12
   3  10   2   60.70   12.48
   3  10   3   47.07   11.30
   3  10   4    7.37    8.98
   3  10   5    5.42    8.35
   3  10   6   -0.81    8.25
   3  10   7   26.38    9.72
   3  10   8   -7.39    8.47
   3  10   9   18.26    9.44
   3  10  10   -9.17   13.18
   3  10  11    3.96   10.06
   3  10  12   -1.63    9.75
   3  10  13  -30.29   14.65
   3  10  14  -14.01   12.83
   3  10  15    9.52   14.68
   3  11  -1  -12.73    8.89
   3  11   0   44.21   11.81
   3  11   1   -1.16    8.45
   3  11   2   -6.21    8.54
   3  11   3    8.53    8.83
   3  11   4    7.11    9.77
   3  11   5   18.05   12.14
   3  11   6    4.68    9.53
   3  11   7   27.21   12.16
   3  11   8   -1.48   10.64
   3  11   9   -5.51    9.54
   3  11  10    6.98    9.59
   3  11  11   21.33   13.45
  -4  10  12    3.85   11.22
  -4  10  11   27.94   12.57
  -4  10  10   27.89   13.10
  -4  10  10    6.32    4.57
  -4  10   9    2.08    9.03
  -4  10   8   -0.21    8.04
  -4  10   7   19.64   10.33
  -4  10   6   24.88   11.15
  -4  10   5    8.11    7.74
  -4  10   4   -3.35    7.41
  -4  10   3   30.58    9.87
  -4  10   2   47.84   11.26
  -4  10   1   11.51    8.82
  -4  10   0    0.20    6.69
  -4  10  -1    4.89    6.68
  -4  10  -2    1.95    6.41
  -4  10  -3   -3.44    6.32
  -4  10  -4   -6.15    6.76
  -4   9  15    0.49   11.22
  -4   9  14   40.51   16.35
  -4   9  13   -0.90   10.89
  -4   9  12    0.85    3.85
  -4   9  12    6.03    9.33
  -4   9  11   35.11    6.80
  -4   9  11   41.62   12.98
  -4   9  11   35.90    7.38
  -4   9  10   19.57    5.96
  -4   9  10   19.07    5.33
  -4   9  10   12.92    9.16
  -4   9   9   50.24    8.07
  -4   9   9   47.07   12.68
  -4   9   8   -4.51    7.11
  -4   9   7   -3.64    7.27
  -4   9   6   20.41    9.26
  -4   9   5   32.30   10.16
  -4   9   4   17.13    8.07
  -4   9   3   14.44    7.93
  -4   9   2   12.25    7.68
  -4   9   1   -5.13    6.16
  -4   9   0   -7.44    6.96
  -4   9  -1   10.92    7.36
  -4   9  -2    4.09    5.40
  -4   9  -3   10.58    5.71
  -4   9  -4    3.54    5.70
  -4   9  -5    3.49    5.32
  -4   9  -6    7.60    6.48
  -4   9  -7   -5.81    5.67
  -4   9  -8    9.66    5.93
  -4   8  17   25.11    8.05
  -4   8  17   28.37   12.73
  -4   8  16    4.20    5.79
  -4   8  16    2.78   10.65
  -4   8  15   30.09    7.37
  -4   8  15   27.42   13.32
  -4   8  14    5.45    4.40
  -4   8  14   -1.82   11.22
  -4   8  13   28.71    6.81
  -4   8  13   19.64   11.52
  -4   8  12   -6.05    3.96
  -4   8  12   -4.12    4.68
  -4   8  11   32.04    6.05
  -4   8  11   40.48    7.49
  -4   8  11   28.90   10.41
  -4   8  10   -1.06    3.60
  -4   8  10    1.59    9.52
  -4   8   9   31.57   10.14
  -4   8   9   40.87    6.78
  -4   8   8   17.27    9.03
  -4   8   7  151.08   16.88
  -4   8   6   52.01   10.14
  -4   8   5   10.78    7.44
  -4   8   4    5.47    6.34
  -4   8   3   16.57    7.42
  -4   8   2   15.91    7.41
  -4   8   1    1.45    6.14
  -4   8   0   15.19    6.80
  -4   8  -1    4.00    5.83
   4  -8   2   16.34    5.76
  -4   8  -2    5.07    4.93
   4  -8   3    8.02    4.87
  -4   8  -3   10.52    5.93
   4  -8   4   27.88    6.28
  -4   8  -4   15.98    6.72
   4  -8   5   16.92    6.39
  -4   8  -5   11.10    5.37
   4  -8   6    4.63    5.99
  -4   8  -6   10.54    6.40
   4  -8   7    2.66    5.55
  -4   8  -7   -4.29    5.00
   4  -8   8    3.60    5.83
  -4   8  -8    0.71    4.97
   4  -8   9    2.49    5.76
  -4   8  -9   -4.36    6.23
   4  -8  10   11.38    7.66
  -4   8 -10   21.32    7.27
   4  -8  11    0.69    7.48
  -4   8 -11   -0.34    6.55
  -4   7  18    8.04    6.65
  -4   7  17    6.45    6.69
  -4   7  16   16.57    6.82
  -4   7  16    1.81    9.64
  -4   7  15  116.35   11.89
  -4   7  15  146.41   22.10
  -4   7  14  153.22   12.78
  -4   7  14  169.69   20.65
  -4   7  13   68.65    9.98
  -4   7  13   54.34   13.89
  -4   7  12    2.02    8.06
  -4   7  12   11.54    5.50
  -4   7  12    7.93    3.23
  -4   7  11    2.53    9.68
  -4   7  11    5.28    3.98
  -4   7  11   -2.96    4.64
  -4   7  10   54.92   12.13
  -4   7  10   52.17    6.41
  -4   7   9   24.37    8.77
  -4   7   9   26.53    4.92
  -4   7   8    6.22    8.28
  -4   7   8    7.49    3.58
  -4   7   7   19.34    7.70
  -4   7   6   46.59   10.18
  -4   7   5    7.92    5.45
  -4   7   4  106.46   11.73
  -4   7   3  168.68   14.47
  -4   7   2  143.68   13.46
  -4   7   1   21.52    7.21
   4  -7  -1   10.62    2.74
   4  -7   0   26.04    4.31
  -4   7   0   33.07    7.38
   4  -7   1    4.67    2.93
  -4   7  -1    0.39    4.82
   4  -7   2    1.08    3.36
  -4   7  -2   -6.55    4.60
  -4   7  -3    7.63    5.65
   4  -7   3   19.92    5.18
   4  -7   4   69.37    8.09
  -4   7  -4   60.69    8.90
  -4   7  -5    7.35    5.24
   4  -7   5    9.55    4.52
  -4   7  -6   62.66    8.89
   4  -7   6   75.05    9.46
   4  -7   7    5.91    4.91
  -4   7  -7    7.67    5.31
   4  -7   8    2.52    5.64
  -4   7  -8   13.33    6.13
   4  -7   9    4.72    5.61
  -4   7  -9   10.08    5.86
   4  -7  10    1.83    5.87
  -4   7 -10    2.83    5.26
   4  -7  11    8.18    7.38
  -4   7 -11   20.24    6.63
   4  -7  12    1.77    6.10
  -4   7 -12   15.12    7.56
   4  -7  13   -2.15    6.93
  -4   7 -13    6.64    7.17
   4  -7  14   18.12    9.44
  -4   7 -14   33.13    9.24
  -4   6  19    7.09    6.12
  -4   6  18   10.27    5.58
  -4   6  17    8.86    6.21
  -4   6  16   27.79    7.17
  -4   6  15   12.27    5.97
  -4   6  14    5.79    6.12
  -4   6  13   17.86    4.21
  -4   6  13   18.13    6.07
  -4   6  12    6.36    3.64
  -4   6  12   -3.37    4.22
  -4   6  11   59.40   13.16
  -4   6  11   49.19    5.91
  -4   6  10  117.29   14.62
  -4   6  10  115.55    8.70
  -4   6   9   96.26   12.87
  -4   6   9   86.24    7.82
  -4   6   8   96.34   13.24
  -4   6   8   99.22    8.18
  -4   6   7   71.70   10.95
  -4   6   7   77.81    7.61
  -4   6   6   62.71    9.42
  -4   6   6   64.10    7.14
  -4   6   5   61.57    9.76
  -4   6   4  159.17   13.80
  -4   6   3   -2.56    4.36
   4  -6  -2  444.70    7.84
  -4   6   2  467.08   20.92
   4  -6  -1   13.53    3.03
  -4   6   1   14.08    5.42
  -4   6   0    1.03    3.74
   4  -6   0    2.75    2.19
   4  -6   1   41.32    4.90
  -4   6  -1   42.61    7.32
   4  -6   2   20.69    4.69
  -4   6  -2   33.44    6.63
   4  -6   3   42.66    6.20
  -4   6  -3   39.69    6.58
   4  -6   4    3.50    3.85
  -4   6  -4    1.62    4.18
   4  -6   5    4.85    4.77
  -4   6  -5    4.23    4.29
   4  -6   6    7.99    5.16
  -4   6  -6   -1.60    3.91
   4  -6   7   10.24    5.42
  -4   6  -7   -1.94    3.92
   4  -6   8   -1.81    4.55
  -4   6  -8   -3.99    4.28
   4  -6   9   -5.70    5.31
  -4   6  -9  -10.08    6.07
   4  -6  10   21.69    7.23
  -4   6 -10   24.59    6.57
   4  -6  11   -4.47    6.18
  -4   6 -11    5.15    5.38
   4  -6  12    8.37    7.49
  -4   6 -12    9.39    6.27
   4  -6  13   -8.43    7.57
  -4   6 -13   -1.17    5.36
   4  -6  14    6.52    6.43
  -4   6 -14    8.26    6.07
   4  -6  15   15.83    9.60
  -4   6 -15    2.96    6.47
  -4   5  20   -6.56    7.70
  -4   5  19    5.73    6.67
  -4   5  18   49.46    8.53
  -4   5  17   14.69    6.91
  -4   5  16   30.42    7.26
  -4   5  15    2.53    4.74
  -4   5  14   59.79    8.42
  -4   5  14   48.16    5.46
  -4   5  13   96.74   10.43
  -4   5  13   77.95    6.83
  -4   5  12  120.54   10.92
  -4   5  12  105.86    7.69
  -4   5  11   67.97    6.70
  -4   5  10   27.94    4.27
  -4   5   9    8.32    3.49
  -4   5   8   27.94    4.54
  -4   5   8   16.00    6.52
  -4   5   7    1.28    2.73
  -4   5   7    3.38    6.52
  -4   5   6    5.69    2.49
  -4   5   6   10.46    6.10
  -4   5   5    1.74    3.06
  -4   5   5   16.54    6.72
  -4   5   4   52.48    7.76
  -4   5   3   27.56    6.30
  -4   5   2   83.77    4.20
  -4   5   2  121.69   10.19
   4  -5  -1   24.70    2.91
   4  -5   0   68.55    5.08
  -4   5  -1    1.04    3.29
   4  -5   1    0.06    2.68
   4  -5   2  122.95    8.03
  -4   5  -2  115.80    8.73
   4  -5   3    6.59    3.62
  -4   5  -3   10.80    4.29
  -4   5  -4   32.96    5.88
   4  -5   4   37.73    5.50
   4  -5   5    6.70    3.88
  -4   5  -5    6.51    4.05
   4  -5   6   -1.27    3.75
  -4   5  -6    0.07    3.18
   4  -5   7    2.20    4.48
  -4   5  -7    7.90    4.47
  -4   5  -8   84.33    8.87
   4  -5   8   83.85   10.06
   4  -5   9    0.79    5.07
  -4   5  -9   -5.30    4.92
   4  -5  10   12.50    5.63
  -4   5 -10   19.95    5.80
   4  -5  11    2.93    6.39
  -4   5 -11    0.35    4.53
   4  -5  12    0.01    5.32
  -4   5 -12   -0.98    4.62
   4  -5  13   -6.00    5.58
  -4   5 -13    2.67    5.32
   4  -5  14   10.93    7.25
  -4   5 -14    4.01    6.25
   4  -5  15    0.57    6.56
  -4   5 -15   -0.05    5.69
   4  -5  16    9.57    6.42
  -4   5 -16   20.56    8.98
   4  -5  17   18.26    9.24
  -4   5 -17   -1.92    7.72
  -4   4  21    9.48    7.52
  -4   4  20   10.26    7.40
  -4   4  19    3.00    6.66
  -4   4  18    7.41    4.76
  -4   4  17    7.00    5.32
  -4   4  16  133.59   12.51
  -4   4  15   18.74    4.78
  -4   4  15   21.13    6.00
  -4   4  14    0.85    2.86
  -4   4  14   -2.76    4.93
  -4   4  13    0.52    3.13
  -4   4  13   -5.60    5.56
  -4   4  13   -0.35    2.92
  -4   4  12  144.48    7.69
  -4   4  12  157.93    9.57
  -4   4  12  169.33   13.39
  -4   4  11    0.80    2.49
  -4   4  11   -0.35    2.08
  -4   4  10   19.65    4.15
  -4   4  10   20.90    2.64
  -4   4   9    4.01    1.39
   4  -4  -9    0.11    1.82
  -4   4   9   -0.52    2.15
  -4   4   8  105.20    7.45
  -4   4   7   33.19    4.49
  -4   4   6    7.72    2.58
  -4   4   6   11.44    5.85
  -4   4   5   -0.05    2.38
  -4   4   4   94.01    7.37
  -4   4   4  119.21   10.33
  -4   4   3   12.94    3.41
  -4   4   3   15.46    5.15
  -4   4   2   55.73    6.18
  -4   4   2   55.73    4.10
  -4   4   2   65.66    7.14
  -4   4   1   85.40    7.66
   4  -4  -1   72.48    4.30
  -4   4   0  337.20   13.32
   4  -4   0  315.89    9.87
   4  -4   1   15.36    3.27
   4  -4   1   17.53    5.31
  -4   4  -1   11.65    3.25
   4  -4   2   31.93    4.40
   4  -4   2   40.49    6.62
  -4   4  -2   33.73    4.65
   4  -4   3   30.79    4.94
   4  -4   3   32.58    6.28
  -4   4  -3   30.66    4.75
   4  -4   4   -1.59    3.49
  -4   4  -4    7.71    3.18
   4  -4   5    0.72    3.23
   4  -4   6   13.55    4.42
  -4   4  -6   17.96    4.20
   4  -4   7   -8.22    4.91
  -4   4  -7   -3.37    3.34
   4  -4   8    1.20    4.50
  -4   4  -8    0.09    3.18
   4  -4   9    1.80    5.20
  -4   4  -9    0.11    3.59
  -4   4 -10   44.33    6.66
   4  -4  10   45.53    7.89
   4  -4  11   22.88    7.22
  -4   4 -11   24.35    5.91
   4  -4  12    7.75    5.35
  -4   4 -12    3.11    4.64
   4  -4  13   20.55    6.90
  -4   4 -13   23.30    6.09
   4  -4  14    2.80    5.70
  -4   4 -14    5.99    5.71
   4  -4  15   11.14    8.20
  -4   4 -15   -5.31    7.52
   4  -4  16   23.17    8.48
  -4   4 -16   12.19    7.00
   4  -4  17   -9.72    7.55
  -4   4 -17    9.74    7.02
   4  -4  18    3.61    7.63
  -4   4 -18    3.33    7.88
  -4   3  21    7.46    6.15
  -4   3  20    9.69    6.38
  -4   3  19   -8.40    5.17
  -4   3  18   22.64    6.66
  -4   3  18   36.93    8.29
  -4   3  17   65.53    9.66
  -4   3  17   48.29    7.34
  -4   3  16   72.46    9.83
  -4   3  15    4.53    5.31
  -4   3  14   29.85    6.80
  -4   3  13    2.78    2.86
  -4   3  13   11.15    5.48
  -4   3  12  135.28   11.41
  -4   3  12  121.28    8.66
  -4   3  11    6.15    3.04
  -4   3  10    3.54    3.18
  -4   3   9   -0.26    2.42
  -4   3   8   19.78    3.80
  -4   3   7    0.56    2.15
   4  -3  -7    1.04    2.68
  -4   3   6   10.94    1.82
  -4   3   6    9.07    2.78
  -4   3   5    3.43    2.17
  -4   3   5    7.86    1.79
  -4   3   4  670.54   10.76
  -4   3   4  675.63   18.27
  -4   3   3   62.57    3.77
  -4   3   3   65.04    6.75
  -4   3   3   61.35    5.93
  -4   3   2  184.60    9.76
  -4   3   2  195.09    7.67
  -4   3   2  192.14    6.90
  -4   3   1    4.13    2.83
  -4   3   1   -2.57    2.75
  -4   3   1    1.50    2.74
  -4   3   0   92.62    7.33
   4  -3   0   98.48    5.71
  -4   3   0  113.02    6.58
   4  -3   1   25.79    4.72
  -4   3  -1   21.12    2.91
   4  -3   1   28.80    3.76
   4  -3   2   19.37    4.27
  -4   3  -2   10.78    2.60
   4  -3   2   13.38    2.87
  -4   3  -3   20.55    3.21
   4  -3   3   18.65    4.19
   4  -3   3   17.34    3.27
   4  -3   4  451.42   15.50
  -4   3  -4  429.58   12.27
   4  -3   4  409.00   15.06
   4  -3   5   14.36    4.55
   4  -3   5    5.07    3.24
  -4   3  -5   10.34    2.79
   4  -3   6  168.20   10.41
   4  -3   6  155.81   10.76
  -4   3  -6  156.97    8.52
   4  -3   7   -3.23    3.89
  -4   3  -8   42.41    5.98
   4  -3   8   47.48    7.03
   4  -3   9   11.02    5.16
  -4   3  -9    1.35    3.51
  -4   3 -10   67.44    7.97
   4  -3  10   60.23    8.07
   4  -3  11   23.17    6.32
  -4   3 -11   28.82    6.74
   4  -3  12   -6.57    5.36
  -4   3 -12    0.08    4.41
   4  -3  13    1.67    4.84
  -4   3 -13   -3.48    4.81
  -4   3 -14  125.62   13.33
   4  -3  14  122.50   13.82
   4  -3  15   14.78    6.49
  -4   3 -15    1.89    5.92
   4  -3  16   -9.72    7.12
  -4   3 -16   -6.62    6.37
   4  -3  17   -3.84    6.39
  -4   3 -17    5.91    7.24
   4  -3  18    2.98    8.55
  -4   3 -18   -4.53    7.16
   4  -3  19   -4.54    6.50
  -4   2  21   19.27    7.34
  -4   2  20   44.17    9.92
  -4   2  19    6.35    6.06
  -4   2  18    3.53    4.91
  -4   2  17    5.51    5.50
  -4   2  16    0.70    3.90
  -4   2  16    4.39    5.14
  -4   2  15    8.78    3.95
  -4   2  15    3.57    4.74
  -4   2  14   98.47    8.61
  -4   2  14  128.79   11.89
  -4   2  13   88.97    8.00
  -4   2  13  116.84   11.77
  -4   2  12  138.44    9.60
  -4   2  12  142.63   11.83
  -4   2  11   33.52    5.21
  -4   2  10   10.94    3.89
  -4   2   9    2.22    2.76
  -4   2   8   97.54    7.60
  -4   2   7   16.16    3.56
   4  -2  -6  682.10   16.96
  -4   2   6  681.01   19.79
   4  -2  -5   80.03    6.59
  -4   2   5   66.62    6.25
  -4   2   4 1841.44   29.12
   4  -2  -4 1765.92   26.19
  -4   2   4 1830.49   29.52
  -4   2   3    9.67    2.83
  -4   2   3   14.37    2.57
  -4   2   2  209.51    9.94
  -4   2   2  217.13    8.03
  -4   2   1    0.16    2.99
  -4   2   1    4.52    2.20
  -4   2   1    4.64    2.67
  -4   2   1    7.23    2.43
  -4   2   0   75.62    6.07
  -4   2   0   94.69    4.45
  -4   2   0   82.75    5.66
   4  -2   0   91.39    5.71
  -4   2   0   75.60    6.40
  -4   2  -1    1.69    2.22
   4  -2   1   -5.60    2.26
  -4   2  -1   -0.12    2.55
  -4   2  -1   -0.54    1.30
  -4   2  -2   25.32    4.45
   4  -2   2   39.58    4.04
   4  -2   2   30.09    4.18
  -4   2  -2   25.75    4.22
  -4   2  -2   25.65    2.46
   4  -2   3    4.78    2.65
  -4   2  -3    2.42    2.48
   4  -2   3    5.39    3.04
  -4   2  -3   -0.47    2.61
  -4   2  -3    2.71    1.52
  -4   2  -4  317.28   13.03
   4  -2   4  328.81   13.41
  -4   2  -4  336.80    9.61
   4  -2   5   -2.52    2.39
   4  -2   5    3.68    3.23
  -4   2  -5    3.49    2.70
  -4   2  -5   -1.04    2.13
   4  -2   6  279.28   11.18
   4  -2   6  277.19   13.51
  -4   2  -6  265.98   10.77
   4  -2   7   20.09    4.87
   4  -2   7   12.38    3.85
  -4   2  -7    9.43    3.18
   4  -2   8    4.45    3.93
  -4   2  -8    6.84    4.00
   4  -2   9    4.79    3.90
  -4   2  -9    8.93    3.68
  -4   2 -10   32.43    6.23
   4  -2  10   30.35    6.23
  -4   2 -11   17.54    5.50
   4  -2  11   12.08    4.84
   4  -2  12  134.23   12.63
  -4   2 -12  120.41   11.36
   4  -2  13    8.80    6.25
  -4   2 -13    0.36    4.82
   4  -2  14   13.03    6.21
  -4   2 -14   12.98    6.17
   4  -2  15   29.96    8.46
  -4   2 -15   34.22    8.86
   4  -2  16   77.05   11.55
  -4   2 -17    6.03    4.58
   4  -2  17    8.17    6.29
  -4   2 -18    5.20    3.64
   4  -2  18   10.07    7.33
   4  -2  19    0.63    6.52
   4  -2  20   21.53    9.54
  -4   1  21    4.62    6.97
  -4   1  20   74.93   11.52
  -4   1  19   13.56    6.73
  -4   1  18   12.25    5.63
  -4   1  17    5.25    5.96
  -4   1  16   -0.53    6.19
  -4   1  16   10.45    5.26
  -4   1  15   53.87    7.30
  -4   1  15   57.54    8.22
  -4   1  14  256.65   16.04
  -4   1  14  246.21   13.98
  -4   1  13   21.39    5.63
  -4   1  13   17.11    5.10
  -4   1  12  380.90   18.57
  -4   1  12  341.72   15.29
  -4   1  11   56.10    6.54
  -4   1  10  234.59   12.13
  -4   1   9    2.02    2.85
  -4   1   8   97.62    7.93
  -4   1   7    0.66    2.74
  -4   1   7    0.47    2.68
  -4   1   6  229.53   10.57
  -4   1   5   39.78    4.64
   4  -1  -5   34.84    5.48
  -4   1   4  150.71    7.04
   4  -1  -4  141.78    9.37
  -4   1   3   -0.30    1.53
   4  -1  -3    4.46    3.77
  -4   1   2   14.69    3.25
   4  -1  -2   15.04    3.44
  -4   1   2   18.00    2.14
  -4   1   1   30.61    3.99
  -4   1   1   19.46    4.23
  -4   1   1   26.19    1.64
  -4   1   1   37.36    2.81
  -4   1   0  818.67   17.76
  -4   1   0  764.43   20.76
  -4   1  -1    1.96    3.60
  -4   1  -1    0.62    2.25
   4  -1   1    1.12    2.27
  -4   1  -2    1.13    2.58
   4  -1   2    2.38    2.40
  -4   1  -2    3.92    2.91
   4  -1   3   18.90    3.84
   4  -1   3   23.78    2.22
  -4   1  -3   25.71    3.79
  -4   1  -3   27.31    4.21
  -4   1  -4  242.27   10.69
   4  -1   4  271.35    7.61
   4  -1   4  253.44   11.59
   4  -1   5    1.29    2.69
  -4   1  -5    0.60    2.41
   4  -1   5    0.89    1.91
  -4   1  -6   40.50    4.92
   4  -1   6   47.12    6.12
  -4   1  -6   39.40    5.00
   4  -1   6   43.31    4.21
   4  -1   7   -3.46    3.24
  -4   1  -7   -2.56    2.65
  -4   1  -7   -0.05    2.91
   4  -1   7   -1.31    2.66
   4  -1   8   78.19    7.96
   4  -1   8   74.37    6.41
  -4   1  -8   81.18    6.59
   4  -1   9    2.97    4.14
  -4   1  -9   11.20    3.37
   4  -1  10   91.44    9.70
  -4   1 -10   94.91    7.31
   4  -1  11    9.78    5.29
  -4   1 -11    2.32    3.04
   4  -1  12    5.26    5.14
  -4   1 -12    3.12    3.14
   4  -1  13   -1.88    4.78
  -4   1 -13    1.22    2.74
   4  -1  14   51.90    8.55
  -4   1 -14   57.93    6.57
   4  -1  15   18.83    6.47
  -4   1 -15   11.24    3.67
   4  -1  16   46.51    9.25
  -4   1 -16   44.42    5.92
  -4   1 -17   40.96    5.62
   4  -1  17   36.68    9.27
   4  -1  18   51.71   11.34
  -4   1 -18   50.67    6.34
   4  -1  21   -1.50    6.81
  -4   0  21   -4.36    7.16
  -4   0  20   11.37    6.54
  -4   0  19    8.23    6.17
  -4   0  18   -2.17    5.48
  -4   0  17   12.75    6.62
  -4   0  17   13.59    5.57
  -4   0  16    6.89    6.24
  -4   0  16   12.00    6.34
  -4   0  15    3.90    4.95
  -4   0  15   -1.47    4.70
  -4   0  14   13.00    6.21
  -4   0  14    8.37    5.19
  -4   0  13   16.98    5.56
  -4   0  13    8.19    4.43
  -4   0  12   48.40    8.14
  -4   0  12   39.37    7.04
  -4   0  11   18.58    5.02
  -4   0  11   22.36    5.36
  -4   0  10   55.48    7.15
   4   0 -10   43.63    7.62
  -4   0   9   39.99    6.03
   4   0  -9   21.80    5.54
  -4   0   8  446.01   16.62
   4   0  -8  413.82   18.61
   4   0  -7    0.91    4.00
  -4   0   7    3.37    2.84
  -4   0   6   96.98    8.13
   4   0  -6   95.62    8.11
  -4   0   5   11.15    4.22
  -4   0   5    8.40    3.13
   4   0  -5   14.23    4.49
  -4   0   4   90.21    5.50
   4   0  -4   98.68    6.84
   4   0  -4   83.61    8.50
   4   0  -3   -0.53    2.60
  -4   0   3    3.54    1.93
   4   0  -3   -2.40    4.36
  -4   0   2  669.08   11.49
   4   0  -2  805.84   22.80
  -4   0   1   13.95    1.85
   4   0  -1    6.93    4.76
  -4   0   1   10.99    3.40
  -4   0   0    7.47    3.88
  -4   0   0    5.83    3.04
  -4   0  -1    5.30    2.65
  -4   0  -1    5.72    4.46
  -4   0  -1    3.46    2.82
  -4   0  -2 1423.09   24.81
   4   0   2 1405.11   25.29
  -4   0  -2 1363.50   25.27
  -4   0  -3   -1.02    2.62
  -4   0  -3   -3.37    2.70
   4   0   3   -2.84    2.85
  -4   0  -4  633.51   16.20
   4   0   4  588.92    9.47
   4   0   5   24.26    4.77
  -4   0  -5   15.65    3.20
   4   0   5   22.07    2.97
  -4   0  -6   45.54    4.70
   4   0   6   34.60    5.44
   4   0   6   45.12    3.92
  -4   0  -7   10.05    3.05
   4   0   7    9.81    2.76
   4   0   7    4.99    3.24
  -4   0  -8   16.42    3.42
   4   0   8    8.91    2.85
   4   0   8   10.11    4.54
  -4   0  -9    0.35    2.58
   4   0   9   -1.03    2.79
   4   0   9   -3.46    3.97
   4   0  10   99.58    9.76
  -4   0 -10   93.48    6.99
   4   0  11    3.38    5.08
  -4   0 -11    4.44    2.71
   4   0  12   30.90    7.60
  -4   0 -12   22.33    3.91
   4   0  13   -1.00    4.53
  -4   0 -13    0.13    2.38
   4   0  14    4.01    5.45
  -4   0 -14    3.60    2.58
  -4   0 -15    4.71    3.31
   4   0  16   46.90    9.32
  -4   0 -16   35.03    4.82
   4   0  17   16.51    7.58
  -4   0 -17   15.51    3.88
   4   0  18   11.14    7.29
   4   0  19   20.52    8.61
   4   0  20   36.15   10.41
   4   0  21   -8.77    7.51
  -4  -1  20    4.40    6.08
  -4  -1  19   -1.70    6.32
  -4  -1  18   22.06    7.06
  -4  -1  17    3.01    6.90
  -4  -1  17    6.09    6.16
  -4  -1  16   33.99    8.83
  -4  -1  16   37.05    7.65
   4   1 -16   35.44   10.68
  -4  -1  15   -2.40    5.28
   4   1 -15   -6.42    6.17
  -4  -1  15   10.09    6.23
   4   1 -14    2.88    5.92
  -4  -1  14    5.76    4.99
  -4  -1  14   18.89    5.94
   4   1 -13    9.50    5.91
  -4  -1  13    7.21    4.85
  -4  -1  13    4.42    4.98
  -4  -1  12  115.94   10.10
   4   1 -12  113.64   12.36
  -4  -1  12  102.62   10.45
  -4  -1  11    5.08    3.92
  -4  -1  11   11.13    4.89
   4   1 -11   -3.22    4.68
  -4  -1  10  102.32    9.46
  -4  -1  10   99.53    9.86
   4   1 -10   79.76    9.25
   4   1  -9    4.40    4.37
  -4  -1   9    1.10    4.25
  -4  -1   8  111.27    9.51
   4   1  -8  111.78    9.42
  -4  -1   7   12.19    4.01
   4   1  -7   15.18    4.50
  -4  -1   6    9.98    4.16
   4   1  -6    3.21    3.08
  -4  -1   5   26.71    4.61
   4   1  -5   38.11    4.76
  -4  -1   5   36.58    5.88
  -4  -1   4   32.73    4.25
  -4  -1   4   37.88    5.45
   4   1  -4   43.14    4.61
   4   1  -3    0.99    2.22
  -4  -1   3    3.69    2.49
   4   1  -2    7.78    2.28
  -4  -1   2    6.99    2.55
  -4  -1   2    8.03    3.54
  -4  -1   1   58.63    4.61
   4   1  -1   58.92    8.59
   4   1  -1   65.92    3.98
  -4  -1   0 1531.43   20.70
   4   1   0 1570.78   33.27
   4   1   0 1571.17   16.43
  -4  -1  -1   48.20    5.32
   4   1   1   47.44    3.03
  -4  -1  -1   49.12    7.27
  -4  -1  -2    1.07    4.18
  -4  -1  -2    0.07    3.14
   4   1   2   -1.92    1.72
  -4  -1  -3  120.56    7.90
   4   1   3  130.43    6.21
  -4  -1  -4  205.74    9.85
   4   1   4  200.59   10.86
   4   1   4  204.05    8.88
   4   1   5   66.30    6.91
  -4  -1  -5   64.18    5.79
   4   1   6 1080.24   25.85
  -4  -1  -6 1087.83   21.46
  -4  -1  -7   18.43    3.68
   4   1   7   20.37    4.65
   4   1   7   22.70    5.18
  -4  -1  -8    0.67    2.28
   4   1   8   -0.10    3.30
   4   1   8   -1.43    3.44
  -4  -1  -9   31.43    4.37
   4   1   9   35.48    6.26
  -4  -1 -10   12.76    3.20
  -4  -1 -11   13.24    3.25
  -4  -1 -12    1.48    2.41
   4   1  12    4.13    4.57
  -4  -1 -13   -3.92    2.75
   4   1  13   -3.64    5.37
  -4  -1 -14   42.57    4.57
   4   1  14   47.67    8.34
  -4  -1 -15   19.16    3.79
   4   1  15   27.00    7.12
  -4  -1 -16   19.41    3.67
   4   1  16   29.15    7.95
  -4  -1 -17    7.18    2.90
   4   1  17   -3.41    5.38
   4   1  18   43.04   10.00
   4   1  19    6.89    6.96
   4   1  20   17.65    7.40
   4   1  21   -0.31    7.58
   4   1  22   24.55    9.26
  -4  -2  20   -3.61    6.29
   4   2 -19   10.57   10.46
  -4  -2  19   -9.89    6.85
  -4  -2  18   14.20    8.15
   4   2 -18   34.18   11.50
  -4  -2  18   20.71    7.56
  -4  -2  17    5.59    7.74
   4   2 -17   19.12    8.82
  -4  -2  17    6.25    6.52
  -4  -2  16   -5.09    7.55
   4   2 -16   15.05    8.34
  -4  -2  16    8.17    5.48
  -4  -2  15    9.26    7.87
  -4  -2  15    2.38    4.68
  -4  -2  14   67.59    8.56
   4   2 -14   60.10   10.05
  -4  -2  14   75.82   11.24
  -4  -2  13   -0.76    4.41
  -4  -2  13   -2.38    5.38
   4   2 -13   -5.75    5.43
  -4  -2  12   21.78    5.35
  -4  -2  12   16.20    7.48
   4   2 -12   15.41    5.95
  -4  -2  11   27.28    5.88
  -4  -2  11   23.96    7.30
   4   2 -11   13.02    5.65
  -4  -2  10   49.70    6.95
  -4  -2  10   38.97    7.25
   4   2 -10   28.76    5.99
  -4  -2   9    7.37    3.51
   4   2  -9    7.07    4.68
  -4  -2   9    1.68    4.51
   4   2  -8    3.41    3.82
  -4  -2   8   -0.03    4.06
   4   2  -7   16.27    4.47
  -4  -2   7   18.02    5.55
   4   2  -6  389.20   15.04
  -4  -2   6  473.68   19.61
   4   2  -5   55.78    5.92
  -4  -2   5   68.42    8.13
  -4  -2   4  432.53   15.80
   4   2  -4  409.97   13.72
  -4  -2   3   15.82    4.04
  -4  -2   3   13.75    3.65
   4   2  -3   13.14    3.44
  -4  -2   2  263.59   13.24
   4   2  -2  246.50    9.73
  -4  -2   2  226.91   10.80
   4   2  -1   24.07    3.66
  -4  -2   1   25.79    4.54
  -4  -2   0  772.53   19.60
   4   2   0  801.60   16.12
  -4  -2  -1   89.33    7.40
  -4  -2  -1   88.78    7.08
   4   2   1   97.05    6.30
  -4  -2  -2  165.43    9.92
  -4  -2  -2  162.67   11.75
   4   2   2  158.75    8.34
  -4  -2  -3  146.01    9.07
  -4  -2  -3  175.32   12.69
   4   2   3  167.23    8.96
  -4  -2  -4 1751.48   29.20
  -4  -2  -4 1771.08   37.66
   4   2   4 1765.25   29.92
   4   2   5  223.82   12.02
   4   2   5  238.23   12.14
  -4  -2  -5  235.92   10.66
  -4  -2  -5  199.57   13.37
  -4  -2  -6   35.19    4.57
  -4  -2  -6   39.99    7.21
  -4  -2  -7   87.70    6.82
  -4  -2  -8    8.28    3.16
   4   2   8    6.60    4.04
  -4  -2  -9    1.84    2.51
   4   2   9   12.34    4.42
  -4  -2 -10    6.23    2.51
   4   2  10    5.97    4.14
   4   2  11   21.58    5.80
  -4  -2 -11   21.58    3.57
   4   2  12    0.36    3.81
  -4  -2 -12    5.47    2.69
   4   2  13    4.85    4.47
  -4  -2 -13   -1.00    2.21
   4   2  14    7.31    5.07
  -4  -2 -14    9.46    2.97
  -4  -2 -15    2.02    2.68
   4   2  15   -4.33    5.30
  -4  -2 -16    2.63    2.45
   4   2  16   14.72    6.46
   4   2  17    4.41    5.68
   4   2  18   73.54   10.69
   4   2  19   55.02   10.98
   4   2  20    8.64    7.30
   4   2  21    5.87    7.60
   4   2  22   16.49   10.03
   4   3 -19    5.93    7.97
  -4  -3  19    3.17    5.72
   4   3 -18    7.84    7.70
  -4  -3  18    0.17    5.20
   4   3 -17   -8.65    8.04
  -4  -3  17   -2.05    5.52
  -4  -3  16    2.98    7.28
   4   3 -16   -0.10    6.73
  -4  -3  16   13.71    6.00
  -4  -3  15   -0.56    6.72
   4   3 -15    1.05    6.71
  -4  -3  15    2.88    6.08
  -4  -3  14   91.00   10.14
   4   3 -14   85.53   11.50
  -4  -3  14   81.95   13.10
  -4  -3  13    2.88    6.66
   4   3 -13    8.98    6.35
  -4  -3  13    2.47    4.23
  -4  -3  12   11.15    4.63
   4   3 -12    6.19    5.36
  -4  -3  11   13.18    4.90
  -4  -3  11   15.82    6.81
   4   3 -11    5.07    4.45
  -4  -3  10   -0.38    3.96
  -4  -3  10   -3.48    6.42
   4   3 -10    1.36    4.74
  -4  -3   9    5.56    4.15
  -4  -3   9    1.95    5.28
   4   3  -9    3.78    4.49
  -4  -3   8   11.96    3.85
   4   3  -8    7.17    4.67
  -4  -3   8    6.39    5.20
   4   3  -7    0.42    3.38
  -4  -3   7    2.45    4.96
   4   3  -6  133.83    9.88
  -4  -3   6  172.48   13.53
   4   3  -5    7.91    3.76
  -4  -3   5    3.96    4.55
   4   3  -4  409.38   14.95
  -4  -3   4  482.70   21.08
   4   3  -3   82.65    7.29
  -4  -3   3   87.42    9.42
   4   3  -2  116.86    8.30
  -4  -3   2  119.05   10.07
  -4  -3   1    8.46    4.60
   4   3  -1    9.98    3.52
  -4  -3   1   13.26    4.49
   4   3   0   28.30    4.69
  -4  -3   0   19.70    4.98
  -4  -3   0   24.19    5.36
  -4  -3  -1   74.66    8.01
  -4  -3  -1   55.60    7.15
   4   3   1   71.20    6.94
  -4  -3  -2  997.91   24.85
  -4  -3  -2  938.62   25.86
   4   3   2 1021.54   23.52
  -4  -3  -3  238.63   12.03
   4   3   3  233.93   11.90
  -4  -3  -4   35.17    5.54
   4   3   4   41.57    6.39
  -4  -3  -5  177.46   10.30
  -4  -3  -5  180.36   13.49
   4   3   5  166.26   11.77
  -4  -3  -6 1968.63   31.39
  -4  -3  -6 1980.23   43.12
   4   3   6 2002.01   39.93
   4   3   7  154.81   11.25
  -4  -3  -7  143.61    8.69
  -4  -3  -7  159.26   12.86
   4   3   7  148.48   11.97
  -4  -3  -8  111.98   11.65
  -4  -3  -8  110.05    7.68
   4   3   8  116.63   10.08
  -4  -3  -9   77.18    6.41
   4   3   9   83.18    9.06
  -4  -3 -10   64.87    5.66
   4   3  10   71.48    8.71
  -4  -3 -11   64.62    5.74
   4   3  11   60.35    8.42
  -4  -3 -12  102.72    6.78
   4   3  12  105.68   10.66
  -4  -3 -13   22.00    3.47
   4   3  13   25.35    6.98
  -4  -3 -14   10.50    2.99
   4   3  14    9.47    5.47
  -4  -3 -15    5.26    2.47
   4   3  15   10.29    5.54
   4   3  16   76.63   10.75
   4   3  17  147.94   14.85
   4   3  18   46.25    9.69
   4   3  19    2.83    6.87
   4   3  20    0.12    7.70
   4   3  21   -7.48    7.24
   4   3  22    5.81    9.71
   4   4 -18    5.51    9.39
  -4  -4  18    5.02    5.62
   4   4 -17    5.20    8.05
  -4  -4  17   11.75    6.22
  -4  -4  16    1.19    9.22
   4   4 -16    8.62    8.77
  -4  -4  16    3.76    5.44
  -4  -4  15    3.86    7.61
   4   4 -15    2.88    6.93
  -4  -4  15    5.85    4.77
  -4  -4  14    7.83    7.85
   4   4 -14   10.17    6.34
  -4  -4  14    2.19    5.86
  -4  -4  13   32.21   10.17
   4   4 -13   19.04    7.19
  -4  -4  13    4.15    4.27
  -4  -4  12   21.66    9.66
   4   4 -12   -0.76    5.28
  -4  -4  12   10.96    4.85
  -4  -4  11    6.70    6.77
   4   4 -11   -6.59    5.46
  -4  -4  11   -1.53    3.64
  -4  -4  10  132.75   10.30
   4   4 -10   99.80   10.78
  -4  -4  10  126.68   15.37
  -4  -4   9    4.12    3.45
   4   4  -9   11.83    5.19
  -4  -4   9    3.47    5.89
   4   4  -8    1.73    4.53
  -4  -4   8   -2.80    5.53
  -4  -4   8    3.11    3.39
   4   4  -7   61.27    7.83
  -4  -4   7   63.33   11.16
  -4  -4   7   65.55    6.98
   4   4  -6   38.63    6.52
  -4  -4   6   38.15    8.51
  -4  -4   6   37.61    5.43
  -4  -4   5   10.74    6.01
   4   4  -5   20.39    5.15
  -4  -4   4    3.50    5.43
   4   4  -4    9.18    3.55
  -4  -4   3    4.00    4.76
   4   4  -3    5.39    4.12
   4   4  -2   73.74    7.74
  -4  -4   1    5.06    4.03
   4   4  -1   10.83    4.31
  -4  -4   0   -4.35    4.27
   4   4   0   -0.78    3.59
  -4  -4  -1    6.97    4.59
   4   4   1    0.02    3.68
  -4  -4  -2    7.21    4.09
   4   4   2    1.55    3.80
  -4  -4  -3   13.00    4.40
   4   4   3    6.53    3.78
  -4  -4  -4   -7.57    6.56
  -4  -4  -4   -1.39    3.43
   4   4   4    0.57    4.36
  -4  -4  -5    2.45    4.63
  -4  -4  -5    2.62    3.34
   4   4   5    6.49    4.49
  -4  -4  -6   44.01    6.25
  -4  -4  -6   64.73    8.90
   4   4   6   53.63    8.56
  -4  -4  -7  357.95   14.82
  -4  -4  -7  351.75   20.17
   4   4   7  332.06   19.19
  -4  -4  -8  620.35   19.00
  -4  -4  -8  601.51   25.61
   4   4   8  622.66   26.44
   4   4   9  357.55   17.58
   4   4   9  356.76   21.49
  -4  -4  -9  347.97   14.11
  -4  -4  -9  304.89   18.73
   4   4  10   -0.40    6.18
   4   4  10   -6.07    3.91
  -4  -4 -10    3.82    3.33
  -4  -4 -10    6.80    6.03
   4   4  11  104.10   10.47
  -4  -4 -11  104.57   12.70
  -4  -4 -11  109.26    7.64
  -4  -4 -12  121.51    7.89
   4   4  12  116.20   11.52
  -4  -4 -13  144.95    8.40
   4   4  13  137.94   12.98
  -4  -4 -14   31.39    4.23
   4   4  14   35.74    7.81
  -4  -4 -15  168.48    8.31
   4   4  15  164.98   14.75
   4   4  16   60.98   10.02
   4   4  17    2.07    6.50
   4   4  18   -0.47    6.00
   4   4  19   41.07    9.46
   4   4  20    4.95    6.32
   4   4  21   -5.11    6.36
   4   4  22   -6.82    7.30
   4   5 -16   25.24   10.09
  -4  -5  16   13.34    6.73
   4   5 -15   -5.58    7.35
  -4  -5  15    0.80    5.29
  -4  -5  14   -1.72    9.99
   4   5 -14    4.39    6.57
  -4  -5  14    8.01    5.73
  -4  -5  13  -10.26    7.67
   4   5 -13  -14.46    6.56
  -4  -5  13    2.23    4.20
  -4  -5  12   28.88    9.05
   4   5 -12   38.60    9.83
  -4  -5  12   32.26    6.63
  -4  -5  11    7.27    8.89
   4   5 -11    5.87    5.37
  -4  -5  11   -6.37    3.97
  -4  -5  10   13.62    7.01
   4   5 -10   14.75    5.94
  -4  -5  10   13.70    4.54
  -4  -5   9    9.33    6.51
   4   5  -9    9.79    5.05
  -4  -5   9   13.51    4.76
  -4  -5   8   69.45    7.00
   4   5  -8   58.76    8.54
  -4  -5   8   63.84   12.05
   4   5  -7    7.13    5.13
  -4  -5   7    8.77    3.99
  -4  -5   6   49.48    5.44
   4   5  -6   49.12    8.10
  -4  -5   6   62.84   12.02
   4   5  -5   29.31    6.56
  -4  -5   5   32.43    8.45
  -4  -5   5   16.56    4.07
   4   5  -4   26.65    6.65
  -4  -5   4   26.53    4.19
  -4  -5   4   30.71    8.25
   4   5  -3   40.00    6.92
  -4  -5   2   46.24    9.16
   4   5  -2   27.10    6.38
  -4  -5   1   28.88    7.40
   4   5  -1   22.00    5.52
  -4  -5   0  129.49   12.30
   4   5   0  146.53   11.77
  -4  -5  -1   58.48    8.25
   4   5   1   65.17    8.29
  -4  -5  -2   22.38    6.11
   4   5   2   19.47    6.07
  -4  -5  -3   42.73    7.65
   4   5   3   38.85    7.21
  -4  -5  -4   13.56    5.11
   4   5   4   10.65    5.31
  -4  -5  -5   55.61    7.23
   4   5   5   49.92    8.89
  -4  -5  -6   75.01    8.71
  -4  -5  -6   66.32    9.58
   4   5   6   65.68   10.25
  -4  -5  -7  159.02   11.32
  -4  -5  -7  176.51   14.55
   4   5   7  157.13   15.02
  -4  -5  -8   11.71    6.77
  -4  -5  -8    8.19    4.33
   4   5   8    3.48    6.35
  -4  -5  -9  316.35   14.99
  -4  -5  -9  330.84   20.79
   4   5   9  314.07   21.70
  -4  -5 -10  137.92    9.93
   4   5  10  130.80   15.48
  -4  -5 -10  106.27   12.68
   4   5  11    4.50    7.89
  -4  -5 -11   16.97    7.42
  -4  -5 -11   15.66    4.50
   4   5  12   32.22   11.07
   4   5  12   13.08    5.19
  -4  -5 -12   24.81    4.87
  -4  -5 -12    7.42    6.35
   4   5  13   71.12    9.26
  -4  -5 -13   86.98    7.55
  -4  -5 -13   90.73   13.32
   4   5  14   39.35    8.13
  -4  -5 -14   46.09    5.51
  -4  -5 -14   45.48   10.67
  -4  -5 -15    8.91    6.87
   4   5  15    1.78    6.03
   4   5  16   11.23    5.87
   4   5  17   26.80    7.53
   4   5  18   -0.79    6.19
   4   5  19    8.98    7.22
   4   5  20   -7.16    6.79
   4   5  21    8.41    7.66
   4   6 -15    8.94    8.97
  -4  -6  15    6.49    5.28
   4   6 -14    1.39    7.01
  -4  -6  14   10.61    5.81
   4   6 -13   13.42    8.02
  -4  -6  13    7.65    5.26
  -4  -6  12   10.10    9.55
   4   6 -12   11.96    6.65
  -4  -6  12   16.88    5.68
   4   6 -11    2.09    6.21
  -4  -6  11   10.85    5.07
  -4  -6  10   -6.34    8.45
   4   6 -10    6.51    6.30
  -4  -6  10    4.25    3.59
  -4  -6   9    7.19    7.93
   4   6  -9    8.39    6.03
  -4  -6   9    4.37    4.10
  -4  -6   8   11.72    8.84
   4   6  -8   -0.39    5.70
  -4  -6   8    1.38    3.07
   4   6  -7   13.71    5.88
  -4  -6   7   14.56    3.98
  -4  -6   6   10.95    7.35
   4   6  -6    9.33    5.53
  -4  -6   6    3.56    2.65
  -4  -6   5   64.20    5.86
  -4  -6   5   65.33   11.80
   4   6  -5   61.70    8.97
  -4  -6   4  132.32    7.44
   4   6  -4  159.34   13.42
  -4  -6   4  132.01   15.54
  -4  -6   3    2.47    2.77
   4   6  -3    7.16    5.88
  -4  -6   3   17.41    7.72
   4   6  -2   20.11    6.37
  -4  -6   2    5.80    6.84
  -4  -6   2   20.01    3.47
   4   6  -1   -1.21    5.24
  -4  -6   1    0.18    6.32
   4   6   0   43.38    8.08
  -4  -6   0   33.02    8.22
   4   6   1    6.52    5.29
  -4  -6  -1   -4.68    5.78
   4   6   2    9.40    6.12
  -4  -6  -2    2.70    5.11
   4   6   3   41.98    8.16
  -4  -6  -3   31.14    8.10
   4   6   4   -1.28    5.26
  -4  -6  -4   10.71    5.54
   4   6   5   35.26    8.28
  -4  -6  -5   46.80    7.28
   4   6   6  114.13   12.62
  -4  -6  -6  120.91   11.51
   4   6   7  -13.60    7.88
  -4  -6  -7   -1.81    4.33
  -4  -6  -8  151.35   14.45
  -4  -6  -8  151.69   12.05
   4   6   8  138.70   14.58
  -4  -6  -9   97.25   12.15
  -4  -6  -9  106.90   10.49
   4   6   9   96.50   13.50
  -4  -6 -10   11.94    7.41
  -4  -6 -10    3.35    4.89
   4   6  10    4.96    7.34
  -4  -6 -11   87.37   12.76
  -4  -6 -11  104.10   10.45
   4   6  11  122.51   16.48
  -4  -6 -12    4.80    6.37
  -4  -6 -12   13.30    5.17
   4   6  12    6.54    8.91
  -4  -6 -13   13.80    4.93
   4   6  13    6.26   10.20
  -4  -6 -13   18.96    8.43
   4   6  14   11.09   10.57
  -4  -6 -14   12.69    7.53
   4   6  15   41.55   14.15
  -4  -6 -15    1.96    8.12
   4   6  16   17.51   12.76
   4   6  16   -4.78    5.12
  -4  -6 -16    9.24    7.93
   4   6  17    7.10    5.68
  -4  -6 -17   13.86    8.64
   4   6  18    0.37    6.39
  -4  -6 -18   10.87    8.22
   4   6  19   10.74    8.77
  -4  -6 -19   -8.41    9.62
   4   6  20    5.54    6.46
  -4  -6 -20    9.15    9.16
   4   6  21   11.78    7.13
  -4  -6 -21   -4.99    8.84
   4   7 -13    2.09    7.01
   4   7 -12    2.62    6.53
   4   7 -11    2.41    6.66
   4   7 -10   13.23    6.46
  -4  -7  10   23.10   10.43
   4   7  -9   -7.06    6.11
  -4  -7   9   -9.10    9.19
   4   7  -8   -6.34    5.28
  -4  -7   8   11.19    8.79
   4   7  -7   27.95    8.21
  -4  -7   7   42.42   12.75
   4   7  -6   68.57   10.14
  -4  -7   6   59.26   13.50
  -4  -7   5   20.17    8.69
   4   7  -5   19.67    7.63
   4   7  -4   13.23    5.86
  -4  -7   4   15.77    3.13
  -4  -7   3    0.71    7.98
   4   7  -3    0.51    5.42
  -4  -7   3    0.50    2.08
  -4  -7   2   65.67    4.07
  -4  -7   2   71.24   13.73
   4   7  -2   75.97   10.36
   4   7  -1   15.84    6.82
  -4  -7   1   18.05    2.40
  -4  -7   1   14.94    8.81
   4   7   0    3.69    5.85
  -4  -7   0    1.31    1.38
  -4  -7   0    3.69    6.34
   4   7   1   15.77    6.07
  -4  -7  -1   20.83    7.97
   4   7   2   16.28    6.36
  -4  -7  -2   18.58    8.06
  -4  -7  -3   70.70   10.67
   4   7   3   73.26   10.78
   4   7   4   -0.80    5.98
  -4  -7  -4    0.46    5.59
   4   7   5   16.97    7.32
  -4  -7  -5    1.90    5.29
   4   7   6    4.43    6.46
  -4  -7  -6    7.67    6.58
   4   7   7   45.19   11.09
  -4  -7  -7   46.50    8.89
   4   7   8   44.77   10.52
  -4  -7  -8   39.49    8.25
  -4  -7  -9  157.93   13.70
   4   7   9  140.01   16.47
   4   7  10   11.28    7.92
  -4  -7 -10    7.07    5.18
  -4  -7 -10   17.46    6.83
  -4  -7 -11    8.38    5.53
   4   7  11   -8.46    8.35
  -4  -7 -11    7.56    6.92
   4   7  12   -7.65    8.85
  -4  -7 -12   -4.69    4.95
  -4  -7 -12    1.89    6.68
   4   7  13   63.64   14.56
  -4  -7 -13   64.76    9.09
  -4  -7 -13   58.10   12.26
   4   7  14   14.89    9.67
  -4  -7 -14   31.30   10.69
   4   7  15   42.93   13.56
  -4  -7 -15   37.40   10.45
   4   7  16   21.72   13.13
  -4  -7 -16   14.65    9.06
   4   7  17    0.37   11.68
  -4  -7 -17    5.13    8.77
   4   7  18   43.74   14.81
  -4  -7 -18   -7.96    9.84
   4   7  19   -0.15   12.15
  -4  -7 -19   -1.29    8.16
   4   7  20    1.80   13.96
  -4  -7 -20    6.01    9.44
   4   8 -11   -4.16    8.37
   4   8 -10   -9.48    7.08
   4   8  -9   -6.70    6.39
   4   8  -8   -0.01    6.04
  -4  -8   7   -5.15    9.12
   4   8  -7    6.40    5.99
  -4  -8   6    4.26    8.40
   4   8  -6    2.19    6.46
   4   8  -5   18.18    7.55
   4   8  -4  111.72   13.44
  -4  -8   4  148.19   19.61
   4   8  -3   -3.50    7.72
  -4  -8   3   -5.43    7.92
   4   8  -2   30.78    8.21
  -4  -8   2   24.57   10.30
  -4  -8   1   59.27   13.15
   4   8  -1   95.11   12.13
   4   8   0   14.35    7.51
  -4  -8   0    5.90    7.89
  -4  -8  -1   86.71   13.75
   4   8   1   92.38   12.68
   4   8   2   -1.19    6.43
  -4  -8  -2    5.32    7.15
   4   8   3   12.70    7.81
  -4  -8  -3    1.35    7.23
   4   8   4    4.06    6.82
  -4  -8  -4   -5.61    7.78
   4   8   5   26.41    8.96
  -4  -8  -5   30.14    9.83
   4   8   6   14.74    8.52
  -4  -8  -6   11.39    7.75
  -4  -8  -7  319.52   21.61
   4   8   7  275.56   22.15
  -4  -8  -8   30.85    8.55
   4   8   8   26.78    9.07
  -4  -8  -9   -3.63    6.09
   4   8   9    1.05    7.80
  -4  -8 -10   14.28    6.71
   4   8  10   -0.70    7.84
  -4  -8 -11   12.85    7.21
   4   8  11   -3.18    8.79
  -4  -8 -12    9.76    5.86
   4   8  12  -20.06   10.29
  -4  -8 -13   33.50   10.00
   4   8  13   22.55   11.79
   4   8  14    7.94   10.42
  -4  -8 -14    7.43    7.32
   4   8  15   -7.73    9.66
  -4  -8 -15   -7.92    7.74
   4   8  16   25.09   11.97
  -4  -8 -16    9.68    8.62
   4   8  17   80.48   17.96
  -4  -8 -17   33.43   12.15
   4   8  18   10.17   13.67
  -4  -8 -18   22.39   10.05
   4   9  -8  -14.62    7.02
   4   9  -7   -5.62    6.45
   4   9  -6    2.32    6.79
   4   9  -5   11.08    7.11
   4   9  -4   17.65    8.52
   4   9  -3   35.07   10.42
  -4  -9   3   37.14   13.03
   4   9  -2   41.36    9.96
  -4  -9   2   55.72   13.54
   4   9  -1   92.32   13.73
  -4  -9   1   94.49   16.96
   4   9   0   16.19    8.63
  -4  -9   0    1.52    8.05
   4   9   1   34.41    9.96
  -4  -9  -1   31.77   11.13
   4   9   2   38.67   11.19
  -4  -9  -2   49.48   11.68
   4   9   3   44.93   10.02
  -4  -9  -3   40.86   11.40
   4   9   4    6.98    7.73
  -4  -9  -4   -6.90    9.31
  -4  -9  -5  173.93   18.73
   4   9   5  188.47   19.79
  -4  -9  -6   12.75    7.54
   4   9   6    9.81    9.28
  -4  -9  -7    9.31    9.04
   4   9   7   -8.76    7.96
  -4  -9  -8   19.37    8.82
   4   9   8   29.26   10.32
  -4  -9  -9   49.53   11.01
   4   9   9   63.97   12.79
   4   9  10    5.50    9.97
   4   9  11    2.31    8.85
   4   9  12   23.38   11.89
   4   9  13   16.09   10.57
   4   9  14   31.82   14.61
   4   9  15   18.37   11.70
   4   9  16    1.46   12.78
  -4  -9 -16    3.43    8.39
   4  10  -5    2.72    8.52
   4  10  -4   22.07    9.31
   4  10  -3   14.29    9.53
   4  10  -2   24.37   10.31
   4  10  -1   26.71    9.38
   4  10   0   35.44   10.46
   4  10   1   34.23   10.27
   4  10   2   19.02   10.32
   4  10   3   25.81   12.30
   4  10   4   16.37    9.86
   4  10   5    6.98    8.96
   4  10   6    9.98    9.88
   4  10   7    2.76    8.45
   4  10   8  -12.48   10.18
   4  10   9   12.58   11.86
   4  10  10  -11.73    9.53
   4  10  11    4.09   10.04
   4  10  12   12.66   11.60
   4  10  13    4.61   10.99
   4  10  14   10.01   10.80
   4  11   1    9.52    8.99
   4  11   2    1.18    9.21
   4  11   3   27.09   10.09
   4  11   4    6.62    9.74
   4  11   5   14.12    9.51
   4  11   6    3.45   10.52
   4  11   7   -2.50    8.66
   4  11   8   24.49   12.94
  -5  10   8   -5.84    4.83
  -5  10   8    1.93    7.68
  -5  10   7   -3.97    5.21
  -5  10   7    3.79    7.35
  -5  10   6   -4.98    7.88
  -5  10   5   12.08    8.99
  -5  10   4   12.25    8.60
  -5  10   3   19.72    9.88
  -5  10   2    8.30    7.89
  -5  10   1   15.52    8.19
  -5  10   0   23.21    9.31
  -5  10  -1   19.37    7.99
  -5   9  13   -4.05   10.95
  -5   9  13   -1.57    5.50
  -5   9  12   -5.93    9.19
  -5   9  12   -3.77    4.99
  -5   9  11    0.74    8.90
  -5   9  11    9.98    5.05
  -5   9  10   -3.53    9.88
  -5   9  10    0.31    4.58
  -5   9   9   14.52    9.47
  -5   9   9    8.26    5.03
  -5   9   8   11.03    8.35
  -5   9   8    0.97    4.52
  -5   9   7   13.44    9.21
  -5   9   7    7.77    5.02
  -5   9   6   10.87    7.39
  -5   9   5   11.23    8.60
  -5   9   4   -0.81    6.23
  -5   9   3   21.61    8.31
  -5   9   2   27.27    7.67
  -5   9   1    8.32    7.08
  -5   9   0    8.05    5.69
  -5   9  -1   -3.65    5.37
  -5   9  -2    2.33    5.99
  -5   9  -3   13.82    6.59
  -5   9  -4   -0.45    5.46
  -5   9  -5    2.13    5.75
  -5   9  -6    2.27    5.27
  -5   9  -7    7.11    6.95
  -5   8  15   28.69   12.47
  -5   8  15   28.37    8.99
  -5   8  14    7.92    6.62
  -5   8  13    7.71    6.17
  -5   8  13   18.86    8.94
  -5   8  12   30.34    7.40
  -5   8  12    9.35   10.01
  -5   8  11   58.99    7.98
  -5   8  11   80.92   14.56
  -5   8  10    2.37    4.02
  -5   8  10    5.68    6.88
  -5   8   9    7.08    3.47
  -5   8   9   13.37    8.28
  -5   8   8    4.59    3.52
  -5   8   8  -10.48    7.96
  -5   8   7    2.79    4.68
  -5   8   7   14.12    8.54
  -5   8   6   28.85    8.09
  -5   8   6   30.29    7.16
  -5   8   5    8.66    6.56
  -5   8   4   22.28    7.48
  -5   8   3    6.99    5.54
  -5   8   2    9.04    5.98
  -5   8   1   31.71    7.91
  -5   8   0   11.67    6.66
  -5   8  -1    8.37    5.05
  -5   8  -2   19.30    6.31
  -5   8  -3    8.72    5.94
  -5   8  -4    1.76    4.96
  -5   8  -5   11.96    6.12
  -5   8  -6   15.66    6.07
  -5   8  -7    2.72    5.49
   5  -8   7   -5.57    5.90
  -5   8  -8   14.10    6.20
   5  -8   8   -4.72    5.79
  -5   8  -9    0.70    5.29
   5  -8   9    7.63    7.01
  -5   8 -10    5.71    5.57
   5  -8  10   -1.52    6.52
  -5   7  17   13.83   12.07
  -5   7  17   16.57    7.18
  -5   7  16   15.16   13.22
  -5   7  16   -1.84    5.86
  -5   7  15   49.42   13.73
  -5   7  15   48.88    9.39
  -5   7  14   28.94    9.83
  -5   7  14   24.32    7.05
  -5   7  13  -13.36    9.05
  -5   7  13   -3.06    6.04
  -5   7  12   24.41    9.75
  -5   7  12   10.33    4.23
  -5   7  11    9.18    8.39
  -5   7  11   12.54    4.45
  -5   7  10    0.25    6.90
  -5   7  10    6.71    3.71
  -5   7   9   -2.46    6.58
  -5   7   9    5.46    3.76
  -5   7   8    4.05    6.49
  -5   7   8   -5.81    3.81
  -5   7   7    4.00    5.55
  -5   7   7    4.26    4.00
  -5   7   6    1.08    5.47
  -5   7   6    1.21    4.77
  -5   7   5   -0.07    4.85
  -5   7   5   -5.70    4.04
  -5   7   4   20.92    6.28
  -5   7   3    4.86    4.87
  -5   7   2   66.89    9.34
  -5   7   1   34.80    6.78
  -5   7   0   11.08    5.38
  -5   7  -1   16.85    5.36
   5  -7   1   13.04    3.63
  -5   7  -2   10.52    4.83
   5  -7   2    3.18    3.78
  -5   7  -3    9.88    5.37
   5  -7   3    0.76    4.14
  -5   7  -4   10.99    4.54
   5  -7   4    3.98    4.13
  -5   7  -5    2.85    4.34
   5  -7   5   -2.03    4.10
  -5   7  -6   18.12    5.43
   5  -7   6   20.06    5.79
  -5   7  -7   -2.26    4.16
   5  -7   7    4.99    5.60
  -5   7  -8   -1.62    5.08
   5  -7   8   -2.06    5.60
  -5   7  -9   -1.05    4.51
   5  -7   9   10.54    7.08
  -5   7 -10   21.89    6.81
   5  -7  10   17.52    7.69
  -5   7 -11    8.47    5.77
   5  -7  11    6.46    7.40
  -5   7 -12    6.95    5.53
   5  -7  12    4.10    6.71
  -5   6  18  -10.02    6.46
  -5   6  17   -4.23    6.84
  -5   6  16   53.43    9.64
  -5   6  15   28.80    7.79
  -5   6  14   -1.85    5.39
  -5   6  13   76.27    9.82
  -5   6  13   60.00    6.98
  -5   6  12   95.30    8.82
  -5   6  12   96.32   15.70
  -5   6  11    1.47    2.82
  -5   6  11   -8.82    7.63
  -5   6  10  140.64   16.56
  -5   6  10  108.78    9.20
  -5   6   9   31.49    9.07
  -5   6   9   30.55    5.38
  -5   6   8    1.07    2.90
  -5   6   8    4.52    6.04
  -5   6   7   33.32    8.49
  -5   6   7   25.72    5.44
  -5   6   6   27.05    5.33
  -5   6   6   27.90    7.51
  -5   6   5  141.48   13.41
  -5   6   5  105.05    9.65
  -5   6   4  303.64   17.22
  -5   6   4  298.60   15.79
  -5   6   3   42.34    7.15
  -5   6   3   36.84    6.02
  -5   6   2   29.62    5.71
  -5   6   1   34.44    6.79
   5  -6  -1   18.15    2.68
  -5   6   0  108.77   10.03
   5  -6   0  110.03    6.74
   5  -6   1    3.91    3.17
  -5   6  -1    2.35    3.81
   5  -6   2   -0.78    3.12
  -5   6  -2   -1.15    3.85
   5  -6   3    3.21    3.46
  -5   6  -3   -3.27    4.05
   5  -6   4   29.06    5.78
  -5   6  -4   21.87    4.92
   5  -6   5    0.02    3.74
  -5   6  -5    1.67    3.81
   5  -6   6   11.95    5.29
  -5   6  -6    4.93    3.98
   5  -6   7    9.24    4.71
  -5   6  -7   -3.35    4.31
   5  -6   8    7.91    5.09
  -5   6  -8   20.83    6.24
   5  -6   9    7.68    6.55
  -5   6  -9   -5.41    5.14
   5  -6  10    8.88    6.64
  -5   6 -10    6.15    5.11
   5  -6  11    1.89    6.00
  -5   6 -11   10.28    6.05
   5  -6  12    0.22    5.81
  -5   6 -12    4.33    5.26
   5  -6  13   12.83    7.14
  -5   6 -13    6.58    6.74
   5  -6  14    1.37    6.87
  -5   6 -14   -4.75    6.23
  -5   5  19   12.31    6.78
  -5   5  18   -0.06    5.98
  -5   5  17   -1.17    4.93
  -5   5  16    8.69    7.39
  -5   5  15   -2.21    7.14
  -5   5  14    3.24    3.50
  -5   5  14    1.02    5.27
  -5   5  13   10.21    4.42
  -5   5  12   64.37    6.82
  -5   5  11   85.37    8.05
  -5   5  10   79.62    7.68
  -5   5   9    1.84    2.55
  -5   5   9    3.73    6.24
  -5   5   8    8.39    3.56
  -5   5   8   -1.00    7.12
  -5   5   7    0.51    2.74
  -5   5   7    6.24    6.69
  -5   5   6   33.56    5.58
  -5   5   6   36.49    7.64
  -5   5   5    0.14    3.07
  -5   5   5    4.83    5.02
  -5   5   4   26.17    5.14
  -5   5   4   30.22    6.83
  -5   5   3    4.14    3.62
  -5   5   3    9.36    4.39
  -5   5   2  131.51   10.10
  -5   5   1   17.03    3.38
  -5   5   1   23.78    5.24
   5  -5   0  620.80   14.96
   5  -5   1   10.02    2.71
   5  -5   2   19.95    4.03
   5  -5   3   -1.71    3.09
  -5   5  -3   -0.81    3.27
   5  -5   4    6.65    3.98
  -5   5  -4   12.50    3.93
   5  -5   5    4.99    3.67
  -5   5  -5    4.82    3.46
  -5   5  -6   23.26    5.12
   5  -5   6   38.05    6.45
   5  -5   7    5.83    4.78
  -5   5  -7   -0.03    3.64
  -5   5  -8   59.83    7.59
   5  -5   8   73.58    9.49
   5  -5   9    6.17    4.56
  -5   5  -9    2.94    4.39
   5  -5  10    9.74    6.01
  -5   5 -10    1.96    4.32
   5  -5  11   19.48    7.50
  -5   5 -11   30.96    7.33
   5  -5  12   14.76    7.04
  -5   5 -12   17.23    6.22
   5  -5  13   11.24    6.35
  -5   5 -13   12.61    6.64
   5  -5  14    6.26    6.25
  -5   5 -14   -5.82    7.22
   5  -5  15    3.90    6.77
  -5   5 -15   10.81    7.87
   5  -5  16    9.30    7.53
  -5   5 -16    5.83    7.90
  -5   4  19    7.54    6.54
  -5   4  18    6.68    6.16
  -5   4  17   -6.46    5.90
  -5   4  16   10.39    5.70
  -5   4  15   -4.44    5.70
  -5   4  14    1.30    3.59
  -5   4  14   -5.26    5.47
  -5   4  13    1.41    3.40
  -5   4  12   33.98    6.15
  -5   4  11    0.14    2.66
  -5   4  10    7.58    3.49
  -5   4   9   -0.04    3.06
  -5   4   8   65.08    6.80
  -5   4   7   62.21    6.76
  -5   4   7   77.40   10.21
  -5   4   6  131.99    9.18
  -5   4   6  171.98   13.51
  -5   4   5   37.40    5.50
  -5   4   5   37.70    7.35
  -5   4   4   51.44    6.36
  -5   4   4   68.59    8.17
  -5   4   3    2.44    2.95
  -5   4   3    0.38    3.44
  -5   4   2    7.95    4.28
  -5   4   2    0.18    3.20
  -5   4   1    6.47    2.74
  -5   4   1   10.87    3.04
   5  -4   0   16.13    3.30
  -5   4   0    4.88    3.06
  -5   4   0   15.56    4.48
   5  -4   1   14.68    3.69
  -5   4  -1    7.62    3.61
  -5   4  -1   11.76    2.70
   5  -4   2  423.19   14.66
   5  -4   2  455.26   18.42
  -5   4  -2  415.61   13.31
  -5   4  -2  404.68   17.25
   5  -4   3   -5.39    4.14
  -5   4  -3   -1.35    2.76
   5  -4   3    1.36    3.06
   5  -4   4   -0.43    3.40
  -5   4  -4    4.11    2.88
   5  -4   4    2.55    4.58
   5  -4   5    2.76    3.63
  -5   4  -5   -2.86    3.13
   5  -4   6    1.32    3.75
  -5   4  -7   35.55    5.44
   5  -4   7   49.15    7.65
   5  -4   8   10.58    5.14
  -5   4  -8    7.64    4.23
   5  -4   9   10.19    4.27
  -5   4  -9   15.14    5.02
   5  -4  10   11.97    5.57
  -5   4 -10    2.67    4.00
   5  -4  11   19.12    7.49
  -5   4 -11   10.52    4.83
   5  -4  12   28.17    7.30
  -5   4 -12   32.01    7.21
   5  -4  13   -5.54    5.72
  -5   4 -13    0.80    5.09
   5  -4  14   -5.77    5.39
  -5   4 -14    0.16    5.49
   5  -4  15   -1.73    6.37
  -5   4 -15   -7.86    6.53
   5  -4  16    4.16    7.57
  -5   4 -16    0.54    6.80
   5  -4  17    1.12    6.56
  -5   4 -17   15.16    8.95
  -5   3  20    2.30    6.50
  -5   3  19    1.03    5.81
  -5   3  18   -1.70    5.64
  -5   3  17   -4.31    6.40
  -5   3  16   13.18    6.76
  -5   3  15   15.03    4.94
  -5   3  15    1.31    4.84
  -5   3  14    0.73    3.71
  -5   3  14   12.04    4.97
  -5   3  13   -0.17    3.31
  -5   3  13   -0.77    4.83
  -5   3  12   62.42    7.23
  -5   3  11    9.44    3.05
  -5   3  10   14.45    3.85
  -5   3   9   21.63    4.29
   5  -3  -9   12.06    4.43
  -5   3   8  198.65   11.53
   5  -3  -8  153.84    8.77
  -5   3   7   -0.52    3.11
   5  -3  -7    3.11    3.20
  -5   3   7    3.70    2.15
  -5   3   6   11.21    2.25
  -5   3   6   16.12    4.60
  -5   3   6   19.76    4.96
  -5   3   5    1.88    2.01
  -5   3   5    0.31    2.84
  -5   3   5   -2.02    3.30
  -5   3   4   13.09    4.02
  -5   3   4   11.81    2.67
  -5   3   4   18.85    5.39
  -5   3   3    3.52    3.07
  -5   3   3    6.58    2.27
  -5   3   3    3.78    3.31
  -5   3   2    2.71    3.00
  -5   3   2    7.44    3.11
  -5   3   2    3.62    1.94
  -5   3   1   12.66    4.21
  -5   3   1   13.10    3.08
  -5   3   1    9.97    3.43
  -5   3   1   15.24    3.14
  -5   3   0    6.15    4.22
  -5   3   0    8.22    2.96
  -5   3   0    8.71    3.53
  -5   3   0   11.23    2.76
  -5   3  -1   12.61    3.98
  -5   3  -1   16.72    2.57
   5  -3   1   11.38    3.16
  -5   3  -2    6.27    2.11
   5  -3   2    3.44    2.82
  -5   3  -3   43.55    5.69
   5  -3   3   45.45    5.52
   5  -3   3   42.79    5.60
  -5   3  -3   37.14    3.57
  -5   3  -4   33.33    5.40
   5  -3   4   40.04    5.83
   5  -3   4   35.95    5.24
  -5   3  -4   35.86    3.71
  -5   3  -5   -0.84    2.31
  -5   3  -5   -1.18    2.99
   5  -3   5    6.83    3.84
   5  -3   5   -4.44    4.32
  -5   3  -6    3.25    3.14
  -5   3  -6   -0.12    3.17
   5  -3   6    3.57    4.36
   5  -3   6    3.35    3.65
   5  -3   7    6.40    3.89
  -5   3  -7    6.78    3.99
  -5   3  -7    9.16    3.60
   5  -3   8   61.36    8.10
   5  -3   9   49.24    8.39
  -5   3  -9   42.16    5.94
  -5   3 -10   13.17    5.09
   5  -3  10   13.47    4.87
  -5   3 -11    0.16    4.22
   5  -3  11    1.39    4.66
  -5   3 -12    4.13    5.11
   5  -3  12    8.08    6.34
  -5   3 -13    3.24    4.88
   5  -3  13    8.73    6.74
   5  -3  14    4.28    6.24
  -5   3 -14   -3.69    7.50
  -5   3 -14    3.78    4.95
   5  -3  15    8.46    6.37
  -5   3 -15    5.84    6.60
  -5   3 -15    2.52    3.82
  -5   3 -16    0.65    3.86
   5  -3  16   -0.95    7.10
  -5   3 -17    0.66    4.50
   5  -3  17   11.03    7.67
  -5   3 -18    3.33    4.18
   5  -3  18   -0.93    6.43
  -5   2  19   -6.23    6.53
  -5   2  18    0.98    6.54
  -5   2  17    0.87    5.50
  -5   2  16   -1.31    5.96
  -5   2  15    1.53    4.63
  -5   2  15    1.46    4.94
  -5   2  14    7.01    4.32
  -5   2  14    9.28    6.10
  -5   2  13   39.46    7.21
  -5   2  13   41.08    6.91
  -5   2  12  351.69   16.31
  -5   2  11    0.65    3.36
  -5   2  10   43.58    6.45
  -5   2   9   -0.24    3.55
   5  -2  -8   32.70    6.00
  -5   2   8   49.31    6.58
   5  -2  -7   10.74    4.26
  -5   2   7   11.68    3.58
   5  -2  -6    4.19    3.81
  -5   2   6    2.69    2.69
  -5   2   6    3.46    2.93
   5  -2  -5    2.57    3.49
  -5   2   5    3.17    2.33
  -5   2   5    5.60    3.40
  -5   2   5    1.23    2.50
  -5   2   4  200.64    9.09
  -5   2   4  183.96   10.57
  -5   2   4  171.73    8.12
  -5   2   3   10.27    2.94
  -5   2   3   13.33    2.65
  -5   2   3    9.20    3.43
  -5   2   3   10.89    3.19
  -5   2   2   11.81    2.79
  -5   2   2   10.32    2.02
  -5   2   2   16.41    4.04
  -5   2   2   18.04    3.35
  -5   2   1   -0.46    1.45
  -5   2   1    1.90    3.26
  -5   2   1    1.03    2.58
  -5   2   1    2.52    3.00
  -5   2   1    0.55    1.61
  -5   2   0  171.58    9.98
  -5   2   0  161.64    9.00
  -5   2   0  157.52   10.28
  -5   2  -1    1.98    3.19
  -5   2  -1    2.95    3.52
   5  -2   1    5.86    2.68
  -5   2  -1    3.50    2.92
  -5   2  -2    1.64    2.78
  -5   2  -2    0.89    1.11
   5  -2   2   -1.60    2.58
   5  -2   3    1.81    2.01
  -5   2  -3    1.67    2.80
  -5   2  -3    2.06    1.51
   5  -2   3   -1.08    2.92
   5  -2   4   21.83    3.53
   5  -2   4   15.26    3.60
  -5   2  -4   11.78    3.94
  -5   2  -4   14.00    2.41
  -5   2  -5   49.57    5.94
   5  -2   5   55.24    4.98
   5  -2   5   44.65    5.95
  -5   2  -5   50.64    4.49
   5  -2   6    4.21    2.86
   5  -2   6    7.94    4.48
  -5   2  -6    3.21    2.83
  -5   2  -6    0.22    2.41
   5  -2   7   29.18    5.92
  -5   2  -7   34.71    5.80
   5  -2   7   32.62    5.00
  -5   2  -7   32.85    4.59
  -5   2  -8  185.07   11.10
   5  -2   8  204.86   10.97
   5  -2   8  186.28   13.25
  -5   2  -8  194.83   11.50
  -5   2  -9   10.30    3.85
   5  -2   9   12.46    5.16
  -5   2 -10   41.96    6.75
   5  -2  10   27.97    6.75
  -5   2 -10   34.33    5.53
   5  -2  11   -0.79    5.27
  -5   2 -11    6.23    4.80
  -5   2 -11    0.65    3.09
  -5   2 -12   12.58    4.39
   5  -2  12   18.72    6.12
  -5   2 -13   -0.19    3.24
   5  -2  13    5.91    5.49
  -5   2 -14   -3.23    3.68
   5  -2  14    9.95    5.60
  -5   2 -15    1.53    3.61
   5  -2  15    5.35    5.76
  -5   2 -16    0.25    3.54
   5  -2  16   -1.81    5.61
  -5   2 -17    3.94    3.67
   5  -2  17   16.27    8.48
  -5   2 -18    7.65    4.66
   5  -2  18   -0.24    6.70
   5  -2  19   21.75    9.77
  -5   1  20    8.18    6.99
  -5   1  19   24.50    8.42
  -5   1  18   14.69    6.64
  -5   1  17    3.63    6.28
  -5   1  16   25.49    6.67
  -5   1  16   30.38    7.38
  -5   1  15   -7.98    5.32
  -5   1  15    3.74    4.80
  -5   1  14   59.61    9.15
  -5   1  14   57.74    8.24
  -5   1  13   15.85    5.67
  -5   1  13   22.21    7.40
  -5   1  12   23.90    5.58
  -5   1  11   84.66    8.67
  -5   1  10   72.17    7.94
  -5   1   9   52.10    6.91
  -5   1   8    1.56    3.46
  -5   1   7   12.89    3.80
  -5   1   6   13.65    4.80
  -5   1   6    9.65    3.04
   5  -1  -5    1.39    4.01
  -5   1   5   -0.54    2.71
  -5   1   5    1.01    2.33
   5  -1  -4    5.74    3.75
  -5   1   4    7.97    3.73
  -5   1   4    9.38    2.25
   5  -1  -3   43.15    6.78
  -5   1   3   49.63    5.34
  -5   1   3   51.60    3.62
  -5   1   3   52.58    5.87
  -5   1   2  438.39   14.39
  -5   1   2  406.88    7.59
  -5   1   2  449.34   16.02
  -5   1   1   16.08    3.68
  -5   1   1   15.55    3.70
  -5   1   0  524.62   16.43
  -5   1   0  565.49   17.88
  -5   1  -1   -0.12    3.67
  -5   1  -2    0.08    2.64
   5  -1   2    3.57    3.48
  -5   1  -3    3.28    2.54
   5  -1   3    3.41    3.38
  -5   1  -4  374.76   14.45
   5  -1   4  407.99    7.45
   5  -1   4  376.77   15.44
   5  -1   5    6.99    3.75
  -5   1  -5    9.50    3.39
   5  -1   5   12.44    2.47
   5  -1   6  571.13   20.30
   5  -1   6  575.03   13.09
  -5   1  -6  567.82   17.99
   5  -1   7  135.39   10.49
   5  -1   7  143.21    7.45
  -5   1  -7  128.91    9.09
  -5   1  -8   85.49    7.76
   5  -1   8   86.97    6.64
   5  -1   8   88.33    9.48
  -5   1  -9   63.33    6.71
   5  -1   9   54.80    5.82
   5  -1   9   64.10    8.50
  -5   1 -10  162.23   10.33
   5  -1  10  165.92   13.37
  -5   1 -11   12.26    3.87
   5  -1  11    9.29    5.53
  -5   1 -12    2.76    3.24
   5  -1  12   11.41    6.09
  -5   1 -13    3.94    3.99
   5  -1  13    0.85    4.63
  -5   1 -14    9.86    4.11
   5  -1  14   11.96    6.33
  -5   1 -15   -3.02    4.10
   5  -1  15   -2.45    5.48
  -5   1 -16   -3.55    3.51
   5  -1  16   -3.00    6.19
  -5   1 -17   61.62    7.29
   5  -1  17   64.03   10.86
   5  -1  18   10.33    8.34
   5  -1  19   16.96    8.39
   5  -1  20   39.52   11.88
  -5   0  20   53.58   10.19
  -5   0  19   10.35    7.01
  -5   0  18    3.20    6.10
  -5   0  17   -0.74    6.03
  -5   0  16   13.45    5.29
  -5   0  16   19.42    7.86
  -5   0  15   29.69    7.23
  -5   0  15   36.53    8.72
  -5   0  14    5.00    5.17
  -5   0  14    2.29    5.00
  -5   0  13   48.41    8.03
  -5   0  13   37.56    7.59
  -5   0  12  192.32   14.11
  -5   0  12  181.17   13.26
  -5   0  11    7.94    4.00
  -5   0  10  541.96   21.10
  -5   0   9   53.29    7.68
  -5   0   8    2.35    4.19
  -5   0   7    7.94    3.95
  -5   0   6    5.94    4.28
  -5   0   6    5.85    2.51
  -5   0   5    2.44    4.06
  -5   0   5   -0.32    2.77
  -5   0   4  156.97    7.56
  -5   0   4  164.52   10.46
  -5   0   3   -0.67    2.70
  -5   0   3    1.31    1.82
  -5   0   2  562.03   11.10
  -5   0   2  590.81   19.00
  -5   0   1   69.44    3.21
  -5   0   1   67.87    6.60
  -5   0  -1   14.98    3.51
  -5   0  -2    2.34    4.34
  -5   0  -2    0.21    2.89
   5   0   3    4.71    3.20
  -5   0  -3    1.17    4.33
  -5   0  -3   -0.62    3.41
  -5   0  -4   58.82    6.11
   5   0   4   46.37    6.01
   5   0   5    2.87    3.16
  -5   0  -5    0.90    2.49
   5   0   5    2.15    1.42
  -5   0  -6  217.27   10.90
   5   0   6  196.20   12.14
   5   0   6  198.46    7.13
  -5   0  -7   29.48    4.61
   5   0   7   36.95    6.96
   5   0   7   38.49    3.95
  -5   0  -8  135.20    8.80
   5   0   8  140.76   11.42
   5   0   8  128.03    7.72
  -5   0  -9    1.04    2.72
   5   0   9    2.76    2.73
   5   0   9    5.18    3.83
   5   0  10   54.37    7.92
  -5   0 -10   52.55    5.71
   5   0  11   53.89    8.11
  -5   0 -11   50.64    5.76
   5   0  12   46.60    7.92
  -5   0 -12   40.41    5.42
   5   0  13   10.72    5.30
  -5   0 -13    5.53    3.03
   5   0  14   19.85    7.63
  -5   0 -14    9.85    3.44
   5   0  15   42.06    9.25
  -5   0 -15   24.24    4.49
   5   0  16   12.64    7.41
  -5   0 -16    6.76    3.47
   5   0  17    8.43    7.18
  -5   0 -17   -1.32    3.08
   5   0  20   66.46   13.57
   5   0  21   -9.82    7.54
  -5  -1  19    7.52    8.52
  -5  -1  18  -10.24    7.04
  -5  -1  17   15.56    6.84
  -5  -1  17    2.94    7.36
  -5  -1  16   -9.13    5.68
  -5  -1  16   21.71    9.34
  -5  -1  15    5.63    5.52
  -5  -1  15    3.63    6.17
  -5  -1  14    6.26    4.69
  -5  -1  14    9.20    5.40
   5   1 -14   13.98    8.51
  -5  -1  13   -2.46    5.82
  -5  -1  13    4.78    5.19
   5   1 -13    7.99    6.77
  -5  -1  12    5.49    5.68
  -5  -1  12    9.62    5.74
  -5  -1  11    3.47    5.45
   5   1 -11   -3.84    5.06
  -5  -1  11    7.37    4.70
   5   1 -10    2.50    4.57
  -5  -1  10    2.48    4.67
   5   1  -9   37.18    6.69
  -5  -1   9   22.57    5.62
  -5  -1   8  534.97   21.24
   5   1  -8  507.50   20.12
  -5  -1   7   15.67    4.67
   5   1  -7   20.16    5.59
  -5  -1   6    3.24    4.26
   5   1  -6   -0.59    3.19
  -5  -1   5   -0.86    3.73
  -5  -1   5    0.01    3.01
   5   1  -5   -5.57    3.52
  -5  -1   4   19.47    5.16
  -5  -1   4   13.32    3.33
   5   1  -4   16.45    3.76
  -5  -1   3    1.81    3.43
  -5  -1   3   -0.99    2.41
   5   1  -3   -0.89    2.33
  -5  -1   2   18.90    4.77
  -5  -1   2   16.15    3.20
   5   1  -2   10.89    2.62
  -5  -1   1   33.43    4.15
  -5  -1   1   32.34    5.54
   5   1  -1   28.84    3.03
  -5  -1   0   -0.19    2.78
  -5  -1   0    0.54    2.32
   5   1   0    0.61    1.34
   5   1   1    4.60    1.57
  -5  -1  -1    0.41    4.04
  -5  -1  -1    5.29    3.72
   5   1   2  974.56   11.50
  -5  -1  -2  991.84   29.46
  -5  -1  -2  971.91   24.09
   5   1   3  268.51    7.00
  -5  -1  -3  275.31   16.97
  -5  -1  -3  268.18   12.50
   5   1   4  268.00    8.84
  -5  -1  -4  251.35   12.22
  -5  -1  -4  248.12   15.73
  -5  -1  -5   24.41    6.56
   5   1   5   21.98    5.13
   5   1   5   22.93    3.32
  -5  -1  -5   20.50    4.04
   5   1   5   20.63    3.57
  -5  -1  -6    8.58    5.64
  -5  -1  -6    3.94    3.07
   5   1   6    0.27    2.31
   5   1   6    9.66    4.03
  -5  -1  -7   23.66    4.58
   5   1   7   13.94    3.49
   5   1   7   13.04    4.60
  -5  -1  -8    5.18    3.21
   5   1   8    3.47    3.11
   5   1   8    3.22    3.86
  -5  -1  -9   -0.77    2.79
   5   1   9    6.15    4.19
   5   1   9    0.12    4.40
   5   1  10  219.25   14.92
  -5  -1 -10  221.01   11.37
   5   1  11    9.47    5.05
  -5  -1 -11   21.17    4.19
   5   1  12    5.56    4.49
  -5  -1 -12   10.90    3.39
   5   1  13    5.67    5.49
  -5  -1 -13    7.15    2.90
  -5  -1 -14   79.70    7.14
  -5  -1 -15   52.94    5.93
   5   1  16  143.20   14.71
  -5  -1 -16  176.17   10.21
   5   1  17   25.64    8.24
   5   1  18  113.57   14.85
   5   1  19   13.15    7.66
   5   1  20    4.81    7.87
   5   1  21    9.25    8.94
  -5  -2  18    7.55    6.62
  -5  -2  17    6.43    8.00
   5   2 -17   20.39   10.10
  -5  -2  17    4.69    6.35
  -5  -2  16   10.51    8.48
   5   2 -16    9.72    8.71
  -5  -2  16    3.48    5.25
  -5  -2  15    0.87    7.33
  -5  -2  15    8.40    5.47
   5   2 -15   -9.38    6.31
  -5  -2  14   23.78    6.79
  -5  -2  14   39.16    9.52
   5   2 -14   44.06   10.38
  -5  -2  13   -1.62    4.75
   5   2 -13   -1.27    6.33
  -5  -2  13    3.87    5.75
   5   2 -12   28.35    8.47
  -5  -2  12   38.19    7.32
  -5  -2  12   32.40    7.67
   5   2 -11   17.78    7.15
  -5  -2  11    1.13    4.34
  -5  -2  11    7.34    6.46
   5   2 -10    4.99    5.49
  -5  -2  10    3.49    4.78
  -5  -2  10    5.45    6.85
  -5  -2   9    4.39    4.61
   5   2  -9   -5.33    4.53
  -5  -2   8    8.23    5.89
   5   2  -8    6.14    4.27
  -5  -2   7    6.85    5.70
   5   2  -7   -7.06    4.39
  -5  -2   6    1.95    4.08
   5   2  -6   -2.36    3.08
  -5  -2   5   26.45    6.48
   5   2  -5   25.75    4.86
   5   2  -4   15.70    3.98
  -5  -2   4   16.55    5.52
  -5  -2   3   60.21    7.82
   5   2  -3   56.47    5.41
  -5  -2   3   62.21    6.40
  -5  -2   2  325.20   15.51
   5   2  -2  309.39   10.85
  -5  -2   2  304.47   13.04
   5   2  -1   93.63    5.87
  -5  -2   1   86.60    7.13
  -5  -2   0   41.05    6.21
   5   2   0   38.22    4.18
  -5  -2   0   40.31    5.32
  -5  -2  -1   79.65    7.72
  -5  -2  -1   81.68    6.88
   5   2   1   78.80    5.46
  -5  -2  -2  269.85   13.43
  -5  -2  -2  246.66   15.86
   5   2   2  271.72    9.79
  -5  -2  -3   15.08    5.05
  -5  -2  -3   14.22    4.18
   5   2   3   16.93    3.38
  -5  -2  -4    5.95    5.78
   5   2   4    4.89    2.85
  -5  -2  -4    5.47    3.55
   5   2   5   34.42    5.37
  -5  -2  -5   17.75    6.47
  -5  -2  -5   20.37    4.59
   5   2   6   21.80    4.81
  -5  -2  -6    6.92    5.42
  -5  -2  -6   19.65    4.42
   5   2   6   21.11    4.74
   5   2   7   20.89    5.70
   5   2   7   21.05    5.30
  -5  -2  -7   24.60    4.56
  -5  -2  -7   24.22    6.93
   5   2   8    5.67    4.15
  -5  -2  -8   -3.78    3.27
  -5  -2  -8    8.99    5.90
  -5  -2  -9   26.36    4.33
   5   2   9   25.86    6.78
  -5  -2 -10    8.55    3.76
  -5  -2 -11   -2.22    2.97
   5   2  12  126.24   12.30
  -5  -2 -12  129.78    8.57
   5   2  13  139.54   13.41
  -5  -2 -13  142.42    9.13
   5   2  14  238.22   17.55
  -5  -2 -14  250.12   11.72
  -5  -2 -15   34.09    4.76
   5   2  15   33.70    8.27
  -5  -2 -16   34.43    5.16
   5   2  16   27.41    7.53
   5   2  17   11.07    7.77
   5   2  18    9.48    7.28
   5   2  19   10.59    7.43
   5   2  20   -6.04    6.74
   5   2  21  -16.66   10.07
  -5  -3  18    0.28    9.68
   5   3 -18   -8.82    8.71
  -5  -3  18   -2.11    5.69
  -5  -3  17    1.09    8.02
   5   3 -17   -4.52    7.24
  -5  -3  17    8.84    6.65
  -5  -3  16   16.08    9.84
   5   3 -16   15.30    7.85
  -5  -3  16    0.93    5.63
  -5  -3  15    2.07    8.15
   5   3 -15    2.39    7.23
  -5  -3  15   -1.53    4.68
  -5  -3  14    1.13    7.02
  -5  -3  14    4.91    5.24
   5   3 -14   19.68    7.56
  -5  -3  13    8.74    4.95
  -5  -3  13    1.20    7.79
   5   3 -13   12.81    6.99
  -5  -3  12   -4.18    4.76
  -5  -3  12   13.99    7.37
   5   3 -12    1.04    5.73
  -5  -3  11    8.09    5.18
   5   3 -11    4.79    5.79
  -5  -3  11   -5.34    6.16
   5   3 -10   11.12    5.03
  -5  -3  10   21.28    6.04
  -5  -3  10   16.43    8.29
   5   3  -9   20.11    5.66
  -5  -3   9   20.15    5.38
  -5  -3   9   24.32    6.75
  -5  -3   8   -0.71    5.69
   5   3  -8   21.90    5.51
  -5  -3   7   -8.82    6.39
   5   3  -7    1.95    4.39
  -5  -3   6    2.03    4.76
   5   3  -6    2.12    3.48
  -5  -3   5   65.59    9.70
   5   3  -5   55.10    6.63
  -5  -3   4    9.81    6.10
   5   3  -4    6.49    3.37
  -5  -3   3   58.53    8.02
   5   3  -3   54.76    6.00
  -5  -3   2  527.80   20.98
   5   3  -2  501.83   16.21
  -5  -3   1  279.57   15.19
   5   3  -1  281.28   12.00
  -5  -3   1  241.24   14.11
  -5  -3   0  230.79   13.54
  -5  -3   0  191.97   12.43
   5   3   0  223.65   10.61
  -5  -3  -1   35.15    5.72
  -5  -3  -1   34.40    6.44
   5   3   1   37.13    5.05
   5   3   2    8.54    2.92
  -5  -3  -2   10.88    4.04
  -5  -3  -2    8.34    3.97
  -5  -3  -3    0.34    4.88
   5   3   3    6.17    3.89
  -5  -3  -3    7.08    4.34
  -5  -3  -4   14.65    6.50
  -5  -3  -4   18.80    4.69
   5   3   4   28.85    5.25
  -5  -3  -5    4.33    5.49
   5   3   5    8.73    4.75
  -5  -3  -5    5.82    3.31
   5   3   6   14.57    4.97
  -5  -3  -6   11.23    4.14
  -5  -3  -7  126.21    9.31
   5   3   7  126.97   11.22
   5   3   8    7.15    5.66
   5   3   8    4.92    4.53
  -5  -3  -8   -3.14    5.33
  -5  -3  -8    7.17    3.98
   5   3   9   53.47    8.41
   5   3   9   63.88    9.73
  -5  -3  -9   69.30    6.96
  -5  -3  -9   70.39   10.35
   5   3  10   23.98    6.91
  -5  -3 -10   18.87    7.15
  -5  -3 -10   16.86    4.30
  -5  -3 -11  163.34    9.86
   5   3  11  179.80   14.00
  -5  -3 -12  494.12   16.51
   5   3  12  512.95   23.79
  -5  -3 -13   88.40    7.35
   5   3  13   88.76   10.96
  -5  -3 -14   43.76    5.40
   5   3  14   52.86    9.32
   5   3  15    7.21    5.56
  -5  -3 -15    8.07    3.55
   5   3  16   -2.48    6.00
   5   3  17  -11.03    6.49
   5   3  18   -7.85    6.82
   5   3  19   -0.59    5.80
   5   3  20    4.11    8.06
   5   3  21    5.49    7.86
  -5  -4  17  -11.27    9.27
   5   4 -17   -6.29    9.74
  -5  -4  17   -0.09    5.65
  -5  -4  16    6.22    8.11
   5   4 -16    8.76    8.85
  -5  -4  16    8.56    5.49
  -5  -4  15    8.73    8.23
   5   4 -15   -5.53    7.29
  -5  -4  15    1.40    4.82
  -5  -4  14  -13.84    9.95
   5   4 -14    3.66    6.92
  -5  -4  14   -2.50    5.46
  -5  -4  13   -0.06    7.62
   5   4 -13    8.01    6.27
  -5  -4  13   -4.64    4.94
  -5  -4  12   27.28    9.46
   5   4 -12   27.40    8.91
  -5  -4  12   31.33    6.68
  -5  -4  11    0.65    7.22
  -5  -4  11   -0.71    4.78
   5   4 -11   13.34    6.07
  -5  -4  10   35.34    6.46
  -5  -4  10   35.61   10.73
   5   4 -10   28.55    6.99
  -5  -4   9    4.65    4.03
  -5  -4   9   17.40    8.47
   5   4  -9    5.02    5.18
  -5  -4   8   17.81    4.83
   5   4  -8   21.19    5.77
  -5  -4   8    3.93    5.51
   5   4  -7   74.02    8.73
  -5  -4   7   73.74   10.63
   5   4  -6   32.92    6.30
  -5  -4   6   30.30    8.17
   5   4  -5   31.02    5.83
  -5  -4   5   26.08    7.45
  -5  -4   4  160.60   13.97
   5   4  -4   99.35    9.02
  -5  -4   3  249.27   16.32
   5   4  -3  214.77   12.36
   5   4  -2  120.29    9.85
  -5  -4   1   78.42    9.92
   5   4  -1   86.11    8.23
  -5  -4   0  285.52   16.76
   5   4   0  260.38   13.24
  -5  -4  -1   -4.87    5.22
   5   4   1    1.06    3.77
  -5  -4  -2   -3.59    3.85
   5   4   2   -2.21    3.55
  -5  -4  -3   17.78    4.84
   5   4   3   23.44    5.44
  -5  -4  -4    0.60    3.82
   5   4   4   -1.60    4.52
  -5  -4  -5   15.11    7.48
  -5  -4  -5    0.10    4.05
   5   4   5   14.76    4.76
  -5  -4  -6   11.22    6.44
  -5  -4  -6    1.80    3.70
   5   4   6    4.59    4.96
  -5  -4  -7  188.42   12.04
  -5  -4  -7  211.28   16.73
   5   4   7  187.07   14.38
  -5  -4  -8   92.78    8.67
  -5  -4  -8   84.32   11.94
   5   4   8   85.45   10.96
  -5  -4  -9  145.41   10.50
  -5  -4  -9  149.31   14.96
   5   4   9  168.66   14.58
  -5  -4 -10  553.49   18.88
  -5  -4 -10  565.18   27.07
   5   4  10  555.75   27.09
   5   4  11  570.85   24.93
   5   4  11  603.17   29.40
  -5  -4 -11  539.00   18.35
  -5  -4 -11  549.28   27.35
   5   4  12   46.54   11.04
   5   4  12   34.68    7.22
  -5  -4 -12   21.20    8.53
  -5  -4 -12   39.35    5.56
   5   4  13   39.15    8.05
  -5  -4 -13   28.91    4.80
  -5  -4 -13   33.04    9.89
   5   4  14   33.00    8.27
  -5  -4 -14   29.72    4.89
   5   4  15   -2.66    5.49
  -5  -4 -15   -1.11    2.93
   5   4  16   -6.00    5.65
   5   4  17    1.87    6.34
   5   4  18    7.84    8.68
   5   4  19    3.64    7.62
   5   4  20   19.18    8.46
   5   4  21    6.81    6.80
  -5  -5  15   15.60   10.13
  -5  -5  15   -4.17    5.70
  -5  -5  14   20.70    9.88
   5   5 -14   10.41    7.91
  -5  -5  14   14.15    6.13
  -5  -5  13   -0.43    8.75
   5   5 -13   -3.35    5.98
  -5  -5  13   -2.14    5.03
  -5  -5  12   -3.66    8.76
   5   5 -12   16.55    7.45
  -5  -5  12    3.52    5.38
  -5  -5  11    5.67    8.20
   5   5 -11    2.91    6.28
  -5  -5  11   -1.48    4.56
  -5  -5  10  -10.81    9.80
   5   5 -10   -0.38    5.00
  -5  -5  10    5.80    5.01
  -5  -5   9   15.27    8.03
   5   5  -9   23.64    6.67
  -5  -5   9   17.73    4.79
  -5  -5   8   42.24    6.47
  -5  -5   8   40.74   10.23
   5   5  -8   35.51    7.47
  -5  -5   7   12.57    4.34
  -5  -5   7   20.41    8.73
   5   5  -7    6.82    4.49
  -5  -5   6    9.96    4.34
   5   5  -6    1.05    4.59
  -5  -5   6    4.61    6.11
   5   5  -5   90.29    9.55
  -5  -5   5   75.10   11.90
  -5  -5   4   14.18    8.03
   5   5  -4   25.21    6.19
   5   5  -3    1.24    4.07
  -5  -5   2  174.22   16.03
   5   5  -2  186.72   13.05
  -5  -5   1    8.85    5.74
   5   5  -1    1.98    4.64
  -5  -5   0   44.10    8.54
   5   5   0   65.80    7.96
  -5  -5  -1   63.35   10.26
   5   5   1   75.33    9.23
  -5  -5  -2  287.05   17.54
   5   5   2  291.25   16.46
  -5  -5  -3   81.26    9.41
   5   5   3   88.81    9.72
  -5  -5  -4   15.84    5.63
   5   5   4   32.39    6.74
  -5  -5  -5    6.85    4.31
   5   5   5    9.57    5.45
  -5  -5  -6    2.90    6.83
  -5  -5  -6    1.91    3.95
   5   5   6   -1.88    5.58
  -5  -5  -7  335.88   17.14
   5   5   7  319.64   20.02
  -5  -5  -7  343.76   21.25
  -5  -5  -8  389.46   17.92
   5   5   8  348.51   21.34
  -5  -5  -8  396.25   23.13
  -5  -5  -9 1279.26   31.18
   5   5   9 1230.54   41.26
  -5  -5  -9 1254.07   42.17
  -5  -5 -10  553.82   20.46
   5   5  10  588.95   29.55
  -5  -5 -10  544.18   28.12
  -5  -5 -11   54.34    6.94
   5   5  11   56.95   11.06
  -5  -5 -11   75.32   12.00
   5   5  12   32.03    9.96
  -5  -5 -12   27.61    5.66
  -5  -5 -12   29.29    9.86
   5   5  13   20.06    8.35
  -5  -5 -13   15.51    7.88
  -5  -5 -13   21.48    4.97
   5   5  14   10.28    6.94
   5   5  14    2.78    9.00
  -5  -5 -14    5.11    6.52
  -5  -5 -14    6.31    4.08
   5   5  15   14.57    9.55
  -5  -5 -15   13.46    8.33
   5   5  15   14.80    6.98
  -5  -5 -16    7.64    8.89
   5   5  16    7.03    6.77
  -5  -5 -17    1.54    7.82
   5   5  17    2.06    5.49
  -5  -5 -18   -1.35    7.71
   5   5  18    0.52    7.06
   5   5  19    6.27    6.48
   5   5  20   11.05    7.61
  -5  -6  14    3.79    9.45
   5   6 -14    5.59    7.22
  -5  -6  13   15.99   10.94
  -5  -6  13   -5.78    5.02
   5   6 -13    8.79    7.33
  -5  -6  12    4.20    5.04
   5   6 -12    9.16    7.38
  -5  -6  11    6.78    9.09
  -5  -6  11   12.80    5.04
   5   6 -11    9.92    7.54
  -5  -6  10   17.15    8.95
  -5  -6  10   18.08    5.16
   5   6 -10   35.58    8.44
  -5  -6   9   15.16    9.86
   5   6  -9   -0.06    5.48
  -5  -6   9   12.77    4.88
  -5  -6   8   20.03    9.13
   5   6  -8   25.28    8.20
  -5  -6   8   30.72    5.74
  -5  -6   7   24.72   10.80
  -5  -6   7   17.35    4.84
   5   6  -7   11.25    6.28
  -5  -6   6    6.02    7.09
   5   6  -6    7.80    5.45
  -5  -6   6    4.94    3.63
  -5  -6   5   -0.82    3.06
  -5  -6   5    5.68    8.02
   5   6  -5    8.92    5.27
  -5  -6   4    7.09    3.21
  -5  -6   4   21.51    8.69
   5   6  -4   11.27    5.75
  -5  -6   3    1.42    6.99
   5   6  -3   -5.02    4.96
  -5  -6   2   14.50    7.52
   5   6  -2    5.94    5.40
   5   6  -1   31.93    7.19
  -5  -6   1   41.23    9.24
  -5  -6   0   62.62   10.11
   5   6   0   51.73    8.49
   5   6   1   16.97    5.79
  -5  -6  -1    7.09    5.94
   5   6   2    6.26    5.18
  -5  -6  -2    5.71    4.90
   5   6   3   23.98    7.00
  -5  -6  -3   29.39    8.36
   5   6   4   13.61    6.12
  -5  -6  -4   11.78    6.10
  -5  -6  -5  584.18   24.57
   5   6   5  580.62   26.32
  -5  -6  -6  231.53   15.84
   5   6   6  247.68   17.33
  -5  -6  -7  490.31   21.84
   5   6   7  458.23   24.75
  -5  -6  -8    6.17    6.48
  -5  -6  -8    5.88    4.31
   5   6   8   -0.04    6.92
  -5  -6  -9   34.96    9.57
  -5  -6  -9   34.30    6.96
   5   6   9   35.87    9.70
  -5  -6 -10   15.25    8.47
   5   6  10    9.69    7.13
  -5  -6 -10   13.97    5.50
   5   6  11   60.98   12.24
  -5  -6 -11   63.24    8.39
  -5  -6 -11   54.47   11.94
  -5  -6 -12    0.83    4.13
  -5  -6 -12   -0.49    7.62
   5   6  13   14.51    9.59
  -5  -6 -13    3.88    5.14
  -5  -6 -13    4.48    7.84
  -5  -6 -14    4.42    8.72
   5   6  14    5.30   10.32
  -5  -6 -15   54.47   11.76
   5   6  15   60.75   14.42
  -5  -6 -16   -3.63    8.28
   5   6  16   32.20   13.41
  -5  -6 -17   -2.54    7.71
   5   6  17    5.51   11.36
   5   6  18   -3.50    6.71
  -5  -6 -18    1.36    8.17
   5   6  18   -7.21   12.80
   5   6  19   -2.35    6.73
  -5  -6 -19   -0.08    8.58
   5   6  20   -4.51    7.03
  -5  -6 -20    1.22    9.50
   5   6  20   17.56   15.66
  -5  -7  12  -22.46   12.33
   5   7 -12   12.60    7.39
  -5  -7  11   16.57   11.41
   5   7 -11    0.20    6.26
  -5  -7  10   -3.61    8.74
   5   7 -10    1.99    6.52
  -5  -7   9    7.68    8.56
   5   7  -9   11.24    7.93
  -5  -7   8   19.36    9.60
   5   7  -8    6.08    6.22
  -5  -7   7  -17.80   11.47
   5   7  -7    8.32    6.08
  -5  -7   6   23.62   10.86
   5   7  -6   10.80    6.44
  -5  -7   5    4.54    8.06
   5   7  -5    2.07    6.18
   5   7  -4   -0.72    5.26
  -5  -7   3    3.68    8.00
   5   7  -3   -5.54    6.56
  -5  -7   2   -2.13    7.23
   5   7  -2   -2.38    5.79
   5   7  -1   -1.03    5.76
  -5  -7   1    5.03    6.81
   5   7   0   38.48    8.58
  -5  -7   0   34.30    9.78
   5   7   1    7.50    5.94
  -5  -7  -1    3.24    7.87
   5   7   2   10.72    7.74
  -5  -7  -2   -1.27    7.84
   5   7   3  419.62   23.60
  -5  -7  -3  430.03   24.59
   5   7   4   53.09    9.49
  -5  -7  -4   50.33   10.42
   5   7   5  225.61   18.22
  -5  -7  -5  245.13   18.32
   5   7   6  -14.74    7.97
  -5  -7  -6    0.70    6.00
   5   7   7   65.78   11.31
  -5  -7  -7   77.13   10.40
   5   7   8   43.28   10.57
  -5  -7  -8   29.69    8.19
   5   7   9    9.89    8.43
  -5  -7  -9   -3.24    5.44
   5   7  10   29.50   11.07
  -5  -7 -10   25.55    7.38
  -5  -7 -10   31.66    9.82
  -5  -7 -11    6.90    6.58
  -5  -7 -11   18.84    8.72
   5   7  12   12.87    9.85
  -5  -7 -12    2.37    5.45
  -5  -7 -12   -0.81    7.29
  -5  -7 -13   40.48   11.27
  -5  -7 -13   39.01    8.16
   5   7  13   52.08   12.18
  -5  -7 -14   -7.08    8.20
   5   7  14   21.52   11.39
  -5  -7 -15   10.02    9.13
   5   7  15   14.22   11.75
  -5  -7 -16   -0.58    9.20
   5   7  16   -5.40   10.28
  -5  -7 -17   14.77   11.00
   5   7  17   14.92   12.49
  -5  -7 -18    3.62   10.59
   5   7  18   15.94   13.83
  -5  -8  10    2.65    9.94
   5   8 -10   -5.89    7.32
  -5  -8   9    6.31   10.90
   5   8  -9    5.12    6.90
  -5  -8   8   -8.84   10.77
   5   8  -8   -1.79    6.53
  -5  -8   7   12.33    9.76
   5   8  -7   19.96    8.38
  -5  -8   6   11.45   10.28
   5   8  -6   -6.35    7.24
   5   8  -5   -1.08    6.10
  -5  -8   4   -6.84    9.00
   5   8  -4    7.55    6.98
  -5  -8   3   11.34    8.63
   5   8  -3   -2.43    6.51
  -5  -8   2    7.23    7.97
   5   8  -2   14.22    6.43
   5   8  -1   11.30    7.70
  -5  -8   1    6.17    9.49
  -5  -8   0   59.63   12.77
   5   8   0   53.41   10.52
   5   8   1  224.94   18.58
  -5  -8  -1  211.56   20.39
   5   8   2   21.81    7.82
  -5  -8  -2   17.24    8.06
   5   8   3  177.06   16.62
  -5  -8  -3  162.00   17.27
   5   8   4    1.89    7.66
  -5  -8  -4    2.59    8.14
   5   8   5   44.65    9.95
  -5  -8  -5    8.74    6.74
   5   8   6   15.71    9.98
  -5  -8  -6   10.05    6.53
   5   8   7    7.12    7.45
  -5  -8  -7   11.69    7.58
   5   8   8    2.43    7.05
  -5  -8  -8    0.46    7.19
   5   8   9   -8.61    9.96
  -5  -8  -9    0.72    6.29
   5   8  10  -16.31   10.40
  -5  -8 -10    7.66    7.28
   5   8  11   50.20   13.63
  -5  -8 -11   43.51   10.08
  -5  -8 -12   15.19    7.25
   5   8  12   12.48   10.08
  -5  -8 -13   -2.74    8.00
   5   8  13   29.58   13.96
  -5  -8 -14    0.78    7.71
   5   8  14   28.01   12.44
   5   8  15   37.79   14.22
  -5  -8 -15   22.28    9.93
   5   8  16   22.43   12.17
  -5  -8 -16   11.72    9.36
   5   8  17  143.21   22.07
  -5  -8 -17   66.18   14.76
  -5  -9   7    9.35   10.50
   5   9  -7   20.21    8.56
  -5  -9   6    2.52   10.39
   5   9  -6    4.10    6.49
  -5  -9   5   15.52   11.13
   5   9  -5  -12.37    7.71
  -5  -9   4    3.26   10.77
   5   9  -4   14.24    7.81
  -5  -9   3    0.19    9.95
   5   9  -3   13.60    7.36
  -5  -9   2   92.30   16.14
   5   9  -2   89.69   13.72
   5   9  -1   51.26   11.17
  -5  -9   1   44.70   12.41
   5   9   0   14.46    7.90
  -5  -9   0    7.10    9.56
  -5  -9  -1  263.17   24.14
   5   9   1  321.61   23.38
   5   9   2    3.59    6.66
  -5  -9  -2   15.05    9.98
  -5  -9  -3   99.51   16.15
   5   9   3  104.08   14.24
   5   9   4    4.94    7.67
  -5  -9  -4   15.37   10.10
   5   9   5    1.62    7.87
  -5  -9  -5    3.50    7.50
   5   9   6   -8.78    8.47
  -5  -9  -6   -1.39    7.47
   5   9   7   15.64    8.70
  -5  -9  -7    7.65    7.81
   5   9   8   13.94    9.04
  -5  -9  -8   -9.10    7.50
   5   9   9   16.65    9.54
  -5  -9  -9   16.26    8.82
   5   9  10   23.50   10.90
  -5  -9 -10   12.49    7.97
   5   9  11   -6.91   10.01
  -5  -9 -11   13.43    7.36
   5   9  12   16.80   11.36
   5   9  13   26.89   11.71
   5   9  14   15.58   12.10
   5   9  15  165.90   23.05
   5  10  -2  -10.60    7.62
  -5 -10   2  -13.72   10.55
   5  10  -1  157.10   17.89
  -5 -10   1  175.34   22.87
  -5 -10   0   27.52   13.01
   5  10   0   25.83    9.58
  -5 -10  -1  -11.92   10.35
   5  10   1    9.26    7.68
  -5 -10  -2   21.21   10.33
   5  10   2   40.90   10.88
  -5 -10  -3   13.48   12.01
   5  10   3   23.42    9.65
  -5 -10  -4   -4.82    8.90
   5  10   4   11.14    8.03
  -5 -10  -5   -6.21    9.20
   5  10   5   -6.57    8.20
  -5 -10  -6   -3.72    8.47
   5  10   6   32.02   11.24
  -5 -10  -7   -8.16   10.37
   5  10   7    0.15    8.97
  -5 -10  -8   -0.63    7.91
   5  10   8   14.55   11.40
  -5 -10  -9   15.72    9.81
   5  10   9   -0.96    9.18
   5  10  10   19.14   10.17
   5  10  11   12.82   10.40
  -6   9  10    1.44    5.19
  -6   9  10   -8.06    9.05
  -6   9   9   21.17    6.35
  -6   9   9   13.75    8.23
  -6   9   8   35.33    7.53
  -6   9   8   14.98    7.61
  -6   9   7    2.99    4.63
  -6   9   7   12.56    8.67
  -6   9   6   16.63    6.37
  -6   9   6    3.84    6.61
  -6   9   5   10.31    5.52
  -6   9   4   -0.52    6.08
  -6   9   3  -14.71    5.70
  -6   8  13    7.14    9.27
  -6   8  13   17.97    6.98
  -6   8  12   -6.02    8.71
  -6   8  11   -3.64    4.23
  -6   8  11   16.59    9.32
  -6   8  10   -0.46    3.58
  -6   8  10    9.19    7.79
  -6   8   9   23.90    9.94
  -6   8   9   30.89    6.87
  -6   8   8   32.74    7.07
  -6   8   8   36.75    8.92
  -6   8   7   27.06    7.03
  -6   8   7   13.56    6.30
  -6   8   6    5.02    5.30
  -6   8   6    8.19    6.16
  -6   8   5   11.75    5.47
  -6   8   5   10.03    6.47
  -6   8   4   34.72    8.14
  -6   8   4   40.65    8.13
  -6   8   3   22.46    7.86
  -6   8   3   10.75    5.75
  -6   8   2   13.69    6.07
  -6   8   2   33.76    7.75
  -6   8   1   -7.79    6.02
  -6   8   0   23.05    6.96
  -6   8  -1    4.79    5.36
  -6   7  15   42.27   12.47
  -6   7  15   41.54    9.42
  -6   7  14   55.57   14.37
  -6   7  14   37.24    8.95
  -6   7  13   28.86   10.39
  -6   7  12    4.32    9.60
  -6   7  12    2.85    4.58
  -6   7  11   -2.92    8.47
  -6   7  11    6.03    4.51
  -6   7  10    9.64    8.03
  -6   7  10    4.91    3.88
  -6   7   9   -9.38    7.49
  -6   7   9   -0.11    3.53
  -6   7   8    6.87    6.95
  -6   7   8    2.21    4.05
  -6   7   7    7.63    6.73
  -6   7   7    5.54    4.45
  -6   7   6   20.99    7.17
  -6   7   6   25.48    6.07
  -6   7   5    4.44    5.82
  -6   7   5    3.57    4.18
  -6   7   4   15.71    6.25
  -6   7   4    9.03    4.94
  -6   7   3    1.37    4.43
  -6   7   3   14.27    5.73
  -6   7   2   16.71    5.45
  -6   7   2   20.90    6.18
  -6   7   1   15.49    6.90
  -6   7   1    3.95    4.86
  -6   7   0   72.29    8.88
  -6   7   0   90.40   10.93
  -6   7  -1   26.08    6.08
  -6   7  -2    4.08    5.09
  -6   7  -3    6.19    3.94
  -6   7  -4    6.09    4.28
  -6   7  -5    1.98    4.00
   6  -7   6    0.14    4.91
   6  -7   7    3.00    5.22
   6  -7   8    5.91    5.89
   6  -7   9    5.22    6.07
   6  -7  10    5.99    7.11
   6  -7  11    4.86    7.40
  -6   6  16   -2.40    5.56
  -6   6  15    9.46    7.07
  -6   6  14    2.61    9.29
  -6   6  14   11.92    6.50
  -6   6  13    1.19    3.86
  -6   6  13   22.22   12.01
  -6   6  12   25.89    5.72
  -6   6  12   14.75    9.89
  -6   6  11   41.78    6.78
  -6   6  11   79.23   13.88
  -6   6  10   -4.19    3.91
  -6   6  10   -7.86    7.23
  -6   6   9   22.39    5.50
  -6   6   9   19.06    7.81
  -6   6   8    9.69    4.35
  -6   6   8   19.92    9.24
  -6   6   7   38.68    6.58
  -6   6   7   39.12    9.27
  -6   6   6  100.95    9.84
  -6   6   6  106.42   12.13
  -6   6   5   14.58    5.06
  -6   6   5   12.45    5.70
  -6   6   4   15.20    5.19
  -6   6   4   12.51    5.23
  -6   6   3    1.72    3.87
  -6   6   3   -1.16    4.48
  -6   6   2  113.38   10.58
  -6   6   2  116.84   10.11
  -6   6   1   18.54    5.25
  -6   6   1   10.36    4.11
  -6   6   0   74.30    7.86
  -6   6   0   70.01    8.73
   6  -6   1   13.62    3.76
  -6   6  -1    0.81    3.76
  -6   6  -1   10.76    6.00
   6  -6   2    3.03    3.09
  -6   6  -2    4.88    3.97
  -6   6  -2   -4.65    4.44
   6  -6   3   -1.08    3.71
  -6   6  -3    6.42    3.79
   6  -6   4   -0.01    3.88
  -6   6  -4   -0.17    3.39
   6  -6   5    2.85    5.50
  -6   6  -5   11.68    5.19
   6  -6   6    3.00    4.90
  -6   6  -6    4.06    3.81
   6  -6   7    5.41    5.62
  -6   6  -7   13.76    5.42
   6  -6   8    6.83    6.16
  -6   6  -8    4.55    4.40
   6  -6   9    1.27    5.12
   6  -6  10    4.13    6.48
   6  -6  11   13.07    7.72
   6  -6  12   33.44    8.52
   6  -6  13   10.21    8.59
  -6   5  17    6.59    5.71
  -6   5  16   23.49    8.07
  -6   5  15    1.48    6.07
  -6   5  14    0.40    5.62
  -6   5  13    4.18    4.09
  -6   5  12   -3.33    3.68
  -6   5  11   80.79    8.73
  -6   5  10  332.13   23.86
  -6   5  10  258.58   14.61
  -6   5   9   23.43    8.14
  -6   5   9   32.13    6.38
  -6   5   8   21.63    8.08
  -6   5   8   15.74    4.60
  -6   5   7   11.55    5.47
  -6   5   7    9.39    4.22
  -6   5   6    8.55    4.72
  -6   5   6    9.01    5.54
  -6   5   5    7.13    4.11
  -6   5   5    8.43    5.02
  -6   5   4  156.39   11.84
  -6   5   4  175.75   11.81
  -6   5   3  108.06    9.62
  -6   5   2  228.29   14.27
  -6   5   2  229.88   12.12
  -6   5   1    3.93    3.49
  -6   5   1    5.78    4.37
  -6   5   1    5.15    3.59
  -6   5   0  276.38   15.70
  -6   5   0  267.39   11.88
   6  -5   1    6.86    3.39
  -6   5  -1   12.54    4.75
  -6   5  -1    9.92    3.50
   6  -5   2   73.23    7.06
  -6   5  -2   74.81    6.53
  -6   5  -2   59.90    8.39
   6  -5   3    2.49    3.54
  -6   5  -3    3.86    4.10
  -6   5  -4   35.36    7.38
   6  -5   4   47.44    6.47
   6  -5   5   -6.44    5.35
  -6   5  -5   -4.34    3.28
  -6   5  -5    2.72    4.00
   6  -5   6    3.40    4.42
  -6   5  -6    7.99    3.62
  -6   5  -6    0.31    4.60
  -6   5  -7    0.93    3.78
   6  -5   7   10.41    5.96
  -6   5  -8   -0.11    3.84
   6  -5   8   -2.31    4.57
  -6   5  -9   -0.92    3.91
   6  -5   9    9.94    5.43
  -6   5 -10    1.53    4.44
   6  -5  10   16.80    7.00
  -6   5 -11    5.84    5.31
   6  -5  11   -1.35    5.83
   6  -5  12   32.04    8.31
   6  -5  13   14.29    7.52
  -6   5 -14   -0.59    5.39
   6  -5  14   12.45    7.99
  -6   5 -15    1.14    5.36
   6  -5  15   -3.72    6.60
  -6   4  18    1.85    6.36
  -6   4  17    0.69    5.90
  -6   4  16   64.86   11.76
  -6   4  15    6.12    7.40
  -6   4  14   16.69    6.05
  -6   4  13    8.35    4.59
  -6   4  12   35.61    5.95
  -6   4  11    0.70    3.81
  -6   4  10    2.80    4.43
  -6   4   9   10.70    4.38
  -6   4   8   26.41    8.08
  -6   4   8    6.60    3.58
  -6   4   7    4.67    6.17
  -6   4   7   -1.11    3.23
  -6   4   6   -2.74    3.38
  -6   4   5    7.03    4.98
  -6   4   5    4.50    4.44
  -6   4   4    1.50    3.30
  -6   4   4    2.53    3.80
  -6   4   3   35.24    6.00
  -6   4   3   42.23    5.58
  -6   4   2   54.32    6.95
  -6   4   2   58.75    5.65
  -6   4   1    2.23    3.89
  -6   4   1    5.13    3.85
  -6   4   1    3.26    2.75
  -6   4   0   35.02    6.15
  -6   4   0   44.62    4.28
  -6   4   0   46.65    6.77
   6  -4   1    3.58    3.01
  -6   4  -1    3.62    3.96
  -6   4  -1    2.45    2.18
  -6   4  -2  686.97   23.59
   6  -4   2  698.94   19.88
  -6   4  -2  634.66   14.44
  -6   4  -3    9.15    2.84
   6  -4   3    9.11    4.49
  -6   4  -4   -2.02    3.48
  -6   4  -4    1.75    2.40
   6  -4   4    3.13    3.64
  -6   4  -5   16.77    5.22
  -6   4  -5   25.58    4.07
   6  -4   5   24.09    5.59
  -6   4  -6   24.23    4.74
  -6   4  -6   30.03    6.61
   6  -4   6   28.26    6.22
  -6   4  -7   28.05    6.27
   6  -4   7   21.67    6.88
  -6   4  -8  116.23   11.25
   6  -4   8  109.41   11.60
  -6   4  -8  100.78    8.74
   6  -4   9    3.45    4.76
  -6   4  -9   -2.30    4.09
  -6   4  -9   -5.83    4.05
  -6   4 -10  118.05   11.21
   6  -4  10  105.04   12.05
  -6   4 -10   82.89    9.12
   6  -4  11    7.94    6.15
  -6   4 -11   -0.10    4.82
  -6   4 -11    5.14    4.27
   6  -4  12   10.49    7.53
  -6   4 -12    6.26    5.81
  -6   4 -12   10.28    5.98
   6  -4  13    0.53    5.51
  -6   4 -13    4.53    6.15
  -6   4 -13    6.72    4.69
  -6   4 -14    6.24    5.17
   6  -4  14   11.83    7.06
  -6   4 -15   -3.14    4.58
   6  -4  15    7.09    9.19
  -6   4 -16    0.15    4.89
   6  -4  16    1.87    7.31
  -6   3  18   19.05    8.02
  -6   3  17   28.02    9.00
  -6   3  16   -1.12    5.95
  -6   3  15   -1.20    4.31
  -6   3  15    7.24    6.06
  -6   3  14   24.75    6.14
  -6   3  14   37.22    7.97
  -6   3  13   43.24    7.13
  -6   3  12  120.25   10.69
  -6   3  11    1.15    3.93
  -6   3  10   13.65    4.44
  -6   3   9    0.89    3.46
  -6   3   8    7.86    3.77
  -6   3   7    0.34    3.24
  -6   3   6   52.68    7.01
  -6   3   5    3.73    2.49
  -6   3   5    5.46    3.09
  -6   3   5    4.94    4.30
  -6   3   5    4.46    3.81
  -6   3   4    3.91    2.70
  -6   3   4    5.65    2.52
  -6   3   4    5.76    3.56
  -6   3   4   12.12    4.19
  -6   3   3   -0.43    2.41
  -6   3   3    8.10    3.12
  -6   3   3    5.66    4.17
  -6   3   3    4.04    2.40
  -6   3   2    1.10    2.55
  -6   3   2   -0.87    2.27
  -6   3   2    3.39    3.39
  -6   3   2    1.24    2.26
  -6   3   1    2.65    3.63
  -6   3   1    3.88    3.10
  -6   3   1   -1.18    2.96
  -6   3   1    0.54    1.86
  -6   3   0   83.59    8.26
  -6   3   0   67.09    3.28
  -6   3   0   71.26    7.83
  -6   3  -1   -2.34    3.60
  -6   3  -1    2.94    1.29
   6  -3   2   16.58    4.25
  -6   3  -2   25.13    2.46
   6  -3   3    1.32    3.23
  -6   3  -3    2.96    3.30
  -6   3  -3    6.31    1.92
  -6   3  -4  412.79   17.76
   6  -3   4  426.18   17.42
  -6   3  -4  387.16   10.46
   6  -3   5   17.35    4.56
   6  -3   5   15.51    5.15
  -6   3  -5   14.03    5.04
  -6   3  -5   17.59    3.31
  -6   3  -6   44.15    6.51
   6  -3   6   41.56    7.02
  -6   3  -6   39.96    4.82
   6  -3   7    2.70    4.08
  -6   3  -7   -6.27    4.26
  -6   3  -7    2.74    3.12
   6  -3   8   34.35    7.07
  -6   3  -8   51.85    7.59
  -6   3  -8   46.81    6.38
  -6   3  -9   13.44    5.01
   6  -3   9   20.71    6.64
  -6   3  -9   24.86    5.57
  -6   3 -10    1.11    3.63
   6  -3  10    0.81    5.38
  -6   3 -10   -2.49    5.06
  -6   3 -11    5.04    3.59
   6  -3  11   -0.06    5.21
  -6   3 -11    7.31    4.47
   6  -3  12   33.56    7.57
  -6   3 -12   37.30    6.90
  -6   3 -13    4.33    4.57
   6  -3  13    0.35    6.18
  -6   3 -14    3.12    4.54
   6  -3  14   -0.74    5.75
  -6   3 -15   -2.47    4.81
   6  -3  15   16.40    8.98
  -6   3 -16   -1.42    4.45
   6  -3  16    0.50    7.39
  -6   3 -17   -0.07    4.63
   6  -3  17    5.12    7.38
  -6   2  15    1.61    5.07
  -6   2  15   -3.74    5.67
  -6   2  14   13.23    5.45
  -6   2  14    3.10    5.11
  -6   2  13   -0.50    4.03
  -6   2  12   -0.02    3.99
  -6   2  11    5.64    4.48
  -6   2  10  205.64   13.88
  -6   2   9   36.04    5.95
  -6   2   8    0.86    4.11
  -6   2   7    5.70    3.89
  -6   2   6   14.29    3.64
  -6   2   6   12.18    4.37
  -6   2   5    1.54    2.66
  -6   2   5    3.88    2.80
  -6   2   5    4.18    3.25
  -6   2   4    4.98    2.93
  -6   2   4    4.44    3.29
  -6   2   4   10.56    2.41
  -6   2   3    7.57    3.31
  -6   2   3    9.40    2.82
  -6   2   3   11.26    2.08
  -6   2   3   10.35    3.66
  -6   2   2   16.68    2.00
  -6   2   2   20.35    4.14
  -6   2   2   12.29    1.45
  -6   2   1    3.20    3.17
  -6   2   0   32.91    6.04
  -6   2  -1    9.72    4.65
  -6   2  -1    1.43    4.20
  -6   2  -2  130.09   10.64
  -6   2  -2  163.57   10.86
  -6   2  -3    7.97    3.95
  -6   2  -3   -0.48    4.29
   6  -2   3   -3.76    3.13
  -6   2  -4   53.58    6.92
   6  -2   4   54.91    7.00
   6  -2   5    3.21    3.66
  -6   2  -5    4.97    3.55
   6  -2   5    7.00    2.85
  -6   2  -6  145.66   10.87
   6  -2   6  162.77    7.78
   6  -2   6  162.09   11.92
   6  -2   7    1.90    4.28
   6  -2   7    7.94    3.38
  -6   2  -7    6.55    4.20
  -6   2  -8    8.36    3.75
   6  -2   8    4.63    4.39
  -6   2  -9    0.69    3.85
   6  -2   9   10.70    6.16
  -6   2 -10   -0.11    3.38
   6  -2  10    2.63    4.63
  -6   2 -11   -4.12    3.57
   6  -2  11   -4.96    5.13
  -6   2 -12    2.65    3.76
   6  -2  12   -2.87    5.05
  -6   2 -13    1.40    4.07
   6  -2  13    4.88    6.36
  -6   2 -14    1.42    3.88
   6  -2  14    2.61    5.94
  -6   2 -15    2.96    4.43
   6  -2  15    2.99    5.76
  -6   2 -16    6.13    4.10
   6  -2  16    4.88    6.32
  -6   2 -17    7.40    4.68
   6  -2  17   14.83    7.78
  -6   2 -18   -5.73    4.54
   6  -2  18  -10.50    8.77
  -6   1  18    9.13    6.54
  -6   1  17   -0.98    5.86
  -6   1  16   18.90    7.72
  -6   1  16   15.65    6.96
  -6   1  15   -4.25    4.92
  -6   1  15    5.51    5.90
  -6   1  14   -1.88    5.34
  -6   1  14   14.24    7.55
  -6   1  13    8.53    5.25
  -6   1  12   99.01   10.85
  -6   1  11   36.21    7.25
  -6   1  10  242.77   14.77
  -6   1   9    3.33    3.79
  -6   1   8   98.30    9.55
  -6   1   7    9.91    4.99
  -6   1   6    1.31    3.54
  -6   1   6    2.39    2.98
  -6   1   5    3.97    4.52
  -6   1   5    0.66    2.32
  -6   1   4   12.99    4.73
  -6   1   4    8.43    2.40
  -6   1   3   11.50    2.06
  -6   1   3    8.11    3.84
  -6   1   2   31.29    5.51
  -6   1   1    8.50    3.47
  -6   1   0   -7.45    3.86
  -6   1   0   -1.53    3.31
  -6   1  -1    4.10    4.50
  -6   1  -2  172.13   12.92
  -6   1  -2  157.02   10.50
   6  -1   3    6.85    3.09
  -6   1  -3    2.73    3.04
  -6   1  -4  153.97   10.65
   6  -1   4  151.26   10.57
  -6   1  -4  120.70   12.19
   6  -1   5   23.15    5.26
  -6   1  -5   12.45    4.27
   6  -1   6    7.75    4.74
   6  -1   6    8.81    2.19
  -6   1  -6    5.19    2.87
   6  -1   7    3.22    4.05
  -6   1  -7   -0.47    3.02
   6  -1   7   -2.68    2.30
  -6   1  -8   59.73    7.03
   6  -1   8   60.05    5.50
   6  -1   8   52.50    7.92
  -6   1  -9    4.22    3.21
   6  -1   9    1.67    4.64
  -6   1 -10   12.42    4.23
   6  -1  10    3.06    4.82
  -6   1 -11    3.74    3.28
   6  -1  11    1.16    5.13
  -6   1 -12    8.34    3.69
   6  -1  12   -0.88    5.24
  -6   1 -13   -3.20    3.74
   6  -1  13    8.52    6.22
  -6   1 -14   18.17    4.96
   6  -1  14    3.32    6.47
  -6   1 -15    4.12    4.46
   6  -1  15   -1.08    5.77
  -6   1 -16    4.47    4.44
   6  -1  16    9.90    8.74
  -6   1 -17    3.13    3.40
   6  -1  17   -2.59    8.31
   6  -1  18    3.78    7.36
   6  -1  19   -6.06    7.97
  -6   0  18   -1.59    6.01
  -6   0  17   19.56    8.06
  -6   0  16   13.74    6.86
  -6   0  16   19.89    7.02
  -6   0  15    9.52    5.35
  -6   0  15   14.49    6.91
  -6   0  14  146.11   14.02
  -6   0  14  101.15   11.26
  -6   0  13    2.82    4.67
  -6   0  13   -1.52    5.00
  -6   0  12   55.71    8.58
  -6   0  11   -2.01    4.18
  -6   0  10  221.21   14.89
  -6   0   9    3.97    4.65
  -6   0   8   60.46    7.57
  -6   0   7   12.89    4.40
  -6   0   6  127.79   10.92
  -6   0   6   93.95    7.72
  -6   0   5    1.56    4.28
  -6   0   5    6.78    3.46
  -6   0   4   48.90    6.77
  -6   0   4   44.19    4.54
  -6   0   3    0.72    2.09
  -6   0   3   15.20    4.93
  -6   0   2    2.53    1.78
  -6   0   2    4.15    4.21
  -6   0   1   -5.60    3.92
  -6   0  -1   44.22    7.42
  -6   0  -1   59.62    6.97
  -6   0  -2  664.78   26.11
  -6   0  -2  707.04   21.84
  -6   0  -3   19.27    6.76
  -6   0  -3    9.81    4.56
  -6   0  -4   71.65    9.74
  -6   0  -4  103.85    8.59
   6   0   5   25.01    5.46
  -6   0  -5   29.83    5.45
  -6   0  -5   19.81    6.04
   6   0   6   35.50    6.32
   6   0   6   18.55    2.33
   6   0   6   30.34    3.74
  -6   0  -6   22.05    4.66
  -6   0  -6   10.10    5.10
   6   0   7    6.72    4.68
  -6   0  -7    2.61    3.71
   6   0   7    0.74    2.09
   6   0   8   54.35    4.47
  -6   0  -8   48.31    6.20
  -6   0  -9   31.16    5.87
   6   0   9   27.09    4.46
   6   0   9   35.54    7.46
   6   0  10   14.66    6.09
  -6   0 -10   17.43    4.48
   6   0  11   19.40    6.57
  -6   0 -11   28.47    5.18
   6   0  12    8.01    6.91
  -6   0 -12    5.32    3.35
   6   0  13   10.68    5.92
  -6   0 -13    6.80    4.08
   6   0  14    3.68    6.25
  -6   0 -14    3.42    3.26
   6   0  15    7.05    6.23
  -6   0 -15   -2.63    3.73
   6   0  16    2.38    5.91
  -6   0 -16   14.54    4.78
   6   0  17   -5.42    7.47
  -6   0 -17    0.27    4.34
   6   0  18   18.89   10.30
   6   0  19   24.26    8.66
  -6  -1  18   61.53   11.56
  -6  -1  17    6.54    7.63
  -6  -1  17    8.48    8.06
  -6  -1  16  -11.50    9.00
  -6  -1  16    2.76    5.37
  -6  -1  15   -8.22    6.31
  -6  -1  15    1.97    5.69
  -6  -1  14    0.50    5.68
  -6  -1  14   12.14    8.13
  -6  -1  13   -2.08    5.56
  -6  -1  13    3.39    5.61
  -6  -1  12    0.88    5.42
  -6  -1  12   15.19    6.22
   6   1 -11    6.25    5.68
  -6  -1  11    2.53    4.94
  -6  -1  10   84.01   10.40
   6   1 -10   95.33   11.13
   6   1  -9   -2.92    5.62
  -6  -1   9    1.33    4.24
  -6  -1   8  706.16   25.94
   6   1  -8  690.76   25.17
  -6  -1   7    3.19    4.40
   6   1  -7   10.13    4.91
  -6  -1   6   23.33    5.88
   6   1  -6   27.41    5.03
  -6  -1   5    5.97    5.01
  -6  -1   5   -3.34    3.59
   6   1  -5   -2.24    3.57
  -6  -1   4  164.00    9.49
  -6  -1   4  181.01   12.79
   6   1  -4  168.27    9.61
  -6  -1   3   -2.71    4.06
  -6  -1   3    0.13    2.76
   6   1  -3    2.19    3.05
  -6  -1   2  145.02   11.32
  -6  -1   2  132.64    7.46
   6   1  -2  126.10    6.91
  -6  -1   1   34.74    6.30
  -6  -1   1   32.90    3.91
   6   1  -1   26.08    3.01
  -6  -1   0  574.43   20.87
   6   1   0  519.29    9.59
  -6  -1  -1   -0.37    4.35
  -6  -1  -1   -6.33    5.14
  -6  -1  -2   19.14    6.91
  -6  -1  -2   23.00    5.74
  -6  -1  -3    1.60    5.06
  -6  -1  -3    1.71    3.70
   6   1   4   86.37    3.13
  -6  -1  -4  104.26    9.20
  -6  -1  -4  104.38   11.87
   6   1   5    3.40    1.75
  -6  -1  -5   -0.11    4.95
  -6  -1  -5   10.04    4.07
   6   1   5    3.25    2.24
  -6  -1  -6   60.41   10.19
   6   1   6   60.67    8.18
   6   1   6   53.86    4.05
  -6  -1  -6   58.97    6.85
   6   1   6   68.70    5.74
  -6  -1  -7    8.36    5.78
   6   1   7   17.31    4.26
  -6  -1  -7   22.35    4.77
   6   1   7   16.12    3.09
   6   1   7   22.50    5.52
  -6  -1  -8   11.02    4.56
   6   1   8   10.04    3.73
   6   1   8    8.08    4.52
  -6  -1  -9   22.39    5.11
   6   1   9   16.41    4.09
   6   1   9   12.96    5.66
   6   1  10   39.05    7.77
  -6  -1 -10   46.16    6.46
   6   1  11   31.08    7.17
  -6  -1 -11   32.76    5.64
   6   1  12   28.52    6.74
  -6  -1 -12   24.56    5.11
   6   1  13   94.32   12.40
  -6  -1 -13   92.43    8.29
  -6  -1 -14   18.98    4.87
   6   1  14    5.48    6.43
  -6  -1 -15   -0.11    3.47
   6   1  15    2.92    6.48
  -6  -1 -16    3.61    3.91
   6   1  16    6.28    6.90
   6   1  17    3.19    6.99
   6   1  20    1.19    6.85
  -6  -2  17    5.53    9.30
  -6  -2  17    2.44    5.54
  -6  -2  16    2.88    5.80
  -6  -2  16    4.24    7.77
   6   2 -16    9.84   10.34
  -6  -2  15   -7.67    6.03
  -6  -2  15    2.79    7.10
   6   2 -15   -0.65    7.66
  -6  -2  14   12.21    5.97
  -6  -2  14    5.94    6.42
   6   2 -14    5.27    7.14
  -6  -2  13    5.48    6.69
  -6  -2  13    2.55    5.81
   6   2 -13   12.61    7.96
  -6  -2  12    0.16    4.78
  -6  -2  12    3.27    5.51
   6   2 -12    3.75    5.81
  -6  -2  11    8.14    5.60
   6   2 -11    9.75    6.64
  -6  -2  11    5.78    6.41
   6   2 -10   29.08    7.05
  -6  -2  10   44.08    8.48
  -6  -2   9   37.38    8.61
   6   2  -9   26.11    6.45
   6   2  -8   15.75    5.78
  -6  -2   8   12.52    6.42
   6   2  -7    9.96    4.66
  -6  -2   7    2.85    4.77
  -6  -2   6  548.90   23.33
   6   2  -6  527.91   19.69
  -6  -2   5    9.84    4.95
   6   2  -5   -7.75    4.18
  -6  -2   4   14.58    5.13
   6   2  -4    6.17    3.47
  -6  -2   3   55.28    6.75
   6   2  -3   70.31    6.01
  -6  -2   3   66.20    8.40
  -6  -2   2  113.08    8.51
   6   2  -2   98.71    6.57
  -6  -2   2   97.36    9.76
  -6  -2   1   11.29    3.66
   6   2  -1   14.96    2.82
  -6  -2   0  155.66   12.20
  -6  -2   0  172.02    9.87
   6   2   0  155.04    7.36
  -6  -2  -1   33.57    6.51
   6   2   1   26.03    3.53
  -6  -2  -2  108.44    9.80
   6   2   2  109.88    6.05
  -6  -2  -2   92.01   11.90
   6   2   3   40.74    4.19
  -6  -2  -3   31.61    5.92
  -6  -2  -4   66.75    7.53
   6   2   4   71.61    5.49
  -6  -2  -4   65.14   10.90
  -6  -2  -5   -0.05    7.12
  -6  -2  -5    0.40    3.57
   6   2   5    2.63    2.73
  -6  -2  -6    9.72    7.32
   6   2   6   15.15    4.29
  -6  -2  -6   14.01    4.97
  -6  -2  -7  -11.95    7.19
   6   2   7    1.34    3.88
   6   2   7   -3.40    4.12
  -6  -2  -7   -6.80    3.95
  -6  -2  -8   20.76    7.02
   6   2   8   32.74    6.98
  -6  -2  -8   31.86    5.59
   6   2   8   21.12    5.20
   6   2   8   37.74    6.10
   6   2   9    4.92    4.99
   6   2   9   -1.31    5.09
  -6  -2  -9    2.81    6.79
  -6  -2  -9   -2.14    3.50
  -6  -2 -10   35.43    5.80
  -6  -2 -10   34.92    9.88
   6   2  10   38.73    7.66
  -6  -2 -11   21.25    4.76
   6   2  11   20.90    6.48
  -6  -2 -12   23.33    4.86
   6   2  12   23.03    7.51
  -6  -2 -13    2.92    3.55
   6   2  13    2.43    5.11
  -6  -2 -14   23.53    5.37
  -6  -2 -15    9.22    4.11
   6   2  16   16.77    7.47
  -6  -2 -16   18.72    4.56
   6   2  17    9.87    6.92
   6   2  18    0.49    8.04
   6   2  19   -2.97    7.08
   6   2  20   -1.87    7.83
  -6  -3  16   12.43    9.04
   6   3 -16   10.13    9.01
  -6  -3  16   15.09    6.62
  -6  -3  15   -7.19    9.67
  -6  -3  15    9.68    6.43
   6   3 -15   -6.26    8.24
  -6  -3  14    2.21    5.45
  -6  -3  14    5.32    9.07
   6   3 -14    9.57    7.47
  -6  -3  13   -2.21    5.00
  -6  -3  13   11.84    8.58
   6   3 -13   -6.14    7.87
  -6  -3  12   -3.37    5.54
   6   3 -12   -5.45    6.34
  -6  -3  12    2.81    6.75
   6   3 -11    7.46    6.25
  -6  -3  11   11.25    6.04
  -6  -3  11    6.68    5.95
   6   3 -10   -3.82    5.13
  -6  -3  10    6.50    4.46
  -6  -3  10   -1.82    5.89
  -6  -3   9    8.25    5.83
   6   3  -9    3.77    4.87
  -6  -3   8   15.92    7.72
   6   3  -8   13.07    4.91
  -6  -3   7   -7.38    6.36
   6   3  -7   -1.74    3.82
  -6  -3   6    3.99    5.29
   6   3  -6   12.79    4.93
  -6  -3   5   53.90    9.00
   6   3  -5   44.93    6.29
  -6  -3   4   35.55    7.96
   6   3  -4   37.92    5.70
  -6  -3   3    8.18    5.30
   6   3  -3   18.21    4.50
  -6  -3   2   19.97    5.96
   6   3  -2   15.05    3.93
  -6  -3   1   -3.66    4.71
   6   3  -1    1.98    3.39
  -6  -3   0   29.34    6.25
  -6  -3   0   29.83    5.94
   6   3   0   30.11    4.52
   6   3   1    9.61    3.75
  -6  -3  -1    4.70    5.35
  -6  -3  -1    7.61    4.46
  -6  -3  -2   59.10    7.92
   6   3   2   64.32    6.18
  -6  -3  -3   18.60    5.86
   6   3   3   16.52    4.26
  -6  -3  -4    4.02    5.47
  -6  -3  -4    4.13    4.52
   6   3   4    6.86    3.62
  -6  -3  -5   -8.66    6.02
  -6  -3  -5   -2.81    3.94
  -6  -3  -6   11.12    5.83
  -6  -3  -6   10.08    4.19
   6   3   6   11.57    4.22
  -6  -3  -7   16.06    6.65
   6   3   7   10.04    5.05
  -6  -3  -7    3.39    4.27
   6   3   8   21.46    6.10
  -6  -3  -8   21.38    5.33
  -6  -3  -8   17.91    8.32
   6   3   9    1.66    5.50
  -6  -3  -9    3.48    3.43
  -6  -3 -10    2.57    3.53
   6   3  10   11.88    6.87
  -6  -3 -11    3.64    3.38
   6   3  11    8.62    6.87
   6   3  11    2.53    5.47
   6   3  12   31.85    8.22
  -6  -3 -12   17.48    5.19
  -6  -3 -12   25.69    9.30
   6   3  13   11.31    5.69
  -6  -3 -13   12.38    4.37
  -6  -3 -13   -4.07    6.83
   6   3  14   17.49    7.13
  -6  -3 -14    5.90    3.94
   6   3  15   12.63    7.19
  -6  -3 -15    9.53    3.89
   6   3  16    0.61    6.33
   6   3  17    2.32    7.24
   6   3  18    3.98    6.51
   6   3  19   16.40    8.65
   6   3  20    2.13    8.83
  -6  -4  15    3.07    9.77
   6   4 -15    9.69    8.40
  -6  -4  15    1.28    5.46
  -6  -4  14   -0.04    8.52
   6   4 -14   10.46    8.60
  -6  -4  14   18.88    7.35
  -6  -4  13    3.00    8.41
   6   4 -13   11.07    7.78
  -6  -4  13   10.51    6.25
  -6  -4  12   12.42    8.27
   6   4 -12   10.09    7.44
  -6  -4  12    5.54    5.22
  -6  -4  11   30.58   10.47
   6   4 -11   15.02    7.05
  -6  -4  11   15.48    6.53
  -6  -4  10   -1.56    4.50
  -6  -4  10   -4.23    6.08
   6   4 -10   10.59    6.29
  -6  -4   9    1.36    4.64
   6   4  -9    6.45    5.44
  -6  -4   9    2.21    6.56
   6   4  -8   58.69    8.60
  -6  -4   8   57.20   10.76
   6   4  -7   33.72    6.54
  -6  -4   7   34.52    8.91
   6   4  -6   15.55    5.50
  -6  -4   6   23.34    7.97
   6   4  -5    4.70    4.25
  -6  -4   5    1.54    5.61
   6   4  -4   10.98    5.13
  -6  -4   4   15.63    7.29
   6   4  -3   -1.13    3.82
  -6  -4   3   -3.24    4.75
   6   4  -2   88.96    8.99
   6   4  -1   11.95    4.81
  -6  -4   1    3.48    5.00
  -6  -4   0  105.26   10.78
   6   4   0  104.63    8.99
  -6  -4  -1    0.20    5.48
   6   4   1   -3.30    3.83
  -6  -4  -2   22.82    6.50
   6   4   2   28.72    6.01
   6   4   3    0.14    3.87
  -6  -4  -3   -0.99    4.01
  -6  -4  -4   30.84    6.85
   6   4   4   28.45    5.84
  -6  -4  -5   10.30    6.97
  -6  -4  -5   18.14    5.60
   6   4   5    7.60    4.21
  -6  -4  -6   21.55    5.63
   6   4   6   26.10    5.99
  -6  -4  -7    2.64    4.40
   6   4   7   -0.19    5.50
  -6  -4  -8  161.22   12.08
  -6  -4  -8  138.74   15.19
   6   4   8  165.21   13.60
  -6  -4  -9  132.86   10.66
   6   4   9  136.91   13.11
  -6  -4  -9  137.07   15.65
   6   4  10    6.11    7.17
  -6  -4 -10    1.11    3.53
  -6  -4 -10   -1.38    6.44
   6   4  11   15.22    7.47
  -6  -4 -11   14.16    7.93
  -6  -4 -11    1.42    3.86
   6   4  12   -7.40    6.97
  -6  -4 -12   13.85    8.04
  -6  -4 -12    3.87    4.00
   6   4  12    5.07    5.73
  -6  -4 -13    2.80    7.30
  -6  -4 -13    2.96    3.39
   6   4  13   10.31    7.20
   6   4  14   11.11    7.73
  -6  -4 -14    4.21    8.14
  -6  -4 -14    1.19    3.64
   6   4  14   -4.99    6.06
  -6  -4 -15    7.81    7.59
  -6  -4 -15    7.52    3.75
   6   4  15    8.82    6.07
  -6  -4 -16    4.15    8.20
   6   4  16    5.48    5.34
  -6  -4 -17   30.49   11.83
   6   4  17   23.54    8.34
   6   4  18  -13.58    9.08
   6   4  19   60.84   12.69
   6   4  20   16.29    8.52
  -6  -5  14    1.02    5.34
   6   5 -14    1.53    8.86
  -6  -5  14   -3.61    9.32
  -6  -5  13    2.76    5.38
   6   5 -13    3.29    7.76
  -6  -5  13   -3.93    8.84
  -6  -5  12   -2.76    4.72
   6   5 -12  -12.52    6.93
  -6  -5  12   -1.75    8.21
  -6  -5  11    8.19    4.95
   6   5 -11    0.21    6.16
  -6  -5  11   14.34    8.83
   6   5 -10   -6.97    6.46
  -6  -5  10   -0.25    4.54
  -6  -5  10   -1.65    7.80
   6   5  -9   14.24    6.71
  -6  -5   9   23.46    8.77
  -6  -5   9   15.32    5.75
   6   5  -8   53.18    9.17
  -6  -5   8   30.19   10.89
  -6  -5   7   10.53    4.76
   6   5  -7   11.80    5.24
  -6  -5   7    7.14    7.88
   6   5  -6    2.94    4.90
  -6  -5   6   -1.49    6.45
   6   5  -5   -4.33    4.23
  -6  -5   5   -5.16    6.39
   6   5  -4   -3.41    4.12
  -6  -5   4   -5.71    7.95
   6   5  -3   -0.16    4.36
   6   5  -2   17.63    5.66
  -6  -5   2   19.77    6.52
   6   5  -1   12.28    4.92
  -6  -5   1    8.38    6.24
   6   5   0   18.63    6.34
  -6  -5   0   -3.36    5.35
  -6  -5  -1   19.32    6.87
   6   5   1    9.03    5.33
  -6  -5  -2   79.97    9.78
   6   5   2   84.87    9.89
   6   5   3   19.27    6.28
  -6  -5  -3    7.34    4.60
   6   5   4   25.86    6.41
  -6  -5  -4   26.50    6.84
   6   5   5   -4.37    5.40
  -6  -5  -5   -3.65    4.89
   6   5   6   26.06    6.53
  -6  -5  -6   21.21    6.46
   6   5   7   -4.05    5.92
  -6  -5  -7   11.30    5.92
  -6  -5  -7   12.48    6.84
   6   5   8   -3.29    6.13
  -6  -5  -8    6.73    4.95
  -6  -5  -8   -0.80    6.29
  -6  -5  -9   49.13    7.69
  -6  -5  -9   67.52   11.65
   6   5   9   53.61    9.94
  -6  -5 -10   37.81    9.65
   6   5  10   39.56    9.60
  -6  -5 -10   32.10    6.49
   6   5  11   30.84    9.55
  -6  -5 -11    2.81    4.66
  -6  -5 -11   17.01    8.28
   6   5  12    3.06    7.36
  -6  -5 -12   16.67    5.88
  -6  -5 -12    4.44    8.90
   6   5  13   33.94    9.88
  -6  -5 -13   32.63    6.42
  -6  -5 -13   20.17    9.68
   6   5  14    1.54    9.53
  -6  -5 -14    0.98    4.30
  -6  -5 -14  -12.71    8.95
  -6  -5 -15   13.33    8.22
   6   5  15   15.82   10.76
   6   5  16    7.75    7.11
  -6  -5 -16    2.99    8.34
   6   5  17   54.46   15.56
   6   5  17   43.76   10.81
   6   5  18   32.97   13.96
  -6  -5 -18   14.14   10.83
   6   5  18   15.40    8.25
  -6  -5 -19    3.62   10.71
   6   5  19   27.98   10.68
  -6  -6  12   36.37   14.54
   6   6 -12   29.73    9.13
  -6  -6  11   34.87   13.60
   6   6 -11   20.93    7.82
  -6  -6  11   17.96    6.07
   6   6 -10    3.04    6.07
  -6  -6  10   10.73    5.02
  -6  -6   9   -7.07    8.87
   6   6  -9   -0.05    5.84
  -6  -6   9    8.89    5.38
  -6  -6   8    2.12    9.56
   6   6  -8   -1.20    6.28
  -6  -6   8    1.99    3.93
  -6  -6   7   -4.42    7.63
   6   6  -7    5.46    6.00
  -6  -6   7    5.36    4.45
  -6  -6   6   50.09    7.17
  -6  -6   6   40.88   10.99
   6   6  -6   37.92    7.83
  -6  -6   5   -1.25    3.90
   6   6  -5   -6.97    5.79
  -6  -6   5    8.59    8.17
   6   6  -4   -2.83    5.26
  -6  -6   4    0.10    6.72
   6   6  -3    4.17    5.11
  -6  -6   3   18.61    7.67
   6   6  -2   13.22    5.77
  -6  -6   2   21.36    8.97
   6   6  -1    1.32    4.89
  -6  -6   1    5.85    6.46
  -6  -6   0   36.31    9.36
   6   6   0   26.80    7.49
  -6  -6  -1   16.40    8.63
   6   6   1    7.89    5.00
  -6  -6  -2   27.97    8.94
   6   6   2   34.82    8.20
  -6  -6  -3  179.08   16.21
   6   6   3  230.95   16.44
  -6  -6  -4   60.70    9.23
   6   6   4   64.29    9.73
  -6  -6  -5   -3.09    5.30
   6   6   5   -2.78    6.01
  -6  -6  -6    6.13    5.97
   6   6   6    1.31    5.81
  -6  -6  -7    1.97    5.58
   6   6   7   23.13    7.84
  -6  -6  -8    0.98    5.71
   6   6   8   -5.94    6.33
  -6  -6  -9    1.39    7.69
  -6  -6  -9   -0.36    5.06
   6   6   9    9.47    7.25
  -6  -6 -10    2.70    7.36
  -6  -6 -10    7.04    5.36
   6   6  10    0.75    7.50
  -6  -6 -11   75.19    9.56
   6   6  11   92.82   13.51
  -6  -6 -11  113.11   15.59
   6   6  12    1.64    8.00
  -6  -6 -12    2.91    4.49
  -6  -6 -12  -11.33    8.67
  -6  -6 -13   19.09    9.23
  -6  -6 -13   20.37    6.13
   6   6  13   24.24   10.67
   6   6  14  -12.98   11.40
  -6  -6 -14    6.99    8.72
   6   6  15    4.20    8.85
  -6  -6 -15    1.60    9.59
   6   6  16   -8.74   10.83
  -6  -6 -16   -3.75    8.53
   6   6  17   22.56   14.32
  -6  -6 -17   -0.20    9.56
   6   6  18   -9.02   10.39
  -6  -6 -18    1.24   10.41
   6   7 -10   13.38    7.98
  -6  -7  10    7.21   11.49
   6   7  -9   -4.37    7.79
  -6  -7   9   10.67   10.68
   6   7  -8    3.91    6.37
  -6  -7   8   14.12    8.77
   6   7  -7    1.13    6.14
  -6  -7   7   14.50    8.99
   6   7  -6   -7.03    5.86
  -6  -7   6    4.51   10.18
   6   7  -5   -0.91    5.75
  -6  -7   5  -11.93    8.16
   6   7  -4   13.37    6.86
  -6  -7   3   11.08    8.97
   6   7  -3   14.97    6.42
  -6  -7   2   16.80    9.68
   6   7  -2    6.15    5.71
  -6  -7   1    1.58    7.85
   6   7  -1   14.68    6.82
   6   7   0   13.81    6.40
  -6  -7   0   16.21    8.90
   6   7   1   19.56    8.17
  -6  -7  -1   18.44    7.95
   6   7   2   47.32    9.83
  -6  -7  -2   69.65   11.30
   6   7   3   10.43    7.12
  -6  -7  -3   -2.42    7.19
   6   7   4   -0.43    6.66
  -6  -7  -4   -3.17    6.97
   6   7   5   28.15    9.01
  -6  -7  -5   36.27    9.18
   6   7   6   13.07    7.95
  -6  -7  -6   11.10    7.74
   6   7   7   27.75    9.44
  -6  -7  -7   13.24    5.93
   6   7   8    1.58    6.32
  -6  -7  -8    5.27    6.72
   6   7   9    1.12    7.67
  -6  -7  -9   12.73    7.46
   6   7  10   -7.26    7.98
  -6  -7 -10   -2.96    5.24
   6   7  11   32.82   11.19
  -6  -7 -11   16.50    6.96
  -6  -7 -11   12.63    7.57
   6   7  12   11.18    9.71
  -6  -7 -12   -3.05    5.32
  -6  -7 -12   14.01   10.20
   6   7  13   19.07   11.18
  -6  -7 -13   18.13    6.92
  -6  -7 -13   17.70    9.60
  -6  -7 -14    6.26    9.56
   6   7  14   15.64   10.15
  -6  -7 -15   64.33   13.90
   6   7  15   79.43   16.18
  -6  -7 -16    6.61   10.24
   6   7  16    4.45   11.96
  -6  -7 -17   -7.33   10.78
   6   7  17   12.34   10.95
  -6  -8   8   21.47   11.37
   6   8  -8    2.98    6.97
  -6  -8   7    7.85   10.42
   6   8  -7   -0.79    6.66
  -6  -8   6    6.47   10.71
   6   8  -6   -0.84    6.10
   6   8  -5    5.78    5.95
  -6  -8   4    3.12    9.17
   6   8  -4   12.95    8.00
  -6  -8   3   42.06   12.42
   6   8  -3   25.52    9.00
  -6  -8   2    3.80    7.99
   6   8  -2    9.98    7.22
  -6  -8   1  -11.32    8.58
   6   8  -1   10.64    7.75
   6   8   0   -1.92    6.37
  -6  -8   0    1.82    8.81
   6   8   1   -5.96    7.56
  -6  -8  -1   11.36    9.45
   6   8   2    5.58    6.58
  -6  -8  -2   16.77    9.08
   6   8   3    4.37    7.61
  -6  -8  -3    8.05    8.35
   6   8   4   15.95    8.41
  -6  -8  -4    7.07    8.60
   6   8   5   25.17    8.68
  -6  -8  -5   11.13    7.32
   6   8   6   10.58    8.74
  -6  -8  -6   -2.46    6.69
   6   8   7   12.67    8.37
  -6  -8  -7   23.20    9.59
   6   8   8   15.18    9.36
  -6  -8  -8    2.56    6.59
   6   8   9   40.90   11.03
  -6  -8  -9   18.84    8.92
   6   8  10    0.50    7.81
  -6  -8 -10    4.23    6.65
  -6  -8 -11   17.82    7.71
   6   8  11   35.75   11.28
  -6  -8 -12   -2.22    6.72
   6   8  12   17.56   12.17
   6   8  13   16.80   12.04
   6   8  14   29.48   12.91
  -6  -8 -14   21.40    9.51
   6   8  15   20.37   12.61
  -6  -8 -15    0.96    8.50
   6   9  -4  -10.12    7.71
  -6  -9   4   -6.89    9.21
   6   9  -3    3.71    7.87
  -6  -9   3   10.50   10.99
   6   9  -2   27.76   10.72
  -6  -9   2   21.22   13.75
   6   9  -1    7.56    7.99
  -6  -9   1    1.89    9.96
   6   9   0    1.18    8.20
  -6  -9   0  -13.35   10.42
   6   9   1   -1.86    7.10
  -6  -9  -1   12.71    9.49
   6   9   2    7.35    7.36
  -6  -9  -2    0.69    8.31
   6   9   3   -5.68    8.02
  -6  -9  -3   -6.56   10.04
   6   9   4   -5.25    7.59
  -6  -9  -4   12.32    7.85
   6   9   5    5.76    8.23
  -6  -9  -5   -3.08    8.26
   6   9   6    0.97    7.62
  -6  -9  -6    9.59    9.01
   6   9   7   33.76   11.38
  -6  -9  -7   37.23   10.64
   6   9   8   -3.12    8.45
  -6  -9  -8   -7.14    7.47
  -6  -9  -9   68.93   12.59
   6   9   9   59.34   14.01
   6   9  10   19.10   10.08
  -6  -9 -10   11.37   10.20
   6   9  11   24.23   10.92
  -6  -9 -11   10.24    7.42
   6   9  12   14.07   10.03
   6   9  13  -10.27   11.57
   6  10   2   17.59   10.65
  -6 -10  -2   -2.12   11.36
   6  10   3   13.28    8.71
  -6 -10  -3    6.49    9.02
   6  10   4   14.96    9.55
  -6 -10  -4   16.75   10.76
   6  10   5    4.45    9.85
  -6 -10  -5   -5.12    9.38
   6  10   6   11.14   10.49
  -6 -10  -6   -2.32    8.68
   6  10   7   12.18   10.56
  -6 -10  -7   23.51   10.64
  -7   8   9   -0.82    4.63
  -7   8   8    5.70    6.63
  -7   8   7   20.31    6.44
  -7   8   6   16.84    7.18
  -7   8   5   16.54    6.04
  -7   8   4   -3.99    5.90
  -7   8   3   10.23    5.49
  -7   8   2   25.70    7.08
  -7   8   1    0.98    5.46
  -7   8   0   15.91    7.51
  -7   8  -1   -1.01    5.46
  -7   8  -2   39.49    8.83
  -7   8  -3   13.00    6.77
  -7   8  -4    8.94    7.65
  -7   7  11    5.18    5.57
  -7   7  10    2.65    4.29
  -7   7   9    4.35    4.98
  -7   7   8    1.76    4.03
  -7   7   7   -1.28    4.75
  -7   7   6    2.32    5.22
  -7   7   5   13.63    4.74
  -7   7   4   16.42    6.22
  -7   7   3   59.46    9.13
  -7   7   2   82.99    9.98
  -7   7   1    3.32    4.52
  -7   7   0    2.86    4.88
  -7   7  -1    6.58    5.62
  -7   7  -2   13.97    6.90
  -7   7  -3    6.91    5.40
  -7   7  -4   22.28    6.70
  -7   7  -5    5.42    5.26
  -7   7  -6   -0.19    4.96
  -7   7  -7    1.02    5.68
  -7   7  -8    7.76    5.58
  -7   6  12    4.91    4.43
  -7   6  11   -0.82    4.55
  -7   6  10   -0.40    4.77
  -7   6   9    4.84    5.19
  -7   6   8   17.46    5.74
  -7   6   7   47.33    7.83
  -7   6   6   72.70    9.00
  -7   6   5   24.74    6.01
  -7   6   4   76.76    9.34
  -7   6   3   17.03    5.86
  -7   6   2   26.98    6.06
  -7   6   1    1.04    4.13
  -7   6   0   26.73    6.59
  -7   6  -1    8.69    4.61
  -7   6  -2   14.22    5.82
  -7   6  -3   -1.40    4.51
  -7   6  -5   -8.34    5.90
  -7   6  -6   17.39    6.19
   7  -6   6   13.05    6.01
  -7   6  -7   34.53    8.85
   7  -6   7   30.48    7.19
  -7   6  -8   73.26   10.93
   7  -6   8   66.70   10.11
  -7   6  -9   28.92    7.54
   7  -6   9   13.60    6.40
  -7   6 -10   30.92    7.98
   7  -6  10   20.54    7.34
  -7   6 -11   -3.97    5.55
   7  -6  11    9.07    8.53
  -7   5  15    6.07    6.31
  -7   5  13    2.98    4.77
  -7   5  12   -6.01    5.32
  -7   5  11    5.73    5.18
  -7   5  10    2.97    3.96
  -7   5   9   -0.84    4.33
  -7   5   8  142.55   12.29
  -7   5   7   33.71    6.56
  -7   5   6   87.80    9.50
  -7   5   5   42.03    7.15
  -7   5   4   17.42    5.63
  -7   5   3   13.48    5.14
  -7   5   2    5.72    5.32
  -7   5   1    9.75    4.63
  -7   5   0   -0.62    4.14
  -7   5  -1    0.20    4.42
  -7   5  -1    0.02    3.53
   7  -5   2   10.91    4.09
  -7   5  -2    0.44    4.83
  -7   5  -2   11.70    5.47
  -7   5  -3   26.50    6.27
   7  -5   3   41.28    6.56
  -7   5  -4    6.66    4.61
   7  -5   4   12.73    5.22
  -7   5  -5    3.65    5.25
   7  -5   5    3.16    4.58
  -7   5  -6  190.25   14.86
   7  -5   6  172.56   13.52
  -7   5  -7   34.48    6.95
   7  -5   7   43.47    8.28
  -7   5  -8   47.70    8.04
   7  -5   8   51.16    8.75
  -7   5  -9   17.54    6.31
   7  -5   9    4.43    5.43
  -7   5 -10    8.73    5.72
   7  -5  10    7.29    6.42
  -7   5 -11    9.49    6.32
   7  -5  11   11.78    7.14
  -7   5 -12    4.45    4.95
   7  -5  12    7.14    7.72
  -7   5 -13   15.72    7.00
   7  -5  13   -3.36    7.19
  -7   4  16   -1.13    7.05
  -7   4  15    6.92    7.10
  -7   4  14    7.79    4.89
  -7   4  13   -6.55    5.13
  -7   4  12   32.88    7.32
  -7   4  11   10.17    5.57
  -7   4  10   99.20   10.30
  -7   4   9   75.32    9.01
  -7   4   9   99.15   12.19
  -7   4   8  520.88   22.02
  -7   4   8  585.19   25.80
  -7   4   7    3.48    3.96
  -7   4   7   13.17    5.82
  -7   4   6   80.35    9.43
  -7   4   6   78.33    9.00
  -7   4   5   23.60    5.96
  -7   4   4    1.76    3.90
  -7   4   3   -0.40    3.96
  -7   4   2    3.21    3.48
  -7   4   1   -0.82    3.99
  -7   4   0   31.71    6.12
  -7   4   0   33.37    7.19
  -7   4  -1    8.38    5.84
  -7   4  -1   -4.79    4.74
  -7   4  -2  120.55   11.41
  -7   4  -2   92.58   10.63
   7  -4   3   41.37    6.47
  -7   4  -3   20.83    6.02
  -7   4  -4  175.71   13.13
   7  -4   4  199.52   13.02
  -7   4  -5   23.50    6.15
   7  -4   5   24.68    6.00
  -7   4  -6  143.56   12.40
   7  -4   6  172.06   13.10
  -7   4  -7    2.69    4.94
   7  -4   7   -4.73    4.97
  -7   4  -8    3.25    3.90
   7  -4   8    9.79    5.92
  -7   4  -9   -5.68    5.32
   7  -4   9    2.37    5.95
  -7   4 -10   -0.59    4.37
   7  -4  10    4.51    6.27
  -7   4 -11    4.53    5.41
   7  -4  11    3.43    5.77
  -7   4 -12   -4.93    5.44
   7  -4  12   -1.03    6.76
  -7   4 -13   17.72    6.40
   7  -4  13   10.38    7.25
  -7   4 -14    0.12    5.40
   7  -4  14    2.48    8.31
  -7   3  17   18.43    8.85
  -7   3  16   45.05   10.67
  -7   3  15    7.62    6.12
  -7   3  14    7.34    6.10
  -7   3  13   -0.94    4.56
  -7   3  12  129.68   12.09
  -7   3  11   -5.80    4.97
  -7   3  10  152.85   12.39
  -7   3   9   -2.11    4.30
  -7   3   8   78.00    8.97
  -7   3   7   38.40    6.82
  -7   3   6   21.61    5.95
  -7   3   6   10.24    4.48
  -7   3   5    6.90    4.55
  -7   3   5   10.30    4.66
  -7   3   4  113.64    6.92
  -7   3   4  115.64   10.53
  -7   3   3    6.02    3.84
  -7   3   2   79.49    8.72
  -7   3   1    0.96    3.39
  -7   3   0   -1.68    4.44
  -7   3   0    2.02    3.57
  -7   3  -1   13.00    5.47
  -7   3  -1    9.05    4.37
  -7   3  -2  326.03   18.04
   7  -3   3   16.03    5.04
  -7   3  -3   11.47    5.19
  -7   3  -3    7.65    5.69
  -7   3  -4 1264.87   33.08
   7  -3   4 1335.42   32.34
   7  -3   5   -0.54    4.06
  -7   3  -5    5.46    3.90
   7  -3   6    3.31    5.19
  -7   3  -6    3.70    3.85
   7  -3   7   10.65    5.35
  -7   3  -7   13.99    5.43
   7  -3   8   16.64    5.63
  -7   3  -8    8.71    4.95
   7  -3   9   -0.11    4.98
  -7   3  -9    0.72    4.27
   7  -3  10    5.79    5.98
  -7   3 -10   17.11    5.87
   7  -3  11    1.18    5.37
  -7   3 -11    1.24    4.43
   7  -3  12    0.88    6.22
  -7   3 -12   22.98    7.01
   7  -3  13   19.21    8.42
  -7   3 -13    8.50    5.70
   7  -3  14    4.86    6.92
  -7   3 -14    4.26    4.63
   7  -3  15   -6.39    8.02
  -7   3 -15    4.47    4.99
   7  -3  16    9.22    9.68
  -7   3 -16   14.04    6.77
  -7   2  15   11.09    6.02
  -7   2  14   46.88    8.53
  -7   2  13    7.08    5.16
  -7   2  12  105.24   11.08
  -7   2  11   18.97    5.87
  -7   2  10   11.57    4.65
  -7   2   9   12.21    5.60
  -7   2   8   13.06    5.19
  -7   2   7   14.90    6.17
  -7   2   6  109.88   10.47
  -7   2   5   -1.50    3.43
  -7   2   5    4.36    4.09
  -7   2   4   -0.15    2.59
  -7   2   4    4.67    3.92
  -7   2   3    4.32    3.65
  -7   2   2  138.81   11.38
  -7   2   1    3.25    3.64
  -7   2   0 1008.46   29.99
  -7   2   0 1110.90   30.19
  -7   2  -1   -5.75    4.65
  -7   2  -1    2.29    3.54
  -7   2  -2  334.86   18.72
  -7   2  -2  394.72   18.13
  -7   2  -3   18.61    7.48
  -7   2  -3   21.05    5.66
   7  -2   4    2.16    4.29
  -7   2  -4    2.13    3.85
  -7   2  -4    2.12    5.40
  -7   2  -5   76.94    8.36
   7  -2   5   86.90    8.98
   7  -2   6  147.78   12.11
  -7   2  -6  129.74   10.72
   7  -2   7    4.79    4.70
  -7   2  -7   -0.07    4.13
   7  -2   8    3.94    5.72
  -7   2  -8    4.89    4.02
   7  -2   9    6.73    5.96
  -7   2  -9    0.12    4.18
   7  -2  10   39.16    7.97
  -7   2 -10   38.18    6.39
   7  -2  11    3.87    5.59
  -7   2 -11    5.32    5.46
   7  -2  12    4.78    5.40
  -7   2 -12    9.17    5.71
   7  -2  13   -3.46    6.68
  -7   2 -13   -0.29    4.29
   7  -2  14    9.10    6.87
  -7   2 -14    9.09    4.86
   7  -2  15    9.09    8.20
  -7   2 -15   -0.28    4.48
   7  -2  16   22.03    7.88
  -7   2 -16   18.02    5.44
   7  -2  17   -4.82    9.08
  -7   2 -17   -6.43    5.62
  -7   1  17    2.05    7.37
  -7   1  16   51.14   11.37
  -7   1  15    7.24    6.34
  -7   1  15    7.92    5.97
  -7   1  14  146.90   15.06
  -7   1  14  135.77   14.23
  -7   1  13    1.70    5.31
  -7   1  12   24.86    7.24
  -7   1  11   17.03    5.22
  -7   1  10    3.28    4.84
  -7   1   9    7.90    5.05
  -7   1   8    2.27    4.54
  -7   1   7   -1.26    3.85
  -7   1   6   77.17    9.13
  -7   1   5    1.81    4.23
  -7   1   4  127.42   11.26
  -7   1   3    2.10    3.83
  -7   1   2  663.94   23.98
  -7   1   1   -6.41    5.25
  -7   1   0  336.54   16.77
  -7   1  -1    6.41    5.03
  -7   1  -2  178.80   14.51
  -7   1  -2  207.36   13.40
  -7   1  -3    0.40    6.16
  -7   1  -3   10.44    5.26
  -7   1  -4   81.26   10.79
  -7   1  -4  100.10    9.56
   7  -1   5    8.47    4.49
  -7   1  -5    1.74    5.80
  -7   1  -5    6.48    3.66
   7  -1   6    3.42    3.92
  -7   1  -6   17.84    6.96
  -7   1  -6    9.17    4.32
  -7   1  -7    9.33    4.76
   7  -1   7    0.77    4.13
  -7   1  -8   14.29    4.58
   7  -1   8   11.91    6.32
  -7   1  -9    4.59    3.92
   7  -1   9    4.25    4.94
  -7   1 -10   16.69    5.90
   7  -1  10    3.37    5.34
  -7   1 -11   -4.08    4.19
   7  -1  11    3.39    4.91
  -7   1 -12   18.46    6.05
   7  -1  12   17.27    7.40
  -7   1 -13    5.34    4.19
   7  -1  13    7.76    7.66
  -7   1 -14   15.29    5.55
   7  -1  14   24.60    8.12
  -7   1 -15    2.86    3.95
   7  -1  15   -8.67    7.17
  -7   1 -16    2.24    3.90
   7  -1  16   11.84    7.14
  -7   1 -17    0.88    4.10
   7  -1  17    4.98    8.06
  -7   0  16   23.62    8.27
  -7   0  16   23.80    8.16
  -7   0  15   -9.05    5.86
  -7   0  15    1.46    7.33
  -7   0  14    5.72    7.06
  -7   0  14   -6.29    6.35
  -7   0  13    1.57    5.69
  -7   0  12   21.67    7.04
  -7   0  11   -1.48    5.08
  -7   0  10   11.74    6.16
  -7   0   9    7.92    4.75
  -7   0   8   35.62    7.10
  -7   0   7   -3.05    5.12
  -7   0   6    0.21    4.19
  -7   0   5   25.20    6.16
  -7   0   4 1105.71   31.77
  -7   0   3   48.70    7.60
  -7   0   2  326.49   17.62
  -7   0   1   68.87    8.62
  -7   0  -1   19.24    7.36
  -7   0  -1   18.83    5.30
  -7   0  -2   -3.98    5.08
  -7   0  -2    1.03    3.46
  -7   0  -3  -11.18    6.88
  -7   0  -3    2.59    4.50
  -7   0  -4   -0.87    6.41
  -7   0  -4    5.28    4.40
  -7   0  -5   -0.06    5.73
  -7   0  -5    8.62    4.67
   7   0   6   38.84    6.66
  -7   0  -6   28.24    7.56
  -7   0  -6   40.50    6.66
   7   0   7    3.32    4.26
  -7   0  -7    2.24    6.94
  -7   0  -7   -0.96    3.26
   7   0   8   -0.28    4.46
  -7   0  -8    2.02    6.16
  -7   0  -8   -0.49    3.73
   7   0   9   25.31    6.76
  -7   0  -9   31.55    6.23
   7   0  10   36.51    8.62
  -7   0 -10   21.09    5.67
   7   0  11   54.37    8.95
  -7   0 -11   50.69    7.17
   7   0  12  147.35   14.94
  -7   0 -12  145.79   11.62
  -7   0 -13   20.14    5.36
   7   0  13   -0.59    5.27
  -7   0 -14   -2.93    4.45
   7   0  14    6.19    6.03
  -7   0 -15    8.00    5.04
   7   0  15   22.36    8.53
  -7   0 -16   -0.35    3.88
   7   0  16   -2.16    7.50
  -7   0 -17    2.58    4.11
   7   0  17   -0.84    6.94
   7   0  18   12.13    8.59
  -7  -1  16   24.76    9.03
  -7  -1  16   19.85    8.99
  -7  -1  15    3.93    6.48
  -7  -1  15    8.81    6.90
  -7  -1  14   -8.90    7.61
  -7  -1  14    8.89    5.91
  -7  -1  13   -3.65    7.67
  -7  -1  13   -3.81    5.51
  -7  -1  12    1.92    5.40
  -7  -1  11   -3.07    5.08
  -7  -1  10   18.04    7.66
  -7  -1   9    4.75    4.95
  -7  -1   8   81.68   10.33
  -7  -1   7   52.09    8.99
  -7  -1   6  261.92   16.72
  -7  -1   5   86.30   10.10
  -7  -1   4  314.52   17.81
  -7  -1   3   36.98    6.93
  -7  -1   2  184.76   13.73
  -7  -1   1    8.23    4.63
  -7  -1  -1   50.42    7.63
  -7  -1  -2   57.39    7.94
  -7  -1  -2   39.23    9.19
  -7  -1  -3   17.52    5.36
  -7  -1  -3    8.66    6.33
  -7  -1  -4   31.15    5.84
  -7  -1  -4   24.03    7.05
  -7  -1  -5   -6.94    4.41
  -7  -1  -5    4.78    6.57
  -7  -1  -6    0.20    5.86
  -7  -1  -6   -1.43    4.05
  -7  -1  -7    0.53    5.74
  -7  -1  -7   11.69    5.12
   7   1   7    4.26    2.36
   7   1   8   97.08   11.00
  -7  -1  -8   84.47    8.72
  -7  -1  -8   75.03   11.27
   7   1   8   97.56    6.97
   7   1   9   63.58    9.31
  -7  -1  -9   64.09    7.72
  -7  -1  -9   55.38   10.14
   7   1   9   68.09    7.52
   7   1  10  163.25   14.73
   7   1  10  183.06   12.81
  -7  -1 -10  180.01   12.32
  -7  -1 -11   13.95    4.90
   7   1  11    9.50    5.91
  -7  -1 -12   12.66    4.59
   7   1  12    0.81    5.31
  -7  -1 -13   29.43    6.37
   7   1  13   37.95    9.40
  -7  -1 -14   17.24    5.00
   7   1  14    8.18    6.59
  -7  -1 -15    3.64    4.38
   7   1  15   -2.71    7.60
  -7  -1 -16    9.37    4.95
   7   1  16    8.11    6.63
   7   1  17    4.28    7.26
   7   1  18   -7.68    7.38
  -7  -2  15   17.75    8.40
  -7  -2  15   -1.01    6.74
  -7  -2  14   60.49   10.49
  -7  -2  14   52.30   11.24
   7   2 -13   -5.40    7.37
  -7  -2  13    1.49    5.84
  -7  -2  13    3.34    7.13
  -7  -2  12   56.47   11.12
   7   2 -12   55.22   10.17
  -7  -2  12   69.90   10.03
  -7  -2  11    1.67    6.52
   7   2 -11   72.41   15.98
   7   2 -10   14.37    7.21
  -7  -2  10   13.59    5.76
  -7  -2   9   51.74   10.10
   7   2  -9   53.46    8.35
   7   2  -8  137.38   12.54
  -7  -2   8  155.37   14.93
   7   2  -7   49.51    7.36
  -7  -2   7   39.31    7.23
  -7  -2   6 1252.65   37.94
   7   2  -6 1176.70   30.49
  -7  -2   5  159.94   14.34
   7   2  -5  132.95   10.06
   7   2  -4   10.08    4.71
  -7  -2   4   -4.00    5.67
   7   2  -3   -1.74    3.16
  -7  -2   3   -0.13    4.74
  -7  -2   2  147.25   12.51
   7   2  -2  130.49    7.90
   7   2  -1   14.87    3.12
  -7  -2   0   -7.80    5.42
   7   2   0   -0.79    2.15
  -7  -2  -1    0.27    3.94
   7   2   1    4.54    2.19
   7   2   2   20.28    2.77
  -7  -2  -2   23.76    5.34
  -7  -2  -3   -5.12    7.57
  -7  -2  -3    1.31    3.83
   7   2   3    2.09    1.72
  -7  -2  -4    3.01    5.78
  -7  -2  -4    4.50    4.46
   7   2   4    0.22    1.95
  -7  -2  -5   -0.81    3.90
   7   2   5    4.66    2.53
  -7  -2  -6   35.01    6.49
  -7  -2  -6   32.63    8.80
   7   2   6   30.88    4.00
  -7  -2  -7   44.65    7.24
  -7  -2  -7   48.41   11.05
   7   2   7   54.38    5.68
  -7  -2  -8   76.40    8.92
   7   2   8   94.97    8.24
  -7  -2  -8   77.00   12.03
   7   2   9   31.38    6.84
  -7  -2  -9   24.83    7.87
  -7  -2  -9   11.54    4.79
   7   2  10    2.33    4.80
  -7  -2 -10    1.81    6.21
  -7  -2 -10   -0.37    4.27
   7   2  10    8.17    5.93
   7   2  11   25.16    7.36
  -7  -2 -11   19.69    9.43
  -7  -2 -11   16.58    5.57
   7   2  11   21.02    7.09
   7   2  12   26.97    8.40
   7   2  12   14.17    6.74
  -7  -2 -12   12.99    4.45
  -7  -2 -12   22.27   10.17
   7   2  13   16.70    7.91
  -7  -2 -13    4.64    3.79
  -7  -2 -13   22.20    9.48
  -7  -2 -14    9.82    4.77
   7   2  14   11.52    6.98
  -7  -2 -15    7.44    4.51
   7   2  15    3.38    6.57
  -7  -2 -16    2.76    4.23
   7   2  16    3.04    7.60
   7   2  17    6.70    8.70
  -7  -3  14    1.30    5.58
  -7  -3  14   12.28    8.45
   7   3 -14    5.41    7.41
  -7  -3  13    9.45    6.46
   7   3 -13   -1.91    7.74
  -7  -3  13  -11.56    9.49
   7   3 -12   37.05    9.81
  -7  -3  12   42.83    9.14
  -7  -3  12   39.37   10.59
   7   3 -11   26.60    8.38
  -7  -3  11   27.38    9.34
  -7  -3  11   34.60    7.42
   7   3 -10  149.08   14.36
  -7  -3  10  129.61   15.02
   7   3  -9   45.46    8.86
  -7  -3   9   41.37    9.10
  -7  -3   8   90.53   12.13
   7   3  -8   86.73   10.24
  -7  -3   7   90.73   12.31
   7   3  -7   89.56    9.63
  -7  -3   6   -1.26    5.67
   7   3  -6   -3.46    5.35
  -7  -3   5    4.55    5.63
   7   3  -5    3.56    4.50
  -7  -3   4  223.69   16.76
   7   3  -4  172.52   11.33
  -7  -3   3   11.07    5.68
   7   3  -3    4.77    3.71
  -7  -3   2   17.30    6.38
   7   3  -2   17.92    4.02
  -7  -3   1   23.05    6.64
   7   3  -1   11.47    3.59
  -7  -3   0   44.21    8.30
   7   3   0   32.46    4.93
   7   3   1    0.75    2.69
  -7  -3  -1    0.19    5.15
   7   3   2   -2.45    2.68
  -7  -3  -2    5.53    4.42
  -7  -3  -3   -2.34    3.83
   7   3   3    3.95    3.28
  -7  -3  -4   34.79    7.33
  -7  -3  -4   15.82    6.84
   7   3   4   25.47    4.60
  -7  -3  -5  113.50   11.36
  -7  -3  -5  125.78   14.89
   7   3   5  138.92    8.99
  -7  -3  -6   80.53    9.28
   7   3   6  101.45    8.02
  -7  -3  -6   82.23   11.79
   7   3   7   11.05    3.84
  -7  -3  -7   17.04    5.72
  -7  -3  -7   10.34    7.81
   7   3   8    5.71    5.15
  -7  -3  -8    3.31    4.48
  -7  -3  -8   -5.46    6.96
   7   3   9    7.14    5.50
  -7  -3  -9    4.98    4.60
  -7  -3  -9   -3.21    7.52
   7   3  10   14.89    6.48
  -7  -3 -10   23.33    6.20
  -7  -3 -10   30.49    9.23
   7   3  11    9.82    7.33
  -7  -3 -11    8.78    8.14
  -7  -3 -11   10.55    4.72
   7   3  12   -3.32    4.95
   7   3  12    5.95    7.10
  -7  -3 -12   10.28    4.96
  -7  -3 -12    3.79    6.72
   7   3  13    4.53    6.88
  -7  -3 -13    1.57    4.48
  -7  -3 -13   12.37    9.40
  -7  -3 -14   11.36    5.49
   7   3  14   13.04    8.18
  -7  -3 -15    8.22    4.45
   7   3  15    6.73    6.97
  -7  -3 -16   -5.58    9.00
   7   3  16   -8.28    6.57
   7   3  17   12.46    9.07
   7   3  18  -16.67    8.58
   7   4 -13   39.53   10.73
  -7  -4  13   44.52    9.05
  -7  -4  13   19.93    9.35
   7   4 -12   46.68   10.40
  -7  -4  12   54.03   13.33
  -7  -4  12   43.26    7.55
  -7  -4  11   61.30    9.88
   7   4 -11   54.21   11.49
  -7  -4  11   57.84   13.75
  -7  -4  10   25.77    6.85
   7   4 -10   21.80    8.62
  -7  -4  10   15.53    8.86
   7   4  -9   51.48    9.54
  -7  -4   9   45.43   11.24
   7   4  -8    7.43    5.63
  -7  -4   8   11.21    7.13
   7   4  -7    2.90    4.92
  -7  -4   7   -5.79    5.94
   7   4  -6   11.62    5.82
  -7  -4   6    9.82    6.79
   7   4  -5    0.53    4.09
  -7  -4   5    0.88    6.02
   7   4  -4   -5.57    4.35
  -7  -4   4    1.63    7.12
   7   4  -3    7.28    4.93
  -7  -4   3    9.28    6.31
   7   4  -2    0.17    3.60
   7   4  -1    3.82    3.59
  -7  -4   1    9.18    5.86
   7   4   0   -1.42    3.48
  -7  -4   0    4.84    5.81
   7   4   1    4.00    3.93
  -7  -4  -1   -0.36    4.84
  -7  -4  -2   43.37    7.94
   7   4   2   28.44    5.82
  -7  -4  -3   94.09   11.42
   7   4   3   97.19    9.12
  -7  -4  -4   51.30    8.61
   7   4   4   58.61    7.42
  -7  -4  -5   23.46    5.61
   7   4   5   54.04    7.69
  -7  -4  -6   -4.52    6.08
  -7  -4  -6   -3.39    4.37
   7   4   6    1.39    4.43
  -7  -4  -7    2.97    6.27
  -7  -4  -7   -1.60    4.26
   7   4   7   -5.52    4.71
  -7  -4  -8   -2.72    6.50
   7   4   8    5.93    5.38
  -7  -4  -8   -1.68    4.33
  -7  -4  -9   18.21    8.44
  -7  -4  -9   17.95    5.13
   7   4  10    9.39    6.55
  -7  -4 -10   -2.06    4.09
   7   4  11    4.39    6.20
  -7  -4 -11   -2.80    4.54
   7   4  12   -1.34    6.67
  -7  -4 -12    3.61    4.06
  -7  -4 -12   -7.31    9.44
   7   4  13    8.76    7.04
  -7  -4 -13   13.83    4.86
  -7  -4 -13    5.73    7.26
   7   4  14   19.30    9.45
  -7  -4 -14    1.03    7.78
  -7  -4 -14    3.39    4.13
   7   4  15   -5.14    5.67
  -7  -4 -15   -1.31    8.20
   7   4  15   15.71   10.43
   7   4  16    7.47    6.31
  -7  -4 -16    9.72    8.06
   7   4  16  -11.10   10.09
   7   4  17   -1.18    6.63
  -7  -4 -17    9.42    9.17
   7   4  18   -3.36    6.97
  -7  -4 -18   30.36   12.58
  -7  -5  12   16.49   11.87
  -7  -5  12    7.58    5.81
   7   5 -12   13.45    9.22
  -7  -5  11   45.83   13.04
  -7  -5  11   36.12    7.61
   7   5 -11   32.66    8.66
   7   5 -10    7.86    6.81
  -7  -5  10    7.14    9.43
  -7  -5  10    0.39    5.37
   7   5  -9   12.36    7.16
  -7  -5   9   -1.55    7.67
  -7  -5   9   -2.36    5.08
   7   5  -8    1.74    5.43
  -7  -5   8    2.40    8.35
  -7  -5   8   -9.94    5.48
   7   5  -7   -1.69    5.33
  -7  -5   7   -9.02    7.90
   7   5  -6    7.26    5.54
  -7  -5   6    9.13    7.99
   7   5  -5   -1.75    4.51
  -7  -5   5   -3.89    6.77
   7   5  -4   24.55    7.07
  -7  -5   4   36.70    9.80
   7   5  -3    2.89    4.29
   7   5  -2   -2.11    4.52
  -7  -5   2    7.31    5.84
   7   5  -1   -1.89    4.30
  -7  -5   1    5.24    6.86
   7   5   0    2.21    4.15
  -7  -5   0    2.16    5.97
  -7  -5  -1  207.66   16.74
   7   5   1  227.70   14.92
  -7  -5  -2  120.97   13.47
   7   5   2  111.03   10.58
  -7  -5  -3   40.34    8.71
   7   5   3   65.33    8.89
   7   5   4   12.65    5.53
  -7  -5  -4   10.29    6.27
   7   5   5   -0.36    5.33
  -7  -5  -5    4.89    5.22
   7   5   6    5.67    5.30
  -7  -5  -6    3.34    4.96
   7   5   7   13.57    6.48
  -7  -5  -7   15.16    5.83
   7   5   8    6.95    6.45
  -7  -5  -8  -11.94    5.87
  -7  -5  -8    3.77    7.08
   7   5   9   12.00    7.53
  -7  -5  -9    5.28    4.87
  -7  -5  -9    8.86    7.65
   7   5  10    5.38    6.82
  -7  -5 -10    8.67    4.87
  -7  -5 -10    2.08    7.52
   7   5  11   42.84    9.60
  -7  -5 -11   31.56    6.70
  -7  -5 -11   30.67   11.89
   7   5  12   -3.42    8.21
  -7  -5 -12    8.68    5.18
  -7  -5 -12   -9.65    8.58
  -7  -5 -13   49.42   12.64
  -7  -5 -13   37.11    7.14
   7   5  13   22.06    8.87
  -7  -5 -14   18.03   10.97
  -7  -5 -14    3.49    4.57
   7   5  14    0.94    8.43
   7   5  15   22.45   10.86
  -7  -5 -15   -4.42    9.30
   7   5  16    4.52    9.60
  -7  -5 -16   -8.75    9.46
   7   5  17   19.15   12.17
  -7  -5 -17   28.36   10.59
  -7  -6  10   -7.57    9.24
   7   6 -10   16.71    8.44
  -7  -6   9    3.38    9.68
   7   6  -9  -13.49    7.15
  -7  -6   8   18.25    6.45
  -7  -6   8   28.95   10.55
   7   6  -8   10.99    7.00
  -7  -6   7    2.42    4.75
   7   6  -7   -4.21    5.87
  -7  -6   7  -11.39    8.88
   7   6  -6   21.44    7.59
  -7  -6   6   17.81    9.75
   7   6  -5    3.18    5.66
  -7  -6   5   16.58    8.55
   7   6  -4    0.21    5.82
  -7  -6   4    1.35    7.64
   7   6  -3   13.09    5.72
  -7  -6   3    3.24    9.50
   7   6  -2    0.59    5.10
  -7  -6   2    0.44    6.33
  -7  -6   1   57.41   11.02
   7   6  -1   55.74    9.62
  -7  -6   0   42.05   10.61
   7   6   0   39.54    8.27
  -7  -6  -1   54.30   10.77
   7   6   1   62.50    9.59
   7   6   2    1.03    4.72
  -7  -6  -2   -2.05    6.39
   7   6   3   -7.20    6.34
  -7  -6  -3   -2.36    6.22
  -7  -6  -4   53.70    9.71
   7   6   4   51.50    8.82
  -7  -6  -5   11.67    6.94
   7   6   5   -2.34    5.80
  -7  -6  -6   -4.11    5.47
   7   6   6   10.62    6.98
  -7  -6  -7    0.85    5.49
   7   6   7    3.62    5.95
  -7  -6  -8   -8.41    6.67
   7   6   8    0.61    7.07
  -7  -6  -9    0.13    7.82
  -7  -6  -9   -0.01    5.66
   7   6   9    3.08    6.88
  -7  -6 -10   18.34    9.69
  -7  -6 -10   -5.11    5.65
   7   6  10    1.47    7.65
  -7  -6 -11  100.08   11.56
  -7  -6 -11  117.08   15.95
  -7  -6 -12   69.00    9.86
   7   6  12   77.63   13.68
  -7  -6 -12   48.87   13.45
   7   6  13   22.43   10.69
  -7  -6 -13   15.94    6.14
  -7  -6 -13    6.03    8.31
  -7  -6 -14   10.44    9.36
   7   6  14   17.43   10.56
   7   6  15    0.52    9.58
  -7  -6 -15  -10.66   10.05
   7   6  16   29.69   12.26
  -7  -6 -16    9.87   10.22
   7   7  -8    2.58    6.56
  -7  -7   8   24.17   13.31
   7   7  -7    3.03    7.81
  -7  -7   7    1.59    9.60
   7   7  -6    8.32    7.46
  -7  -7   6   -7.41    8.66
  -7  -7   5   -7.41    9.07
   7   7  -5   -3.92    6.36
   7   7  -4   -1.17    6.85
  -7  -7   3   37.74   10.98
   7   7  -3   19.06    6.87
  -7  -7   2   16.73    9.36
   7   7  -2    2.53    6.26
  -7  -7   1   46.27   11.07
   7   7  -1   39.54    8.14
  -7  -7   0   -4.05    8.18
   7   7   0   19.26    7.97
  -7  -7  -1   -9.89    7.13
   7   7   1   11.58    6.93
  -7  -7  -2   30.95    9.40
   7   7   2   32.66    8.40
  -7  -7  -3   15.35    9.62
   7   7   3   -6.22    5.81
  -7  -7  -4    8.49    6.80
   7   7   4    4.05    6.52
  -7  -7  -5   30.94    9.42
   7   7   5   39.37    9.01
  -7  -7  -6    3.92    6.05
   7   7   6    8.07    7.91
  -7  -7  -7   15.37    7.13
   7   7   7   32.94    9.17
  -7  -7  -8    1.40    6.94
   7   7   8   -3.08    7.61
  -7  -7  -9    7.38    6.60
   7   7   9    5.41    7.92
  -7  -7 -10    1.68    5.57
   7   7  10  -11.77    9.19
  -7  -7 -11   -0.71    5.58
   7   7  11   -3.01    7.80
  -7  -7 -12    8.71   10.61
  -7  -7 -12    5.55    5.42
   7   7  12  -13.92    9.53
   7   7  13   30.63   12.20
  -7  -7 -13   50.18   13.20
   7   7  14    6.12   10.76
  -7  -7 -14  -11.41    9.68
   7   7  15    1.31   11.00
  -7  -7 -15    6.58   10.70
   7   8  -5   11.97    8.02
  -7  -8   5  -10.19   12.67
   7   8  -4    7.51    7.24
  -7  -8   4    8.90    9.88
   7   8  -3    6.89    6.73
  -7  -8   3   16.72   13.06
   7   8  -2   11.13    6.76
  -7  -8   2   11.61   11.64
   7   8  -1   -1.21    6.45
  -7  -8   1    3.63   10.32
   7   8   0    8.92    6.44
  -7  -8   0    2.94    9.39
   7   8   1   10.19    8.18
  -7  -8  -1    4.78    7.71
   7   8   2    1.16    6.85
  -7  -8  -2    2.74    9.08
   7   8   3   -0.21    7.50
  -7  -8  -3   -4.46    8.06
   7   8   4   25.59   12.79
  -7  -8  -4   -2.50    8.99
  -7  -8  -5   12.11    7.60
   7   8   5   25.57    9.53
  -7  -8  -6   -0.02    7.14
   7   8   6    8.95    8.51
  -7  -8  -7    9.72    9.04
   7   8   7   18.45    9.29
  -7  -8  -8   -1.24    6.83
   7   8   8   13.09    8.41
  -7  -8  -9    6.65    7.12
   7   8   9   -4.16    8.01
  -7  -8 -10    4.65    6.72
   7   8  10   25.33   10.80
  -7  -8 -11    1.29    7.40
   7   8  11    0.45    8.77
   7   8  12   -5.78    9.70
   7   8  13    2.39   10.08
  -7  -9   0   -3.63    9.14
   7   9   0   -7.69    7.96
  -7  -9  -1    2.85   12.07
   7   9   1    6.88    7.03
  -7  -9  -2   41.19   12.65
   7   9   2   28.00    9.52
  -7  -9  -3  -17.94   11.31
   7   9   3   13.01    9.18
  -7  -9  -4   12.15    8.55
   7   9   4   11.44    8.34
  -7  -9  -5  -18.78   10.27
   7   9   5    6.26    8.29
  -7  -9  -6    2.31    7.89
   7   9   6   13.22    9.13
  -7  -9  -7   20.04    9.06
   7   9   7    3.91    8.11
  -7  -9  -8  -13.65   10.33
   7   9   8  -15.01    9.46
  -7  -9  -9   13.66   10.63
   7   9   9   14.08   10.00
  -8   7   8   11.41    6.56
  -8   7   7   14.85    6.70
  -8   7   6   13.43    5.24
  -8   7   5   38.86    8.23
  -8   7   4    4.08    4.81
  -8   7   3    1.71    5.87
  -8   7   2    5.41    5.60
  -8   7   1    3.86    6.27
  -8   7   0   -6.32    5.26
  -8   7  -1    1.69    4.78
  -8   7  -2    7.96    6.61
  -8   7  -3    2.14    5.99
  -8   7  -4   25.43    7.67
  -8   6  11   49.97    8.82
  -8   6  10    1.98    4.75
  -8   6   9   21.63    6.87
  -8   6   8   18.96    6.54
  -8   6   7    9.90    5.17
  -8   6   6    9.64    5.75
  -8   6   5   23.23    6.57
  -8   6   4   25.07    5.97
  -8   6   3   -2.69    4.80
  -8   6   2    8.35    5.58
  -8   6   1   -0.19    4.31
  -8   6   0   -2.41    5.37
  -8   6  -1   -6.36    6.18
  -8   6  -2    5.50    5.00
  -8   6  -3    9.03    5.95
  -8   6  -5   -0.27    5.34
  -8   6  -6   51.38    9.47
  -8   6  -7    5.95    5.89
  -8   6  -8    6.43    5.94
  -8   5  12   18.39    7.15
  -8   5  11    1.64    5.37
  -8   5  10    2.75    5.39
  -8   5   9   14.48    6.02
  -8   5   8    6.77    4.34
  -8   5   7   -3.33    4.53
  -8   5   6    8.80    6.09
  -8   5   5   15.17    5.74
  -8   5   4   -3.73    4.71
  -8   5   3   12.83    5.86
  -8   5   2   -0.34    4.02
  -8   5   1    1.18    4.61
  -8   5   0   28.33    6.92
  -8   5  -1   -7.26    6.89
  -8   5  -2   47.41    8.65
  -8   5  -3    4.68    5.81
  -8   5  -4   -2.78    5.29
  -8   5  -5    7.94    5.78
   8  -5   5   10.85    6.58
  -8   5  -6    3.38    4.98
   8  -5   6   11.49    5.91
  -8   5  -7    7.76    6.09
   8  -5   7    8.30    6.50
  -8   5  -8   27.01    8.30
   8  -5   8   21.98    7.54
  -8   5  -9   22.27    8.13
   8  -5   9    5.61    6.22
  -8   5 -10   -4.69    5.87
   8  -5  10   13.43    8.22
  -8   4  13    2.56    5.53
  -8   4  12   27.07    6.69
  -8   4  11    4.16    4.60
  -8   4  10   -5.19    4.87
  -8   4   9   10.61    5.49
  -8   4   8   31.28    6.74
  -8   4   7   -3.64    4.61
  -8   4   6  -10.65    5.49
  -8   4   5   -2.40    4.47
  -8   4   4    7.23    6.25
  -8   4   3    6.81    4.21
  -8   4   2   16.97    5.59
  -8   4   1    0.33    4.53
  -8   4   0   86.29   10.03
  -8   4  -1    2.57    4.73
  -8   4  -1    7.55    5.78
  -8   4  -2   -1.87    4.05
  -8   4  -2    2.22    5.23
  -8   4  -3   -0.36    5.99
  -8   4  -4   23.40    6.89
  -8   4  -4   41.07    7.79
   8  -4   4   45.13    6.79
  -8   4  -5   18.99    6.59
  -8   4  -5   11.30    7.03
   8  -4   5   26.12    6.67
  -8   4  -6   11.16    4.69
   8  -4   6   18.10    4.95
  -8   4  -7    3.33    4.19
   8  -4   7   10.22    6.34
  -8   4  -8   11.00    6.01
   8  -4   8   20.46    7.40
  -8   4  -9    6.59    5.87
   8  -4   9    6.57    6.95
  -8   4 -10   11.55    6.20
   8  -4  10    7.72    6.97
  -8   4 -11    3.93    4.92
   8  -4  11    8.39    7.36
  -8   4 -12    3.29    4.64
   8  -4  12   31.40    9.86
  -8   3  14   42.36    9.19
  -8   3  13   -7.32    6.68
  -8   3  12    5.21    5.58
  -8   3  11   14.80    6.34
  -8   3  10   10.29    5.45
  -8   3   9    4.05    4.42
  -8   3   8   -5.65    5.71
  -8   3   7    4.69    4.59
  -8   3   6   45.32    7.89
  -8   3   5   -1.77    4.18
  -8   3   4   78.46    9.68
  -8   3   3    0.84    4.28
  -8   3   2    1.38    4.52
  -8   3   1   -3.47    4.92
  -8   3   0   -1.21    4.24
  -8   3  -1    4.80    4.41
  -8   3  -1   -3.02    5.27
  -8   3  -2   63.58   10.12
  -8   3  -3   12.48    4.69
  -8   3  -3   17.09    8.10
  -8   3  -4   64.99   10.86
  -8   3  -4   74.83    9.26
  -8   3  -5    0.55    4.39
  -8   3  -5    2.43    5.82
   8  -3   5    9.43    5.55
  -8   3  -6    6.26    4.59
  -8   3  -6    3.70    6.33
   8  -3   6    0.54    4.50
  -8   3  -7    5.50    5.34
   8  -3   7    6.71    6.35
  -8   3  -8   12.84    5.16
   8  -3   8   -6.47    5.43
  -8   3  -9   -2.76    3.98
   8  -3   9    6.00    5.30
  -8   3 -10   -1.88    4.54
   8  -3  10    0.36    5.91
  -8   3 -11    4.55    4.76
   8  -3  11   -6.70    7.67
  -8   3 -12   21.20    6.34
   8  -3  12   22.84    7.89
  -8   3 -13    3.08    4.62
   8  -3  13    2.74    7.40
  -8   3 -14   19.03    6.95
   8  -3  14   16.10    8.72
  -8   2  15   25.97    9.68
  -8   2  14   11.74    6.02
  -8   2  13   24.14    6.73
  -8   2  12   22.69    6.90
  -8   2  11    4.17    5.18
  -8   2  10   -0.63    4.80
  -8   2   9    2.11    4.84
  -8   2   8    7.01    5.44
  -8   2   7    3.47    5.03
  -8   2   6   68.40    9.51
  -8   2   5   -0.43    3.98
  -8   2   4   29.58    6.42
  -8   2   3    0.62    4.47
  -8   2   2  224.76   15.48
  -8   2   1   -5.30    4.72
  -8   2   0    9.21    4.96
  -8   2  -1   -7.36    4.72
  -8   2  -1   -7.89    6.61
  -8   2  -2   -6.93    4.58
  -8   2  -2   -5.32    6.13
  -8   2  -3    1.11    4.05
  -8   2  -3   -1.13    5.46
  -8   2  -4   17.20    6.02
  -8   2  -4   22.20    8.22
  -8   2  -5   12.18    5.30
  -8   2  -5   23.50    7.63
  -8   2  -6  186.61   13.89
   8  -2   6  191.96   14.64
  -8   2  -7    4.51    5.90
  -8   2  -7   11.47    7.19
   8  -2   7    6.25    6.09
  -8   2  -8   26.56    6.83
   8  -2   8   24.60    7.27
  -8   2  -9    8.74    5.11
   8  -2   9    6.35    5.48
  -8   2 -10   19.70    5.63
   8  -2  10   32.23    8.16
  -8   2 -11    3.94    4.23
   8  -2  11    9.00    7.73
  -8   2 -12   -1.41    4.53
   8  -2  12   16.21    7.59
  -8   2 -13    5.26    4.92
   8  -2  13   -4.34    6.64
  -8   2 -14   26.35    6.92
   8  -2  14    4.66    6.30
  -8   2 -15    0.37    4.66
   8  -2  15   -1.48    7.36
  -8   1  15    1.97    7.02
  -8   1  15   17.49    8.11
  -8   1  14    1.41    5.73
  -8   1  13    1.18    6.00
  -8   1  12    8.09    6.66
  -8   1  11    9.84    6.10
  -8   1  10   13.70    5.90
  -8   1   9   -1.57    5.13
  -8   1   8   28.91    7.22
  -8   1   7    6.35    6.05
  -8   1   6    1.08    4.65
  -8   1   5   -1.04    4.60
  -8   1   4  232.63   16.19
  -8   1   3    2.34    4.30
  -8   1   2   22.17    5.33
  -8   1   1    1.67    4.42
  -8   1   0   78.85    9.33
  -8   1  -2  134.26   11.92
  -8   1  -2   82.09   10.84
  -8   1  -3   11.50    4.82
  -8   1  -3   15.34    6.25
  -8   1  -4   -0.66    4.40
  -8   1  -4   -2.91    5.84
  -8   1  -5    3.27    5.02
  -8   1  -5   -2.01    6.34
  -8   1  -6   17.76    5.48
  -8   1  -6   10.55    5.90
  -8   1  -7    4.18    4.53
  -8   1  -7   12.32    8.13
   8  -1   7    9.17    6.30
  -8   1  -8   -4.04    3.91
  -8   1  -8    3.73    6.73
   8  -1   8    0.92    4.87
  -8   1  -9   17.88    6.07
  -8   1  -9   16.59    9.08
   8  -1   9   16.64    7.65
  -8   1 -10    7.84    5.86
   8  -1  10   11.92    6.49
  -8   1 -11   -0.77    4.27
   8  -1  11   -1.17    6.46
  -8   1 -12   11.26    5.79
   8  -1  12    1.10    6.21
  -8   1 -13    8.20    5.49
   8  -1  13    5.64    6.91
  -8   1 -14   12.32    4.93
   8  -1  14    5.50    7.51
  -8   1 -15    5.99    5.43
   8  -1  15   16.02    8.11
  -8   0  14   -4.56    6.24
  -8   0  14    6.11    6.46
  -8   0  13    3.21    6.66
  -8   0  12   19.73    8.23
  -8   0  11   16.07    7.47
  -8   0  10   14.48    6.58
  -8   0   9    4.48    5.71
  -8   0   8  104.12   11.81
  -8   0   7    7.44    6.75
  -8   0   6   28.53    7.45
  -8   0   5   -0.18    4.65
  -8   0   4    7.06    4.61
  -8   0   3   -1.33    4.28
  -8   0   2   98.15   11.08
  -8   0   1   20.88    5.85
  -8   0   0   29.90    6.71
  -8   0  -1   -4.41    5.52
  -8   0  -2   28.32    6.31
  -8   0  -2   21.60    7.65
  -8   0  -3   13.46    5.40
  -8   0  -3    7.08    5.57
  -8   0  -4    4.25    4.63
  -8   0  -4   -5.74    6.69
  -8   0  -5   16.11    6.03
  -8   0  -5    5.93    6.04
  -8   0  -6   12.42    6.00
  -8   0  -6   -2.50    7.28
  -8   0  -7    2.31    4.15
  -8   0  -7    1.31    6.45
  -8   0  -8   41.67    7.62
  -8   0  -8   19.81    8.45
   8   0   8   26.85    7.30
  -8   0  -9    4.40    5.10
  -8   0  -9   -1.42    6.87
   8   0   9   15.38    5.74
  -8   0 -10   18.61    5.08
  -8   0 -10   17.09    7.97
   8   0  10   22.54    7.90
  -8   0 -11    9.89    5.01
  -8   0 -11   12.03    7.38
   8   0  11   14.88    7.60
  -8   0 -12   13.01    5.78
   8   0  12    4.46    5.79
  -8   0 -13   -3.06    4.16
   8   0  13   -4.43    6.63
  -8   0 -14   21.38    6.49
   8   0  14   24.46    8.55
  -8   0 -15   -3.30    4.46
   8   0  15   -0.85    7.23
  -8   0 -16   -1.90    4.65
   8   0  16    0.83    8.48
  -8  -1  14    8.42    8.06
  -8  -1  14  -11.17    7.20
  -8  -1  13   -1.54    7.13
  -8  -1  12    9.96    7.73
  -8  -1  11    7.37    6.18
  -8  -1  10   58.44   10.43
  -8  -1   9   -1.50    5.38
  -8  -1   8    8.69    5.85
  -8  -1   7   -2.69    5.24
  -8  -1   6   71.47   10.19
  -8  -1   5   -5.50    4.72
  -8  -1   4   -5.09    5.07
  -8  -1   3    1.70    4.40
  -8  -1   2   96.00   10.86
  -8  -1   1    4.75    4.69
  -8  -1  -1    1.82    4.20
  -8  -1  -2   46.12    7.69
  -8  -1  -3   -5.36    5.86
  -8  -1  -3    1.26    6.28
  -8  -1  -4   94.52   12.63
  -8  -1  -4  115.83   11.72
  -8  -1  -5   14.92    4.91
  -8  -1  -5    1.77    7.97
  -8  -1  -6    3.17    4.29
  -8  -1  -6   -0.92    6.75
  -8  -1  -7    0.36    4.32
  -8  -1  -7    2.07    6.66
  -8  -1  -8   -0.47    3.96
  -8  -1  -8    6.21    8.08
  -8  -1  -9    3.63    4.40
  -8  -1  -9   -8.08    6.55
  -8  -1 -10    9.75    4.38
  -8  -1 -10    0.41    7.02
   8   1  10   16.54    6.84
  -8  -1 -11    2.04    4.21
  -8  -1 -11   -2.47    7.15
   8   1  11   -1.82    5.75
  -8  -1 -12   14.49    5.71
  -8  -1 -12    4.34    9.29
   8   1  12    4.57    7.64
  -8  -1 -13    9.68    4.48
  -8  -1 -13    7.41    7.64
   8   1  13   13.08    7.05
  -8  -1 -14   11.32    5.67
   8   1  14   13.67    7.74
  -8  -1 -15   10.02    5.60
   8   1  15    3.63    7.39
  -8  -1 -16    0.45    4.39
   8   1  16   19.42    8.93
  -8  -2  13    5.26    7.39
  -8  -2  13    3.75    6.03
  -8  -2  12   19.82    8.51
  -8  -2  11   16.10    7.04
  -8  -2  10   -1.03    6.00
  -8  -2   9   -0.47    6.69
  -8  -2   8   22.50    7.49
  -8  -2   7    1.83    5.27
  -8  -2   6   80.09   10.69
  -8  -2   5    8.87    5.45
  -8  -2   4    9.63    6.53
  -8  -2   3   21.71    6.89
  -8  -2   2   -0.90    5.55
  -8  -2   0    2.25    5.00
  -8  -2  -1   10.38    5.39
  -8  -2  -2  130.22   12.25
  -8  -2  -3   33.06    7.35
  -8  -2  -4   38.94    7.57
  -8  -2  -4   55.94   10.59
  -8  -2  -5    3.51    4.58
  -8  -2  -5    3.35    7.14
  -8  -2  -6   94.67   13.47
  -8  -2  -6   88.83   10.20
  -8  -2  -7   23.52    6.56
  -8  -2  -7   22.45    9.44
  -8  -2  -8   29.96    6.80
  -8  -2  -8   34.43   10.15
  -8  -2  -9   29.53    6.99
  -8  -2  -9   24.90    9.90
  -8  -2 -10   25.48    6.47
  -8  -2 -10   23.45    8.23
  -8  -2 -11   13.80    5.10
  -8  -2 -11    3.50    7.20
   8   2  12    4.46    5.98
  -8  -2 -12    6.38    5.06
  -8  -2 -12   11.57    7.86
   8   2  13   30.63    9.32
  -8  -2 -13   22.97    6.80
  -8  -2 -13   18.38    7.95
   8   2  14   -5.47    6.54
  -8  -2 -14    4.78    5.22
  -8  -2 -14    4.66    9.02
   8   2  15   41.54    9.78
  -8  -2 -15   27.41    6.27
  -8  -2 -15   26.06   11.26
   8   2  16    3.13    7.06
  -8  -2 -16    3.18    8.79
   8   2  17    9.36    8.36
  -8  -2 -17  -13.36    9.23
  -8  -3  12   70.68   10.87
  -8  -3  12   72.87   13.01
  -8  -3  11  -10.19    9.14
   8   3 -11    3.97    7.63
  -8  -3  10   30.38   11.10
   8   3 -10   21.01    8.58
  -8  -3   9   -1.04    7.47
   8   3  -9    6.29    6.03
  -8  -3   8    8.02    6.85
   8   3  -8    3.30    6.22
  -8  -3   7   14.92    7.25
   8   3  -7   -3.20    5.78
  -8  -3   6   11.03    6.88
   8   3  -6   -6.72    5.64
  -8  -3   5   12.87    7.15
   8   3  -5   -1.47    4.79
  -8  -3   4  202.95   17.00
   8   3  -4  203.27   12.78
  -8  -3   3    4.62    6.18
  -8  -3   2   12.41    6.52
  -8  -3   1   10.09    6.46
  -8  -3   0    9.89    5.52
  -8  -3  -1    6.61    5.04
  -8  -3  -2    0.26    4.93
  -8  -3  -3    5.64    4.80
  -8  -3  -4   50.80    8.75
  -8  -3  -5   72.86   12.15
  -8  -3  -5   70.74   10.42
  -8  -3  -6   24.23    7.82
  -8  -3  -6   24.72    7.78
  -8  -3  -7   -3.84    5.38
  -8  -3  -7    2.65    6.65
  -8  -3  -8   -4.24    4.36
  -8  -3  -8   -4.48    9.00
  -8  -3  -9    3.42    4.60
  -8  -3  -9   15.05    8.39
  -8  -3 -10   -2.14    4.52
  -8  -3 -10   -0.67    7.25
  -8  -3 -11    9.39    5.86
  -8  -3 -11   -9.08    7.85
  -8  -3 -12    7.57    4.05
  -8  -3 -12    2.10    7.57
  -8  -3 -13   10.11    5.74
  -8  -3 -13   13.42    8.56
  -8  -3 -14   15.23    5.93
  -8  -3 -14    6.73    7.68
   8   3  15   -5.02    6.65
  -8  -3 -15    1.82    4.51
  -8  -3 -16    4.25    8.09
   8   3  16    6.58    6.61
  -8  -4  11   -8.00    6.25
  -8  -4  11    7.07    8.78
   8   4 -11    2.75    7.29
  -8  -4  10   17.46    6.74
  -8  -4  10   31.46   11.66
   8   4 -10   22.86    9.18
  -8  -4   9   14.91    9.21
   8   4  -9   10.46    7.30
  -8  -4   8    1.25    8.54
   8   4  -8   24.94    8.25
  -8  -4   7   -4.69    7.06
   8   4  -7   -1.87    5.48
  -8  -4   6   -2.11    6.31
   8   4  -6   -5.41    5.55
  -8  -4   5    5.16    6.77
   8   4  -5   -2.07    4.81
  -8  -4   4   16.48    8.05
   8   4  -4   27.05    6.28
  -8  -4   3    0.73    5.83
   8   4  -3    5.32    4.42
   8   4  -2    5.14    3.95
  -8  -4   1   -2.70    5.46
   8   4  -1    0.31    4.01
  -8  -4   0   50.39    9.79
  -8  -4  -1    1.62    5.54
  -8  -4  -2   -7.04    6.33
  -8  -4  -3   20.90    7.20
  -8  -4  -4   12.94    6.61
  -8  -4  -5   20.31    6.44
  -8  -4  -6    2.23    6.48
  -8  -4  -7   27.91    9.26
  -8  -4  -7   11.05    5.21
  -8  -4  -8   22.36   10.01
  -8  -4  -8   13.78    6.57
  -8  -4  -9    9.44    7.97
  -8  -4  -9    9.92    5.68
  -8  -4 -10    8.69    8.49
  -8  -4 -10    6.46    5.39
  -8  -4 -11   -0.71    8.10
  -8  -4 -11   14.72    5.77
  -8  -4 -12    9.31    8.23
  -8  -4 -12    9.08    5.97
  -8  -4 -13   15.35    9.91
  -8  -4 -13   -0.87    4.40
  -8  -4 -14   10.38    5.42
  -8  -4 -16    0.02   10.00
  -8  -5   9    7.05    5.81
  -8  -5   9   18.57    8.61
   8   5  -9    8.83    8.43
  -8  -5   8   26.73   10.09
   8   5  -8   11.08    7.25
  -8  -5   7    3.09    9.47
   8   5  -7    1.78    5.39
  -8  -5   6    7.50    9.07
   8   5  -6   -5.06    5.40
  -8  -5   5   13.64    8.14
   8   5  -5    9.26    5.65
  -8  -5   4   23.79   10.40
   8   5  -4   32.21    7.41
   8   5  -3   15.43    5.27
  -8  -5   2   17.29    9.41
   8   5  -2    8.52    4.64
  -8  -5   1    0.79    6.97
   8   5  -1    6.36    5.18
  -8  -5   0    6.02    6.14
   8   5   0    0.91    4.86
   8   5   1   37.55    7.47
  -8  -5  -1   39.74    8.92
  -8  -5  -2    2.27    5.82
   8   5   2   -4.78    4.60
  -8  -5  -3   19.43    6.98
  -8  -5  -4   23.50    7.38
  -8  -5  -5   11.00    6.84
  -8  -5  -6    5.09    6.24
  -8  -5  -7   -5.54    4.96
  -8  -5  -8    3.64    5.81
  -8  -5  -8    8.90    7.42
  -8  -5  -9   -1.21    5.51
  -8  -5  -9    6.28    8.62
  -8  -5 -10    8.08    5.22
  -8  -5 -11   12.58    5.41
  -8  -5 -11   27.46   13.13
  -8  -5 -12   11.03    5.73
  -8  -5 -12   -8.69    8.66
  -8  -5 -13   64.00    9.56
  -8  -5 -13   49.94   12.64
  -8  -5 -14    3.13   10.05
  -8  -5 -15   33.88   13.69
  -8  -6   7    0.17    8.15
   8   6  -7   -0.48    6.64
  -8  -6   6   20.53   10.71
   8   6  -6   18.04    7.78
  -8  -6   5   16.54   11.38
   8   6  -5   12.71    6.53
  -8  -6   4    0.24    7.68
   8   6  -4    6.13    6.31
  -8  -6   3    0.77    8.67
   8   6  -3   -0.04    5.51
  -8  -6   2    2.71    8.29
   8   6  -2    2.06    4.94
  -8  -6   1   -2.46    7.17
   8   6  -1   -4.56    5.48
  -8  -6   0   -1.98    7.99
   8   6   0    6.43    6.01
  -8  -6  -1   -3.07    7.96
   8   6   1   18.57    6.59
  -8  -6  -2    8.32    7.99
   8   6   2    0.58    5.00
  -8  -6  -3   19.29    9.02
   8   6   3   18.72    6.87
  -8  -6  -4   10.96    7.89
  -8  -6  -5    6.74    6.88
  -8  -6  -6    5.65    6.45
  -8  -6  -7    2.78    6.26
  -8  -6  -8   17.17    7.26
  -8  -6  -9   -5.82    5.77
  -8  -6 -10    5.10    5.90
  -8  -6 -11  120.55   17.78
  -8  -6 -11  113.58   12.90
  -8  -6 -12   22.88    8.28
  -8  -6 -12   36.45   12.26
  -8  -6 -13  123.44   13.10
  -8  -6 -13  111.96   17.48
  -8  -6 -14    2.97    9.54
   8   7  -5   15.28    8.14
  -8  -7   5    4.49    9.96
   8   7  -4    9.63    7.06
   8   7  -3   -0.76    5.66
  -8  -7   3   10.44    8.52
   8   7  -2    9.86    6.68
  -8  -7   2   13.55    7.85
   8   7  -1   17.49    7.14
  -8  -7   1   27.17   10.11
   8   7   0    5.63    6.29
  -8  -7   0   -0.99    7.66
   8   7   1   -1.84    6.19
  -8  -7  -1    3.97    7.46
   8   7   2   15.43    6.77
  -8  -7  -2    3.29    7.23
   8   7   3   27.54    9.08
  -8  -7  -3    5.91    6.82
   8   7   4    3.38    5.73
  -8  -7  -4   -1.52    7.29
  -8  -7  -5   37.49   10.89
  -8  -7  -6   19.51    7.51
  -8  -7  -7   18.96    7.41
  -8  -7  -8    3.71    6.40
  -8  -7  -9   46.44   10.06
  -8  -7 -10    6.59    6.42
  -8  -7 -11   64.34   10.66
  -8  -7 -12   -3.71    6.74
   8   8   0    9.08    8.27
  -8  -8   0   10.01    9.31
   8   8   1    0.54    7.11
  -8  -8  -1    4.46    9.15
   8   8   2   -9.60    9.68
  -8  -8  -2   -7.77    8.29
   8   8   3   -3.48    7.12
  -8  -8  -3  -12.57   10.62
  -8  -8  -4  -10.11    9.27
  -8  -8  -5    6.04    7.97
  -8  -8  -6   -7.50    9.49
  -8  -8  -7   -2.79    9.13
  -8  -8  -8  -11.00    9.81
  -9   6   5    5.19    5.93
  -9   6   4    6.40    5.45
  -9   6   3   -4.63    6.19
  -9   6   2   12.77    7.14
  -9   6   1    1.34    4.97
  -9   6   0    3.26    4.56
  -9   6  -1    1.86    4.73
  -9   6  -2    5.83    5.89
  -9   5   8   -5.12    5.59
  -9   5   7    3.93    4.95
  -9   5   6   -0.39    5.69
  -9   5   5    0.61    4.86
  -9   5   4    7.42    5.04
  -9   5   3    1.02    4.86
  -9   5   2    4.97    6.25
  -9   5   1   -3.29    5.78
  -9   5   0   65.03    9.79
  -9   5  -1    3.06    4.82
  -9   5  -2   -5.39    6.11
  -9   5  -3    7.92    6.07
  -9   5  -4   -9.97    7.00
  -9   5  -5   10.94    6.00
  -9   5  -6    1.48    5.72
  -9   4  10    8.37    6.29
  -9   4   9    6.71    6.92
  -9   4   8   10.93    5.96
  -9   4   7   -0.19    5.32
  -9   4   6   10.71    6.76
  -9   4   5   -5.08    5.35
  -9   4   4   -1.36    4.60
  -9   4   3   -2.83    4.50
  -9   4   2   51.92    9.67
  -9   4   1   16.27    5.83
  -9   4   0   -6.09    4.66
  -9   4  -1    4.96    4.88
  -9   4  -2   11.85    6.13
  -9   4  -4   17.81    6.24
  -9   4  -5   12.12    6.17
  -9   4  -6    2.34    6.81
  -9   4  -6    6.72    5.95
   9  -4   7   13.99   10.87
  -9   4  -7   -7.16    5.01
  -9   4  -7   -8.01    9.62
  -9   4  -8   15.38    6.37
  -9   4  -8   27.07   10.24
   9  -4   8   12.73    7.38
  -9   4  -9   -0.36    5.99
  -9   4  -9   -3.17    7.70
   9  -4   9    4.56    6.19
  -9   3  11    5.61    6.39
  -9   3  10    0.08    5.67
  -9   3   9   -7.70    6.20
  -9   3   8   17.11    8.24
  -9   3   7    6.66    5.24
  -9   3   6   10.77    6.25
  -9   3   5  -11.37    6.33
  -9   3   4  153.75   14.12
  -9   3   3   -0.08    4.95
  -9   3   2   -2.76    4.58
  -9   3   1   -1.03    4.30
  -9   3   0   49.58    8.69
  -9   3  -1   -6.52    5.37
  -9   3  -2   29.77    7.60
  -9   3  -3   -2.60    4.33
  -9   3  -3    4.71    6.29
  -9   3  -4   12.12    5.46
  -9   3  -4   20.33    8.80
  -9   3  -5   18.64    5.66
  -9   3  -5   24.22   10.60
  -9   3  -6   -4.70    5.77
  -9   3  -6    3.38    7.52
  -9   3  -7    7.74    5.07
  -9   3  -7   13.45    9.54
   9  -3   7   13.39    7.26
  -9   3  -8    6.76    5.56
  -9   3  -8    3.21    7.58
   9  -3   8   17.93    8.07
  -9   3  -9   -1.93    5.26
  -9   3  -9   -4.46    8.86
   9  -3   9    2.53    6.07
  -9   3 -10    5.02    6.76
  -9   3 -10    1.65    9.18
   9  -3  10    0.02    6.19
  -9   3 -11    3.59    5.01
   9  -3  11   -2.58    6.75
  -9   2  12   -4.30    6.06
  -9   2  11    1.36    5.83
  -9   2  10    2.95    5.28
  -9   2   9   -5.87    5.40
  -9   2   8    4.73    6.03
  -9   2   7    2.41    5.07
  -9   2   6  103.55   12.73
  -9   2   5    1.80    5.26
  -9   2   4  149.28   14.11
  -9   2   3   10.20    5.92
  -9   2   2    6.95    4.77
  -9   2   1    2.80    4.71
  -9   2   0    6.72    4.61
  -9   2  -1   -4.52    5.26
  -9   2  -2    8.59    5.48
  -9   2  -2   12.66    6.89
  -9   2  -3    3.14    5.53
  -9   2  -3    7.85    7.93
  -9   2  -4    6.07    4.87
  -9   2  -4    7.14    6.82
  -9   2  -5    3.43    5.38
  -9   2  -5   -5.64    7.30
  -9   2  -6  236.47   17.13
  -9   2  -6  174.46   17.33
  -9   2  -7   15.92    6.61
  -9   2  -7   14.42    7.95
  -9   2  -8   35.14    7.93
  -9   2  -8   11.70    9.13
   9  -2   8   20.12    7.51
  -9   2  -9    1.38    4.56
   9  -2   9    0.34    5.64
  -9   2 -10   -7.03    5.66
  -9   2 -10    1.54    7.76
   9  -2  10    0.01    5.96
  -9   2 -11   -1.94    6.65
  -9   2 -11  -13.42    9.82
   9  -2  11  -11.36    6.94
  -9   2 -12    7.35    5.89
   9  -2  12   -1.08    7.15
  -9   1  12   -1.74    5.98
  -9   1  11    5.99    5.40
  -9   1  10   -0.04    6.09
  -9   1   9   -6.05    6.11
  -9   1   8   51.61    8.59
  -9   1   7    9.53    5.09
  -9   1   6   -1.99    4.95
  -9   1   5   -3.36    4.40
  -9   1   4   14.28    6.82
  -9   1   3   -6.48    6.09
  -9   1   2    3.53    4.87
  -9   1   1   -2.62    5.30
  -9   1   0   99.17   11.54
  -9   1  -2   35.32    7.91
  -9   1  -3   -1.36    5.04
  -9   1  -3    1.67    6.36
  -9   1  -4   76.05    9.92
  -9   1  -4   50.76   10.29
  -9   1  -5   44.58    8.80
  -9   1  -5   31.33    8.96
  -9   1  -6   -0.11    5.46
  -9   1  -6  -14.97    7.92
  -9   1  -7    9.84    5.60
  -9   1  -7   10.76    7.89
  -9   1  -8   84.26   10.56
  -9   1  -8   41.64   11.12
  -9   1  -9    1.21    4.91
  -9   1  -9   12.12    9.76
   9  -1   9    5.79    6.47
  -9   1 -10    2.22    5.02
  -9   1 -10   -0.66    7.69
   9  -1  10   -1.37    5.59
  -9   1 -11   -0.14    5.76
  -9   1 -11   13.01    8.23
   9  -1  11    2.67    7.09
  -9   1 -12    5.74    6.38
  -9   1 -12    4.30    8.09
   9  -1  12   -3.01    7.27
  -9   1 -13    6.61    5.06
  -9   1 -13    9.79    9.42
   9  -1  13   12.81    7.94
  -9   0  12   -1.11    6.07
  -9   0  11   13.45    7.47
  -9   0  10   15.77    7.17
  -9   0   9    5.20    6.49
  -9   0   8   -1.96    5.46
  -9   0   7    9.99    5.54
  -9   0   6   53.17   10.75
  -9   0   5    0.46    5.42
  -9   0   4    0.06    6.32
  -9   0   3   -0.03    5.13
  -9   0   2   64.05    9.50
  -9   0   1    4.21    4.64
  -9   0   0    7.83    6.33
  -9   0  -1    4.38    5.91
  -9   0  -2    1.07    4.62
  -9   0  -3    0.36    4.68
  -9   0  -3    8.86    7.00
  -9   0  -4    3.14    4.93
  -9   0  -4    7.12    7.15
  -9   0  -5   -0.53    5.08
  -9   0  -5   -1.97    6.84
  -9   0  -6    3.61    4.21
  -9   0  -6    2.99    7.27
  -9   0  -7   -2.36    4.78
  -9   0  -7    3.53    7.57
  -9   0  -8    2.36    5.47
  -9   0  -8    4.31    7.40
  -9   0  -9   18.71    6.35
  -9   0  -9   18.56    8.83
  -9   0 -10   -2.78    4.78
  -9   0 -10    2.97    7.58
  -9   0 -11    9.69    5.30
  -9   0 -11   20.62    8.94
   9   0  11    9.65    6.16
  -9   0 -12    6.04    5.22
  -9   0 -12   -5.76    9.41
   9   0  12   -8.80    7.55
  -9   0 -13    6.60    6.36
  -9   0 -13    9.12    9.20
   9   0  13    6.77    7.45
  -9   0 -14    4.91    6.16
  -9   0 -14  -15.47   10.25
   9   0  14    1.23    7.35
  -9  -1  11    1.74    7.68
  -9  -1  10    7.53    6.54
  -9  -1   9   21.62    8.15
  -9  -1   8    6.72    6.44
  -9  -1   7   -2.70    5.44
  -9  -1   6   46.73    9.12
  -9  -1   5   -6.44    6.23
  -9  -1   4    3.93    5.49
  -9  -1   3   10.34    5.32
  -9  -1   2   31.54    7.63
  -9  -1   1   -3.55    5.78
  -9  -1  -1   -7.73    5.24
  -9  -1  -2    5.84    4.69
  -9  -1  -3   -2.89    6.00
  -9  -1  -4   18.19    7.16
  -9  -1  -4    5.37    6.66
  -9  -1  -5    4.68    5.08
  -9  -1  -5    0.40    6.92
  -9  -1  -6   38.46    9.81
  -9  -1  -6   44.83    8.69
  -9  -1  -7   -0.43    7.73
  -9  -1  -7    9.91    6.24
  -9  -1  -8    5.96    8.34
  -9  -1  -8    3.35    4.89
  -9  -1  -9   -5.72    8.31
  -9  -1  -9   -3.94    4.79
  -9  -1 -10   21.64    9.87
  -9  -1 -10    7.72    5.25
  -9  -1 -11    4.55    7.59
  -9  -1 -11    3.51    5.96
  -9  -1 -12    4.79    9.04
  -9  -1 -12    1.74    5.33
  -9  -1 -13    7.07    9.07
  -9  -1 -13   12.32    6.54
   9   1  13   17.99    7.55
  -9  -1 -14   -1.55    8.33
  -9  -1 -14  -15.13    7.19
   9   1  14   12.94    9.39
  -9  -2  10  -12.71    8.96
  -9  -2   9    1.20    7.49
  -9  -2   8   21.03    9.48
  -9  -2   7   -6.91    8.22
  -9  -2   6    2.67    6.91
  -9  -2   5   -2.68    6.39
  -9  -2   4    8.05    5.40
  -9  -2   3   13.12    6.07
  -9  -2   2   79.11   11.16
  -9  -2   0    4.50    6.95
  -9  -2  -1    0.44    5.51
  -9  -2  -2   19.23    7.04
  -9  -2  -3   10.26    5.36
  -9  -2  -4   11.78    5.45
  -9  -2  -5    4.98    4.71
  -9  -2  -5   11.71    7.78
  -9  -2  -6   39.58    9.95
  -9  -2  -6   46.13    8.76
  -9  -2  -7   23.83    8.06
  -9  -2  -7   16.08    9.55
  -9  -2  -8   -0.88    5.03
  -9  -2  -8    5.53    7.92
  -9  -2  -9    5.20    6.14
  -9  -2  -9   -7.09    8.21
  -9  -2 -10   -5.49    5.18
  -9  -2 -10    4.05    7.90
  -9  -2 -11    1.67    5.22
  -9  -2 -11    1.53    9.87
  -9  -2 -12   21.28    7.00
  -9  -2 -12   12.46   10.16
  -9  -2 -13   24.84    7.39
  -9  -2 -13   27.64   12.07
  -9  -2 -14    3.57    5.30
  -9  -2 -14   -5.19    9.44
  -9  -3   9   16.52    8.84
  -9  -3   8    5.20    7.79
  -9  -3   7    1.35    6.85
  -9  -3   6    1.50    6.12
  -9  -3   5   12.22    8.01
  -9  -3   4  206.20   18.38
  -9  -3   3   38.37    8.90
  -9  -3   2    7.66    5.49
  -9  -3   1   18.93    7.20
  -9  -3   0    7.75    6.42
  -9  -3  -1    8.55    6.16
  -9  -3  -2   33.72    8.14
  -9  -3  -3   11.72    5.91
  -9  -3  -4   35.84    7.66
  -9  -3  -5   29.91    7.03
  -9  -3  -6    4.31    5.99
  -9  -3  -7   10.58    6.13
  -9  -3  -7    6.55    9.27
  -9  -3  -8   -3.49    5.39
  -9  -3  -8   -0.91    7.27
  -9  -3  -9   23.52    7.29
  -9  -3  -9    3.21    8.23
  -9  -3 -10    5.24    5.32
  -9  -3 -10    6.10    9.49
  -9  -3 -11   -2.83    5.94
  -9  -3 -11    8.22   10.52
  -9  -3 -12    7.99    6.09
  -9  -3 -12    3.80    8.86
  -9  -3 -13   29.28    7.74
  -9  -3 -13    5.23    9.95
  -9  -3 -14    2.92    5.59
  -9  -3 -14   -0.16    9.10
  -9  -4   8    4.43    8.43
  -9  -4   7   13.13    8.32
  -9  -4   6    5.35    7.26
  -9  -4   5    2.47    7.55
  -9  -4   4   24.98    9.86
  -9  -4   3   -0.12    7.20
  -9  -4   1   45.02    9.90
  -9  -4   0   -2.18    6.74
  -9  -4  -1   -5.40    6.49
  -9  -4  -2    4.11    6.34
  -9  -4  -3    4.65    6.23
  -9  -4  -4   -2.17    5.72
  -9  -4  -5   12.64    6.78
  -9  -4  -6    2.29    5.42
  -9  -4  -7   12.82    6.09
  -9  -4  -8   16.38    7.29
  -9  -4  -8   17.78   10.86
  -9  -4  -9   25.33    7.36
  -9  -4  -9   28.46   10.34
  -9  -4 -10   -2.15    6.00
  -9  -4 -10   10.29    9.03
  -9  -4 -11   -0.74    5.87
  -9  -4 -11   12.80   10.50
  -9  -4 -12    4.81    5.09
  -9  -4 -12   26.18   12.44
  -9  -4 -13    3.79    5.59
  -9  -4 -13   23.61   11.28
  -9  -5   6    3.20    8.20
  -9  -5   5   -3.61    7.56
  -9  -5   4    1.69    7.12
  -9  -5   2    7.70    7.74
  -9  -5   1    7.01    7.40
  -9  -5   0   15.60    9.16
  -9  -5  -1    2.74    6.72
  -9  -5  -2    5.19    6.64
  -9  -5  -3   10.48    8.46
  -9  -5  -4   -4.69    6.15
  -9  -5  -5   50.22   10.34
  -9  -5  -6   14.75    6.15
  -9  -5  -7    8.17    6.08
  -9  -5  -8    2.40    6.38
  -9  -5  -9   12.39    7.09
  -9  -5 -10    1.00    5.70
  -9  -5 -10    6.07    9.38
  -9  -5 -11   -2.36    5.78
  -9  -5 -11   27.31   11.87
  -9  -5 -12   -5.35    5.67
  -9  -5 -12   12.92   10.18
  -9  -6   3    0.02    8.10
  -9  -6   2    3.27    8.89
  -9  -6   1   21.05   10.73
  -9  -6   0    3.73    7.42
  -9  -6  -1   -2.51    7.61
  -9  -6  -2    9.46    7.44
  -9  -6  -3    4.89    8.89
  -9  -6  -4   37.19    9.62
  -9  -6  -5   34.41   10.55
  -9  -6  -6    7.39    6.79
  -9  -6  -7   12.69    9.20
  -9  -6  -8    0.94    6.63
  -9  -6  -9   -0.64    6.79
  -9  -6 -10    8.99    6.24
  -9  -7  -3   17.15    7.56
  -9  -7  -4    8.31    6.92
 -10   4   4   16.36    6.37
 -10   4   3   -1.17    5.13
 -10   4   2   20.19    7.07
 -10   4   1    1.57    5.87
 -10   4   0    0.31    4.90
 -10   4  -1   -2.33    6.04
 -10   4  -2   26.26    8.82
 -10   3   6   16.13    8.10
 -10   3   5   -0.24    5.86
 -10   3   4   43.63    9.74
 -10   3   3   -8.41    6.51
 -10   3   2   46.75    9.58
 -10   3   1   -1.73    4.85
 -10   3   0   13.60    6.95
 -10   3  -1    0.65    5.68
 -10   3  -3    0.20    5.46
 -10   3  -4    2.87    5.43
 -10   3  -5    9.05    6.67
 -10   3  -6    7.24    6.48
 -10   2   7    1.31    6.55
 -10   2   6   38.31    8.95
 -10   2   5    3.28    5.58
 -10   2   4   -0.35    5.12
 -10   2   3   -7.98    6.24
 -10   2   2   63.71   10.47
 -10   2   1   -2.00    4.94
 -10   2   0    8.96    6.69
 -10   2  -1    9.94    6.23
 -10   2  -2    5.26    6.25
 -10   2  -3    3.33    6.46
 -10   2  -4   11.85    8.43
 -10   2  -4    2.65    5.72
 -10   2  -5    6.84    7.12
 -10   2  -5   -1.96    5.68
 -10   2  -6  118.64   15.89
 -10   2  -6  170.82   15.60
 -10   2  -7   27.65   10.75
 -10   2  -7   28.97    8.71
 -10   2  -8   17.03   10.66
 -10   2  -8   29.69    7.77
 -10   1   8   24.76    8.06
 -10   1   7   -1.74    5.72
 -10   1   6   29.87    8.62
 -10   1   5   -1.70    6.96
 -10   1   4   64.50   10.82
 -10   1   3    1.97    5.55
 -10   1   2   24.18    8.03
 -10   1   1   -4.01    5.57
 -10   1   0   46.03   10.42
 -10   1  -2   43.17    8.88
 -10   1  -3    9.88    5.42
 -10   1  -4   38.40    9.67
 -10   1  -4   51.54    9.70
 -10   1  -5   20.95   10.42
 -10   1  -5   -3.14    6.02
 -10   1  -6   57.22   13.23
 -10   1  -6   53.40    9.09
 -10   1  -7    4.51   10.86
 -10   1  -7   14.11    6.35
 -10   1  -8   53.60   13.00
 -10   1  -8   42.56    9.27
 -10   1  -9    6.16    9.98
 -10   1  -9   11.80    6.17
 -10   0   8    1.53    6.22
 -10   0   7   -1.88    5.68
 -10   0   6    8.32    6.69
 -10   0   5   16.45    7.74
 -10   0   4    5.56    6.41
 -10   0   3    4.84    5.91
 -10   0   2   50.83   10.76
 -10   0   1    4.93    5.20
 -10   0   0    7.32    6.48
 -10   0  -1   -9.53    7.07
 -10   0  -2    3.95    6.02
 -10   0  -3    6.12    6.09
 -10   0  -4   54.05    9.76
 -10   0  -5    1.52    6.07
 -10   0  -5   14.62    7.60
 -10   0  -6   12.32    6.13
 -10   0  -6    0.71    8.53
 -10   0  -7    2.02    5.76
 -10   0  -7   -2.08    8.30
 -10   0  -8    0.85    5.28
 -10   0  -8   -3.08    8.69
 -10   0  -9    4.14    6.33
 -10   0  -9   -1.05    9.79
 -10   0 -10   19.91    7.92
 -10   0 -10   21.94   12.21
 -10  -1   7   -4.81    6.19
 -10  -1   6   -6.07    6.34
 -10  -1   5    6.52    7.83
 -10  -1   4   14.09    5.69
 -10  -1   3    3.22    5.64
 -10  -1   2   34.11    8.62
 -10  -1   1   -0.45    5.40
 -10  -1  -1   21.22    7.52
 -10  -1  -2   42.36    9.39
 -10  -1  -3    5.49    5.42
 -10  -1  -4   20.41    6.70
 -10  -1  -5    6.29    6.89
 -10  -1  -6    4.98    5.92
 -10  -1  -6   12.45    9.18
 -10  -1  -7    4.21    5.97
 -10  -1  -7   21.23   10.38
 -10  -1  -8    3.22    5.67
 -10  -1  -8    0.17    8.98
 -10  -1  -9    0.99    5.33
 -10  -1  -9    4.09    8.36
 -10  -1 -10   -1.33    5.73
 -10  -1 -10   -2.33    9.96
 -10  -2   6   -5.40    6.71
 -10  -2   5    6.78    7.25
 -10  -2   4   -4.40    6.57
 -10  -2   3   15.67    8.78
 -10  -2   2   45.56    9.90
 -10  -2   0   10.75    6.54
 -10  -2  -1    2.49    6.82
 -10  -2  -2   16.80    7.33
 -10  -2  -3   16.28    6.77
 -10  -2  -4    0.01    5.70
 -10  -2  -5   19.21    6.38
 -10  -2  -6    8.41    6.20
 -10  -2  -7    6.69    5.68
 -10  -2  -7   -5.35    8.30
 -10  -2  -8   11.45    6.69
 -10  -2  -8   -5.40    9.58
 -10  -2  -9   10.48    6.77
 -10  -2  -9   -5.04    9.53
 -10  -2 -10    9.90    5.98
 -10  -2 -10   20.21   11.44
 -10  -3   5    3.06    8.43
 -10  -3   4   73.84   12.85
 -10  -3   3   53.01   11.43
 -10  -3   2   50.22   11.32
 -10  -3   1   12.95    8.68
 -10  -3   0   51.98   11.40
 -10  -3  -1    2.45    7.77
 -10  -3  -2    3.22    7.38
 -10  -3  -3   13.16    7.85
 -10  -3  -4   17.85    8.07
 -10  -3  -5    4.19    6.27
 -10  -3  -6   13.30    7.15
 -10  -3  -7    1.03    6.83
 -10  -3  -8   -7.60   10.00
 -10  -3  -8    3.65    5.82
 -10  -3  -9   18.85    9.93
 -10  -3  -9    0.70    7.43
 -10  -4   3  -11.19    8.84
 -10  -4   1   16.09    7.72
 -10  -4   0   -2.75    6.19
 -10  -4  -1    0.42    6.07
 -10  -4  -2    2.58    6.46
 -10  -4  -3    0.26    6.29
 -10  -4  -4   -4.98    7.60
 -10  -4  -5   -3.46    6.99
 -10  -4  -6    1.04    6.56
 -10  -4  -7   15.00    6.98
 -10  -4  -8    9.93    6.83
 -10  -5  -2    9.29    9.45
 -10  -5  -3   21.67    8.66
 -10  -5  -4   15.28    7.77
   0   0   0    0.00    0.00


TITL Ros1b in P-1
REM P-1 (#2 in standard setting)
CELL 0.71075   8.399784   9.140576  18.206604  78.4387  86.8104  88.1185
ZERR    2.00   0.000521   0.000740   0.001299   0.0064   0.0054   0.0058
LATT  1
SFAC C H B N O
UNIT 20.00 68.00 20.00 4.00 40.00
TREF
HKLF 4
END
_computing_structure_solution     'SHELXT 2018/2 (Sheldrick, 2018)'
_computing_structure_solution     'SHELXT 2018/2 (Sheldrick, 2018)'
_computing_structure_solution     'SHELXT 2018/2 (Sheldrick, 2018)'
;
_shelx_hkl_checksum                26256
_olex2_diffrn_ambient_temperature_device  'Oxford Cryosystems'
_olex2_submission_original_sample_id  MAB/BMC3
_olex2_submission_special_instructions  'No special instructions were received'
_oxdiff_exptl_absorpt_empirical_details
;
Empirical correction (ABSPACK) includes:
- Absorption correction using spherical harmonics
- Frame scaling
- Detector area scaling
;
_oxdiff_exptl_absorpt_empirical_full_max  1.745
_oxdiff_exptl_absorpt_empirical_full_min  0.649
