# Supplementary material for: Pentaborate(1-) Salts and a Tetraborate(2-) Salt Derived from C2- or C3-Linked Bis(alkylammonium) Dications: Synthesis, Characterization, and Structural (XRD) Studies
Source: Molecules. 2019 Dec 23;25(1):53. doi: 10.3390/molecules25010053 (PMC6982793; doi:10.3390/molecules25010053)
Supplement: Supplementary file 1 [file molecules-25-00053-s001.zip › MAB3.cif]

data_MAB3

#2012ncs0234

_audit_creation_date               2019-11-25
_audit_creation_method
;
Olex2 1.3
(compiled 2019.09.11 svn.r3662 for OlexSys, GUI svn.r5938)
;
_shelx_SHELXL_version_number       '2018/3'
loop_
  _audit_author_name
  _audit_author_email
  _audit_author_address
 'Beckett, M.A.' ''
;
Bangor University
School of Chemistry
Bangor
LL57 2UW
UK
;
 'Horton, P.N.' pnh@soton.ac.uk
;
University of Southampton
Chemistry
Southampton
SO17 1BJ
UK
;

_audit_contact_author_address      ?
_audit_contact_author_email        ?
_audit_contact_author_name         ''
_audit_contact_author_phone        ?
_publ_contact_author_id_orcid      ?
_publ_section_references
;
Dolomanov, O.V., Bourhis, L.J., Gildea, R.J, Howard, J.A.K. & Puschmann, H.
 (2009), J. Appl. Cryst. 42, 339-341.

Sheldrick, G.M. (2015). Acta Cryst. A71, 3-8.

Sheldrick, G.M. (2015). Acta Cryst. C71, 3-8.
;
_chemical_name_common              ?
_chemical_name_systematic          ?
_chemical_formula_moiety           'B5 H4 O10, C4 H12 N'
_chemical_formula_sum              'C4 H16 B5 N O10'
_chemical_formula_weight           292.23
_chemical_melting_point            ?
_chemical_oxdiff_formula           'C4 H16 B5 N O10'
loop_
  _atom_type_symbol
  _atom_type_description
  _atom_type_scat_dispersion_real
  _atom_type_scat_dispersion_imag
  _atom_type_scat_source
 'C' 'C' 0.0033 0.0016 'International Tables Vol C Tables 4.2.6.8 and 6.1.1.4'
 'H' 'H' 0.0000 0.0000 'International Tables Vol C Tables 4.2.6.8 and 6.1.1.4'
 'B' 'B' 0.0013 0.0007 'International Tables Vol C Tables 4.2.6.8 and 6.1.1.4'
 'N' 'N' 0.0061 0.0033 'International Tables Vol C Tables 4.2.6.8 and 6.1.1.4'
 'O' 'O' 0.0106 0.0060 'International Tables Vol C Tables 4.2.6.8 and 6.1.1.4'

_shelx_space_group_comment
;
The symmetry employed for this shelxl refinement is uniquely defined
by the following loop, which should always be used as a source of
symmetry information in preference to the above space-group names.
They are only intended as comments.
;
_space_group_crystal_system        'triclinic'
_space_group_IT_number             2
_space_group_name_H-M_alt          'P -1'
_space_group_name_Hall             '-P 1'
loop_
  _space_group_symop_operation_xyz
 'x, y, z'
 '-x, -y, -z'

_cell_length_a                     8.3793(3)
_cell_length_b                     8.8187(4)
_cell_length_c                     10.0877(4)
_cell_angle_alpha                  80.961(3)
_cell_angle_beta                   76.057(3)
_cell_angle_gamma                  68.269(4)
_cell_volume                       670.14(5)
_cell_formula_units_Z              2
_cell_measurement_reflns_used      5725
_cell_measurement_temperature      100(2)
_cell_measurement_theta_max        31.1580
_cell_measurement_theta_min        2.9360
_shelx_estimated_absorpt_T_max     0.994
_shelx_estimated_absorpt_T_min     0.981
_exptl_absorpt_coefficient_mu      0.129
_exptl_absorpt_correction_T_max    1.00000
_exptl_absorpt_correction_T_min    0.77530
_exptl_absorpt_correction_type     multi-scan
_exptl_absorpt_process_details    
 'CrysAlisPro 1.171.40.53 (Rigaku Oxford Diffraction, 2019) Empirical absorption correction using spherical harmonics, implemented in SCALE3 ABSPACK scaling algorithm.'
_exptl_absorpt_special_details     ?
_exptl_crystal_colour              colourless
_exptl_crystal_colour_primary      colourless
_exptl_crystal_density_diffrn      1.448
_exptl_crystal_density_meas        ?
_exptl_crystal_density_method      ?
_exptl_crystal_description         slab
_exptl_crystal_F_000               304
_exptl_crystal_recrystallization_method 
 'The material was recrystallised from water'
_exptl_crystal_size_max            0.15
_exptl_crystal_size_mid            0.1
_exptl_crystal_size_min            0.05
_exptl_transmission_factor_max     ?
_exptl_transmission_factor_min     ?
_diffrn_reflns_av_R_equivalents    0.0144
_diffrn_reflns_av_unetI/netI       0.0174
_diffrn_reflns_Laue_measured_fraction_full  0.987
_diffrn_reflns_Laue_measured_fraction_max  0.987
_diffrn_reflns_limit_h_max         10
_diffrn_reflns_limit_h_min         -10
_diffrn_reflns_limit_k_max         11
_diffrn_reflns_limit_k_min         -11
_diffrn_reflns_limit_l_max         13
_diffrn_reflns_limit_l_min         -11
_diffrn_reflns_number              5980
_diffrn_reflns_point_group_measured_fraction_full  0.987
_diffrn_reflns_point_group_measured_fraction_max  0.987
_diffrn_reflns_theta_full          25.242
_diffrn_reflns_theta_max           27.480
_diffrn_reflns_theta_min           2.493
_diffrn_ambient_temperature        100(2)
_diffrn_detector                   'CCD area detector'
_diffrn_detector_area_resol_mean   28.5714
_diffrn_detector_type              'Rigaku HG Saturn724+ (2x2 bin mode)'
_diffrn_measured_fraction_theta_full  0.987
_diffrn_measured_fraction_theta_max  0.987
_diffrn_measurement_details
;
List of Runs (angles in degrees, time in seconds):

  # Type    Start    End  Width  t~exp~   \w     \q     \k     \f   Frames
--------------------------------------------------------------------------
  1  \w   -110.00  18.00   1.00   10.00    --  -20.00 -70.00  90.00  128
  2  \w   -110.00  10.00   1.00   10.00    --  -20.00 -70.00 225.00  120
  3  \w   -110.00  -9.00   1.00   10.00    --  -20.00 -70.00   0.00  101
  4  \w    -40.00 -10.00   1.00   10.00    --  -20.00   0.00 225.00   30
  5  \w   -110.00 -80.00   1.00   10.00    --  -20.00   0.00 135.00   30
;
_diffrn_measurement_device         'four-circle \k goniometer'
_diffrn_measurement_device_type   
 'Rigaku FRE+ equipped with HF Varimax confocal mirrors and an AFC12 goniometer and HG Saturn 724+ detector'
_diffrn_measurement_method         'profile data from \w-scans'
_diffrn_measurement_specimen_support  'MiTeGen MicroLoop'
_diffrn_orient_matrix_type        
 'CrysAlisPro convention (1999,Acta A55,543-557)'
_diffrn_orient_matrix_UB_11        0.0254889000
_diffrn_orient_matrix_UB_12        0.0540907000
_diffrn_orient_matrix_UB_13        0.0284007000
_diffrn_orient_matrix_UB_21        0.0477220000
_diffrn_orient_matrix_UB_22        -0.0666283000
_diffrn_orient_matrix_UB_23        0.0407075000
_diffrn_orient_matrix_UB_31        0.0756309000
_diffrn_orient_matrix_UB_32        -0.0132119000
_diffrn_orient_matrix_UB_33        -0.0530566000
_diffrn_radiation_collimation      0.2
_diffrn_radiation_monochromator    'Confocal mirrors, HF Varimax'
_diffrn_radiation_probe            x-ray
_diffrn_radiation_type             'Mo K\a'
_diffrn_radiation_wavelength       0.71075
_diffrn_radiation_xray_symbol      K-L~3~
_diffrn_source                     'Rotating Anode'
_diffrn_source_current             55.0
_diffrn_source_power               2.475
_diffrn_source_target              Mo
_diffrn_source_type                'Rigaku FRE+'
_diffrn_source_voltage             45.0
_reflns_Friedel_coverage           0.000
_reflns_Friedel_fraction_full      .
_reflns_Friedel_fraction_max       .
_reflns_number_gt                  2764
_reflns_number_total               3032
_reflns_odcompleteness_completeness  98.70
_reflns_odcompleteness_iscentric   1
_reflns_odcompleteness_theta       27.42
_reflns_special_details
;
 Reflections were merged by SHELXL according to the crystal
 class for the calculation of statistics and refinement.
 
 _reflns_Friedel_fraction is defined as the number of unique
 Friedel pairs measured divided by the number that would be
 possible theoretically, ignoring centric projections and
 systematic absences.
;
_reflns_threshold_expression       'I > 2\s(I)'
_computing_cell_refinement         'CrysAlisPro 1.171.40.53 (Rigaku OD, 2019)'
_computing_data_collection        
 'CrystalClear-SM Expert 2.0 r13 (Rigaku, 2011)'
_computing_data_reduction          'CrysAlisPro 1.171.40.53 (Rigaku OD, 2019)'
_computing_molecular_graphics      'Olex2 1.3 (Dolomanov et al., 2009)'
_computing_publication_material    'Olex2 1.3 (Dolomanov et al., 2009)'
_computing_structure_refinement    'ShelXL 2018/3 (Sheldrick, 2015)'
_computing_structure_solution      'SHELXT 2018/2 (Sheldrick, 2018)'
_refine_diff_density_max           0.629
_refine_diff_density_min           -0.235
_refine_diff_density_rms           0.053
_refine_ls_extinction_coef         .
_refine_ls_extinction_method       none
_refine_ls_goodness_of_fit_ref     1.037
_refine_ls_hydrogen_treatment      mixed
_refine_ls_matrix_type             full
_refine_ls_number_parameters       207
_refine_ls_number_reflns           3032
_refine_ls_number_restraints       0
_refine_ls_R_factor_all            0.0396
_refine_ls_R_factor_gt             0.0363
_refine_ls_restrained_S_all        1.037
_refine_ls_shift/su_max            0.000
_refine_ls_shift/su_mean           0.000
_refine_ls_structure_factor_coef   Fsqd
_refine_ls_weighting_details      
 'w=1/[\s^2^(Fo^2^)+(0.0612P)^2^+0.1933P] where P=(Fo^2^+2Fc^2^)/3'
_refine_ls_weighting_scheme        calc
_refine_ls_wR_factor_gt            0.0994
_refine_ls_wR_factor_ref           0.1024
_refine_special_details            ?
_olex2_refinement_description
;
1. Fixed Uiso
 At 1.2 times of:
  All C(H,H) groups
 At 1.5 times of:
  All C(H,H,H) groups
2.a Secondary CH2 refined with riding coordinates:
 C1(H1A,H1B), C3(H3A,H3B)
2.b Idealised Me refined as rotating group:
 C2(H2A,H2B,H2C), C4(H4A,H4B,H4C)
;
_atom_sites_solution_hydrogens     mixed
_atom_sites_solution_primary       dual
_atom_sites_solution_secondary     ?
loop_
  _atom_site_label
  _atom_site_type_symbol
  _atom_site_fract_x
  _atom_site_fract_y
  _atom_site_fract_z
  _atom_site_U_iso_or_equiv
  _atom_site_adp_type
  _atom_site_occupancy
  _atom_site_site_symmetry_order
  _atom_site_calc_flag
  _atom_site_refinement_flags_posn
  _atom_site_refinement_flags_adp
  _atom_site_refinement_flags_occupancy
  _atom_site_disorder_assembly
  _atom_site_disorder_group
 B1 B 0.27174(16) 0.60202(14) 0.78501(12) 0.0138(2) Uani 1 1 d . . . . .
 B2 B 0.37665(17) 0.37039(15) 0.63736(13) 0.0166(2) Uani 1 1 d . . . . .
 B3 B 0.16139(16) 0.37136(15) 0.84353(13) 0.0158(2) Uani 1 1 d . . . . .
 B4 B 0.46775(16) 0.69761(15) 0.86830(13) 0.0162(2) Uani 1 1 d . . . . .
 B5 B 0.25989(16) 0.88691(15) 0.74232(13) 0.0154(2) Uani 1 1 d . . . . .
 O1 O 0.36946(10) 0.52064(9) 0.65885(8) 0.01555(18) Uani 1 1 d . . . . .
 O2 O 0.27959(11) 0.29042(9) 0.73387(8) 0.01872(19) Uani 1 1 d . . . . .
 O3 O 0.14376(10) 0.52727(9) 0.86060(8) 0.01447(18) Uani 1 1 d . . . . .
 O4 O 0.39454(10) 0.58284(9) 0.87462(8) 0.01596(18) Uani 1 1 d . . . . .
 O5 O 0.40826(11) 0.84738(9) 0.79719(8) 0.01760(19) Uani 1 1 d . . . . .
 O6 O 0.18155(10) 0.77428(9) 0.74951(8) 0.01488(18) Uani 1 1 d . . . . .
 O7 O 0.47254(12) 0.29156(10) 0.52502(9) 0.0235(2) Uani 1 1 d . . . . .
 O8 O 0.06565(12) 0.28978(10) 0.93035(9) 0.0216(2) Uani 1 1 d . . . . .
 O9 O 0.60270(11) 0.67235(10) 0.93176(9) 0.0204(2) Uani 1 1 d . . . . .
 O10 O 0.18871(11) 1.03732(10) 0.68362(9) 0.01909(19) Uani 1 1 d . . . . .
 C1 C 0.69324(16) 1.02868(15) 0.84117(14) 0.0242(3) Uani 1 1 d . . . . .
 H1A H 0.694459 1.016031 0.940228 0.029 Uiso 1 1 calc R U . . .
 H1B H 0.571127 1.053402 0.831517 0.029 Uiso 1 1 calc R U . . .
 C2 C 0.75141(18) 1.17015(16) 0.77573(17) 0.0329(3) Uani 1 1 d . . . . .
 H2A H 0.871487 1.147379 0.786441 0.049 Uiso 1 1 calc R U . . .
 H2B H 0.673044 1.269972 0.820082 0.049 Uiso 1 1 calc R U . . .
 H2C H 0.747552 1.185193 0.678064 0.049 Uiso 1 1 calc R U . . .
 C3 C 0.80398(16) 0.86470(15) 0.63253(12) 0.0223(3) Uani 1 1 d . . . . .
 H3A H 0.858176 0.941144 0.574223 0.027 Uiso 1 1 calc R U . . .
 H3B H 0.681035 0.899668 0.621160 0.027 Uiso 1 1 calc R U . . .
 C4 C 0.90248(18) 0.69358(16) 0.58805(14) 0.0280(3) Uani 1 1 d . . . . .
 H4A H 1.024123 0.659180 0.599409 0.042 Uiso 1 1 calc R U . . .
 H4B H 0.900639 0.691722 0.491562 0.042 Uiso 1 1 calc R U . . .
 H4C H 0.846742 0.618587 0.644264 0.042 Uiso 1 1 calc R U . . .
 N1 N 0.80736(13) 0.87059(12) 0.77911(10) 0.0187(2) Uani 1 1 d . . . . .
 H1C H 0.919(2) 0.8453(18) 0.7871(15) 0.021(4) Uiso 1 1 d . . . . .
 H8 H -0.010(3) 0.354(2) 0.997(2) 0.045(5) Uiso 1 1 d . . . . .
 H1D H 0.769(2) 0.786(2) 0.8277(18) 0.032(4) Uiso 1 1 d . . . . .
 H10 H 0.236(3) 1.107(2) 0.6931(19) 0.045(5) Uiso 1 1 d . . . . .
 H7 H 0.529(3) 0.352(3) 0.471(2) 0.052(6) Uiso 1 1 d . . . . .
 H9 H 0.623(2) 0.580(2) 0.981(2) 0.041(5) Uiso 1 1 d . . . . .

loop_
  _atom_site_aniso_label
  _atom_site_aniso_U_11
  _atom_site_aniso_U_22
  _atom_site_aniso_U_33
  _atom_site_aniso_U_23
  _atom_site_aniso_U_13
  _atom_site_aniso_U_12
 B1 0.0148(5) 0.0128(5) 0.0143(6) -0.0011(4) -0.0009(4) -0.0067(4)
 B2 0.0180(6) 0.0158(6) 0.0164(6) -0.0012(4) -0.0010(5) -0.0079(5)
 B3 0.0167(6) 0.0151(5) 0.0162(6) -0.0012(4) -0.0014(4) -0.0075(5)
 B4 0.0167(6) 0.0163(6) 0.0161(6) -0.0009(4) -0.0014(4) -0.0077(5)
 B5 0.0166(6) 0.0146(5) 0.0148(6) -0.0024(4) -0.0002(4) -0.0063(5)
 O1 0.0173(4) 0.0146(4) 0.0149(4) -0.0021(3) 0.0015(3) -0.0083(3)
 O2 0.0230(4) 0.0149(4) 0.0182(4) -0.0039(3) 0.0042(3) -0.0106(3)
 O3 0.0152(4) 0.0136(4) 0.0148(4) -0.0024(3) 0.0010(3) -0.0072(3)
 O4 0.0176(4) 0.0142(4) 0.0180(4) 0.0015(3) -0.0052(3) -0.0077(3)
 O5 0.0196(4) 0.0155(4) 0.0208(4) 0.0016(3) -0.0061(3) -0.0095(3)
 O6 0.0148(4) 0.0126(4) 0.0179(4) -0.0007(3) -0.0032(3) -0.0059(3)
 O7 0.0301(5) 0.0191(4) 0.0211(4) -0.0068(3) 0.0085(4) -0.0145(4)
 O8 0.0259(5) 0.0179(4) 0.0210(4) -0.0054(3) 0.0065(3) -0.0132(4)
 O9 0.0227(4) 0.0198(4) 0.0234(4) 0.0052(3) -0.0098(3) -0.0121(3)
 O10 0.0215(4) 0.0137(4) 0.0241(4) 0.0004(3) -0.0070(3) -0.0076(3)
 C1 0.0186(6) 0.0231(6) 0.0288(7) -0.0064(5) 0.0005(5) -0.0064(5)
 C2 0.0239(6) 0.0214(6) 0.0506(9) -0.0069(6) 0.0003(6) -0.0078(5)
 C3 0.0212(6) 0.0253(6) 0.0196(6) 0.0001(5) -0.0051(4) -0.0072(5)
 C4 0.0318(7) 0.0269(6) 0.0266(7) -0.0041(5) -0.0106(5) -0.0080(5)
 N1 0.0171(5) 0.0188(5) 0.0206(5) -0.0002(4) -0.0034(4) -0.0075(4)

_geom_special_details
;
 All esds (except the esd in the dihedral angle between two l.s. planes)
 are estimated using the full covariance matrix.  The cell esds are taken
 into account individually in the estimation of esds in distances, angles
 and torsion angles; correlations between esds in cell parameters are only
 used when they are defined by crystal symmetry.  An approximate (isotropic)
 treatment of cell esds is used for estimating esds involving l.s. planes.
;
loop_
  _geom_bond_atom_site_label_1
  _geom_bond_atom_site_label_2
  _geom_bond_distance
  _geom_bond_site_symmetry_2
  _geom_bond_publ_flag
 B1 O1 1.4679(14) . ?
 B1 O3 1.4620(14) . ?
 B1 O4 1.4751(14) . ?
 B1 O6 1.4548(14) . ?
 B2 O1 1.3533(14) . ?
 B2 O2 1.3907(15) . ?
 B2 O7 1.3447(15) . ?
 B3 O2 1.3823(15) . ?
 B3 O3 1.3614(14) . ?
 B3 O8 1.3487(15) . ?
 B4 O4 1.3511(14) . ?
 B4 O5 1.3765(15) . ?
 B4 O9 1.3622(15) . ?
 B5 O5 1.3869(15) . ?
 B5 O6 1.3638(14) . ?
 B5 O10 1.3429(15) . ?
 O7 H7 0.88(2) . ?
 O8 H8 0.90(2) . ?
 O9 H9 0.87(2) . ?
 O10 H10 0.87(2) . ?
 C1 H1A 0.9900 . ?
 C1 H1B 0.9900 . ?
 C1 C2 1.5054(19) . ?
 C1 N1 1.4995(15) . ?
 C2 H2A 0.9800 . ?
 C2 H2B 0.9800 . ?
 C2 H2C 0.9800 . ?
 C3 H3A 0.9900 . ?
 C3 H3B 0.9900 . ?
 C3 C4 1.5072(18) . ?
 C3 N1 1.4951(15) . ?
 C4 H4A 0.9800 . ?
 C4 H4B 0.9800 . ?
 C4 H4C 0.9800 . ?
 N1 H1C 0.895(16) . ?
 N1 H1D 0.944(18) . ?

loop_
  _geom_angle_atom_site_label_1
  _geom_angle_atom_site_label_2
  _geom_angle_atom_site_label_3
  _geom_angle
  _geom_angle_site_symmetry_1
  _geom_angle_site_symmetry_3
  _geom_angle_publ_flag
 O1 B1 O4 109.32(9) . . ?
 O3 B1 O1 110.89(9) . . ?
 O3 B1 O4 107.40(9) . . ?
 O6 B1 O1 108.97(9) . . ?
 O6 B1 O3 109.50(9) . . ?
 O6 B1 O4 110.75(9) . . ?
 O1 B2 O2 119.81(10) . . ?
 O7 B2 O1 123.59(10) . . ?
 O7 B2 O2 116.60(10) . . ?
 O3 B3 O2 120.42(10) . . ?
 O8 B3 O2 117.19(10) . . ?
 O8 B3 O3 122.39(11) . . ?
 O4 B4 O5 121.23(10) . . ?
 O4 B4 O9 122.24(10) . . ?
 O9 B4 O5 116.53(10) . . ?
 O6 B5 O5 120.44(10) . . ?
 O10 B5 O5 120.79(10) . . ?
 O10 B5 O6 118.76(10) . . ?
 B2 O1 B1 123.16(9) . . ?
 B3 O2 B2 119.97(9) . . ?
 B3 O3 B1 121.88(9) . . ?
 B4 O4 B1 120.55(9) . . ?
 B4 O5 B5 119.23(9) . . ?
 B5 O6 B1 120.72(9) . . ?
 B2 O7 H7 109.3(13) . . ?
 B3 O8 H8 110.6(12) . . ?
 B4 O9 H9 109.7(12) . . ?
 B5 O10 H10 113.9(13) . . ?
 H1A C1 H1B 107.8 . . ?
 C2 C1 H1A 109.0 . . ?
 C2 C1 H1B 109.0 . . ?
 N1 C1 H1A 109.0 . . ?
 N1 C1 H1B 109.0 . . ?
 N1 C1 C2 112.77(11) . . ?
 C1 C2 H2A 109.5 . . ?
 C1 C2 H2B 109.5 . . ?
 C1 C2 H2C 109.5 . . ?
 H2A C2 H2B 109.5 . . ?
 H2A C2 H2C 109.5 . . ?
 H2B C2 H2C 109.5 . . ?
 H3A C3 H3B 108.1 . . ?
 C4 C3 H3A 109.6 . . ?
 C4 C3 H3B 109.6 . . ?
 N1 C3 H3A 109.6 . . ?
 N1 C3 H3B 109.6 . . ?
 N1 C3 C4 110.30(10) . . ?
 C3 C4 H4A 109.5 . . ?
 C3 C4 H4B 109.5 . . ?
 C3 C4 H4C 109.5 . . ?
 H4A C4 H4B 109.5 . . ?
 H4A C4 H4C 109.5 . . ?
 H4B C4 H4C 109.5 . . ?
 C1 N1 H1C 110.7(10) . . ?
 C1 N1 H1D 108.8(11) . . ?
 C3 N1 C1 115.35(10) . . ?
 C3 N1 H1C 108.8(10) . . ?
 C3 N1 H1D 105.7(10) . . ?
 H1C N1 H1D 107.1(14) . . ?

loop_
  _geom_hbond_atom_site_label_D
  _geom_hbond_atom_site_label_H
  _geom_hbond_atom_site_label_A
  _geom_hbond_distance_DH
  _geom_hbond_distance_HA
  _geom_hbond_distance_DA
  _geom_hbond_angle_DHA
  _geom_hbond_site_symmetry_A
  _geom_hbond_publ_flag
 N1 H1C O6 0.895(16) 2.010(16) 2.8807(13) 163.7(14) 1_655 yes
 O8 H8 O3 0.90(2) 1.80(2) 2.7053(12) 174.2(18) 2_567 yes
 N1 H1D O9 0.944(18) 2.009(18) 2.9103(13) 159.0(15) . yes
 O10 H10 O2 0.87(2) 1.91(2) 2.7602(11) 165.4(19) 1_565 yes
 O7 H7 O1 0.88(2) 1.85(2) 2.7223(12) 172.1(19) 2_666 yes
 O9 H9 O4 0.87(2) 1.90(2) 2.7353(12) 162.1(18) 2_667 yes

loop_
  _geom_torsion_atom_site_label_1
  _geom_torsion_atom_site_label_2
  _geom_torsion_atom_site_label_3
  _geom_torsion_atom_site_label_4
  _geom_torsion
  _geom_torsion_site_symmetry_1
  _geom_torsion_site_symmetry_2
  _geom_torsion_site_symmetry_3
  _geom_torsion_site_symmetry_4
  _geom_torsion_publ_flag
 O1 B1 O3 B3 22.75(14) . . . . ?
 O1 B1 O4 B4 92.18(11) . . . . ?
 O1 B1 O6 B5 -91.05(11) . . . . ?
 O1 B2 O2 B3 7.24(17) . . . . ?
 O2 B2 O1 B1 4.10(17) . . . . ?
 O2 B3 O3 B1 -13.85(16) . . . . ?
 O3 B1 O1 B2 -17.99(14) . . . . ?
 O3 B1 O4 B4 -147.42(10) . . . . ?
 O3 B1 O6 B5 147.50(9) . . . . ?
 O3 B3 O2 B2 -2.40(16) . . . . ?
 O4 B1 O1 B2 100.24(11) . . . . ?
 O4 B1 O3 B3 -96.64(11) . . . . ?
 O4 B1 O6 B5 29.24(13) . . . . ?
 O4 B4 O5 B5 6.30(16) . . . . ?
 O5 B4 O4 B1 11.50(16) . . . . ?
 O5 B5 O6 B1 -14.33(15) . . . . ?
 O6 B1 O1 B2 -138.60(10) . . . . ?
 O6 B1 O3 B3 143.04(10) . . . . ?
 O6 B1 O4 B4 -27.89(14) . . . . ?
 O6 B5 O5 B4 -4.99(16) . . . . ?
 O7 B2 O1 B1 -176.70(10) . . . . ?
 O7 B2 O2 B3 -172.02(10) . . . . ?
 O8 B3 O2 B2 177.17(10) . . . . ?
 O8 B3 O3 B1 166.60(10) . . . . ?
 O9 B4 O4 B1 -168.80(10) . . . . ?
 O9 B4 O5 B5 -173.42(10) . . . . ?
 O10 B5 O5 B4 173.70(10) . . . . ?
 O10 B5 O6 B1 166.96(10) . . . . ?
 C2 C1 N1 C3 -64.94(14) . . . . ?
 C4 C3 N1 C1 -171.96(10) . . . . ?

_shelx_res_file
;
TITL kat1c_a.res in P-1
    kat1c.res
    created by SHELXL-2018/3 at 13:52:55 on 25-Nov-2019
REM Old TITL Kat1c in P-1
REM SHELXT solution in P-1: R1 0.142, Rweak 0.008, Alpha 0.030
REM <I/s> 0.000 for 0 systematic absences, Orientation as input
REM Formula found by SHELXT: C8 B N O10
CELL 0.71075 8.3793 8.8187 10.0877 80.961 76.057 68.269
ZERR 2 0.0003 0.0004 0.0004 0.003 0.003 0.004
LATT 1
SFAC C H B N O
UNIT 8 32 10 2 20
EQIV $1 1-X,1-Y,1-Z
EQIV $2 -X,1-Y,2-Z
EQIV $3 1-X,1-Y,2-Z
EQIV $4 +X,1+Y,+Z
EQIV $5 1+X,+Y,+Z

L.S. 10
PLAN  5
SIZE 0.05 0.1 0.15
TEMP -173(2)
CONF
HTAB O7 O1_$1
HTAB O8 O3_$2
HTAB O9 O4_$3
HTAB O10 O2_$4
HTAB N1 O6_$5
HTAB N1 O9
MORE -1
BOND $H
fmap 2 53
acta
REM <olex2.extras>
REM <HklSrc "%.\\Kat1c.hkl">
REM </olex2.extras>

WGHT    0.061200    0.193300
FVAR       1.33619
B1    3    0.271737    0.602017    0.785007    11.00000    0.01477    0.01282 =
         0.01431   -0.00111   -0.00089   -0.00665
B2    3    0.376650    0.370385    0.637355    11.00000    0.01803    0.01580 =
         0.01640   -0.00121   -0.00103   -0.00787
B3    3    0.161387    0.371363    0.843534    11.00000    0.01673    0.01514 =
         0.01625   -0.00116   -0.00139   -0.00748
B4    3    0.467749    0.697608    0.868304    11.00000    0.01671    0.01630 =
         0.01614   -0.00090   -0.00136   -0.00770
B5    3    0.259893    0.886909    0.742317    11.00000    0.01659    0.01456 =
         0.01479   -0.00242   -0.00018   -0.00635
O1    5    0.369461    0.520645    0.658848    11.00000    0.01727    0.01461 =
         0.01491   -0.00208    0.00153   -0.00826
O2    5    0.279587    0.290416    0.733872    11.00000    0.02303    0.01489 =
         0.01818   -0.00392    0.00416   -0.01058
O3    5    0.143761    0.527266    0.860603    11.00000    0.01519    0.01360 =
         0.01480   -0.00238    0.00101   -0.00716
O4    5    0.394537    0.582837    0.874618    11.00000    0.01760    0.01419 =
         0.01799    0.00146   -0.00519   -0.00772
O5    5    0.408260    0.847376    0.797189    11.00000    0.01960    0.01552 =
         0.02076    0.00158   -0.00615   -0.00946
O6    5    0.181554    0.774281    0.749513    11.00000    0.01484    0.01263 =
         0.01795   -0.00071   -0.00321   -0.00586
O7    5    0.472536    0.291556    0.525019    11.00000    0.03008    0.01909 =
         0.02105   -0.00676    0.00850   -0.01448
O8    5    0.065653    0.289776    0.930350    11.00000    0.02590    0.01793 =
         0.02101   -0.00537    0.00655   -0.01322
O9    5    0.602701    0.672352    0.931763    11.00000    0.02269    0.01978 =
         0.02344    0.00524   -0.00978   -0.01210
O10   5    0.188713    1.037321    0.683620    11.00000    0.02152    0.01373 =
         0.02407    0.00035   -0.00703   -0.00760
C1    1    0.693235    1.028682    0.841173    11.00000    0.01865    0.02306 =
         0.02884   -0.00638    0.00054   -0.00645
AFIX  23
H1A   2    0.694459    1.016031    0.940228    11.00000   -1.20000
H1B   2    0.571127    1.053402    0.831517    11.00000   -1.20000
AFIX   0
C2    1    0.751405    1.170150    0.775730    11.00000    0.02391    0.02137 =
         0.05065   -0.00689    0.00029   -0.00776
AFIX 137
H2A   2    0.871487    1.147379    0.786441    11.00000   -1.50000
H2B   2    0.673044    1.269972    0.820082    11.00000   -1.50000
H2C   2    0.747552    1.185193    0.678064    11.00000   -1.50000
AFIX   0
C3    1    0.803979    0.864695    0.632529    11.00000    0.02120    0.02531 =
         0.01957    0.00014   -0.00505   -0.00721
AFIX  23
H3A   2    0.858176    0.941144    0.574223    11.00000   -1.20000
H3B   2    0.681035    0.899668    0.621160    11.00000   -1.20000
AFIX   0
C4    1    0.902484    0.693583    0.588051    11.00000    0.03181    0.02692 =
         0.02663   -0.00412   -0.01056   -0.00799
AFIX 137
H4A   2    1.024123    0.659180    0.599409    11.00000   -1.50000
H4B   2    0.900639    0.691722    0.491562    11.00000   -1.50000
H4C   2    0.846742    0.618587    0.644264    11.00000   -1.50000
AFIX   0
N1    4    0.807355    0.870588    0.779112    11.00000    0.01712    0.01883 =
         0.02060   -0.00016   -0.00344   -0.00755
H1C   2    0.918592    0.845263    0.787122    11.00000    0.02137

H8    2   -0.010037    0.353772    0.996797    11.00000    0.04522
H1D   2    0.768807    0.785844    0.827723    11.00000    0.03229
H10   2    0.236083    1.107201    0.693082    11.00000    0.04488
H7    2    0.529330    0.352122    0.471158    11.00000    0.05153
H9    2    0.623114    0.579599    0.980991    11.00000    0.04120
HKLF 4


REM  kat1c_a.res in P-1
REM wR2 = 0.1024, GooF = S = 1.037, Restrained GooF = 1.037 for all data
REM R1 = 0.0363 for 2764 Fo > 4sig(Fo) and 0.0396 for all 3032 data
REM 207 parameters refined using 0 restraints

END

WGHT      0.0614      0.1931

REM Highest difference peak  0.629,  deepest hole -0.235,  1-sigma level  0.053
Q1    1   0.9435  1.0192  0.9920  11.00000  0.05    0.63
Q2    1   0.2219  0.6905  0.7681  11.00000  0.05    0.29
Q3    1   0.3362  0.5869  0.8326  11.00000  0.05    0.27
Q4    1   0.3934  0.4335  0.6605  11.00000  0.05    0.27
Q5    1   0.8466  0.7767  0.6210  11.00000  0.05    0.26
;
_shelx_res_checksum                23698
_shelx_hkl_file
;
   0   0   2 8405.45   18.91
   0   0  -2 8372.17   20.23
   0   0  -3 1037.66    8.94
   0   0   3 1085.14    7.41
   0   0   4  114.13    3.18
   0   0   4  110.27    2.80
   0   0  -4  114.48    3.52
   0   0   5   74.14    2.85
   0   0   6   11.44    1.35
   0   0   7  261.06    6.26
   0   0   8  161.14    5.17
   0   0   9    4.90    1.24
   0   0  11   72.79    4.19
   0   0  12    0.21    1.04
   0  -1  12    3.49    1.42
   0  -1  11   33.08    2.94
   0  -1  10  617.64   11.68
   0  -1   9    8.18    1.80
   0  -1   8  189.11    5.94
   0  -1   5  342.71    6.34
   0   1  -4  518.28    7.93
   0  -1   4  503.26    7.06
   0   1  -4  510.50    5.93
   0  -1   4  517.67    5.97
   0  -1   3  116.65    2.47
   0   1  -3  117.17    2.43
   0   1  -3  114.02    3.24
   0   1  -2  871.55    3.61
   0  -1   2  873.35    5.57
   0  -1   2  858.85    3.24
   0  -1   2  852.65    6.94
   0   1  -2  851.42    5.50
   0  -1   1  456.68    3.28
   0   1  -1  450.21    2.68
   0  -1   1  448.31    3.37
   0   1  -1  462.21    3.50
   0   1  -1  441.50    3.16
   0  -1   1  451.48    2.60
   0   1   0  605.72    4.01
   0   1   0  614.49    3.27
   0  -1   0  626.69    4.11
   0   1   0  598.00    3.79
   0  -1   0  616.85    3.28
   0  -1  -1 3897.31    8.85
   0   1   1 3927.39    8.94
   0   1   2 4070.90    9.73
   0   1   2 4106.08   11.92
   0   1   3  102.11    1.65
   0   1   3  101.25    2.44
   0  -1  -4 4295.85   20.29
   0   1   4 4342.52   18.36
   0   1   5  882.90    5.49
   0   1   6  656.13    4.91
   0   1   6  618.76    8.54
   0   1   7  188.29    2.69
   0   1   7  173.14    4.95
   0   1   8  108.71    1.94
   0   1   9    0.34    1.01
   0   1  10   42.96    2.97
   0   1  11    3.20    1.17
   0   1  12    3.49    1.30
   0  -2  12   32.73    3.33
   0  -2  11   74.31    4.46
   0  -2  10  296.39    8.16
   0  -2   9  451.24    9.92
   0  -2   8   56.53    3.38
   0  -2   7  154.38    5.33
   0   2  -6 4032.19   20.25
   0  -2   6 3862.94   23.98
   0   2  -5  158.80    3.75
   0   2  -5  151.01    1.89
   0  -2   5  155.80    4.54
   0   2  -4 4873.33   19.13
   0  -2   4 4907.03   19.49
   0  -2   4 4807.92   23.40
   0  -2   4 4700.90   10.17
   0   2  -4 4785.96   12.20
   0   2  -4 4934.85   18.63
   0  -2   3  441.82    5.10
   0   2  -3  433.86    3.81
   0   2  -3  446.45    5.38
   0  -2   3  448.28    6.37
   0  -2   3  431.50    3.39
   0  -2   2 1316.57    9.53
   0  -2   2 1320.59    6.22
   0   2  -2 1276.93    7.64
   0   2  -2 1309.58    6.78
   0  -2   2 1310.51    8.10
   0  -2   2 1334.45    8.22
   0   2  -2 1363.88    8.65
   0   2  -1  420.14    3.82
   0   2  -1  400.17    4.01
   0  -2   1  405.43    4.19
   0   2  -1  421.86    4.79
   0  -2   1  405.25    3.60
   0  -2   1  414.84    4.46
   0  -2   1  425.38    5.04
   0  -2   0 1095.96    7.64
   0   2   0 1108.63    6.40
   0   2   0 1082.02    7.61
   0  -2   0 1109.54    6.22
   0   2   0 1098.72    7.21
   0   2   1   68.49    1.22
   0   2   1   70.57    2.20
   0   2   1   69.02    1.63
   0  -2  -1   70.46    1.27
   0  -2  -1   75.19    1.75
   0   2   1   67.43    2.00
   0   2   2   84.61    1.88
   0  -2  -2   87.47    1.85
   0   2   2   86.23    1.68
   0   2   3 2675.65   11.82
   0   2   3 2691.19   10.93
   0  -2  -3 2658.85   12.26
   0   2   4 1641.42    8.91
   0  -2  -4 1619.18   12.35
   0   2   4 1630.84   11.04
   0   2   5  478.00    5.04
   0   2   6  692.64    6.44
   0   2   6  687.16    8.75
   0   2   7  335.86    6.71
   0   2   7  326.68    4.60
   0   2   8    3.40    1.01
   0   2   8    2.58    0.60
   0   2   9   12.86    1.73
   0   2  10  288.15    7.70
   0   2  11   31.61    2.85
   0   2  12   78.09    4.53
   0  -3  11   47.41    3.66
   0  -3  10   -0.29    0.96
   0  -3   9  120.32    5.24
   0  -3   8  517.91   10.51
   0  -3   7   25.77    2.28
   0   3  -7   24.06    1.79
   0   3  -6   30.04    1.16
   0  -3   6   28.56    2.23
   0   3  -6   28.69    1.83
   0   3  -5  268.99    5.00
   0  -3   5  278.00    6.37
   0   3  -5  282.32    3.83
   0  -3   4  101.89    3.58
   0  -3   4  100.75    2.04
   0   3  -4  103.54    2.87
   0   3  -4  100.80    2.33
   0  -3   4  107.71    3.08
   0  -3   3  270.76    4.58
   0  -3   3  256.33    3.38
   0   3  -3  265.57    3.87
   0   3  -3  253.47    4.10
   0  -3   3  271.13    5.39
   0  -3   2 5558.54   16.16
   0  -3   2 5567.74   19.89
   0   3  -2 5608.30   17.59
   0  -3   2 5586.30   23.70
   0  -3   2 5616.67   19.81
   0  -3   1 1077.52    8.68
   0  -3   1 1059.80    9.59
   0   3  -1 1052.93    7.95
   0   3  -1 1081.43    7.82
   0  -3   1 1084.58    7.40
   0  -3   1 1085.07    8.71
   0   3   0  356.72    4.49
   0   3   0  346.53    5.39
   0   3   0  350.10    4.87
   0  -3   0  358.62    3.35
   0  -3   0  359.55    5.49
   0  -3   0  369.82    5.91
   0  -3   0  360.51    4.46
   0   3   1  604.53    7.05
   0  -3  -1  603.43    7.55
   0  -3  -1  635.72    4.41
   0   3   1  613.91    7.41
   0   3   1  636.08    6.12
   0   3   1  605.28    4.20
   0  -3  -1  636.02    5.93
   0   3   2 1442.22   12.40
   0  -3  -2 1506.90    9.33
   0  -3  -2 1531.25    7.74
   0   3   2 1464.95   11.61
   0   3   2 1520.70    9.54
   0   3   2 1489.99    7.42
   0   3   3    6.30    0.61
   0  -3  -3    6.71    0.74
   0   3   3    6.50    0.75
   0  -3  -3    7.46    0.76
   0   3   4   13.59    1.03
   0   3   4   11.75    0.96
   0  -3  -4   13.64    1.02
   0  -3  -4   11.04    1.04
   0   3   5 1625.09   10.87
   0   3   6   39.41    2.08
   0   3   7  249.87    5.61
   0   3   8    1.48    0.74
   0   3   9  552.05    9.67
   0   3  10    1.62    0.90
   0   3  11   36.16    2.87
   0   3  12   27.01    2.77
   0  -4  11   20.89    2.56
   0  -4  10   29.78    2.95
   0  -4   9  161.53    6.35
   0   4  -8   10.61    1.40
   0  -4   8   12.69    1.98
   0   4  -7   83.97    3.41
   0  -4   7   74.57    3.90
   0   4  -6  269.21    4.49
   0   4  -6  285.23    5.78
   0  -4   6  273.37    7.09
   0   4  -5  408.25    5.70
   0  -4   5  419.63    8.26
   0   4  -5  401.29    6.41
   0   4  -4    9.36    0.96
   0  -4   4    9.15    1.29
   0   4  -4    7.14    0.79
   0  -4   4    7.68    0.72
   0  -4   3  584.35    7.58
   0   4  -3  579.34    6.92
   0   4  -3  586.47    6.85
   0  -4   3  586.51    6.07
   0  -4   3  588.59    8.57
   0   4  -2    0.67    0.38
   0  -4   2    0.94    0.40
   0   4  -2    0.11    0.40
   0  -4   2    0.30    0.42
   0  -4   1 3067.17   14.53
   0   4  -1 3038.23   15.81
   0   4  -1 3033.36   15.84
   0  -4   0    1.42    0.33
   0   4   0    2.08    0.55
   0  -4   0    1.92    0.71
   0  -4   0    2.79    0.72
   0  -4   0    2.74    0.57
   0   4   1 1953.28   14.50
   0   4   1 1985.65   14.83
   0  -4  -1 1961.61    8.95
   0   4   2  484.22    8.02
   0   4   2  473.09    4.51
   0   4   2  488.47    7.49
   0  -4  -2  472.38    4.66
   0   4   3    3.84    0.99
   0  -4  -3    3.12    0.59
   0   4   3    3.74    0.54
   0  -4  -3    3.54    0.58
   0   4   4    4.85    1.13
   0   4   4    5.74    0.71
   0  -4  -4    6.26    0.77
   0  -4  -4    6.00    0.83
   0   4   6   32.58    1.87
   0   4   7  651.96    8.94
   0   4   8   94.46    3.69
   0   4   9   25.24    2.17
   0   4  10  120.00    4.86
   0   4  11    7.63    1.59
   0   4  12   92.07    4.79
   0  -5  10   98.14    5.34
   0  -5   9  456.50   10.91
   0  -5   8   43.50    3.43
   0   5  -8   35.39    2.49
   0  -5   7   22.36    2.42
   0   5  -7   17.30    1.67
   0  -5   6    0.93    0.90
   0   5  -6    2.69    0.78
   0   5  -5    1.52    0.56
   0  -5   5    0.99    0.86
   0   5  -4   22.26    1.56
   0  -5   4   19.74    1.84
   0  -5   3   19.10    1.77
   0   5  -3   19.71    1.44
   0  -5   3   16.55    1.50
   0  -5   3   16.74    1.24
   0   5  -2  236.73    4.87
   0  -5   2  229.97    4.47
   0  -5   1    1.63    0.53
   0   5  -1    0.96    0.49
   0   5   0  902.77   10.06
   0  -5   0  928.19    7.19
   0  -5   0  932.66   10.47
   0  -5   0  928.22    9.26
   0   5   0  928.80   11.42
   0  -5  -1  362.84    4.31
   0   5   1  369.70    7.23
   0  -5  -1  366.45    6.71
   0   5   1  350.41    6.80
   0  -5  -1  368.03    5.87
   0   5   2  369.29    7.26
   0  -5  -2  347.28    4.39
   0   5   2  357.56    7.37
   0  -5  -2  367.54    5.99
   0   5   3   76.49    3.65
   0   5   3   74.74    2.10
   0  -5  -3   77.19    2.85
   0  -5  -3   74.16    2.31
   0   5   3   78.45    3.51
   0   5   4    0.90    0.45
   0  -5  -4    0.12    0.45
   0   5   4    0.01    0.84
   0  -5  -4   -0.03    0.50
   0   5   4    0.98    0.77
   0   5   5  866.47   14.02
   0   5   5  832.28    8.36
   0   5   5  837.94   11.67
   0   5   6  456.50   10.99
   0   5   6  448.06    6.82
   0   5   7  170.03    4.61
   0   5   8   25.10    1.98
   0   5   9   44.18    2.75
   0   5  10    0.26    0.73
   0   5  11    8.73    1.54
   0  -6   9   25.31    2.81
   0   6  -9   28.67    2.48
   0   6  -8  141.63    5.03
   0  -6   8  138.63    6.09
   0  -6   7  182.03    6.51
   0   6  -7  181.49    5.34
   0  -6   6    6.90    1.27
   0   6  -6    9.47    1.37
   0   6  -5 1462.64   13.70
   0  -6   5 1511.07   17.06
   0   6  -4    6.98    1.02
   0  -6   4    5.71    1.25
   0  -6   3   24.57    1.66
   0  -6   3   25.16    2.02
   0   6  -3   25.05    1.76
   0  -6   3   22.43    2.01
   0  -6   2    1.99    0.62
   0   6  -2    1.76    0.68
   0  -6   1  590.49    9.04
   0   6  -1  597.30    8.56
   0  -6   1  595.45    8.07
   0  -6   0  476.52    5.73
   0  -6   0  460.80    7.99
   0  -6   0  471.11    7.31
   0   6   0  465.49    7.96
   0  -6  -1  694.54    9.97
   0   6   1  724.37   10.30
   0   6   1  754.38   11.50
   0  -6  -1  710.36    6.78
   0  -6  -1  733.27    9.09
   0   6   2    3.12    0.91
   0  -6  -2    2.21    0.89
   0   6   2    1.74    0.79
   0  -6  -2    1.27    0.52
   0   6   3   84.30    3.88
   0   6   3   93.30    4.27
   0  -6  -3   87.63    3.28
   0   6   4  187.63    6.44
   0   6   4  183.51    3.74
   0   6   4  174.99    5.67
   0   6   5  995.10   15.83
   0   6   5  998.11    9.30
   0   6   5 1020.22   14.14
   0   6   6  122.49    5.21
   0   6   6  131.85    6.08
   0   6   6  123.99    3.61
   0   6   7   23.14    2.46
   0   6   7   23.70    2.90
   0   6   7   17.56    1.58
   0   6   8   18.35    2.29
   0   6   8   12.81    2.48
   0   6   8   16.42    1.63
   0   6   9   13.54    2.73
   0   6   9   11.08    1.80
   0   6   9   11.94    1.48
   0   6  10  141.52    5.25
   0   6  10  150.68    8.40
   0   6  11   38.35    4.79
   0   6  11   22.50    2.36
   0   7  -8   28.01    2.40
   0  -7   8   21.48    2.67
   0  -7   7    1.34    1.22
   0   7  -7    0.04    0.78
   0  -7   6   48.85    3.51
   0   7  -6   47.31    2.78
   0   7  -5  110.00    4.05
   0  -7   5  110.54    4.82
   0   7  -4   68.66    3.15
   0  -7   4   72.37    3.70
   0  -7   3   76.58    3.62
   0   7  -3   73.27    3.15
   0  -7   3   73.88    3.62
   0  -7   2    8.27    1.29
   0   7  -2    8.62    1.17
   0   7  -1   22.75    1.85
   0  -7   1   26.54    2.22
   0  -7   1   22.68    1.76
   0  -7   0  571.64    8.69
   0   7   0  562.26    9.26
   0  -7   0  544.09    9.55
   0  -7  -1  203.13    5.29
   0  -7  -1  193.23    5.68
   0   7   1  210.93    6.06
   0   7   2    7.59    1.50
   0  -7  -2    6.17    1.19
   0   7   2    5.75    1.26
   0  -7  -3 1403.61   15.93
   0   7   3 1443.13   17.12
   0   7   3 1396.11   17.08
   0   7   4   43.35    3.30
   0   7   4   41.48    3.00
   0   7   5  154.31    5.86
   0   7   5  160.47    6.69
   0   7   5  148.16    3.62
   0   7   6   76.69    2.86
   0   7   6   80.32    4.99
   0   7   6   75.98    4.25
   0   7   7   53.25    2.66
   0   7   7   58.49    3.95
   0   7   7   57.19    4.52
   0   7   8   19.58    3.03
   0   7   8   17.77    1.64
   0   7   8   16.56    2.28
   0   7   9    1.77    2.12
   0   7   9   -0.81    1.31
   0   7  10   74.48    6.18
   0  -8   7   72.25    4.40
   0   8  -7   76.13    3.79
   0   8  -6  206.37    5.94
   0  -8   6  215.26    7.30
   0   8  -5    6.64    1.24
   0  -8   5    7.92    1.69
   0  -8   4  212.29    6.53
   0   8  -4  205.69    5.78
   0  -8   3   17.26    2.03
   0   8  -3   15.66    1.65
   0  -8   2  101.35    4.28
   0   8  -2  101.90    4.04
   0   8  -1  391.33    8.11
   0  -8   1  387.75    8.72
   0  -8   0    1.37    0.81
   0   8   0    1.25    0.84
   0   8   1  142.67    5.25
   0  -8  -1  135.09    5.12
   0  -8  -2  295.59    7.60
   0   8   2  285.34    7.71
   0   8   3    2.45    0.95
   0  -8  -3    4.54    1.19
   0   8   3    3.17    1.23
   0   8   4  207.92    7.38
   0   8   4  210.84    7.36
   0  -8  -4  211.77    6.81
   0   8   5  375.90   10.46
   0   8   5  399.16    9.99
   0   8   6    9.24    1.79
   0   8   6    8.20    1.89
   0   8   7   15.10    2.67
   0   8   7    7.67    1.78
   0   8   8   62.70    4.34
   0   8   8   64.01    5.25
   0   8   9  123.79    7.74
   0   9  -5   51.39    3.13
   0  -9   5   52.05    3.62
   0   9  -4    8.52    1.46
   0   9  -3   22.05    2.07
   0   9  -2    3.17    1.09
   0   9  -1   22.86    2.19
   0  -9   1   22.75    2.44
   0  -9   0  104.77    4.83
   0   9   0  112.35    4.77
   0   9   1    1.39    0.96
   0  -9  -1    0.48    0.87
   0   9   2   44.61    3.30
   0  -9  -2   45.38    3.30
   0  -9  -3  137.43    5.63
   0   9   3  158.45    6.31
   0   9   4    3.11    1.48
   0  -9  -4    0.54    1.02
   0   9   4    0.61    1.06
   0   9   5  136.16    6.45
   0   9   5  127.72    6.30
   0  -9  -6  224.46    7.68
   0   9   6  224.50    8.26
   0   9   6  225.71    8.76
   0   9   7   21.97    3.18
   0   9   7   19.77    2.77
   0  -9  -7   20.96    2.54
   0 -10   2   60.89    4.00
   0  10  -2   61.22    3.65
   0  10  -1  156.05    5.78
   0 -10   1  153.25    6.17
   0 -10   0   51.22    3.63
   0  10   0   54.10    3.59
   0  10   1  125.62    5.56
   0 -10  -1  124.27    5.66
   0  10   2   -0.31    1.06
   0 -10  -2   -0.06    1.09
   0 -10  -3    3.29    1.44
   0  10   3    2.67    1.45
   0  10   4   17.82    2.54
   0 -10  -4   22.38    2.68
   0  10   5  473.30   12.72
   0 -10  -5  434.98   10.83
  -1  10   3  216.34    8.14
   1 -10  -3  231.14    7.81
  -1  10   2    1.12    1.12
  -1  10   1   40.74    3.43
   1 -10  -1   39.28    3.32
  -1  10   0    2.63    1.31
   1 -10   0    3.78    1.42
  -1  10  -1   31.68    2.95
  -1   9   6   96.95    6.05
   1  -9  -6   82.48    4.61
   1  -9  -5   31.68    2.83
  -1   9   5   27.91    3.24
   1  -9  -4    3.62    1.40
  -1   9   4    3.68    1.45
  -1   9   3    3.25    1.55
   1  -9  -3    2.59    1.40
   1  -9  -2  326.54    8.61
  -1   9   2  325.85    9.20
  -1   9   1   47.63    3.52
   1  -9   0    9.93    1.77
  -1   9   0    8.28    1.65
   1  -9   1  102.58    4.90
  -1   9  -1  100.18    4.77
  -1   9  -2    8.73    1.55
  -1   9  -3    0.11    0.90
  -1   9  -4    2.61    1.10
  -1   9  -5   28.49    2.54
  -1   8   8  122.70    7.38
   1  -8  -7   11.31    1.88
  -1   8   7   13.64    2.65
  -1   8   7   11.13    2.06
  -1   8   6   15.14    2.20
   1  -8  -6   15.87    2.09
  -1   8   6   21.07    2.93
  -1   8   5  334.70    9.32
   1  -8  -5  334.32    8.35
  -1   8   5  340.67   10.22
  -1   8   4   56.68    4.03
   1  -8  -4   49.95    3.27
   1  -8  -3   12.19    1.84
  -1   8   3   12.14    1.94
   1  -8  -2   33.66    2.75
  -1   8   2   34.30    2.92
  -1   8   1    3.64    1.29
   1  -8  -1    4.85    1.22
  -1   8   0  172.23    5.95
   1  -8   0  168.01    5.84
   1  -8   1   21.74    2.24
  -1   8  -1   22.03    2.14
  -1   8  -2  237.27    6.76
  -1   8  -3   29.86    2.43
   1  -8   3   28.66    2.17
  -1   8  -4    7.90    1.38
   1  -8   4    7.74    1.39
  -1   8  -5   84.34    4.01
   1  -8   5   91.99    4.44
  -1   8  -6    2.80    1.03
   1  -8   6    3.93    1.41
   1  -8   7  115.87    5.26
  -1   8  -7  119.20    5.08
  -1   7   9   -1.31    1.98
  -1   7   8  412.09   10.00
  -1   7   8  492.58   14.33
  -1   7   7   49.15    4.46
  -1   7   7   36.55    3.04
  -1   7   6   20.00    2.29
  -1   7   6   23.09    2.97
   1  -7  -6   20.37    2.20
  -1   7   5  108.35    4.96
   1  -7  -5  110.06    4.60
  -1   7   5  107.66    5.58
   1  -7  -4  199.58    5.96
  -1   7   4  197.33    7.10
   1  -7  -3  587.01   10.02
  -1   7   3  573.72   11.64
  -1   7   2   48.80    3.25
   1  -7  -2   50.17    2.97
   1  -7  -1   46.03    2.84
  -1   7   1   45.13    3.00
   1  -7   0   54.96    3.11
  -1   7   0   59.28    3.32
   1  -7   1  224.07    4.93
  -1   7  -1  216.86    6.12
   1  -7   1  220.81    6.13
  -1   7  -2  262.92    6.65
   1  -7   2  279.51    5.82
   1  -7   3  732.97   10.10
  -1   7  -3  703.50   10.76
  -1   7  -4    0.56    0.67
   1  -7   4    1.06    1.03
  -1   7  -5    1.77    0.82
   1  -7   5    2.39    0.97
  -1   7  -6  846.42   12.17
   1  -7   6  852.04   13.36
  -1   7  -7  121.58    4.82
   1  -7   7  121.10    5.30
  -1   7  -8    0.06    0.85
   1  -7   8    0.35    1.26
  -1   6   9   68.96    5.66
  -1   6   8   26.90    1.94
  -1   6   8   25.80    2.43
  -1   6   7  128.19    6.72
  -1   6   7  114.44    3.63
  -1   6   7  117.52    4.88
  -1   6   6  118.36    4.83
  -1   6   6  118.15    3.35
  -1   6   6  127.66    6.28
  -1   6   5   35.11    1.66
  -1   6   5   31.37    3.02
  -1   6   5   34.27    2.62
   1  -6  -4 1210.58   13.64
  -1   6   4 1177.13   16.88
  -1   6   4 1101.05    7.76
  -1   6   4 1256.32   15.12
   1  -6  -4 1064.62    9.71
   1  -6  -3   42.80    2.66
  -1   6   3   45.28    3.17
  -1   6   3   46.47    2.96
   1  -6  -2   45.16    2.61
  -1   6   2   49.35    3.15
   1  -6  -2   44.34    1.51
   1  -6  -1   23.52    1.03
  -1   6   1   28.20    2.25
   1  -6  -1   26.51    2.03
   1  -6   0  120.75    4.23
  -1   6   0  128.96    4.56
   1  -6   0  122.58    2.50
   1  -6   1   84.15    2.24
   1  -6   1   93.11    2.98
   1  -6   1   83.12    3.60
  -1   6  -1   84.38    3.56
  -1   6  -2   15.63    1.59
   1  -6   2   16.47    1.43
   1  -6   2   12.64    1.51
   1  -6   3   23.44    1.86
  -1   6  -3   22.42    1.86
  -1   6  -4   86.57    3.61
   1  -6   4   82.42    3.55
  -1   6  -5  450.18    8.29
   1  -6   5  433.90    8.66
  -1   6  -6  532.74    9.22
   1  -6   6  548.89   10.48
   1  -6   7  520.13   10.76
  -1   6  -7  528.22    9.68
  -1   6  -8    1.24    0.90
   1  -6   8    0.35    1.08
   1  -6   9    1.71    1.38
  -1   6  -9    2.60    1.13
  -1   5  11   19.26    2.15
  -1   5  11   28.76    4.08
  -1   5  10   16.47    1.84
  -1   5  10   13.50    2.89
  -1   5   9   84.68    3.62
  -1   5   9  105.74    6.96
  -1   5   8   36.69    2.77
  -1   5   8   32.67    2.19
  -1   5   7    9.32    1.17
  -1   5   7    6.92    1.39
  -1   5   7   10.87    2.12
  -1   5   6   16.19    1.31
  -1   5   6   14.24    1.64
  -1   5   6   17.07    2.44
  -1   5   5  234.86    4.20
  -1   5   5  241.32    7.86
  -1   5   5  228.33    5.93
  -1   5   4 2479.96   18.77
  -1   5   4 2478.55   23.32
  -1   5   3   56.26    1.57
   1  -5  -3   55.40    1.90
  -1   5   3   61.47    3.47
   1  -5  -3   67.37    2.96
  -1   5   3   66.17    3.12
   1  -5  -2  386.61    4.05
  -1   5   2  392.17    8.12
   1  -5  -2  393.00    6.89
   1  -5  -1  521.91    4.20
  -1   5   1  503.25    8.83
   1  -5  -1  517.92    7.76
   1  -5   0  285.64    5.84
  -1   5   0  293.37    6.32
   1  -5   0  300.13    3.50
   1  -5   1  213.27    4.19
  -1   5  -1  212.96    5.27
   1  -5   1  200.52    5.00
  -1   5  -2  237.98    5.41
   1  -5   2  233.78    4.77
   1  -5   2  226.33    5.25
  -1   5  -3   68.42    2.91
   1  -5   3   64.78    2.76
   1  -5   4  101.47    3.72
  -1   5  -4   91.00    3.44
  -1   5  -5   10.25    1.28
   1  -5   5   10.94    1.48
   1  -5   6  163.69    5.58
  -1   5  -6  164.89    4.87
  -1   5  -7    0.01    0.68
   1  -5   7    1.01    0.89
   1  -5   8  133.60    5.42
  -1   5  -8  146.81    5.09
   1  -5   9    7.41    1.65
  -1   5  -9   11.63    1.65
   1  -5  10   69.54    4.31
  -1   5 -10   84.53    4.31
  -1   4  11  113.28    5.02
  -1   4  10   10.75    1.61
  -1   4   9    9.21    1.33
  -1   4   8   70.61    3.20
  -1   4   7   13.64    1.36
  -1   4   6  289.21    6.48
  -1   4   6  280.06    5.24
  -1   4   5  149.15    3.44
  -1   4   5  145.44    5.83
  -1   4   4   78.05    2.24
  -1   4   4   75.88    4.08
   1  -4  -4   68.76    2.55
  -1   4   3  172.16    5.46
   1  -4  -3  177.87    3.30
  -1   4   3  180.22    2.79
   1  -4  -2  114.18    2.09
  -1   4   2  117.53    4.29
   1  -4  -2  103.15    3.26
  -1   4   2  107.08    1.75
   1  -4  -1    8.15    0.48
  -1   4   1    7.93    1.12
   1  -4  -1    7.80    0.95
   1  -4   0 4818.29   21.32
  -1   4   0 4781.18   23.61
   1  -4   1 1806.31   13.41
  -1   4  -1 1798.97   13.97
   1  -4   1 1789.89   10.96
   1  -4   2 2876.57   15.49
   1  -4   2 2840.85   16.73
  -1   4  -2 2828.29   17.26
   1  -4   3  102.43    3.24
  -1   4  -3   90.99    3.08
  -1   4  -4   10.01    1.12
   1  -4   4   11.04    1.26
  -1   4  -4   11.80    1.03
  -1   4  -5   53.59    2.06
   1  -4   5   52.19    2.79
  -1   4  -5   54.61    2.57
  -1   4  -6  362.33    5.45
  -1   4  -6  339.06    6.74
   1  -4   6  341.94    7.61
   1  -4   7   32.54    2.55
  -1   4  -7   37.34    2.42
  -1   4  -8  145.22    4.90
   1  -4   8  132.59    5.34
   1  -4   9   54.60    3.62
  -1   4  -9   59.94    3.42
   1  -4  10   35.47    2.98
   1  -4  11    2.70    1.45
  -1   3  11    6.50    1.44
  -1   3  10  105.71    4.57
  -1   3   9   97.56    4.18
  -1   3   8  107.82    4.10
  -1   3   7   42.76    2.40
  -1   3   6  106.97    3.44
  -1   3   5  196.88    4.12
  -1   3   4  126.68    3.61
   1  -3  -4  129.41    3.44
  -1   3   3 2249.06   10.08
  -1   3   3 2149.86   18.40
  -1   3   3 2182.04   14.07
   1  -3  -3 2245.93   11.68
  -1   3   2   28.56    0.90
   1  -3  -2   28.99    1.05
  -1   3   2   28.35    2.05
  -1   3   2   25.68    1.50
   1  -3  -1  393.35    5.41
   1  -3  -1  406.38    2.71
  -1   3   1  390.69    5.88
   1  -3  -1  400.34    6.26
   1  -3  -1  402.43    7.11
  -1   3   1  398.19    5.08
  -1   3   1  381.64    6.49
   1  -3   0  356.24    2.55
   1  -3   0  358.64    5.05
  -1   3   0  343.92    4.74
   1  -3   0  348.93    5.79
  -1   3   0  355.00    5.78
   1  -3   1  833.77    9.26
   1  -3   1  831.39    9.26
   1  -3   1  824.45    7.82
   1  -3   1  805.93    6.30
  -1   3  -1  815.73    8.35
  -1   3  -1  813.04    7.02
  -1   3  -1  815.06    8.40
  -1   3  -2  589.81    7.07
  -1   3  -2  581.97    5.82
   1  -3   3  609.37    7.45
  -1   3  -3  620.95    7.37
  -1   3  -3  620.26    6.17
  -1   3  -4  187.67    4.28
  -1   3  -4  197.44    3.41
   1  -3   4  188.17    4.55
   1  -3   5  437.04    7.73
  -1   3  -5  438.09    4.92
  -1   3  -6  451.67    7.45
   1  -3   6  459.39    8.49
  -1   3  -6  461.81    4.78
  -1   3  -7  127.27    4.15
   1  -3   7  123.60    4.60
  -1   3  -7  121.64    1.98
  -1   3  -8  357.47    7.46
   1  -3   8  319.30    7.99
  -1   3  -9   10.89    1.47
   1  -3   9   10.98    1.60
   1  -3  10   11.04    2.05
   1  -3  11   13.57    2.28
  -1   2  12   74.58    4.58
  -1   2  11   50.34    3.52
  -1   2  10   31.15    2.63
  -1   2   9  247.47    6.65
  -1   2   8  111.09    4.19
  -1   2   7    3.32    0.60
  -1   2   7    3.99    0.97
  -1   2   6  706.84    6.81
  -1   2   6  749.03    9.13
  -1   2   5  505.29    5.52
  -1   2   4 1278.95    8.67
   1  -2  -4 1282.09   11.56
   1  -2  -3 3399.82   15.41
  -1   2   3 3352.66   13.02
   1  -2  -2  159.24    2.54
  -1   2   2  151.11    2.98
  -1   2   2  151.99    2.74
  -1   2   2  154.67    4.11
   1  -2  -1  893.86    7.40
  -1   2   1  903.10    8.97
   1  -2  -1  945.64    9.53
  -1   2   1  897.56    7.21
   1  -2  -1  936.20    6.74
  -1   2   1  930.29    6.71
   1  -2   0  316.62    4.55
   1  -2   0  309.30    5.04
  -1   2   0  328.28    4.35
   1  -2   0  315.23    3.88
  -1   2   0  324.37    3.84
  -1   2   0  302.68    4.64
  -1   2  -1    8.56    0.63
   1  -2   1    7.19    0.78
   1  -2   1    8.15    0.72
  -1   2  -1    7.42    0.73
   1  -2   1    8.27    0.57
  -1   2  -1    7.37    0.70
   1  -2   2 1154.59    9.02
  -1   2  -2 1142.61    6.62
  -1   2  -2 1128.60    8.68
   1  -2   2 1156.78    8.07
   1  -2   3  558.39    6.55
  -1   2  -3  574.93    4.65
  -1   2  -3  555.70    7.12
  -1   2  -3  546.66    6.34
   1  -2   3  559.71    6.69
  -1   2  -3  551.69    6.40
  -1   2  -4  377.20    6.81
  -1   2  -4  383.84    3.66
  -1   2  -4  374.33    5.54
   1  -2   5 1520.66   13.62
  -1   2  -5 1536.89    6.87
  -1   2  -5 1501.77   12.15
   1  -2   6  259.26    5.97
  -1   2  -6  251.02    2.13
  -1   2  -6  257.95    5.37
  -1   2  -7   59.52    2.79
   1  -2   7   55.38    3.13
  -1   2  -8    6.47    1.12
   1  -2   8    3.90    1.08
   1  -2   9  124.14    4.97
   1  -2  10  530.90   11.11
   1  -2  12  624.07   12.83
  -1   1  12   26.31    2.82
  -1   1  11    1.40    1.20
  -1   1  10    8.57    1.43
  -1   1   9    1.56    0.90
  -1   1   8   21.63    1.99
  -1   1   8   23.17    1.18
  -1   1   7  132.21    2.60
  -1   1   7  128.87    4.28
  -1   1   6  155.34    4.42
  -1   1   6  155.75    2.69
  -1   1   5 2920.50   11.10
  -1   1   4  229.93    4.38
   1  -1  -4  226.08    5.14
  -1   1   4  225.75    3.05
  -1   1   3 7583.40   22.04
   1  -1  -3 7705.46   24.12
   1  -1  -1  913.93    7.87
   1  -1  -1  901.17    5.40
  -1   1   1  926.86    7.83
  -1   1   1  904.17    5.15
   1  -1  -1  955.79    4.82
  -1   1   1  943.07    4.27
   1  -1   0 1875.98    7.12
  -1   1   0 1894.98    7.44
   1  -1   0 1902.85   10.13
  -1   1   0 1889.78    9.66
   1  -1   1 8953.62   13.93
   1  -1   1 9210.24   20.77
   1  -1   2 3986.50   14.34
   1  -1   2 3963.41   13.27
  -1   1  -2 3955.20   14.14
   1  -1   3  413.26    5.12
  -1   1  -3  404.33    4.85
   1  -1   3  415.39    5.23
   1  -1   4  402.00    5.95
   1  -1   4  420.60    5.79
  -1   1  -4  408.27    2.54
  -1   1  -4  399.69    6.51
  -1   1  -4  403.59    5.47
   1  -1   5   73.93    2.90
  -1   1  -5   70.74    2.54
   1  -1   6   76.70    3.17
  -1   1  -6   76.01    2.87
  -1   1  -7  159.39    4.46
   1  -1   7  148.32    4.63
   1  -1   8    2.85    1.02
   1  -1   9   74.83    3.93
   1  -1  11   71.31    4.18
   1  -1  12   15.55    2.29
  -1   0  12   20.15    2.50
  -1   0  11    3.37    1.19
  -1   0  10    7.14    1.50
  -1   0   9  419.57    8.94
  -1   0   8   40.94    0.99
  -1   0   8   37.35    2.67
  -1   0   7  192.82    5.55
  -1   0   7  205.32    2.43
  -1   0   6  128.08    4.35
  -1   0   6  133.07    1.98
  -1   0   5  273.34    5.63
  -1   0   4  553.03    7.41
  -1   0   3 2914.86   15.50
  -1   0   2   54.63    1.77
  -1   0   1 3719.01   12.37
  -1   0   0  959.63    4.92
   1   0   0  981.16    5.13
  -1   0  -1 5075.68   11.72
   1   0   1 5151.44   11.69
   1   0   2   12.47    0.78
  -1   0  -2   11.56    0.73
   1   0   2   12.42    0.75
  -1   0  -2   12.72    0.74
  -1   0  -3  107.08    2.69
  -1   0  -3   97.62    2.28
   1   0   3  107.53    2.43
   1   0   3  110.77    2.60
  -1   0  -3   96.68    1.37
  -1   0  -4  968.27    8.34
   1   0   4  973.78    8.50
   1   0   4  972.58    8.81
  -1   0  -5   53.74    2.18
   1   0   5   49.71    2.31
   1   0   9   60.97    3.33
   1   0  10   17.94    2.01
   1   0  11   97.48    4.86
   1   0  12  120.57    5.78
  -1  -1  12    3.63    1.59
  -1  -1  11    9.16    1.85
  -1  -1  10   -0.60    1.13
  -1  -1   9 1840.32   19.93
  -1  -1   8   57.08    3.42
  -1  -1   7  139.97    5.08
  -1  -1   6    2.57    0.28
  -1  -1   6    2.84    0.99
  -1  -1   5  774.77    4.85
  -1  -1   5  779.11   10.13
  -1  -1   4 1391.69   12.73
  -1  -1   4 1389.47    9.50
  -1  -1   4 1414.40    6.87
   1   1  -3   17.93    0.81
  -1  -1   3   20.21    0.84
  -1  -1   3   18.54    0.95
  -1  -1   3   18.55    1.37
  -1  -1   2 3762.55   10.78
   1   1  -2 3809.59    9.86
   1   1  -1 1874.46    6.72
   1   1  -1 1862.16    7.97
  -1  -1   0   37.78    1.10
   1   1   0   37.57    1.13
  -1  -1  -1 2255.54    8.46
   1   1   1 2253.28    8.45
  -1  -1  -2   -0.07    0.21
  -1  -1  -2    0.25    0.30
   1   1   2    0.42    0.27
   1   1   2    0.56    0.22
  -1  -1  -3    0.45    0.37
   1   1   3    0.92    0.34
   1   1   3    0.30    0.33
   1   1   3    1.07    0.30
  -1  -1  -3    0.45    0.22
   1   1   4 4740.00   18.22
   1   1   4 4832.82   12.95
   1   1   4 4816.68   19.22
  -1  -1  -4 4703.94   20.37
  -1  -1  -4 4692.98   10.77
   1   1   5  254.42    3.03
  -1  -1  -5  248.66    2.46
   1   1   6   46.07    2.31
   1   1   6   49.10    1.32
   1   1   7    4.48    0.93
   1   1   7    4.46    0.41
   1   1   8  173.41    5.25
   1   1   9   29.11    2.42
   1   1  10    5.91    1.45
   1   1  11   48.79    3.44
   1   1  12   13.67    2.09
  -1  -2  12   14.29    2.22
  -1  -2  11    5.88    1.63
  -1  -2  10  247.42    7.89
  -1  -2   9   53.87    3.60
  -1  -2   8  122.54    5.18
  -1  -2   7   74.93    3.79
  -1  -2   6   27.72    0.68
  -1  -2   5  461.97    6.14
  -1  -2   5  459.89    3.61
   1   2  -5  465.29    5.95
  -1  -2   4 1637.31   14.63
  -1  -2   4 1656.22   10.28
   1   2  -4 1636.62   10.38
  -1  -2   4 1632.74    7.55
  -1  -2   3  972.07    6.85
   1   2  -3  964.64    6.75
   1   2  -3  959.25    6.90
  -1  -2   3  962.54    5.99
  -1  -2   2 3172.80   10.31
   1   2  -2 3133.73   12.08
   1   2  -2 3106.55    9.72
  -1  -2   2 3119.77   11.73
  -1  -2   2 3172.07   13.53
  -1  -2   2 3059.06   11.08
  -1  -2   1    3.78    0.29
   1   2  -1    4.00    0.54
   1   2  -1    3.47    0.27
  -1  -2   1    3.75    0.43
  -1  -2   1    4.27    0.51
   1   2  -1    3.87    0.48
  -1  -2   1    4.06    0.57
   1   2   0  309.74    3.72
   1   2   0  305.93    2.56
   1   2   0  313.34    4.11
  -1  -2   0  306.18    3.58
  -1  -2   0  306.11    2.76
   1   2   1   46.95    1.26
  -1  -2  -1   43.72    1.43
  -1  -2  -1   45.81    1.25
   1   2   1   44.36    1.44
   1   2   2 2698.22   10.33
   1   2   2 2771.82   11.27
   1   2   3  656.98    5.71
   1   2   3  635.90    5.93
  -1  -2  -3  639.99    5.26
  -1  -2  -3  661.10    6.30
  -1  -2  -4  542.57    6.61
   1   2   4  565.74    5.42
  -1  -2  -4  561.75    4.79
   1   2   4  539.42    6.34
  -1  -2  -5 1896.42    9.16
   1   2   5 1941.79   10.33
  -1  -2  -6    3.82    0.45
   1   2   6    2.82    0.49
   1   2   7  791.16    7.05
   1   2   7  764.61   10.16
   1   2   8   91.05    3.80
   1   2   8   88.43    2.36
   1   2   9  650.42   10.82
   1   2  10   44.81    3.00
   1   2  11  251.35    7.40
   1   2  12    6.76    1.62
  -1  -3  11  101.20    5.59
  -1  -3  10   21.29    2.51
  -1  -3   9    2.31    1.19
  -1  -3   8   11.89    1.77
  -1  -3   7    5.45    1.33
  -1  -3   6   14.57    1.78
  -1  -3   6   12.67    0.63
  -1  -3   5    4.91    0.49
  -1  -3   5    5.63    1.17
   1   3  -5    5.37    0.66
  -1  -3   4    2.27    0.48
  -1  -3   4    2.90    0.44
  -1  -3   4    4.00    0.79
   1   3  -4    2.16    0.46
   1   3  -4    2.59    0.53
   1   3  -4    1.78    0.57
  -1  -3   4    2.70    0.95
  -1  -3   3  932.92    7.24
  -1  -3   3  911.17    7.95
  -1  -3   3  905.48    9.34
   1   3  -3  910.30    6.85
   1   3  -3  934.78    8.97
   1   3  -3  927.27    7.74
  -1  -3   3  908.77    6.81
  -1  -3   2  664.19    5.47
   1   3  -2  662.79    6.53
  -1  -3   2  669.30    5.87
  -1  -3   2  669.23    7.71
  -1  -3   2  653.63    6.62
  -1  -3   1  131.43    2.39
   1   3  -1  131.75    2.16
  -1  -3   1  129.41    2.67
   1   3  -1  131.04    3.24
   1   3  -1  129.63    2.81
  -1  -3   1  137.76    3.15
   1   3   0   27.75    1.54
   1   3   0   22.98    1.03
  -1  -3   0   23.55    1.21
  -1  -3   0   25.93    1.21
   1   3   0   25.05    1.29
   1   3   1 1388.22    9.60
   1   3   1 1400.08    7.56
   1   3   1 1429.69    9.55
  -1  -3  -1 1452.98    7.92
  -1  -3  -1 1415.88    9.03
  -1  -3  -2 1368.27    8.17
   1   3   2 1374.30    9.52
   1   3   2 1336.11    7.92
  -1  -3  -2 1348.83    8.73
   1   3   3 1074.30    8.63
   1   3   3 1066.53    7.84
  -1  -3  -3 1069.33    7.82
  -1  -3  -4  158.97    3.66
   1   3   4  167.97    3.52
   1   3   4  161.52    3.49
  -1  -3  -5  291.46    4.28
   1   3   5  298.83    4.78
   1   3   5  288.74    5.13
  -1  -3  -6  172.40    3.30
   1   3   6  165.04    4.23
   1   3   6  169.16    3.72
   1   3   7    8.35    1.13
   1   3   7    9.39    1.00
   1   3   8  453.20    8.24
   1   3   9   30.74    2.27
   1   3  10   88.69    4.19
   1   3  11  130.41    5.33
   1   3  12   20.39    2.35
  -1  -4  11  190.34    7.71
  -1  -4  10    2.47    1.41
  -1  -4   9   28.04    2.87
  -1  -4   8    9.17    1.72
  -1  -4   7   52.68    3.44
   1   4  -6   14.68    1.34
   1   4  -6   12.50    1.11
  -1  -4   6   13.00    1.90
  -1  -4   6   15.30    0.88
   1   4  -5    0.16    0.40
  -1  -4   5    0.92    0.32
   1   4  -5    0.08    0.47
  -1  -4   5    1.40    0.96
  -1  -4   4 2653.83   12.54
   1   4  -4 2640.73   14.07
  -1  -4   4 2674.70   15.31
   1   4  -4 2652.86   15.31
  -1  -4   4 2669.85   20.82
  -1  -4   3   45.86    1.70
   1   4  -3   47.25    1.69
   1   4  -3   47.37    2.08
  -1  -4   3   48.49    2.15
  -1  -4   3   47.31    1.89
   1   4  -2  344.89    4.43
   1   4  -2  332.10    5.44
  -1  -4   2  352.94    4.88
  -1  -4   2  339.25    4.89
  -1  -4   1   23.38    1.52
   1   4  -1   21.24    1.44
   1   4  -1   20.55    1.10
   1   4  -1   21.91    1.60
  -1  -4   1   24.50    1.32
  -1  -4   1   23.39    1.32
  -1  -4   0 3396.30   16.67
   1   4   0 3350.39   14.79
  -1  -4   0 3369.98   13.20
  -1  -4   0 3298.42   15.62
   1   4   0 3330.46   16.76
   1   4   0 3399.78   19.27
   1   4   1 1767.65   12.46
   1   4   1 1741.50   12.27
   1   4   1 1880.55   14.61
  -1  -4  -1 1866.04   10.24
  -1  -4  -1 1787.83   11.28
  -1  -4  -2  463.91    5.11
  -1  -4  -2  488.23    6.05
   1   4   2  462.52    7.03
   1   4   2  498.53    5.18
  -1  -4  -3   77.09    2.31
   1   4   3   82.35    2.30
  -1  -4  -3   83.63    2.54
  -1  -4  -4 1507.23   10.78
   1   4   4 1466.75   10.48
  -1  -4  -5  497.65    6.31
   1   4   5  524.71    7.01
   1   4   6   16.63    1.43
  -1  -4  -6   15.22    1.14
  -1  -4  -7   38.93    1.82
   1   4   7   36.88    2.19
   1   4   8   32.03    2.21
   1   4   9    6.91    1.17
   1   4  10   20.31    2.10
   1   4  11   41.98    3.02
   1   4  12  115.47    5.36
  -1  -5  10  482.13   12.27
  -1  -5   9    4.00    1.47
  -1  -5   8  446.84   10.61
   1   5  -7    2.82    0.77
  -1  -5   7    1.35    1.16
  -1  -5   6    0.16    0.36
  -1  -5   6    0.78    0.98
   1   5  -6   -0.09    0.49
  -1  -5   5   10.05    1.64
   1   5  -5   11.39    1.12
   1   5  -4   83.23    2.65
  -1  -5   4   91.87    4.01
   1   5  -3  189.37    3.73
  -1  -5   3  188.66    3.98
  -1  -5   3  186.50    4.75
  -1  -5   3  198.15    4.43
   1   5  -2  485.51    5.86
  -1  -5   2  500.87    7.02
  -1  -5   2  489.46    7.42
   1   5  -1    0.75    0.64
   1   5  -1    0.31    0.31
  -1  -5   1    1.31    0.54
  -1  -5   1    1.50    0.58
  -1  -5   1    0.63    0.52
   1   5   0  521.13    6.66
  -1  -5   0  527.87    7.06
  -1  -5   0  530.91    5.83
  -1  -5   0  530.10    7.62
   1   5   1  222.01    5.51
  -1  -5  -1  206.37    3.75
   1   5   1  216.44    4.77
  -1  -5  -1  217.05    4.50
   1   5   2  542.60    8.48
   1   5   2  562.21    9.13
  -1  -5  -2  530.05    5.98
   1   5   2  516.46    5.67
  -1  -5  -2  545.44    7.08
   1   5   3   12.91    1.55
  -1  -5  -3   14.83    1.20
   1   5   3   14.96    1.07
  -1  -5  -3   12.30    1.05
   1   5   3   15.44    1.61
   1   5   4    0.96    0.76
  -1  -5  -4    1.48    0.55
   1   5   5  255.24    4.90
  -1  -5  -5  246.62    4.97
  -1  -5  -6  707.63    8.51
   1   5   6  691.59    8.64
  -1  -5  -7   51.91    2.37
   1   5   7   49.74    2.56
   1   5   8   16.27    1.64
   1   5   9   80.64    3.75
   1   5  10   27.77    2.39
   1   5  11   77.90    4.11
   1   5  12    1.26    1.26
  -1  -6   9   -0.14    1.35
  -1  -6   8   38.03    3.38
  -1  -6   7   61.20    4.05
   1   6  -7   69.67    3.14
   1   6  -6   20.82    1.65
  -1  -6   6   25.87    1.52
   1   6  -5  308.62    5.88
  -1  -6   5  295.65    8.03
  -1  -6   5  296.15    5.22
   1   6  -4  520.66    7.10
  -1  -6   4  511.38    6.96
  -1  -6   3  101.99    3.89
  -1  -6   3  101.55    3.18
   1   6  -3   98.96    3.06
   1   6  -2  267.62    4.96
  -1  -6   2  276.80    6.23
  -1  -6   2  287.52    5.39
  -1  -6   1  255.22    5.90
  -1  -6   1  270.02    5.33
   1   6  -1  268.03    5.03
   1   6   0    4.45    1.04
   1   6   0    3.85    0.76
  -1  -6   0    5.56    0.88
  -1  -6  -1  283.60    5.54
   1   6   1  271.68    6.64
   1   6   1  285.76    6.07
   1   6   2  345.49    7.13
   1   6   2  345.46    7.65
  -1  -6  -3   82.08    3.12
   1   6   3   78.28    3.79
   1   6   4    1.44    0.99
  -1  -6  -4    4.71    0.89
   1   6   4    2.84    1.04
   1   6   4    3.31    0.62
   1   6   5   25.68    2.48
   1   6   5   31.84    1.82
  -1  -6  -5   30.99    2.00
   1   6   5   26.79    2.41
  -1  -6  -6 1245.07   12.25
   1   6   6 1265.69   18.13
   1   6   6 1232.10   11.86
   1   6   7  356.03    6.78
   1   6   8  227.79    5.87
   1   6   9    5.13    1.26
   1   6  10   24.45    2.22
   1   6  11   43.67    3.22
  -1  -7   8    6.87    1.95
   1   7  -7  129.77    4.49
  -1  -7   7  128.65    5.95
  -1  -7   6   38.21    3.34
   1   7  -6   44.28    2.51
  -1  -7   5    0.38    0.96
  -1  -7   5    1.43    0.55
   1   7  -5    0.32    0.53
  -1  -7   4 1003.49   10.57
   1   7  -4 1001.90   10.77
  -1  -7   4 1006.56   14.99
  -1  -7   3  142.64    4.05
  -1  -7   3  147.53    4.98
   1   7  -3  141.29    3.97
  -1  -7   2    0.28    0.55
  -1  -7   2    0.42    0.78
   1   7  -2    0.04    0.55
   1   7  -1    2.90    0.74
  -1  -7   1    1.96    0.61
   1   7   0   86.06    4.13
   1   7   0   81.14    3.25
  -1  -7   0   82.90    3.32
  -1  -7  -1    0.82    0.54
   1   7   1    0.79    0.74
  -1  -7  -1    0.05    0.72
   1   7   1    1.28    0.73
   1   7   2   84.57    3.78
  -1  -7  -2   85.92    3.44
   1   7   2   81.03    4.01
  -1  -7  -3  102.31    3.66
   1   7   3  107.09    4.72
   1   7   3  106.23    4.57
   1   7   4    2.33    0.65
   1   7   4    3.12    1.35
  -1  -7  -4    1.35    0.64
   1   7   4    2.18    0.97
   1   7   5  557.37    7.66
   1   7   5  584.68   11.53
   1   7   5  580.08   12.05
  -1  -7  -5  587.54    8.99
   1   7   6   67.10    4.19
   1   7   6   58.64    2.71
  -1  -7  -6   57.37    2.96
   1   7   6   59.84    4.21
   1   7   7   89.52    3.53
   1   7   7   84.46    5.20
   1   7   7   86.03    4.83
   1   7   8  132.37    6.97
   1   7   8  125.77    5.90
   1   7   8  123.71    4.35
   1   7   9  114.38    6.93
   1   7   9   95.16    4.04
   1   7  10  118.76    4.76
   1   7  10  149.33    8.41
  -1  -8   7    8.58    2.02
  -1  -8   6    1.06    1.38
   1   8  -5   53.09    2.75
  -1  -8   5   62.67    4.04
  -1  -8   4    0.89    0.71
   1   8  -4    1.89    0.81
  -1  -8   4    1.62    1.32
   1   8  -3  502.81    8.05
  -1  -8   3  497.21    8.30
  -1  -8   3  494.25    9.59
  -1  -8   2   29.15    2.09
   1   8  -2   33.94    2.14
  -1  -8   2   34.51    2.61
  -1  -8   1    9.58    1.52
   1   8  -1   11.55    1.34
  -1  -8   1    9.17    1.30
  -1  -8   0   23.37    2.15
  -1  -8   0   18.79    1.79
   1   8   0   24.43    1.96
   1   8   1  933.81   14.70
   1   8   1  906.60   12.15
  -1  -8  -1  898.89   11.87
   1   8   2  455.67    9.26
  -1  -8  -2  439.68    9.49
  -1  -8  -2  434.76    8.11
   1   8   3  769.77   12.72
  -1  -8  -3  732.48   10.69
   1   8   3  753.23   13.29
  -1  -8  -4   32.72    2.36
   1   8   4   33.00    3.00
   1   8   4   29.15    2.70
   1   8   5   19.83    2.61
   1   8   5   16.07    2.20
  -1  -8  -5   13.04    1.55
   1   8   5   16.49    1.45
   1   8   6   59.94    4.44
   1   8   6   59.55    4.16
   1   8   6   55.52    2.66
   1   8   7   52.57    4.27
   1   8   7   55.44    4.14
   1   8   7   54.02    2.83
   1   8   8   14.39    2.37
   1   8   8    9.07    1.38
   1   8   8   13.08    2.58
   1   8   9    3.86    2.15
   1   8   9    2.83    1.42
  -1  -9   6    0.92    1.57
  -1  -9   5   36.55    3.24
  -1  -9   4  176.10    6.56
  -1  -9   3   42.40    3.30
  -1  -9   3   42.15    2.72
  -1  -9   3   42.99    3.14
   1   9  -3   43.25    2.64
   1   9  -2  107.94    4.09
  -1  -9   2  109.31    4.38
  -1  -9   2  103.20    4.83
  -1  -9   1    6.49    1.14
  -1  -9   1    5.89    1.43
   1   9  -1    7.06    1.19
  -1  -9   0   21.18    2.28
   1   9   0   20.18    1.96
  -1  -9   0   25.85    2.17
   1   9   1  204.25    6.14
  -1  -9  -1  205.36    6.66
  -1  -9  -1  220.49    6.27
  -1  -9  -2  312.90    7.64
  -1  -9  -2  297.16    8.17
   1   9   2  324.47    8.20
   1   9   3  413.68   10.61
   1   9   3  419.29    9.90
  -1  -9  -3  384.59    9.47
   1   9   4   -1.50    1.27
  -1  -9  -4    1.61    0.95
  -1  -9  -4    0.62    1.33
   1   9   4   -0.78    1.09
   1   9   5  143.16    6.46
   1   9   5  143.50    6.42
   1   9   6    0.93    1.21
   1   9   6    1.40    1.51
   1   9   7   34.81    3.90
   1   9   7   24.07    3.05
   1   9   8   25.89    3.16
   1   9   8   32.73    4.01
  -1 -10   3   13.41    2.02
  -1 -10   2   66.02    4.11
   1  10  -1    2.01    0.99
  -1 -10   0   12.27    2.06
   1  10   0    9.80    1.56
   1  10   1  113.58    4.89
  -1 -10  -1  106.18    5.09
   1  10   2   28.24    2.67
  -1 -10  -2   25.96    2.70
   1  10   3    0.73    1.00
  -1 -10  -3    0.60    1.16
   1  10   3    1.49    1.23
   1  10   4   27.68    3.20
   1  10   4   27.58    2.97
  -1 -10  -4   32.30    3.12
   1  10   5   78.06    5.19
   1  10   5   83.42    5.25
  -1 -10  -5   82.31    4.94
   1  10   6  251.06    9.30
  -1 -10  -6  248.38    8.63
   1  10   6  262.20    9.51
  -2   9   4   34.80    3.53
   2  -9  -3   39.10    3.33
  -2   9   3   45.50    3.86
  -2   9   2   92.48    5.19
   2  -9  -2   89.87    4.77
  -2   9   1   25.24    2.80
   2  -9  -1   29.21    2.73
  -2   9   0    3.02    1.34
  -2   9  -1    2.15    1.18
  -2   9  -2   78.25    4.49
  -2   9  -3   11.88    1.88
  -2   9  -4   19.29    2.35
  -2   8   6  205.37    8.71
   2  -8  -6  197.81    6.35
  -2   8   5    6.03    1.73
   2  -8  -5    5.07    1.54
  -2   8   4   11.76    2.21
   2  -8  -4   12.33    1.72
  -2   8   3   34.49    3.20
   2  -8  -3   28.54    2.57
  -2   8   2  149.20    6.21
   2  -8  -2  162.07    5.81
   2  -8  -1    0.82    0.97
  -2   8   1    2.18    1.25
   2  -8   0   64.17    3.65
  -2   8   0   67.55    3.99
  -2   8  -1  341.35    8.74
  -2   8  -2    8.55    1.59
  -2   8  -3  143.78    5.59
  -2   8  -4   82.59    4.28
  -2   8  -5   15.87    2.11
  -2   8  -6  328.81    8.69
  -2   7   8    2.53    1.95
  -2   7   7   29.28    3.65
  -2   7   6    3.01    1.54
   2  -7  -6    5.75    1.29
  -2   7   5   31.62    3.18
   2  -7  -5   32.34    2.48
  -2   7   4  168.34    6.89
   2  -7  -4  176.04    5.55
  -2   7   3   58.58    3.99
   2  -7  -3   61.05    3.28
   2  -7  -2  203.16    5.96
  -2   7   2  187.51    6.75
   2  -7  -1  182.06    5.67
  -2   7   1  187.96    6.44
  -2   7   0   37.26    2.86
   2  -7   0   33.68    2.54
  -2   7  -1   40.78    2.92
  -2   7  -2   37.54    2.79
  -2   7  -3    1.32    0.77
   2  -7   3    1.33    0.73
  -2   7  -4   56.99    3.37
   2  -7   4   50.46    2.64
  -2   7  -5    0.38    0.82
   2  -7   5   -0.24    0.79
   2  -7   6  206.95    5.92
  -2   7  -6  215.39    6.69
   2  -7   7    7.61    1.48
  -2   7  -7   10.12    1.70
   2  -7   8   79.06    4.34
  -2   7  -8   82.29    4.49
  -2   6   9   89.55    6.55
   2  -6  -7   54.72    2.92
  -2   6   7   56.52    4.68
  -2   6   7   52.79    3.21
  -2   6   6  235.15    8.85
   2  -6  -6  228.03    5.97
  -2   6   6  233.01    6.75
  -2   6   5    3.96    1.43
   2  -6  -5    4.16    1.13
  -2   6   4    2.96    1.16
   2  -6  -4    0.31    0.73
  -2   6   3  939.80   14.77
   2  -6  -3  938.69   11.85
  -2   6   2  177.66    6.23
   2  -6  -2  180.50    5.15
  -2   6   1   20.88    2.19
  -2   6   0   15.12    1.80
   2  -6   0   12.82    1.58
   2  -6   1   58.00    1.46
   2  -6   1   60.36    1.66
  -2   6  -1   56.08    3.18
   2  -6   2  204.75    3.82
  -2   6  -2  184.48    5.65
   2  -6   3   56.19    2.37
  -2   6  -3   62.10    3.30
   2  -6   4  119.25    3.83
  -2   6  -4  119.92    4.53
   2  -6   5  164.69    4.95
  -2   6  -5  170.68    5.58
  -2   6  -6   21.65    2.09
   2  -6   6   18.71    1.90
   2  -6   7  335.62    7.89
  -2   6  -7  359.22    8.24
  -2   6  -8    6.62    1.42
   2  -6   8    7.79    1.59
  -2   6  -9    5.28    1.39
   2  -6   9    4.45    1.44
  -2   5  10   27.39    4.04
  -2   5   9   20.74    3.26
  -2   5   8   16.00    2.76
  -2   5   8   15.84    1.52
  -2   5   7    0.01    0.70
   2  -5  -7    0.53    0.68
  -2   5   7    0.62    0.62
  -2   5   7   -1.34    1.41
  -2   5   6    2.22    0.88
  -2   5   6    4.24    0.82
   2  -5  -6    3.06    0.82
  -2   5   5   33.43    2.38
  -2   5   5   32.42    3.14
   2  -5  -5   28.53    1.96
  -2   5   5   28.79    1.41
   2  -5  -4   64.66    2.91
  -2   5   4   61.41    1.65
  -2   5   3 1969.79   20.42
   2  -5  -3 2000.61   15.40
   2  -5  -2  817.41    9.86
  -2   5   2  798.73   12.57
  -2   5   1  164.90    5.33
   2  -5  -1  162.95    4.45
   2  -5   0  242.34    5.49
  -2   5   0  239.48    6.26
   2  -5   1   26.20    0.93
  -2   5  -1   32.13    2.24
   2  -5   1   30.36    1.13
   2  -5   2  763.15    7.11
  -2   5  -2  733.83   10.56
   2  -5   3  154.18    3.77
  -2   5  -3  159.58    4.91
  -2   5  -4   77.73    3.44
   2  -5   4   78.66    3.03
   2  -5   5  323.10    6.66
  -2   5  -5  322.01    7.10
   2  -5   6    7.53    1.37
  -2   5  -6    7.95    1.34
   2  -5   7   13.76    1.75
  -2   5  -7   18.31    1.92
  -2   5  -8    5.77    1.28
   2  -5   8    5.66    1.41
  -2   5  -9    1.34    1.06
   2  -5   9    0.14    1.06
  -2   5 -10    0.80    1.15
  -2   4  10   43.37    2.92
  -2   4  10   52.36    5.07
  -2   4   9   45.98    4.59
  -2   4   9   33.72    2.42
  -2   4   8   32.97    2.25
  -2   4   8   38.99    3.82
  -2   4   7  142.49    6.84
  -2   4   7  131.83    3.96
  -2   4   7  133.16    4.19
  -2   4   6   25.30    1.61
  -2   4   6   28.12    3.05
  -2   4   5  218.41    7.46
   2  -4  -5  224.15    4.84
  -2   4   5  208.31    4.04
   2  -4  -4   15.74    1.33
  -2   4   4   13.88    0.89
  -2   4   3   69.89    3.73
   2  -4  -3   68.09    2.59
  -2   4   3   69.84    1.48
  -2   4   2   53.98    3.07
   2  -4  -2   52.46    2.29
  -2   4   1 2250.04   18.68
   2  -4  -1 2234.70   14.83
  -2   4   0   15.84    1.58
   2  -4   0   17.33    1.42
   2  -4   1 1210.89    6.07
  -2   4  -1 1187.56   12.55
   2  -4   2  183.77    3.30
  -2   4  -2  169.47    4.69
  -2   4  -3  327.14    6.50
   2  -4   3  314.23    5.05
  -2   4  -4    2.11    0.70
   2  -4   4    2.08    0.62
  -2   4  -5    1.13    0.65
   2  -4   5    1.43    0.71
   2  -4   6    9.49    1.32
  -2   4  -6    7.53    1.20
   2  -4   7   74.52    3.54
  -2   4  -7   79.55    3.67
  -2   4  -8   51.00    3.06
   2  -4   8   45.70    2.99
  -2   4  -9   18.55    2.01
   2  -4   9   18.34    2.18
  -2   4 -10   32.39    2.80
   2  -4  11    8.07    1.75
  -2   4 -11   10.82    1.74
  -2   3  11    6.55    1.66
  -2   3  10    2.15    1.10
  -2   3   9  354.85    8.02
  -2   3   8  658.52    8.81
  -2   3   8  685.29   10.35
  -2   3   7 1155.15   12.41
  -2   3   7 1135.52   11.16
  -2   3   6  225.29    7.69
  -2   3   6  210.00    4.62
  -2   3   6  212.78    4.87
  -2   3   5    2.21    1.01
  -2   3   5    3.38    0.72
  -2   3   5    3.21    0.73
  -2   3   4   77.36    3.99
  -2   3   4   72.93    2.59
  -2   3   3  652.24    5.20
   2  -3  -3  643.78    6.84
  -2   3   3  652.56   10.81
  -2   3   3  628.58    7.58
   2  -3  -2  538.18    6.13
  -2   3   2  532.65    3.12
   2  -3  -1  391.32    5.34
  -2   3   1  394.04    7.36
  -2   3   0 3145.29   17.29
  -2   3   0 3176.14   19.61
   2  -3   1  252.99    2.51
  -2   3  -1  231.40    5.12
   2  -3   2    1.23    0.37
  -2   3  -2    0.51    0.46
  -2   3  -3    0.25    0.34
  -2   3  -3    1.34    0.51
   2  -3   3    0.25    0.39
  -2   3  -4  741.37    9.19
   2  -3   4  745.22    8.30
  -2   3  -4  725.58    7.12
   2  -3   5   39.74    2.19
  -2   3  -5   45.28    2.43
  -2   3  -5   42.76    1.73
  -2   3  -6   10.26    0.88
  -2   3  -6   10.10    1.24
  -2   3  -7  349.24    4.33
  -2   3  -7  352.98    7.39
  -2   3  -8    0.32    0.68
   2  -3   8   -0.78    0.83
   2  -3   9   35.60    2.85
  -2   3  -9   38.77    2.78
  -2   3 -10  162.94    5.88
   2  -3  10  133.99    5.58
   2  -3  11  103.28    5.23
  -2   2  11    4.74    1.51
  -2   2  10   27.06    2.45
  -2   2   9   68.41    3.55
  -2   2   7  957.12   11.70
  -2   2   6   24.85    1.78
  -2   2   5  851.45   13.27
  -2   2   5  865.81    7.71
  -2   2   4 3058.34   14.86
  -2   2   4 2997.45   23.06
  -2   2   3  402.19    4.88
  -2   2   3  420.64    8.05
  -2   2   3  412.65    4.66
   2  -2  -3  419.09    4.44
  -2   2   2 2239.86   17.26
  -2   2   2 2266.51    8.59
   2  -2  -2 2245.87   10.25
   2  -2  -1    9.84    1.26
   2  -2  -1   10.60    0.80
   2  -2  -1   10.80    0.90
  -2   2   1   11.08    1.18
   2  -2   0   12.09    1.23
  -2   2   0   10.69    0.87
  -2   2   0    9.99    1.04
   2  -2   1   58.43    2.46
  -2   2  -1   57.46    2.31
   2  -2   1   59.88    1.12
  -2   2  -1   57.25    2.03
  -2   2  -1   54.05    1.32
   2  -2   2 1239.65    7.33
  -2   2  -2 1215.62   10.41
   2  -2   2 1237.35   10.97
  -2   2  -2 1221.03    8.43
  -2   2  -2 1238.97    9.83
  -2   2  -3  107.97    3.01
   2  -2   3  108.73    2.73
  -2   2  -4    0.06    0.38
  -2   2  -4   -0.18    0.26
  -2   2  -4    0.88    0.60
   2  -2   4    0.28    0.50
   2  -2   5   58.36    2.56
  -2   2  -5   56.04    2.49
  -2   2  -5   55.65    1.61
  -2   2  -6  479.09    7.73
  -2   2  -6  490.65    4.51
   2  -2   7   18.97    1.84
  -2   2  -7   22.40    1.88
  -2   2  -7   21.11    0.80
  -2   2  -8   38.68    2.51
  -2   2  -9  195.14    5.89
   2  -2   9  167.21    5.72
   2  -2  10   35.36    2.88
   2  -2  11  657.53   12.72
   2  -2  12  108.48    5.51
  -2   1  11   14.80    2.12
  -2   1  10    0.83    0.93
  -2   1   9   52.10    3.29
  -2   1   8  233.47    6.45
  -2   1   7   -0.32    0.65
  -2   1   6  484.81    8.04
  -2   1   6  451.78    5.36
  -2   1   5 2495.02   17.10
  -2   1   4 1478.61   11.66
  -2   1   4 1358.57    6.89
   2  -1  -3  300.31    2.61
  -2   1   3  284.00    6.23
  -2   1   3  309.73    4.73
  -2   1   3  280.50    2.75
  -2   1   2  798.77    6.63
   2  -1  -2  805.02    4.23
   2  -1  -1   48.62    2.23
   2  -1  -1   46.86    1.40
  -2   1   1   46.07    1.26
  -2   1   1   45.85    2.04
   2  -1   0  306.30    5.06
  -2   1   0  300.14    2.01
  -2   1   0  298.16    4.64
  -2   1   0  291.70    3.40
   2  -1   1 1044.66    8.76
  -2   1  -1 1068.65    5.10
   2  -1   1 1066.58    4.85
  -2   1  -1 1038.98    8.28
  -2   1  -2 1040.79    7.00
   2  -1   2 1051.93    6.63
   2  -1   2 1059.68    8.87
  -2   1  -3 1051.07    8.67
  -2   1  -3 1001.33    8.82
   2  -1   3 1037.86    8.02
   2  -1   3  991.54    9.07
  -2   1  -4    6.34    0.90
  -2   1  -4    4.83    0.75
   2  -1   4    4.00    0.67
   2  -1   5   64.66    2.58
  -2   1  -5   65.79    2.58
  -2   1  -6   91.52    3.26
  -2   1  -6   88.70    1.84
  -2   1  -6   90.45    1.48
  -2   1  -7   17.75    1.56
   2  -1   7   15.29    1.59
  -2   1  -8    1.47    0.69
   2  -1   8    2.66    0.92
   2  -1   9   13.63    1.74
   2  -1  10  520.76   10.47
   2  -1  11   41.50    3.34
   2  -1  12    1.16    1.17
  -2   0  11  168.59    6.74
  -2   0  10  214.46    7.00
  -2   0   9    6.89    1.56
  -2   0   8  732.18   11.84
  -2   0   7  109.26    4.42
  -2   0   7   87.89    2.18
  -2   0   6  421.06    7.95
  -2   0   5  634.00    9.21
  -2   0   4 2286.83   15.97
  -2   0   3  793.21    8.50
  -2   0   2 1738.79   12.13
   2   0  -1  556.60    6.27
  -2   0   1  544.93    6.01
   2   0   0 2855.03   12.78
  -2   0   0 2910.50    8.34
  -2   0  -1  255.61    2.71
   2   0   1  254.34    2.63
   2   0   1  256.23    3.64
  -2   0  -1  245.61    3.44
   2   0   3   73.57    2.25
  -2   0  -3   75.89    2.21
   2   0   3   73.76    2.11
  -2   0  -3   70.08    2.12
  -2   0  -4   84.09    2.60
  -2   0  -4   87.33    2.82
   2   0   4   84.59    2.68
   2   0   4   84.25    2.66
  -2   0  -4   84.37    1.99
  -2   0  -5    7.12    0.86
   2   0   5    8.18    1.01
  -2   0  -5    6.64    0.54
  -2   0  -6   90.00    3.19
  -2   0  -6   94.26    1.55
  -2   0  -7   23.25    1.78
   2   0   7   23.51    1.84
   2   0   8   81.27    3.68
   2   0   9   31.34    2.55
   2   0  10    1.12    0.99
   2   0  11  300.21    8.52
   2   0  12  337.13    9.40
  -2  -1  11   64.09    4.15
  -2  -1  10    6.65    1.66
  -2  -1   9  133.54    5.60
  -2  -1   8  584.55   11.29
  -2  -1   8  589.25    5.24
  -2  -1   7   16.73    1.91
   2   1  -7   16.47    1.13
  -2  -1   7   19.72    1.12
  -2  -1   6   31.30    2.46
   2   1  -6   32.71    1.38
  -2  -1   5   13.00    0.99
  -2  -1   5   10.02    1.46
   2   1  -5   10.29    0.70
  -2  -1   4   17.90    1.59
   2   1  -4   17.26    0.78
  -2  -1   4   15.57    0.80
  -2  -1   3    0.33    0.22
  -2  -1   2 3596.17    7.57
  -2  -1   1   39.18    1.29
  -2  -1   0 6268.56   19.08
  -2  -1   0 6200.48   12.75
   2   1   1   40.79    1.16
  -2  -1  -1   41.56    1.12
   2   1   1   41.28    1.21
  -2  -1  -2 1621.15    8.23
   2   1   2 1614.90    8.30
  -2  -1  -2 1675.16    8.37
   2   1   2 1679.73    8.51
  -2  -1  -2 1596.32    9.24
  -2  -1  -3  653.14    6.11
  -2  -1  -3  679.92    6.48
   2   1   3  689.13    6.35
   2   1   3  691.45    6.36
  -2  -1  -3  641.46    5.68
   2   1   4 2709.49   14.50
  -2  -1  -4 2658.96   14.49
  -2  -1  -4 2709.53   14.43
  -2  -1  -4 2663.41   11.10
   2   1   5  186.36    4.26
  -2  -1  -5  188.87    2.78
  -2  -1  -6  152.90    2.27
  -2  -1  -7   42.09    1.05
   2   1   8  210.83    5.85
   2   1   9   14.52    1.89
   2   1  10   45.21    3.13
   2   1  11   65.10    3.92
   2   1  12   16.31    2.20
   2   1  13   26.60    2.94
  -2  -2  11    4.91    1.75
  -2  -2  10   10.66    1.94
  -2  -2   9   96.67    4.90
  -2  -2   8   49.62    3.45
  -2  -2   7 1084.38   14.76
  -2  -2   7 1099.15    6.83
  -2  -2   6    0.81    0.36
  -2  -2   6    0.36    0.46
  -2  -2   6   -0.02    0.92
   2   2  -6    1.63    0.66
  -2  -2   5  165.67    3.68
  -2  -2   5  162.04    3.63
  -2  -2   5  190.09    5.58
   2   2  -5  184.32    3.61
  -2  -2   5  170.24    3.19
  -2  -2   4  802.57    7.34
  -2  -2   4  813.94    7.05
  -2  -2   4  816.86    7.01
  -2  -2   3   98.43    2.10
  -2  -2   3   99.87    2.48
  -2  -2   3   95.10    2.45
  -2  -2   2  373.46    3.22
  -2  -2   2  366.91    4.76
   2   2  -1  182.55    3.57
  -2  -2   1  173.79    3.28
   2   2   0 3172.77   14.80
  -2  -2   0 3138.80   14.08
   2   2   1  365.35    2.90
   2   2   1  400.37    4.15
  -2  -2  -1  365.63    4.73
   2   2   1  397.80    5.10
   2   2   2  722.79    5.63
   2   2   2  789.76    7.21
  -2  -2  -2  776.18    6.13
   2   2   2  756.19    6.13
  -2  -2  -2  739.35    6.54
   2   2   3    0.20    0.32
  -2  -2  -3    0.59    0.34
   2   2   3    0.17    0.34
   2   2   3    0.53    0.40
  -2  -2  -3   -0.01    0.35
   2   2   4  454.50    6.07
   2   2   4  455.42    5.86
  -2  -2  -4  447.73    6.09
  -2  -2  -4  449.51    4.99
   2   2   5  308.67    5.44
   2   2   5  307.66    4.60
  -2  -2  -5  304.04    4.01
   2   2   6 1660.60   13.73
  -2  -2  -6 1645.41    8.79
  -2  -2  -7  179.10    2.86
   2   2   7  175.54    3.55
   2   2   7  174.22    4.81
  -2  -2  -8 2237.04    9.52
   2   2   8 2186.39   12.17
   2   2   8 2202.28   18.31
   2   2   9  137.25    4.95
   2   2  10   23.39    2.15
   2   2  11    8.88    1.63
   2   2  12   63.91    4.09
   2   2  13   71.11    4.53
  -2  -3  11   10.09    2.03
  -2  -3  10    6.69    1.75
  -2  -3   9   41.02    3.36
  -2  -3   8  192.40    6.82
  -2  -3   7  208.94    6.93
  -2  -3   7  218.91    2.97
  -2  -3   6 1458.54    8.79
  -2  -3   5    5.83    0.88
  -2  -3   5    7.34    0.83
  -2  -3   5    7.60    0.72
  -2  -3   4  304.33    4.42
  -2  -3   4  300.54    4.29
  -2  -3   4  302.11    5.46
  -2  -3   3  289.95    3.55
   2   3  -3  283.98    4.86
  -2  -3   3  288.72    4.38
  -2  -3   2 1814.17   10.83
   2   3  -2 1777.60   11.84
  -2  -3   2 1819.98   11.16
  -2  -3   2 1789.95    7.01
   2   3  -2 1824.91   12.21
   2   3  -1 1573.21   11.32
   2   3  -1 1570.75   11.02
  -2  -3   1 1581.54   10.65
  -2  -3   0   75.85    2.37
   2   3   0   75.15    2.54
  -2  -3   0   79.88    2.05
  -2  -3  -1 1859.71   10.03
   2   3   1 1848.39    9.78
  -2  -3  -2 4243.15   17.45
   2   3   2 4215.04   15.44
   2   3   2 4359.36   18.76
  -2  -3  -2 4343.56   15.68
   2   3   3  425.42    5.31
   2   3   3  437.02    6.02
  -2  -3  -3  433.27    5.47
  -2  -3  -3  424.70    5.30
   2   3   4   58.17    2.19
   2   3   4   54.55    2.12
   2   3   4   61.31    2.34
  -2  -3  -4   56.17    1.95
   2   3   5   49.48    2.14
   2   3   5   54.57    2.33
  -2  -3  -5   53.20    1.90
   2   3   6  395.04    6.62
  -2  -3  -6  415.48    5.10
  -2  -3  -7   60.05    1.94
   2   3   7   55.46    2.74
   2   3   7   52.53    2.23
   2   3   8   86.30    3.68
  -2  -3  -8   94.50    2.39
   2   3   8   87.53    2.95
   2   3   9  256.03    6.61
   2   3  10    2.35    1.04
   2   3  11   17.17    2.07
   2   3  12    1.21    1.05
  -2  -4  10   11.05    2.16
  -2  -4   9   17.86    2.41
  -2  -4   8  246.64    7.97
  -2  -4   7  439.00   10.18
  -2  -4   7  417.75    4.48
  -2  -4   6  180.19    6.28
  -2  -4   6  168.17    3.17
   2   4  -5    1.16    0.64
  -2  -4   5    1.39    0.88
  -2  -4   5    1.37    0.49
  -2  -4   5    1.43    0.56
  -2  -4   4  508.36    5.99
  -2  -4   4  492.07    6.08
   2   4  -4  504.34    7.19
   2   4  -3   66.92    1.77
  -2  -4   3   70.43    2.38
  -2  -4   3   69.81    1.98
   2   4  -3   67.99    2.61
   2   4  -2  248.47    5.12
  -2  -4   2  254.91    3.27
   2   4  -2  251.99    5.17
  -2  -4   2  251.68    4.73
   2   4  -2  254.35    2.90
  -2  -4   2  248.81    4.50
   2   4  -1  330.85    2.97
  -2  -4   1  345.64    3.82
   2   4  -1  334.99    5.87
   2   4  -1  339.15    5.96
  -2  -4   1  345.46    5.34
   2   4   0   76.72    2.95
  -2  -4   0   72.73    2.50
   2   4   0   75.50    1.68
   2   4   0   67.48    2.59
  -2  -4   0   70.53    2.12
  -2  -4  -1  319.41    5.28
   2   4   1  324.78    4.50
  -2  -4  -1  325.72    4.75
   2   4   1  319.02    5.63
   2   4   2 1290.97    9.19
  -2  -4  -2 1265.93    9.37
  -2  -4  -3   20.98    1.34
   2   4   3   25.08    1.42
  -2  -4  -3   22.61    1.46
  -2  -4  -4  226.18    4.37
   2   4   5  209.68    4.56
  -2  -4  -5  222.32    4.24
   2   4   6  134.38    3.99
  -2  -4  -6  134.90    3.33
   2   4   7 1009.23   11.62
  -2  -4  -7 1079.55    9.26
  -2  -4  -8  151.74    3.51
   2   4   8  140.66    4.61
   2   4   9  107.09    4.28
   2   4  10    1.84    1.06
   2   4  11  240.57    7.18
   2   4  12  181.53    6.59
  -2  -5  10    1.29    1.69
  -2  -5   9   18.80    2.66
  -2  -5   8  178.79    7.17
  -2  -5   7   72.71    4.42
  -2  -5   7   63.27    1.98
  -2  -5   6   85.74    4.56
  -2  -5   6   79.50    2.44
   2   5  -5   67.09    2.33
  -2  -5   5   63.90    3.88
   2   5  -4  893.09    7.82
  -2  -5   4  900.00    9.86
  -2  -5   4  898.28    8.64
  -2  -5   4  874.85    8.66
  -2  -5   3   59.84    2.09
  -2  -5   3   60.28    2.58
   2   5  -3   57.78    1.79
  -2  -5   3   60.61    2.38
  -2  -5   2  157.37    3.27
   2   5  -2  153.80    2.69
  -2  -5   2  154.04    4.20
  -2  -5   2  156.74    3.87
  -2  -5   1   79.38    3.08
  -2  -5   1   71.35    2.24
   2   5  -1   68.61    1.81
  -2  -5   1   67.46    2.69
   2   5  -1   77.41    3.25
   2   5   0  414.32    7.50
  -2  -5   0  423.91    6.46
   2   5   0  406.76    4.89
   2   5   1   51.78    2.06
   2   5   1   54.68    2.93
  -2  -5  -1   51.28    2.26
   2   5   2 3181.60   18.73
  -2  -5  -2 3208.12   17.69
   2   5   3  943.09    8.85
  -2  -5  -3  930.71    9.52
   2   5   4    2.08    0.57
  -2  -5  -4    1.62    0.58
   2   5   5 1192.55   11.10
  -2  -5  -5 1159.33   10.61
   2   5   6   66.87    2.82
  -2  -5  -6   59.38    2.45
  -2  -5  -7  264.52    5.15
   2   5   7  255.04    5.80
  -2  -5  -8  292.57    5.50
   2   5   8  282.42    6.60
  -2  -5  -9   -0.54    0.57
   2   5   9    0.07    0.87
   2   5  10    3.12    1.09
   2   5  11    2.00    1.10
   2   5  12    4.13    1.52
  -2  -6   9   17.82    2.75
  -2  -6   8   66.09    4.52
  -2  -6   7   34.25    3.24
  -2  -6   6   20.75    1.34
  -2  -6   6   22.28    2.56
  -2  -6   5  110.97    5.23
   2   6  -5  113.82    3.19
  -2  -6   5  115.44    3.28
  -2  -6   4   21.91    1.78
  -2  -6   4   20.74    1.49
   2   6  -4   20.45    1.30
  -2  -6   3   66.72    3.09
  -2  -6   3   74.45    2.79
   2   6  -3   70.81    2.18
  -2  -6   3   62.79    2.56
  -2  -6   2  739.73    8.92
  -2  -6   2  762.60    8.74
   2   6  -2  753.41    6.87
  -2  -6   2  731.88   10.02
  -2  -6   1   12.95    1.24
  -2  -6   1   10.42    1.32
   2   6  -1   15.01    1.69
  -2  -6   1   14.94    1.34
   2   6  -1   14.32    1.04
   2   6   0  176.61    5.40
   2   6   0  178.68    3.71
  -2  -6   0  176.97    4.44
   2   6   1  269.81    6.78
   2   6   1  263.07    5.13
   2   6   2  513.56    8.16
   2   6   2  554.08   10.22
   2   6   3  375.07    7.60
   2   6   3  360.64    8.17
   2   6   3  360.42    5.61
  -2  -6  -3  362.05    6.38
   2   6   4  186.82    5.93
   2   6   4  200.02    4.46
  -2  -6  -4  183.53    4.64
   2   6   5  255.34    5.34
  -2  -6  -5  241.05    5.25
  -2  -6  -6 1122.58   11.53
   2   6   6 1135.33   11.90
  -2  -6  -7 1450.46   13.25
   2   6   7 1393.47   13.82
   2   6   8  243.77    6.11
  -2  -6  -8  251.88    5.54
   2   6   9   37.80    2.63
   2   6  10   42.99    2.91
   2   6  11   43.85    3.10
  -2  -7   8   -0.33    1.35
  -2  -7   7   44.15    3.79
   2   7  -6    4.30    0.88
  -2  -7   6    4.62    0.78
  -2  -7   5    1.48    0.57
   2   7  -5    0.59    0.51
  -2  -7   5   -0.31    1.17
  -2  -7   4  406.19    6.74
  -2  -7   4  408.37    8.01
   2   7  -4  403.33    6.10
  -2  -7   3 1838.56   17.17
   2   7  -3 1829.89   12.18
  -2  -7   3 1808.14   14.60
  -2  -7   2 1115.98   11.73
   2   7  -2 1135.05    9.57
  -2  -7   1 3790.21   22.96
  -2  -7   1 3749.09   24.49
  -2  -7   1 3826.51   21.83
   2   7  -1 3860.17   27.22
   2   7  -1 3808.50   18.26
   2   7   0   24.70    2.29
  -2  -7   0   25.29    2.22
   2   7   0   23.12    1.59
  -2  -7   0   26.28    1.88
   2   7   1  676.37    8.86
  -2  -7  -1  673.10    9.35
   2   7   2   46.10    2.60
   2   7   2   44.21    3.14
  -2  -7  -2   43.37    2.43
   2   7   3    9.94    1.62
  -2  -7  -3    6.90    1.16
   2   7   3    7.82    1.25
   2   7   4  149.99    5.53
  -2  -7  -4  142.07    4.40
   2   7   4  148.13    5.91
   2   7   4  145.43    3.88
   2   7   5  464.16   10.39
   2   7   5  483.28   10.50
  -2  -7  -5  474.34    7.98
   2   7   5  482.13    7.47
   2   7   6   -0.60    0.73
  -2  -7  -6    1.08    0.73
   2   7   6    0.57    1.23
   2   7   7  242.69    5.99
  -2  -7  -7  231.22    5.71
  -2  -7  -8    0.10    0.68
   2   7   8    0.41    0.93
   2   7   9   64.75    3.44
   2   7  10  140.29    5.28
   2   7  11  112.57    5.11
  -2  -8   7    0.35    1.26
  -2  -8   6  153.50    6.76
  -2  -8   5    0.09    0.52
  -2  -8   5   -0.87    1.14
   2   8  -4  401.19    6.51
  -2  -8   4  410.09    8.79
  -2  -8   4  402.56    7.34
   2   8  -3   10.65    1.12
  -2  -8   3    9.05    1.22
  -2  -8   2    1.77    0.64
   2   8  -2    0.21    0.48
  -2  -8   2    0.24    0.76
  -2  -8   1    1.10    0.62
   2   8  -1    0.56    0.46
  -2  -8   1    0.54    0.78
   2   8   0 1823.16   14.45
  -2  -8   0 1836.21   16.26
   2   8   1 1477.33   18.20
   2   8   1 1436.45   13.89
  -2  -8  -1 1430.59   14.46
   2   8   2  140.91    5.69
  -2  -8  -2  145.11    4.75
   2   8   2  137.73    4.75
   2   8   3 1112.01   16.14
  -2  -8  -3 1097.19   12.95
   2   8   4    3.79    1.35
  -2  -8  -4    3.70    1.06
   2   8   4    5.80    1.51
   2   8   5    4.95    0.93
  -2  -8  -5    6.25    1.23
   2   8   5    4.78    1.42
   2   8   5    8.32    1.67
  -2  -8  -6    0.77    0.77
   2   8   6    0.37    0.97
   2   8   6    1.09    0.68
   2   8   6   -1.42    1.20
   2   8   7   25.39    2.94
   2   8   7   19.70    1.84
  -2  -8  -7   20.62    1.94
   2   8   7   25.08    2.90
  -2  -8  -8    6.32    1.22
   2   8   8    3.06    1.52
   2   8   8    5.56    2.19
   2   8   8    7.79    1.36
   2   8   9    1.30    0.91
   2   8   9    1.42    1.54
   2   8  10   11.20    1.74
   2   8  10   14.85    3.08
  -2  -9   6   54.55    4.25
  -2  -9   5   30.60    3.18
  -2  -9   5   26.22    2.09
  -2  -9   4  134.67    6.21
  -2  -9   4  125.12    5.18
  -2  -9   4  128.76    4.45
  -2  -9   3    0.76    0.71
  -2  -9   3    0.19    0.89
   2   9  -2   29.63    1.94
  -2  -9   2   31.41    2.65
  -2  -9   2   32.73    2.38
   2   9  -1    8.16    1.12
  -2  -9   1    9.08    1.54
  -2  -9   1    6.32    1.20
  -2  -9   0   27.79    2.24
  -2  -9   0   25.02    2.43
   2   9   0   26.39    1.94
   2   9   1  325.30    7.05
   2   9   1  329.36    9.35
  -2  -9  -1  317.45    7.43
  -2  -9  -2    6.30    1.18
   2   9   2    9.37    1.88
   2   9   2    9.19    1.49
  -2  -9  -2    7.08    1.60
   2   9   3   69.63    4.32
   2   9   3   66.36    3.77
   2   9   4  117.11    5.69
  -2  -9  -4  109.73    4.36
   2   9   5   23.48    2.70
   2   9   5   20.40    2.60
  -2  -9  -5   18.71    1.98
   2   9   6    8.93    1.95
   2   9   6    8.40    1.86
   2   9   6    7.57    1.20
  -2  -9  -6    7.77    1.39
   2   9   7   18.38    2.71
   2   9   7   19.39    2.79
   2   9   7   11.40    1.52
  -2  -9  -7   11.73    1.60
   2   9   8   14.76    2.65
   2   9   8   13.03    1.67
   2   9   8   19.60    3.17
   2   9   9  120.05    7.38
   2   9   9  114.00    6.78
  -2 -10   4   13.30    2.33
  -2 -10   4   10.04    1.50
  -2 -10   3  343.86    9.11
  -2 -10   3  323.30    7.68
  -2 -10   2  140.02    5.15
  -2 -10   1    4.44    1.07
  -2 -10   1    6.86    1.45
  -2 -10   0    0.79    0.94
  -2 -10   0    1.16    1.10
  -2 -10  -1   20.69    2.44
   2  10   1   18.92    1.91
  -2 -10  -1   17.57    2.08
   2  10   2  122.07    6.22
  -2 -10  -2  114.05    5.43
   2  10   2  115.38    4.86
  -2 -10  -2  115.32    4.93
   2  10   3  137.20    6.61
   2  10   3  133.71    5.53
  -2 -10  -3  128.82    5.97
  -2 -10  -3  117.34    4.96
   2  10   4   21.67    2.57
   2  10   4   21.25    2.82
  -2 -10  -4   16.63    1.98
   2  10   5   15.26    2.55
  -2 -10  -5   14.71    1.99
   2  10   5   15.92    2.44
  -2 -10  -6  267.85    7.59
   2  10   6  273.53    9.35
   2  10   6  255.24    9.41
   2  10   7  241.07    9.34
   2  10   7  271.28   10.13
  -2 -11   1   63.76    4.25
  -2 -11   1   69.26    3.98
  -2 -11   0    1.56    1.14
  -2 -11   0    1.37    1.24
  -2 -11  -1    5.28    1.36
  -2 -11  -1    6.38    1.77
  -2 -11  -2   12.11    2.19
  -2 -11  -2   18.98    2.30
  -2 -11  -3    3.70    1.24
   2  11   3    4.62    1.75
  -2 -11  -3    2.80    1.37
  -2 -11  -4   19.61    2.29
   2  11   4   23.83    3.34
  -2 -11  -4   26.63    3.04
   2  11   4   25.89    2.86
  -3   9   1   82.01    5.08
  -3   9   0   76.33    4.78
  -3   9  -1   13.91    2.23
  -3   8   5    3.79    1.78
  -3   8   4    7.72    1.94
   3  -8  -4    6.48    1.43
  -3   8   3    0.11    1.34
   3  -8  -3    0.64    0.94
  -3   8   2  236.89    8.23
  -3   8   1  119.28    5.77
  -3   8   0   25.14    2.74
  -3   8  -1    3.12    1.20
  -3   8  -2    5.58    1.44
  -3   8  -3    4.38    1.26
  -3   8  -4    5.46    1.53
  -3   8  -5    1.06    1.14
  -3   7   7   24.03    3.38
  -3   7   6  320.85   10.81
  -3   7   5   70.36    5.00
   3  -7  -5   60.29    3.30
   3  -7  -4   45.77    2.82
  -3   7   4   44.02    3.79
  -3   7   3   50.85    3.79
   3  -7  -3   52.84    3.10
  -3   7   2   27.94    2.82
   3  -7  -2   32.18    2.51
  -3   7   1   43.62    3.34
  -3   7   0    3.89    1.31
  -3   7  -1  318.33    8.54
  -3   7  -2    2.92    1.06
  -3   7  -3   41.72    3.17
  -3   7  -4   66.70    3.87
  -3   7  -5   12.84    1.88
  -3   7  -6    0.87    0.92
  -3   7  -7  132.42    5.64
  -3   6   8   23.74    3.57
  -3   6   7   18.49    3.04
  -3   6   5  159.17    7.02
  -3   6   4   49.59    3.79
   3  -6  -4   54.61    2.92
  -3   6   3  280.48    8.59
   3  -6  -3  285.55    6.48
  -3   6   2  483.07   10.72
   3  -6  -2  472.79    8.44
  -3   6   1  407.14    9.48
  -3   6   0   53.59    3.45
  -3   6  -1  294.20    7.75
  -3   6  -2  113.86    4.79
  -3   6  -3  141.46    5.27
  -3   6  -4   39.48    2.86
   3  -6   4   35.90    1.88
  -3   6  -5    0.08    0.79
   3  -6   5   -0.18    0.61
   3  -6   6   72.69    3.26
  -3   6  -6   79.59    4.11
   3  -6   7   24.74    2.17
  -3   6  -7   25.95    2.51
   3  -6   8    6.46    1.48
  -3   6  -8    7.64    1.60
  -3   5   9    8.24    2.42
  -3   5   8    9.44    2.29
  -3   5   7   12.58    2.49
  -3   5   6   39.76    3.79
   3  -5  -6   32.00    1.95
  -3   5   5  105.63    5.67
   3  -5  -5  103.36    3.50
  -3   5   3  421.72    9.98
   3  -5  -3  439.69    7.27
  -3   5   2  842.69   13.44
   3  -5  -2  857.11   10.09
  -3   5   1   20.31    2.11
  -3   5   0   20.45    2.00
  -3   5  -1   12.94    1.55
   3  -5   2  128.41    2.10
  -3   5  -2  129.59    4.82
   3  -5   3  557.28    6.15
  -3   5  -3  536.12    9.67
  -3   5  -4   37.42    2.66
   3  -5   4   33.42    1.79
  -3   5  -5  144.87    5.19
   3  -5   5  139.38    4.07
   3  -5   6   42.27    2.49
  -3   5  -6   49.80    3.14
   3  -5   7   37.38    2.55
  -3   5  -7   39.79    2.85
   3  -5   8    1.48    0.89
  -3   5  -8    5.20    1.31
  -3   5  -9    2.09    1.08
   3  -5   9    0.62    0.99
   3  -5  10   76.44    4.51
  -3   5 -10   71.56    4.30
  -3   4  10    0.46    1.74
  -3   4   9   52.73    4.86
  -3   4   8   44.82    4.33
  -3   4   8   39.64    2.44
  -3   4   7  308.46   10.31
  -3   4   7  263.35    5.55
  -3   4   6  102.41    5.73
  -3   4   6   98.91    3.03
   3  -4  -6   95.17    2.86
  -3   4   5   10.96    0.97
  -3   4   5   14.43    2.19
   3  -4  -5   14.33    1.20
  -3   4   4  688.87   12.78
  -3   4   4  691.98    5.64
  -3   4   3   70.26    3.90
   3  -4  -3   64.09    2.49
   3  -4  -2  277.32    5.21
  -3   4   1  176.05    5.57
  -3   4   0  261.14    6.47
  -3   4  -1   15.65    1.69
   3  -4   2  217.95    2.85
  -3   4  -2  222.35    5.82
   3  -4   3    0.62    0.42
  -3   4  -3    0.24    0.62
  -3   4  -4   93.25    3.81
   3  -4   4   87.21    2.83
  -3   4  -5  182.85    5.45
   3  -4   5  171.10    4.34
   3  -4   6    9.37    1.29
  -3   4  -6   13.61    1.65
  -3   4  -7    9.01    1.41
   3  -4   7    5.65    1.13
   3  -4   8   95.43    4.20
  -3   4  -8  108.60    4.77
  -3   4  -9   27.05    2.56
   3  -4   9   25.78    2.46
  -3   4 -10   40.95    3.20
   3  -4  10   35.39    3.01
  -3   3  10   10.50    1.77
  -3   3  10    8.63    2.30
  -3   3   9  172.13    8.33
  -3   3   9  151.44    5.35
  -3   3   8    3.27    1.84
  -3   3   8    0.59    0.71
  -3   3   7   51.30    4.17
  -3   3   7   49.40    2.65
   3  -3  -6    1.02    0.46
  -3   3   6    1.56    1.27
  -3   3   6    1.12    0.61
  -3   3   5  151.64    3.68
   3  -3  -5  155.63    3.10
  -3   3   4    5.19    1.30
  -3   3   4    1.20    0.40
   3  -3  -3   -0.11    0.38
  -3   3   3    0.15    0.24
   3  -3  -2  554.76    8.25
  -3   3   2  601.14   10.10
  -3   3   1  528.15    8.95
  -3   3  -1    4.43    0.95
   3  -3   2  212.86    2.87
  -3   3  -2  222.73    5.46
   3  -3   3   31.51    1.43
  -3   3  -3   30.49    2.11
  -3   3  -4  719.41    9.85
   3  -3   4  751.55    8.13
   3  -3   5  287.15    5.60
  -3   3  -5  277.98    6.35
  -3   3  -6 1111.82   13.03
   3  -3   6 1108.02   11.98
   3  -3   7   49.93    2.80
  -3   3  -7   49.82    2.90
   3  -3   8  398.95    8.39
  -3   3  -8  421.69    8.85
  -3   3  -9    1.32    1.04
   3  -3   9    0.76    0.86
  -3   3 -10   51.06    3.43
   3  -3  10   46.20    3.42
  -3   3 -11    4.94    1.41
   3  -3  11    6.47    1.67
  -3   2  11   39.81    4.47
  -3   2  11   34.15    3.08
  -3   2  10  217.35    9.75
  -3   2  10  179.75    6.25
  -3   2   9    2.98    1.66
  -3   2   8   66.91    4.87
  -3   2   8   64.70    3.44
  -3   2   7  600.16   13.21
  -3   2   7  574.27    9.17
  -3   2   6  170.20    6.62
  -3   2   6  160.10    4.56
  -3   2   5    0.77    0.62
  -3   2   5   -0.88    1.10
  -3   2   4   41.10    2.89
  -3   2   4   39.43    1.85
   3  -2  -4   43.12    1.27
  -3   2   3  161.59    3.28
  -3   2   3  145.02    5.07
  -3   2   2    4.00    0.51
  -3   2   2    5.35    1.06
   3  -2  -2    3.92    0.69
  -3   2   1   96.21    1.46
   3  -2  -1   95.37    2.83
  -3   2   1  100.73    3.71
  -3   2   1   99.46    2.65
  -3   2   1  100.97    1.21
  -3   2   0   38.16    2.16
  -3   2   0   37.41    1.69
  -3   2  -1  105.70    1.74
   3  -2   1  107.02    1.49
  -3   2  -2  418.73    4.74
   3  -2   2  431.28    4.19
  -3   2  -3   96.70    3.33
  -3   2  -3   92.81    2.72
   3  -2   3  102.55    2.56
  -3   2  -4  443.17    7.30
   3  -2   4  454.78    6.26
   3  -2   5  380.19    6.41
  -3   2  -5  368.91    6.92
   3  -2   6  154.17    4.51
  -3   2  -6  150.75    4.56
  -3   2  -6  147.60    3.05
  -3   2  -7  111.40    4.16
   3  -2   7  110.50    4.12
  -3   2  -7  107.23    2.47
   3  -2   8 1557.72   16.29
  -3   2  -8 1611.12    9.85
  -3   2  -9   36.48    2.73
   3  -2   9   37.97    2.79
   3  -2  10  121.49    5.27
  -3   2 -10  131.39    5.27
   3  -2  11   22.38    2.53
  -3   2 -11   26.20    2.58
   3  -2  12  161.22    6.87
  -3   1  10   10.95    1.83
  -3   1   9   -0.53    0.98
  -3   1   8    1.24    0.96
  -3   1   7  182.25    5.55
  -3   1   6  429.08    8.06
  -3   1   6  438.99   10.50
  -3   1   5  140.99    5.40
  -3   1   5  142.89    4.35
  -3   1   4  356.61    8.26
  -3   1   4  358.96    6.21
  -3   1   3  833.51    9.04
  -3   1   3  843.72   11.42
  -3   1   2 1193.21    9.31
   3  -1  -2 1172.89    7.27
   3  -1  -1 2230.43   17.32
  -3   1   1 2198.01   15.56
  -3   1   1 2199.76    9.67
   3  -1   0    4.00    0.94
  -3   1   0    2.06    0.64
  -3   1   0    3.23    0.49
  -3   1   0    2.90    0.30
   3  -1   1   96.74    3.21
   3  -1   1   97.81    1.69
  -3   1  -1  103.43    3.06
  -3   1  -1  102.72    1.83
  -3   1  -2 3007.11   16.56
  -3   1  -2 2984.49   11.77
   3  -1   2 2966.11   11.14
   3  -1   2 2967.49   17.49
   3  -1   3  919.61    7.52
  -3   1  -3  918.29    9.26
   3  -1   4  412.81    5.80
  -3   1  -4  415.34    6.40
   3  -1   5  185.54    4.37
  -3   1  -5  187.00    4.64
  -3   1  -6    2.12    0.66
   3  -1   6    3.33    0.83
   3  -1   7  607.84    9.51
  -3   1  -7  617.10    6.27
  -3   1  -7  614.73    9.36
   3  -1   8   81.04    3.81
  -3   1  -8   82.72    3.64
  -3   1  -8   86.29    1.77
  -3   1  -8   76.51    1.48
   3  -1   9 1481.98   16.89
  -3   1  -9 1551.06   16.72
   3  -1  10  169.72    6.10
  -3   1 -10  179.86    5.97
   3  -1  11   29.20    2.73
   3  -1  12   16.31    2.23
  -3   0  11   21.64    2.54
  -3   0  10    8.78    1.78
  -3   0   9   89.72    4.57
  -3   0   8   33.52    2.78
  -3   0   7  339.12    7.90
  -3   0   6   77.91    3.70
  -3   0   5 1095.10   12.93
  -3   0   4   32.30    2.28
  -3   0   3   -0.17    0.49
  -3   0   2  290.79    5.63
   3   0  -1   29.48    1.86
  -3   0   1   28.34    1.56
   3   0   0  929.38    9.09
  -3   0   0  928.26    5.77
  -3   0  -1 2085.31    8.99
   3   0   1 2080.77    9.16
  -3   0  -1 2076.61   11.94
  -3   0  -2 2004.83   11.91
  -3   0  -2 2042.85    9.95
   3   0   2 2017.42    9.64
   3   0   2 2030.46   12.80
   3   0   3 2548.99   12.75
  -3   0  -3 2504.09   14.33
  -3   0  -3 2538.59   13.07
   3   0   3 2533.76   14.98
  -3   0  -4  832.06    8.49
   3   0   4  849.87    8.26
  -3   0  -4  860.68    8.74
   3   0   5 1141.69   10.67
  -3   0  -5 1147.43   10.88
  -3   0  -6    0.53    0.35
   3   0   6    0.80    0.62
  -3   0  -7    0.04    0.33
  -3   0  -7   -0.04    0.52
  -3   0  -8  767.60    4.81
  -3   0  -8  755.26   10.79
   3   0   9   54.87    3.20
  -3   0  -9   60.91    3.30
   3   0  10   46.05    3.15
   3   0  11  351.39    8.88
   3   0  12    1.44    1.32
  -3  -1  11   -0.13    1.18
  -3  -1  10    2.64    1.34
  -3  -1   9    0.74    1.05
  -3  -1   8   86.04    4.53
  -3  -1   8   97.30    3.11
  -3  -1   7 2383.81   22.10
  -3  -1   7 2450.71   16.06
  -3  -1   6   79.63    2.92
  -3  -1   6   77.59    3.89
  -3  -1   5  275.73    6.82
  -3  -1   4    3.94    1.01
  -3  -1   3  267.47    5.40
  -3  -1   2  330.02    5.23
   3   1  -1    7.28    0.84
  -3  -1   1    6.49    0.70
   3   1   0 1804.32   10.59
  -3  -1   0 1836.51    8.92
  -3  -1  -1 2111.78    9.94
   3   1   1 2096.12    9.79
   3   1   1 2119.46   11.04
   3   1   2  147.86    2.80
  -3  -1  -2  140.73    2.83
  -3  -1  -2  140.71    2.79
  -3  -1  -2  140.29    3.42
   3   1   2  149.54    3.07
   3   1   3 9231.53   25.90
   3   1   3 9213.96   24.31
  -3  -1  -3 8937.96   24.24
  -3  -1  -3 8827.31   26.61
  -3  -1  -3 8578.87   23.61
   3   1   4  978.53    8.95
  -3  -1  -4  968.90    8.59
  -3  -1  -4  947.76    9.10
   3   1   5 1421.43   11.87
  -3  -1  -5 1385.01    9.80
  -3  -1  -6 3418.56   20.08
   3   1   6 3368.06   19.88
  -3  -1  -7  342.23    6.78
  -3  -1  -7  330.86    4.13
   3   1   8  241.14    6.20
  -3  -1  -8  255.11    3.13
   3   1   9  110.91    4.50
  -3  -1  -9   98.00    1.31
   3   1  10    6.36    1.43
   3   1  11    0.68    0.89
   3   1  12   24.42    2.58
  -3  -2  11   65.06    4.58
  -3  -2  10    1.84    1.40
  -3  -2   9   55.18    3.90
  -3  -2   8  147.24    6.03
  -3  -2   7  517.93   10.76
  -3  -2   7  526.46    6.69
  -3  -2   6   28.71    2.50
  -3  -2   6   23.39    1.43
  -3  -2   6   26.39    1.55
  -3  -2   5  582.74   10.66
  -3  -2   5  579.16    7.36
  -3  -2   4  235.52    4.68
  -3  -2   3   47.60    2.12
  -3  -2   3   46.15    1.26
  -3  -2   2  100.70    2.50
   3   2  -2   99.05    2.09
  -3  -2   1 1874.32    7.93
  -3  -2   1 1977.85   13.21
  -3  -2   0 1833.78   12.74
  -3  -2   0 1846.95    9.95
  -3  -2   0 1808.78    6.86
  -3  -2  -1   44.56    1.23
  -3  -2  -1   43.93    2.01
  -3  -2  -1   46.66    1.68
   3   2   1   45.98    1.64
   3   2   1   48.08    1.35
   3   2   2  601.49    5.54
  -3  -2  -2  621.27    6.07
  -3  -2  -2  588.11    7.02
   3   2   2  632.34    7.68
   3   2   2  630.49    6.11
  -3  -2  -2  606.35    5.33
   3   2   3    1.18    0.51
  -3  -2  -3    1.77    0.56
   3   2   3    3.06    0.68
   3   2   3    2.13    0.48
  -3  -2  -3    2.21    0.45
  -3  -2  -3    2.75    0.57
   3   2   4    0.16    0.44
  -3  -2  -4   -0.21    0.37
   3   2   4    0.24    0.39
  -3  -2  -4    0.84    0.41
   3   2   4    0.15    0.56
   3   2   5  592.20    7.76
   3   2   5  597.94    7.48
  -3  -2  -5  609.39    7.62
  -3  -2  -5  589.51    6.59
  -3  -2  -6    2.74    0.55
  -3  -2  -7 2589.42   12.83
   3   2   8   13.50    1.59
  -3  -2  -8   15.51    0.97
   3   2   9  161.76    5.36
  -3  -2  -9  163.95    2.66
   3   2  10    7.07    1.42
   3   2  11   26.25    2.52
   3   2  12    0.59    1.22
   3   2  13   17.46    2.37
  -3  -3  10   66.44    4.84
  -3  -3   9  104.14    5.48
  -3  -3   8    4.47    1.48
  -3  -3   7  107.81    5.27
  -3  -3   7  109.94    2.88
  -3  -3   6   21.76    2.51
  -3  -3   6   18.35    1.59
  -3  -3   6   23.32    1.45
  -3  -3   5   50.30    3.37
  -3  -3   5   54.85    2.43
  -3  -3   5   52.03    2.26
  -3  -3   5   50.31    2.03
  -3  -3   4   13.60    1.20
  -3  -3   4   14.84    0.96
  -3  -3   3 1445.25    9.23
  -3  -3   3 1435.33   11.54
  -3  -3   3 1466.39    7.74
  -3  -3   2   22.27    0.94
   3   3  -2   22.46    1.35
   3   3  -2   21.88    1.66
  -3  -3   2   24.78    0.75
  -3  -3   2   25.23    1.60
   3   3  -1 9999.00   32.95
  -3  -3   1 9867.16   30.60
  -3  -3   0 2047.53   13.75
   3   3   0 2039.34   14.80
  -3  -3   0 2014.17   11.39
   3   3   1  958.88    5.01
   3   3   1  945.67   10.00
   3   3   2   19.28    1.21
  -3  -3  -2   20.49    1.27
   3   3   2   18.94    1.46
  -3  -3  -2   17.08    1.31
   3   3   2   19.41    0.97
   3   3   3  191.74    4.53
   3   3   3  208.44    4.05
  -3  -3  -3  191.63    4.18
   3   3   3  209.39    3.70
   3   3   4 1044.83    9.62
   3   3   4 1042.25   10.40
   3   3   4 1070.55    9.51
   3   3   5   14.24    1.22
   3   3   5   14.51    1.30
  -3  -3  -5   13.38    1.10
   3   3   6  693.16    8.77
   3   3   6  713.27    9.29
  -3  -3  -6  712.11    7.58
   3   3   7    5.21    0.91
  -3  -3  -7    6.04    1.01
   3   3   8   36.19    2.43
   3   3   8   36.89    2.05
  -3  -3  -8   39.69    1.66
   3   3   9   84.16    3.83
  -3  -3  -9   88.42    2.40
   3   3  10  231.69    6.78
   3   3  11    2.79    1.07
   3   3  12   19.83    2.38
   3   3  13   18.19    2.53
  -3  -4  10    1.38    1.24
  -3  -4   9   10.31    2.00
  -3  -4   8    8.21    1.93
  -3  -4   7    9.25    1.76
  -3  -4   7    6.68    0.79
  -3  -4   6   58.25    2.27
  -3  -4   5  218.93    4.10
  -3  -4   4   22.98    1.17
  -3  -4   3    0.63    0.42
  -3  -4   3    0.42    0.26
  -3  -4   2 2238.76   14.25
   3   4  -2 2276.25   15.26
   3   4  -1   12.53    1.25
   3   4   1  655.67    4.31
   3   4   2  322.99    4.04
  -3  -4  -2  319.67    5.60
   3   4   3 1376.09    9.73
   3   4   3 1405.70   11.00
  -3  -4  -3 1379.13   11.55
   3   4   4  753.94    8.23
  -3  -4  -4  772.97    8.63
   3   4   4  765.48    8.42
   3   4   5  180.95    4.38
  -3  -4  -5  181.31    4.18
   3   4   6   66.40    2.88
  -3  -4  -6   66.62    2.46
  -3  -4  -7    4.44    0.68
   3   4   7    1.79    0.86
   3   4   8   34.39    2.46
  -3  -4  -8   38.48    1.84
  -3  -4  -9    0.90    0.49
   3   4   9    0.04    0.83
  -3  -4 -10    1.39    0.54
   3   4  10    1.24    1.05
   3   4  11   13.28    1.90
   3   4  12    3.57    1.30
  -3  -5  10   18.52    2.84
  -3  -5   9    0.34    1.26
  -3  -5   8  150.07    6.96
  -3  -5   7  442.72   11.16
  -3  -5   6  273.36    8.65
  -3  -5   6  267.83    4.92
  -3  -5   5  313.00    5.39
  -3  -5   4   26.81    1.75
  -3  -5   4   25.93    1.32
  -3  -5   4   29.47    1.75
  -3  -5   3   49.22    1.49
  -3  -5   3   53.40    2.42
  -3  -5   3   54.86    2.44
  -3  -5   2  171.04    2.25
   3   5  -2  171.89    4.79
  -3  -5   2  173.73    4.52
  -3  -5   2  166.83    4.27
   3   5  -1   34.20    2.21
  -3  -5   1   33.19    1.98
  -3  -5   0  324.90    6.11
   3   5   0  324.97    2.80
   3   5   1  165.46    3.14
  -3  -5  -1  167.19    4.40
  -3  -5  -2 2640.09   17.44
   3   5   2 2541.71   14.95
   3   5   3  619.87    7.49
  -3  -5  -3  629.95    8.24
   3   5   4 1377.34   11.69
  -3  -5  -4 1373.09   12.09
   3   5   5    5.53    0.96
  -3  -5  -5    3.86    0.80
   3   5   6   25.21    1.85
  -3  -5  -6   28.23    1.76
   3   5   7  138.80    4.47
  -3  -5  -7  145.49    3.85
   3   5   8 1818.66   16.92
  -3  -5  -8 1884.28   14.07
   3   5   9   90.22    4.03
  -3  -5  -9   92.68    3.16
   3   5  10   75.51    4.01
  -3  -5 -10   73.25    2.75
   3   5  11  409.65    9.71
   3   5  12   25.76    2.65
  -3  -6   9  139.11    7.06
  -3  -6   8    1.33    1.43
  -3  -6   7   77.48    5.04
  -3  -6   6  398.04   11.01
  -3  -6   6  382.89    6.04
  -3  -6   5  226.05    4.87
  -3  -6   4  518.78    8.43
  -3  -6   4  486.90    7.45
  -3  -6   3 1034.98    7.96
  -3  -6   3 1038.30   11.65
  -3  -6   3 1024.41   10.84
  -3  -6   2 1679.42   15.09
  -3  -6   2 1679.44    9.50
   3   6  -2 1635.97    7.23
   3   6  -2 1690.79   16.67
  -3  -6   2 1636.38   13.76
   3   6  -1   22.61    0.88
  -3  -6   1   21.00    1.62
   3   6   0  115.31    4.43
   3   6   0  113.38    2.30
  -3  -6   0  116.74    3.77
   3   6   1    5.82    0.73
   3   6   1    6.51    1.36
  -3  -6  -1    4.92    0.90
   3   6   2   45.08    2.26
  -3  -6  -2   41.61    2.31
   3   6   3  104.01    3.77
   3   6   3  103.67    3.26
  -3  -6  -3  109.85    3.75
   3   6   4   32.83    1.96
  -3  -6  -4   29.22    1.98
   3   6   5    1.76    0.68
  -3  -6  -5    0.81    0.60
   3   6   6   17.36    1.59
  -3  -6  -6   16.76    1.48
   3   6   7   -1.18    0.69
  -3  -6  -7    1.32    0.64
   3   6   8  978.15   12.65
  -3  -6  -8  970.06   10.79
  -3  -6  -9   -0.25    0.54
   3   6   9    2.25    1.06
   3   6  10   30.90    2.64
  -3  -6 -10   27.49    1.89
   3   6  11    2.86    1.18
   3   6  12  512.18   11.27
  -3  -7   8   -0.26    1.37
  -3  -7   7  179.82    7.76
  -3  -7   6   28.81    3.25
  -3  -7   6   25.16    1.69
  -3  -7   5    6.19    0.95
  -3  -7   4  482.56    8.64
  -3  -7   4  470.19    7.52
   3   7  -3  261.70    3.66
  -3  -7   3  257.49    6.37
  -3  -7   3  262.69    5.74
   3   7  -2 3975.97   13.65
  -3  -7   2 4021.49   22.63
   3   7  -1   30.31    2.52
   3   7  -1   35.79    1.40
  -3  -7   1   36.51    2.61
  -3  -7   1   37.42    2.26
   3   7   0   15.17    1.82
   3   7   0   16.05    1.06
  -3  -7   0   18.40    1.65
   3   7   1  195.98    4.18
   3   7   1  187.75    6.15
  -3  -7  -1  188.74    5.17
   3   7   2  261.43    5.52
   3   7   2  265.99    7.74
  -3  -7  -2  256.83    6.00
   3   7   3  233.64    6.04
   3   7   3  219.65    7.02
  -3  -7  -3  226.80    5.62
   3   7   4  107.66    4.45
   3   7   4   99.72    3.45
  -3  -7  -4   98.57    3.69
   3   7   5   44.36    3.16
   3   7   5   43.91    2.46
  -3  -7  -5   43.06    2.48
   3   7   6   37.95    2.48
  -3  -7  -6   40.21    2.45
   3   7   7  159.42    4.99
  -3  -7  -7  161.86    4.73
   3   7   8   90.54    4.00
  -3  -7  -8   93.10    3.65
   3   7   9    0.11    0.85
  -3  -7  -9    0.20    0.65
   3   7  10   28.31    2.49
  -3  -7 -10   28.75    2.15
   3   7  11   36.04    2.96
  -3  -8   7    9.57    2.31
  -3  -8   6  165.90    7.37
  -3  -8   5    0.11    0.54
  -3  -8   5   -0.05    1.25
  -3  -8   4   41.32    2.84
  -3  -8   4   36.58    2.29
  -3  -8   3    7.62    1.42
  -3  -8   3   10.59    1.35
   3   8  -2   42.04    1.69
  -3  -8   2   46.59    2.99
  -3  -8   2   43.22    2.53
  -3  -8   1    5.14    0.99
   3   8  -1    5.44    0.73
   3   8  -1    6.57    1.46
  -3  -8   1    6.20    1.29
  -3  -8   0    3.77    1.12
  -3  -8   0    3.01    0.83
   3   8   0    2.93    0.63
   3   8   0    4.16    1.25
   3   8   1   47.41    3.32
   3   8   1   49.59    2.33
  -3  -8  -1   45.98    2.75
   3   8   2  248.24    5.85
  -3  -8  -2  237.05    6.07
   3   8   3  247.77    6.48
   3   8   3  254.33    8.21
  -3  -8  -3  228.46    6.10
   3   8   4   45.60    3.55
   3   8   4   44.79    3.12
  -3  -8  -4   47.51    2.79
   3   8   5  185.87    6.63
   3   8   5  170.74    6.79
   3   8   5  172.60    4.84
  -3  -8  -5  175.34    5.33
   3   8   6  264.29    8.38
   3   8   6  270.43    6.34
  -3  -8  -6  271.49    6.51
   3   8   7   58.13    4.33
  -3  -8  -7   55.90    3.05
   3   8   7   51.46    2.99
   3   8   8   58.62    3.33
  -3  -8  -8   63.95    3.27
   3   8   9   28.99    2.51
  -3  -8  -9   27.16    2.23
  -3  -8 -10   17.77    1.90
   3   8  10   19.56    2.28
  -3  -9   6   66.19    5.01
  -3  -9   5   34.65    3.56
  -3  -9   5   29.96    2.17
  -3  -9   4  109.19    4.92
  -3  -9   4  109.57    4.08
  -3  -9   3    2.67    0.95
  -3  -9   3    3.29    1.14
  -3  -9   2  102.78    4.72
  -3  -9   2  107.53    4.24
  -3  -9   1    5.53    1.11
  -3  -9   1    4.09    1.19
   3   9   0   42.67    3.44
  -3  -9   0   42.25    3.15
   3   9   0   36.84    2.01
  -3  -9   0   35.95    2.52
   3   9   1  113.18    5.52
  -3  -9  -1  113.99    5.13
   3   9   1  114.63    3.72
  -3  -9  -1  125.02    4.68
   3   9   2  153.44    4.82
  -3  -9  -2  156.23    5.30
   3   9   3    7.48    1.35
   3   9   3    4.86    1.46
   3   9   4  215.36    6.82
   3   9   4  201.17    7.72
  -3  -9  -4  210.21    6.10
   3   9   5   20.77    2.52
   3   9   5   21.27    2.73
  -3  -9  -5   17.31    1.93
   3   9   6   19.60    2.81
   3   9   6   23.40    2.04
  -3  -9  -6   23.87    2.20
   3   9   7  151.22    7.19
   3   9   7  136.37    7.00
   3   9   7  141.51    4.88
  -3  -9  -7  143.84    5.13
   3   9   8  207.58    8.77
   3   9   8  170.44    7.87
   3   9   8  200.40    6.19
  -3  -9  -8  179.27    5.77
   3   9   9   79.18    5.91
   3   9   9   58.83    4.94
   3   9   9   62.19    3.70
  -3  -9  -9   72.51    3.85
  -3 -10   4   16.61    2.15
  -3 -10   4   15.83    1.82
  -3 -10   3    7.25    1.70
  -3 -10   3    6.70    1.35
  -3 -10   2   51.29    3.58
  -3 -10   2   50.33    3.12
  -3 -10   1   23.70    2.59
  -3 -10   1   16.80    1.91
  -3 -10   0   17.40    2.16
  -3 -10   0   20.95    2.16
  -3 -10  -1    5.71    1.37
   3  10   1    6.96    1.88
  -3 -10  -1    5.58    1.60
   3  10   2   19.10    2.57
  -3 -10  -2   17.28    1.97
   3  10   3  116.57    5.96
   3  10   3  112.09    4.71
  -3 -10  -3  108.59    4.72
   3  10   4   -0.34    1.05
  -3 -10  -4    0.73    0.80
   3  10   4    1.18    1.08
   3  10   5    2.18    1.33
   3  10   5    3.03    1.31
  -3 -10  -5    2.23    0.92
   3  10   6    4.51    1.70
  -3 -10  -6    4.70    1.42
   3  10   6    5.23    1.86
  -3 -10  -7    1.35    0.96
   3  10   7    1.01    1.50
   3  10   7    0.10    1.44
  -3 -11   1  150.08    6.44
  -3 -11   1  132.23    5.39
  -3 -11   0    3.13    1.13
  -3 -11   0    2.83    1.16
  -3 -11  -1    0.97    0.93
  -3 -11  -1    1.22    1.26
  -3 -11  -2    1.24    1.01
   3  11   2   -0.59    1.51
  -3 -11  -2    0.97    1.19
   3  11   3  372.84   11.55
  -3 -11  -3  369.19   10.64
  -3 -11  -3  373.88    9.29
   3  11   4    9.73    2.20
  -3 -11  -4    9.72    1.78
   3  11   5    0.20    1.50
  -3 -11  -5    1.82    1.02
  -4   8   2  104.33    5.78
  -4   8   1   28.37    3.03
  -4   8   0   29.22    3.12
  -4   8  -1   74.17    4.76
  -4   8  -2    5.53    1.49
  -4   8  -3   16.60    2.35
  -4   7   5    2.31    1.49
  -4   7   4   31.43    3.46
  -4   7   3    0.58    1.22
  -4   7   2   15.01    2.31
  -4   7   1   21.47    2.63
  -4   7   0  110.42    5.35
  -4   7  -1  102.40    5.16
  -4   7  -2   36.27    3.22
  -4   7  -3   53.81    3.73
  -4   7  -4   35.66    3.07
  -4   7  -5   59.02    4.00
  -4   7  -6    5.09    1.44
  -4   6   7   25.26    3.40
  -4   6   6   22.11    3.06
  -4   6   5   19.68    2.88
  -4   6   3   36.50    3.31
  -4   6   2   63.43    4.13
  -4   6   1  233.33    7.55
  -4   6   0  268.08    7.97
  -4   6  -1    2.17    1.04
  -4   6  -2    5.92    1.39
  -4   6  -3   24.77    2.46
  -4   6  -4  140.46    5.67
  -4   6  -5   -0.20    0.95
  -4   6  -6   20.66    2.41
  -4   6  -7    3.10    1.32
  -4   6  -8  107.86    5.27
  -4   5   8    5.32    2.20
  -4   5   7  167.34    8.01
  -4   5   6  138.20    6.97
  -4   5   5    4.80    1.54
  -4   5   4   51.88    3.91
  -4   5   3    6.63    1.67
  -4   5   1  703.78   12.47
  -4   5   0   14.35    1.84
  -4   5  -1  208.14    6.52
  -4   5  -2    0.00    0.72
  -4   5  -3   20.98    2.21
  -4   5  -4  184.83    6.10
   4  -5   4  180.22    3.63
  -4   5  -5  202.13    6.46
   4  -5   5  189.28    4.42
  -4   5  -6   12.21    1.69
   4  -5   6   11.29    1.37
   4  -5   7   28.62    2.15
  -4   5  -7   30.02    2.70
   4  -5   8   11.39    1.64
  -4   5  -8   15.90    2.07
   4  -5   9  169.63    5.97
  -4   5  -9  190.46    7.03
  -4   4   9   46.17    4.86
  -4   4   8    8.67    2.14
  -4   4   7    0.67    1.26
  -4   4   6    8.36    1.99
  -4   4   5  237.19    8.36
  -4   4   4   29.24    2.86
  -4   4   3   10.17    1.76
  -4   4   2    4.43    1.09
  -4   4   1   40.19    2.88
  -4   4  -1    6.86    1.20
   4  -4   2  574.61    2.93
  -4   4  -2  717.34   11.37
   4  -4   3   16.50    0.98
  -4   4  -3   16.25    1.83
  -4   4  -4   50.53    2.98
   4  -4   4   52.72    2.08
  -4   4  -5  181.33    5.84
   4  -4   5  189.90    4.41
  -4   4  -6  124.47    4.92
   4  -4   6  122.53    3.98
  -4   4  -7    0.24    0.92
   4  -4   7    0.14    0.68
  -4   4  -8    2.66    0.89
   4  -4   8    6.25    1.35
   4  -4   9   20.00    2.18
  -4   4  -9   24.78    2.60
  -4   4 -10   77.17    4.57
   4  -4  10   70.54    4.12
  -4   3   9  101.45    6.76
  -4   3   8   31.62    3.62
  -4   3   8   21.35    1.99
  -4   3   7  201.44    8.47
  -4   3   7  173.15    4.88
  -4   3   6   80.15    5.07
  -4   3   6   73.77    2.87
  -4   3   5 1238.92   18.30
  -4   3   5 1182.06   10.21
  -4   3   4   89.17    4.68
  -4   3   4   91.49    2.42
  -4   3   3    1.29    0.83
  -4   3   3    0.03    0.28
  -4   3   2  131.05    5.09
  -4   3   1   25.82    2.20
  -4   3   0  308.55    7.06
  -4   3  -1   15.10    1.65
   4  -3   2  126.07    2.02
   4  -3   3  939.15    7.36
  -4   3  -3  935.77   12.03
  -4   3  -4   28.67    2.19
  -4   3  -4   23.32    1.82
   4  -3   4   29.02    1.63
  -4   3  -5  603.19    9.96
   4  -3   5  586.98    7.71
  -4   3  -6 1089.75   13.77
   4  -3   6 1092.39   11.68
  -4   3  -7    1.12    0.72
   4  -3   7    0.58    0.72
   4  -3   8   -1.00    0.97
  -4   3  -8    0.01    0.81
   4  -3   9   17.23    2.02
  -4   3  -9   22.44    2.35
  -4   3 -10   58.51    3.82
   4  -3  10   45.89    3.27
  -4   3 -11   30.03    3.03
   4  -3  11   31.95    2.96
  -4   2  10   69.73    5.86
  -4   2  10   45.52    3.35
  -4   2   9  207.28    9.26
  -4   2   8  233.85    9.26
  -4   2   8  215.68    6.34
  -4   2   7    4.49    1.67
  -4   2   7    2.80    0.80
  -4   2   6   13.04    2.04
  -4   2   6   14.64    1.56
  -4   2   5    9.79    1.72
  -4   2   5    8.18    1.09
  -4   2   4  320.03    5.93
  -4   2   4  323.04    8.38
  -4   2   3   16.84    1.21
  -4   2   3   17.78    1.89
  -4   2   2  302.97    4.24
   4  -2  -2  279.57    5.00
  -4   2   2  311.34    7.24
  -4   2   2  280.69    3.08
  -4   2   1  144.23    2.44
   4  -2  -1  142.17    3.81
  -4   2   1  145.95    3.50
  -4   2   1  154.93    1.91
  -4   2   1  153.98    4.87
  -4   2   0 1184.80    5.05
  -4   2   0 1179.34   12.85
  -4   2  -1    8.47    0.56
  -4   2  -1    8.05    1.10
  -4   2  -2    8.41    0.74
   4  -2   2    7.57    0.60
  -4   2  -2    8.29    1.14
  -4   2  -3    1.22    0.51
  -4   2  -3    0.44    0.55
   4  -2   3    0.13    0.39
  -4   2  -4  136.86    3.92
   4  -2   4  151.91    3.47
  -4   2  -5 1021.74   12.34
   4  -2   5 1030.80   10.24
   4  -2   6  387.00    6.93
  -4   2  -6  379.49    7.76
   4  -2   7  609.47    9.44
  -4   2  -7  605.93   10.05
   4  -2   8  259.71    6.62
  -4   2  -8  271.61    7.24
  -4   2  -9    1.19    0.79
   4  -2   9    3.09    1.08
  -4   2 -10   59.79    3.74
   4  -2  10   65.70    3.87
  -4   2 -11    9.90    1.94
   4  -2  11    9.03    1.76
  -4   1  10  284.01   10.94
  -4   1  10  251.10    7.95
  -4   1   9  158.37    7.75
  -4   1   9  145.01    5.78
  -4   1   8   42.55    3.90
  -4   1   8   39.82    2.91
  -4   1   7  348.09   10.29
  -4   1   7  320.13    7.86
  -4   1   6   85.79    4.77
  -4   1   6   90.05    3.83
  -4   1   5   24.47    2.52
  -4   1   5   33.99    2.24
  -4   1   4   57.71    3.47
  -4   1   3    0.50    0.62
  -4   1   3    0.32    0.50
  -4   1   2  282.76    6.47
   4  -1  -2  265.17    3.74
  -4   1   1 1642.79   14.49
  -4   1   1 1629.07    9.49
  -4   1   1 1634.69    8.15
  -4   1   0 2189.52    8.98
  -4   1   0 2189.56   15.81
  -4   1  -1   13.59    0.78
  -4   1  -1   15.15    1.36
  -4   1  -2  200.09    3.36
   4  -1   2  188.22    3.04
  -4   1  -2  199.03    4.78
  -4   1  -3   98.74    3.39
  -4   1  -3   94.05    2.67
   4  -1   3  102.31    2.59
  -4   1  -4 1103.05   11.52
   4  -1   4 1135.00    9.70
   4  -1   5 1159.77   10.84
  -4   1  -5 1195.41   12.65
   4  -1   6  120.25    3.88
  -4   1  -7    0.56    0.61
   4  -1   7    0.88    0.79
  -4   1  -8  335.66    5.50
  -4   1  -8  321.61    7.49
  -4   1  -9  267.52    7.16
   4  -1   9  260.86    7.09
   4  -1  10  114.05    5.00
  -4   1 -10  125.53    5.21
  -4   1 -11    3.99    1.27
   4  -1  11    3.72    1.54
   4  -1  12   80.88    4.63
  -4   0  10  173.74    8.46
  -4   0  10  152.50    6.61
  -4   0   9   26.97    3.36
  -4   0   9   25.12    2.64
  -4   0   8  183.90    7.60
  -4   0   8  173.12    6.41
  -4   0   7   68.18    4.43
  -4   0   7   79.12    4.07
  -4   0   6 1052.34   15.90
  -4   0   6 1041.86   14.04
  -4   0   5  362.42    8.70
  -4   0   5  393.63    8.06
  -4   0   4  427.80    7.94
  -4   0   4  411.26    8.48
  -4   0   3   47.16    2.65
  -4   0   2    2.42    0.29
  -4   0   1    3.84    0.70
  -4   0   1    3.53    0.46
   4   0  -1    2.14    0.77
  -4   0   0  574.42    7.34
  -4   0   0  568.23    5.28
   4   0   1 1438.53   12.80
  -4   0  -1 1458.85    8.59
  -4   0  -1 1436.43   11.46
   4   0   1 1436.82    8.31
   4   0   2  340.47    4.40
  -4   0  -2  345.54    4.43
  -4   0  -3    1.76    0.46
   4   0   3    2.76    0.55
  -4   0  -4 4984.91   23.03
   4   0   4 4764.36   20.45
   4   0   5  505.99    7.21
  -4   0  -5  496.72    7.67
   4   0   6  232.37    5.34
  -4   0  -6  230.74    4.83
  -4   0  -6  245.86    5.72
   4   0   7   34.42    2.32
  -4   0  -7   39.53    1.97
  -4   0  -7   41.37    2.53
  -4   0  -8   31.95    1.65
   4   0   8   36.31    2.51
  -4   0  -9   59.32    3.33
   4   0   9   54.13    3.18
  -4   0 -10   48.99    3.21
   4   0  10   45.04    3.08
   4   0  11    7.08    1.64
   4   0  12   13.11    2.04
  -4  -1  10   85.17    5.09
  -4  -1   9   14.06    2.19
  -4  -1   8   41.36    3.26
  -4  -1   8   44.24    2.55
  -4  -1   7   23.83    2.65
  -4  -1   7   22.78    2.45
  -4  -1   7   26.75    2.05
  -4  -1   6  923.74   14.32
  -4  -1   6  935.07   13.76
  -4  -1   5  239.61    6.61
  -4  -1   5  261.68    7.01
  -4  -1   4  218.35    5.79
  -4  -1   3   24.66    1.79
  -4  -1   2    9.56    1.02
   4   1  -1  283.85    5.61
  -4  -1   1  277.40    4.79
   4   1   0  702.87    8.20
  -4  -1   0  691.35    7.11
  -4  -1   0  702.50    6.51
   4   1   1   49.04    2.14
  -4  -1  -1   49.04    1.74
  -4  -1  -1   49.57    1.90
   4   1   1   50.54    1.73
  -4  -1  -2  456.40    5.88
   4   1   2  463.60    5.41
   4   1   2  472.48    6.52
  -4  -1  -3  490.41    6.36
  -4  -1  -3  484.65    5.98
   4   1   3  499.02    6.07
   4   1   3  493.62    6.90
  -4  -1  -4 3033.06   16.74
   4   1   4 3034.91   16.35
  -4  -1  -4 3034.76   18.00
   4   1   5    8.66    1.10
  -4  -1  -5    7.28    0.91
  -4  -1  -5    7.97    1.00
  -4  -1  -6  476.56    7.63
  -4  -1  -6  457.30    6.48
  -4  -1  -7  271.93    6.14
  -4  -1  -7  263.10    4.75
  -4  -1  -8   26.94    2.21
  -4  -1  -8   23.07    1.37
   4   1   9   82.08    3.94
  -4  -1  -9   92.19    4.11
  -4  -1  -9   90.13    2.29
   4   1  10  117.36    4.99
   4   1  11    3.58    1.30
   4   1  12    1.43    1.48
  -4  -2  10   -0.83    1.13
  -4  -2   9   19.39    2.47
  -4  -2   8   32.01    3.02
  -4  -2   7    9.03    1.13
  -4  -2   7    6.19    1.26
  -4  -2   6 1124.76   15.78
  -4  -2   6 1139.22   12.10
  -4  -2   5   44.66    2.73
  -4  -2   5   47.88    3.20
  -4  -2   5   49.20    2.54
  -4  -2   4  941.10   11.12
  -4  -2   4  994.91   11.27
  -4  -2   3 1693.10   14.65
  -4  -2   3 1686.88    6.52
  -4  -2   2  364.87    5.13
   4   2  -2  374.31    4.24
  -4  -2   2  376.74    6.79
  -4  -2   1  306.73    4.04
   4   2   0  280.24    4.49
  -4  -2   0  282.79    4.35
  -4  -2   0  289.73    3.74
  -4  -2  -1  110.78    2.40
   4   2   1  108.44    2.63
  -4  -2  -1  104.38    2.78
  -4  -2  -2  192.19    3.75
  -4  -2  -2  204.84    4.83
   4   2   2  214.05    3.95
  -4  -2  -2  193.77    3.49
   4   2   2  212.07    3.83
  -4  -2  -3  274.57    5.56
   4   2   3  278.06    4.68
  -4  -2  -3  267.17    4.36
   4   2   4 2332.93   14.65
  -4  -2  -4 2335.50   15.55
  -4  -2  -5  119.98    3.52
   4   2   5  121.31    3.59
  -4  -2  -5  126.01    3.50
  -4  -2  -6   10.18    1.20
   4   2   6   10.61    1.29
  -4  -2  -6   11.52    1.08
   4   2   7   10.25    1.38
  -4  -2  -7    9.28    1.15
  -4  -2  -7   11.70    1.10
   4   2   8  384.85    7.89
  -4  -2  -8  377.05    5.37
  -4  -2  -9    7.75    0.80
   4   2   9    7.43    1.31
   4   2  10  163.44    5.72
   4   2  11   71.61    4.08
   4   2  12   19.66    2.37
  -4  -3  10  111.25    6.08
  -4  -3   9  118.72    6.12
  -4  -3   8    7.44    1.95
  -4  -3   7   40.04    3.48
  -4  -3   7   46.17    2.29
  -4  -3   6   25.04    2.70
  -4  -3   6   26.94    1.89
  -4  -3   5    6.63    0.84
  -4  -3   5   10.17    1.18
  -4  -3   4   16.46    1.44
  -4  -3   4   15.02    1.01
  -4  -3   4   17.24    1.53
  -4  -3   3  103.01    2.81
  -4  -3   3   99.87    2.36
  -4  -3   3  108.26    3.62
   4   3  -2 4697.02   18.56
  -4  -3   2 4717.55   23.69
  -4  -3   1   48.75    2.43
  -4  -3   1   50.14    1.13
   4   3   0 2804.47   10.63
  -4  -3   0 2824.34    8.25
  -4  -3  -1   90.44    3.29
   4   3   1   86.91    1.97
  -4  -3  -1   85.58    1.74
  -4  -3  -2    4.17    0.91
   4   3   2    4.48    0.57
  -4  -3  -2    3.10    0.43
   4   3   2    4.57    0.76
   4   3   3  295.41    4.66
  -4  -3  -3  289.87    4.38
   4   3   3  289.36    4.99
  -4  -3  -3  294.69    5.75
   4   3   4  679.32    7.84
  -4  -3  -4  683.82    7.55
  -4  -3  -4  664.88    8.53
   4   3   5   50.52    2.44
  -4  -3  -5   49.65    2.26
  -4  -3  -5   51.03    2.33
  -4  -3  -6   26.78    1.67
  -4  -3  -7    9.10    1.02
   4   3   8   61.01    3.27
  -4  -3  -8   28.62    1.74
  -4  -3  -9    0.54    0.45
   4   3   9    1.77    1.02
   4   3  10    5.26    1.33
   4   3  11   14.97    2.10
   4   3  12   22.56    2.52
  -4  -4  10  265.57    9.69
  -4  -4   9   72.97    4.98
  -4  -4   8   40.19    3.74
  -4  -4   7   19.12    2.47
  -4  -4   7   20.37    1.50
  -4  -4   6   86.64    5.07
  -4  -4   6   84.89    3.06
  -4  -4   5  458.02    5.77
  -4  -4   5  483.83    7.47
  -4  -4   4   24.15    1.14
  -4  -4   4   26.83    1.85
  -4  -4   3  683.08    4.54
  -4  -4   3  702.00    7.46
  -4  -4   3  697.41    9.35
   4   4  -2  105.51    3.25
  -4  -4   2  108.46    3.71
   4   4  -1 1198.58   11.86
  -4  -4   1 1174.59   12.14
  -4  -4   0  225.30    5.32
  -4  -4  -1 1020.66   11.24
   4   4   1 1014.76    5.29
   4   4   2   33.47    1.30
  -4  -4  -2   30.57    2.00
   4   4   2   30.50    1.69
   4   4   3   28.69    1.44
   4   4   3   28.13    1.74
  -4  -4  -3   26.88    1.88
   4   4   4   81.67    2.97
   4   4   4   85.26    2.84
  -4  -4  -4   86.79    3.18
   4   4   5  240.15    5.28
  -4  -4  -5  231.12    5.14
   4   4   6  278.44    6.02
  -4  -4  -6  270.78    5.49
   4   4   7   81.74    3.53
  -4  -4  -7   77.80    2.87
   4   4   8   48.29    3.07
  -4  -4  -8   15.41    1.61
   4   4   9  415.58    8.91
  -4  -4  -9  423.28    6.27
   4   4  10  192.03    6.33
  -4  -4 -10  204.88    4.26
   4   4  11   -1.54    0.97
   4   4  12    0.40    0.99
  -4  -5   9   22.38    2.99
  -4  -5   8  599.23   14.09
  -4  -5   7   67.84    4.79
  -4  -5   6  784.45    9.35
  -4  -5   5  870.28    9.88
  -4  -5   4   31.24    2.00
  -4  -5   4   31.59    1.18
  -4  -5   3   12.89    1.27
  -4  -5   3   12.16    1.31
   4   5  -2  293.42    6.21
  -4  -5   2  276.06    6.01
   4   5  -1   49.69    2.72
  -4  -5   1   51.63    2.68
   4   5   0  229.01    5.83
  -4  -5   0  227.12    5.43
   4   5   1  416.12    3.76
   4   5   1  424.54    3.08
  -4  -5  -1  428.20    7.43
   4   5   2  223.71    3.37
   4   5   3  690.26    8.44
  -4  -5  -3  678.28    9.13
   4   5   3  670.63    6.94
   4   5   4  678.54    8.69
  -4  -5  -4  673.44    9.23
   4   5   5  272.54    5.82
  -4  -5  -5  281.65    5.91
   4   5   6    1.58    0.81
  -4  -5  -6    1.34    0.62
   4   5   7   44.91    2.67
  -4  -5  -7   41.33    2.22
   4   5   8  729.46   10.93
  -4  -5  -8  769.82    9.24
   4   5   9  669.30   11.17
  -4  -5  -9  662.19    8.47
   4   5  10  502.57   10.05
  -4  -5 -10  507.84    7.28
   4   5  11    5.68    1.36
   4   5  12   19.48    2.47
  -4  -6   8   15.06    2.78
  -4  -6   7  846.91   16.59
  -4  -6   6   32.13    3.31
  -4  -6   6   25.66    1.76
  -4  -6   5  302.04    6.04
  -4  -6   4  704.79    9.53
  -4  -6   4  639.99    9.11
  -4  -6   3   10.05    1.24
  -4  -6   3   10.30    1.28
  -4  -6   2    2.28    0.76
   4   6  -2    3.45    0.96
  -4  -6   2    1.73    0.80
   4   6  -1 1261.02   14.27
  -4  -6   1 1257.42   13.12
  -4  -6   0   28.32    2.09
   4   6   0   29.45    2.40
   4   6   1    9.26    0.63
   4   6   1    7.68    1.38
  -4  -6  -1   10.22    1.22
   4   6   1    8.57    0.55
  -4  -6  -2    2.06    0.78
   4   6   2    3.91    0.73
   4   6   2    2.80    0.49
   4   6   3   84.83    2.68
   4   6   3   88.09    3.18
  -4  -6  -3   91.62    3.66
   4   6   4    1.79    0.63
  -4  -6  -4    0.79    0.69
   4   6   5    0.93    0.71
  -4  -6  -5   -0.55    0.66
   4   6   6   24.00    1.93
  -4  -6  -6   22.82    1.87
   4   6   7   89.08    3.77
  -4  -6  -7   88.34    3.41
   4   6   8    3.83    1.02
  -4  -6  -8    3.45    0.92
  -4  -6  -9    4.92    0.93
   4   6   9    2.79    1.21
  -4  -6 -10    5.73    0.93
   4   6  10    4.91    1.24
   4   6  11  105.83    5.00
   4   6  12    0.40    1.12
  -4  -7   8   16.52    2.81
  -4  -7   7   22.23    3.07
  -4  -7   6   38.70    3.83
  -4  -7   6   48.67    2.45
  -4  -7   5  563.45    8.77
  -4  -7   4   27.38    1.98
  -4  -7   3  533.48    9.14
  -4  -7   3  482.44    8.13
  -4  -7   2    0.48    0.54
   4   7  -2    0.75    0.77
  -4  -7   2   -0.16    0.68
   4   7  -1 2032.43   19.63
  -4  -7   1 1942.69   16.82
   4   7   0  275.25    7.37
  -4  -7   0  273.80    6.39
   4   7   1  650.88   11.77
   4   7   1  618.33    5.23
  -4  -7  -1  641.56    9.79
   4   7   1  635.90    5.75
   4   7   2   11.85    1.12
   4   7   2    9.12    1.46
  -4  -7  -2    7.54    1.13
   4   7   3   22.95    1.83
   4   7   3   17.65    1.39
  -4  -7  -3   20.51    1.87
   4   7   4  166.37    4.70
  -4  -7  -4  176.88    5.32
   4   7   5   33.17    2.21
  -4  -7  -5   28.77    2.13
   4   7   6  554.41    9.17
  -4  -7  -6  558.75    8.98
   4   7   7  105.78    4.24
  -4  -7  -7  104.99    3.94
   4   7   8    3.83    1.15
  -4  -7  -8    1.92    0.73
   4   7   9    3.61    1.23
  -4  -7  -9    3.84    0.97
   4   7  10  359.52    8.91
  -4  -7 -10  342.82    7.13
   4   7  11  117.31    5.31
  -4  -8   7   89.35    5.95
  -4  -8   6    1.76    1.74
  -4  -8   5   18.08    1.62
  -4  -8   4  286.10    7.26
  -4  -8   4  269.92    6.26
  -4  -8   3   45.96    2.67
  -4  -8   3   55.16    3.30
  -4  -8   2   48.71    3.04
  -4  -8   2   42.05    2.59
   4   8  -1  129.70    5.39
  -4  -8   1  118.04    4.94
  -4  -8   1  123.08    4.55
   4   8   0    3.72    0.45
  -4  -8   0    3.34    0.92
   4   8   0    5.52    1.39
   4   8   1   -0.31    0.84
  -4  -8  -1    0.61    0.90
   4   8   1   -0.09    0.40
   4   8   2  115.41    3.51
   4   8   2  111.59    5.39
  -4  -8  -2  113.92    4.39
   4   8   3   52.97    2.81
   4   8   3   44.99    3.63
  -4  -8  -3   48.14    2.94
   4   8   4   58.55    3.34
  -4  -8  -4   51.74    2.99
   4   8   5   32.92    2.29
  -4  -8  -5   35.24    2.53
   4   8   6   23.24    1.98
  -4  -8  -6   19.13    1.87
   4   8   7   -0.43    0.74
  -4  -8  -7   -0.31    0.66
   4   8   8   13.06    1.76
  -4  -8  -8   10.58    1.44
   4   8   9   16.41    1.96
  -4  -8  -9   21.23    1.99
   4   8  10   17.08    2.10
  -4  -8 -10   17.31    1.84
  -4  -9   5  126.88    4.52
  -4  -9   4  104.91    4.78
  -4  -9   4   98.03    3.98
  -4  -9   3   60.02    3.60
  -4  -9   3   56.48    3.08
  -4  -9   2  117.64    4.99
  -4  -9   2  117.31    4.46
  -4  -9   1    0.28    0.71
   4   9  -1   -0.06    1.20
  -4  -9   1    0.47    0.88
   4   9   0  159.02    6.45
  -4  -9   0  139.85    5.67
  -4  -9   0  146.58    5.16
  -4  -9  -1   -0.29    0.76
   4   9   1    0.26    1.04
   4   9   2   19.26    2.39
   4   9   2   21.13    1.63
  -4  -9  -2   21.71    2.05
   4   9   3   72.56    3.38
   4   9   3   70.79    4.65
  -4  -9  -3   67.62    3.54
   4   9   4  427.75   11.64
  -4  -9  -4  410.08    8.78
   4   9   5  244.11    7.66
  -4  -9  -5  230.83    6.55
   4   9   6   76.84    4.71
   4   9   6   68.31    4.86
   4   9   6   67.39    3.44
  -4  -9  -6   65.13    3.59
   4   9   7  405.28    8.51
  -4  -9  -7  391.81    8.45
   4   9   8   12.71    1.86
   4   9   8   14.75    2.67
  -4  -9  -8   14.61    1.81
   4   9   9   32.62    3.84
   4   9   9   33.62    2.89
  -4  -9  -9   38.21    2.82
  -4 -10   4    0.08    0.76
  -4 -10   4    2.11    1.33
  -4 -10   3   10.11    1.93
  -4 -10   3   10.09    1.57
  -4 -10   2  191.72    6.81
  -4 -10   2  196.87    6.17
  -4 -10   1    6.32    1.31
  -4 -10   1    7.99    1.61
   4  10   0  372.57   10.67
  -4 -10   0  348.63    9.25
  -4 -10   0  363.00    8.54
   4  10   1   49.73    3.93
  -4 -10  -1   54.70    3.83
  -4 -10  -1   48.88    3.21
  -4 -10  -2    1.47    0.85
   4  10   2    3.43    1.58
  -4 -10  -3   -0.47    0.87
   4  10   4  145.39    7.01
  -4 -10  -4  139.60    5.45
   4  10   5    1.84    1.17
  -4 -10  -5    2.97    1.16
   4  10   5    1.18    1.34
   4  10   6   39.55    3.48
   4  10   6   40.85    4.08
  -4 -10  -6   48.12    3.22
   4  10   7   25.68    3.15
   4  10   7   29.19    3.67
  -4 -10  -7   29.78    2.59
   4  10   8    2.82    1.14
  -4 -10  -8    3.30    1.28
   4  10   8    2.53    1.82
   4  10   8    2.86    1.96
  -4 -11   1   13.84    2.09
  -4 -11   1   11.24    1.78
  -4 -11   0   33.98    3.18
  -4 -11   0   30.95    2.71
  -4 -11  -1    2.55    1.00
   4  11   1    4.78    1.87
  -4 -11  -1    4.29    1.46
   4  11   2  184.59    8.08
  -4 -11  -2  183.99    7.51
  -4 -11  -2  195.63    6.72
  -4 -11  -3   21.61    2.38
   4  11   4  185.69    8.26
  -4 -11  -4  195.34    6.76
  -4 -11  -5    0.68    0.90
   4  11   5    1.73    1.88
  -5   7   2   70.58    4.79
  -5   7   1   67.83    4.62
  -5   7   0    6.09    1.68
  -5   7  -1  202.13    7.69
  -5   7  -2   10.94    2.05
  -5   7  -3   18.77    2.59
  -5   7  -4   30.70    3.07
  -5   6   5   42.23    4.02
  -5   6   4  165.87    7.51
  -5   6   3   -0.47    1.10
  -5   6   2  114.04    5.74
  -5   6   1  233.57    8.07
  -5   6   0   66.92    4.25
  -5   6  -1  219.38    7.50
  -5   6  -2    9.07    1.69
  -5   6  -3   67.02    4.23
  -5   6  -4   21.78    2.58
  -5   6  -5   65.17    4.24
  -5   6  -6  218.56    7.78
  -5   5   6    1.54    1.39
  -5   5   5   26.52    3.13
  -5   5   4    8.10    1.95
  -5   5   3   96.92    5.33
  -5   5   2   35.53    3.09
  -5   5   1   99.99    5.01
  -5   5  -1   82.33    4.38
  -5   5  -2   91.21    4.55
  -5   5  -3   19.68    2.23
  -5   5  -4   35.70    2.92
  -5   5  -5  206.45    6.94
  -5   5  -6   64.45    4.09
  -5   5  -7   70.03    4.34
  -5   5  -8  285.98    8.65
  -5   4   7  135.52    7.28
  -5   4   6   54.63    4.46
  -5   4   5  105.52    5.77
  -5   4   4  253.78    8.59
  -5   4   3    2.88    1.02
  -5   4   2   51.26    3.55
  -5   4   1   56.18    3.62
  -5   4   0  210.78    6.74
  -5   4  -1  497.06   10.10
  -5   4  -3  293.09    7.72
  -5   4  -4  425.09    9.24
   5  -4   4  405.75    5.17
  -5   4  -5   45.70    3.15
   5  -4   5   37.35    1.93
  -5   4  -6   19.01    2.16
   5  -4   6   18.60    1.58
  -5   4  -7    1.70    1.01
   5  -4   7    4.30    1.03
  -5   4  -8   12.66    1.92
   5  -4   8   10.26    1.54
  -5   4  -9    0.71    1.05
   5  -4   9    2.08    1.15
  -5   3   8    0.12    1.44
  -5   3   7  106.34    6.24
  -5   3   6  116.75    6.23
  -5   3   5    2.53    1.22
  -5   3   4  122.83    5.70
  -5   3   3   19.25    2.18
  -5   3   2    6.41    1.35
  -5   3   1    1.27    0.85
  -5   3   0 1115.55   14.45
  -5   3  -1  212.61    6.21
  -5   3  -2  995.36   13.32
   5  -3   3  579.95    5.49
  -5   3  -3  593.62   10.24
   5  -3   4  531.34    6.29
  -5   3  -5  616.07   10.79
   5  -3   5  623.37    7.96
  -5   3  -6   24.59    2.24
   5  -3   6   22.04    1.72
   5  -3   7   22.57    1.90
  -5   3  -7   24.26    2.36
   5  -3   8   74.56    3.61
  -5   3  -8   74.89    4.07
   5  -3   9   14.85    1.83
  -5   3  -9   17.61    2.29
  -5   3 -10   95.15    5.11
   5  -3  10   85.24    4.42
  -5   2   9   39.61    4.40
  -5   2   8    2.93    1.72
  -5   2   7  105.87    6.07
  -5   2   7   95.11    3.95
  -5   2   6  195.01    7.71
  -5   2   6  199.40    5.54
  -5   2   5   57.56    2.67
  -5   2   5   51.01    3.73
  -5   2   4  149.13    4.05
  -5   2   4  143.98    5.85
  -5   2   3  757.35    8.24
  -5   2   3  724.93   12.43
  -5   2   2  224.45    4.01
  -5   2   2  223.22    6.47
  -5   2   2  213.20    3.06
  -5   2   1   53.02    1.74
  -5   2   1   50.74    1.31
  -5   2   1   47.49    2.89
  -5   2   0   -0.70    0.65
  -5   2   0    0.53    0.28
  -5   2  -1  144.69    4.75
  -5   2  -2    4.49    1.02
   5  -2   2    3.76    0.47
  -5   2  -2    3.44    0.59
   5  -2   3  284.55    4.22
  -5   2  -3  285.83    6.78
  -5   2  -4 1792.66   17.01
   5  -2   4 1779.49   11.86
  -5   2  -5    8.69    1.27
   5  -2   5   10.16    1.16
   5  -2   6 1467.37   13.41
  -5   2  -7    0.00    0.82
   5  -2   7    0.11    0.62
   5  -2   8   17.12    1.84
  -5   2  -8   22.08    2.23
  -5   2  -9   -0.24    0.83
   5  -2   9    1.09    0.99
  -5   2 -10   21.78    2.46
   5  -2  10   25.75    2.49
  -5   2 -11    2.76    1.41
   5  -2  11    2.90    1.43
  -5   1   9  226.79    9.65
  -5   1   9  197.53    6.92
  -5   1   8   16.29    2.62
  -5   1   8   11.68    1.78
  -5   1   7   13.22    2.25
  -5   1   7   12.82    1.75
  -5   1   6   71.78    3.59
  -5   1   6   70.88    4.55
  -5   1   5   34.69    2.46
  -5   1   5   31.63    2.87
  -5   1   4  295.82    6.78
  -5   1   4  271.75    7.59
  -5   1   3   19.14    1.79
  -5   1   3   21.99    2.14
   5  -1  -2  156.40    3.23
  -5   1   2  159.40    3.03
  -5   1   1 1842.24    9.70
  -5   1   1 1799.92   11.17
  -5   1   0   31.47    1.26
  -5   1   0   28.95    1.62
  -5   1   0   30.16    2.10
  -5   1  -1  465.44    5.00
  -5   1  -1  473.72    8.00
  -5   1  -2  170.08    3.38
   5  -1   2  178.66    3.19
  -5   1  -2  180.73    4.98
  -5   1  -3   15.07    1.45
   5  -1   3   15.08    1.11
  -5   1  -4  652.23    9.69
   5  -1   4  629.55    7.36
  -5   1  -5    9.16    1.30
   5  -1   5   10.46    1.15
   5  -1   6   31.06    2.07
  -5   1  -6   34.62    2.42
  -5   1  -7   66.72    3.46
   5  -1   7   71.91    3.23
   5  -1   8  133.67    4.67
  -5   1  -8  142.20    4.34
  -5   1  -9  163.13    5.90
   5  -1   9  161.02    5.58
  -5   1 -10    0.03    0.84
   5  -1  10   -1.11    1.03
   5  -1  11   66.42    4.04
  -5   1 -11   70.15    4.32
  -5   0   9  242.20    9.56
  -5   0   9  234.59    7.92
  -5   0   8    9.16    1.79
  -5   0   8    8.59    2.00
  -5   0   7  146.31    6.62
  -5   0   7  148.47    5.88
  -5   0   6   13.97    1.86
  -5   0   6   15.03    2.07
  -5   0   5  456.45    9.06
  -5   0   5  410.14    9.65
  -5   0   4   73.31    3.63
  -5   0   4   58.96    3.35
  -5   0   3  168.92    5.22
  -5   0   2  455.78    8.03
  -5   0   2  437.48    3.86
  -5   0   1  166.37    4.53
  -5   0   1  157.94    3.18
  -5   0   0  721.81    9.22
  -5   0   0  711.72    6.82
  -5   0  -1    4.26    0.61
  -5   0  -1    6.55    0.88
  -5   0  -2  251.35    4.17
   5   0   2  267.06    4.21
  -5   0  -3  244.95    5.43
   5   0   3  250.24    4.40
  -5   0  -4   86.84    3.39
   5   0   4   89.88    2.89
  -5   0  -5  760.92   10.16
   5   0   5  736.77    8.90
   5   0   6   58.34    2.79
  -5   0  -6   63.62    3.00
  -5   0  -7  561.38    8.56
  -5   0  -7  549.16    9.51
  -5   0  -8   18.58    1.93
   5   0   8   15.38    1.67
  -5   0  -8   16.98    1.57
  -5   0  -9   33.76    2.62
   5   0   9   34.91    2.65
  -5   0  -9   31.29    1.85
   5   0  10   71.93    3.94
   5   0  11   27.78    2.74
  -5   0 -11   31.83    2.90
   5   0  12   24.69    2.71
  -5  -1   9   15.54    2.66
  -5  -1   9   16.07    2.53
  -5  -1   8  160.83    7.09
  -5  -1   8  161.85    6.61
  -5  -1   7   38.25    3.32
  -5  -1   7   33.14    3.02
  -5  -1   7   38.68    2.76
  -5  -1   6   79.58    4.28
  -5  -1   6   76.23    4.29
  -5  -1   5 2665.13   23.34
  -5  -1   5 2576.71   22.89
  -5  -1   4  111.49    4.34
  -5  -1   3  192.35    5.12
  -5  -1   1   25.60    1.64
  -5  -1   0    3.25    0.64
  -5  -1  -1  710.29    7.14
  -5  -1  -2 1809.07   13.08
   5   1   2 1725.99   11.41
  -5  -1  -3  224.95    4.82
   5   1   3  220.33    4.29
  -5  -1  -4   11.48    1.22
  -5  -1  -4    9.21    1.19
   5   1   4   10.40    1.09
   5   1   5  307.95    5.84
  -5  -1  -5  310.08    6.58
  -5  -1  -5  291.25    5.98
   5   1   6   54.83    2.73
  -5  -1  -6   56.91    2.76
  -5  -1  -6   53.96    2.81
  -5  -1  -7   13.89    1.54
   5   1   7   13.07    1.55
  -5  -1  -7   13.95    1.39
  -5  -1  -8  109.23    4.29
   5   1   8  100.23    4.15
  -5  -1  -8  104.22    3.41
   5   1   9  268.97    7.10
  -5  -1  -9  274.34    5.06
   5   1  10  359.03    8.53
  -5  -1 -10  397.29    9.08
   5   1  11  148.33    5.74
   5   1  12   36.26    3.13
  -5  -2   9   64.75    4.64
  -5  -2   9   76.39    4.95
  -5  -2   8   36.60    3.34
  -5  -2   8   36.52    3.39
  -5  -2   7   19.84    2.43
  -5  -2   7   27.24    3.04
  -5  -2   7   21.73    2.02
  -5  -2   6   25.78    2.64
  -5  -2   6   30.64    2.63
  -5  -2   6   27.49    2.19
  -5  -2   5 1067.57   15.33
  -5  -2   5 1080.39   13.67
  -5  -2   5 1051.51   13.17
  -5  -2   4   59.45    2.97
  -5  -2   4   59.32    3.13
  -5  -2   3  203.83    4.73
  -5  -2   3  209.46    5.78
  -5  -2   2    1.71    0.75
  -5  -2   2    1.94    0.52
   5   2  -1  141.18    4.12
  -5  -2   1  145.53    3.30
  -5  -2   1  146.82    4.76
  -5  -2   0  755.57   10.67
  -5  -2   0  778.47    7.44
  -5  -2  -1 2491.37   13.48
   5   2   1 2523.11   15.64
  -5  -2  -2    3.78    0.98
  -5  -2  -2    3.44    0.59
   5   2   2    3.52    0.74
   5   2   2    3.21    0.67
  -5  -2  -3  131.81    4.32
   5   2   3  132.16    3.50
   5   2   4  550.79    7.50
  -5  -2  -4  565.44    8.83
  -5  -2  -4  540.85    7.37
   5   2   5   20.82    1.65
  -5  -2  -5   19.27    1.62
  -5  -2  -5   20.56    1.57
  -5  -2  -6  150.45    4.36
   5   2   6  145.66    4.47
  -5  -2  -6  150.10    4.30
  -5  -2  -7    1.88    0.69
  -5  -2  -7    3.15    0.85
   5   2   7    2.89    0.90
  -5  -2  -8   39.98    2.61
   5   2   8   35.97    2.65
  -5  -2  -8   34.69    1.99
  -5  -2  -9    1.02    0.59
  -5  -2  -9    0.68    0.70
   5   2   9   -0.04    0.83
   5   2  10    2.09    1.20
   5   2  11   62.86    3.97
   5   2  12    5.28    1.64
  -5  -3   9  208.35    8.30
  -5  -3   8    0.51    1.08
  -5  -3   8    1.30    1.63
  -5  -3   7   21.56    2.38
  -5  -3   7   23.93    2.83
  -5  -3   7   19.71    1.80
  -5  -3   6    1.88    0.80
  -5  -3   6    2.29    0.88
  -5  -3   6    3.82    1.37
  -5  -3   5  765.30   10.77
  -5  -3   5  748.59   10.84
  -5  -3   4    1.96    0.89
  -5  -3   4    1.55    0.59
  -5  -3   3  423.12    5.87
  -5  -3   3  428.51    8.14
   5   3  -2   82.33    2.57
  -5  -3   2   83.13    2.20
  -5  -3   2   83.16    3.55
  -5  -3   1  400.49    7.78
  -5  -3   1  405.45    4.42
  -5  -3   0   15.74    0.87
   5   3   0   14.40    1.12
  -5  -3   0   14.91    1.65
  -5  -3  -1 1043.44    7.35
   5   3   1 1081.80    8.78
  -5  -3  -1 1064.46   12.47
  -5  -3  -2   53.70    1.82
  -5  -3  -2   53.33    2.80
   5   3   2   53.57    2.06
   5   3   2   49.59    2.16
  -5  -3  -3   97.87    3.74
   5   3   3   98.81    3.14
  -5  -3  -3  103.20    2.82
   5   3   3  102.60    3.06
  -5  -3  -4  685.33    7.71
  -5  -3  -4  678.48    9.46
  -5  -3  -5   32.21    1.94
   5   3   5   27.91    1.92
  -5  -3  -5   30.28    2.09
  -5  -3  -6  322.84    6.47
   5   3   6  313.80    6.56
  -5  -3  -7    5.15    1.11
  -5  -3  -7    5.86    0.96
   5   3   7    4.87    1.16
   5   3   8  158.04    5.21
  -5  -3  -8  164.98    4.27
  -5  -3  -9    0.02    0.49
   5   3   9    0.88    0.88
   5   3  10   97.54    4.71
  -5  -3 -10   86.95    2.84
   5   3  11   17.82    2.29
   5   3  12   -1.05    1.35
  -5  -4   9   77.95    5.32
  -5  -4   8   -0.83    1.39
  -5  -4   7  216.90    8.51
  -5  -4   7  216.35    5.42
  -5  -4   6   79.28    3.56
  -5  -4   6   82.54    4.94
  -5  -4   6   77.58    3.45
  -5  -4   5   15.83    1.45
  -5  -4   5   17.78    1.67
  -5  -4   4    2.49    0.79
  -5  -4   4    1.22    0.50
  -5  -4   4    1.66    0.59
  -5  -4   3   71.13    1.80
  -5  -4   3   73.58    2.46
  -5  -4   3   72.61    3.34
  -5  -4   3   69.36    1.58
   5   4  -2   15.11    1.32
  -5  -4   2   13.97    1.53
  -5  -4   2   16.17    0.58
  -5  -4   2   13.80    0.51
  -5  -4   1   51.59    2.75
  -5  -4   0  782.71    3.62
  -5  -4   0  794.78   10.72
  -5  -4  -1   64.41    1.48
   5   4   1   69.22    1.84
  -5  -4  -2  203.42    3.22
  -5  -4  -2  205.65    5.52
   5   4   2  212.51    3.62
   5   4   3  737.23    7.57
  -5  -4  -3  715.85    6.94
  -5  -4  -3  744.86   10.23
   5   4   3  746.53    8.91
   5   4   4  313.27    6.01
  -5  -4  -4  300.34    6.53
   5   4   5  878.02   10.67
  -5  -4  -5  875.09   10.83
   5   4   6   12.96    1.48
  -5  -4  -6   12.72    1.40
  -5  -4  -7  300.83    6.12
  -5  -4  -8   57.21    2.70
   5   4   9   38.44    2.92
  -5  -4  -9   38.64    2.23
  -5  -4 -10    0.67    0.62
   5   4  10    1.76    0.93
   5   4  11    0.66    0.92
   5   4  12  118.23    5.74
  -5  -5   8  128.53    6.80
  -5  -5   7   14.81    2.49
  -5  -5   6  424.14   11.31
  -5  -5   6  405.91    7.46
  -5  -5   5    1.17    0.70
  -5  -5   4   26.04    1.66
  -5  -5   4   22.82    1.94
  -5  -5   3    9.51    1.08
  -5  -5   3    8.61    1.24
   5   5  -2  224.73    5.32
  -5  -5   2  224.31    5.78
  -5  -5   1    0.70    0.60
   5   5  -1   -0.14    0.62
  -5  -5   0   93.61    3.75
  -5  -5  -1  399.77    7.70
   5   5   2   25.38    1.17
  -5  -5  -3    5.36    0.98
   5   5   3    5.26    0.72
   5   5   3    6.51    0.95
   5   5   4   11.04    1.28
  -5  -5  -4   15.05    1.58
   5   5   5  770.05   10.12
  -5  -5  -5  788.27   10.60
   5   5   6  132.46    4.46
  -5  -5  -6  125.56    4.20
   5   5   7 1167.47   13.83
  -5  -5  -7 1172.35   12.53
   5   5   8   44.28    2.89
  -5  -5  -8   48.59    2.53
   5   5   9  568.33   10.60
  -5  -5  -9  587.42    8.60
   5   5  10  377.64    9.02
  -5  -5 -10  382.06    6.77
   5   5  11   73.19    4.34
   5   5  12    7.56    1.77
  -5  -6   8   13.84    2.60
  -5  -6   7  553.38   14.57
  -5  -6   6    8.66    1.22
  -5  -6   5   17.21    1.64
  -5  -6   4   68.67    2.93
  -5  -6   4   58.15    2.98
  -5  -6   3   68.00    3.01
  -5  -6   3   65.62    3.21
   5   6  -2   81.08    3.65
  -5  -6   2   69.80    3.36
   5   6  -1  124.66    4.63
  -5  -6   1  119.59    4.36
   5   6   0 1064.01   14.09
  -5  -6   0 1007.76   12.79
  -5  -6  -1   70.25    3.34
   5   6   2   24.36    1.07
  -5  -6  -2   23.50    2.02
   5   6   3   63.15    2.16
  -5  -6  -3   66.07    3.24
   5   6   4   42.60    2.39
  -5  -6  -4   43.32    2.65
   5   6   5   11.89    1.50
  -5  -6  -5   10.48    1.38
   5   6   6  300.92    6.73
  -5  -6  -6  312.18    6.88
   5   6   7  255.24    6.68
  -5  -6  -7  247.46    6.00
   5   6   8  938.61   13.08
  -5  -6  -8  968.84   11.78
   5   6   9   29.08    2.49
  -5  -6  -9   31.95    2.14
   5   6  10   67.52    3.96
  -5  -6 -10   60.23    2.87
   5   6  11  103.92    5.11
  -5  -7   7   -0.13    1.95
  -5  -7   6   74.80    3.30
  -5  -7   5   84.85    3.55
  -5  -7   5   79.68    3.55
  -5  -7   4    9.24    1.35
  -5  -7   4   10.75    1.44
  -5  -7   3   13.15    1.57
  -5  -7   3    9.48    1.41
   5   7  -2    3.25    1.11
  -5  -7   2    4.51    1.12
  -5  -7   2    4.73    1.12
   5   7  -1  230.33    6.74
  -5  -7   1  220.12    6.10
   5   7   0  542.26   10.73
  -5  -7   0  542.13    9.62
   5   7   1  727.09   12.76
  -5  -7  -1  736.63   11.09
   5   7   2    9.37    0.81
   5   7   2    9.15    0.69
  -5  -7  -2    8.40    1.37
   5   7   3   36.48    2.06
   5   7   3   32.00    1.61
  -5  -7  -3   33.51    2.44
   5   7   4   -0.77    0.63
  -5  -7  -4    1.43    0.91
   5   7   5   58.86    3.04
  -5  -7  -5   53.78    3.03
   5   7   6  119.07    4.48
  -5  -7  -6  110.45    4.22
   5   7   7   82.45    3.96
  -5  -7  -7   77.01    3.63
   5   7   8   18.00    2.08
  -5  -7  -8   12.80    1.57
   5   7   9  452.18    9.83
  -5  -7  -9  433.40    8.14
   5   7  10  489.91   10.58
  -5  -7 -10  498.68    8.72
   5   7  11   13.84    2.07
  -5  -8   6    0.51    1.60
  -5  -8   5    4.48    1.03
  -5  -8   5    5.38    1.19
  -5  -8   4  158.42    5.44
  -5  -8   4  149.84    4.96
  -5  -8   3  127.62    4.87
  -5  -8   3  121.86    4.48
   5   8  -2   21.21    2.34
  -5  -8   2   22.62    2.18
  -5  -8   2   21.74    2.07
  -5  -8   1   -0.62    0.84
   5   8  -1    1.21    1.03
   5   8   0  320.76    8.62
  -5  -8   0  297.46    7.23
   5   8   1  277.91    8.35
  -5  -8  -1  251.95    6.73
   5   8   2  973.15   16.16
   5   8   2  993.39    7.91
  -5  -8  -2  980.73   12.94
   5   8   3  172.84    4.65
   5   8   4   15.36    1.74
  -5  -8  -4   15.40    1.80
   5   8   5  583.68    9.70
  -5  -8  -5  616.44   10.62
   5   8   6  199.74    5.93
  -5  -8  -6  201.56    6.01
   5   8   7   30.76    2.51
  -5  -8  -7   29.01    2.38
   5   8   8   14.04    1.83
  -5  -8  -8   13.96    1.65
   5   8   9    3.86    1.22
  -5  -8  -9    0.52    0.78
   5   8  10   50.72    3.67
  -5  -8 -10   54.58    3.12
  -5  -9   5    7.67    1.33
  -5  -9   4   12.69    1.83
  -5  -9   4   10.38    1.45
  -5  -9   3   10.88    1.60
  -5  -9   3   13.08    1.61
  -5  -9   2   38.88    2.97
  -5  -9   2   35.29    2.63
   5   9  -1    8.89    1.73
  -5  -9   1    9.19    1.72
  -5  -9   1    9.71    1.55
   5   9   0  142.09    6.13
  -5  -9   0  135.01    5.24
  -5  -9  -1    1.29    1.04
   5   9   1    1.00    1.09
   5   9   2   13.34    2.14
  -5  -9  -2   10.60    1.71
  -5  -9  -3    4.77    1.27
   5   9   3    8.15    1.94
   5   9   4  827.07   11.76
  -5  -9  -4  790.87   12.28
   5   9   5  113.20    4.93
  -5  -9  -5  105.65    4.56
   5   9   6  748.66   11.70
  -5  -9  -6  769.74   12.19
   5   9   7   49.53    3.98
   5   9   7   46.65    3.08
  -5  -9  -7   44.69    3.02
   5   9   8   10.21    1.72
  -5  -9  -8    9.50    1.56
   5   9   9   18.54    2.39
  -5  -9  -9   25.82    2.32
  -5 -10   3   62.35    3.94
  -5 -10   3   55.98    3.35
  -5 -10   2  228.50    7.39
  -5 -10   2  210.45    6.41
  -5 -10   1    1.20    0.83
   5  10  -1    0.15    1.15
  -5 -10   1    1.76    1.08
   5  10   0  167.78    7.22
  -5 -10   0  175.65    6.85
  -5 -10   0  161.80    5.87
   5  10   1   23.84    2.81
  -5 -10  -1   24.31    2.39
  -5 -10  -2    3.51    1.07
   5  10   2    2.66    1.38
  -5 -10  -3    1.34    0.96
   5  10   3    0.43    1.35
  -5 -10  -4    3.14    1.14
   5  10   4    3.26    1.72
   5  10   5    8.92    2.32
  -5 -10  -5   11.68    1.86
   5  10   6   11.73    2.47
  -5 -10  -6    9.33    1.70
   5  10   7  109.17    6.74
  -5 -10  -7  119.69    5.12
   5  10   8    1.42    1.15
  -5 -10  -8    0.75    1.19
   5  10   8    0.07    1.71
  -5 -11   0  421.99   10.93
  -5 -11   0  430.79    9.93
   5  11   1   13.90    2.64
  -5 -11  -1    8.65    1.95
  -5 -11  -1   16.06    2.08
  -5 -11  -2    7.52    1.61
   5  11   2   10.24    2.26
  -5 -11  -3    1.79    1.12
   5  11   3    1.23    1.87
  -5 -11  -4    0.93    1.00
   5  11   4   -0.10    1.71
   5  11   5  154.47    7.92
  -5 -11  -5  140.71    5.90
  -6   6   2  120.08    6.20
  -6   6   1    8.42    1.94
  -6   6   0    4.75    1.63
  -6   6  -1  142.54    6.58
  -6   6  -2  123.69    6.07
  -6   6  -3   12.05    2.21
  -6   6  -4   70.71    4.59
  -6   5   4   16.83    2.51
  -6   5   3    0.32    1.19
  -6   5   2   84.47    5.03
  -6   5   1   83.64    4.92
  -6   5   0    7.63    1.64
  -6   5  -1  303.06    8.84
  -6   5  -3    1.29    1.14
  -6   5  -4   -1.13    1.07
  -6   5  -5    1.86    1.24
  -6   5  -6   57.68    4.17
  -6   5  -7   18.61    2.48
  -6   4   6   63.81    4.98
  -6   4   5   29.31    3.29
  -6   4   4   39.90    3.68
  -6   4   3    9.93    1.86
  -6   4   2  145.31    6.25
  -6   4   1   35.87    2.99
  -6   4   0  324.91    8.82
  -6   4  -1  175.25    6.35
  -6   4  -2   63.49    3.84
  -6   4  -3   33.71    2.88
  -6   4  -5   54.40    3.71
  -6   4  -6   64.72    4.14
  -6   4  -7    0.01    0.96
  -6   4  -8   57.14    4.01
  -6   3   7    7.31    2.15
  -6   3   6    3.25    1.67
  -6   3   5  255.91    8.97
  -6   3   4  301.87    9.12
  -6   3   3  267.55    8.38
  -6   3   2   64.12    3.89
  -6   3   1    4.91    1.27
  -6   3   0  143.22    5.55
  -6   3  -1  420.85    9.27
  -6   3  -2  745.20   12.30
  -6   3  -3   19.82    2.13
  -6   3  -4   62.07    3.58
   6  -3   4   61.81    2.11
  -6   3  -5   11.32    1.74
   6  -3   5    7.10    0.93
   6  -3   6  182.03    4.72
  -6   3  -7    2.60    1.18
   6  -3   7    3.03    0.94
  -6   3  -8   10.40    1.82
   6  -3   8    5.35    1.29
  -6   3  -9    2.16    1.37
   6  -3   9    3.86    1.27
  -6   2   7    2.14    1.48
  -6   2   6   30.73    3.20
  -6   2   5   13.29    2.10
  -6   2   4   17.74    2.26
  -6   2   3    3.95    1.19
  -6   2   2    4.96    0.77
  -6   2   2    5.43    1.22
  -6   2   1  225.28    3.86
  -6   2   1  220.16    6.56
  -6   2   0  267.04    7.09
  -6   2  -1  113.35    4.55
  -6   2  -2   48.73    2.99
  -6   2  -3  126.37    4.87
   6  -2   3  117.51    2.74
  -6   2  -4    7.33    1.34
   6  -2   4    6.97    0.89
  -6   2  -5   72.73    3.73
   6  -2   5   72.99    2.79
  -6   2  -6    1.81    0.88
   6  -2   6    0.47    0.73
   6  -2   7   50.93    2.82
  -6   2  -7   55.99    3.51
   6  -2   8  108.91    4.44
   6  -2   9   10.80    1.65
  -6   2  -9   11.38    1.99
  -6   2 -10   18.63    2.36
   6  -2  10   15.40    2.09
  -6   1   8  158.99    7.73
  -6   1   7   72.77    4.10
  -6   1   7   75.38    4.98
  -6   1   6   17.91    2.05
  -6   1   6   19.75    2.51
  -6   1   5   30.54    2.49
  -6   1   5   36.84    3.12
  -6   1   4  230.33    6.17
  -6   1   4  223.11    7.25
  -6   1   3  393.53    7.46
  -6   1   3  373.79    8.71
  -6   1   2   32.28    2.50
  -6   1   1   43.93    2.76
  -6   1   0   35.12    1.56
  -6   1   0   38.98    2.57
  -6   1  -1  140.64    3.07
  -6   1  -1  150.50    4.88
  -6   1  -2  170.36    3.64
  -6   1  -2  201.53    5.62
  -6   1  -3    0.14    0.61
   6  -1   3    0.52    0.41
  -6   1  -4  124.79    4.59
   6  -1   4  116.36    3.31
  -6   1  -5   38.52    2.66
   6  -1   5   39.35    2.11
  -6   1  -6   97.98    4.29
   6  -1   6   86.96    3.36
   6  -1   7  217.87    5.81
  -6   1  -7  203.67    6.24
  -6   1  -8   -0.30    0.88
  -6   1  -8    0.80    0.82
   6  -1   8    0.78    0.87
   6  -1   9   28.32    2.47
  -6   1  -9   33.54    2.85
   6  -1  10    0.61    1.09
  -6   1 -11   56.43    4.07
   6  -1  11   50.73    3.69
  -6   0   8   60.43    4.07
  -6   0   8   62.59    4.77
  -6   0   7   19.56    2.39
  -6   0   7   19.64    2.66
  -6   0   6  157.09    6.10
  -6   0   6  150.62    6.34
  -6   0   5   55.27    3.46
  -6   0   5   45.33    3.29
  -6   0   4  320.19    7.64
  -6   0   4  305.92    8.00
  -6   0   3   41.88    2.83
   6   0  -2   90.24    2.30
  -6   0   2   88.35    2.06
  -6   0   1  131.01    4.38
  -6   0   1  123.06    2.87
  -6   0   0   23.63    1.85
  -6   0  -1   78.23    3.29
  -6   0  -2  206.81    5.30
  -6   0  -3   33.37    2.18
   6   0   3   37.38    1.82
  -6   0  -4   10.07    1.32
   6   0   4   10.58    1.10
  -6   0  -5  386.39    7.81
   6   0   5  380.71    6.67
  -6   0  -6  432.34    8.49
   6   0   6  424.82    7.52
   6   0   7  276.53    6.44
  -6   0  -7  295.23    7.32
   6   0   8   46.20    2.92
  -6   0  -8   55.73    3.08
  -6   0  -8   49.08    3.16
  -6   0  -9   46.74    3.25
   6   0   9   46.48    3.11
  -6   0  -9   45.74    2.61
  -6   0 -10   17.27    2.17
   6   0  10   19.30    2.29
  -6   0 -11   43.69    3.44
   6   0  11   43.26    3.44
  -6  -1   8   83.54    5.02
  -6  -1   8   89.66    5.46
  -6  -1   7   46.85    3.70
  -6  -1   7   43.70    3.61
  -6  -1   7   40.76    3.14
  -6  -1   6   41.15    3.21
  -6  -1   6   35.32    3.05
  -6  -1   5   13.77    1.95
  -6  -1   5   15.06    1.84
  -6  -1   4  627.25   10.68
  -6  -1   3    4.56    0.94
  -6  -1   2  238.86    5.63
  -6  -1   1  175.14    4.64
  -6  -1   0    0.11    0.44
  -6  -1  -1  143.27    4.06
  -6  -1  -2  422.59    7.01
  -6  -1  -3   77.95    3.15
   6   1   3   78.85    2.76
  -6  -1  -4    8.25    1.10
   6   1   4    9.30    1.07
  -6  -1  -5   87.66    3.53
  -6  -1  -5   94.24    4.04
   6   1   5   86.07    3.28
   6   1   6  293.95    6.41
  -6  -1  -6  283.95    6.60
   6   1   7  578.18    9.60
  -6  -1  -7  601.91    9.80
  -6  -1  -7  606.41   10.24
  -6  -1  -8  136.96    5.08
   6   1   8  124.96    4.69
  -6  -1  -8  142.04    4.62
  -6  -1  -9  142.45    5.41
   6   1   9  130.81    5.14
  -6  -1  -9  141.01    4.36
  -6  -1 -10   28.55    2.68
   6   1  10   36.08    2.97
  -6  -1 -11    5.20    1.53
   6   1  11    2.82    1.39
   6   1  12   34.49    3.25
  -6  -2   8  131.41    6.47
  -6  -2   7  215.05    7.91
  -6  -2   7  208.51    7.33
  -6  -2   7  219.53    6.82
  -6  -2   6   77.61    4.61
  -6  -2   6   69.79    3.97
  -6  -2   6   75.04    4.02
  -6  -2   5   65.01    4.05
  -6  -2   5   68.18    3.52
  -6  -2   5   61.34    3.56
  -6  -2   4  455.28    8.29
  -6  -2   4  453.17    9.46
  -6  -2   3   98.17    3.52
  -6  -2   3  101.39    4.46
  -6  -2   2  274.46    5.47
  -6  -2   2  273.17    7.21
  -6  -2   1   63.11    3.46
  -6  -2   0   56.55    3.25
  -6  -2  -2   32.28    1.83
  -6  -2  -2   30.12    2.39
  -6  -2  -3    3.06    1.01
   6   2   3    1.64    0.68
  -6  -2  -3    3.44    0.73
  -6  -2  -4    4.39    1.17
   6   2   4    3.90    0.86
  -6  -2  -4    4.98    0.89
   6   2   5   59.23    2.80
  -6  -2  -5   66.11    3.32
  -6  -2  -5   67.70    2.98
   6   2   6  156.10    4.78
  -6  -2  -6  162.82    5.14
  -6  -2  -6  162.17    4.86
  -6  -2  -7   35.51    2.40
  -6  -2  -7   31.66    2.25
  -6  -2  -8  457.07    9.03
   6   2   8  444.06    8.97
  -6  -2  -8  448.80    7.95
  -6  -2  -9   19.42    2.04
   6   2   9   17.51    2.04
  -6  -2  -9   17.73    1.60
  -6  -2 -10    6.39    1.40
   6   2  10    3.61    1.32
   6   2  11    3.22    1.49
   6   2  12   50.57    3.93
  -6  -3   8  182.32    7.88
  -6  -3   7  151.08    6.89
  -6  -3   7  141.14    5.23
  -6  -3   6   92.51    5.34
  -6  -3   6   91.51    4.27
  -6  -3   6  106.90    4.56
  -6  -3   5    8.62    1.27
  -6  -3   5    8.84    1.48
  -6  -3   4   84.86    4.07
  -6  -3   3   28.58    1.65
  -6  -3   3   25.97    1.10
  -6  -3   3   30.63    2.46
   6   3  -2   56.74    2.22
  -6  -3   2   59.45    2.17
  -6  -3   2   60.13    3.35
  -6  -3   1  134.36    4.90
  -6  -3   1  136.87    3.11
  -6  -3   0  387.02    5.16
   6   3   0  372.93    6.61
  -6  -3   0  385.06    8.26
  -6  -3  -1  876.82    7.92
   6   3   1  902.25    9.98
  -6  -3  -1  883.75   12.50
  -6  -3  -2  232.42    4.33
   6   3   2  229.39    5.02
  -6  -3  -2  236.44    6.43
  -6  -3  -3  315.48    7.34
  -6  -3  -3  315.48    5.31
  -6  -3  -4   92.59    3.95
   6   3   4   89.18    3.29
  -6  -3  -4   92.47    3.14
  -6  -3  -5   31.70    2.01
   6   3   5   35.11    2.23
  -6  -3  -5   32.96    2.39
  -6  -3  -6  291.01    6.20
   6   3   6  283.80    6.48
  -6  -3  -6  295.66    6.88
   6   3   7    4.62    1.13
  -6  -3  -7    4.40    1.00
  -6  -3  -7    3.07    0.86
  -6  -3  -8    0.06    0.72
  -6  -3  -8   -0.32    0.75
   6   3   8    0.46    0.81
   6   3   9   81.20    4.14
  -6  -3  -9   82.39    3.30
   6   3  10   82.48    4.37
  -6  -3 -10   86.50    3.22
   6   3  11   16.60    2.22
   6   3  12   39.28    3.46
  -6  -4   8  164.09    7.68
  -6  -4   7    4.84    1.77
  -6  -4   6  127.69    6.46
  -6  -4   6  137.59    5.07
  -6  -4   5    1.11    0.79
  -6  -4   4  168.81    3.66
  -6  -4   4  153.89    2.90
  -6  -4   4  160.64    5.43
   6   4  -3   14.31    1.22
  -6  -4   3   14.46    1.14
  -6  -4   3   14.07    0.92
  -6  -4   3   16.28    1.82
   6   4  -2    7.63    1.02
  -6  -4   2    8.98    1.38
  -6  -4   2    7.64    0.61
  -6  -4   1  923.68    5.86
  -6  -4   1  897.47   12.57
  -6  -4   0   73.06    1.70
  -6  -4   0   75.44    3.68
   6   4   1   25.30    1.44
  -6  -4  -1   22.46    2.07
  -6  -4  -1   23.18    1.11
  -6  -4  -2  752.57   11.33
  -6  -4  -2  758.93    6.96
  -6  -4  -3  381.49    5.43
  -6  -4  -3  366.75    7.81
   6   4   3  363.41    6.60
  -6  -4  -4  979.68    9.66
  -6  -4  -4  974.54   12.71
   6   4   4  960.87   11.09
  -6  -4  -5  227.19    5.04
   6   4   5  238.15    5.88
  -6  -4  -5  223.79    6.05
   6   4   6   46.31    2.75
  -6  -4  -6   41.65    2.35
  -6  -4  -6   42.85    2.66
   6   4   7   63.17    3.31
  -6  -4  -7   65.11    3.21
   6   4   8   11.84    1.69
  -6  -4  -8   14.37    1.55
  -6  -4  -9    2.96    0.82
   6   4   9    2.20    1.11
   6   4  10   29.78    2.76
  -6  -4 -10   23.82    1.89
   6   4  11  165.67    6.55
   6   4  12  107.00    5.54
  -6  -5   8    1.14    1.59
  -6  -5   7    3.72    1.76
  -6  -5   6    1.39    0.96
  -6  -5   5    5.36    1.20
  -6  -5   4   69.55    3.63
   6   5  -3  344.17    6.56
  -6  -5   3  348.98    6.01
  -6  -5   3  329.93    7.76
  -6  -5   2   -0.13    0.67
   6   5  -2    0.61    0.67
   6   5  -1  167.07    5.15
  -6  -5   1  170.28    5.51
  -6  -5   0  255.88    6.76
   6   5   1   39.41    1.27
  -6  -5  -1   41.24    2.73
   6   5   2   16.39    1.07
  -6  -5  -3  397.60    8.33
   6   5   3  385.09    7.09
  -6  -5  -4   74.39    3.59
   6   5   4   71.30    3.18
   6   5   5   80.56    3.52
  -6  -5  -5   82.74    3.80
   6   5   6 1684.18   16.28
  -6  -5  -6 1702.53   16.48
  -6  -5  -7  245.86    6.15
  -6  -5  -8   15.57    1.66
   6   5   9   18.17    2.09
  -6  -5  -9   17.88    1.74
   6   5  10   82.36    4.47
  -6  -5 -10   73.27    3.23
   6   5  11  355.04    9.36
   6   5  12   75.88    4.60
  -6  -6   7    4.98    1.97
  -6  -6   6   40.39    2.65
  -6  -6   5   65.48    3.43
  -6  -6   4  256.43    5.54
  -6  -6   4  243.43    6.60
  -6  -6   3   33.21    2.14
  -6  -6   3   30.61    2.47
   6   6  -2   43.44    2.72
  -6  -6   2   38.58    2.67
   6   6  -1   94.04    4.10
  -6  -6   1  100.93    4.31
   6   6   0   84.11    4.01
  -6  -6   0   84.74    4.00
  -6  -6  -1  759.16   11.77
  -6  -6  -2    3.22    1.02
   6   6   2    3.23    0.45
  -6  -6  -3  157.08    5.39
   6   6   3  171.10    3.57
  -6  -6  -4  137.88    4.99
   6   6   4  132.04    4.38
   6   6   5  472.33    8.56
  -6  -6  -5  439.01    8.66
   6   6   6    5.27    1.17
  -6  -6  -6    6.37    1.30
   6   6   7  726.37   11.43
  -6  -6  -7  712.09   10.81
   6   6   8  161.66    5.70
  -6  -6  -8  154.55    5.05
   6   6   9   14.82    1.91
  -6  -6  -9   10.82    1.42
   6   6  10   16.08    2.18
  -6  -6 -10   17.15    1.77
   6   6  11   86.32    4.76
  -6  -7   5   46.01    2.92
  -6  -7   4    7.87    1.30
  -6  -7   4    7.89    1.39
  -6  -7   3    5.28    1.27
  -6  -7   3    2.51    0.87
   6   7  -2    6.17    1.40
  -6  -7   2    6.92    1.33
  -6  -7   2    7.68    1.29
   6   7  -1   65.12    3.67
  -6  -7   1   62.63    3.48
   6   7   0  470.79   10.10
  -6  -7   0  450.13    9.16
  -6  -7  -1 1303.10   15.49
  -6  -7  -2  272.35    7.10
  -6  -7  -3  664.17   11.03
  -6  -7  -4  173.34    5.69
   6   7   5  125.41    4.48
  -6  -7  -5  127.07    4.87
   6   7   6   46.51    2.92
  -6  -7  -6   50.25    3.09
   6   7   7   55.26    3.31
  -6  -7  -7   56.87    3.22
   6   7   8   43.02    3.02
  -6  -7  -8   34.66    2.48
   6   7   9  268.19    7.86
  -6  -7  -9  257.86    6.70
   6   7  10   30.11    2.94
  -6  -7 -10   28.40    2.26
   6   7  11   56.50    3.98
  -6  -8   5   45.73    2.92
  -6  -8   4   12.92    1.69
  -6  -8   4   11.62    1.62
  -6  -8   3   99.29    4.25
  -6  -8   3  100.80    4.42
   6   8  -2   56.88    3.76
  -6  -8   2   53.39    3.31
   6   8  -1    9.87    1.67
  -6  -8   1    9.79    1.50
   6   8   0  134.69    5.78
  -6  -8   0  141.25    5.32
   6   8   1  320.30    9.37
  -6  -8  -1  319.24    7.95
   6   8   2   14.30    2.24
  -6  -8  -2   10.80    1.60
   6   8   4   54.06    2.84
  -6  -8  -4   56.70    3.46
   6   8   5  133.69    4.88
  -6  -8  -5  130.54    5.09
   6   8   6  248.36    6.82
  -6  -8  -6  239.54    6.73
   6   8   7  178.48    6.04
  -6  -8  -7  172.53    5.76
  -6  -8  -8    5.52    1.18
   6   8   8    8.04    1.74
   6   8   9    1.13    1.25
  -6  -8  -9   -0.14    0.75
   6   8  10    3.07    1.31
  -6  -8 -10    2.88    0.97
  -6  -9   4  168.32    5.81
  -6  -9   3  157.51    5.83
  -6  -9   3  157.66    5.58
  -6  -9   2   68.54    3.96
  -6  -9   2   65.52    3.62
   6   9  -1   44.09    3.48
  -6  -9   1   40.75    3.18
  -6  -9   1   36.14    2.74
   6   9   0   49.91    3.79
  -6  -9   0   45.20    3.12
   6   9   1   53.26    3.99
  -6  -9  -1   59.18    3.58
   6   9   2   10.50    1.92
  -6  -9  -2    9.69    1.61
   6   9   3  138.89    6.68
  -6  -9  -3  153.08    5.69
  -6  -9  -4   21.13    2.16
  -6  -9  -5  202.77    6.65
   6   9   6  188.37    6.80
   6   9   6  188.43    6.19
  -6  -9  -6  188.19    6.38
   6   9   7   92.50    4.47
  -6  -9  -7   87.07    4.24
   6   9   8    2.83    1.17
  -6  -9  -8   -0.68    1.00
   6   9   9   62.41    4.04
  -6  -9  -9   60.75    3.56
  -6 -10   2    4.71    1.42
  -6 -10   2    2.83    1.38
   6  10  -1   19.86    2.75
  -6 -10   1   21.07    2.42
  -6 -10   1   20.09    2.22
   6  10   0  189.00    7.67
  -6 -10   0  190.83    7.17
  -6 -10   0  196.11    6.66
  -6 -10  -1    5.08    1.33
   6  10   1    4.08    1.75
   6  10   2  134.51    6.76
  -6 -10  -2  138.59    5.70
   6  10   3   18.11    2.86
  -6 -10  -3   20.66    2.27
   6  10   4   41.29    4.10
  -6 -10  -4   46.48    3.30
  -6 -10  -5    2.14    1.15
   6  10   5   -0.11    1.44
  -6 -10  -6    3.77    1.33
  -6 -10  -7    0.86    1.05
   6  11   1   96.09    5.91
  -6 -11  -1   90.97    4.76
  -6 -11  -2    3.62    1.26
   6  11   2    6.43    2.29
  -6 -11  -3    1.10    1.04
   6  11   3   -1.65    1.89
  -6 -11  -4    6.37    1.67
   6  11   4    9.27    2.40
  -7   5   1   12.38    2.19
  -7   5   0    0.25    1.02
  -7   5  -1    0.36    0.92
  -7   5  -2   42.82    3.71
  -7   5  -3   12.31    2.06
  -7   5  -4   44.90    3.71
  -7   4   4    0.98    1.38
  -7   4   3   24.78    2.92
  -7   4   2   88.33    5.13
  -7   4   1  209.42    7.73
  -7   4   0  129.32    5.90
  -7   4  -1   -0.06    0.96
  -7   4  -2   37.81    3.20
  -7   4  -3   13.49    2.09
  -7   4  -4  120.25    5.60
  -7   4  -5    3.87    1.25
  -7   3   5    1.93    1.46
  -7   3   4    4.05    1.59
  -7   3   3    2.76    1.28
  -7   3   2  232.81    7.86
  -7   3   1  110.93    5.30
  -7   3   0  277.08    8.13
  -7   3  -1  207.04    6.95
  -7   3  -2  323.36    8.66
  -7   3  -3    9.50    1.62
  -7   3  -4   13.29    1.88
  -7   3  -5    4.56    1.40
  -7   3  -6   44.38    3.44
  -7   3  -7    0.64    1.09
  -7   2   6    7.90    2.04
  -7   2   5   62.98    4.41
  -7   2   4   30.51    3.05
  -7   2   3   28.00    2.74
  -7   2   2   39.64    3.11
  -7   2   1  269.27    7.71
  -7   2   0  232.24    7.03
  -7   2  -1   53.94    3.36
  -7   2  -2   68.48    3.85
  -7   2  -3  178.68    6.12
   7  -2   4    1.39    0.61
  -7   2  -4    2.22    0.94
  -7   2  -5   22.15    2.28
   7  -2   5   14.36    1.33
  -7   2  -6  139.07    5.57
   7  -2   6  131.96    4.12
  -7   2  -7    2.97    1.03
   7  -2   7    2.18    0.97
   7  -2   8   21.17    2.03
  -7   2  -8   21.36    2.35
   7  -2   9  172.13    5.78
  -7   2  -9  200.73    7.43
  -7   1   6   26.74    3.00
  -7   1   5   17.28    2.43
  -7   1   4   23.16    2.53
  -7   1   3   34.27    2.86
  -7   1   2    1.66    0.67
  -7   1   1   30.06    2.51
  -7   1   0    1.73    0.90
  -7   1  -1   70.77    3.62
  -7   1  -2   13.66    1.66
  -7   1  -3    4.68    1.07
  -7   1  -4  199.28    6.16
   7  -1   4  202.07    4.43
   7  -1   5    0.57    0.67
  -7   1  -5   -0.57    0.75
  -7   1  -6   59.53    3.52
   7  -1   6   60.56    2.90
  -7   1  -7   27.32    2.55
   7  -1   7   28.72    2.20
   7  -1   8  207.30    5.97
  -7   1  -8  213.50    6.76
  -7   1  -8  212.39    7.02
  -7   1  -9    1.55    1.08
   7  -1   9    1.52    1.18
  -7   1 -10  152.84    6.48
   7  -1  10  130.12    5.47
  -7   0   7  116.82    6.19
  -7   0   6   47.89    3.47
  -7   0   6   54.20    4.04
  -7   0   5   59.95    3.78
  -7   0   5   56.47    3.85
  -7   0   4   -0.06    0.79
  -7   0   4    0.94    0.93
  -7   0   3  505.68   10.00
  -7   0   2  109.40    4.44
  -7   0   1  201.71    5.86
  -7   0   0    2.20    0.79
  -7   0  -1   70.31    3.40
  -7   0  -2   90.40    3.85
  -7   0  -3  160.20    5.04
   7   0   3  150.51    3.83
  -7   0  -4  119.42    4.50
   7   0   4  122.66    3.64
  -7   0  -5  256.25    6.66
   7   0   5  255.67    5.61
  -7   0  -6   92.11    4.18
   7   0   6   91.01    3.63
   7   0   7  284.46    6.74
  -7   0  -7  283.58    7.76
  -7   0  -7  281.17    7.44
   7   0   8   80.75    3.88
  -7   0  -8   87.13    4.33
  -7   0  -8   92.70    4.58
   7   0   9   88.53    4.34
  -7   0  -9   91.97    4.17
  -7   0  -9   87.85    4.60
  -7   0 -10    3.16    1.12
   7   0  10    4.18    1.46
  -7  -1   7   27.62    2.94
  -7  -1   7   32.87    3.17
  -7  -1   7   31.48    3.09
  -7  -1   6    0.77    1.04
  -7  -1   6    3.09    1.19
  -7  -1   6    1.58    1.17
  -7  -1   5   20.86    2.49
  -7  -1   5   23.84    2.38
  -7  -1   4  121.14    4.87
  -7  -1   3  520.80    9.45
  -7  -1   2  385.61    7.68
  -7  -1   1   20.38    1.80
  -7  -1   0   74.88    3.25
  -7  -1  -1    0.06    0.47
  -7  -1  -2   18.90    1.68
  -7  -1  -3   48.24    2.70
   7   1   3   45.85    2.22
   7   1   4    6.04    0.98
  -7  -1  -4    8.49    1.25
  -7  -1  -5  142.07    4.79
  -7  -1  -5  151.72    5.69
   7   1   5  143.50    4.33
  -7  -1  -6  383.91    8.83
  -7  -1  -6  373.20    7.98
   7   1   6  373.06    7.50
   7   1   7    9.80    1.51
  -7  -1  -7    9.32    1.59
  -7  -1  -7    8.42    1.42
  -7  -1  -8    3.64    1.16
  -7  -1  -8    1.21    0.92
   7   1   8    1.72    1.09
  -7  -1  -9   10.52    1.76
   7   1   9    9.54    1.66
  -7  -1  -9   10.48    1.48
  -7  -1 -10    6.65    1.48
   7   1  10    6.03    1.51
  -7  -1 -11   43.33    3.56
   7   1  11   41.94    3.42
  -7  -2   7   62.84    4.65
  -7  -2   7   60.88    4.02
  -7  -2   6   13.86    2.41
  -7  -2   6   13.48    1.82
  -7  -2   6   14.22    2.02
  -7  -2   5    3.48    1.35
  -7  -2   5    1.93    0.84
  -7  -2   4  167.10    5.28
  -7  -2   4  174.33    6.46
  -7  -2   3  446.17    7.90
  -7  -2   3  446.61   10.22
  -7  -2   2  507.06   10.66
  -7  -2   2  531.61    8.32
  -7  -2   1  515.13   10.68
  -7  -2   1  528.33    7.87
  -7  -2   0  106.06    4.81
  -7  -2   0  101.51    3.47
  -7  -2  -1    2.79    0.84
  -7  -2  -2  107.82    3.65
  -7  -2  -2  114.11    4.98
  -7  -2  -3  711.41    9.49
  -7  -2  -3  724.22   12.31
   7   2   3  699.91    8.94
  -7  -2  -4   38.88    2.33
  -7  -2  -4   40.00    2.96
   7   2   4   35.66    2.18
  -7  -2  -5  207.71    6.47
  -7  -2  -5  188.66    5.26
   7   2   5  197.94    5.37
  -7  -2  -6  236.91    6.92
   7   2   6  234.45    6.12
  -7  -2  -6  223.54    6.03
   7   2   7  420.53    8.53
  -7  -2  -7  437.66    9.03
  -7  -2  -7  422.43    8.68
   7   2   8    1.39    0.94
  -7  -2  -8    1.50    1.06
  -7  -2  -8    0.62    0.84
   7   2   9   81.10    4.22
  -7  -2  -9   84.16    3.78
  -7  -2 -10   14.24    2.03
   7   2  10   14.33    2.07
  -7  -2 -11    5.54    1.51
   7   2  11    2.61    1.40
  -7  -3   7  243.55    9.28
  -7  -3   6   30.57    3.42
  -7  -3   6   29.45    2.74
  -7  -3   5   14.91    2.11
  -7  -3   4    6.27    1.51
  -7  -3   4    5.91    1.01
  -7  -3   3  128.99    3.74
  -7  -3   3  129.16    5.38
   7   3  -2   61.59    2.29
  -7  -3   2   70.01    3.92
  -7  -3   1  232.02    7.07
  -7  -3   0  552.49   10.84
  -7  -3  -1   16.40    1.31
  -7  -3  -1   16.80    2.10
  -7  -3  -2  219.49    4.64
  -7  -3  -2  214.86    6.67
  -7  -3  -3  936.34   10.06
  -7  -3  -3  916.45   13.74
   7   3   3  898.70   10.59
  -7  -3  -4  100.07    4.53
  -7  -3  -4   99.79    3.48
   7   3   4  101.16    3.70
   7   3   5    2.57    0.86
  -7  -3  -5    2.95    1.06
  -7  -3  -5    2.00    0.69
  -7  -3  -6  201.75    5.54
   7   3   6  196.94    5.64
  -7  -3  -6  209.19    6.31
  -7  -3  -7   34.30    2.44
   7   3   7   27.52    2.35
  -7  -3  -7   33.43    2.61
  -7  -3  -8  183.90    5.87
   7   3   8  180.02    5.94
  -7  -3  -8  173.85    5.58
  -7  -3  -9  186.79    6.31
   7   3   9  190.99    6.37
  -7  -3  -9  200.35    5.73
   7   3  10   18.71    2.36
   7   3  11   68.12    4.26
  -7  -4   7  308.17   10.72
  -7  -4   6    8.48    1.62
  -7  -4   6    7.99    2.08
  -7  -4   5    4.18    1.23
  -7  -4   4    9.89    1.60
  -7  -4   3   43.41    3.11
   7   4  -2   33.39    1.96
  -7  -4   2   35.25    2.83
  -7  -4   2   33.79    1.46
  -7  -4   1   88.17    2.29
  -7  -4   1   88.10    4.32
  -7  -4   0  142.15    2.98
  -7  -4   0  135.06    5.30
   7   4   1 1302.23   12.64
  -7  -4  -1 1290.84    9.34
  -7  -4  -1 1292.56   16.29
  -7  -4  -2    1.52    0.93
  -7  -4  -2   -0.04    0.40
  -7  -4  -3  834.79   13.04
  -7  -4  -3  851.33    8.89
  -7  -4  -4 1238.82   11.39
  -7  -4  -4 1217.51   15.39
  -7  -4  -5  138.12    4.14
  -7  -4  -5  134.85    5.20
   7   4   5  136.37    4.63
  -7  -4  -6   42.59    2.52
   7   4   6   40.52    2.73
  -7  -4  -6   42.51    2.88
  -7  -4  -7   90.82    3.92
   7   4   7   85.72    4.05
  -7  -4  -7   94.59    4.18
   7   4   8   92.51    4.33
  -7  -4  -8   90.74    4.08
   7   4   9   47.81    3.32
  -7  -4  -9   42.27    2.71
   7   4  10   29.08    2.86
  -7  -4 -10   30.75    2.27
   7   4  11   38.14    3.39
  -7  -5   7   63.62    5.41
  -7  -5   6   81.04    4.22
  -7  -5   5   93.65    4.56
  -7  -5   4    5.26    1.27
  -7  -5   3  163.42    5.95
   7   5  -2   20.07    1.77
  -7  -5   2   25.30    2.46
  -7  -5   1    1.20    0.91
   7   5  -1    0.63    0.77
  -7  -5   0  134.30    5.34
  -7  -5  -1   48.48    1.42
  -7  -5  -1   54.78    3.42
  -7  -5  -2  810.61    6.95
  -7  -5  -3 2143.31   12.94
  -7  -5  -3 2161.26   20.85
  -7  -5  -4  180.55    6.02
   7   5   4  166.88    4.97
  -7  -5  -5  890.15   13.29
   7   5   5  840.57   11.54
   7   5   6  114.35    4.51
  -7  -5  -6  115.50    4.71
   7   5   7  200.98    6.21
  -7  -5  -7  200.09    6.13
   7   5   8   25.98    2.55
  -7  -5  -8   24.01    2.16
   7   5   9   12.19    1.87
  -7  -5  -9   15.70    1.80
   7   5  10   13.66    2.03
  -7  -5 -10   12.52    1.62
   7   5  11   77.41    4.71
  -7  -6   6   53.22    3.40
  -7  -6   5    0.09    0.88
  -7  -6   4   76.36    4.05
  -7  -6   3  577.53    8.62
  -7  -6   3  594.32   11.18
   7   6  -2  718.10   10.69
  -7  -6   2  705.44   12.20
  -7  -6   1    3.82    1.19
   7   6  -1    5.72    1.31
  -7  -6   0  103.02    4.73
  -7  -6  -1    0.41    0.80
  -7  -6  -2  861.38   13.23
  -7  -6  -3   87.21    4.31
  -7  -6  -4   64.18    3.67
   7   6   4   62.84    3.22
  -7  -6  -5   53.01    3.31
   7   6   5   52.36    3.01
   7   6   6  233.35    6.57
  -7  -6  -6  233.39    6.80
  -7  -6  -7  106.57    4.46
  -7  -6  -8  242.38    6.74
   7   6   9   27.47    2.71
  -7  -6  -9   25.70    2.22
   7   6  10   40.95    3.39
  -7  -6 -10   38.67    2.67
   7   6  11   35.18    3.24
  -7  -7   5    5.12    1.31
  -7  -7   4   10.32    1.57
  -7  -7   3  103.19    4.02
  -7  -7   3   97.34    4.62
   7   7  -2   95.75    4.40
  -7  -7   2   95.55    4.55
   7   7  -1  263.81    7.55
  -7  -7   1  262.49    7.63
   7   7   0   23.55    2.42
  -7  -7   0   23.08    2.39
  -7  -7  -1   38.36    2.98
  -7  -7  -2  633.81   11.63
  -7  -7  -3    1.69    0.90
  -7  -7  -4    8.09    1.56
   7   7   5    5.75    1.16
  -7  -7  -5    2.87    0.86
   7   7   6   31.03    2.49
  -7  -7  -6   33.15    2.64
   7   7   7  113.13    4.87
  -7  -7  -7  104.51    4.66
   7   7   8    0.47    1.09
  -7  -7  -8    1.37    0.94
   7   7   9   21.54    2.45
  -7  -7  -9   22.67    2.14
   7   7  10   29.62    3.02
  -7  -7 -10   22.74    2.22
  -7  -8   4    1.33    0.90
  -7  -8   3    0.45    0.84
  -7  -8   3    0.37    0.91
  -7  -8   2    3.18    1.17
   7   8  -2    2.02    1.21
  -7  -8   2    2.43    1.09
   7   8  -1  245.72    7.58
  -7  -8   1  228.56    7.05
   7   8   0  307.20    8.84
  -7  -8   0  311.58    8.24
   7   8   1   90.57    5.09
  -7  -8  -1   81.45    4.24
  -7  -8  -2  198.11    6.62
  -7  -8  -4  119.87    5.15
  -7  -8  -5   39.04    2.96
   7   8   6  167.02    5.75
  -7  -8  -6  165.36    6.05
   7   8   7   76.21    4.04
  -7  -8  -7   75.02    4.01
   7   8   8  326.89    8.85
  -7  -8  -8  306.34    7.93
   7   8   9    2.89    1.40
  -7  -8  -9   -0.50    1.00
  -7  -9   3    3.91    1.16
  -7  -9   3    3.37    1.27
   7   9  -2  201.36    7.46
  -7  -9   2  183.53    6.42
  -7  -9   2  182.81    6.52
  -7  -9   1    2.70    1.25
   7   9  -1    0.95    1.14
   7   9   0   36.82    3.41
  -7  -9   0   32.03    2.84
  -7  -9  -1    3.02    1.06
   7   9   1    3.64    1.49
   7   9   2  282.60    9.65
  -7  -9  -2  286.09    8.17
   7   9   3    9.59    2.03
  -7  -9  -3    9.62    1.61
  -7  -9  -4    2.27    1.27
  -7  -9  -5   52.31    3.55
  -7  -9  -6  172.89    6.24
   7   9   7   -0.50    0.92
  -7  -9  -7    0.21    0.96
  -7  -9  -8    9.71    1.69
   7   9   8   10.43    1.84
  -7 -10   1    1.54    1.15
  -7 -10   1   -0.02    1.19
   7  10   0   23.24    2.89
  -7 -10   0   23.19    2.42
  -7 -10  -1    1.54    1.02
   7  10   1    2.56    1.62
  -7 -10  -2    2.86    1.21
   7  10   2   -1.86    1.77
   7  10   3  119.52    6.86
  -7 -10  -3  123.02    5.50
   7  10   4   18.98    3.12
  -7 -10  -4   10.71    1.91
  -7 -10  -5   -0.79    0.99
  -7 -10  -6    1.06    1.23
  -7 -10  -7    6.61    1.69
  -8   4  -1   30.58    3.22
  -8   4  -2   17.96    2.52
  -8   4  -3   42.80    3.56
  -8   3   2  196.28    7.69
  -8   3   1  121.45    5.91
  -8   3   0  122.55    5.77
  -8   3  -1   28.57    2.86
  -8   3  -2    9.99    1.88
  -8   3  -3   16.90    2.27
  -8   3  -4   18.14    2.23
  -8   3  -5   36.27    3.20
  -8   3  -6  171.37    6.93
  -8   2   4   14.83    2.54
  -8   2   3   39.23    3.39
  -8   2   2   10.15    1.85
  -8   2   1   34.72    3.04
  -8   2   0    1.52    0.92
  -8   2  -1   83.71    4.50
  -8   2  -2   44.69    3.31
  -8   2  -3   51.45    3.50
  -8   2  -4    5.05    1.43
  -8   2  -5   64.05    3.99
  -8   2  -6  239.16    7.76
  -8   2  -7   26.06    2.68
  -8   1   5   83.09    5.05
  -8   1   4    9.74    1.86
  -8   1   3   13.68    1.98
  -8   1   2   27.89    2.64
  -8   1   1  230.67    7.13
  -8   1   0  503.85   10.30
  -8   1  -1   -0.06    0.74
  -8   1  -2   51.08    3.24
  -8   1  -3   61.78    3.60
  -8   1  -4  255.00    7.45
   8  -1   5    2.42    0.84
  -8   1  -5    4.17    1.47
  -8   1  -6   51.57    3.51
   8  -1   6   50.39    2.74
  -8   1  -7  202.05    7.01
   8  -1   7  202.66    5.80
  -8   1  -8    7.80    1.71
   8  -1   8    4.08    1.28
  -8   1  -8    5.82    1.50
   8  -1   9  391.92    9.01
  -8   1  -9  428.76   10.97
  -8   0   5    0.89    1.02
  -8   0   4   27.91    2.69
  -8   0   3  104.77    4.84
  -8   0   2    5.20    1.21
  -8   0   1  347.89    8.22
  -8   0   0    1.17    0.95
  -8   0  -1  212.47    6.29
  -8   0  -2   58.70    3.34
  -8   0  -3  112.29    4.53
  -8   0  -4  282.69    7.35
   8   0   4  289.42    5.81
  -8   0  -5   13.98    1.86
   8   0   5   12.34    1.37
   8   0   6    7.33    1.26
  -8   0  -6    8.81    1.55
  -8   0  -6   11.56    1.97
  -8   0  -7   56.61    3.59
   8   0   7   57.64    3.21
   8   0   8   71.06    3.76
  -8   0  -8   81.97    4.51
  -8   0  -8   75.05    4.29
   8   0   9   21.38    2.36
  -8   0  -9   24.65    2.62
  -8  -1   6  359.18   10.68
  -8  -1   5   -1.73    1.36
  -8  -1   5    0.21    0.98
  -8  -1   5    0.65    1.40
  -8  -1   4  275.82    8.43
  -8  -1   4  258.21    7.38
  -8  -1   3   12.73    1.67
  -8  -1   2  399.81    8.47
  -8  -1   1   39.94    2.64
  -8  -1   0  231.77    6.14
  -8  -1  -1   22.24    1.99
  -8  -1  -2   79.86    3.62
  -8  -1  -3  519.03    9.30
  -8  -1  -4  177.06    5.56
  -8  -1  -4  171.45    6.58
   8   1   4  166.00    4.57
  -8  -1  -5  331.76    7.83
  -8  -1  -5  350.93    9.39
   8   1   5  349.71    7.01
  -8  -1  -6   11.01    1.53
  -8  -1  -6   16.78    2.27
   8   1   6   15.54    1.69
  -8  -1  -7   18.78    2.26
   8   1   7   18.26    1.96
  -8  -1  -7   20.16    2.17
   8   1   8  143.83    5.36
  -8  -1  -8  147.13    5.86
  -8  -1  -8  143.45    5.79
   8   1   9    8.48    1.65
  -8  -1  -9   10.93    1.89
  -8  -1  -9   11.77    1.83
  -8  -1 -10   24.69    2.78
   8   1  10   25.08    2.76
  -8  -2   6   22.18    2.86
  -8  -2   6   21.23    2.70
  -8  -2   5    0.79    1.16
  -8  -2   5    1.57    1.52
  -8  -2   4   11.08    1.56
  -8  -2   4   12.74    2.12
  -8  -2   3   60.64    4.13
  -8  -2   3   58.36    3.17
  -8  -2   2  743.96   14.12
  -8  -2   2  716.42   10.31
  -8  -2   1    0.98    0.99
  -8  -2   1    0.88    0.58
  -8  -2   0  247.32    7.92
  -8  -2   0  247.82    5.87
  -8  -2  -1  265.25    6.11
  -8  -2  -1  278.78    8.41
  -8  -2  -2  104.53    3.93
  -8  -2  -2  116.82    5.37
  -8  -2  -3  207.41    5.64
  -8  -2  -3  197.67    7.04
  -8  -2  -4    6.63    1.49
   8   2   4    5.54    1.11
  -8  -2  -4    4.96    1.13
  -8  -2  -5   -0.08    1.00
   8   2   5    0.68    0.68
  -8  -2  -5   -0.22    0.71
  -8  -2  -6   14.74    1.97
   8   2   6   11.32    1.48
  -8  -2  -6   16.14    1.83
  -8  -2  -7   95.88    4.77
   8   2   7   96.55    4.27
  -8  -2  -7  104.23    4.60
  -8  -2  -8   19.60    2.14
   8   2   8   20.29    2.34
  -8  -2  -8   24.63    2.62
   8   2   9    1.23    1.13
  -8  -2  -9    1.88    1.16
  -8  -2  -9    1.08    0.84
  -8  -2 -10   20.76    2.40
   8   2  10   19.80    2.53
  -8  -3   6  358.25   11.41
  -8  -3   6  337.29    9.86
  -8  -3   5   23.93    2.76
  -8  -3   4    0.04    1.10
  -8  -3   3   23.28    2.58
  -8  -3   2   51.37    3.67
  -8  -3   2   45.98    2.40
  -8  -3   1  424.98   10.36
  -8  -3   1  419.75    6.91
  -8  -3   0    8.06    1.63
  -8  -3   0    7.67    1.02
  -8  -3  -1  191.87    4.76
  -8  -3  -1  195.28    6.94
  -8  -3  -2  506.77    7.86
  -8  -3  -2  494.68   10.90
  -8  -3  -3    1.02    1.24
  -8  -3  -3    0.33    0.47
  -8  -3  -4   16.35    1.58
   8   3   4   13.93    1.58
  -8  -3  -5   44.39    3.29
   8   3   5   50.97    2.92
  -8  -3  -5   51.06    2.89
  -8  -3  -6    4.03    1.23
   8   3   6    3.14    0.94
  -8  -3  -6    5.01    1.13
  -8  -3  -7   54.01    3.13
  -8  -3  -7   52.85    3.47
   8   3   7   48.22    3.08
  -8  -3  -8  188.39    6.11
   8   3   8  193.72    6.38
  -8  -3  -8  190.33    6.45
  -8  -3  -9   17.00    2.05
   8   3   9   17.31    2.21
  -8  -3  -9   17.32    2.10
   8   3  10    1.96    1.22
  -8  -3 -10    0.36    0.91
  -8  -4   6  349.64   11.57
  -8  -4   6  323.88    9.26
  -8  -4   5   83.84    4.80
  -8  -4   4   22.59    2.51
  -8  -4   3    1.23    0.99
  -8  -4   2  304.69    8.73
  -8  -4   1    3.16    1.16
  -8  -4   0  479.66    6.41
  -8  -4   0  465.91   10.66
  -8  -4  -1 1488.65   11.58
  -8  -4  -1 1481.15   18.73
  -8  -4  -2   92.37    3.02
  -8  -4  -2   88.23    4.58
  -8  -4  -3  112.37    5.15
  -8  -4  -3  124.15    3.71
  -8  -4  -4    5.49    1.53
   8   4   4    3.62    1.09
  -8  -4  -4    3.52    0.84
  -8  -4  -5    7.23    1.41
  -8  -4  -5   10.11    1.31
   8   4   5    9.11    1.43
   8   4   6   -0.01    0.93
  -8  -4  -6    1.14    0.82
  -8  -4  -6   -0.19    0.62
  -8  -4  -7   67.66    3.45
   8   4   7   65.44    3.64
  -8  -4  -7   73.82    4.11
   8   4   8    1.90    1.34
  -8  -4  -8    2.61    1.24
  -8  -4  -8    0.10    0.78
   8   4   9   54.43    3.80
  -8  -4  -9   57.43    3.51
   8   4  10   48.11    3.65
  -8  -4 -10   45.05    3.00
  -8  -5   5  114.80    5.50
  -8  -5   4   29.99    2.90
  -8  -5   3   93.82    4.83
  -8  -5   2    0.25    0.89
   8   5  -1  414.92    8.18
  -8  -5   1  468.61   10.62
  -8  -5   0    1.42    1.05
  -8  -5  -1   -1.74    1.06
  -8  -5  -2  663.27    6.96
  -8  -5  -3    9.78    1.02
  -8  -5  -3   10.97    1.85
  -8  -5  -4  155.92    4.14
  -8  -5  -4  160.33    6.16
  -8  -5  -5   51.63    2.63
  -8  -5  -5   50.47    3.43
   8   5   5   47.37    2.97
  -8  -5  -6   47.60    2.70
  -8  -5  -6   49.73    3.49
   8   5   6   51.00    3.18
   8   5   7    4.46    1.30
  -8  -5  -7    7.29    1.52
   8   5   8    0.08    0.97
  -8  -5  -8    0.13    0.93
   8   5   9    0.59    1.09
  -8  -5  -9    1.05    0.96
   8   5  10   14.46    2.32
  -8  -5 -10   16.05    1.92
  -8  -6   5   21.16    2.44
  -8  -6   4    9.32    1.73
  -8  -6   3  101.59    5.17
  -8  -6   2   14.57    2.08
   8   6  -1   15.83    1.90
  -8  -6   1   16.61    2.19
  -8  -6   0    2.34    1.05
  -8  -6  -1    1.37    0.89
  -8  -6  -2  146.31    5.99
  -8  -6  -3  186.30    6.76
  -8  -6  -4   29.45    2.72
  -8  -6  -5    2.29    1.10
   8   6   5    1.99    1.04
  -8  -6  -6   12.92    1.92
   8   6   6   10.68    1.62
   8   6   7   83.36    4.31
  -8  -6  -7   82.74    4.31
   8   6   8    7.46    1.64
  -8  -6  -8    6.91    1.42
   8   6   9   21.98    2.57
  -8  -6  -9   24.01    2.40
   8   6  10  111.79    5.65
  -8  -6 -10  100.54    4.58
  -8  -7   4   56.35    3.81
  -8  -7   3   -0.35    1.06
  -8  -7   2    5.20    1.37
  -8  -7   1    4.36    1.30
   8   7  -1    1.95    1.03
   8   7   0  112.01    5.23
  -8  -7   0  122.20    5.53
  -8  -7  -1   42.13    3.24
  -8  -7  -2    0.65    0.86
  -8  -7  -3  540.99   11.34
  -8  -7  -4    2.95    1.24
  -8  -7  -5  213.14    7.08
  -8  -7  -6  104.35    4.98
   8   7   6  108.33    4.82
  -8  -7  -7   36.25    2.95
  -8  -7  -8    4.97    1.37
   8   7   9   96.50    5.01
  -8  -7  -9   86.95    4.42
  -8  -8   3    0.42    0.89
  -8  -8   2    4.90    1.35
   8   8  -1   41.16    3.27
  -8  -8   1   44.05    3.36
   8   8   0   36.98    3.33
  -8  -8   0   39.13    3.22
  -8  -8  -1   -0.57    1.04
   8   8   1    1.12    1.31
  -8  -8  -2   92.30    4.83
  -8  -8  -4   72.49    4.20
  -8  -8  -5    9.02    1.75
  -8  -8  -6  122.60    5.51
   8   8   7   88.17    4.54
  -8  -8  -7   81.81    4.49
   8   8   8  249.16    7.96
  -8  -8  -8  231.28    7.35
   8   8   9  108.82    5.54
  -8  -8  -9  107.18    4.94
  -8  -9   2   17.50    2.31
   8   9  -1  255.28    8.43
  -8  -9   1  257.73    8.18
  -8  -9   0   -0.17    1.13
   8   9   0    2.29    1.60
   8   9   1   18.30    2.73
  -8  -9  -1   10.96    1.95
   8   9   2   11.42    2.30
  -8  -9  -2   14.02    2.06
  -8  -9  -3   43.38    3.39
  -8  -9  -4   16.64    2.30
  -8  -9  -5   -0.69    1.13
  -8  -9  -6    2.70    1.52
   8   9   7   42.40    3.37
  -8  -9  -7   45.44    3.46
  -8 -10  -1   10.82    1.88
   8  10   1   13.20    2.33
   8  10   2  355.39   11.72
  -8 -10  -2  331.09    9.44
   8  10   3    9.83    2.48
  -8 -10  -3   10.51    1.96
   8  10   4   14.88    2.72
  -8 -10  -4   17.86    2.38
  -8 -10  -5   68.33    4.21
  -9   2   0    5.03    1.44
  -9   2  -1  105.05    5.40
  -9   2  -2   96.18    5.13
  -9   2  -3   18.37    2.31
  -9   2  -4   17.33    2.29
  -9   1   2    6.24    1.59
  -9   1   1   36.95    3.15
  -9   1   0    8.77    1.72
  -9   1  -1   32.44    2.91
  -9   1  -2    2.69    1.12
  -9   1  -3    9.94    1.72
  -9   1  -4   22.03    2.43
  -9   1  -5   -0.17    1.02
  -9   1  -6   22.07    2.55
  -9   0   3   54.37    3.73
  -9   0   2   73.83    4.19
  -9   0   1  214.99    6.91
  -9   0   0  533.05   10.70
  -9   0  -1    0.58    0.85
  -9   0  -2   97.54    4.56
  -9   0  -3  133.23    5.26
  -9   0  -4   22.04    2.27
  -9   0  -5   27.37    2.58
  -9   0  -6    4.75    1.65
  -9   0  -6    7.48    1.61
  -9   0  -7   11.78    2.19
   9   0   7    9.07    1.59
  -9   0  -7    9.92    1.70
  -9   0  -8    2.32    1.64
   9   0   8    0.61    0.96
  -9   0  -8    1.22    1.15
  -9  -1   4   28.34    3.32
  -9  -1   3   40.76    3.02
  -9  -1   2   72.58    3.87
  -9  -1   1  178.52    5.88
  -9  -1   0  242.40    6.86
  -9  -1  -1    8.51    1.43
  -9  -1  -2   29.92    2.40
  -9  -1  -3   19.89    2.10
  -9  -1  -3   25.45    2.90
  -9  -1  -4  226.50    6.68
  -9  -1  -4  212.49    7.92
  -9  -1  -5   65.14    3.71
  -9  -1  -5   66.54    4.52
   9   1   5   61.99    3.08
   9   1   6    2.79    1.04
  -9  -1  -6    2.17    1.01
  -9  -1  -7   94.85    5.26
  -9  -1  -7   94.82    4.77
   9   1   7   96.79    4.41
   9   1   8   -0.20    0.96
  -9  -1  -8    1.62    1.48
  -9  -1  -8   -0.04    0.87
  -9  -2   4  166.68    7.46
  -9  -2   3  157.03    7.13
  -9  -2   2   48.97    3.97
  -9  -2   2   40.84    2.71
  -9  -2   1  219.74    8.17
  -9  -2   1  226.70    6.12
  -9  -2   0   34.59    3.29
  -9  -2   0   34.66    2.46
  -9  -2  -1   62.31    3.19
  -9  -2  -1   59.76    4.17
  -9  -2  -2   11.99    2.00
  -9  -2  -2   17.38    1.84
  -9  -2  -3    7.91    1.87
  -9  -2  -3   10.56    1.49
  -9  -2  -4   31.81    2.45
  -9  -2  -4   27.40    2.88
  -9  -2  -5    8.45    1.35
  -9  -2  -5   11.98    2.09
   9   2   5   11.20    1.50
  -9  -2  -6    8.06    1.63
   9   2   6    6.63    1.31
  -9  -2  -6    7.25    1.41
  -9  -2  -7  121.23    5.80
   9   2   7  127.54    5.12
  -9  -2  -7  126.31    5.35
  -9  -2  -8  116.03    5.56
   9   2   8  114.49    5.13
  -9  -2  -8  109.98    5.08
   9   2   9    9.16    1.85
  -9  -2  -9    8.99    1.85
  -9  -2  -9   13.07    1.96
  -9  -3   4  286.40    9.56
  -9  -3   3    0.16    1.15
  -9  -3   2  413.90   11.21
  -9  -3   1  306.21    9.45
  -9  -3   0    4.83    1.56
  -9  -3   0    5.92    1.05
  -9  -3  -1   16.89    1.62
  -9  -3  -1   19.32    2.44
  -9  -3  -2   19.51    1.78
  -9  -3  -2   21.50    2.58
  -9  -3  -3    4.72    1.40
  -9  -3  -3    5.43    1.11
  -9  -3  -4    5.83    1.62
  -9  -3  -4    4.87    1.01
  -9  -3  -5  131.38    6.05
  -9  -3  -5  130.12    4.78
   9   3   5  123.12    4.65
  -9  -3  -6    1.01    1.14
   9   3   6    2.79    1.09
  -9  -3  -6    0.24    0.65
  -9  -3  -7   13.41    1.78
  -9  -3  -7   15.50    2.24
   9   3   7   14.49    1.98
  -9  -3  -8   58.45    3.66
  -9  -3  -8   57.71    3.89
   9   3   8   62.19    3.90
  -9  -3  -9   34.43    3.05
   9   3   9   34.66    3.08
  -9  -3  -9   33.09    3.06
  -9  -4   4   -0.26    1.14
  -9  -4   3   89.46    5.22
  -9  -4   2   46.51    3.84
  -9  -4   1  515.74   12.26
  -9  -4   0   48.59    3.85
  -9  -4  -1   71.62    4.50
  -9  -4  -2    9.15    1.87
  -9  -4  -2    7.78    1.05
  -9  -4  -3   33.82    3.18
  -9  -4  -3   32.71    2.11
  -9  -4  -4   72.83    4.44
  -9  -4  -4   73.88    3.33
  -9  -4  -5   34.32    3.11
   9   4   5   36.14    2.64
  -9  -4  -5   35.99    2.48
  -9  -4  -6   59.04    3.21
  -9  -4  -6   56.06    3.85
   9   4   6   55.44    3.31
  -9  -4  -7  167.70    5.71
  -9  -4  -7  158.85    6.48
   9   4   7  166.18    6.06
   9   4   8    3.66    1.24
  -9  -4  -8    4.51    1.46
  -9  -4  -8    2.79    1.14
  -9  -4  -9   16.84    2.16
   9   4   9   17.62    2.34
  -9  -4  -9   16.13    2.14
  -9  -5   4    0.03    1.19
  -9  -5   3   59.87    4.25
  -9  -5   2    6.59    1.65
  -9  -5   1  160.31    6.70
  -9  -5   0    7.77    1.76
  -9  -5  -1  114.17    5.54
  -9  -5  -2    9.43    1.87
  -9  -5  -3  180.13    6.93
  -9  -5  -4   22.24    1.71
  -9  -5  -4   28.12    2.95
  -9  -5  -5  401.41    7.58
  -9  -5  -5  404.75   10.42
  -9  -5  -6   46.70    2.83
  -9  -5  -6   48.70    3.67
   9   5   6   39.63    3.00
  -9  -5  -7    1.07    0.78
   9   5   7   -0.50    0.96
  -9  -5  -7    1.00    1.01
   9   5   8   49.57    3.67
  -9  -5  -8   41.43    3.30
   9   5   9    6.78    1.77
  -9  -5  -9    7.38    1.66
  -9  -6   3   75.60    4.76
  -9  -6   2    0.83    1.33
  -9  -6   1  113.35    5.70
  -9  -6   0  209.87    7.70
  -9  -6  -1    8.25    1.75
  -9  -6  -2   34.43    3.12
  -9  -6  -3   15.34    2.28
  -9  -6  -4  286.50    8.79
  -9  -6  -5    6.50    1.71
  -9  -6  -6   10.21    1.87
   9   6   6   13.04    1.82
  -9  -6  -7   20.94    2.49
   9   6   7   21.49    2.50
   9   6   8    2.40    1.40
  -9  -6  -8    0.54    1.12
   9   6   9  149.77    6.51
  -9  -6  -9  134.64    5.74
  -9  -7   2    3.62    1.40
  -9  -7   1    2.94    1.31
   9   7   0   42.66    3.40
  -9  -7   0   41.80    3.51
  -9  -7  -1   44.16    3.66
  -9  -7  -2    3.46    1.41
  -9  -7  -3  146.65    6.36
  -9  -7  -4  202.32    7.40
  -9  -7  -5   10.41    1.98
  -9  -7  -6   47.35    3.65
  -9  -7  -7   20.60    2.49
   9   7   7   16.74    2.21
   9   7   8    0.57    1.14
  -9  -7  -8    0.43    1.10
  -9  -8   1    1.36    1.15
   9   8   0   54.68    3.98
  -9  -8   0   54.83    4.03
   9   8   1   50.46    4.02
  -9  -8  -1   59.60    4.23
  -9  -8  -2    0.06    1.16
  -9  -8  -4   12.46    2.17
  -9  -8  -5  327.98    9.41
  -9  -8  -6   14.15    2.13
   9   8   7    3.96    1.51
  -9  -8  -7    3.93    1.54
  -9  -9  -1    1.71    1.21
   9   9   1    3.59    1.70
  -9  -9  -2    5.17    1.50
   9   9   2    7.65    1.89
  -9  -9  -3    1.12    1.25
  -9  -9  -4   -0.04    1.28
  -9  -9  -5   38.73    3.47
 -10   0  -1  212.60    7.19
 -10   0  -2   -1.26    1.05
 -10   0  -3   18.76    2.31
 -10   0  -4   28.34    2.82
 -10  -1   0  163.96    7.73
 -10  -1   0  156.21    5.90
 -10  -1  -1   19.67    2.11
 -10  -1  -2   35.87    2.90
 -10  -1  -2   48.87    4.30
 -10  -1  -3   11.86    2.36
 -10  -1  -3    8.43    1.54
 -10  -1  -4   14.60    1.96
 -10  -1  -4   17.02    2.63
 -10  -1  -5   11.80    2.35
 -10  -1  -5   11.63    1.85
 -10  -1  -6   73.22    4.26
 -10  -1  -6   82.84    5.39
 -10  -2   1   16.14    2.67
 -10  -2   0    6.27    1.86
 -10  -2  -1    4.96    1.80
 -10  -2  -1    4.50    1.22
 -10  -2  -2   25.62    2.31
 -10  -2  -2   21.70    3.08
 -10  -2  -3    8.88    2.32
 -10  -2  -3    8.53    1.55
 -10  -2  -4    9.26    2.10
 -10  -2  -4    9.12    1.58
 -10  -2  -5   75.55    4.07
 -10  -2  -5   75.73    5.01
 -10  -2  -6   36.18    2.95
  10   2   6   39.00    2.80
 -10  -2  -7   57.89    4.38
  10   2   7   56.66    3.54
 -10  -2  -7   55.63    3.78
 -10  -3   2   36.53    3.76
 -10  -3   1   73.13    5.07
 -10  -3   0   18.05    2.58
 -10  -3  -1   21.79    2.76
 -10  -3  -2  120.59    6.24
 -10  -3  -3   -1.46    1.54
 -10  -3  -3   -0.42    0.67
 -10  -3  -4    1.68    1.31
 -10  -3  -4    1.33    0.82
 -10  -3  -5    8.77    1.97
 -10  -3  -5    6.00    1.23
 -10  -3  -6    3.30    1.30
  10   3   6    5.27    1.30
 -10  -3  -6    3.28    1.06
 -10  -3  -7   57.25    4.21
  10   3   7   52.82    3.53
 -10  -3  -7   51.23    3.49
 -10  -4   2   60.78    4.66
 -10  -4   1   59.48    4.52
 -10  -4   0   36.52    3.68
 -10  -4  -1    6.15    1.78
 -10  -4  -3    1.27    1.44
 -10  -4  -4    9.95    2.08
 -10  -4  -5  215.30    8.28
 -10  -4  -5  209.28    6.08
 -10  -4  -6   32.32    2.60
 -10  -4  -6   38.15    3.53
  10   4   6   35.72    2.91
 -10  -4  -7    2.52    1.64
 -10  -4  -7    0.68    1.45
  10   4   7    0.40    1.09
 -10  -5   1   47.72    4.06
 -10  -5   0    0.63    1.45
 -10  -5  -1  266.34    9.20
 -10  -5  -2   14.37    2.30
 -10  -5  -3   -1.48    1.42
 -10  -5  -4    1.37    1.28
 -10  -5  -5  241.69    8.62
 -10  -5  -6   40.28    3.54
 -10  -5  -7  438.98    9.30
 -10  -5  -7  441.26   11.41
  10   5   7  444.49   10.38
 -10  -6   1   53.48    4.31
 -10  -6   0    8.04    1.88
 -10  -6  -1   18.29    2.65
 -10  -6  -2    5.43    1.64
 -10  -6  -3   52.21    4.11
 -10  -6  -4  180.99    7.42
 -10  -6  -5  116.87    5.98
 -10  -6  -6  383.78   10.72
 -10  -6  -7    5.53    1.72
  10   6   7    8.45    1.85
 -10  -7   0  190.31    7.89
 -10  -7  -1   76.95    5.08
 -10  -7  -2  192.14    7.69
 -10  -7  -3  158.52    6.99
 -10  -7  -4    3.77    1.41
 -10  -7  -5  192.48    7.75
 -10  -7  -6    0.75    1.39
 -10  -8  -3   20.40    2.68
 -10  -8  -4  268.71    9.15
   0   0   0    0.00    0.00


TITL Kat1c in P-1
REM P-1 (#2 in standard setting)
CELL 0.71075   8.379300   8.818694  10.087655  80.9609  76.0567  68.2689
ZERR    2.00   0.000324   0.000395   0.000387   0.0034   0.0033   0.0039
LATT  1
SFAC C H B N O
UNIT 8.00 32.00 10.00 2.00 20.00
TREF
HKLF 4
END
_computing_structure_solution     'SHELXT 2018/2 (Sheldrick, 2018)'
;
_shelx_hkl_checksum                62185
_olex2_diffrn_ambient_temperature_device  'Oxford Cryosystems'
_olex2_submission_original_sample_id  MAB/BMD4
_olex2_submission_special_instructions  'No special instructions were received'
_oxdiff_exptl_absorpt_empirical_details
;
Empirical correction (ABSPACK) includes:
- Absorption correction using spherical harmonics
- Frame scaling
- Detector area scaling
;
_oxdiff_exptl_absorpt_empirical_full_max  1.637
_oxdiff_exptl_absorpt_empirical_full_min  0.686
