# Supplementary material for: Pentaborate(1-) Salts and a Tetraborate(2-) Salt Derived from C2- or C3-Linked Bis(alkylammonium) Dications: Synthesis, Characterization, and Structural (XRD) Studies
Source: Molecules. 2019 Dec 23;25(1):53. doi: 10.3390/molecules25010053 (PMC6982793; doi:10.3390/molecules25010053)
Supplement: Supplementary file 1 [file molecules-25-00053-s001.zip › MAB7.cif]

data_MAB7

#2017ncs0414

_audit_creation_date               2019-11-27
_audit_creation_method
;
Olex2 1.3
(compiled 2019.09.11 svn.r3662 for OlexSys, GUI svn.r5938)
;
_shelx_SHELXL_version_number       '2018/3'
loop_
  _audit_author_name
  _audit_author_email
  _audit_author_address
 'Beckett, M.A.' ''
;
Bangor University
School of Chemistry
Bangor
LL57 2UW
UK
;
 'Horton, P.N.' pnh@soton.ac.uk
;
University of Southampton
Chemistry
Southampton
SO17 1BJ
UK
;

_audit_contact_author_address      ?
_audit_contact_author_email        ?
_audit_contact_author_name         ''
_audit_contact_author_phone        ?
_publ_contact_author_id_orcid      ?
_publ_section_references
;
Dolomanov, O.V., Bourhis, L.J., Gildea, R.J, Howard, J.A.K. & Puschmann, H.
 (2009), J. Appl. Cryst. 42, 339-341.

Sheldrick, G.M. (2015). Acta Cryst. A71, 3-8.

Sheldrick, G.M. (2015). Acta Cryst. C71, 3-8.
;
_chemical_name_common              ?
_chemical_name_systematic          ?
_chemical_formula_moiety           'B5 H4 O10, 1(C6 H14 N)'
_chemical_formula_sum              'C6 H18 B5 N O10'
_chemical_formula_weight           318.26
_chemical_melting_point            ?
_chemical_oxdiff_formula           'C18 H56 N2 B10 O20'
_chemical_oxdiff_usercomment       MAB/TR/B5(2)
loop_
  _atom_type_symbol
  _atom_type_description
  _atom_type_scat_dispersion_real
  _atom_type_scat_dispersion_imag
  _atom_type_scat_source
 'C' 'C' 0.0181 0.0091 'International Tables Vol C Tables 4.2.6.8 and 6.1.1.4'
 'H' 'H' 0.0000 0.0000 'International Tables Vol C Tables 4.2.6.8 and 6.1.1.4'
 'B' 'B' 0.0090 0.0039 'International Tables Vol C Tables 4.2.6.8 and 6.1.1.4'
 'N' 'N' 0.0311 0.0180 'International Tables Vol C Tables 4.2.6.8 and 6.1.1.4'
 'O' 'O' 0.0492 0.0322 'International Tables Vol C Tables 4.2.6.8 and 6.1.1.4'

_shelx_space_group_comment
;
The symmetry employed for this shelxl refinement is uniquely defined
by the following loop, which should always be used as a source of
symmetry information in preference to the above space-group names.
They are only intended as comments.
;
_space_group_crystal_system        'monoclinic'
_space_group_IT_number             14
_space_group_name_H-M_alt          'P 1 21/c 1'
_space_group_name_Hall             '-P 2ybc'
loop_
  _space_group_symop_operation_xyz
 'x, y, z'
 '-x, y+1/2, -z+1/2'
 '-x, -y, -z'
 'x, -y-1/2, z-1/2'

_cell_length_a                     9.54050(10)
_cell_length_b                     16.1031(2)
_cell_length_c                     9.43280(10)
_cell_angle_alpha                  90
_cell_angle_beta                   90.1710(10)
_cell_angle_gamma                  90
_cell_volume                       1449.17(3)
_cell_formula_units_Z              4
_cell_measurement_reflns_used      7675
_cell_measurement_temperature      100(2)
_cell_measurement_theta_max        70.0820
_cell_measurement_theta_min        5.3590
_shelx_estimated_absorpt_T_max     0.957
_shelx_estimated_absorpt_T_min     0.862
_exptl_absorpt_coefficient_mu      1.096
_exptl_absorpt_correction_T_max    1.00000
_exptl_absorpt_correction_T_min    0.90575
_exptl_absorpt_correction_type     multi-scan
_exptl_absorpt_process_details
;
CrysAlisPro 1.171.40.53 (Rigaku Oxford Diffraction, 2019)
Empirical absorption correction using spherical harmonics,
 implemented in SCALE3 ABSPACK scaling algorithm.
;
_exptl_absorpt_special_details     ?
_exptl_crystal_colour              colourless
_exptl_crystal_colour_primary      colourless
_exptl_crystal_density_diffrn      1.459
_exptl_crystal_density_meas        ?
_exptl_crystal_density_method      ?
_exptl_crystal_description         block
_exptl_crystal_F_000               664
_exptl_crystal_recrystallization_method 
 'The material was recrystallised from a mixture of water and methanol'
_exptl_crystal_size_max            0.14
_exptl_crystal_size_mid            0.12
_exptl_crystal_size_min            0.04
_exptl_transmission_factor_max     ?
_exptl_transmission_factor_min     ?
_diffrn_reflns_av_R_equivalents    0.0236
_diffrn_reflns_av_unetI/netI       0.0177
_diffrn_reflns_Laue_measured_fraction_full  1.000
_diffrn_reflns_Laue_measured_fraction_max  1.000
_diffrn_reflns_limit_h_max         11
_diffrn_reflns_limit_h_min         -11
_diffrn_reflns_limit_k_max         18
_diffrn_reflns_limit_k_min         -19
_diffrn_reflns_limit_l_max         10
_diffrn_reflns_limit_l_min         -11
_diffrn_reflns_number              13531
_diffrn_reflns_point_group_measured_fraction_full  1.000
_diffrn_reflns_point_group_measured_fraction_max  1.000
_diffrn_reflns_theta_full          67.679
_diffrn_reflns_theta_max           68.183
_diffrn_reflns_theta_min           4.635
_diffrn_ambient_temperature        100(2)
_diffrn_detector                   'hybrid pixel detector'
_diffrn_detector_area_resol_mean   10
_diffrn_detector_dtime             0.000
_diffrn_detector_type              'Rigaku, HyPix 6000'
_diffrn_measured_fraction_theta_full  1.000
_diffrn_measured_fraction_theta_max  1.000
_diffrn_measurement_details
;
List of Runs (angles in degrees, time in seconds):

  # Type    Start    End  Width  t~exp~   \w     \q     \k     \f   Frames
--------------------------------------------------------------------------
  1  \w    -84.00  94.00   0.50    0.50    --    5.00  17.00 -99.00  356
  2  \w    -89.00  89.00   0.50    0.50    --    0.00  60.00-180.00  356
  3  \w   -175.00-129.00   0.50    2.00    --  -90.00  60.00  30.00   92
  4  \w   -103.00 -37.00   0.50    2.00    --  -90.00  60.00  30.00  132
  5  \w    -32.00  -2.00   0.50    2.00    --  -90.00  60.00  30.00   60
  6  \w   -179.00  -1.00   0.50    2.00    --  -90.00  57.00 150.00  356
  7  \w   -179.00 -24.00   0.50    2.00    --  -90.00  57.00  90.00  310
  8  \w   -177.00-110.00   0.50    2.00    --  -90.00  57.00-180.00  134
  9  \w    -88.00 -51.00   0.50    2.00    --  -90.00  57.00-180.00   74
 10  \w   -179.00  -2.00   0.50    2.00    --  -90.00  29.00-180.00  354
 11  \w   -179.00  -1.00   0.50    2.00    --  -90.00  17.00 -99.00  356
;
_diffrn_measurement_device         'four-circle diffractometer'
_diffrn_measurement_device_details  'Rigaku, AFC11 quarter \c goniometer'
_diffrn_measurement_device_type
;
Rigaku 007HF equipped with Varimax confocal mirrors and an AFC11 goniometer and HyPix 6000 detector
;
_diffrn_measurement_method         'profile data from \w-scans'
_diffrn_measurement_specimen_support  'MiTeGen loops'
_diffrn_orient_matrix_type        
 'CrysAlisPro convention (1999,Acta A55,543-557)'
_diffrn_orient_matrix_UB_11        -0.0220719000
_diffrn_orient_matrix_UB_12        -0.0277870000
_diffrn_orient_matrix_UB_13        0.1546844000
_diffrn_orient_matrix_UB_21        -0.1599663000
_diffrn_orient_matrix_UB_22        0.0041662000
_diffrn_orient_matrix_UB_23        -0.0216711000
_diffrn_orient_matrix_UB_31        -0.0005964000
_diffrn_orient_matrix_UB_32        -0.0914213000
_diffrn_orient_matrix_UB_33        -0.0478512000
_diffrn_radiation_collimation      'Varimax focusing mirrors'
_diffrn_radiation_monochromator    mirror
_diffrn_radiation_probe            x-ray
_diffrn_radiation_type             'Cu K\a'
_diffrn_radiation_wavelength       1.54178
_diffrn_radiation_wavelength_determination  fundamental
_diffrn_source                     'Rotating anode'
_diffrn_source_current             30.0
_diffrn_source_power               1.2
_diffrn_source_target              Cu
_diffrn_source_type                'Rigaku 007 HF'
_diffrn_source_voltage             40.0
_reflns_Friedel_coverage           0.000
_reflns_Friedel_fraction_full      .
_reflns_Friedel_fraction_max       .
_reflns_number_gt                  2427
_reflns_number_total               2661
_reflns_odcompleteness_completeness  99.96
_reflns_odcompleteness_iscentric   1
_reflns_odcompleteness_theta       68.13
_reflns_special_details
;
 Reflections were merged by SHELXL according to the crystal
 class for the calculation of statistics and refinement.
 
 _reflns_Friedel_fraction is defined as the number of unique
 Friedel pairs measured divided by the number that would be
 possible theoretically, ignoring centric projections and
 systematic absences.
;
_reflns_threshold_expression       'I > 2\s(I)'
_computing_cell_refinement         'CrysAlisPro 1.171.40.53 (Rigaku OD, 2019)'
_computing_data_collection         'CrysAlisPro 1.171.39.28e (Rigaku OD, 2015)'
_computing_data_reduction          'CrysAlisPro 1.171.40.53 (Rigaku OD, 2019)'
_computing_molecular_graphics      'Olex2 1.3 (Dolomanov et al., 2009)'
_computing_publication_material    'Olex2 1.3 (Dolomanov et al., 2009)'
_computing_structure_refinement    'ShelXL 2018/3 (Sheldrick, 2015)'
_computing_structure_solution      'SHELXT 2018/2 (Sheldrick, 2018)'
_refine_diff_density_max           0.211
_refine_diff_density_min           -0.238
_refine_diff_density_rms           0.038
_refine_ls_extinction_coef         .
_refine_ls_extinction_method       none
_refine_ls_goodness_of_fit_ref     1.068
_refine_ls_hydrogen_treatment      constr
_refine_ls_matrix_type             full
_refine_ls_number_parameters       271
_refine_ls_number_reflns           2661
_refine_ls_number_restraints       562
_refine_ls_R_factor_all            0.0342
_refine_ls_R_factor_gt             0.0314
_refine_ls_restrained_S_all        1.007
_refine_ls_shift/su_max            0.001
_refine_ls_shift/su_mean           0.000
_refine_ls_structure_factor_coef   Fsqd
_refine_ls_weighting_details      
 'w=1/[\s^2^(Fo^2^)+(0.0435P)^2^+0.4152P] where P=(Fo^2^+2Fc^2^)/3'
_refine_ls_weighting_scheme        calc
_refine_ls_wR_factor_gt            0.0827
_refine_ls_wR_factor_ref           0.0845
_refine_special_details           
 'The ammonium cation is disordered over 3 positions, as such the atoms of the 2 minor components have been left isotropic and various restraints (SADI, RIGU, SIMU and SUMP) have been used.'
_olex2_refinement_description
;
1. Fixed Uiso
 At 1.2 times of:
  All C(H) groups, All C(H,H) groups
 At 1.5 times of:
  All C(H,H,H) groups, All O(H) groups
2. Restrained distances
 N1C-C1C \\sim N1-C1 \\sim N1B-C1B
 with sigma of 0.01
 C1C-C2C \\sim C1-C2 \\sim C1C-C2C
 with sigma of 0.01
 C3-C2 \\sim C2B-C3B \\sim C2C-C3C
 with sigma of 0.01
 C2-N1 \\sim N1B-C2B \\sim N1C-C2C
 with sigma of 0.02
 C3B-C1B \\sim C1-C3 \\sim C3C-C1C
 with sigma of 0.02
 N1B-C5B \\sim N1-C5 \\sim N1-C6 \\sim N1B-C6B \\sim N1B-C4B \\sim N1-C4 \\sim
N1C-C5C \\sim N1C-C6C \\sim N1C-
 C4C
 with sigma of 0.01
 C1B-C5B \\sim C1-C5 \\sim C1-C6 \\sim C1B-C6B \\sim C1B-C4B \\sim C1-C4 \\sim
C1C-C5C \\sim C1C-C6C \\sim C1C-
 C4C
 with sigma of 0.02
3. Uiso/Uaniso restraints and constraints
N1 \\sim C1 \\sim C2 \\sim C3 \\sim C4 \\sim C5 \\sim C6 \\sim N1B \\sim C1B
\\sim C2B \\sim C3B \\sim C4B \\sim C5B \\sim C6B \\sim N1C \\sim C1C \\sim C2C
\\sim C3C \\sim C4C \\sim C5C \\sim C6C: within 2A with sigma of 0.04 and sigma
for terminal atoms of 0.08 within 2A
4. Rigid body (RIGU) restrains
 All non-hydrogen atoms
 with sigma for 1-2 distances of 0.004 and sigma for 1-3 distances of 0.004
5. Others
 1*[Sof(N1)+Sof(C1)+Sof(H1A)+Sof(H1B)+Sof(C2)+Sof(H2)+Sof(C3)+Sof(H3A)+
 Sof(H3B)+Sof(C4)+Sof(H4A)+Sof(H4B)+Sof(H4C)+Sof(C5)+Sof(H5A)+Sof(H5B)+Sof(H5C)+
 Sof(C6)+Sof(H6A)+Sof(H6B)+Sof(H6C)]+1*[Sof(N1B)+Sof(C1B)+Sof(H1BA)+Sof(H1BB)+
 Sof(C2B)+Sof(H2B)+Sof(C3B)+Sof(H3BA)+Sof(H3BB)+Sof(C4B)+Sof(H4BA)+Sof(H4BB)+
 Sof(H4BC)+Sof(C5B)+Sof(H5BA)+Sof(H5BB)+Sof(H5BC)+Sof(C6B)+Sof(H6BA)+Sof(H6BB)+
 Sof(H6BC)]+1*[Sof(N1C)+Sof(C1C)+Sof(H1CA)+Sof(H1CB)+Sof(C2C)+Sof(H2C)+Sof(C3C)+
 Sof(H3CA)+Sof(H3CB)+Sof(C4C)+Sof(H4CA)+Sof(H4CB)+Sof(H4CC)+Sof(C5C)+Sof(H5CA)+
 Sof(H5CB)+Sof(H5CC)+Sof(C6C)+Sof(H6CA)+Sof(H6CB)+Sof(H6CC)]=1 with esd of
 0.00001
 Sof(N1)=Sof(C1)=Sof(H1A)=Sof(H1B)=Sof(C2)=Sof(H2)=Sof(C3)=Sof(H3A)=Sof(H3B)=
 Sof(C4)=Sof(H4A)=Sof(H4B)=Sof(H4C)=Sof(C5)=Sof(H5A)=Sof(H5B)=Sof(H5C)=Sof(C6)=
 Sof(H6A)=Sof(H6B)=Sof(H6C)=FVAR(1)
 Sof(N1B)=Sof(C1B)=Sof(H1BA)=Sof(H1BB)=Sof(C2B)=Sof(H2B)=Sof(C3B)=Sof(H3BA)=
 Sof(H3BB)=Sof(C4B)=Sof(H4BA)=Sof(H4BB)=Sof(H4BC)=Sof(C5B)=Sof(H5BA)=Sof(H5BB)=
 Sof(H5BC)=Sof(C6B)=Sof(H6BA)=Sof(H6BB)=Sof(H6BC)=FVAR(2)
 Sof(N1C)=Sof(C1C)=Sof(H1CA)=Sof(H1CB)=Sof(C2C)=Sof(H2C)=Sof(C3C)=Sof(H3CA)=
 Sof(H3CB)=Sof(C4C)=Sof(H4CA)=Sof(H4CB)=Sof(H4CC)=Sof(C5C)=Sof(H5CA)=Sof(H5CB)=
 Sof(H5CC)=Sof(C6C)=Sof(H6CA)=Sof(H6CB)=Sof(H6CC)=FVAR(3)
6.a Secondary CH2 refined with riding coordinates:
 C1(H1A,H1B), C1B(H1BA,H1BB), C1C(H1CA,H1CB)
6.b Aromatic/amide H refined with riding coordinates:
 C2(H2), C2B(H2B), C2C(H2C)
6.c X=CH2 refined with riding coordinates:
 C3(H3A,H3B), C3B(H3BA,H3BB), C3C(H3CA,H3CB)
6.d Idealised Me refined as rotating group:
 C4(H4A,H4B,H4C), C5(H5A,H5B,H5C), C6(H6A,H6B,H6C), C4B(H4BA,H4BB,H4BC),
 C5B(H5BA,H5BB,H5BC), C6B(H6BA,H6BB,H6BC), C4C(H4CA,H4CB,H4CC), C5C(H5CA,H5CB,
 H5CC), C6C(H6CA,H6CB,H6CC)
6.e Idealised tetrahedral OH refined as rotating group:
 O7(H7), O8(H8), O9(H9), O10(H10)
;
_atom_sites_solution_hydrogens     geom
_atom_sites_solution_primary       dual
_atom_sites_solution_secondary     ?
loop_
  _atom_site_label
  _atom_site_type_symbol
  _atom_site_fract_x
  _atom_site_fract_y
  _atom_site_fract_z
  _atom_site_U_iso_or_equiv
  _atom_site_adp_type
  _atom_site_occupancy
  _atom_site_site_symmetry_order
  _atom_site_calc_flag
  _atom_site_refinement_flags_posn
  _atom_site_refinement_flags_adp
  _atom_site_refinement_flags_occupancy
  _atom_site_disorder_assembly
  _atom_site_disorder_group
 O1 O 0.24098(8) 0.67408(5) 0.51286(8) 0.02045(19) Uani 1 1 d . . . . .
 O2 O -0.00258(8) 0.64531(5) 0.48812(9) 0.0240(2) Uani 1 1 d . . . . .
 O3 O 0.16126(8) 0.57492(5) 0.33860(8) 0.01938(19) Uani 1 1 d . . . . .
 O4 O 0.40138(8) 0.57568(5) 0.41483(8) 0.01875(19) Uani 1 1 d . . . . .
 O5 O 0.55670(8) 0.66526(5) 0.28906(9) 0.0224(2) Uani 1 1 d . . . . .
 O6 O 0.30994(8) 0.68695(5) 0.26946(8) 0.0210(2) Uani 1 1 d . . . . .
 O7 O 0.07342(9) 0.73828(6) 0.66282(10) 0.0320(2) Uani 1 1 d . . . . .
 H7 H 0.146707 0.760920 0.693733 0.048 Uiso 1 1 calc R U . . .
 O8 O -0.07704(8) 0.54212(6) 0.32420(9) 0.0268(2) Uani 1 1 d . . . . .
 H8 H -0.153868 0.555823 0.360637 0.040 Uiso 1 1 calc R U . . .
 O9 O 0.64885(8) 0.55550(5) 0.41996(9) 0.0236(2) Uani 1 1 d . . . . .
 H9 H 0.624197 0.515566 0.471460 0.035 Uiso 1 1 calc R U . . .
 O10 O 0.47225(8) 0.76740(6) 0.13629(10) 0.0297(2) Uani 1 1 d . . . . .
 H10 H 0.397099 0.786649 0.103295 0.045 Uiso 1 1 calc R U . . .
 B1 B 0.27679(12) 0.62721(8) 0.38336(13) 0.0176(3) Uani 1 1 d . . . . .
 B2 B 0.10656(13) 0.68617(9) 0.55475(14) 0.0217(3) Uani 1 1 d . . . . .
 B3 B 0.02809(13) 0.58742(8) 0.38376(14) 0.0195(3) Uani 1 1 d . . . . .
 B4 B 0.53353(13) 0.59854(8) 0.37735(14) 0.0191(3) Uani 1 1 d . . . . .
 B5 B 0.44296(13) 0.70728(9) 0.23190(14) 0.0209(3) Uani 1 1 d . . . . .
 N1 N 0.2139(7) 0.3811(3) 0.0917(5) 0.0220(15) Uani 0.485(3) 1 d D U P A 1
 C1 C 0.3063(3) 0.43261(18) -0.0038(3) 0.0303(7) Uani 0.485(3) 1 d D U P A 1
 H1A H 0.404063 0.412836 0.006217 0.036 Uiso 0.485(3) 1 calc R U P A 1
 H1B H 0.277253 0.423033 -0.103322 0.036 Uiso 0.485(3) 1 calc R U P A 1
 C2 C 0.3033(3) 0.52255(19) 0.0243(3) 0.0323(7) Uani 0.485(3) 1 d D U P A 1
 H2 H 0.304754 0.541454 0.119648 0.039 Uiso 0.485(3) 1 calc R U P A 1
 C3 C 0.2984(14) 0.5798(5) -0.0832(12) 0.045(3) Uani 0.485(3) 1 d D U P A 1
 H3A H 0.296825 0.561874 -0.179175 0.054 Uiso 0.485(3) 1 calc R U P A 1
 H3B H 0.296517 0.637455 -0.061784 0.054 Uiso 0.485(3) 1 calc R U P A 1
 C4 C 0.0642(6) 0.4096(9) 0.0828(18) 0.031(2) Uani 0.485(3) 1 d D U P A 1
 H4A H 0.056334 0.465667 0.122526 0.046 Uiso 0.485(3) 1 calc R U P A 1
 H4B H 0.004504 0.371523 0.136711 0.046 Uiso 0.485(3) 1 calc R U P A 1
 H4C H 0.033961 0.410269 -0.016565 0.046 Uiso 0.485(3) 1 calc R U P A 1
 C5 C 0.2629(5) 0.3851(3) 0.2432(4) 0.0291(12) Uani 0.485(3) 1 d D U P A 1
 H5A H 0.254557 0.442239 0.277997 0.044 Uiso 0.485(3) 1 calc R U P A 1
 H5B H 0.361003 0.367404 0.248804 0.044 Uiso 0.485(3) 1 calc R U P A 1
 H5C H 0.204997 0.348310 0.301475 0.044 Uiso 0.485(3) 1 calc R U P A 1
 C6 C 0.2180(5) 0.2930(2) 0.0385(5) 0.0342(8) Uani 0.485(3) 1 d D U P A 1
 H6A H 0.160787 0.257743 0.100209 0.051 Uiso 0.485(3) 1 calc R U P A 1
 H6B H 0.314995 0.272997 0.039200 0.051 Uiso 0.485(3) 1 calc R U P A 1
 H6C H 0.180851 0.290918 -0.058363 0.051 Uiso 0.485(3) 1 calc R U P A 1
 N1B N 0.2137(11) 0.3837(5) 0.1063(8) 0.025(3) Uiso 0.292(3) 1 d D U P B 2
 C1B C 0.3144(5) 0.4553(3) 0.0872(5) 0.0252(11) Uiso 0.292(3) 1 d D U P B 2
 H1BA H 0.290711 0.499262 0.156495 0.030 Uiso 0.292(3) 1 calc R U P B 2
 H1BB H 0.410422 0.435730 0.109121 0.030 Uiso 0.292(3) 1 calc R U P B 2
 C2B C 0.3134(8) 0.4910(4) -0.0536(10) 0.026(2) Uiso 0.292(3) 1 d D U P B 2
 H2B H 0.331683 0.456510 -0.133218 0.032 Uiso 0.292(3) 1 calc R U P B 2
 C3B C 0.2866(18) 0.5735(6) -0.0738(13) 0.023(3) Uiso 0.292(3) 1 d D U P B 2
 H3BA H 0.268269 0.608345 0.005273 0.028 Uiso 0.292(3) 1 calc R U P B 2
 H3BB H 0.286345 0.596034 -0.166873 0.028 Uiso 0.292(3) 1 calc R U P B 2
 C4B C 0.0673(11) 0.4089(15) 0.067(3) 0.032(5) Uiso 0.292(3) 1 d D U P B 2
 H4BA H 0.035810 0.453191 0.130857 0.048 Uiso 0.292(3) 1 calc R U P B 2
 H4BB H 0.004710 0.360909 0.076217 0.048 Uiso 0.292(3) 1 calc R U P B 2
 H4BC H 0.065605 0.428961 -0.030806 0.048 Uiso 0.292(3) 1 calc R U P B 2
 C5B C 0.2204(9) 0.3531(5) 0.2554(7) 0.036(3) Uiso 0.292(3) 1 d D U P B 2
 H5BA H 0.316187 0.335049 0.277215 0.054 Uiso 0.292(3) 1 calc R U P B 2
 H5BB H 0.155969 0.306198 0.266814 0.054 Uiso 0.292(3) 1 calc R U P B 2
 H5BC H 0.193510 0.397910 0.320116 0.054 Uiso 0.292(3) 1 calc R U P B 2
 C6B C 0.2613(8) 0.3118(5) 0.0173(10) 0.0223(19) Uiso 0.292(3) 1 d D U P B 2
 H6BA H 0.218292 0.260560 0.052429 0.033 Uiso 0.292(3) 1 calc R U P B 2
 H6BB H 0.363548 0.307048 0.022842 0.033 Uiso 0.292(3) 1 calc R U P B 2
 H6BC H 0.233032 0.320940 -0.081453 0.033 Uiso 0.292(3) 1 calc R U P B 2
 N1C N 0.1911(8) 0.3849(5) 0.0981(10) 0.020(3) Uiso 0.223(3) 1 d D U P C 3
 C1C C 0.2373(5) 0.4704(3) 0.0564(5) 0.0178(12) Uiso 0.223(3) 1 d D U P C 3
 H1CA H 0.154015 0.506614 0.066084 0.021 Uiso 0.223(3) 1 calc R U P C 3
 H1CB H 0.304892 0.488637 0.129909 0.021 Uiso 0.223(3) 1 calc R U P C 3
 C2C C 0.2975(10) 0.4903(5) -0.0736(9) 0.023(3) Uiso 0.223(3) 1 d D U P C 3
 H2C H 0.315710 0.447083 -0.139518 0.028 Uiso 0.223(3) 1 calc R U P C 3
 C3C C 0.3317(16) 0.5711(8) -0.1097(17) 0.058(5) Uiso 0.223(3) 1 d D U P C 3
 H3CA H 0.314126 0.615090 -0.044979 0.069 Uiso 0.223(3) 1 calc R U P C 3
 H3CB H 0.372618 0.582643 -0.199273 0.069 Uiso 0.223(3) 1 calc R U P C 3
 C4C C 0.0343(8) 0.3828(5) 0.1004(10) 0.030(2) Uiso 0.223(3) 1 d D U P C 3
 H4CA H -0.000656 0.427147 0.162035 0.045 Uiso 0.223(3) 1 calc R U P C 3
 H4CB H 0.002767 0.328904 0.136688 0.045 Uiso 0.223(3) 1 calc R U P C 3
 H4CC H -0.002002 0.390853 0.004099 0.045 Uiso 0.223(3) 1 calc R U P C 3
 C5C C 0.2342(16) 0.3702(10) 0.2506(11) 0.014(3) Uiso 0.223(3) 1 d D U P C 3
 H5CA H 0.197976 0.415142 0.310160 0.022 Uiso 0.223(3) 1 calc R U P C 3
 H5CB H 0.336743 0.368828 0.257345 0.022 Uiso 0.223(3) 1 calc R U P C 3
 H5CC H 0.195927 0.317043 0.283068 0.022 Uiso 0.223(3) 1 calc R U P C 3
 C6C C 0.2406(15) 0.3188(6) -0.0018(11) 0.033(3) Uiso 0.223(3) 1 d D U P C 3
 H6CA H 0.233233 0.339043 -0.099513 0.049 Uiso 0.223(3) 1 calc R U P C 3
 H6CB H 0.182421 0.269107 0.009366 0.049 Uiso 0.223(3) 1 calc R U P C 3
 H6CC H 0.338493 0.305085 0.019500 0.049 Uiso 0.223(3) 1 calc R U P C 3

loop_
  _atom_site_aniso_label
  _atom_site_aniso_U_11
  _atom_site_aniso_U_22
  _atom_site_aniso_U_33
  _atom_site_aniso_U_23
  _atom_site_aniso_U_13
  _atom_site_aniso_U_12
 O1 0.0130(4) 0.0251(4) 0.0232(4) -0.0047(3) 0.0000(3) 0.0000(3)
 O2 0.0128(4) 0.0310(5) 0.0282(4) -0.0097(4) 0.0015(3) -0.0002(3)
 O3 0.0124(4) 0.0226(4) 0.0232(4) -0.0033(3) 0.0013(3) -0.0010(3)
 O4 0.0118(4) 0.0214(4) 0.0230(4) 0.0019(3) 0.0010(3) 0.0010(3)
 O5 0.0117(4) 0.0279(5) 0.0275(4) 0.0078(4) 0.0001(3) -0.0001(3)
 O6 0.0131(4) 0.0247(4) 0.0251(4) 0.0052(3) -0.0001(3) 0.0007(3)
 O7 0.0153(4) 0.0422(6) 0.0386(5) -0.0210(4) 0.0013(4) -0.0019(4)
 O8 0.0130(4) 0.0340(5) 0.0334(5) -0.0125(4) 0.0029(3) -0.0026(3)
 O9 0.0130(4) 0.0283(5) 0.0295(5) 0.0092(4) 0.0016(3) 0.0018(3)
 O10 0.0140(4) 0.0359(5) 0.0391(5) 0.0171(4) -0.0007(4) -0.0001(3)
 B1 0.0121(6) 0.0204(6) 0.0204(6) -0.0003(5) -0.0002(5) 0.0010(5)
 B2 0.0149(6) 0.0249(7) 0.0252(7) -0.0034(5) -0.0003(5) 0.0007(5)
 B3 0.0145(6) 0.0223(6) 0.0217(6) -0.0005(5) 0.0009(5) 0.0001(5)
 B4 0.0143(6) 0.0234(7) 0.0197(6) -0.0006(5) 0.0007(5) -0.0002(5)
 B5 0.0147(6) 0.0246(7) 0.0235(6) 0.0009(5) -0.0010(5) -0.0005(5)
 N1 0.0140(19) 0.027(2) 0.025(2) -0.0011(10) 0.0031(13) 0.0027(11)
 C1 0.0254(14) 0.0394(17) 0.0261(14) -0.0056(12) 0.0052(11) -0.0048(12)
 C2 0.0302(15) 0.0373(16) 0.0296(15) -0.0060(14) 0.0035(12) -0.0069(12)
 C3 0.041(4) 0.035(3) 0.059(4) 0.009(2) -0.004(3) -0.012(3)
 C4 0.015(2) 0.040(4) 0.038(5) -0.001(3) -0.0009(15) 0.0069(16)
 C5 0.032(3) 0.026(2) 0.0292(18) 0.0026(13) -0.0046(15) -0.0039(19)
 C6 0.031(2) 0.0244(17) 0.047(2) -0.0118(17) -0.0063(16) 0.0049(16)

_geom_special_details
;
 All esds (except the esd in the dihedral angle between two l.s. planes)
 are estimated using the full covariance matrix.  The cell esds are taken
 into account individually in the estimation of esds in distances, angles
 and torsion angles; correlations between esds in cell parameters are only
 used when they are defined by crystal symmetry.  An approximate (isotropic)
 treatment of cell esds is used for estimating esds involving l.s. planes.
;
loop_
  _geom_bond_atom_site_label_1
  _geom_bond_atom_site_label_2
  _geom_bond_distance
  _geom_bond_site_symmetry_2
  _geom_bond_publ_flag
 O1 B1 1.4769(14) . ?
 O1 B2 1.3571(15) . ?
 O2 B2 1.3813(15) . ?
 O2 B3 1.3877(16) . ?
 O3 B1 1.4489(14) . ?
 O3 B3 1.3563(15) . ?
 O4 B1 1.4790(14) . ?
 O4 B4 1.3611(15) . ?
 O5 B4 1.3777(16) . ?
 O5 B5 1.3865(15) . ?
 O6 B1 1.4771(15) . ?
 O6 B5 1.3587(15) . ?
 O7 H7 0.8400 . ?
 O7 B2 1.3584(16) . ?
 O8 H8 0.8400 . ?
 O8 B3 1.3602(15) . ?
 O9 H9 0.8400 . ?
 O9 B4 1.3601(15) . ?
 O10 H10 0.8400 . ?
 O10 B5 1.3529(16) . ?
 N1 C1 1.510(5) . ?
 N1 C4 1.502(5) . ?
 N1 C5 1.503(5) . ?
 N1 C6 1.506(5) . ?
 C1 H1A 0.9900 . ?
 C1 H1B 0.9900 . ?
 C1 C2 1.473(4) . ?
 C2 H2 0.9500 . ?
 C2 C3 1.371(6) . ?
 C3 H3A 0.9500 . ?
 C3 H3B 0.9500 . ?
 C4 H4A 0.9800 . ?
 C4 H4B 0.9800 . ?
 C4 H4C 0.9800 . ?
 C5 H5A 0.9800 . ?
 C5 H5B 0.9800 . ?
 C5 H5C 0.9800 . ?
 C6 H6A 0.9800 . ?
 C6 H6B 0.9800 . ?
 C6 H6C 0.9800 . ?
 N1B C1B 1.511(7) . ?
 N1B C4B 1.500(7) . ?
 N1B C5B 1.492(7) . ?
 N1B C6B 1.501(7) . ?
 C1B H1BA 0.9900 . ?
 C1B H1BB 0.9900 . ?
 C1B C2B 1.448(9) . ?
 C2B H2B 0.9500 . ?
 C2B C3B 1.367(8) . ?
 C3B H3BA 0.9500 . ?
 C3B H3BB 0.9500 . ?
 C4B H4BA 0.9800 . ?
 C4B H4BB 0.9800 . ?
 C4B H4BC 0.9800 . ?
 C5B H5BA 0.9800 . ?
 C5B H5BB 0.9800 . ?
 C5B H5BC 0.9800 . ?
 C6B H6BA 0.9800 . ?
 C6B H6BB 0.9800 . ?
 C6B H6BC 0.9800 . ?
 N1C C1C 1.498(7) . ?
 N1C C4C 1.497(7) . ?
 N1C C5C 1.514(7) . ?
 N1C C6C 1.499(7) . ?
 C1C H1CA 0.9900 . ?
 C1C H1CB 0.9900 . ?
 C1C C2C 1.392(7) . ?
 C2C H2C 0.9500 . ?
 C2C C3C 1.384(8) . ?
 C3C H3CA 0.9500 . ?
 C3C H3CB 0.9500 . ?
 C4C H4CA 0.9800 . ?
 C4C H4CB 0.9800 . ?
 C4C H4CC 0.9800 . ?
 C5C H5CA 0.9800 . ?
 C5C H5CB 0.9800 . ?
 C5C H5CC 0.9800 . ?
 C6C H6CA 0.9800 . ?
 C6C H6CB 0.9800 . ?
 C6C H6CC 0.9800 . ?

loop_
  _geom_angle_atom_site_label_1
  _geom_angle_atom_site_label_2
  _geom_angle_atom_site_label_3
  _geom_angle
  _geom_angle_site_symmetry_1
  _geom_angle_site_symmetry_3
  _geom_angle_publ_flag
 B2 O1 B1 122.36(9) . . ?
 B2 O2 B3 118.85(9) . . ?
 B3 O3 B1 122.33(9) . . ?
 B4 O4 B1 122.73(9) . . ?
 B4 O5 B5 119.26(9) . . ?
 B5 O6 B1 123.28(9) . . ?
 B2 O7 H7 109.5 . . ?
 B3 O8 H8 109.5 . . ?
 B4 O9 H9 109.5 . . ?
 B5 O10 H10 109.5 . . ?
 O1 B1 O4 107.97(9) . . ?
 O1 B1 O6 108.62(10) . . ?
 O3 B1 O1 111.12(9) . . ?
 O3 B1 O4 110.04(10) . . ?
 O3 B1 O6 109.32(9) . . ?
 O6 B1 O4 109.74(9) . . ?
 O1 B2 O2 120.72(11) . . ?
 O1 B2 O7 121.96(11) . . ?
 O7 B2 O2 117.32(10) . . ?
 O3 B3 O2 121.48(11) . . ?
 O3 B3 O8 118.75(11) . . ?
 O8 B3 O2 119.77(10) . . ?
 O4 B4 O5 121.23(10) . . ?
 O9 B4 O4 122.32(11) . . ?
 O9 B4 O5 116.41(10) . . ?
 O6 B5 O5 120.77(11) . . ?
 O10 B5 O5 116.46(10) . . ?
 O10 B5 O6 122.76(11) . . ?
 C4 N1 C1 110.8(6) . . ?
 C4 N1 C5 109.4(8) . . ?
 C4 N1 C6 107.2(7) . . ?
 C5 N1 C1 111.3(4) . . ?
 C5 N1 C6 110.4(4) . . ?
 C6 N1 C1 107.6(4) . . ?
 N1 C1 H1A 108.5 . . ?
 N1 C1 H1B 108.5 . . ?
 H1A C1 H1B 107.5 . . ?
 C2 C1 N1 114.9(3) . . ?
 C2 C1 H1A 108.5 . . ?
 C2 C1 H1B 108.5 . . ?
 C1 C2 H2 119.0 . . ?
 C3 C2 C1 122.0(6) . . ?
 C3 C2 H2 119.0 . . ?
 C2 C3 H3A 120.0 . . ?
 C2 C3 H3B 120.0 . . ?
 H3A C3 H3B 120.0 . . ?
 N1 C4 H4A 109.5 . . ?
 N1 C4 H4B 109.5 . . ?
 N1 C4 H4C 109.5 . . ?
 H4A C4 H4B 109.5 . . ?
 H4A C4 H4C 109.5 . . ?
 H4B C4 H4C 109.5 . . ?
 N1 C5 H5A 109.5 . . ?
 N1 C5 H5B 109.5 . . ?
 N1 C5 H5C 109.5 . . ?
 H5A C5 H5B 109.5 . . ?
 H5A C5 H5C 109.5 . . ?
 H5B C5 H5C 109.5 . . ?
 N1 C6 H6A 109.5 . . ?
 N1 C6 H6B 109.5 . . ?
 N1 C6 H6C 109.5 . . ?
 H6A C6 H6B 109.5 . . ?
 H6A C6 H6C 109.5 . . ?
 H6B C6 H6C 109.5 . . ?
 C4B N1B C1B 110.9(8) . . ?
 C4B N1B C6B 110.7(13) . . ?
 C5B N1B C1B 109.8(6) . . ?
 C5B N1B C4B 111.0(12) . . ?
 C5B N1B C6B 105.1(7) . . ?
 C6B N1B C1B 109.2(7) . . ?
 N1B C1B H1BA 108.7 . . ?
 N1B C1B H1BB 108.7 . . ?
 H1BA C1B H1BB 107.6 . . ?
 C2B C1B N1B 114.2(5) . . ?
 C2B C1B H1BA 108.7 . . ?
 C2B C1B H1BB 108.7 . . ?
 C1B C2B H2B 119.5 . . ?
 C3B C2B C1B 121.0(9) . . ?
 C3B C2B H2B 119.5 . . ?
 C2B C3B H3BA 120.0 . . ?
 C2B C3B H3BB 120.0 . . ?
 H3BA C3B H3BB 120.0 . . ?
 N1B C4B H4BA 109.5 . . ?
 N1B C4B H4BB 109.5 . . ?
 N1B C4B H4BC 109.5 . . ?
 H4BA C4B H4BB 109.5 . . ?
 H4BA C4B H4BC 109.5 . . ?
 H4BB C4B H4BC 109.5 . . ?
 N1B C5B H5BA 109.5 . . ?
 N1B C5B H5BB 109.5 . . ?
 N1B C5B H5BC 109.5 . . ?
 H5BA C5B H5BB 109.5 . . ?
 H5BA C5B H5BC 109.5 . . ?
 H5BB C5B H5BC 109.5 . . ?
 N1B C6B H6BA 109.5 . . ?
 N1B C6B H6BB 109.5 . . ?
 N1B C6B H6BC 109.5 . . ?
 H6BA C6B H6BB 109.5 . . ?
 H6BA C6B H6BC 109.5 . . ?
 H6BB C6B H6BC 109.5 . . ?
 C1C N1C C5C 108.3(7) . . ?
 C1C N1C C6C 113.2(7) . . ?
 C4C N1C C1C 108.7(6) . . ?
 C4C N1C C5C 104.5(8) . . ?
 C4C N1C C6C 108.0(9) . . ?
 C6C N1C C5C 113.6(9) . . ?
 N1C C1C H1CA 106.2 . . ?
 N1C C1C H1CB 106.2 . . ?
 H1CA C1C H1CB 106.4 . . ?
 C2C C1C N1C 124.4(6) . . ?
 C2C C1C H1CA 106.2 . . ?
 C2C C1C H1CB 106.2 . . ?
 C1C C2C H2C 119.0 . . ?
 C3C C2C C1C 122.1(9) . . ?
 C3C C2C H2C 119.0 . . ?
 C2C C3C H3CA 120.0 . . ?
 C2C C3C H3CB 120.0 . . ?
 H3CA C3C H3CB 120.0 . . ?
 N1C C4C H4CA 109.5 . . ?
 N1C C4C H4CB 109.5 . . ?
 N1C C4C H4CC 109.5 . . ?
 H4CA C4C H4CB 109.5 . . ?
 H4CA C4C H4CC 109.5 . . ?
 H4CB C4C H4CC 109.5 . . ?
 N1C C5C H5CA 109.5 . . ?
 N1C C5C H5CB 109.5 . . ?
 N1C C5C H5CC 109.5 . . ?
 H5CA C5C H5CB 109.5 . . ?
 H5CA C5C H5CC 109.5 . . ?
 H5CB C5C H5CC 109.5 . . ?
 N1C C6C H6CA 109.5 . . ?
 N1C C6C H6CB 109.5 . . ?
 N1C C6C H6CC 109.5 . . ?
 H6CA C6C H6CB 109.5 . . ?
 H6CA C6C H6CC 109.5 . . ?
 H6CB C6C H6CC 109.5 . . ?

loop_
  _geom_hbond_atom_site_label_D
  _geom_hbond_atom_site_label_H
  _geom_hbond_atom_site_label_A
  _geom_hbond_distance_DH
  _geom_hbond_distance_HA
  _geom_hbond_distance_DA
  _geom_hbond_angle_DHA
  _geom_hbond_site_symmetry_A
  _geom_hbond_publ_flag
 O7 H7 O6 0.84 1.91 2.7458(11) 178.2 4_576 yes
 O8 H8 O9 0.84 1.97 2.7777(11) 162.5 1_455 yes
 O9 H9 O4 0.84 1.84 2.6693(11) 171.3 3_666 yes
 O10 H10 O1 0.84 1.83 2.6639(11) 173.9 4_575 yes

loop_
  _geom_torsion_atom_site_label_1
  _geom_torsion_atom_site_label_2
  _geom_torsion_atom_site_label_3
  _geom_torsion_atom_site_label_4
  _geom_torsion
  _geom_torsion_site_symmetry_1
  _geom_torsion_site_symmetry_2
  _geom_torsion_site_symmetry_3
  _geom_torsion_site_symmetry_4
  _geom_torsion_publ_flag
 B1 O1 B2 O2 8.94(18) . . . . ?
 B1 O1 B2 O7 -171.11(11) . . . . ?
 B1 O3 B3 O2 -7.42(17) . . . . ?
 B1 O3 B3 O8 172.26(10) . . . . ?
 B1 O4 B4 O5 -9.86(17) . . . . ?
 B1 O4 B4 O9 172.67(10) . . . . ?
 B1 O6 B5 O5 7.36(17) . . . . ?
 B1 O6 B5 O10 -173.96(11) . . . . ?
 B2 O1 B1 O3 -19.35(15) . . . . ?
 B2 O1 B1 O4 -140.11(10) . . . . ?
 B2 O1 B1 O6 100.94(12) . . . . ?
 B2 O2 B3 O3 -5.13(18) . . . . ?
 B2 O2 B3 O8 175.19(11) . . . . ?
 B3 O2 B2 O1 4.25(18) . . . . ?
 B3 O2 B2 O7 -175.70(11) . . . . ?
 B3 O3 B1 O1 18.48(15) . . . . ?
 B3 O3 B1 O4 138.01(10) . . . . ?
 B3 O3 B1 O6 -101.40(12) . . . . ?
 B4 O4 B1 O1 -99.10(11) . . . . ?
 B4 O4 B1 O3 139.47(10) . . . . ?
 B4 O4 B1 O6 19.13(14) . . . . ?
 B4 O5 B5 O6 4.45(17) . . . . ?
 B4 O5 B5 O10 -174.31(11) . . . . ?
 B5 O5 B4 O4 -3.19(17) . . . . ?
 B5 O5 B4 O9 174.42(10) . . . . ?
 B5 O6 B1 O1 99.88(12) . . . . ?
 B5 O6 B1 O3 -138.71(10) . . . . ?
 B5 O6 B1 O4 -17.95(15) . . . . ?
 N1 C1 C2 C3 -137.7(7) . . . . ?
 C4 N1 C1 C2 57.2(8) . . . . ?
 C5 N1 C1 C2 -64.8(5) . . . . ?
 C6 N1 C1 C2 174.1(4) . . . . ?
 N1B C1B C2B C3B 123.2(11) . . . . ?
 C4B N1B C1B C2B -55.6(13) . . . . ?
 C5B N1B C1B C2B -178.6(7) . . . . ?
 C6B N1B C1B C2B 66.7(9) . . . . ?
 N1C C1C C2C C3C 176.5(10) . . . . ?
 C4C N1C C1C C2C -108.8(9) . . . . ?
 C5C N1C C1C C2C 138.1(9) . . . . ?
 C6C N1C C1C C2C 11.2(11) . . . . ?

_shelx_res_file
;
TITL 2017ncs0414_4b_a.res in P2(1)/c
    2017ncs0414_4b.res
    created by SHELXL-2018/3 at 12:32:39 on 27-Nov-2019
REM Old TITL 2017ncs0414_4b in P2(1)/c
REM SHELXT solution in P2(1)/c: R1 0.166, Rweak 0.010, Alpha 0.028
REM <I/s> 0.618 for 115 systematic absences, Orientation as input
REM Formula found by SHELXT: C8 B5 N O10
CELL 1.54178 9.5405 16.1031 9.4328 90 90.171 90
ZERR 4 0.0001 0.0002 0.0001 0 0.001 0
LATT 1
SYMM -X,0.5+Y,0.5-Z
SFAC C H B N O
UNIT 24 72 20 4 40
EQIV $1 +X,1.5-Y,0.5+Z
EQIV $2 -1+X,+Y,+Z
EQIV $3 1-X,1-Y,1-Z
EQIV $4 +X,1.5-Y,-0.5+Z
SADI 0.01 N1C C1C N1 C1 N1B C1B
SADI 0.01 C1C C2C C1 C2 C1C C2C
SADI 0.01 C3 C2 C2B C3B C2C C3C
SADI C2 N1 N1B C2B N1C C2C
SADI C3B C1B C1 C3 C3C C1C
SADI 0.01 N1B C5B N1 C5 N1 C6 N1B C6B N1B C4B N1 C4 N1C C5C N1C C6C N1C C4C
SADI C1B C5B C1 C5 C1 C6 C1B C6B C1B C4B C1 C4 C1C C5C C1C C6C C1C C4C
SIMU N1 > C6C
RIGU
SUMP 1 0.00001 1 2 1 3 1 4

L.S. 9
PLAN  5
SIZE 0.04 0.12 0.14
TEMP -173(2)
HTAB O7 O6_$1
HTAB O8 O9_$2
HTAB O9 O4_$3
HTAB O10 O1_$4
CONF
HTAB
BOND $H
MORE -1
fmap 2
acta
REM <olex2.extras>
REM <HklSrc "%.\\2017ncs0414_4b.hkl">
REM </olex2.extras>

WGHT    0.043500    0.415200
FVAR       0.47853   0.48506   0.29160   0.22332
O1    5    0.240980    0.674083    0.512863    11.00000    0.01304    0.02510 =
         0.02321   -0.00473    0.00000    0.00004
O2    5   -0.002578    0.645311    0.488124    11.00000    0.01276    0.03097 =
         0.02819   -0.00965    0.00152   -0.00020
O3    5    0.161261    0.574919    0.338604    11.00000    0.01235    0.02263 =
         0.02316   -0.00326    0.00131   -0.00102
O4    5    0.401383    0.575680    0.414827    11.00000    0.01178    0.02144 =
         0.02302    0.00194    0.00105    0.00104
O5    5    0.556702    0.665257    0.289055    11.00000    0.01167    0.02792 =
         0.02752    0.00779    0.00005   -0.00009
O6    5    0.309937    0.686953    0.269461    11.00000    0.01309    0.02472 =
         0.02508    0.00522   -0.00010    0.00065
O7    5    0.073423    0.738278    0.662820    11.00000    0.01527    0.04219 =
         0.03864   -0.02098    0.00130   -0.00185
AFIX 147
H7    2    0.146707    0.760920    0.693733    11.00000   -1.50000
AFIX   0
O8    5   -0.077041    0.542121    0.324195    11.00000    0.01305    0.03404 =
         0.03342   -0.01252    0.00289   -0.00262
AFIX 147
H8    2   -0.153868    0.555823    0.360637    11.00000   -1.50000
AFIX   0
O9    5    0.648853    0.555505    0.419964    11.00000    0.01303    0.02830 =
         0.02953    0.00923    0.00156    0.00181
AFIX 147
H9    2    0.624197    0.515566    0.471460    11.00000   -1.50000
AFIX   0
O10   5    0.472246    0.767403    0.136292    11.00000    0.01398    0.03595 =
         0.03911    0.01711   -0.00075   -0.00013
AFIX 147
H10   2    0.397099    0.786649    0.103295    11.00000   -1.50000
AFIX   0
B1    3    0.276790    0.627211    0.383363    11.00000    0.01209    0.02036 =
         0.02044   -0.00032   -0.00024    0.00102
B2    3    0.106556    0.686171    0.554749    11.00000    0.01489    0.02494 =
         0.02520   -0.00340   -0.00032    0.00069
B3    3    0.028086    0.587415    0.383762    11.00000    0.01447    0.02234 =
         0.02169   -0.00047    0.00085    0.00011
B4    3    0.533525    0.598541    0.377354    11.00000    0.01430    0.02341 =
         0.01973   -0.00057    0.00069   -0.00022
B5    3    0.442964    0.707277    0.231900    11.00000    0.01467    0.02463 =
         0.02349    0.00089   -0.00103   -0.00046
PART 1
N1    4    0.213875    0.381132    0.091715    21.00000    0.01397    0.02652 =
         0.02544   -0.00107    0.00309    0.00273
C1    1    0.306280    0.432609   -0.003806    21.00000    0.02542    0.03943 =
         0.02614   -0.00557    0.00516   -0.00484
AFIX  23
H1A   2    0.404063    0.412836    0.006217    21.00000   -1.20000
H1B   2    0.277253    0.423033   -0.103322    21.00000   -1.20000
AFIX   0
C2    1    0.303264    0.522548    0.024255    21.00000    0.03022    0.03728 =
         0.02956   -0.00604    0.00348   -0.00693
AFIX  43
H2    2    0.304754    0.541454    0.119648    21.00000   -1.20000
AFIX   0
C3    1    0.298367    0.579826   -0.083247    21.00000    0.04061    0.03464 =
         0.05920    0.00874   -0.00384   -0.01158
AFIX  93
H3A   2    0.296825    0.561874   -0.179175    21.00000   -1.20000
H3B   2    0.296517    0.637455   -0.061784    21.00000   -1.20000
AFIX   0
C4    1    0.064153    0.409624    0.082824    21.00000    0.01477    0.03981 =
         0.03767   -0.00053   -0.00089    0.00686
AFIX 137
H4A   2    0.056334    0.465667    0.122526    21.00000   -1.50000
H4B   2    0.004504    0.371523    0.136711    21.00000   -1.50000
H4C   2    0.033961    0.410269   -0.016565    21.00000   -1.50000
AFIX   0
C5    1    0.262872    0.385118    0.243179    21.00000    0.03161    0.02644 =
         0.02919    0.00257   -0.00458   -0.00390
AFIX 137
H5A   2    0.254557    0.442239    0.277997    21.00000   -1.50000
H5B   2    0.361003    0.367404    0.248804    21.00000   -1.50000
H5C   2    0.204997    0.348310    0.301475    21.00000   -1.50000
AFIX   0
C6    1    0.217986    0.293006    0.038550    21.00000    0.03090    0.02439 =
         0.04717   -0.01181   -0.00627    0.00494
AFIX 137
H6A   2    0.160787    0.257743    0.100209    21.00000   -1.50000
H6B   2    0.314995    0.272997    0.039200    21.00000   -1.50000
H6C   2    0.180851    0.290918   -0.058363    21.00000   -1.50000
AFIX   0
PART 0
PART 2
N1B   4    0.213729    0.383727    0.106271    31.00000    0.02527
C1B   1    0.314384    0.455283    0.087248    31.00000    0.02520
AFIX  23
H1BA  2    0.290711    0.499262    0.156495    31.00000   -1.20000
H1BB  2    0.410422    0.435730    0.109121    31.00000   -1.20000
AFIX   0
C2B   1    0.313421    0.490968   -0.053639    31.00000    0.02645
AFIX  43
H2B   2    0.331683    0.456510   -0.133218    31.00000   -1.20000
AFIX   0
C3B   1    0.286622    0.573503   -0.073794    31.00000    0.02329
AFIX  93
H3BA  2    0.268269    0.608345    0.005273    31.00000   -1.20000
H3BB  2    0.286345    0.596034   -0.166873    31.00000   -1.20000
AFIX   0
C4B   1    0.067279    0.408875    0.067256    31.00000    0.03187
AFIX 137
H4BA  2    0.035810    0.453191    0.130857    31.00000   -1.50000
H4BB  2    0.004710    0.360909    0.076217    31.00000   -1.50000
H4BC  2    0.065605    0.428961   -0.030806    31.00000   -1.50000
AFIX   0
C5B   1    0.220423    0.353094    0.255395    31.00000    0.03611
AFIX 137
H5BA  2    0.316187    0.335049    0.277215    31.00000   -1.50000
H5BB  2    0.155969    0.306198    0.266814    31.00000   -1.50000
H5BC  2    0.193510    0.397910    0.320116    31.00000   -1.50000
AFIX   0
C6B   1    0.261276    0.311830    0.017303    31.00000    0.02225
AFIX 137
H6BA  2    0.218292    0.260560    0.052429    31.00000   -1.50000
H6BB  2    0.363548    0.307048    0.022842    31.00000   -1.50000
H6BC  2    0.233032    0.320940   -0.081453    31.00000   -1.50000
AFIX   0
PART 0
PART 3
N1C   4    0.191122    0.384943    0.098082    41.00000    0.01954
C1C   1    0.237328    0.470432    0.056359    41.00000    0.01776
AFIX  23
H1CA  2    0.154015    0.506614    0.066084    41.00000   -1.20000
H1CB  2    0.304892    0.488637    0.129909    41.00000   -1.20000
AFIX   0
C2C   1    0.297511    0.490328   -0.073587    41.00000    0.02330
AFIX  43
H2C   2    0.315710    0.447083   -0.139518    41.00000   -1.20000
AFIX   0
C3C   1    0.331656    0.571138   -0.109726    41.00000    0.05773
AFIX  93
H3CA  2    0.314126    0.615090   -0.044979    41.00000   -1.20000
H3CB  2    0.372618    0.582643   -0.199273    41.00000   -1.20000
AFIX   0
C4C   1    0.034262    0.382775    0.100429    41.00000    0.03013
AFIX 137
H4CA  2   -0.000656    0.427147    0.162035    41.00000   -1.50000
H4CB  2    0.002767    0.328904    0.136688    41.00000   -1.50000
H4CC  2   -0.002002    0.390853    0.004099    41.00000   -1.50000
AFIX   0
C5C   1    0.234245    0.370188    0.250614    41.00000    0.01436
AFIX 137
H5CA  2    0.197976    0.415142    0.310160    41.00000   -1.50000
H5CB  2    0.336743    0.368828    0.257345    41.00000   -1.50000
H5CC  2    0.195927    0.317043    0.283068    41.00000   -1.50000
AFIX   0
C6C   1    0.240599    0.318822   -0.001784    41.00000    0.03261
AFIX 137
H6CA  2    0.233233    0.339043   -0.099513    41.00000   -1.50000
H6CB  2    0.182421    0.269107    0.009366    41.00000   -1.50000
H6CC  2    0.338493    0.305085    0.019500    41.00000   -1.50000
AFIX   0
HKLF 4


REM  2017ncs0414_4b_a.res in P2(1)/c
REM wR2 = 0.0845, GooF = S = 1.068, Restrained GooF = 1.007 for all data
REM R1 = 0.0314 for 2427 Fo > 4sig(Fo) and 0.0342 for all 2661 data
REM 271 parameters refined using 562 restraints

END

WGHT      0.0435      0.4151

REM Instructions for potential hydrogen bonds
HTAB O7 O6_$1
HTAB O8 O9_$2
HTAB O9 O4_$3
HTAB O10 O1_$4
HTAB C2 O3
HTAB C4 O8
HTAB C5 O3
EQIV $5 -x+1, y-1/2, -z+1/2
HTAB C5 O10_$5
EQIV $6 -x, y-1/2, -z+1/2
HTAB C6 O2_$6
HTAB C1B O3
HTAB C4B O8
HTAB C5B O10_$5
EQIV $7 -x, -y+1, -z+1
HTAB C5B O7_$7
EQIV $8 -x+1, -y+1, -z
HTAB C6B O10_$8
HTAB C2C O5_$8
HTAB C4C O8
HTAB C4C O7_$7
HTAB C5C O3
HTAB C5C O10_$5
HTAB C6C O2_$6
HTAB C6C O10_$8

REM Highest difference peak  0.211,  deepest hole -0.238,  1-sigma level  0.038
Q1    1   0.2133  0.5193  0.1339  11.00000  0.05    0.21
Q2    1   0.2525  0.5810 -0.1881  11.00000  0.05    0.17
Q3    1   0.4455  0.5793 -0.1173  11.00000  0.05    0.13
Q4    1  -0.0858  0.4593  0.3437  11.00000  0.05    0.13
Q5    1   0.1554  0.4975  0.3489  11.00000  0.05    0.11
;
_shelx_res_checksum                24759
_shelx_hkl_file
;
  -1   0   0    2.27    0.29
   1   0   0    2.19    0.29
  -1   0   0    1.70    0.28
  -2   0   0  130.33    4.42
   2   0   0  129.06    4.44
   2   0   0  130.06    4.20
   2   0   0  128.25    4.33
   3   0   0  594.12   18.37
  -3   0   0  608.51   18.77
   3   0   0  594.44   18.76
   3   0   0  590.47   18.56
   4   0   0  663.87   20.84
  -4   0   0  676.29   21.45
   4   0   0  673.69   21.50
   4   0   0  681.95   21.07
   5   0   0   73.90    2.64
  -5   0   0   73.22    3.56
   5   0   0   65.80    2.77
  -5   0   0   75.35    2.52
  -5   0   0   69.35    2.54
   5   0   0   69.31    2.96
  -6   0   0   55.60    2.09
  -6   0   0   58.51    2.19
   6   0   0   58.83    2.33
  -6   0   0   58.10    2.26
  -7   0   0    1.90    0.43
   7   0   0    2.33    0.60
  -7   0   0    2.85    0.59
  -8   0   0  129.82    4.59
   8   0   0  130.88    4.83
  -8   0   0  131.19    4.73
  -9   0   0   41.27    1.93
  -9   0   0   46.88    2.17
   9   0   0   46.80    2.25
 -10   0   0    2.63    0.66
 -11   0   0   29.81    1.44
  11   0   0   30.75    1.51
   0   1   0    0.06    0.15
   0  -1   0    0.06    0.18
   1   1   0  266.92    8.58
  -1  -1   0  269.08    8.59
  -1   1   0  274.09    8.41
   1   1   0  279.35    8.42
   1  -1   0  263.32    8.41
  -1  -1   0  272.14    8.41
   2   1   0    1.60    0.45
  -2   1   0    1.96    0.47
  -2  -1   0    2.22    0.51
  -2  -1   0    1.65    0.60
   2  -1   0    2.17    0.27
   2   1   0    1.45    0.57
   2  -1   0    1.84    0.21
   3  -1   0  127.68    4.10
   3   1   0  123.45    4.64
   3   1   0  124.59    4.59
   3   1   0  124.40    4.40
  -3   1   0  130.97    4.61
   3  -1   0  123.21    4.02
   4   1   0  245.96    7.69
   4   1   0  241.65    8.11
  -4   1   0  244.43    8.09
  -4  -1   0  229.64    7.14
   4   1   0  244.95    8.03
   4  -1   0  229.71    7.23
   5   1   0    8.29    0.64
  -5   1   0    7.19    1.04
   5   1   0    8.45    1.01
   5   1   0    8.21    0.86
  -5  -1   0    8.81    0.59
  -5   1   0    9.10    0.55
  -5  -1   0    8.04    0.62
   5  -1   0    9.01    0.59
  -6  -1   0  210.11    6.65
  -6  -1   0  220.20    6.89
  -6   1   0  213.48    6.85
   6   1   0  223.50    6.96
  -6   1   0  219.86    6.76
  -6  -1   0  221.77    6.82
  -7   1   0    1.07    0.36
  -7   1   0    1.52    0.39
  -7  -1   0    1.04    0.43
   7   1   0    0.80    0.52
   7  -1   0    1.57    0.57
  -7  -1   0    0.95    0.48
  -7   1   0    2.27    0.54
  -8  -1   0   26.95    1.43
  -8   1   0   25.92    1.34
   8  -1   0   26.73    1.61
   8   1   0   27.56    1.61
  -8  -1   0   26.23    1.52
  -8   1   0   26.46    1.52
  -9  -1   0    2.79    0.58
   9  -1   0    2.27    0.75
   9   1   0    2.99    0.80
  -9   1   0    3.33    0.72
  -9  -1   0    2.08    0.71
 -10  -1   0   14.82    1.00
 -10  -1   0   17.81    1.20
 -10   1   0   20.10    1.23
  10   1   0   17.94    1.25
  10  -1   0   18.47    1.26
 -11   1   0    6.02    0.67
 -11  -1   0    6.17    0.66
  11   1   0    7.41    0.72
   0  -2   0    2.57    0.47
   0   2   0    2.44    0.43
  -1   2   0   51.86    1.75
  -1  -2   0   50.55    2.18
   1   2   0   52.01    2.18
   1   2   0   52.17    1.82
  -1   2   0   51.51    1.81
  -2  -2   0  327.00   11.03
   2   2   0  333.64   10.67
  -2   2   0  344.46   10.66
   3   2   0  754.93   23.80
  -3   2   0  766.67   23.44
   3   2   0  754.22   23.39
   3   2   0  738.89   23.43
   3  -2   0  739.54   23.42
   4   2   0  639.08   19.60
  -4  -2   0  619.24   19.79
   4  -2   0  605.64   19.78
   4   2   0  625.81   19.82
  -4   2   0  642.28   19.82
   4  -2   0  606.95   18.89
  -4  -2   0  613.69   18.84
  -4  -2   0  611.67   18.86
   4   2   0  634.69   20.05
   5  -2   0   17.47    0.90
   5   2   0   18.03    1.62
   5   2   0   19.95    1.43
  -5  -2   0   19.62    1.62
  -5   2   0   17.79    1.60
   5  -2   0   19.37    1.00
   5   2   0   19.87    1.01
  -5  -2   0   18.54    0.93
  -5   2   0   19.04    0.85
  -5  -2   0   18.53    0.96
  -5  -2   0   17.48    0.89
   6   2   0   79.91    2.92
  -6  -2   0   81.37    2.84
  -6   2   0   76.19    2.70
  -6  -2   0   80.30    2.88
   6   2   0   70.72    3.80
   6  -2   0   76.04    2.79
  -7   2   0    0.59    0.31
  -7  -2   0    0.65    0.44
  -7   2   0    1.26    0.38
  -7   2   0    0.50    0.48
  -7  -2   0    0.64    0.50
   7   2   0    1.16    0.54
  -8  -2   0    1.46    0.67
  -8   2   0    1.43    0.64
   8   2   0    0.78    0.62
  -8  -2   0    1.18    0.54
  -9   2   0  127.05    4.58
  -9  -2   0  127.60    4.61
   9   2   0  124.41    4.64
  -9  -2   0  118.08    4.46
 -10  -2   0    2.93    0.67
 -10   2   0    3.38    0.66
  10   2   0    3.05    0.67
 -10  -2   0    2.19    0.52
  11   2   0    5.31    0.63
  11  -2   0    5.28    0.66
 -11   2   0    5.77    0.61
 -11  -2   0    6.31    0.65
   0   3   0   -0.11    0.46
   1  -3   0  403.64   12.20
  -1   3   0  392.70   12.20
   1   3   0  389.32   12.20
  -1  -3   0  401.53   12.21
  -1  -3   0  389.77   12.83
   1   3   0  397.08   12.82
   1  -3   0  400.08   12.38
  -1   3   0  402.03   12.35
  -2  -3   0   49.96    2.02
  -2   3   0   51.31    2.03
   2   3   0   47.35    2.00
   2  -3   0   50.71    2.02
  -2  -3   0   48.96    2.53
   3   3   0  557.72   17.80
   3  -3   0  577.83   17.83
  -3   3   0  560.14   17.80
  -3  -3   0  563.20   17.79
   3   3   0  551.11   18.41
   4  -3   0  375.63   11.55
   4   3   0  375.37   11.54
   4   3   0  369.22   12.43
   4   3   0  375.72   12.40
  -4   3   0  384.95   12.46
   4  -3   0  367.69   12.43
  -4  -3   0  378.99   12.43
  -4  -3   0  364.56   11.51
  -4  -3   0  368.14   11.53
   4   3   0  368.57   12.93
   5   3   0  486.21   14.95
   5  -3   0  491.63   14.95
  -5  -3   0  473.61   14.89
  -5  -3   0  475.18   16.16
   5   3   0  463.68   15.93
  -5   3   0  493.74   16.21
  -5  -3   0  479.58   14.89
  -5  -3   0  483.90   14.90
  -5  -3   0  462.22   14.91
   5  -3   0  493.80   14.90
   5   3   0  485.73   16.60
   6   3   0    1.99    0.46
   6  -3   0    1.02    0.43
  -6  -3   0    1.58    0.37
  -6  -3   0    1.42    0.44
   6   3   0    1.62    0.54
   6   3   0    0.85    0.69
  -6  -3   0    1.54    0.47
  -6  -3   0    1.80    0.38
   6  -3   0    1.08    0.38
  -7  -3   0   76.50    2.97
  -7   3   0   77.08    2.97
  -7  -3   0   77.27    3.01
   7  -3   0   75.72    3.04
   7   3   0   76.01    3.04
  -8  -3   0  939.90   28.86
  -8   3   0  896.85   28.58
  -8  -3   0  950.09   28.92
  -8   3   0  961.24   28.88
   8  -3   0  913.65   28.95
   8   3   0  961.85   28.97
  -9  -3   0    0.04    0.68
  -9   3   0    0.22    0.58
   9   3   0    0.36    0.61
   9  -3   0    0.33    0.61
  -9  -3   0   -0.07    0.52
 -10  -3   0   41.48    1.91
 -10   3   0   39.88    1.86
  10  -3   0   37.88    1.90
  10   3   0   40.29    1.91
 -10  -3   0   35.35    1.76
  11  -3   0   13.16    0.87
  11   3   0   12.72    0.86
 -11   3   0   11.72    0.83
 -11  -3   0   13.37    0.88
   0   4   0  719.22   22.48
  -1  -4   0  120.58    3.74
   1  -4   0  117.69    3.72
   1   4   0  114.96    3.73
  -1   4   0  111.78    3.72
  -1   4   0  112.30    4.07
   1   4   0  114.79    4.53
  -1  -4   0  115.32    4.55
   2  -4   0  148.31    4.88
   2   4   0  147.42    4.88
  -2   4   0  140.39    4.85
  -2  -4   0  145.77    4.87
  -2   4   0  142.13    4.53
   2   4   0  141.78    5.63
  -2  -4   0  146.87    5.68
  -2   4   0  141.86    4.59
   3  -4   0   32.91    1.76
  -3  -4   0   37.14    1.82
   3   4   0   34.60    1.80
   3   4   0   39.33    2.06
  -3   4   0   35.66    1.81
   3   4   0   34.11    2.33
   4  -4   0  463.90   14.32
   4   4   0  488.28   16.11
   4  -4   0  450.03   14.30
   4   4   0  465.67   14.31
  -4  -4   0  465.98   14.36
   4  -4   0  460.32   15.23
  -4  -4   0  469.63   15.24
  -4   4   0  476.57   15.26
   4   4   0  475.08   15.44
   4   4   0  459.19   15.21
  -4  -4   0  469.37   14.32
  -4  -4   0  468.34   14.36
  -4  -4   0  480.14   14.34
   4  -4   0  440.53   14.33
   5  -4   0  655.75   20.12
   5   4   0  656.54   20.11
  -5  -4   0  648.52   20.12
  -5  -4   0  636.53   21.36
   5   4   0  618.99   21.33
  -5   4   0  648.37   21.39
  -5  -4   0  661.86   20.12
  -5  -4   0  653.37   20.09
  -5  -4   0  652.17   20.12
   5   4   0  624.77   22.05
   5  -4   0  661.42   20.09
  -6  -4   0    6.59    0.63
   6   4   0    6.93    0.68
   6  -4   0    6.60    0.66
  -6  -4   0    7.30    0.69
  -6  -4   0    7.84    0.73
  -6  -4   0    6.82    0.62
   6  -4   0    6.48    0.63
  -7  -4   0  181.49    6.27
   7   4   0  196.75    6.44
   7  -4   0  192.34    6.43
  -7  -4   0  190.25    6.39
  -7  -4   0  190.95    6.45
   7  -4   0  179.38    6.30
  -8  -4   0   82.52    3.16
  -8   4   0   72.66    2.87
  -8  -4   0   80.29    3.18
  -8   4   0   80.56    3.12
   8  -4   0   74.19    3.13
   8   4   0   75.47    3.13
  -9  -4   0   13.36    1.12
  -9   4   0   11.98    1.02
   9   4   0   10.09    1.01
   9  -4   0   11.96    1.07
  -9  -4   0   12.22    1.03
  10  -4   0    1.23    0.54
  10   4   0    1.18    0.55
 -10   4   0    1.14    0.52
 -10  -4   0    0.95    0.55
 -10  -4   0    1.48    0.52
  11   4   0    1.43    0.39
  11  -4   0    1.98    0.42
 -11   4   0    1.37    0.39
 -11  -4   0    2.07    0.44
 -11  -4   0    1.81    0.36
   0   5   0    0.25    0.57
   0  -5   0    0.15    0.74
  -1   5   0    3.15    0.63
   1   5   0    1.65    0.22
  -1   5   0    2.15    0.45
  -1  -5   0    2.25    0.25
  -1   5   0    2.16    0.25
   1  -5   0    2.30    0.24
   1   5   0    2.60    0.91
  -2   5   0    2.67    0.44
   2   5   0    3.26    0.96
  -2   5   0    3.68    0.49
   2   5   0    3.58    0.46
  -2  -5   0    2.62    0.91
   2  -5   0    3.08    0.44
  -2  -5   0    3.76    0.47
  -2   5   0    4.23    0.41
  -3  -5   0  341.37   10.86
  -3  -5   0  344.58   10.79
  -3   5   0  348.21   11.38
  -3  -5   0  346.15   11.37
   3   5   0  352.74   11.40
   3  -5   0  370.23   11.42
  -3  -5   0  348.24   10.87
   3  -5   0  350.79   10.80
   4   5   0 1066.61   33.81
   4  -5   0 1072.56   31.74
   4  -5   0 1046.50   31.67
   4   5   0 1032.18   31.66
  -4  -5   0 1014.42   31.77
   4   5   0  979.65   32.55
  -4   5   0 1043.56   32.65
  -4  -5   0 1054.42   32.65
   4  -5   0 1023.88   32.61
   4   5   0  992.68   33.04
  -4  -5   0 1016.02   31.77
  -4  -5   0 1071.82   31.75
   4  -5   0 1067.71   31.75
   5  -5   0  141.14    4.72
   5   5   0  137.19    4.70
  -5  -5   0  138.58    4.76
  -5  -5   0  146.82    5.90
   5   5   0  122.91    5.88
  -5   5   0  141.65    5.86
  -5  -5   0  143.77    4.74
  -5  -5   0  145.00    4.79
  -5  -5   0  133.05    4.73
   5   5   0  129.25    6.56
   5  -5   0  148.17    4.75
  -6  -5   0   16.02    1.03
   6   5   0   15.96    1.02
   6  -5   0   17.55    1.06
  -6  -5   0   17.21    1.05
  -6  -5   0   17.19    1.09
  -6  -5   0   16.49    1.04
   6  -5   0   17.88    1.05
  -7  -5   0   83.24    3.17
  -7  -5   0   83.53    3.25
   7   5   0   80.84    3.21
   7  -5   0   82.04    3.23
  -7  -5   0   82.58    3.18
  -7  -5   0   86.01    3.30
   7  -5   0   84.41    3.21
  -8  -5   0   43.47    2.08
  -8   5   0   43.33    2.01
  -8  -5   0   39.94    2.01
   8   5   0   39.80    1.98
   8  -5   0   39.51    1.99
  -9  -5   0    1.05    0.64
  -9   5   0    1.58    0.63
  -9  -5   0    1.45    0.64
 -10  -5   0    0.72    0.48
  10  -5   0    0.57    0.46
  10   5   0    0.21    0.43
 -10   5   0    1.23    0.52
 -10  -5   0    0.63    0.51
 -11   5   0    8.74    0.65
 -11  -5   0    9.35    0.69
 -11  -5   0    8.68    0.63
   0   6   0  526.47   17.22
   1   6   0    4.80    1.02
  -1   6   0    3.99    0.73
  -1   6   0    4.47    0.62
  -2  -6   0  354.46   11.19
  -2   6   0  359.35   11.33
   2   6   0  358.88   11.30
  -2   6   0  385.73   11.41
  -2  -6   0  354.83   11.32
   2  -6   0  373.76   11.31
  -2   6   0  364.28   11.54
   2   6   0  379.18   12.87
  -2  -6   0  336.37   11.18
  -3  -6   0   64.65    2.46
  -3  -6   0   68.14    2.37
  -3  -6   0   68.87    2.85
   3  -6   0   71.31    2.85
  -3   6   0   69.91    2.86
   3   6   0   66.09    2.79
  -3  -6   0   66.08    2.47
   3  -6   0   65.47    2.37
   4  -6   0  340.85   10.29
   4   6   0  332.96   10.26
  -4  -6   0  335.07   10.45
  -4   6   0  325.74   11.22
   4  -6   0  319.12   11.16
  -4  -6   0  330.93   11.21
   4   6   0  315.99   11.78
   4   6   0  306.45   11.09
  -4  -6   0  324.94   10.34
  -4  -6   0  330.94   10.44
   4  -6   0  324.39   10.36
   4   6   0  307.38   12.42
   4  -6   0  332.50   10.37
   5   6   0    0.69    0.31
   5  -6   0    0.79    0.32
  -5  -6   0    0.46    0.39
  -5  -6   0    1.11    0.58
  -5   6   0    0.80    0.54
  -5  -6   0    0.70    0.42
  -5  -6   0    0.78    0.46
   5  -6   0    0.54    0.37
  -6  -6   0   26.21    1.41
   6  -6   0   25.85    1.35
   6   6   0   26.05    1.33
  -6  -6   0   25.68    1.40
  -6  -6   0   26.80    1.43
  -6  -6   0   26.93    1.44
   6  -6   0   27.19    1.40
  -7  -6   0   81.73    3.27
  -7  -6   0   86.18    3.34
   7  -6   0   84.39    3.29
   7   6   0   80.51    3.23
  -7  -6   0   87.01    3.33
  -7  -6   0   88.18    3.40
   7  -6   0   89.29    3.32
  -8   6   0   30.79    1.61
  -8  -6   0   29.68    1.67
  -8  -6   0   25.92    1.48
   8  -6   0   26.69    1.53
   8   6   0   26.72    1.51
  -8  -6   0   29.95    1.65
  -9  -6   0  297.18    9.74
  -9   6   0  309.80    9.70
   9  -6   0  291.68    9.66
   9   6   0  277.65    9.61
  -9  -6   0  304.39    9.75
  10  -6   0    3.95    0.55
  10   6   0    3.12    0.52
 -10   6   0    4.82    0.63
 -10  -6   0    5.50    0.69
 -10  -6   0    3.76    0.63
   0   7   0   -0.10    0.40
   0   7   0   -0.07    0.54
  -1  -7   0    3.74    0.44
   1  -7   0    4.40    0.40
  -1  -7   0    4.49    0.45
  -1  -7   0    3.77    0.41
  -1   7   0    4.56    0.68
  -1   7   0    5.81    0.89
   1   7   0    5.13    1.15
   1   7   0    4.04    0.82
   2   7   0    6.29    0.46
   2   7   0    7.06    1.02
  -2   7   0    5.50    0.47
   2   7   0    7.39    1.34
  -2   7   0    6.98    0.78
  -2  -7   0    6.45    0.49
   2  -7   0    6.26    0.47
  -2   7   0    8.13    0.71
  -2  -7   0    6.78    0.59
   2  -7   0    7.01    0.52
  -3  -7   0  737.21   22.02
  -3  -7   0  711.08   22.14
   3   7   0  684.24   22.38
  -3   7   0  699.02   22.47
  -3  -7   0  726.25   22.50
   3  -7   0  706.00   22.42
  -3  -7   0  734.81   22.16
   3  -7   0  727.68   22.03
   4  -7   0   23.32    1.06
  -4  -7   0   25.74    1.29
  -4  -7   0   23.47    1.62
   4  -7   0   22.78    1.58
  -4   7   0   22.75    1.61
  -4  -7   0   24.70    1.28
  -4  -7   0   25.22    1.19
   4  -7   0   25.24    1.21
   4  -7   0   25.25    1.22
  -4  -7   0   24.40    1.06
   5  -7   0   15.27    0.97
  -5  -7   0   14.73    1.00
   5  -7   0   15.21    0.86
  -5  -7   0   12.81    1.36
  -5  -7   0   13.35    0.99
   5  -7   0   12.53    0.94
   6  -7   0    1.09    0.51
  -6  -7   0    0.24    0.47
   6  -7   0    1.05    0.39
   6   7   0    0.58    0.36
  -6  -7   0    1.31    0.56
  -6  -7   0    1.24    0.57
  -7  -7   0   13.63    1.06
   7   7   0   13.45    0.96
   7  -7   0   12.06    0.93
  -7  -7   0   12.81    1.10
  -7  -7   0   12.62    1.12
  -7  -7   0   14.58    1.09
   7  -7   0   13.64    1.04
   8  -7   0    0.13    0.45
   8   7   0    0.75    0.44
  -8  -7   0    0.57    0.67
  -8  -7   0    0.52    0.46
  -8  -7   0    1.22    0.51
  -8   7   0    0.92    0.60
  -8  -7   0    0.39    0.64
   9   7   0    0.66    0.41
   9  -7   0    0.57    0.42
  -9  -7   0   -0.21    0.57
  -9   7   0   -0.11    0.36
  -9   7   0    0.71    0.54
  -9  -7   0   -0.04    0.60
 -10  -7   0   59.07    2.26
 -10   7   0   57.41    2.18
 -10  -7   0   58.59    2.25
   0  -8   0  767.32   23.88
   0   8   0  819.00   25.01
   0  -8   0  771.56   23.84
   0  -8   0  779.71   23.84
   0   8   0  801.55   25.60
   0  -8   0  789.39   23.84
   1  -8   0  163.24    5.34
  -1  -8   0  167.53    5.42
  -1  -8   0  161.77    5.39
  -1   8   0  169.55    6.13
   1   8   0  171.83    6.56
  -1  -8   0  167.07    5.36
   1  -8   0  159.21    5.31
  -1  -8   0  164.50    5.31
  -1   8   0  165.61    6.49
   1   8   0  167.10    7.12
   2  -8   0  174.53    5.96
  -2   8   0  187.23    6.48
   2   8   0  184.91    7.38
  -2  -8   0  186.38    5.93
  -2  -8   0  187.30    6.02
  -2   8   0  177.47    6.66
   2   8   0  183.31    8.02
  -2  -8   0  195.25    5.96
  -3  -8   0   54.74    2.23
  -3  -8   0   50.79    2.24
   3  -8   0   47.29    2.17
  -3  -8   0   58.13    2.10
  -3  -8   0   57.81    2.25
   3  -8   0   53.13    2.09
  -3  -8   0   60.67    2.06
  -4  -8   0  378.93   11.77
  -4  -8   0  376.99   11.63
  -4  -8   0  368.07   11.76
   4  -8   0  375.18   11.65
   4  -8   0  355.04   11.64
  -4  -8   0  378.72   11.46
   5  -8   0    5.54    0.68
  -5  -8   0    5.39    0.72
   5  -8   0    5.15    0.49
  -5  -8   0    6.65    0.70
  -5  -8   0    5.90    0.74
   5  -8   0    6.26    0.74
  -6  -8   0    1.02    0.56
  -6  -8   0    1.58    0.61
   6  -8   0    0.84    0.50
   6  -8   0    0.92    0.37
  -7  -8   0   13.60    1.10
   7  -8   0   12.31    0.90
  -7  -8   0   12.62    1.08
  -7  -8   0   14.38    1.17
   7  -8   0   12.64    1.02
   8  -8   0    9.57    0.90
   8  -8   0    8.41    0.77
  -8  -8   0   10.69    1.02
  -8  -8   0    8.28    0.83
  -8  -8   0   10.07    0.93
  -8   8   0    9.44    0.91
  -8  -8   0    8.75    0.98
  -9   8   0    8.22    0.67
  -9  -8   0    9.62    0.93
   9  -8   0    6.48    0.62
  -9  -8   0    8.55    0.89
  -9   8   0    9.22    0.82
 -10   8   0    7.09    0.64
 -10  -8   0    7.25    0.71
 -10  -8   0    9.06    0.74
   0  -9   0   -0.02    0.32
   0   9   0    0.53    0.69
   0   9   0   -0.23    0.50
   0  -9   0    0.45    0.31
   0  -9   0    0.10    0.30
   1  -9   0  378.77   12.80
   1  -9   0  409.42   12.87
  -1  -9   0  425.98   12.96
  -1   9   0  415.57   13.85
   1   9   0  408.75   14.34
  -1  -9   0  422.60   12.93
  -1  -9   0  424.74   12.87
   1  -9   0  416.27   12.78
  -1  -9   0  411.78   12.82
   1   9   0  409.78   15.05
  -1   9   0  423.33   14.39
  -2  -9   0    4.56    0.53
   2  -9   0    4.57    0.52
  -2  -9   0    4.81    0.44
   2  -9   0    4.08    0.45
  -2  -9   0    4.46    0.59
  -2  -9   0    4.14    0.45
  -3  -9   0   10.31    0.87
  -3  -9   0   10.44    0.72
  -3  -9   0   10.63    0.86
   3  -9   0   10.88    0.77
  -3  -9   0    9.75    0.66
   4  -9   0    6.86    0.71
  -4  -9   0    7.19    0.66
  -4  -9   0    6.02    0.76
  -4  -9   0    4.84    0.72
  -4  -9   0    6.28    0.53
   4  -9   0    6.04    0.68
   5  -9   0   31.46    1.67
  -5  -9   0   33.73    1.77
  -5  -9   0   30.39    1.73
   5  -9   0   37.13    1.75
  -5  -9   0   33.93    1.65
  -6  -9   0    6.27    0.86
  -6  -9   0    7.61    0.92
   6  -9   0    5.52    0.78
  -6  -9   0    6.72    0.83
  -7  -9   0   -0.16    0.53
   7  -9   0    0.37    0.52
  -7  -9   0    0.08    0.59
  -8  -9   0   40.49    1.97
  -8  -9   0   43.31    2.08
  -8   9   0   47.49    2.05
   8  -9   0   41.19    2.00
  -9  -9   0    9.75    0.88
  -9   9   0    8.77    0.68
  -9   9   0    9.31    0.81
  -9  -9   0   10.44    0.91
 -10  -9   0   72.13    2.60
 -10  -9   0   79.80    2.66
   0 -10   0   34.25    1.51
   0 -10   0   33.35    1.50
   0  10   0   30.51    2.29
   0 -10   0   35.47    1.56
  -1 -10   0   34.75    1.65
   1 -10   0   37.52    1.61
   1 -10   0   36.24    1.57
   1 -10   0   33.77    1.48
  -1 -10   0   35.81    1.63
  -1 -10   0   38.53    1.61
  -1 -10   0   34.54    1.53
   2 -10   0   99.76    3.72
   2 -10   0  109.47    3.78
  -2 -10   0  106.90    3.65
  -2 -10   0  111.61    3.82
  -2 -10   0  107.77    3.91
  -2 -10   0  109.39    3.71
  -3 -10   0   47.53    2.11
   3 -10   0   42.56    1.92
  -3 -10   0   45.97    1.89
  -3 -10   0   48.38    2.03
  -3 -10   0   46.91    1.85
  -4 -10   0   13.96    1.12
   4 -10   0   13.77    0.99
  -4 -10   0   14.37    0.94
  -4 -10   0   13.29    1.09
  -4 -10   0   13.44    0.80
   4 -10   0   14.09    1.05
  -5 -10   0    2.63    0.72
   5 -10   0    2.24    0.64
  -5 -10   0    3.97    0.64
  -5 -10   0    1.90    0.71
   5 -10   0    3.41    0.67
  -6 -10   0    3.09    0.67
   6 -10   0    3.68    0.73
  -6 -10   0    2.57    0.75
  -6 -10   0    3.76    0.76
  -7 -10   0   20.58    1.34
  -7 -10   0   19.12    1.39
  -7 -10   0   20.78    1.37
   7 -10   0   22.25    1.38
  -8 -10   0    9.01    0.91
  -8  10   0    8.22    0.81
  -8 -10   0    8.23    0.81
   8 -10   0    8.09    0.82
  -9  10   0    0.13    0.30
  -9  10   0    0.55    0.39
   0 -11   0    0.10    0.39
   0 -11   0   -0.06    0.42
   0 -11   0    0.08    0.36
   1 -11   0  125.77    4.38
  -1 -11   0  123.87    4.42
   1 -11   0  123.30    4.30
  -1 -11   0  131.32    4.50
  -1 -11   0  131.31    4.54
   1 -11   0  124.04    4.43
   2 -11   0  167.84    5.84
   2 -11   0  187.88    5.91
  -2 -11   0  159.74    5.67
  -2 -11   0  187.58    6.07
  -2 -11   0  176.05    5.94
  -2 -11   0  181.07    5.82
  -3 -11   0   13.56    1.09
   3 -11   0   11.69    0.92
  -3 -11   0   11.94    0.83
  -3 -11   0   12.73    0.98
  -3 -11   0   12.79    0.82
  -4 -11   0   21.33    1.44
   4 -11   0   22.89    1.33
  -4 -11   0   21.52    1.23
  -4 -11   0   21.06    1.36
  -4 -11   0   20.20    1.43
   4 -11   0   23.96    1.40
  -4 -11   0   21.44    1.10
  -5 -11   0   12.60    1.17
   5 -11   0   12.02    1.04
  -5 -11   0   11.39    0.95
  -5 -11   0   13.41    1.21
   5 -11   0    9.51    1.02
  -6 -11   0  103.17    3.87
   6 -11   0   96.80    3.88
  -6 -11   0  104.33    4.06
  -6 -11   0  101.70    4.00
  -7 -11   0   16.86    1.22
   7 -11   0   16.70    1.22
  -7 -11   0   20.63    1.41
  -7 -11   0   18.93    1.29
  -8 -11   0    5.97    0.73
   8 -11   0    4.85    0.66
  -8 -11   0    5.32    0.68
  -8  11   0    4.71    0.63
  -8 -11   0    5.19    0.73
  -9 -11   0    2.62    0.48
  -9  11   0    0.91    0.36
   0 -12   0  101.42    3.79
   0 -12   0  102.35    3.72
   0 -12   0  100.81    3.71
   1 -12   0    9.71    0.83
  -1 -12   0    9.62    0.90
   1 -12   0    8.55    0.80
   1 -12   0    8.27    0.69
  -1 -12   0    8.30    0.80
  -1 -12   0    9.12    0.84
   2 -12   0   57.71    2.32
  -2 -12   0   54.90    2.36
  -2 -12   0   57.37    2.47
  -2 -12   0   56.81    2.50
   2 -12   0   49.61    2.23
   3 -12   0    4.81    0.70
  -3 -12   0    5.98    0.80
  -3 -12   0    5.39    0.59
  -3 -12   0    5.14    0.86
   3 -12   0    6.59    0.84
  -4 -12   0    1.54    0.48
   4 -12   0    0.74    0.56
  -4 -12   0    1.25    0.66
   4 -12   0    0.80    0.66
  -4 -12   0    0.91    0.75
  -5 -12   0    4.09    0.87
   5 -12   0    3.88    0.76
  -5 -12   0    4.61    0.83
  -5 -12   0    4.45    0.68
  -5 -12   0    4.16    0.93
   5 -12   0    4.95    0.79
  -6 -12   0    1.04    0.55
   6 -12   0    0.65    0.62
  -6 -12   0   -0.13    0.77
  -6 -12   0    0.17    0.65
  -7 -12   0   34.23    1.74
   7 -12   0   35.30    1.79
  -7 -12   0   37.69    1.94
  -7 -12   0   34.93    1.83
  -8 -12   0    1.05    0.46
   8 -12   0    1.01    0.45
  -8 -12   0    0.96    0.47
  -8  12   0    0.74    0.40
  -8 -12   0    1.23    0.50
  -9 -12   0    8.27    0.64
  -9 -12   0    7.18    0.60
   0 -13   0    0.33    0.44
   0 -13   0    0.23    0.50
   0 -13   0    0.32    0.50
  -1 -13   0   61.40    2.66
  -1 -13   0   66.32    2.76
  -1 -13   0   67.68    2.82
   1 -13   0   64.83    2.70
   1 -13   0   65.89    2.67
  -2 -13   0   17.20    1.21
  -2 -13   0   17.02    1.27
   2 -13   0   15.10    1.06
  -2 -13   0   18.90    1.33
   2 -13   0   19.67    1.21
   3 -13   0   35.51    1.79
  -3 -13   0   34.90    1.85
  -3 -13   0   35.74    1.97
   3 -13   0   35.78    1.89
  -4 -13   0  119.36    4.34
   4 -13   0  110.20    4.07
  -4 -13   0  108.62    4.12
   4 -13   0  114.00    4.20
  -5 -13   0   21.75    1.33
   5 -13   0   27.39    1.61
  -5 -13   0   27.43    1.71
  -5 -13   0   25.66    1.56
  -5 -13   0   25.20    1.67
   6 -13   0   93.62    3.45
  -6 -13   0   88.56    3.42
  -6 -13   0   89.03    3.56
  -6 -13   0   86.34    3.47
  -7 -13   0    8.78    0.78
   7 -13   0    8.17    0.84
  -7 -13   0    9.70    0.89
  -7 -13   0    8.17    0.84
  -7 -13   0    8.72    0.93
  -8 -13   0   12.70    0.82
  -8 -13   0   11.86    0.90
  -8  13   0   12.46    0.77
  -8 -13   0   13.94    0.91
  -8 -13   0   10.77    0.82
   0 -14   0    2.39    0.57
   0 -14   0    2.85    0.69
   0 -14   0    3.11    0.68
  -1 -14   0    6.91    0.83
  -1 -14   0    8.47    0.96
   1 -14   0    6.17    0.78
  -1 -14   0    6.54    0.81
   1 -14   0    6.14    0.76
  -2 -14   0   13.06    1.08
  -2 -14   0   12.21    1.15
  -2 -14   0   15.22    1.24
   2 -14   0   13.51    1.04
  -3 -14   0   12.13    1.16
  -3 -14   0   10.71    1.04
   3 -14   0   10.12    0.96
  -4 -14   0   22.71    1.54
   4 -14   0   20.15    1.32
  -4 -14   0   18.83    1.34
   4 -14   0   19.76    1.39
   5 -14   0  114.74    4.02
  -5 -14   0  109.41    3.97
  -5 -14   0  114.92    4.16
  -5 -14   0  111.79    4.11
  -6 -14   0   79.06    3.06
  -6 -14   0   81.64    3.21
   6 -14   0   84.27    3.09
  -6 -14   0   80.32    3.13
  -7 -14   0   83.67    3.10
  -7 -14   0   81.28    3.20
   7 -14   0   80.97    3.08
  -7 -14   0   81.73    3.13
   0 -15   0    0.20    0.43
   0 -15   0    0.49    0.56
   0 -15   0    0.61    0.55
  -1 -15   0   17.00    1.21
  -1 -15   0   18.66    1.23
   1 -15   0   16.30    1.15
   1 -15   0   14.04    1.11
  -1 -15   0   18.56    1.34
  -2 -15   0    4.87    0.78
   2 -15   0    6.83    0.80
  -2 -15   0    6.36    0.86
   2 -15   0    5.79    0.85
  -2 -15   0    5.48    0.93
  -3 -15   0   14.93    1.17
  -3 -15   0   15.76    1.30
   3 -15   0   15.60    1.12
  -3 -15   0   17.36    1.37
   4 -15   0   23.84    1.42
  -4 -15   0   23.91    1.59
  -4 -15   0   23.20    1.44
   4 -15   0   26.43    1.53
  -5 -15   0    2.45    0.62
   5 -15   0    3.23    0.67
  -5 -15   0    2.83    0.71
  -6 -15   0   28.32    1.55
  -6 -15   0   25.97    1.38
   6 -15   0   24.68    1.37
  -6 -15   0   25.64    1.46
  -7 -15   0    4.21    0.52
  -7 -15   0    4.70    0.62
   7 -15   0    4.63    0.53
  -7 -15   0    4.35    0.56
   0 -16   0   35.97    1.72
   0 -16   0   32.61    1.69
   0 -16   0   30.08    1.72
  -1 -16   0    0.37    0.54
   1 -16   0    0.99    0.53
  -1 -16   0    0.49    0.49
   1 -16   0   -0.18    0.55
  -1 -16   0    0.33    0.55
   1 -16   0    1.02    0.47
  -2 -16   0  226.18    7.43
   2 -16   0  218.21    7.37
  -2 -16   0  214.69    7.49
   2 -16   0  215.03    7.45
  -2 -16   0  228.15    7.63
  -3 -16   0   15.80    1.11
  -3 -16   0   14.92    1.19
   3 -16   0   14.45    1.06
  -3 -16   0   15.91    1.27
   4 -16   0   14.67    1.03
  -4 -16   0   15.21    1.20
  -4 -16   0   14.37    1.03
   4 -16   0   14.10    1.08
  -5 -16   0   18.44    1.10
   5 -16   0   19.69    1.17
  -5 -16   0   18.59    1.25
  -6 -16   0    0.04    0.32
  -6 -16   0    0.17    0.44
   6 -16   0    0.29    0.37
  -6 -16   0    0.50    0.43
   0 -17   0    0.42    0.46
   0 -17   0    0.21    0.42
   0 -17   0    0.10    0.44
  -1 -17   0  113.50    3.98
   1 -17   0  109.93    3.95
  -1 -17   0  106.66    3.88
   1 -17   0  113.83    4.02
  -1 -17   0  101.41    4.05
  -2 -17   0    1.80    0.53
   2 -17   0    1.57    0.50
  -2 -17   0    1.91    0.54
  -2 -17   0    0.94    0.34
   2 -17   0    1.83    0.55
  -2 -17   0    2.21    0.65
  -3 -17   0   57.68    2.56
  -3 -17   0   59.37    2.46
   3 -17   0   68.08    2.52
  -3 -17   0   64.79    2.68
  -4 -17   0    2.05    0.57
  -4 -17   0    2.49    0.50
  -4 -17   0    2.39    0.62
  -5 -17   0    0.14    0.32
   5 -17   0   -0.19    0.41
  -5 -17   0   -0.27    0.40
   0 -18   0   10.60    0.77
   0 -18   0    9.78    0.74
   1 -18   0   38.66    1.60
  -1 -18   0   37.30    1.58
  -1 -18   0   31.87    1.45
   1 -18   0   36.20    1.61
  -1 -18   0   29.21    1.57
   2 -18   0    2.14    0.44
  -2 -18   0    2.60    0.46
   2 -18   0    1.48    0.45
  -2 -18   0    1.19    0.50
  -3 -18   0   16.20    0.90
   3 -18   0   14.12    0.91
  -3 -18   0   13.07    0.96
  -4 -18   0   -0.15    0.28
  -4 -18   0    0.63    0.39
   0 -19   0   -0.11    0.28
   1 -19   0    1.11    0.33
  -1 -19   0    1.08    0.31
   2 -19   0    4.00    0.44
  11   0  -1   -0.47    0.45
 -11   0   1   -0.20    0.37
  10   0  -1   -0.15    0.60
 -10   0   1   -0.03    0.49
  -9   0   1    0.18    0.57
  -9   0   1    0.30    0.43
  -8   0   1   -0.03    0.39
   8   0  -1   -0.44    0.64
  -8   0   1    0.10    0.55
  -8   0   1   -0.17    0.36
  -7   0   1    0.44    0.37
   7   0  -1   -0.07    0.49
  -7   0   1    0.12    0.44
  -7   0   1    0.09    0.36
  -6   0   1    0.25    0.31
   6   0  -1    0.48    0.41
  -6   0   1    0.46    0.36
  -6   0   1    0.29    0.33
  -5   0   1    0.05    0.29
   5   0  -1    0.27    0.34
  -5   0   1    0.35    0.29
  -5   0   1    0.15    0.50
   5   0  -1    0.13    0.27
   5   0  -1    0.24    0.37
  -5   0   1    0.02    0.26
   4   0  -1    0.25    0.29
   4   0  -1    0.05    0.46
  -4   0   1   -0.05    0.48
   4   0  -1   -0.04    0.42
  -4   0   1   -0.25    0.49
  -3   0   1    0.36    0.46
   3   0  -1    0.39    0.46
  -3   0   1    0.19    0.49
   3   0  -1   -0.04    0.39
   2   0  -1    0.05    0.41
   2   0  -1    0.30    0.41
  -2   0   1    0.23    0.43
  -2   0   1    0.22    0.46
  -1   0   1    0.21    0.35
  -1   0   1   -0.09    0.31
   1   0  -1   -0.02    0.27
   0   0   1   -0.06    0.22
   0   0   1    0.25    0.29
   0   0  -1    0.22    0.28
  -1   0  -1   -0.01    0.32
   1   0   1   -0.03    0.32
  -1   0  -1   -0.05    0.32
  -2   0  -1    0.44    0.39
   2   0   1    0.05    0.41
  -2   0  -1    0.48    0.48
   2   0   1    0.27    0.37
   3   0   1    0.23    0.36
   3   0   1    0.67    0.57
   3   0   1    0.60    0.50
  -3   0  -1    0.63    0.52
   4   0   1    0.34    0.31
   4   0   1   -0.06    0.45
   4   0   1   -0.05    0.49
   4   0   1    0.45    0.37
  -4   0  -1   -0.11    0.48
   5   0   1    0.24    0.34
  -5   0  -1    0.24    0.33
   5   0   1    0.34    0.33
   5   0   1    0.67    0.47
  -5   0  -1   -0.08    0.60
  -5   0  -1    0.18    0.27
  -6   0  -1   -0.06    0.32
   6   0   1   -0.08    0.43
  -6   0  -1    0.17    0.39
  -7   0  -1    0.23    0.37
   7   0   1    0.07    0.51
  -7   0  -1   -0.18    0.48
  -8   0  -1    0.95    0.46
   8   0   1    0.04    0.61
  -8   0  -1    0.43    0.64
  -9   0  -1   -0.36    0.43
   9   0   1    0.29    0.67
  -9   0  -1    0.08    0.64
  10   0   1    0.23    0.58
 -10   0  -1    0.07    0.54
  11   0   1    0.33    0.43
 -11   0  -1    0.27    0.41
  11   1  -1   13.64    0.93
 -11   1   1   13.12    0.85
 -11  -1   1   11.86    0.85
  10  -1  -1   61.58    2.67
  10   1  -1   64.62    2.68
 -10  -1   1   59.06    2.53
 -10   1   1   60.18    2.52
  -9  -1   1   -0.36    0.58
  -9   1   1    0.36    0.55
  -9  -1   1   -0.16    0.44
  -8   1   1    3.48    0.54
  -8  -1   1    3.95    0.61
   8   1  -1    3.48    0.78
   8  -1  -1    3.91    0.79
  -8  -1   1    3.62    0.69
  -8   1   1    3.39    0.68
  -8   1   1    3.72    0.55
  -7   1   1    0.41    0.32
  -7  -1   1    0.71    0.42
   7  -1  -1    0.68    0.54
   7   1  -1    0.44    0.52
  -7   1   1    0.89    0.52
  -7  -1   1    0.65    0.48
  -7  -1   1    0.24    0.32
  -7   1   1    1.36    0.42
  -6  -1   1   21.64    1.13
  -6   1   1   22.85    1.09
   6   1  -1   22.27    1.22
  -6   1   1   23.15    1.17
  -6  -1   1   23.68    1.19
  -6  -1   1   23.44    1.10
   5   1  -1  395.73   11.90
  -5   1   1  412.31   12.70
  -5  -1   1  407.17   11.17
   5   1  -1  420.94   11.33
  -5   1   1  410.33   11.16
  -5  -1   1  418.32   11.23
  -5  -1   1  412.50   11.26
  -5   1   1  413.05   11.24
   5   1  -1  437.28   12.38
   4   1  -1    2.05    0.34
   4  -1  -1    2.82    0.37
   4  -1  -1    2.98    0.41
   4   1  -1    2.58    0.66
   4   1  -1    3.59    0.70
  -4   1   1    2.59    0.65
  -4  -1   1    2.54    0.70
  -3   1   1  271.11    9.12
  -3  -1   1  283.07    9.60
   3   1  -1  290.55    9.58
   3   1  -1  285.70    9.49
  -3   1   1  287.86    9.50
   3  -1  -1  298.92    9.06
   2   1  -1  472.70   15.60
  -2  -1   1  493.62   15.66
  -2   1   1  494.08   15.28
  -2  -1   1  476.76   15.46
   2  -1  -1  514.95   15.24
   2   1  -1  498.98   15.47
  -2   1   1  495.96   15.47
  -1  -1   1  325.56   10.27
   1   1  -1  326.30   10.27
   1   1  -1  328.06   10.08
   1  -1  -1  317.39   10.07
  -1  -1   1  314.23   10.07
  -1   1   1  328.44   10.03
  -1   1   1  322.74   10.07
   0  -1   1  482.03   14.57
   0   1   1  483.70   14.40
   0  -1   1  471.36   14.40
   0   1  -1  473.41   14.55
   0   1   1  474.33   14.48
   0  -1  -1  467.90   14.47
   0   1   1  472.48   14.42
   0  -1   1  444.97   14.41
  -1  -1  -1  287.72    9.01
  -1  -1  -1  289.21    9.04
   1   1   1  295.32    9.03
   1   1   1  283.66    9.06
   1  -1   1  273.82    9.00
  -1   1  -1  292.68    9.01
  -1   1  -1  284.85    8.94
  -2   1  -1 1383.39   42.42
  -2   1  -1 1409.71   42.72
  -2  -1  -1 1422.98   42.64
  -2  -1  -1 1349.82   42.70
   2   1   1 1381.94   42.66
   2  -1   1 1443.30   42.48
   2   1   1 1400.71   42.72
   3  -1   1  454.10   13.78
   3   1   1  428.79   14.18
   3  -1   1  436.34   13.56
   3   1   1  429.17   13.86
  -3   1  -1  431.58   14.01
   3   1   1  428.63   14.02
  -4   1  -1  501.52   16.03
   4  -1   1  506.06   15.27
   4   1   1  503.91   15.71
   4   1   1  483.19   16.03
  -4  -1  -1  472.17   15.00
   4   1   1  510.78   16.11
   4  -1   1  501.10   15.46
   4   1   1  482.48   15.09
   5   1   1  103.78    3.52
  -5   1  -1  105.69    3.38
  -5  -1  -1  108.14    3.43
  -5  -1  -1   96.76    3.40
   5   1   1  112.59    4.54
   5  -1   1   93.49    3.58
  -5   1  -1  101.83    4.59
   5   1   1   96.62    4.02
   5  -1   1   88.76    3.45
   6   1   1   45.02    1.91
  -6  -1  -1   44.57    1.84
  -6   1  -1   40.63    1.81
  -6  -1  -1   41.64    1.75
  -6  -1  -1   43.81    1.78
  -6   1  -1   42.57    1.72
  -7   1  -1    1.72    0.43
  -7  -1  -1    1.30    0.46
   7  -1   1    2.23    0.63
   7   1   1    1.37    0.57
  -7   1  -1    1.54    0.58
  -7  -1  -1    1.37    0.54
  -8   1  -1  627.29   20.12
  -8  -1  -1  627.58   20.21
   8   1   1  671.34   20.44
   8  -1   1  651.34   20.42
  -8  -1  -1  668.24   20.36
  -8   1  -1  660.81   20.35
  -9   1  -1    1.59    0.45
  -9  -1  -1    1.19    0.53
   9   1   1    1.29    0.70
   9  -1   1    0.59    0.69
  -9  -1  -1    0.87    0.65
  -9   1  -1    1.44    0.71
 -10  -1  -1   -0.24    0.40
  10   1   1    0.67    0.59
  10  -1   1    1.12    0.62
 -10   1  -1    0.20    0.57
 -10  -1  -1    0.38    0.57
  11   1   1   77.08    2.96
 -11  -1  -1   79.14    2.92
 -11   1  -1   78.58    2.91
  11   2  -1   30.06    1.46
  11  -2  -1   30.07    1.46
 -11   2   1   27.84    1.34
 -11  -2   1   30.64    1.40
 -10  -2   1    0.28    0.40
  10   2  -1    0.80    0.57
 -10   2   1    0.15    0.47
 -10  -2   1   -0.06    0.53
  -9  -2   1    5.40    0.72
  -9  -2   1    3.69    0.73
  -9   2   1    3.68    0.68
   9   2  -1    4.51    0.80
  -8  -2   1    3.62    0.67
   8   2  -1    2.90    0.70
  -8  -2   1    2.37    0.67
  -8   2   1    2.85    0.66
  -8   2   1    3.00    0.53
  -7  -2   1   15.15    1.02
   7   2  -1   15.52    1.11
  -7  -2   1   16.27    1.08
  -7   2   1   14.87    1.04
  -7  -2   1   16.38    0.90
  -7   2   1   15.48    0.98
  -6  -2   1  208.75    6.46
   6   2  -1  216.46    6.69
  -6  -2   1  209.63    6.59
  -6  -2   1  199.76    6.59
  -6   2   1  201.94    6.57
   5   2  -1  104.83    4.36
  -5   2   1  103.31    4.70
  -5  -2   1  103.69    4.71
  -5  -2   1  113.13    3.60
   5  -2  -1  106.35    3.71
   5   2  -1  110.27    3.72
  -5  -2   1  109.12    3.66
  -5  -2   1  103.81    3.67
  -5  -2   1  105.82    3.62
   5   2  -1  111.97    4.80
   5  -2  -1  105.94    3.68
   4   2  -1  356.34   10.91
   4  -2  -1  354.33   10.90
   4   2  -1  357.80   11.86
  -4   2   1  358.43   11.81
   4  -2  -1  349.93   11.81
  -4  -2   1  353.16   11.77
  -4  -2   1  345.72   10.87
  -4  -2   1  341.52   10.86
  -4  -2   1  334.00   12.07
   4   2  -1  371.88   12.07
  -3   2   1   49.66    1.83
  -3  -2   1   50.43    2.64
   3   2  -1   56.38    2.64
  -3   2   1   52.71    2.38
   3   2  -1   58.99    2.46
   3  -2  -1   51.69    1.76
   3  -2  -1   58.47    2.44
  -2  -2   1 1360.15   43.54
  -2   2   1 1426.97   42.85
   2   2  -1 1424.71   43.16
   2  -2  -1 1390.77   42.79
  -2   2   1 1480.29   43.16
  -1  -2   1  343.26   10.95
   1   2  -1  338.43   10.93
   1   2  -1  335.23   10.56
  -1   2   1  337.27   10.52
   1  -2  -1  338.59   10.51
  -1   2   1  343.22   10.56
   0  -2   1  822.99   25.66
   0   2  -1  802.57   25.64
   0   2   1  828.20   25.38
   0   2   1  864.15   25.35
   0   2   1  832.34   25.51
   1  -2   1 3422.25  101.64
  -1   2  -1 3385.82  101.57
  -1   2  -1 3367.31  101.57
   1   2   1 3356.75  101.58
  -1  -2  -1 3298.15  101.73
   1   2   1 3361.29  101.74
   2  -2   1    0.90    0.35
   2   2   1    0.84    0.42
  -2   2  -1    0.70    0.43
  -2   2  -1    1.23    0.31
   3  -2   1  110.63    3.69
   3   2   1  109.19    4.57
   3   2   1  113.26    4.23
   3   2   1  109.80    4.24
   3  -2   1  110.80    4.23
  -3   2  -1  118.72    4.28
  -4  -2  -1   22.48    0.92
  -4  -2  -1   23.18    1.55
  -4   2  -1   23.16    1.57
   4   2   1   22.63    1.44
   4  -2   1   22.18    1.54
   4   2   1   22.61    1.55
   4   2   1   23.16    1.74
   4  -2   1   20.10    0.93
   4   2   1   22.46    0.96
   5  -2   1  248.34    7.98
   5   2   1  248.53    7.98
  -5   2  -1  242.67    7.80
  -5  -2  -1  249.75    7.89
  -5  -2  -1  248.32    7.86
  -5  -2  -1  255.54    7.93
   5   2   1  241.53    9.28
  -5   2  -1  253.03    9.23
  -5  -2  -1  257.13    9.24
   5   2   1  244.15    8.78
  -6  -2  -1   22.08    1.12
  -6   2  -1   21.33    1.02
   6   2   1   21.38    1.19
  -6  -2  -1   22.41    1.11
  -7  -2  -1  480.79   15.29
  -7   2  -1  479.50   15.26
   7   2   1  494.99   15.37
  -7  -2  -1  490.50   15.24
  -7   2  -1  479.05   15.08
  -8  -2  -1  220.71    7.18
  -8   2  -1  209.21    7.12
   8   2   1  219.12    7.22
  -8  -2  -1  209.87    7.07
  -8   2  -1  196.68    6.84
  -9  -2  -1    0.42    0.65
  -9   2  -1    0.26    0.65
   9   2   1    0.74    0.67
  -9  -2  -1    0.50    0.51
 -10  -2  -1   47.50    2.13
 -10   2  -1   49.21    2.13
  10   2   1   44.83    2.12
 -10  -2  -1   42.37    1.96
  11   2   1    5.24    0.60
  11  -2   1    5.13    0.61
 -11   2  -1    5.67    0.60
 -11  -2  -1    4.73    0.60
  11   3  -1    0.62    0.39
  11  -3  -1    0.90    0.40
 -11   3   1    0.55    0.33
 -11  -3   1    0.68    0.36
 -10  -3   1   13.16    0.97
 -10  -3   1   14.24    1.05
 -10   3   1   12.74    0.98
  10  -3  -1   15.71    1.13
  10   3  -1   14.69    1.08
  -9  -3   1  123.55    4.56
   9   3  -1  121.22    4.63
   9  -3  -1  121.18    4.67
  -9  -3   1  135.18    4.65
  -9   3   1  132.71    4.59
  -9   3   1  120.39    4.30
  -8  -3   1   24.02    1.42
   8  -3  -1   24.27    1.50
   8   3  -1   24.61    1.50
  -8   3   1   25.06    1.41
  -8  -3   1   23.36    1.45
  -8   3   1   22.08    1.26
  -7  -3   1  132.77    4.67
   7   3  -1  136.95    4.75
   7  -3  -1  129.56    4.72
  -7  -3   1  136.73    4.71
  -7   3   1  130.88    4.63
  -7  -3   1  126.58    4.42
   6   3  -1   13.94    1.61
   6  -3  -1   14.34    0.96
   6   3  -1   16.04    0.99
  -6  -3   1   15.85    0.96
  -6  -3   1   14.83    0.95
  -6  -3   1   16.11    0.92
   6  -3  -1   14.73    0.94
  -5  -3   1    3.64    0.79
   5   3  -1    5.14    1.01
   5   3  -1    3.44    0.74
  -5   3   1    3.91    0.84
  -5  -3   1    2.91    0.38
  -5  -3   1    3.41    0.39
   5  -3  -1    3.42    0.47
   5   3  -1    2.91    0.43
  -5  -3   1    3.87    0.47
  -5  -3   1    2.98    0.46
  -5  -3   1    3.52    0.44
   5  -3  -1    3.40    0.47
   4  -3  -1    1.86    0.33
   4   3  -1    1.79    0.33
   4   3  -1    1.40    0.54
  -4  -3   1    1.16    0.56
  -4   3   1    1.84    0.58
  -4  -3   1    1.63    0.80
   4   3  -1    1.23    0.76
   4  -3  -1    1.75    0.56
  -4  -3   1    1.31    0.34
   4  -3  -1    1.76    0.35
  -4  -3   1    1.39    0.33
  -3  -3   1  701.68   22.24
   3  -3  -1  720.74   22.27
   3   3  -1  711.74   22.28
  -3   3   1  725.93   22.28
   3   3  -1  695.88   22.81
  -3  -3   1  690.12   22.83
   2  -3  -1    7.32    0.47
   2   3  -1    6.55    0.66
  -2  -3   1    7.75    1.05
  -2   3   1    7.45    0.48
  -2  -3   1    7.00    0.67
   2  -3  -1    7.29    0.67
  -2   3   1    6.86    0.67
   1  -3  -1  387.45   12.08
   1   3  -1  379.00   12.09
  -1  -3   1  393.23   12.09
   1  -3  -1  394.21   12.14
  -1   3   1  401.43   12.15
  -1   3   1  391.75   12.09
   1   3  -1  384.46   12.64
  -1  -3   1  379.07   12.70
   0   3   1  822.50   24.60
   0  -3   1  813.08   24.63
   0  -3   1  821.06   24.60
   0   3   1  792.19   24.63
   0   3   1  802.67   24.88
   0   3  -1  794.33   25.06
   1   3   1  785.81   24.43
  -1   3  -1  790.33   24.43
   1   3   1  789.64   24.73
  -1  -3  -1  810.35   24.44
   1  -3   1  822.65   24.44
   1   3   1  793.42   25.09
   1  -3   1  813.29   24.66
  -1   3  -1  787.21   24.57
   2   3   1    4.62    0.58
   2  -3   1    5.77    0.55
  -2   3  -1    5.22    0.46
   2  -3   1    4.85    0.59
  -2  -3  -1    4.75    0.61
  -2   3  -1    4.36    0.60
   3  -3   1   33.51    1.74
  -3  -3  -1   31.32    1.69
  -3   3  -1   32.83    1.74
   3   3   1   33.75    1.73
   3   3   1   35.28    1.87
   3   3   1   32.37    2.14
   3  -3   1   28.19    1.09
   4   3   1 1676.14   52.03
   4   3   1 1663.81   50.35
   4  -3   1 1665.06   50.36
  -4  -3  -1 1657.05   50.32
  -4  -3  -1 1657.23   50.37
  -4  -3  -1 1657.29   50.32
   4   3   1 1637.71   51.32
  -4  -3  -1 1724.27   51.38
   4  -3   1 1621.98   51.32
   4   3   1 1712.31   51.38
  -4   3  -1 1670.06   51.37
   5  -3   1  129.73    4.31
   5   3   1  127.53    4.30
  -5  -3  -1  123.62    4.23
  -5  -3  -1  128.54    4.25
  -5  -3  -1  125.88    5.41
  -5   3  -1  125.58    5.41
   5   3   1  122.60    5.21
   5   3   1  120.54    5.78
   5  -3   1  121.90    4.15
  -5  -3  -1  130.49    4.30
   6   3   1   15.31    1.80
  -6  -3  -1   19.36    1.01
  -6  -3  -1   19.46    1.07
   6  -3   1   19.27    1.12
   6   3   1   19.17    1.11
  -6  -3  -1   18.69    1.05
  -7  -3  -1  175.53    5.89
   7  -3   1  173.11    5.98
   7   3   1  173.53    5.97
  -7   3  -1  175.34    5.91
  -7  -3  -1  165.23    5.81
  -8   3  -1   36.42    1.83
  -8  -3  -1   37.03    1.89
   8   3   1   35.91    1.87
   8  -3   1   35.13    1.87
  -8  -3  -1   36.49    1.81
  -9   3  -1    1.08    0.67
  -9  -3  -1    1.67    0.71
   9   3   1    1.68    0.67
   9  -3   1    0.65    0.63
  -9  -3  -1    1.67    0.61
 -10   3  -1   18.86    1.22
 -10  -3  -1   18.69    1.23
  10  -3   1   18.06    1.22
  10   3   1   19.05    1.24
 -10  -3  -1   18.82    1.14
 -11  -3  -1    6.18    0.61
 -11   3  -1    6.22    0.61
  11  -3   1    4.75    0.57
  11   3   1    5.79    0.59
 -11  -4   1   12.52    0.80
  11   4  -1   11.08    0.76
  11  -4  -1   13.21    0.79
  10  -4  -1    2.19    0.59
  10   4  -1    1.79    0.56
 -10  -4   1    2.00    0.53
 -10   4   1    2.18    0.53
 -10  -4   1    1.66    0.60
  -9  -4   1  218.56    7.50
   9   4  -1  220.11    7.55
   9  -4  -1  224.90    7.60
  -9  -4   1  234.56    7.56
  -9   4   1  223.25    7.47
  -9   4   1  214.56    7.24
  -8  -4   1  664.91   20.82
   8  -4  -1  674.90   20.89
   8   4  -1  664.26   20.87
  -8  -4   1  685.44   20.85
  -8   4   1  650.21   20.74
  -8   4   1  653.36   20.65
   7  -4  -1   29.96    1.59
   7   4  -1   31.74    1.60
  -7  -4   1   30.73    1.58
  -7  -4   1   27.53    1.56
  -7   4   1   30.47    1.53
  -7  -4   1   29.86    1.34
  -6  -4   1   17.54    0.92
  -6  -4   1   15.69    0.94
   6   4  -1   17.11    1.06
   6  -4  -1   17.96    1.07
  -6  -4   1   17.03    1.06
  -6  -4   1   18.24    1.10
  -6  -4   1   18.56    1.05
   6  -4  -1   18.84    1.11
  -5  -4   1    1.93    0.65
   5   4  -1    2.50    0.92
  -5   4   1    3.61    0.80
   5   4  -1    2.57    0.76
  -5  -4   1    2.04    0.38
   5   4  -1    2.72    0.42
   5  -4  -1    3.03    0.44
  -5  -4   1    2.29    0.44
  -5  -4   1    2.77    0.47
  -5  -4   1    2.29    0.42
   5  -4  -1    3.15    0.49
  -5  -4   1    2.80    0.37
   4  -4  -1  648.21   20.65
  -4  -4   1  648.16   20.64
  -4   4   1  658.24   20.68
   4   4  -1  622.44   20.60
  -4  -4   1  614.31   19.70
   4  -4  -1  646.53   19.69
   4   4  -1  646.42   19.69
  -4  -4   1  644.16   19.71
  -4  -4   1  655.12   19.74
   4   4  -1  667.06   21.48
  -4  -4   1  616.84   21.51
   4  -4  -1  668.72   19.74
  -4  -4   1  625.26   19.70
   3  -4  -1   29.85    1.63
  -3  -4   1   28.90    1.61
  -3   4   1   28.53    1.61
   3   4  -1   30.27    1.65
  -3  -4   1   28.22    2.20
   3   4  -1   30.80    2.16
   2   4  -1   96.65    3.65
  -2   4   1  103.31    3.47
  -2  -4   1  101.17    3.68
   2  -4  -1  104.79    3.69
  -2   4   1  104.86    3.69
  -2  -4   1   99.65    4.41
   2   4  -1   99.65    4.34
  -2   4   1  106.56    3.63
   1  -4  -1    0.47    0.27
  -1  -4   1    0.28    0.31
  -1  -4   1   -0.32    0.79
   1   4  -1    0.50    0.70
  -1   4   1    0.14    0.56
  -1   4   1    0.63    0.38
   1   4  -1    0.03    0.25
  -1   4   1    0.41    0.28
   0  -4   1  165.05    5.35
   0   4   1  167.70    5.36
   0  -4   1  171.79    5.33
   0   4   1  171.46    5.34
   0   4   1  170.03    5.76
   0   4   1  179.04    6.15
   0   4  -1  169.25    5.99
  -1  -4  -1 2219.90   66.57
  -1   4  -1 2164.05   66.57
   1   4   1 2179.86   67.02
   1   4   1 2184.28   66.55
   1  -4   1 2190.55   66.55
  -1   4  -1 2224.74   66.89
   1   4   1 2245.41   67.48
   1  -4   1 2278.37   67.02
   2   4   1   57.74    2.35
  -2   4  -1   56.67    2.19
  -2  -4  -1   58.73    2.36
   2   4   1   59.02    2.69
  -2   4  -1   56.36    2.34
   2  -4   1   57.94    2.34
   2   4   1   57.67    3.07
   2  -4   1   62.10    2.34
  -3   4  -1  784.98   24.63
   3   4   1  788.87   24.95
   3  -4   1  792.59   24.65
  -3  -4  -1  793.27   24.63
   3   4   1  769.26   24.61
   3   4   1  798.34   25.58
   4  -4   1    6.97    0.50
   4   4   1    6.24    0.51
   4  -4   1    6.72    0.52
  -4  -4  -1    6.23    0.51
  -4  -4  -1    6.98    0.56
  -4  -4  -1    6.92    0.58
   4  -4   1    7.07    0.58
  -4  -4  -1    6.85    0.52
  -4  -4  -1    8.64    0.99
  -4   4  -1    7.80    0.97
   4   4   1    6.25    0.85
   4  -4   1    5.96    0.86
   4   4   1   10.11    1.13
   4   4   1    5.74    1.20
   5  -4   1   84.98    3.10
   5   4   1   86.23    3.10
  -5  -4  -1   88.46    4.18
   5   4   1   82.53    4.12
  -5   4  -1   88.50    4.17
  -5  -4  -1   89.15    3.09
  -5  -4  -1   89.07    3.11
   5   4   1   87.66    4.76
   5  -4   1   81.06    2.99
  -5  -4  -1   90.27    3.15
  -6  -4  -1   11.44    0.83
  -6  -4  -1   11.72    0.82
   6   4   1   10.09    0.81
   6  -4   1   11.84    0.86
   6  -4   1   10.65    0.74
  -6  -4  -1    9.57    0.78
  -7  -4  -1  344.04   10.67
   7   4   1  336.53   10.71
   7  -4   1  322.47   10.70
  -7  -4  -1  323.60   10.56
  -7  -4  -1  325.39   10.64
  -8   4  -1   65.76    2.71
   8  -4   1   60.87    2.69
   8   4   1   62.23    2.68
  -8  -4  -1   61.68    2.64
  -9   4  -1    4.88    0.81
   9  -4   1    4.40    0.76
   9   4   1    4.95    0.77
  -9  -4  -1    4.97    0.76
 -10  -4  -1    5.47    0.75
 -10   4  -1    5.96    0.71
 -10  -4  -1    4.96    0.67
  11   4   1    0.23    0.31
  11  -4   1    0.08    0.32
 -11   4  -1    0.23    0.35
 -11  -4  -1    0.35    0.35
 -11  -4  -1    0.31    0.28
 -11  -5   1    3.49    0.45
 -10  -5   1   13.95    0.98
 -10   5   1   11.06    0.87
 -10  -5   1   14.08    0.99
  10   5  -1   11.47    0.90
  10  -5  -1   12.82    0.95
  -9  -5   1   39.67    1.96
  -9   5   1   40.87    1.76
  -9   5   1   39.30    1.88
  -9  -5   1   36.91    1.93
   9  -5  -1   39.44    1.94
   9   5  -1   38.01    1.91
  -8   5   1    4.14    0.68
  -8  -5   1    4.09    0.79
   8  -5  -1    4.25    0.71
   8   5  -1    2.67    0.64
  -8  -5   1    3.83    0.78
   7  -5  -1  203.44    6.75
   7   5  -1  200.94    6.73
  -7  -5   1  192.11    6.72
  -7   5   1  200.03    6.66
  -7  -5   1  197.71    6.70
  -7  -5   1  197.01    6.75
   7  -5  -1  194.98    6.74
   6   5  -1    2.31    0.48
   6  -5  -1    2.75    0.53
  -6  -5   1    1.76    0.44
  -6  -5   1    2.76    0.58
  -6  -5   1    1.69    0.47
  -6  -5   1    1.69    0.52
   6  -5  -1    2.02    0.52
  -6  -5   1    1.90    0.36
   5  -5  -1    1.57    0.37
   5   5  -1    2.16    0.39
  -5  -5   1    1.08    0.38
  -5  -5   1    0.24    0.48
  -5   5   1    1.04    0.54
  -5  -5   1    1.28    0.42
  -5  -5   1    0.96    0.40
  -5  -5   1    1.83    0.44
  -5  -5   1    0.85    0.29
   5  -5  -1    1.09    0.38
   4   5  -1   26.33    2.30
  -4  -5   1   25.65    2.39
   4  -5  -1   28.09    1.24
  -4  -5   1   27.47    1.15
   4  -5  -1   27.05    1.17
   4   5  -1   26.46    1.16
  -4  -5   1   27.47    1.25
   4  -5  -1   25.67    1.19
  -4  -5   1   26.73    1.23
  -4  -5   1   28.62    1.27
   4  -5  -1   27.45    1.77
  -4  -5   1   28.26    1.79
  -4   5   1   25.87    1.76
   4   5  -1   25.05    1.71
  -3  -5   1   48.42    3.12
   3  -5  -1   47.40    1.77
   3   5  -1   45.21    2.94
  -3  -5   1   45.23    1.74
  -3  -5   1   47.28    1.80
  -3  -5   1   46.17    1.76
  -3  -5   1   47.14    1.79
   3  -5  -1   47.44    2.22
   3   5  -1   48.45    2.23
  -3   5   1   49.13    2.25
  -3  -5   1   49.96    2.25
  -2   5   1  345.38   11.17
  -2  -5   1  353.43   11.29
   2  -5  -1  361.91   11.30
  -2   5   1  357.67   11.30
   2   5  -1  351.64   11.28
  -2  -5   1  347.37   12.41
  -2   5   1  370.35   11.41
   2   5  -1  351.96   12.32
   1  -5  -1  444.65   13.78
  -1   5   1  436.52   14.12
   1   5  -1  442.33   13.77
  -1  -5   1  448.13   13.77
  -1   5   1  459.03   13.79
  -1   5   1  450.81   14.50
   1   5  -1  442.03   14.83
   0   5   1    7.20    0.95
   0  -5   1    7.71    0.40
   0   5   1    7.73    0.40
   0  -5   1    6.89    0.40
   0   5   1    6.93    0.74
   0   5  -1    8.38    1.01
   0   5   1    7.00    0.39
   0  -5   1    7.20    1.06
  -1   5  -1    0.25    0.26
   1  -5   1    0.32    0.59
   1   5   1    0.27    0.24
   1   5   1    0.07    0.75
  -1   5  -1    0.20    0.47
  -1  -5  -1    0.46    0.28
   1   5   1    0.49    0.57
   1  -5   1    0.14    0.22
  -2  -5  -1  384.36   12.29
   2   5   1  383.06   12.85
  -2   5  -1  391.34   12.29
   2   5   1  375.64   12.25
   2  -5   1  388.16   12.28
  -2   5  -1  383.06   12.25
   2  -5   1  404.20   12.47
   2   5   1  394.14   13.47
  -3  -5  -1  241.68    7.62
  -3  -5  -1  239.81    7.70
  -3  -5  -1  239.00    7.72
   3  -5   1  236.75    7.64
  -3  -5  -1  245.73    7.64
   3   5   1  240.83    8.26
  -3  -5  -1  261.55    8.34
  -3   5  -1  246.99    8.29
   3  -5   1  252.96    8.29
   4  -5   1  123.10    3.96
   4   5   1  124.35    5.85
  -4  -5  -1  117.20    4.80
  -4   5  -1  119.72    4.82
   4   5   1  116.50    5.12
   4   5   1  112.21    4.73
   4  -5   1  111.24    4.73
   4  -5   1  121.03    3.96
   4   5   1  115.66    3.93
  -4  -5  -1  117.37    4.03
  -4  -5  -1  116.52    3.96
   4  -5   1  115.83    3.99
  -4  -5  -1  120.56    4.06
   5  -5   1  241.29    7.66
   5   5   1  242.24    7.70
   5  -5   1  232.63    7.69
  -5   5  -1  222.88    8.87
  -5  -5  -1  228.21    8.89
  -5  -5  -1  242.15    7.71
  -5  -5  -1  248.22    7.78
  -5  -5  -1  238.02    7.71
  -5  -5  -1  234.81    7.78
  -6  -5  -1  278.80    9.04
  -6  -5  -1  287.96    9.09
   6  -5   1  273.45    9.04
   6   5   1  275.03    9.03
   6  -5   1  284.89    8.97
  -6  -5  -1  275.71    9.10
  -7  -5  -1   20.62    1.22
   7  -5   1   17.57    1.15
   7   5   1   17.69    1.15
  -7  -5  -1   16.99    1.16
  -7  -5  -1   17.34    1.11
   7  -5   1   15.49    1.02
  -8  -5  -1   29.23    1.62
   8  -5   1   28.45    1.60
   8   5   1   29.07    1.59
  -8   5  -1   31.67    1.65
  -8  -5  -1   25.97    1.49
  -9   5  -1    0.61    0.63
   9   5   1    1.58    0.57
   9  -5   1    1.06    0.56
  -9  -5  -1    1.68    0.62
 -10   5  -1   17.30    1.11
  10   5   1   15.38    1.04
  10  -5   1   15.78    1.05
 -10  -5  -1   17.49    1.11
 -11   5  -1    1.97    0.40
 -11  -5  -1    1.24    0.34
  10  -6  -1    0.54    0.39
  10   6  -1    0.58    0.37
 -10  -6   1    0.72    0.49
 -10   6   1    1.19    0.42
 -10  -6   1    0.59    0.47
  -9  -6   1   15.84    1.18
  -9   6   1   15.32    0.98
   9  -6  -1   15.28    1.10
   9   6  -1   14.03    1.06
  -9   6   1   15.95    1.08
  -9  -6   1   15.46    1.18
  -8  -6   1   43.46    2.14
  -8  -6   1   44.18    2.16
  -8   6   1   43.11    2.03
   8   6  -1   45.47    2.08
   8  -6  -1   46.28    2.11
  -7  -6   1   22.55    1.39
  -7  -6   1   20.99    1.24
  -7  -6   1   21.82    1.40
  -7  -6   1   21.85    1.34
   7  -6  -1   24.05    1.41
   6  -6  -1   55.29    2.34
   6   6  -1   56.55    2.34
  -6  -6   1   58.11    2.39
  -6  -6   1   58.90    2.44
  -6  -6   1   58.91    2.47
  -6  -6   1   57.53    2.45
   6  -6  -1   58.27    2.45
  -6  -6   1   63.95    2.25
   5   6  -1   56.92    2.16
   5  -6  -1   56.56    2.16
  -5  -6   1   53.61    2.22
  -5  -6   1   53.69    3.07
  -5   6   1   50.13    3.00
  -5  -6   1   53.17    2.22
  -5  -6   1   55.11    2.28
  -5  -6   1   56.12    2.26
   5  -6  -1   55.60    2.27
  -5  -6   1   59.02    2.11
  -4  -6   1  199.39    6.31
   4  -6  -1  203.78    6.44
  -4  -6   1  190.19    8.56
   4   6  -1  196.43    8.44
   4   6  -1  195.83    6.30
   4  -6  -1  202.31    6.31
  -4  -6   1  198.83    6.45
  -4   6   1  195.77    7.23
   4  -6  -1  192.45    7.17
  -4  -6   1  200.77    7.23
   4   6  -1  172.18    7.03
  -4  -6   1  193.66    6.42
  -4  -6   1  198.09    6.47
   4  -6  -1  194.03    6.36
   3  -6  -1   32.33    1.33
  -3  -6   1   32.79    1.43
  -3   6   1   35.70    1.81
  -3  -6   1   36.47    1.81
   3   6  -1   31.86    1.73
   3  -6  -1   36.36    1.80
  -3  -6   1   33.24    1.38
  -3  -6   1   33.53    1.41
  -3  -6   1   33.41    1.45
   3  -6  -1   32.64    1.40
  -3  -6   1   35.53    2.77
  -3  -6   1   35.23    1.36
  -2  -6   1   91.28    3.14
   2   6  -1   89.38    3.28
  -2  -6   1   93.25    3.31
   2  -6  -1   94.45    3.31
  -2   6   1   91.43    3.32
  -2   6   1   94.29    3.38
   2   6  -1   90.78    4.43
  -2  -6   1   91.61    4.53
  -2   6   1   93.97    3.61
  -2  -6   1   87.52    3.08
  -2  -6   1   90.20    3.14
   1   6  -1   15.51    1.57
  -1   6   1   16.61    1.38
  -1   6   1   16.30    0.75
  -1   6   1   15.83    0.73
  -1  -6   1   16.27    0.72
  -1   6   1   18.58    1.20
  -1  -6   1   16.60    0.74
   0   6  -1  575.91   18.85
   0   6   1  591.96   19.02
   0  -6   1  605.01   19.06
   0   6   1  560.89   18.45
   1  -6   1   11.53    1.18
  -1   6  -1   10.83    1.04
   1  -6   1   10.30    0.55
   1  -6   1   11.60    0.57
   1   6   1   11.65    0.56
   1   6   1   12.53    1.17
   1   6   1   11.33    0.58
  -2  -6  -1  157.67    5.30
  -2   6  -1  165.70    5.53
  -2  -6  -1  165.02    5.54
   2   6   1  163.76    6.32
   2   6   1  161.52    5.49
   2  -6   1  169.85    5.51
   2  -6   1  150.30    5.20
  -2   6  -1  176.32    5.75
   2  -6   1  186.43    6.02
   2   6   1  181.19    7.07
  -3  -6  -1   41.08    1.92
  -3   6  -1   38.51    1.87
   3  -6   1   39.53    1.87
   3   6   1   39.47    1.86
  -3  -6  -1   40.21    1.40
  -3  -6  -1   39.38    1.50
  -3  -6  -1   40.99    1.43
   3  -6   1   40.04    1.44
  -3  -6  -1   39.88    1.54
  -4  -6  -1    1.37    0.42
   4  -6   1    0.84    0.47
   4   6   1    1.63    0.50
  -4  -6  -1    0.55    0.45
  -4   6  -1    1.33    0.52
   4   6   1    1.72    0.95
   4   6   1    0.99    0.74
  -4  -6  -1    1.46    0.37
  -4  -6  -1    1.66    0.44
  -4  -6  -1    2.08    0.40
   4   6   1    1.19    0.30
   4  -6   1    0.98    0.29
   5  -6   1    4.69    0.50
   5   6   1    3.95    0.48
  -5  -6  -1    4.58    0.61
  -5  -6  -1    4.39    0.86
  -5   6  -1    3.64    0.80
  -5  -6  -1    4.73    0.62
  -5  -6  -1    4.16    0.56
   5  -6   1    4.80    0.54
  -6  -6  -1   33.18    1.60
  -6  -6  -1   34.44    1.66
   6   6   1   30.78    1.52
   6  -6   1   31.76    1.54
   6  -6   1   34.67    1.57
  -6  -6  -1   31.23    1.64
  -7  -6  -1    0.53    0.49
   7   6   1    0.03    0.41
   7  -6   1    0.86    0.44
  -7  -6  -1    0.48    0.59
  -7  -6  -1    0.55    0.47
   7  -6   1   -0.15    0.40
  -8  -6  -1   34.20    1.79
   8  -6   1   31.24    1.68
   8   6   1   31.38    1.65
  -8  -6  -1   32.69    1.65
  -8   6  -1   35.97    1.79
  -8  -6  -1   29.69    1.64
  -9  -6  -1    1.84    0.63
   9  -6   1    0.70    0.48
   9   6   1    1.44    0.51
  -9   6  -1    1.42    0.66
 -10  -6  -1    9.76    0.81
  10  -6   1    7.56    0.69
  10   6   1    6.89    0.67
 -10   6  -1    8.71    0.78
 -10  -7   1   50.70    1.93
 -10   7   1   37.88    1.69
 -10  -7   1   47.89    1.88
  -9   7   1    3.44    0.54
   9   7  -1    3.15    0.55
   9  -7  -1    3.04    0.56
  -9   7   1    4.10    0.61
  -9  -7   1    3.18    0.70
  -9  -7   1    3.90    0.74
  -8  -7   1  131.67    4.78
  -8  -7   1  125.65    4.67
  -8  -7   1  134.35    4.77
  -8   7   1  140.25    4.67
   8   7  -1  120.71    4.56
   8  -7  -1  123.17    4.60
  -7  -7   1  129.47    4.69
   7  -7  -1  126.51    4.65
   7   7  -1  127.31    4.64
  -7  -7   1  137.66    4.84
  -7  -7   1  136.54    4.84
  -7  -7   1  134.47    4.83
   7  -7  -1  130.72    4.80
  -6  -7   1    6.13    0.55
   6  -7  -1    5.63    0.75
   6  -7  -1    5.64    0.63
   6   7  -1    5.94    0.64
  -6  -7   1    6.56    0.73
  -6  -7   1    5.52    0.78
  -6  -7   1    6.51    0.78
  -6  -7   1    5.41    0.78
   5   7  -1   20.85    1.06
   5  -7  -1   20.05    1.06
  -5  -7   1   21.61    1.21
  -5  -7   1   17.95    1.65
  -5  -7   1   20.38    1.20
  -5  -7   1   20.71    1.23
  -5  -7   1   21.68    1.05
   5  -7  -1   20.22    1.19
  -4  -7   1   27.27    1.17
   4  -7  -1   24.36    1.26
   4  -7  -1   25.77    1.11
  -4  -7   1   25.58    1.28
  -4   7   1   22.37    1.63
  -4  -7   1   22.17    1.60
  -4  -7   1   25.20    1.23
  -4  -7   1   24.31    1.26
  -4  -7   1   25.70    1.32
   4  -7  -1   23.28    1.18
   3  -7  -1  319.07   10.14
  -3  -7   1  335.88   10.31
  -3  -7   1  327.95   10.66
   3  -7  -1  318.63   10.61
  -3   7   1  321.42   10.66
   3   7  -1  303.52   10.56
  -3  -7   1  319.47   10.18
  -3  -7   1  324.56   10.22
  -3  -7   1  326.37   10.29
  -3  -7   1  329.78   10.15
  -3  -7   1  330.80   12.61
   3  -7  -1  332.60   10.25
   2  -7  -1   33.26    1.29
  -2  -7   1   32.75    1.41
   2  -7  -1   33.58    1.41
   2   7  -1   30.32    1.36
  -2   7   1   33.66    1.67
  -2   7   1   32.17    1.42
  -2  -7   1   30.73    1.39
  -2  -7   1   32.49    1.37
  -2  -7   1   29.83    1.31
   2   7  -1   34.06    2.55
  -2  -7   1   32.71    2.64
  -2   7   1   33.88    1.88
  -2  -7   1   32.34    1.30
  -1  -7   1  186.98    6.04
  -1  -7   1  184.90    6.07
   1   7  -1  193.67    7.55
  -1  -7   1  205.53    7.83
  -1  -7   1  184.18    6.01
  -1   7   1  200.49    7.21
  -1   7   1  203.49    6.77
   0  -7   1   67.50    2.51
   0   7   1   74.62    3.26
   0  -7   1   72.72    2.49
   0  -7   1   78.00    3.80
   0   7   1   75.39    3.71
   0   7  -1   71.08    3.55
  -1  -7  -1  168.65    5.48
  -1  -7  -1  161.11    5.46
   1  -7   1  165.73    5.41
   1   7   1  178.34    6.53
   1   7   1  183.03    7.18
   1  -7   1  170.04    5.44
  -1   7  -1  175.02    6.41
   1  -7   1  184.53    6.69
   2  -7   1    0.71    0.27
  -2   7  -1    0.60    0.28
   2   7   1    0.59    0.26
  -2   7  -1    0.85    0.43
   2   7   1    1.22    0.90
   2   7   1    0.83    0.61
  -2  -7  -1    0.75    0.28
  -2  -7  -1    0.39    0.28
  -3  -7  -1    1.87    0.46
   3   7   1    1.92    0.45
  -3  -7  -1    1.19    0.40
  -3   7  -1    1.61    0.44
   3  -7   1    1.37    0.40
  -3  -7  -1    2.09    0.35
  -3  -7  -1    1.83    0.43
  -3  -7  -1    1.61    0.36
  -4  -7  -1  909.87   27.45
   4  -7   1  829.92   28.06
  -4  -7  -1  842.26   28.13
  -4   7  -1  855.17   28.14
  -4  -7  -1  933.77   27.31
  -4  -7  -1  905.65   27.43
  -4  -7  -1  882.24   27.32
   4  -7   1  891.32   27.17
   5  -7   1    6.65    0.56
   5   7   1    6.04    0.54
  -5  -7  -1    6.73    0.76
  -5  -7  -1    5.57    0.93
  -5  -7  -1    6.52    0.65
  -5  -7  -1    5.70    0.67
  -5  -7  -1    7.15    0.75
   5  -7   1    5.51    0.62
  -6  -7  -1    3.07    0.67
   6   7   1    3.21    0.49
   6  -7   1    2.21    0.48
  -6  -7  -1    3.10    0.64
   6  -7   1    2.51    0.54
  -7  -7  -1    4.51    0.75
   7   7   1    3.77    0.57
   7  -7   1    4.57    0.63
  -7  -7  -1    4.19    0.75
  -7  -7  -1    4.17    0.70
   7  -7   1    4.65    0.64
  -8  -7  -1   62.10    2.61
   8   7   1   55.50    2.41
   8  -7   1   57.83    2.44
  -8  -7  -1   58.53    2.50
  -8  -7  -1   56.73    2.51
  -9   7  -1   33.28    1.62
   9  -7   1   28.28    1.44
  -9  -7  -1   29.64    1.59
 -10   7  -1   11.67    0.83
 -10  -7  -1   10.72    0.82
 -10  -8   1    2.67    0.52
 -10   8   1    1.18    0.35
 -10  -8   1    2.19    0.49
  -9   8   1    8.46    0.72
   9  -8  -1    6.69    0.62
  -9   8   1    8.17    0.75
  -9  -8   1    7.23    0.84
  -9  -8   1    7.57    0.86
  -8  -8   1   51.48    2.29
  -8  -8   1   46.39    2.19
  -8  -8   1   50.60    2.28
  -8   8   1   44.39    2.07
   8  -8  -1   43.58    1.99
   7  -8  -1  116.74    4.25
  -7  -8   1  124.10    4.51
  -7  -8   1  121.93    4.52
  -7  -8   1  117.89    4.49
   7  -8  -1  125.34    4.50
  -7  -8   1  113.92    4.36
   6  -8  -1  198.24    6.64
  -6  -8   1  202.97    6.86
  -6  -8   1  203.58    6.95
  -6  -8   1  199.52    6.87
   6  -8  -1  206.51    6.90
  -6  -8   1  198.39    6.54
   5  -8  -1   96.58    3.50
  -5  -8   1  101.79    3.78
  -5  -8   1  105.41    3.74
  -5  -8   1  101.55    3.75
  -5  -8   1  101.59    3.82
  -5  -8   1  102.19    3.55
   5  -8  -1  102.25    3.78
  -4  -8   1    0.26    0.41
   4  -8  -1    0.57    0.37
  -4  -8   1    0.12    0.46
  -4  -8   1    0.11    0.29
  -4  -8   1    0.27    0.38
  -4  -8   1    0.18    0.47
   4  -8  -1    0.05    0.43
  -4  -8   1   -0.17    0.30
   3  -8  -1  247.92    7.74
  -3  -8   1  239.60    7.90
   3  -8  -1  215.55    7.93
  -3  -8   1  213.20    7.96
  -3  -8   1  245.37    7.76
  -3  -8   1  240.58    7.89
  -3  -8   1  272.37    7.87
  -3  -8   1  250.32    7.74
   3  -8  -1  243.48    7.83
   2  -8  -1   13.68    0.74
  -2  -8   1   11.07    0.83
  -2  -8   1   14.24    0.76
  -2  -8   1   13.12    0.80
  -2  -8   1   13.28    0.76
  -2   8   1   13.73    1.23
  -2   8   1   12.74    1.04
   2   8  -1   13.31    1.78
   1  -8  -1   52.92    2.03
  -1   8   1   60.23    2.82
  -1  -8   1   60.37    2.15
  -1  -8   1   57.20    2.16
  -1  -8   1   54.71    2.10
  -1   8   1   65.56    3.31
   1   8  -1   58.50    3.50
  -1  -8   1   58.49    3.65
   0  -8   1  174.45    5.48
   0  -8  -1  170.13    5.42
   0   8   1  176.17    6.47
   0  -8  -1  165.93    5.40
   0  -8   1  159.25    5.39
   0  -8  -1  159.45    5.34
   0  -8   1  163.69    5.40
   0   8  -1  165.23    6.83
   0  -8   1  184.98    7.23
   0   8   1  172.43    7.03
   1  -8   1   61.33    2.37
  -1  -8  -1   64.91    2.41
   1   8   1   64.79    3.35
  -1  -8  -1   63.24    2.30
   1  -8   1   72.43    3.63
  -1   8  -1   66.87    3.32
   1  -8   1   62.07    2.35
   1   8   1   68.90    3.92
  -1  -8  -1   65.93    2.40
   2   8   1   95.35    4.06
  -2   8  -1  105.27    3.27
  -2  -8  -1  100.96    2.44
  -2  -8  -1  108.00    2.60
   2   8   1  102.37    4.88
  -2  -8  -1  101.31    2.41
  -2   8  -1   92.72    3.36
  -3  -8  -1  418.28   12.70
  -3  -8  -1  417.42   12.50
  -3  -8  -1  354.64   12.77
   3  -8   1  361.41   12.72
  -3  -8  -1  414.28   12.56
  -3  -8  -1  424.41   12.72
  -4  -8  -1    7.47    0.63
  -4  -8  -1    5.88    0.80
  -4  -8  -1    6.93    0.67
  -4  -8  -1    6.78    0.73
  -4  -8  -1    7.31    0.77
  -5  -8  -1   79.64    3.29
   5  -8   1   79.91    2.99
  -5  -8  -1   86.28    3.32
  -5  -8  -1   84.81    3.17
  -5  -8  -1   86.65    3.25
   5  -8   1   92.77    3.24
   6  -8   1    0.76    0.48
  -6  -8  -1    0.15    0.58
   6  -8   1    0.57    0.36
  -6  -8  -1    0.20    0.51
  -6  -8  -1    0.23    0.54
  -6  -8  -1    0.31    0.54
   7  -8   1    2.65    0.58
  -7  -8  -1    2.88    0.70
   7  -8   1    3.18    0.52
  -7  -8  -1    3.41    0.71
  -7  -8  -1    2.72    0.73
  -8  -8  -1    9.81    1.00
  -8  -8  -1    9.38    0.95
  -8  -8  -1    9.33    0.92
  -8  -8  -1    8.46    0.89
  -9   8  -1    7.34    0.78
   9  -8   1    4.82    0.54
  -9  -8  -1    6.27    0.79
 -10  -8  -1    0.98    0.42
 -10  -8  -1    0.66    0.41
 -10   8  -1    0.81    0.39
 -10  -9   1    4.16    0.52
 -10  -9   1    3.03    0.50
  -9  -9   1   21.95    1.33
  -9   9   1   20.88    1.18
  -9  -9   1   25.07    1.38
  -9   9   1   24.50    1.21
  -8  -9   1   -0.11    0.54
  -8   9   1    0.24    0.46
  -8  -9   1   -0.16    0.43
  -8  -9   1    0.18    0.59
   7  -9  -1   58.95    2.64
  -7  -9   1   62.29    2.72
  -7  -9   1   57.61    2.63
  -7  -9   1   58.19    2.56
  -6  -9   1    0.04    0.55
  -6  -9   1    0.26    0.63
  -6  -9   1    0.22    0.58
  -6  -9   1    0.67    0.63
   6  -9  -1    0.49    0.59
  -5  -9   1  300.33    9.68
  -5  -9   1  292.12    9.47
   5  -9  -1  300.37    9.76
  -5  -9   1  305.76    9.85
  -5  -9   1  289.58    9.70
  -5  -9   1  297.92    9.77
  -4  -9   1   24.49    1.39
   4  -9  -1   24.18    1.25
  -4  -9   1   23.86    1.26
  -4  -9   1   23.97    1.40
  -4  -9   1   20.40    1.27
  -4  -9   1   23.87    1.18
   4  -9  -1   24.10    1.33
  -3  -9   1   19.14    1.15
   3  -9  -1   18.00    0.99
  -3  -9   1   17.73    1.00
  -3  -9   1   18.01    1.07
  -3  -9   1   18.00    1.14
  -3  -9   1   19.33    1.00
   3  -9  -1   17.44    1.09
  -2  -9   1  121.93    4.39
   2  -9  -1  127.05    4.20
  -2  -9   1  124.73    4.19
  -2  -9   1  123.92    4.29
  -2  -9   1  121.37    4.35
  -2  -9   1  128.20    4.25
  -1   9   1  197.58    7.35
   1  -9  -1  201.78    6.34
   1  -9  -1  202.84    6.33
   1  -9  -1  195.42    6.30
  -1  -9   1  184.06    6.23
  -1  -9   1  194.22    6.40
  -1  -9   1  196.20    6.44
  -1   9   1  193.13    7.87
  -1  -9   1  202.23    6.39
   1   9  -1  200.85    8.41
  -1  -9   1  210.63    8.79
   0  -9   1  447.89   13.91
   0  -9  -1  437.18   13.85
   0   9   1  454.59   15.93
   0   9  -1  447.19   15.68
   0  -9  -1  427.67   13.82
   0  -9   1  460.49   13.86
   0  -9  -1  446.22   13.78
   0   9   1  451.52   15.15
   1   9   1    1.06    0.86
  -1   9  -1    1.81    0.66
   1   9   1    1.27    0.62
  -1   9  -1    1.21    0.52
  -1  -9  -1    0.59    0.33
  -1  -9  -1    1.27    0.42
   1  -9   1    1.25    0.39
  -1  -9  -1    0.58    0.38
   1  -9   1    1.15    0.32
   1  -9   1    0.52    0.38
  -2  -9  -1   56.87    2.18
  -2  -9  -1   55.91    2.28
  -2  -9  -1   56.48    2.06
  -2  -9  -1   56.46    2.30
  -3  -9  -1    1.62    0.36
  -3  -9  -1    1.16    0.51
  -3  -9  -1    1.35    0.42
  -4  -9  -1    2.33    0.46
  -4  -9  -1    2.17    0.64
  -4  -9  -1    1.83    0.49
  -5  -9  -1   15.67    1.07
  -5  -9  -1   15.31    1.17
  -5  -9  -1   16.95    1.24
  -5  -9  -1   16.53    1.14
   5  -9   1   19.70    1.18
  -6  -9  -1   17.57    1.20
  -6  -9  -1   16.01    1.27
  -6  -9  -1   18.58    1.30
  -6  -9  -1   16.27    1.20
   6  -9   1   16.70    1.17
  -7  -9  -1    3.79    0.76
  -7  -9  -1    2.48    0.68
  -7  -9  -1    2.14    0.69
   7  -9   1    3.22    0.62
  -7  -9  -1    2.98    0.72
  -8  -9  -1   19.54    1.28
   8  -9   1   18.37    1.15
  -8  -9  -1   22.34    1.36
  -8  -9  -1   20.23    1.33
  -9  -9  -1   27.07    1.45
  -9   9  -1   28.80    1.44
  -9  -9  -1   25.34    1.45
 -10  -9  -1   16.32    0.90
 -10   9  -1   14.34    0.87
 -10  -9  -1   15.59    0.93
  -9  10   1    0.08    0.37
  -9 -10   1    0.82    0.48
  -9  10   1    0.22    0.31
  -8 -10   1    4.30    0.64
  -8 -10   1    5.07    0.74
  -8  10   1    5.08    0.63
  -8 -10   1    5.40    0.79
  -7 -10   1   41.60    2.06
  -7 -10   1   40.24    2.01
  -7 -10   1   40.35    2.11
  -7 -10   1   42.86    2.09
   7 -10  -1   40.79    2.07
  -6 -10   1   58.99    2.57
  -6 -10   1   56.10    2.58
  -6 -10   1   59.75    2.72
  -6 -10   1   57.91    2.61
   6 -10  -1   58.41    2.61
  -5 -10   1   23.79    1.39
  -5 -10   1   23.71    1.47
  -5 -10   1   22.94    1.53
  -5 -10   1   24.67    1.47
   5 -10  -1   21.47    1.43
  -4 -10   1    0.42    0.53
   4 -10  -1    0.87    0.47
  -4 -10   1    0.56    0.42
  -4 -10   1    0.81    0.57
  -4 -10   1    0.68    0.63
  -4 -10   1    0.92    0.39
   4 -10  -1    0.54    0.54
  -3 -10   1    3.43    0.50
  -3 -10   1    3.20    0.63
   3 -10  -1    3.35    0.50
  -3 -10   1    3.05    0.56
   3 -10  -1    3.24    0.60
   2 -10  -1   37.69    1.63
  -2 -10   1   36.81    1.60
  -2 -10   1   39.24    1.82
  -2 -10   1   43.91    1.81
  -2 -10   1   38.47    1.68
   1 -10  -1    0.21    0.31
   1 -10  -1    0.18    0.32
  -1 -10   1    0.46    0.45
  -1 -10   1    0.59    0.40
   1 -10  -1    0.24    0.28
  -1 -10   1    0.49    0.38
   0 -10  -1  552.98   17.21
   0 -10  -1  553.74   17.24
   0 -10   1  558.99   17.31
   0 -10   1  560.32   17.24
   0 -10  -1  564.89   17.16
   0 -10   1  534.95   17.20
  -1 -10  -1  129.96    4.35
   1 -10   1  116.36    4.29
  -1 -10  -1  127.16    4.45
  -1 -10  -1  129.21    4.48
   1 -10   1  140.63    4.51
  -2 -10  -1    1.20    0.29
   2 -10   1    1.14    0.41
  -2 -10  -1    0.92    0.50
  -2 -10  -1    1.17    0.42
  -2 -10  -1    1.20    0.51
  -3 -10  -1  101.97    3.76
  -3 -10  -1  106.43    3.66
  -4 -10  -1    0.45    0.47
  -4 -10  -1    0.48    0.39
  -4 -10  -1    0.61    0.59
  -4 -10  -1    0.26    0.57
   4 -10   1    0.64    0.50
  -5 -10  -1   25.95    1.39
  -5 -10  -1   27.15    1.58
  -5 -10  -1   24.37    1.59
  -5 -10  -1   22.10    1.41
   5 -10   1   26.49    1.47
  -6 -10  -1    0.69    0.58
  -6 -10  -1    0.14    0.51
  -6 -10  -1    0.17    0.63
  -6 -10  -1    0.89    0.69
   6 -10   1    0.14    0.52
  -7 -10  -1   74.90    2.96
  -7 -10  -1   71.63    3.02
  -7 -10  -1   72.23    3.04
  -7 -10  -1   66.88    2.93
   7 -10   1   68.34    2.86
  -8 -10  -1   70.53    2.81
  -8 -10  -1   71.20    2.83
  -8 -10  -1   71.19    2.86
  -8 -10  -1   72.21    2.82
  -9  10  -1    0.78    0.42
  -9 -10  -1    0.11    0.43
  -9 -11   1   25.99    1.30
  -9 -11   1   27.65    1.31
  -9  11   1   24.01    1.16
  -8 -11   1    3.44    0.67
  -8 -11   1    3.09    0.55
  -8 -11   1    3.01    0.65
  -8  11   1    2.49    0.48
  -8 -11   1    3.48    0.68
  -7 -11   1    9.16    0.94
  -7 -11   1    8.83    0.92
  -7 -11   1    9.79    1.00
  -7 -11   1    8.70    1.01
   7 -11  -1    7.87    0.94
  -6 -11   1   54.09    2.44
  -6 -11   1   53.08    2.50
  -6 -11   1   54.65    2.52
  -6 -11   1   57.00    2.64
   6 -11  -1   52.67    2.48
  -5 -11   1   44.80    2.07
  -5 -11   1   43.88    2.22
  -5 -11   1   46.76    2.30
  -5 -11   1   45.31    2.20
   5 -11  -1   45.18    2.19
  -5 -11   1   42.58    1.85
   4 -11  -1  142.17    4.96
  -4 -11   1  141.19    4.95
  -4 -11   1  144.20    5.18
  -4 -11   1  139.11    5.18
  -4 -11   1  145.67    5.09
   4 -11  -1  135.75    5.06
  -4 -11   1  138.88    4.84
   3 -11  -1  392.65   12.11
  -3 -11   1  372.75   12.07
  -3 -11   1  400.23   12.39
  -3 -11   1  366.77   12.22
  -3 -11   1  376.11   12.06
   2 -11  -1   89.68    3.25
  -2 -11   1   97.03    3.50
  -2 -11   1   93.14    3.30
   1 -11  -1   75.26    2.71
   1 -11  -1   71.34    2.71
  -1 -11   1   74.57    2.91
   1 -11  -1   68.87    2.63
  -1 -11   1   70.30    2.82
  -1 -11   1   69.37    2.74
   0 -11  -1   10.87    0.79
   0 -11   1   10.17    0.83
   0 -11  -1   12.12    0.84
   0 -11   1   13.17    0.97
   0 -11  -1   11.86    0.86
  -1 -11  -1   10.77    0.81
   1 -11   1    8.95    0.71
  -1 -11  -1    9.16    0.81
   1 -11   1   10.78    0.86
  -1 -11  -1   11.10    0.88
   2 -11   1    4.37    0.62
  -2 -11  -1    5.74    0.75
  -2 -11  -1    4.55    0.60
  -2 -11  -1    5.28    0.72
  -3 -11  -1    0.31    0.32
  -3 -11  -1   -0.03    0.45
  -4 -11  -1   65.09    2.68
  -4 -11  -1   72.49    2.99
  -4 -11  -1   70.09    2.99
  -4 -11  -1   70.00    2.83
   4 -11   1   69.96    2.85
   5 -11   1    8.97    1.01
  -5 -11  -1    9.70    0.86
  -5 -11  -1   10.26    1.07
  -5 -11  -1   10.76    1.00
  -5 -11  -1   11.21    1.14
   5 -11   1   10.91    0.99
  -6 -11  -1    0.26    0.57
  -6 -11  -1    0.21    0.48
  -6 -11  -1    0.34    0.69
  -6 -11  -1    1.14    0.69
   6 -11   1    0.51    0.53
  -7 -11  -1   33.30    1.73
  -7 -11  -1   35.13    1.86
  -7 -11  -1   35.49    1.82
  -7 -11  -1   37.00    1.91
   7 -11   1   32.27    1.71
  -8 -11  -1    1.30    0.54
  -8 -11  -1    1.38    0.55
  -8 -11  -1    1.93    0.55
  -8 -11  -1    1.36    0.56
   8 -11   1    1.33    0.44
  -9 -11  -1   -0.02    0.37
  -9  11  -1    0.13    0.35
  -9 -11  -1    0.18    0.37
  -8  12   1   48.73    2.05
  -8 -12   1   51.61    2.20
  -7 -12   1   31.46    1.65
  -7 -12   1   31.63    1.70
  -7 -12   1   31.36    1.75
  -7 -12   1   34.85    1.85
   7 -12  -1   33.25    1.75
  -6 -12   1   49.21    2.31
  -6 -12   1   52.92    2.48
  -6 -12   1   51.40    2.48
  -6 -12   1   54.70    2.58
   6 -12  -1   55.77    2.47
  -5 -12   1   80.05    3.18
  -5 -12   1   74.70    3.32
  -5 -12   1   84.34    3.48
  -5 -12   1   80.60    3.31
  -5 -12   1   77.34    2.92
   5 -12  -1   82.37    3.31
  -4 -12   1  136.58    4.95
  -4 -12   1  140.75    5.24
   4 -12  -1  142.99    5.02
   4 -12  -1  148.97    5.19
  -4 -12   1  140.19    4.88
   3 -12  -1   12.17    0.91
  -3 -12   1    9.81    0.82
  -3 -12   1   10.30    1.07
  -3 -12   1   12.01    0.87
  -3 -12   1   11.71    1.12
   2 -12  -1   40.64    1.81
  -2 -12   1   40.02    2.01
  -2 -12   1   39.41    1.83
   2 -12  -1   41.57    1.94
   1 -12  -1    3.17    0.52
   1 -12  -1    2.52    0.44
  -1 -12   1    3.04    0.63
  -1 -12   1    2.33    0.58
  -1 -12   1    2.63    0.68
   1 -12  -1    2.80    0.51
   0 -12   1   19.22    1.25
   0 -12  -1   18.85    1.15
   0 -12  -1   17.07    1.06
   0 -12   1   17.40    1.13
   0 -12  -1   19.60    1.14
   1 -12   1  137.03    4.76
  -1 -12  -1  144.73    4.79
  -1 -12  -1  134.06    4.60
  -1 -12  -1  131.09    4.69
  -2 -12  -1    0.04    0.58
   2 -12   1    0.68    0.47
  -2 -12  -1    0.82    0.46
  -2 -12  -1   -0.04    0.54
  -3 -12  -1   70.91    2.97
  -3 -12  -1   72.51    2.82
   3 -12   1   75.41    2.86
  -4 -12  -1   -0.20    0.42
  -4 -12  -1    0.13    0.73
   4 -12   1    0.07    0.62
  -4 -12  -1    0.18    0.55
   4 -12   1    0.64    0.59
   5 -12   1   62.91    2.73
  -5 -12  -1   58.35    2.51
  -5 -12  -1   63.77    2.84
  -5 -12  -1   60.66    2.68
  -5 -12  -1   64.10    2.86
   5 -12   1   61.72    2.68
  -6 -12  -1   10.70    0.91
  -6 -12  -1    9.83    1.06
  -6 -12  -1   11.07    1.02
  -6 -12  -1   12.06    1.17
   6 -12   1   12.09    1.01
  -7 -12  -1   10.30    0.88
  -7 -12  -1   11.09    1.00
  -7 -12  -1   10.45    0.94
  -7 -12  -1    9.76    1.01
   7 -12   1    9.80    0.88
  -8 -12  -1    1.84    0.50
  -8 -12  -1    2.28    0.49
  -8 -12  -1    1.56    0.54
  -8 -12  -1    2.16    0.51
   8 -12   1    1.06    0.40
  -8 -13   1    0.26    0.35
  -8 -13   1    1.09    0.43
  -7 -13   1   30.24    1.52
  -7 -13   1   29.88    1.61
  -7 -13   1   33.25    1.73
  -7 -13   1   29.21    1.60
   7 -13  -1   32.57    1.65
  -6 -13   1   19.21    1.23
  -6 -13   1   23.81    1.46
  -6 -13   1   21.88    1.52
  -6 -13   1   19.47    1.38
   6 -13  -1   19.66    1.34
  -5 -13   1  420.48   13.17
  -5 -13   1  415.14   13.23
   5 -13  -1  419.82   13.07
   4 -13  -1   50.86    2.21
   4 -13  -1   52.67    2.39
  -4 -13   1   52.04    2.48
  -3 -13   1   84.99    3.65
   3 -13  -1   90.05    3.41
  -3 -13   1   92.76    3.73
   2 -13  -1   10.30    0.85
  -2 -13   1    9.46    1.02
   2 -13  -1    9.84    0.93
   1 -13  -1   21.63    1.28
  -1 -13   1   24.37    1.54
   1 -13  -1   23.90    1.30
  -1 -13   1   22.91    1.44
   0 -13   1   95.19    3.70
   0 -13  -1   98.75    3.59
   0 -13  -1   95.89    3.48
   0 -13  -1   90.93    3.49
   0 -13   1   84.03    3.49
  -1 -13  -1   25.43    1.48
   1 -13   1   24.47    1.48
  -1 -13  -1   23.45    1.42
  -1 -13  -1   24.07    1.35
  -2 -13  -1  211.30    6.90
   2 -13   1  197.23    6.69
  -2 -13  -1  201.25    6.84
  -2 -13  -1  205.68    6.70
  -3 -13  -1    7.95    0.99
  -3 -13  -1    9.73    0.91
  -3 -13  -1    9.19    1.03
   3 -13   1    8.72    0.91
  -4 -13  -1    4.16    0.56
   4 -13   1    5.34    0.83
  -4 -13  -1    6.42    0.82
   4 -13   1    6.84    0.87
   5 -13   1   34.63    1.85
  -5 -13  -1   37.52    1.99
  -5 -13  -1   35.39    1.95
  -5 -13  -1   34.45    1.80
   5 -13   1   35.65    1.83
  -5 -13  -1   29.45    1.57
  -6 -13  -1   90.52    3.50
  -6 -13  -1   85.97    3.37
  -6 -13  -1   90.36    3.53
   6 -13   1   88.15    3.35
  -7 -13  -1   10.88    0.95
  -7 -13  -1   10.95    0.98
  -7 -13  -1    9.26    0.86
   7 -13   1    9.02    0.80
  -7 -13  -1    8.72    0.76
  -8 -13  -1   34.84    1.56
  -8  13  -1   33.51    1.42
  -8 -13  -1   33.22    1.46
  -8 -13  -1   31.54    1.48
  -7 -14   1   22.04    1.27
  -7 -14   1   26.06    1.39
   7 -14  -1   25.22    1.30
  -6 -14   1   38.62    1.98
  -6 -14   1   37.05    1.92
   6 -14  -1   38.02    1.89
  -5 -14   1   68.18    3.00
  -5 -14   1   67.36    2.94
   5 -14  -1   64.76    2.83
  -4 -14   1   16.56    1.40
   4 -14  -1   17.74    1.17
  -3 -14   1    8.50    1.08
   3 -14  -1    9.51    0.87
  -2 -14   1    0.14    0.73
  -2 -14   1    0.22    0.61
   2 -14  -1    0.08    0.63
   2 -14  -1   -0.10    0.48
  -1 -14   1   -0.41    0.69
   1 -14  -1   -0.03    0.43
  -1 -14   1    0.12    0.57
   1 -14  -1   -0.04    0.53
   1 -14  -1    0.76    0.49
   0 -14  -1    7.84    0.79
   0 -14   1    7.16    0.80
   0 -14  -1    8.01    0.85
   0 -14   1    7.69    0.92
   0 -14  -1    7.40    0.76
  -1 -14  -1    0.30    0.50
   1 -14   1   -0.04    0.53
  -1 -14  -1    0.52    0.58
  -1 -14  -1   -0.23    0.49
   1 -14   1    0.11    0.61
  -2 -14  -1    2.14    0.69
  -2 -14  -1    2.08    0.69
   2 -14   1    2.49    0.68
  -2 -14  -1    1.95    0.57
  -3 -14  -1  141.43    5.12
   3 -14   1  136.21    4.94
   3 -14   1  127.20    4.97
  -3 -14  -1  136.88    5.09
  -3 -14  -1  139.08    4.91
  -4 -14  -1    0.32    0.54
   4 -14   1    0.46    0.67
   4 -14   1    0.62    0.64
   5 -14   1   77.18    2.93
  -5 -14  -1   77.72    2.89
  -5 -14  -1   81.50    3.10
  -5 -14  -1   76.35    3.06
   6 -14   1   22.34    1.28
  -6 -14  -1   20.03    1.21
  -6 -14  -1   22.25    1.41
  -6 -14  -1   19.40    1.32
  -7 -14  -1    7.45    0.80
  -7 -14  -1    7.56    0.68
   7 -14   1    6.03    0.64
  -7 -14  -1    7.88    0.76
   7 -15  -1    0.24    0.37
  -7 -15   1   -0.02    0.35
  -6 -15   1   54.91    2.44
   6 -15  -1   56.89    2.35
  -6 -15   1   54.39    2.38
   5 -15  -1   17.46    1.20
  -5 -15   1   16.27    1.25
  -4 -15   1   -0.53    0.70
   4 -15  -1   -0.06    0.47
  -4 -15   1    0.31    0.67
   3 -15  -1    9.58    0.85
  -3 -15   1    8.40    1.02
   3 -15  -1    8.57    0.99
   2 -15  -1    0.19    0.46
  -2 -15   1    0.13    0.62
   2 -15  -1    0.41    0.54
  -2 -15   1    0.42    0.72
   1 -15  -1   21.48    1.28
  -1 -15   1   23.06    1.45
  -1 -15   1   21.44    1.41
   1 -15  -1   22.44    1.37
  -1 -15   1   24.46    1.60
   0 -15   1    6.63    0.84
   0 -15  -1    6.75    0.74
   0 -15  -1    4.86    0.65
   0 -15  -1    5.66    0.72
   0 -15   1    5.83    0.89
   0 -15  -1    5.81    0.76
   1 -15   1   99.75    3.61
  -1 -15  -1   93.43    3.48
  -1 -15  -1   89.49    3.56
  -1 -15  -1   87.19    3.39
   1 -15   1   84.96    3.57
  -1 -15  -1   91.80    3.62
   2 -15   1    4.86    0.81
  -2 -15  -1    4.94    0.70
  -2 -15  -1    5.75    0.82
  -2 -15  -1    4.32    0.55
  -2 -15  -1    4.82    0.79
   3 -15   1  130.41    4.77
  -3 -15  -1  130.02    4.90
  -3 -15  -1  132.18    4.71
   3 -15   1  127.31    4.79
  -3 -15  -1  136.80    4.95
   4 -15   1  142.08    5.15
  -4 -15  -1  143.61    5.09
  -4 -15  -1  145.63    5.33
   4 -15   1  147.24    5.20
  -5 -15  -1  126.24    4.51
   5 -15   1  122.89    4.56
  -5 -15  -1  133.45    4.73
  -6 -15  -1   12.10    1.00
  -6 -15  -1    9.73    0.80
   6 -15   1   11.56    0.88
  -6 -15  -1   11.32    0.95
  -7 -15  -1   32.58    1.42
  -7 -15  -1   37.80    1.63
   7 -15   1   32.44    1.44
  -7 -15  -1   33.37    1.55
   6 -16  -1    6.05    0.63
  -6 -16   1    6.14    0.67
   5 -16  -1    3.78    0.64
  -5 -16   1    3.30    0.67
  -4 -16   1   -0.08    0.57
   3 -16  -1   16.00    1.02
  -3 -16   1   14.64    1.19
  -3 -16   1   13.58    1.07
   3 -16  -1   12.55    1.06
   2 -16  -1    4.16    0.61
  -2 -16   1    3.89    0.73
  -2 -16   1    3.98    0.73
   2 -16  -1    3.55    0.68
  -2 -16   1    4.96    0.86
   1 -16  -1    0.69    0.47
  -1 -16   1    0.32    0.59
   1 -16  -1    0.96    0.54
  -1 -16   1    1.15    0.66
   0 -16  -1   29.95    1.50
   0 -16   1   33.54    1.67
   0 -16  -1   29.61    1.52
   0 -16  -1   25.41    1.51
   0 -16   1   27.32    1.65
   1 -16   1    0.56    0.60
  -1 -16  -1    0.71    0.49
  -1 -16  -1    0.99    0.50
  -1 -16  -1    1.43    0.45
   1 -16   1    0.66    0.53
  -1 -16  -1    0.61    0.54
  -2 -16  -1    6.89    0.83
   2 -16   1    7.12    0.82
  -2 -16  -1    7.23    0.75
  -2 -16  -1    6.34    0.86
   3 -16   1   82.15    3.23
  -3 -16  -1   80.87    3.13
  -3 -16  -1   82.11    3.33
   3 -16   1   80.99    3.26
  -3 -16  -1   86.58    3.38
  -4 -16  -1    3.01    0.52
   4 -16   1    3.37    0.64
  -4 -16  -1    3.10    0.72
   4 -16   1    2.73    0.65
  -4 -16  -1    3.20    0.72
  -5 -16  -1   34.66    1.58
   5 -16   1   36.58    1.68
  -6 -16  -1    0.16    0.26
  -6 -16  -1    0.44    0.45
   6 -16   1    0.13    0.33
  -6 -16  -1    0.35    0.44
  -5 -17   1    9.84    0.71
  -5 -17   1    9.64    0.81
  -4 -17   1   10.20    0.79
   4 -17  -1    8.75    0.80
   3 -17  -1   27.27    1.32
  -3 -17   1   26.56    1.43
   3 -17  -1   27.38    1.44
  -3 -17   1   30.07    1.63
  -2 -17   1   24.64    1.38
   2 -17  -1   24.69    1.25
   2 -17  -1   23.58    1.35
  -2 -17   1   26.33    1.54
   1 -17  -1   11.67    0.84
  -1 -17   1   10.89    0.93
   1 -17  -1   10.98    0.89
  -1 -17   1   11.79    1.04
   0 -17  -1   10.39    0.80
   0 -17   1   10.11    0.89
   0 -17   1    8.80    0.84
   0 -17  -1   10.05    0.80
   0 -17   1    9.21    0.90
  -1 -17  -1   19.69    1.09
   1 -17   1   18.66    1.17
   1 -17   1   18.14    1.19
  -1 -17  -1   16.18    0.97
  -1 -17  -1   18.06    1.17
  -2 -17  -1   15.00    1.08
   2 -17   1   17.97    1.14
  -2 -17  -1   17.59    1.04
  -2 -17  -1   18.40    1.19
  -3 -17  -1   68.31    2.90
  -3 -17  -1   75.64    2.78
   3 -17   1   76.81    2.90
  -3 -17  -1   75.70    2.99
  -4 -17  -1    0.04    0.32
  -4 -17  -1   -0.42    0.47
   4 -17   1   -0.46    0.46
  -4 -17  -1    0.16    0.47
  -5 -17  -1   54.26    2.22
   5 -17   1   55.36    2.15
  -4 -18   1   15.04    0.83
   4 -18  -1   15.55    0.88
  -4 -18   1   13.83    0.93
  -3 -18   1   13.80    0.86
   3 -18  -1   13.88    0.88
  -3 -18   1   13.62    0.97
  -2 -18   1   47.89    1.80
   2 -18  -1   43.92    1.63
   2 -18  -1   42.34    1.74
  -2 -18   1   41.77    1.87
   1 -18  -1   45.34    1.75
  -1 -18   1   39.30    1.74
   1 -18  -1   40.82    1.78
  -1 -18   1   39.41    1.89
   0 -18   1   11.56    0.85
   0 -18  -1   12.75    0.76
   0 -18  -1   10.07    0.71
   0 -18   1   10.05    0.79
   1 -18   1   52.52    1.98
  -1 -18  -1   45.92    1.80
   1 -18   1   49.55    1.96
  -2 -18  -1   53.70    1.98
   2 -18   1   58.58    2.14
   2 -18   1   53.97    2.14
  -3 -18  -1    0.74    0.38
  -3 -18  -1    2.04    0.34
   3 -18   1    2.25    0.45
  -3 -18  -1    1.92    0.47
   4 -18   1    0.27    0.34
  -4 -18  -1    0.25    0.34
  -2 -19   1    9.28    0.62
  -1 -19   1    4.59    0.47
   0 -19   1   10.10    0.68
   0 -19   1   12.96    0.76
   1 -19   1   30.55    1.40
   1 -19   1   37.08    1.46
   2 -19   1    0.54    0.31
 -11   0   2   37.27    1.64
  11   0  -2   49.72    1.91
 -10   0   2    1.93    0.50
  10   0  -2    2.77    0.68
  -9   0   2   30.07    1.59
   9   0  -2   30.56    1.77
  -8   0   2  164.04    5.86
   8   0  -2  181.54    6.16
  -8   0   2  171.50    5.92
  -8   0   2  175.54    5.83
  -7   0   2    8.80    0.74
   7   0  -2    9.48    0.90
  -7   0   2    6.99    0.72
  -7   0   2    7.18    0.70
  -6   0   2   44.75    1.86
   6   0  -2   46.90    2.01
  -6   0   2   46.29    1.89
  -6   0   2   45.79    1.89
   5   0  -2 1501.72   46.70
  -5   0   2 1513.11   47.44
  -5   0   2 1521.76   45.98
   5   0  -2 1553.06   46.08
  -5   0   2 1527.64   45.96
  -5   0   2 1516.32   45.96
  -5   0   2 1383.36   46.88
   4   0  -2  297.39   10.62
  -4   0   2  302.86   10.63
   4   0  -2  324.92   10.40
  -4   0   2  300.09   10.54
   4   0  -2  312.32    9.70
   3   0  -2 3584.79  107.15
   3   0  -2 3499.35  107.24
  -3   0   2 3589.35  107.25
  -3   0   2 3456.58  107.29
   2   0  -2   14.07    1.07
  -2   0   2   13.55    1.00
   2   0  -2   13.56    1.00
  -2   0   2   14.57    1.13
   1   0  -2  781.12   24.20
  -1   0   2  784.62   24.18
  -1   0   2  790.57   24.36
   0   0   2  470.89   14.81
   0   0   2  479.35   14.77
   0   0   2  469.46   14.92
   0   0  -2  474.16   14.89
  -1   0  -2   14.72    0.99
   1   0   2   15.00    0.97
  -1   0  -2   14.30    0.99
  -2   0  -2 1260.14   38.26
   2   0   2 1252.57   38.38
  -2   0  -2 1241.46   38.37
   2   0   2 1240.39   38.31
   3   0   2   17.97    1.20
   3   0   2   16.79    1.28
  -3   0  -2   15.87    1.12
  -3   0  -2   17.86    1.30
   4   0   2  123.10    4.59
  -4   0  -2  120.12    4.91
   4   0   2  119.16    4.91
   4   0   2  127.65    4.99
  -4   0  -2  118.30    3.90
  -4   0  -2  115.22    4.02
   5   0   2   48.12    2.77
  -5   0  -2   45.56    2.88
   5   0   2   50.06    2.50
   5   0   2   51.38    2.05
  -5   0  -2   52.75    1.94
  -5   0  -2   51.21    1.96
  -5   0  -2   50.02    1.98
  -6   0  -2    0.52    0.37
  -6   0  -2   -0.10    0.34
  -6   0  -2    0.05    0.41
   6   0   2    0.56    0.46
   7   0   2   69.70    2.87
  -7   0  -2   67.31    2.65
   8   0   2 2950.75   86.88
  -8   0  -2 2793.90   86.60
   9   0   2    1.37    0.71
  -9   0  -2    0.75    0.45
  10   0   2  183.43    6.34
  11   0   2    1.26    0.44
 -11  -1   2    2.55    0.40
 -11   1   2    2.25    0.38
  11   1  -2    3.46    0.55
 -10   1   2    1.07    0.47
 -10  -1   2    1.87    0.51
  10  -1  -2    1.87    0.62
  10   1  -2    1.68    0.62
  -9  -1   2   12.25    0.97
   9   1  -2   15.28    1.23
   9  -1  -2   14.91    1.23
  -9  -1   2   14.39    1.07
  -9   1   2   13.47    1.03
  -9   1   2   14.01    0.91
  -9  -1   2   12.10    0.83
  -8  -1   2   10.45    0.90
   8  -1  -2   10.80    1.07
   8   1  -2   10.62    1.06
  -8   1   2   11.05    0.91
  -8  -1   2   10.42    0.92
  -8  -1   2   10.42    0.82
  -8   1   2   10.24    0.86
  -7   1   2   25.86    1.30
  -7  -1   2   26.74    1.38
   7  -1  -2   28.18    1.54
   7   1  -2   27.88    1.53
  -7   1   2   25.14    1.36
  -7  -1   2   27.15    1.42
  -7   1   2   25.50    1.35
  -7  -1   2   26.46    1.33
  -6  -1   2   28.26    1.33
  -6   1   2   26.72    1.26
   6   1  -2   28.03    1.43
  -6   1   2   30.89    1.34
  -6  -1   2   27.85    1.33
  -6   1   2   25.62    1.30
  -6  -1   2   25.18    1.27
   5   1  -2  537.39   17.29
  -5   1   2  533.54   17.61
  -5  -1   2  544.13   16.19
   5   1  -2  536.80   16.28
  -5  -1   2  525.90   16.19
  -5   1   2  532.48   16.14
  -5  -1   2  533.55   16.19
  -5   1   2  524.31   16.15
  -5  -1   2  486.63   17.39
   4  -1  -2  164.79    5.46
  -4   1   2  160.41    5.99
   4   1  -2  149.32    5.89
  -4  -1   2  152.22    4.97
   4   1  -2  150.16    5.03
  -4  -1   2  157.19    4.96
   4   1  -2  161.54    5.95
  -4   1   2  145.85    5.56
  -4  -1   2  153.98    6.08
  -4  -1   2  153.05    4.97
   3   1  -2  114.83    4.38
   3  -1  -2  119.29    4.18
  -3   1   2  113.32    4.38
  -3  -1   2  112.02    4.58
  -3   1   2  110.48    4.26
   3   1  -2  110.69    4.48
   2  -1  -2  302.74    9.54
  -2   1   2  295.28    9.60
   2   1  -2  297.47    9.61
   2   1  -2  291.97    9.81
  -2  -1   2  289.39    9.88
  -2   1   2  285.03    9.60
   1   1  -2   28.04    1.37
  -1   1   2   27.70    1.47
  -1   1   2   29.34    1.39
  -1  -1   2   27.58    1.65
   0   1   2  653.57   20.07
   0   1   2  661.87   20.03
   0  -1   2  632.30   20.01
   0  -1  -2  652.78   20.13
   0   1   2  635.37   20.15
   0   1  -2  657.88   20.22
   0  -1   2  646.28   20.24
  -1  -1  -2   15.38    1.03
  -1   1  -2   15.81    1.03
   1   1   2   15.94    1.02
   1   1   2   15.04    1.08
  -1  -1  -2   15.93    1.08
  -1   1  -2   16.28    1.04
   2  -1   2  356.66   11.65
  -2   1  -2  371.54   11.62
   2   1   2  358.51   11.78
   2   1   2  364.84   11.76
  -2   1  -2  359.71   11.75
  -2  -1  -2  368.29   11.72
   3  -1   2  220.88    7.53
   3   1   2  226.19    7.81
  -3   1  -2  223.83    7.79
  -3   1  -2  223.98    7.44
  -3  -1  -2  226.35    7.66
   3   1   2  221.37    7.71
  -4   1  -2  188.24    5.99
  -4  -1  -2  187.10    6.02
  -4   1  -2  189.16    6.14
  -4  -1  -2  181.43    6.08
  -4   1  -2  190.16    7.06
   4   1   2  199.12    6.92
   4  -1   2  198.98    6.61
   4   1   2  185.73    7.07
  -4  -1  -2  186.79    6.01
   4   1   2  197.36    7.35
   4  -1   2  202.88    6.96
   5  -1   2   15.63    1.31
   5   1   2   17.57    1.71
   5   1   2   18.19    1.44
  -5   1  -2   18.03    1.68
   5  -1   2   16.24    1.18
   5   1   2   17.45    1.00
  -5  -1  -2   17.82    0.94
  -5  -1  -2   16.75    0.95
  -5   1  -2   18.23    0.95
  -5  -1  -2   17.72    0.93
  -5   1  -2   19.26    0.91
   6   1   2   21.62    1.22
  -6   1  -2   20.77    1.06
  -6  -1  -2   19.91    1.10
  -6  -1  -2   19.49    1.12
  -6   1  -2   20.67    1.07
  -6  -1  -2   20.31    1.12
   7  -1   2  475.49   14.89
   7   1   2  472.19   14.88
  -7  -1  -2  456.91   14.67
  -7   1  -2  471.82   14.63
  -7  -1  -2  460.01   14.69
   8   1   2    2.60    0.79
   8  -1   2    3.47    0.84
  -8  -1  -2    3.13    0.62
  -8   1  -2    3.74    0.59
   9  -1   2   38.03    1.97
   9   1   2   37.90    1.96
  -9  -1  -2   35.32    1.74
  -9   1  -2   34.05    1.64
  10   1   2    2.87    0.65
 -10  -1  -2    1.86    0.46
  11   1   2    0.35    0.38
  11  -2  -2   22.32    1.17
  11   2  -2   23.08    1.18
  10   2  -2    6.37    0.81
 -10  -2   2    4.41    0.58
 -10   2   2    4.38    0.62
 -10  -2   2    6.27    0.69
  -9  -2   2    0.03    0.47
   9   2  -2   -0.29    0.62
  -9   2   2    0.06    0.47
  -9  -2   2    0.31    0.53
  -9   2   2    0.59    0.41
  -8  -2   2  296.84    9.81
   8   2  -2  301.09    9.97
  -8   2   2  304.41    9.72
  -8   2   2  309.03    9.78
  -8  -2   2  288.11    9.77
  -7  -2   2    5.73    0.71
  -7   2   2    5.59    0.68
  -7   2   2    5.73    0.69
  -7  -2   2    6.09    0.64
  -6  -2   2  167.94    5.73
   6   2  -2  174.76    5.83
  -6  -2   2  168.13    5.72
  -6   2   2  177.14    5.69
  -6  -2   2  169.22    5.67
  -5  -2   2  364.79   12.46
  -5   2   2  347.99   12.37
  -5  -2   2  364.16   11.02
   5  -2  -2  348.37   11.10
   5   2  -2  360.85   11.12
  -5  -2   2  352.28   11.05
  -5  -2   2  344.63   11.03
  -5  -2   2  350.55   11.04
  -5   2   2  341.04   10.97
  -5  -2   2  341.20   12.60
   5  -2  -2  350.55   11.13
   5   2  -2  374.05   12.54
   4   2  -2   51.70    2.69
   4  -2  -2   51.25    2.67
  -4  -2   2   51.37    2.65
  -4   2   2   53.20    2.71
   4  -2  -2   52.48    2.04
  -4  -2   2   47.70    1.85
   4  -2  -2   52.74    1.93
   4   2  -2   52.51    1.94
  -4  -2   2   49.93    1.86
  -4  -2   2   50.49    1.89
  -4   2   2   48.69    2.18
   4   2  -2   53.58    2.89
  -4  -2   2   51.01    2.97
   4  -2  -2   50.24    1.94
  -3  -2   2   28.94    2.03
   3   2  -2   28.27    1.94
  -3   2   2   27.01    1.50
   3  -2  -2   32.67    1.45
   3  -2  -2   30.54    1.71
   3   2  -2   28.63    1.69
  -3   2   2   29.70    1.71
  -2   2   2    3.07    0.57
   2  -2  -2    3.01    0.50
  -2  -2   2    3.36    0.83
  -2   2   2    2.77    0.57
   2   2  -2    3.31    0.57
   2  -2  -2    3.38    0.58
   1   2  -2 1840.17   56.66
  -1  -2   2 1784.45   56.73
   1   2  -2 1839.97   56.26
  -1   2   2 1806.62   56.34
  -1   2   2 1875.81   56.25
   1  -2  -2 1934.33   56.32
   0  -2   2  490.61   15.88
   0   2   2  487.08   15.57
   0   2   2  505.42   15.52
   0   2  -2  503.92   15.83
   0   2   2  506.14   15.71
   1  -2   2  392.31   12.76
   1   2   2  396.45   12.62
  -1   2  -2  400.53   12.63
  -1   2  -2  396.90   12.68
   1   2   2  399.01   12.76
  -1  -2  -2  402.74   12.74
   2  -2   2   61.69    2.53
  -2   2  -2   59.52    2.43
  -2  -2  -2   59.04    2.61
   2   2   2   61.46    2.59
   2  -2   2   58.66    2.54
  -3   2  -2  845.08   26.57
   3   2   2  865.63   26.63
  -3   2  -2  861.38   26.11
   3   2   2  830.34   26.56
   3  -2   2  814.00   26.53
   3  -2   2  851.30   26.23
  -4  -2  -2  476.32   15.70
   4  -2   2  465.35   15.67
   4   2   2  479.28   15.71
  -4   2  -2  471.75   15.68
   4   2   2  481.85   15.60
  -4  -2  -2  466.26   14.65
  -4  -2  -2  471.94   14.66
  -4  -2  -2  473.77   14.57
  -4   2  -2  472.29   14.68
  -4  -2  -2  454.75   14.54
   4   2   2  493.98   16.26
   4  -2   2  515.72   15.07
   5   2   2   -0.02    0.35
   5  -2   2    0.26    0.38
  -5  -2  -2    0.83    0.38
  -5   2  -2    0.33    0.28
  -5   2  -2    0.26    0.28
  -5  -2  -2    0.45    0.34
  -5  -2  -2    0.48    0.30
  -5  -2  -2    0.55    0.36
   5   2   2    0.92    0.68
  -5  -2  -2   -0.17    0.58
  -5   2  -2    0.34    0.60
   5  -2   2    0.16    0.29
   5  -2   2    0.13    0.24
   5   2   2    0.85    0.47
  -6  -2  -2    6.26    0.63
  -6   2  -2    4.53    0.49
  -6  -2  -2    4.38    0.56
  -6  -2  -2    4.80    0.60
   6   2   2    4.90    0.63
   7   2   2   65.20    2.70
  -7  -2  -2   63.88    2.63
  -7  -2  -2   63.29    2.57
  -7   2  -2   62.53    2.43
  -7  -2  -2   62.12    2.55
   8   2   2   84.35    3.33
  -8  -2  -2   80.97    3.17
  -8   2  -2   77.77    2.99
  -9  -2  -2    4.21    0.67
   9   2   2    3.84    0.78
  -9   2  -2    3.94    0.80
 -10  -2  -2    2.09    0.50
  10   2   2    2.50    0.64
 -10   2  -2    2.07    0.62
  11  -2   2    3.19    0.50
  11   2   2    3.58    0.52
 -11   2  -2    3.78    0.51
  11   3  -2   17.09    0.96
  11  -3  -2   19.21    1.01
 -10  -3   2   14.21    0.98
 -10   3   2   14.46    0.95
 -10  -3   2   15.24    1.03
  10   3  -2   16.43    1.12
  10  -3  -2   15.12    1.10
  -9  -3   2  141.74    4.93
   9  -3  -2  134.36    5.00
   9   3  -2  135.79    5.00
  -9   3   2  131.38    4.80
  -9  -3   2  136.35    4.89
  -9   3   2  138.35    4.74
  -8  -3   2   21.07    1.32
   8  -3  -2   19.09    1.37
   8   3  -2   18.78    1.35
  -8   3   2   21.01    1.25
  -8  -3   2   21.35    1.32
  -8  -3   2   20.03    1.12
  -8   3   2   19.88    1.22
  -7  -3   2   99.29    3.68
   7   3  -2   96.66    3.72
   7  -3  -2   96.52    3.73
  -7  -3   2   95.81    3.63
  -7   3   2   99.34    3.59
  -6  -3   2   29.61    1.48
  -6  -3   2   30.60    1.49
  -6  -3   2   31.69    1.47
  -6   3   2   30.98    1.42
   6  -3  -2   31.27    1.54
   6   3  -2   32.48    1.55
  -5  -3   2  106.48    4.75
  -5   3   2  101.31    4.72
  -5  -3   2  104.38    3.55
   5  -3  -2  104.23    3.65
   5   3  -2  104.83    3.64
  -5  -3   2  102.58    3.61
  -5  -3   2  105.37    3.64
  -5  -3   2  102.54    3.59
   5   3  -2  105.36    5.00
  -5  -3   2   91.90    5.02
   5  -3  -2  102.22    3.67
  -4  -3   2    1.48    0.59
  -4   3   2    1.12    0.54
   4  -3  -2    1.42    0.53
  -4   3   2    0.90    0.26
  -4  -3   2    1.75    0.80
   4   3  -2    0.80    0.48
   4   3  -2    1.34    0.75
   4  -3  -2    1.21    0.21
  -4  -3   2    1.39    0.34
   4  -3  -2    1.59    0.34
   4   3  -2    1.67    0.34
  -4  -3   2    1.51    0.36
  -4  -3   2    1.76    0.34
   4  -3  -2    1.68    0.39
  -4  -3   2    1.86    0.38
  -3   3   2    5.18    0.61
  -3  -3   2    5.75    0.77
  -3   3   2    6.59    0.82
   3  -3  -2    7.05    0.58
  -3  -3   2    5.90    1.11
   3   3  -2    5.43    1.03
   3  -3  -2    6.20    0.49
  -2  -3   2  199.05    6.72
  -2   3   2  200.08    6.73
   2   3  -2  194.04    6.73
   2  -3  -2  203.48    6.57
   2  -3  -2  199.18    6.73
  -2   3   2  193.90    6.63
  -2  -3   2  191.71    7.37
   1  -3  -2  128.77    4.55
   1   3  -2  126.89    4.55
  -1  -3   2  134.37    4.58
   1  -3  -2  133.08    4.64
  -1   3   2  131.93    4.55
  -1   3   2  136.19    4.69
   1   3  -2  135.37    5.09
  -1  -3   2  134.17    5.18
   0   3   2 9880.49  297.39
   0  -3   2 9666.14  297.37
   0   3   2 9939.89  297.59
   0   3   2 9999.00  297.32
   0  -3   2 9892.09  297.33
   0   3  -2 9908.25  297.77
   1   3   2   49.72    2.09
   1  -3   2   47.18    2.07
  -1   3  -2   48.65    2.20
   1   3   2   46.77    2.27
  -1  -3  -2   48.79    2.24
  -1  -3  -2   51.90    2.12
  -1   3  -2   48.26    2.06
   1  -3   2   48.39    2.30
  -2  -3  -2  631.89   19.93
  -2   3  -2  642.99   19.93
  -2  -3  -2  627.16   20.10
  -2   3  -2  643.35   19.79
   2  -3   2  631.71   19.91
   2   3   2  614.47   19.89
   2  -3   2  645.05   19.94
  -3  -3  -2   38.50    2.08
  -3   3  -2   40.95    2.12
   3   3   2   38.27    2.18
  -3   3  -2   40.59    1.75
   3   3   2   39.71    2.12
   3  -3   2   36.94    2.06
   3  -3   2   41.37    1.90
   3   3   2   38.13    2.62
  -4  -3  -2   28.27    1.32
  -4  -3  -2   29.19    1.31
  -4   3  -2   31.95    1.35
  -4  -3  -2   29.80    1.26
  -4  -3  -2   28.91    1.95
   4   3   2   31.69    2.05
  -4   3  -2   28.51    1.92
   4   3   2   27.66    1.91
   4  -3   2   27.34    1.90
  -4  -3  -2   29.14    1.23
   4  -3   2   29.22    1.44
   4   3   2   28.60    2.33
   5   3   2  263.59   10.30
  -5   3  -2  247.89    9.61
   5   3   2  248.22    9.51
  -5  -3  -2  248.86    9.62
   5  -3   2  251.54    8.33
   5   3   2  252.43    8.33
  -5  -3  -2  261.42    8.29
  -5   3  -2  272.94    8.17
  -5  -3  -2  255.29    8.26
  -5  -3  -2  263.70    8.27
  -5   3  -2  255.76    8.22
  -5  -3  -2  259.62    8.36
   6  -3   2    7.36    0.73
   6   3   2    6.87    0.74
  -6  -3  -2    6.64    0.63
  -6  -3  -2    7.18    0.70
  -6   3  -2    7.75    0.57
  -6  -3  -2    7.04    0.70
  -6  -3  -2    6.49    0.70
   7  -3   2   11.90    1.01
   7   3   2   10.02    0.94
  -7   3  -2   11.05    0.75
  -7  -3  -2   12.27    0.94
  -7  -3  -2   11.24    0.95
  -7  -3  -2   11.59    0.93
  -8  -3  -2   37.37    1.80
   8  -3   2   33.10    1.83
   8   3   2   37.08    1.87
  -8   3  -2   37.76    1.86
  -8  -3  -2   36.29    1.86
  -9  -3  -2    3.29    0.65
   9   3   2    4.06    0.73
   9  -3   2    2.66    0.71
  -9   3  -2    3.53    0.78
  -9  -3  -2    2.92    0.74
 -10  -3  -2    1.84    0.50
  10   3   2    1.82    0.55
  10  -3   2    2.26    0.58
 -10  -3  -2    1.35    0.57
 -10   3  -2    1.61    0.59
  11  -3   2    8.16    0.65
  11   3   2    7.41    0.64
 -11   3  -2    8.05    0.66
 -11  -3  -2    7.03    0.63
  11  -4  -2   12.93    0.78
  11   4  -2   11.67    0.75
 -11  -4   2   11.56    0.72
 -10  -4   2  109.43    3.70
 -10   4   2   90.41    3.51
 -10  -4   2   95.50    3.62
  10  -4  -2  105.01    3.76
  10   4  -2  104.74    3.74
  -9   4   2    0.17    0.42
   9   4  -2    0.08    0.54
   9  -4  -2   -0.04    0.53
  -9  -4   2   -0.47    0.61
  -9   4   2    0.65    0.46
  -9  -4   2    0.42    0.56
  -8   4   2    0.20    0.55
   8  -4  -2    0.47    0.59
   8   4  -2    0.43    0.56
  -8   4   2    0.29    0.47
  -8  -4   2    1.36    0.62
  -8  -4   2    1.22    0.40
  -8  -4   2    0.97    0.61
   7   4  -2    0.31    0.49
   7  -4  -2    0.53    0.51
  -7   4   2    1.25    0.47
  -7  -4   2    0.16    0.53
  -7  -4   2    0.54    0.38
  -6  -4   2    8.23    0.69
   6  -4  -2    7.89    0.76
   6   4  -2    9.66    0.81
  -6  -4   2    9.65    0.79
  -6  -4   2    8.47    0.77
  -6  -4   2    9.95    0.80
  -6   4   2    8.63    0.69
   6  -4  -2    8.84    0.85
  -5  -4   2    0.22    0.30
   5  -4  -2    0.15    0.37
  -5  -4   2    0.30    0.39
  -5  -4   2    0.09    0.35
  -5  -4   2   -0.02    0.37
  -5  -4   2    0.92    0.54
  -5   4   2    0.42    0.45
  -5  -4   2    0.51    0.70
   5   4  -2    1.03    0.78
   4   4  -2   32.98    2.05
   4  -4  -2   34.20    2.09
  -4  -4   2   36.70    2.15
  -4   4   2   32.56    2.07
  -4  -4   2   34.22    1.41
   4  -4  -2   36.09    1.44
   4   4  -2   34.04    1.43
  -4  -4   2   34.35    1.49
  -4  -4   2   33.68    1.43
   4  -4  -2   34.01    1.49
   4   4  -2   36.54    2.62
  -4  -4   2   31.89    2.64
  -4  -4   2   34.80    1.46
   3  -4  -2   38.20    1.53
   3   4  -2   34.51    1.91
   3  -4  -2   35.58    1.92
  -3  -4   2   33.15    1.88
  -3   4   2   35.62    1.95
  -3  -4   2   35.50    1.44
  -3  -4   2   33.79    1.37
  -3  -4   2   33.65    1.38
   3  -4  -2   36.40    1.43
  -3   4   2   32.83    1.57
  -3  -4   2   32.85    2.49
   3   4  -2   34.80    2.41
  -2  -4   2  380.20   13.35
  -2  -4   2  396.52   12.48
  -2   4   2  391.38   12.49
   2  -4  -2  390.03   12.49
   2  -4  -2  393.70   12.35
  -2   4   2  384.40   12.41
   2   4  -2  377.15   12.48
  -1  -4   2   63.63    3.25
   1   4  -2   64.64    3.13
  -1  -4   2   65.26    2.55
  -1   4   2   68.27    2.56
  -1   4   2   63.30    2.70
   1  -4  -2   68.51    2.73
   0   4  -2  132.76    5.02
   0   4   2  135.56    4.54
   0  -4   2  130.19    4.51
   0   4   2  129.44    4.80
   0  -4  -2  132.45    4.80
   0  -4   2  126.74    4.45
   0   4   2  131.01    4.46
   1  -4   2 1369.71   41.67
   1   4   2 1356.87   41.19
  -1   4  -2 1341.24   41.48
   1   4   2 1344.06   41.60
   1  -4   2 1340.89   41.18
  -1  -4  -2 1373.95   41.57
  -1  -4  -2 1352.88   41.20
  -1   4  -2 1320.41   41.19
   2   4   2  510.50   16.70
   2  -4   2  507.70   15.83
  -2  -4  -2  513.03   15.74
  -2   4  -2  489.84   15.71
   2   4   2  466.34   16.04
   2  -4   2  488.82   15.68
   2   4   2  477.56   15.67
  -2   4  -2  495.14   15.62
  -3  -4  -2  432.42   13.73
  -3   4  -2  422.48   13.70
  -3   4  -2  419.41   13.17
   3   4   2  445.16   14.09
   3   4   2  419.30   13.68
   3  -4   2  417.09   13.68
  -3  -4  -2  409.39   12.85
  -3  -4  -2  415.69   12.96
   3  -4   2  398.41   12.86
   3   4   2  452.96   14.79
   3  -4   2  439.16   13.42
  -4  -4  -2  295.23    9.13
  -4   4  -2  295.15    8.99
   4  -4   2  290.42    9.05
  -4  -4  -2  311.68   10.21
  -4   4  -2  302.27   10.16
   4   4   2  311.39   10.46
   4   4   2  288.98   10.07
   4  -4   2  292.80   10.11
  -4  -4  -2  303.12    8.99
   4   4   2  284.74   11.06
   5   4   2   75.11    4.64
  -5  -4  -2   85.78    4.21
  -5   4  -2   76.58    4.07
   5   4   2   75.70    4.14
   5  -4   2   85.40    3.08
   5   4   2   83.78    3.06
  -5  -4  -2   86.56    3.08
  -5  -4  -2   81.16    3.01
  -5  -4  -2   83.86    3.01
  -5  -4  -2   87.41    3.14
   6  -4   2   26.59    1.39
   6   4   2   24.25    1.35
  -6  -4  -2   24.82    1.31
  -6  -4  -2   27.87    1.36
  -6  -4  -2   24.42    1.32
  -6  -4  -2   24.32    1.37
  -7  -4  -2    3.40    0.65
   7   4   2    2.13    0.57
   7  -4   2    3.19    0.65
  -7  -4  -2    2.14    0.61
  -7  -4  -2    2.28    0.51
  -7  -4  -2    2.76    0.59
  -8  -4  -2   31.94    1.69
   8  -4   2   30.84    1.72
   8   4   2   33.75    1.76
  -8  -4  -2   33.42    1.76
  -8   4  -2   33.21    1.75
  -8  -4  -2   28.45    1.60
  -9   4  -2    0.84    0.63
  -9  -4  -2    1.09    0.62
   9   4   2    0.90    0.58
   9  -4   2    1.52    0.62
  -9  -4  -2    1.04    0.58
 -10   4  -2   17.08    1.10
 -10  -4  -2   15.69    1.08
  10   4   2   13.95    1.03
  10  -4   2   14.25    1.03
 -10  -4  -2   15.08    1.00
  11   4   2    1.22    0.34
  11  -4   2    1.37    0.35
 -11   4  -2    2.10    0.39
 -11  -4  -2    1.33    0.37
 -10   5   2    6.54    0.61
 -10  -5   2    7.44    0.74
  10  -5  -2    7.79    0.76
  10   5  -2    7.06    0.73
  -9  -5   2   72.90    2.96
  -9   5   2   71.28    2.78
  -9   5   2   68.24    2.77
  -9  -5   2   75.86    2.95
   9   5  -2   71.12    2.92
   9  -5  -2   69.54    2.93
   8  -5  -2   71.57    2.94
   8   5  -2   76.87    2.97
  -8  -5   2   75.43    2.99
  -8   5   2   71.80    2.85
  -8   5   2   72.96    2.79
  -8  -5   2   71.69    2.91
   7  -5  -2    8.42    0.84
   7   5  -2    8.85    0.85
  -7  -5   2   10.23    0.96
  -7  -5   2    8.31    0.82
  -7  -5   2    7.33    0.86
  -7   5   2    8.96    0.77
  -7  -5   2    8.21    0.72
   6  -5  -2   23.62    1.28
   6   5  -2   23.12    1.27
  -6  -5   2   21.79    1.16
  -6  -5   2   22.20    1.28
  -6  -5   2   22.62    1.31
  -6  -5   2   22.34    1.26
  -6  -5   2   22.06    1.17
   6  -5  -2   22.31    1.35
   5  -5  -2    0.52    0.36
   5   5  -2    0.16    0.32
  -5  -5   2    0.39    0.32
  -5  -5   2    0.51    0.55
  -5   5   2    0.09    0.45
  -5  -5   2    0.46    0.40
  -5  -5   2    0.49    0.40
  -5  -5   2    0.19    0.41
   5  -5  -2    0.25    0.43
  -5  -5   2    0.33    0.34
   4  -5  -2  127.78    4.16
   4   5  -2  130.92    4.18
  -4  -5   2  117.43    4.14
  -4  -5   2  123.80    4.19
  -4  -5   2  117.54    6.10
   4  -5  -2  125.11    4.26
   4   5  -2  116.17    5.84
  -4  -5   2  123.63    4.21
  -4  -5   2  123.28    4.26
  -4  -5   2  122.43    4.20
   4   5  -2  121.16    5.05
   4  -5  -2  125.91    5.09
  -4  -5   2  126.06    5.08
  -4   5   2  123.57    5.08
  -3  -5   2  118.18    3.98
  -3  -5   2  121.11    3.96
  -3  -5   2  120.67    4.04
  -3   5   2  119.46    4.16
  -3  -5   2  111.98    3.94
  -3  -5   2  121.82    5.66
  -3   5   2  119.20    4.29
   3   5  -2  114.39    5.46
   3  -5  -2  116.49    3.99
  -3  -5   2  119.14    4.59
   3   5  -2  120.23    4.61
   3  -5  -2  126.91    4.65
  -3   5   2  124.74    4.67
  -2  -5   2   86.62    3.09
  -2   5   2   87.31    3.44
  -2  -5   2   91.25    3.46
  -2   5   2   92.16    3.48
   2  -5  -2   95.54    3.51
   2   5  -2   87.97    3.46
   2   5  -2   92.04    4.29
  -2  -5   2   92.01    4.44
  -1  -5   2  159.89    5.45
  -1   5   2  165.85    5.46
  -1   5   2  162.47    5.74
   1  -5  -2  167.53    5.75
  -1   5   2  162.67    5.52
  -1  -5   2  153.95    5.48
   1   5  -2  156.80    6.27
   0   5   2   87.02    3.14
   0  -5   2   83.35    3.11
   0   5   2   83.69    3.51
   0  -5   2   84.89    3.07
   0   5   2   87.94    3.08
   0   5  -2   81.34    3.73
   0  -5   2   88.95    3.93
   1   5   2  589.62   18.64
   1  -5   2  593.30   18.64
   1   5   2  599.53   19.23
   1  -5   2  619.20   19.38
  -1   5  -2  598.32   19.13
   1   5   2  610.64   19.85
  -2  -5  -2  191.91    6.45
  -2   5  -2  192.91    6.44
  -2   5  -2  177.32    6.40
   2   5   2  184.25    6.92
   2   5   2  182.72    6.38
   2  -5   2  183.10    6.38
   2  -5   2  179.45    5.84
   2   5   2  190.26    7.59
   2  -5   2  193.91    6.71
   3  -5   2   75.81    2.71
  -3  -5  -2   77.21    2.82
  -3  -5  -2   78.19    2.70
   3  -5   2   85.82    3.27
  -3  -5  -2   78.73    2.69
  -3  -5  -2   84.56    3.47
  -3   5  -2   80.55    3.42
  -3   5  -2   73.14    2.92
   3   5   2   78.12    3.36
   3  -5   2   78.91    3.39
   4   5   2  839.24   29.43
   4   5   2  902.50   28.68
  -4  -5  -2  907.96   28.25
  -4   5  -2  906.50   28.24
   4   5   2  809.97   28.01
   4  -5   2  872.49   28.17
   4  -5   2  880.16   27.03
   4   5   2  899.68   27.03
  -4  -5  -2  891.34   27.13
  -4  -5  -2  899.14   27.02
  -4  -5  -2  880.20   27.15
   4  -5   2  893.56   27.07
  -4   5  -2  868.09   27.00
   5  -5   2  142.75    4.56
   5  -5   2  133.65    4.64
   5   5   2  136.07    4.64
  -5  -5  -2  133.59    5.91
  -5   5  -2  125.81    5.80
  -5  -5  -2  135.46    4.71
  -5  -5  -2  133.98    4.62
  -5  -5  -2  137.13    4.75
  -6  -5  -2    0.43    0.48
   6   5   2    0.69    0.44
   6  -5   2    0.67    0.43
  -6  -5  -2    0.79    0.44
  -6  -5  -2    0.34    0.45
  -6  -5  -2    0.43    0.49
  -7  -5  -2    3.77    0.70
   7   5   2    4.04    0.67
   7  -5   2    3.99    0.67
  -7  -5  -2    5.37    0.75
  -7  -5  -2    4.43    0.63
  -7  -5  -2    4.41    0.73
  -8  -5  -2   16.14    1.20
   8  -5   2   17.43    1.20
   8   5   2   14.27    1.12
  -8  -5  -2   15.91    1.20
  -8   5  -2   16.67    1.24
  -8  -5  -2   13.27    1.08
  -9  -5  -2   14.53    1.15
  -9   5  -2   15.77    1.19
   9   5   2   17.68    1.17
   9  -5   2   14.35    1.09
  -9  -5  -2   18.17    1.22
  10  -5   2   -0.22    0.40
  10   5   2    0.27    0.40
 -10   5  -2    0.20    0.47
 -10  -5  -2    0.55    0.47
 -10  -5  -2    0.22    0.43
 -10  -6   2   35.47    1.63
  10   6  -2   32.67    1.54
  10  -6  -2   33.95    1.57
  -9   6   2    0.51    0.49
  -9  -6   2    0.44    0.57
   9   6  -2    0.23    0.45
   9  -6  -2    0.27    0.45
  -9   6   2    0.47    0.42
  -9  -6   2   -0.37    0.58
  -8   6   2  760.61   24.19
  -8  -6   2  829.68   24.43
   8  -6  -2  777.45   24.35
   8   6  -2  746.52   24.29
  -8  -6   2  809.64   24.44
   7  -6  -2   53.52    2.36
   7   6  -2   54.00    2.35
  -7  -6   2   56.74    2.47
  -7  -6   2   57.91    2.46
  -7  -6   2   53.30    2.40
  -7   6   2   54.69    2.26
   7  -6  -2   56.82    2.51
  -7  -6   2   50.89    2.17
   6  -6  -2   -0.14    0.56
  -6  -6   2    0.37    0.38
   6  -6  -2    0.41    0.38
   6   6  -2    0.90    0.43
  -6  -6   2    0.63    0.40
  -6  -6   2    0.72    0.55
  -6  -6   2    1.47    0.57
  -6  -6   2    0.09    0.50
   5   6  -2   16.82    0.95
   5  -6  -2   16.29    0.93
  -5  -6   2   15.40    0.96
  -5  -6   2   13.48    1.47
  -5   6   2   14.90    1.53
  -5  -6   2   16.05    1.03
  -5  -6   2   15.60    1.07
  -5  -6   2   15.60    1.00
  -5  -6   2   14.91    0.92
   5  -6  -2   16.33    1.05
  -4  -6   2    0.51    0.33
   4  -6  -2    0.43    0.37
   4   6  -2    0.37    0.28
   4  -6  -2    0.41    0.29
  -4  -6   2    0.95    0.39
  -4  -6   2    0.33    0.36
  -4  -6   2    0.24    0.39
  -4  -6   2    0.19    0.43
  -4   6   2    0.53    0.43
   4   6  -2    0.45    0.41
   4  -6  -2    0.46    0.39
  -3  -6   2   58.79    2.62
  -3   6   2   57.21    2.62
   3  -6  -2   57.50    2.62
   3   6  -2   54.38    2.57
  -3  -6   2   56.46    2.12
   3  -6  -2   53.22    1.96
  -3  -6   2   55.52    2.07
  -3  -6   2   55.02    2.14
  -3  -6   2   56.08    2.07
  -3   6   2   47.20    2.15
  -3  -6   2   55.07    2.04
  -3  -6   2   60.80    3.76
  -3   6   2   50.18    2.28
   3  -6  -2   54.47    2.09
  -2  -6   2   80.32    2.94
   2  -6  -2   86.18    2.91
  -2  -6   2   83.23    2.89
  -2   6   2   88.05    3.73
  -2  -6   2   84.03    4.48
   2   6  -2   83.14    4.27
  -2  -6   2   82.43    2.88
  -2  -6   2   80.41    2.97
  -2  -6   2   81.37    2.89
   2  -6  -2   85.78    3.27
   2   6  -2   85.76    3.27
  -2  -6   2   86.57    3.28
  -2   6   2   90.19    3.44
  -2   6   2   89.53    3.32
  -1  -6   2 1056.05   32.29
   1   6  -2 1025.09   33.71
  -1   6   2 1121.05   33.65
  -1   6   2 1084.03   32.55
  -1  -6   2 1052.51   32.53
  -1  -6   2 1085.00   32.47
  -1   6   2 1137.03   32.52
  -1   6   2 1060.96   32.99
  -1  -6   2 1025.91   32.27
  -1  -6   2 1030.38   32.21
   0  -6   2    2.34    0.36
   0   6   2    2.79    0.40
   0   6   2    2.62    0.40
   0   6   2    2.38    0.79
   0  -6   2    3.29    0.42
   0  -6   2    1.28    0.81
   0   6  -2    2.26    0.82
   0  -6   2    3.50    0.40
   0   6   2    2.73    0.65
   1  -6   2  361.44   11.92
   1  -6   2  399.29   13.16
   1   6   2  401.74   13.71
  -1   6  -2  372.00   12.81
   1  -6   2  402.70   11.86
   1   6   2  387.59   12.11
   1  -6   2  369.93   12.07
   1   6   2  388.29   12.14
   1  -6   2  382.85   12.13
   1   6   2  383.21   12.94
   2  -6   2   12.95    0.71
   2  -6   2   11.22    0.76
  -2   6  -2   13.01    1.08
   2   6   2   13.37    1.37
   2   6   2   12.87    0.96
   2  -6   2   11.30    0.92
   2   6   2   10.27    1.59
  -2  -6  -2   13.44    1.00
  -2   6  -2   13.05    0.99
   2  -6   2   13.42    1.28
   2  -6   2   13.13    0.71
  -3  -6  -2   13.57    0.86
   3  -6   2   12.61    0.76
  -3   6  -2   12.63    0.75
  -3  -6  -2   13.22    0.73
  -3  -6  -2   13.64    1.16
  -3   6  -2   12.33    1.11
  -3   6  -2   12.22    0.89
   3   6   2   12.44    1.08
   3  -6   2   12.37    1.10
  -3  -6  -2   12.19    0.71
   3  -6   2   14.21    1.10
   4   6   2  400.07   12.80
   4  -6   2  422.49   12.84
  -4  -6  -2  423.65   12.86
  -4  -6  -2  421.76   12.99
   4  -6   2  408.25   12.90
  -4  -6  -2  412.14   13.00
  -4   6  -2  401.34   12.82
  -4  -6  -2  434.94   12.87
  -4  -6  -2  411.46   13.96
  -4   6  -2  403.46   13.91
   4   6   2  361.96   13.71
   4  -6   2  391.96   13.85
   5  -6   2   87.65    3.07
   5  -6   2   87.95    3.13
   5   6   2   82.12    3.08
  -5  -6  -2   84.33    3.22
  -5  -6  -2   82.18    3.11
  -5  -6  -2   85.77    3.26
   5  -6   2   84.88    3.21
  -6  -6  -2    8.85    0.87
   6   6   2    8.36    0.76
   6  -6   2    8.53    0.76
  -6  -6  -2    8.60    0.85
  -6  -6  -2    9.65    0.83
   6  -6   2    8.55    0.69
  -7  -6  -2   12.16    0.98
  -7  -6  -2   11.97    1.03
   7   6   2   10.17    0.89
   7  -6   2   11.50    0.92
  -7  -6  -2   10.44    0.97
  -7  -6  -2   10.31    1.00
  -8  -6  -2    7.29    0.91
   8  -6   2    5.81    0.76
   8   6   2    6.59    0.76
  -8  -6  -2    7.67    0.88
  -8  -6  -2    6.33    0.72
  -8   6  -2    7.17    0.95
  -8  -6  -2    5.70    0.79
   9   6   2    1.34    0.50
   9  -6   2    1.45    0.51
  -9   6  -2    1.96    0.66
  -9  -6  -2    2.11    0.63
  -9  -6  -2    1.78    0.65
 -10  -6  -2   75.38    2.71
 -10   6  -2   78.34    2.73
 -10  -6  -2   70.18    2.67
  10   6   2   61.38    2.53
  10  -6   2   62.42    2.54
 -10  -7   2   20.61    1.13
  -9   7   2    0.50    0.46
   9  -7  -2    0.20    0.39
   9   7  -2   -0.06    0.36
  -9   7   2    0.15    0.38
  -9  -7   2    0.23    0.50
  -9  -7   2   -0.39    0.58
  -8  -7   2   96.47    3.59
  -8  -7   2   89.98    3.49
  -8   7   2   83.88    3.28
   8   7  -2   81.58    3.31
   8  -7  -2   90.04    3.40
  -7  -7   2  119.97    4.48
   7  -7  -2  128.94    4.58
   7   7  -2  123.83    4.53
  -7  -7   2  135.82    4.75
  -7  -7   2  132.93    4.68
  -7  -7   2  136.71    4.76
  -7   7   2  128.44    4.49
  -7  -7   2  120.77    4.37
   7  -7  -2  121.35    4.71
   6  -7  -2    0.92    0.61
  -6  -7   2    0.59    0.39
  -6  -7   2    1.21    0.50
   6  -7  -2    1.56    0.45
   6   7  -2    1.28    0.44
  -6  -7   2    0.98    0.58
  -6  -7   2    0.72    0.57
  -6  -7   2    1.10    0.56
   5  -7  -2   10.13    0.73
   5   7  -2    8.82    0.69
  -5  -7   2   10.38    0.83
  -5  -7   2    9.83    0.90
  -5  -7   2    9.64    0.84
  -5  -7   2   10.07    0.75
   4  -7  -2  192.41    6.33
  -4  -7   2  198.20    6.53
  -4  -7   2  213.47    6.45
   4  -7  -2  198.21    6.53
  -4  -7   2  196.17    6.49
  -4  -7   2  196.46    6.59
  -4  -7   2  194.70    6.49
  -4  -7   2  181.79    7.21
   4  -7  -2  178.13    7.18
   3  -7  -2  263.79    9.02
  -3  -7   2  268.47    9.04
  -3   7   2  264.17    9.06
  -3  -7   2  269.30    8.54
   3  -7  -2  263.75    8.35
  -3  -7   2  265.48    8.46
  -3  -7   2  264.94    8.57
  -3  -7   2  259.56    8.47
  -3  -7   2  268.09    8.44
  -2  -7   2  949.63   28.98
   2  -7  -2  957.99   28.91
  -2   7   2  952.34   30.05
  -2  -7   2  959.86   31.38
  -2  -7   2  938.64   28.89
   2   7  -2  940.71   30.97
  -2  -7   2  945.83   28.88
  -2  -7   2  932.32   28.90
  -2   7   2  975.12   29.61
  -2  -7   2  966.56   29.24
  -2   7   2  958.84   29.26
  -2   7   2  965.52   29.33
  -2  -7   2  902.28   29.28
  -1  -7   2    4.65    0.51
   1  -7  -2    3.62    0.43
  -1  -7   2    4.99    0.48
  -1   7   2    4.26    0.44
  -1   7   2    3.84    0.44
  -1   7   2    3.99    0.98
  -1  -7   2    4.23    1.15
   1   7  -2    3.91    1.03
  -1  -7   2    4.54    0.44
  -1   7   2    4.29    0.73
  -1  -7   2    3.81    0.47
  -1  -7   2    4.74    0.48
   0   7  -2   18.16    1.66
   0  -7   2   16.65    0.86
   0   7   2   15.69    1.66
   0  -7   2   17.92    1.79
   0  -7   2   16.65    0.88
   0  -7   2   16.71    0.84
   0  -7   2   17.34    0.83
   0   7   2   16.74    0.83
   0   7   2   16.69    0.84
   0  -7   2   15.92    0.82
   0   7   2   16.19    1.40
   1   7   2   28.89    2.01
   1   7   2   26.76    1.26
   1  -7   2   27.19    1.27
   1  -7   2   28.04    1.25
   1   7   2   27.98    1.26
  -1  -7  -2   27.83    1.24
   1  -7   2   27.99    1.28
   1  -7   2   27.40    1.19
   1  -7   2   27.99    1.23
   1   7   2   30.51    2.50
   1  -7   2   30.15    2.17
  -1   7  -2   29.99    2.00
   2   7   2   24.67    1.95
   2   7   2   22.39    1.29
   2  -7   2   24.29    1.32
  -2   7  -2   23.61    1.62
  -2  -7  -2   21.40    1.31
  -2   7  -2   23.68    1.35
  -2  -7  -2   24.47    1.20
   2  -7   2   25.78    1.12
  -2  -7  -2   23.05    1.02
   2  -7   2   23.66    1.20
  -2  -7  -2   24.16    1.06
   2   7   2   23.66    2.35
   2  -7   2   24.70    1.13
   2  -7   2   26.75    1.89
  -3  -7  -2   72.96    3.22
  -3   7  -2   72.83    3.20
   3  -7   2   70.11    3.14
  -3  -7  -2   79.33    2.82
  -3   7  -2   73.17    2.64
   3  -7   2   68.33    2.63
  -3  -7  -2   75.04    2.60
  -3  -7  -2   73.55    2.76
  -3  -7  -2   71.92    2.60
   3  -7   2   70.57    3.18
   4  -7   2    0.30    0.25
  -4  -7  -2    0.44    0.47
  -4  -7  -2    0.14    0.36
   4  -7   2    0.26    0.41
  -4  -7  -2    0.31    0.36
  -4  -7  -2    0.43    0.46
   4  -7   2    0.40    0.41
  -4  -7  -2    0.44    0.34
  -4   7  -2    0.60    0.33
  -5  -7  -2  401.37   12.76
   5   7   2  364.11   12.45
   5  -7   2  395.40   12.52
  -5  -7  -2  398.09   12.59
  -5  -7  -2  395.24   12.72
  -5  -7  -2  401.33   12.60
   5  -7   2  390.88   12.67
  -6  -7  -2   14.69    1.15
   6   7   2   12.35    0.89
   6  -7   2   11.85    0.89
  -6  -7  -2   13.55    1.07
  -6  -7  -2   13.77    1.02
   6  -7   2   13.63    0.91
  -7  -7  -2    5.78    0.84
   7  -7   2    6.38    0.70
   7   7   2    5.61    0.69
  -7  -7  -2    6.42    0.78
  -7  -7  -2    5.98    0.81
  -8  -7  -2    1.69    0.58
   8   7   2    1.92    0.49
   8  -7   2    1.70    0.51
  -8  -7  -2    2.85    0.73
  -8  -7  -2    1.91    0.54
  -8  -7  -2    1.29    0.67
  -9  -7  -2    0.89    0.42
   9  -7   2    0.83    0.41
   9   7   2    0.78    0.39
  -9  -7  -2    0.90    0.57
  -9  -7  -2    0.33    0.50
  -9   7  -2    1.11    0.59
 -10  -7  -2    1.47    0.46
 -10   7  -2    2.14    0.48
 -10  -7  -2    1.29    0.43
 -10  -8   2    3.50    0.50
  -9  -8   2    0.50    0.54
  -9  -8   2    0.67    0.50
  -9   8   2    0.16    0.45
  -8  -8   2   34.22    1.79
  -8   8   2   30.39    1.55
   8  -8  -2   33.58    1.61
  -7  -8   2  223.62    7.72
   7  -8  -2  228.28    7.65
  -7  -8   2  242.05    7.93
  -7  -8   2  238.89    7.94
  -7  -8   2  248.67    7.89
  -7   8   2  223.18    7.61
  -7  -8   2  221.19    7.52
   7  -8  -2  242.01    7.97
  -6  -8   2  233.68    7.77
   6  -8  -2  224.61    7.58
  -6  -8   2  236.45    7.91
  -6  -8   2  230.39    7.77
  -6  -8   2  236.16    7.59
   6  -8  -2  225.93    7.83
   5  -8  -2    5.30    0.77
  -5  -8   2    6.24    0.63
  -5  -8   2    5.84    0.72
   5  -8  -2    4.30    0.50
  -5  -8   2    5.23    0.73
  -5  -8   2    6.00    0.81
  -5  -8   2    4.49    0.70
   4  -8  -2   93.27    3.37
  -4  -8   2   94.79    3.54
  -4  -8   2   97.06    3.50
  -4  -8   2   94.11    3.61
  -4  -8   2   95.06    3.50
  -4  -8   2   94.89    3.42
   4  -8  -2   98.10    3.54
   3  -8  -2   26.67    1.22
  -3  -8   2   27.95    1.42
  -3  -8   2   25.39    1.53
  -3  -8   2   29.26    1.34
  -3  -8   2   29.59    1.45
  -3  -8   2   28.70    1.37
  -3  -8   2   27.71    1.30
   2  -8  -2  272.31    8.39
  -2  -8   2  263.82    8.60
  -2  -8   2  245.93    8.59
  -2   8   2  271.39    9.25
  -2  -8   2  262.17    8.59
  -2  -8   2  278.07    8.50
  -2  -8   2  283.20    8.54
   2  -8  -2  259.57    8.51
  -2  -8   2  260.65    8.49
  -2   8   2  270.45    9.69
   1  -8  -2   62.68    2.23
  -1  -8   2   64.75    2.46
  -1   8   2   62.14    3.11
   1  -8  -2   63.73    2.29
  -1  -8   2   63.65    2.29
  -1  -8   2   66.01    2.44
  -1  -8   2   61.79    2.34
  -1  -8   2   70.74    4.17
   1   8  -2   62.60    3.73
  -1   8   2   63.66    3.61
   1  -8  -2   62.24    2.32
   0  -8  -2    6.35    0.52
   0  -8   2    4.95    0.60
   0  -8   2    6.90    1.28
   0   8   2    6.46    1.18
   0   8  -2    6.43    1.15
   0   8   2    5.51    0.89
   0  -8  -2    5.55    0.53
   0  -8   2    5.75    0.55
   0  -8   2    6.16    0.54
   0  -8  -2    5.33    0.44
   0  -8   2    5.84    0.56
   1  -8   2   31.64    1.19
   1  -8   2   31.37    1.29
  -1  -8  -2   32.67    1.26
   1   8   2   29.20    2.08
  -1  -8  -2   29.21    1.21
   1  -8   2   28.36    1.14
  -1  -8  -2   33.08    1.12
   1  -8   2   32.88    1.23
   1  -8   2   35.22    2.43
   1   8   2   34.46    2.69
  -1   8  -2   34.27    2.18
   2  -8   2   14.60    0.86
   2  -8   2   16.02    0.95
  -2  -8  -2   15.45    0.96
  -2  -8  -2   15.10    0.77
  -2   8  -2   15.26    1.33
   2  -8   2   13.28    0.85
   2  -8   2   12.71    0.82
  -2  -8  -2   15.41    0.82
   2  -8   2   16.76    1.58
   2  -8   2   14.82    0.87
  -3  -8  -2    2.96    0.53
  -3  -8  -2    3.83    0.45
  -3  -8  -2    3.23    0.56
   3  -8   2    3.41    0.51
  -3  -8  -2    4.22    0.47
  -4  -8  -2  119.40    4.14
  -4  -8  -2  121.19    4.34
   4  -8   2  116.30    4.22
  -4  -8  -2  120.76    4.17
  -4  -8  -2  120.32    4.34
   5  -8   2   11.27    0.86
  -5  -8  -2   11.87    1.02
   5  -8   2   11.28    0.75
  -5  -8  -2   12.41    0.90
  -5  -8  -2   11.67    1.01
  -5  -8  -2   11.59    0.89
   5  -8   2   12.36    1.03
  -6  -8  -2   65.05    2.90
   6  -8   2   65.74    2.60
  -6  -8  -2   69.05    2.78
  -6  -8  -2   69.21    2.89
  -6  -8  -2   68.63    2.80
   6  -8   2   67.81    2.69
   7  -8   2    6.80    0.70
  -7  -8  -2    6.62    0.91
  -7  -8  -2    9.19    0.94
  -7  -8  -2    7.52    0.88
   7  -8   2    6.63    0.68
  -8  -8  -2  181.22    6.09
  -8  -8  -2  175.92    6.01
  -8  -8  -2  186.76    6.08
  -9  -8  -2    8.58    0.83
  -9  -8  -2    5.84    0.65
  -9  -8  -2    6.87    0.76
  -9   8  -2    8.34    0.80
 -10   8  -2   17.99    0.99
 -10  -8  -2   16.45    0.96
 -10  -8  -2   17.53    1.01
  -9  -9   2    7.48    0.79
  -9  -9   2    6.33    0.72
  -9   9   2    6.18    0.66
  -8  -9   2   12.30    1.04
  -8  -9   2   14.20    1.14
   7  -9  -2   37.74    2.00
  -7  -9   2   33.54    1.80
  -7  -9   2   39.40    2.03
  -7  -9   2   41.77    1.99
  -7   9   2   34.93    1.69
   6  -9  -2   87.93    3.66
  -6  -9   2   93.32    3.39
  -6  -9   2   96.53    3.76
  -6  -9   2   86.24    3.55
  -6  -9   2   94.51    3.61
  -5  -9   2    0.63    0.59
  -5  -9   2    0.51    0.56
  -5  -9   2    0.66    0.56
  -5  -9   2    0.78    0.64
   5  -9  -2    0.91    0.61
  -5  -9   2    1.08    0.44
  -4  -9   2   26.45    1.47
   4  -9  -2   25.10    1.28
  -4  -9   2   25.71    1.39
  -4  -9   2   28.29    1.44
  -4  -9   2   27.02    1.53
   4  -9  -2   23.72    1.39
  -4  -9   2   25.15    1.32
  -3  -9   2    6.30    0.71
  -3  -9   2    6.39    0.70
   3  -9  -2    6.46    0.56
  -3  -9   2    7.65    0.67
  -3  -9   2    6.76    0.79
  -3  -9   2    6.23    0.64
  -2  -9   2  113.09    3.91
   2  -9  -2  107.60    3.64
  -2  -9   2  108.29    3.73
  -2  -9   2  108.21    3.89
  -2  -9   2  103.92    3.79
   2  -9  -2  100.94    3.75
  -2  -9   2  109.10    3.77
  -1   9   2  183.43    7.18
   1  -9  -2  183.12    6.00
   1  -9  -2  185.42    5.98
   1  -9  -2  188.71    6.05
  -1  -9   2  189.21    6.13
  -1  -9   2  184.90    6.19
   1  -9  -2  185.77    6.08
  -1   9   2  180.99    7.79
   0  -9  -2  358.93   11.17
   0  -9   2  351.79   11.29
   0  -9   2  371.92   13.59
   0  -9   2  358.30   11.19
   0   9   2  339.71   13.29
   0   9  -2  334.79   12.93
   0  -9  -2  352.42   11.18
   0  -9   2  347.33   11.16
   0  -9  -2  359.30   11.06
   0  -9   2  357.60   11.22
   0   9   2  346.37   12.57
   1  -9   2    9.89    1.46
  -1   9  -2   10.20    1.32
   1  -9   2   11.13    0.75
  -1  -9  -2    8.76    0.74
   1  -9   2   10.55    0.80
  -1  -9  -2   10.52    0.78
  -1  -9  -2   11.60    0.69
   1  -9   2   10.03    0.72
   1  -9   2   10.89    0.78
   2  -9   2   24.90    1.19
  -2  -9  -2   21.26    0.99
  -2  -9  -2   21.98    1.22
   2  -9   2   20.27    1.19
  -2  -9  -2   20.74    1.19
  -2  -9  -2   22.22    1.08
   2  -9   2   18.58    1.83
  -3  -9  -2   19.92    1.03
  -3  -9  -2   21.53    1.11
   3  -9   2   19.96    1.15
  -4  -9  -2    2.33    0.46
  -4  -9  -2    0.93    0.59
  -4  -9  -2    1.91    0.59
  -4  -9  -2    1.61    0.46
   4  -9   2    1.16    0.53
   5  -9   2    3.06    0.74
  -5  -9  -2    3.17    0.58
  -5  -9  -2    4.13    0.62
  -5  -9  -2    3.34    0.77
  -5  -9  -2    2.73    0.71
   5  -9   2    2.70    0.56
  -6  -9  -2    0.17    0.53
  -6  -9  -2    0.07    0.53
  -6  -9  -2    0.47    0.67
  -6  -9  -2    0.33    0.65
   6  -9   2    0.26    0.44
  -7  -9  -2   87.51    3.36
  -7  -9  -2   88.38    3.45
  -7  -9  -2   86.38    3.36
   7  -9   2   78.24    3.15
  -7  -9  -2   80.30    3.45
  -8  -9  -2   16.21    1.17
  -8  -9  -2   15.21    1.13
  -8  -9  -2   15.57    1.12
  -9  -9  -2   67.31    2.67
  -9  -9  -2   71.48    2.76
  -9   9  -2   75.40    2.80
  -9  10   2    5.02    0.59
  -9 -10   2    4.72    0.62
  -8 -10   2    6.01    0.81
  -7 -10   2   93.92    3.68
  -7 -10   2   91.69    3.61
  -7 -10   2   95.54    3.67
  -7 -10   2   96.76    3.79
  -7  10   2   88.78    3.38
   7 -10  -2   94.56    3.73
  -6 -10   2  170.89    6.01
  -6 -10   2  173.34    6.04
  -6 -10   2  167.96    6.00
  -6 -10   2  177.33    6.19
  -6 -10   2  160.67    5.70
   6 -10  -2  175.05    6.08
  -5 -10   2    4.35    0.79
  -5 -10   2    5.16    0.75
  -5 -10   2    3.86    0.75
  -5 -10   2    5.40    0.90
   5 -10  -2    5.02    0.84
  -5 -10   2    4.81    0.63
   4 -10  -2  190.44    6.43
  -4 -10   2  191.10    6.54
  -4 -10   2  199.15    6.70
  -4 -10   2  200.67    6.64
  -4 -10   2  203.78    6.79
  -4 -10   2  189.23    6.45
   4 -10  -2  182.30    6.57
   3 -10  -2  304.30   10.00
  -3 -10   2  311.82   10.12
  -3 -10   2  321.40   10.31
  -3 -10   2  319.04   10.22
  -3 -10   2  322.48   10.11
   2 -10  -2    5.74    0.54
  -2 -10   2    5.16    0.66
  -2 -10   2    5.78    0.57
  -2 -10   2    6.09    0.78
   2 -10  -2    5.42    0.64
  -2 -10   2    5.06    0.61
  -2 -10   2    6.09    0.77
  -1 -10   2    4.71    0.61
   1 -10  -2    3.72    0.43
   1 -10  -2    4.42    0.48
  -1 -10   2    3.85    0.61
   1 -10  -2    4.07    0.52
  -1 -10   2    4.90    0.64
   1 -10  -2    3.89    0.46
   0 -10  -2    0.10    0.36
   0 -10   2    0.31    0.48
   0 -10  -2    0.10    0.36
   0 -10   2    0.38    0.39
   0 -10  -2    0.12    0.28
   0 -10   2    0.03    0.40
   1 -10   2   97.62    3.54
  -1 -10  -2   98.32    3.61
   1 -10   2   98.02    3.69
  -1 -10  -2   96.37    3.61
  -1 -10  -2  101.34    3.47
   1 -10   2  101.69    3.59
  -2 -10  -2    4.11    0.43
   2 -10   2    5.05    0.64
  -2 -10  -2    4.85    0.66
   2 -10   2    5.61    0.65
  -2 -10  -2    4.99    0.54
  -2 -10  -2    4.72    0.67
  -3 -10  -2    9.31    0.68
  -3 -10  -2    9.67    0.76
   3 -10   2    8.89    0.80
  -4 -10  -2   40.43    1.81
  -4 -10  -2   43.79    2.09
  -4 -10  -2   41.67    2.09
  -4 -10  -2   41.20    1.87
   4 -10   2   39.95    1.94
   5 -10   2   15.89    1.24
  -5 -10  -2   15.53    1.31
  -5 -10  -2   16.04    1.12
   5 -10   2   16.23    1.11
  -5 -10  -2   16.92    1.29
  -5 -10  -2   14.06    1.03
  -6 -10  -2   68.82    3.02
  -6 -10  -2   66.63    2.83
   6 -10   2   66.34    2.78
  -6 -10  -2   69.05    2.83
  -6 -10  -2   71.65    3.01
  -7 -10  -2   20.84    1.41
  -7 -10  -2   21.87    1.44
  -7 -10  -2   20.08    1.29
   7 -10   2   18.48    1.19
  -7 -10  -2   21.33    1.32
  -8 -10  -2   12.94    1.01
  -8 -10  -2   13.79    1.05
  -8 -10  -2   14.31    1.06
  -8 -10  -2   12.57    0.99
  -9 -10  -2   10.97    0.83
  -9 -10  -2    9.48    0.76
  -9  10  -2   10.84    0.80
  -9  11   2    3.06    0.44
  -9 -11   2    2.66    0.47
   9  11  -2    2.38    0.47
  -8 -11   2    2.91    0.62
  -8 -11   2    2.13    0.58
  -7 -11   2   68.69    2.81
  -7 -11   2   62.71    2.73
  -7 -11   2   62.90    2.77
  -7 -11   2   64.83    2.88
   7 -11  -2   67.83    2.87
  -6 -11   2   15.75    1.21
  -6 -11   2   15.89    1.22
  -6 -11   2   16.25    1.26
  -6 -11   2   15.74    1.36
   6 -11  -2   15.73    1.28
  -6 -11   2   15.48    0.97
  -5 -11   2  205.38    7.04
  -5 -11   2  209.17    7.18
  -5 -11   2  203.54    7.26
  -5 -11   2  206.41    7.10
   5 -11  -2  204.99    7.14
   4 -11  -2  434.93   13.88
  -4 -11   2  436.35   14.00
  -4 -11   2  455.80   14.22
  -4 -11   2  432.15   14.24
  -4 -11   2  435.67   14.10
  -4 -11   2  442.98   13.92
   3 -11  -2   23.77    1.26
  -3 -11   2   25.15    1.34
  -3 -11   2   23.50    1.44
   3 -11  -2   25.30    1.44
  -3 -11   2   25.65    1.56
   2 -11  -2   32.99    1.50
  -2 -11   2   34.68    1.70
  -2 -11   2   33.78    1.77
   2 -11  -2   33.74    1.66
  -2 -11   2   33.09    1.63
  -2 -11   2   33.72    1.80
  -1 -11   2    2.50    0.58
   1 -11  -2    2.73    0.44
   1 -11  -2    2.19    0.42
   1 -11  -2    2.70    0.45
  -1 -11   2    3.14    0.62
   1 -11  -2    2.78    0.51
  -1 -11   2    3.35    0.61
   0 -11  -2    9.94    0.72
   0 -11  -2    9.92    0.81
   0 -11   2   11.22    0.98
   0 -11  -2   11.18    0.82
   0 -11   2   11.28    0.88
   0 -11   2    9.23    0.83
   0 -11  -2   10.51    0.77
  -1 -11  -2  121.37    4.32
   1 -11   2  119.97    4.40
  -1 -11  -2  114.64    4.29
  -1 -11  -2  119.97    4.15
   1 -11   2  121.93    4.26
  -2 -11  -2   59.52    2.59
   2 -11   2   59.20    2.58
  -2 -11  -2   61.05    2.62
  -2 -11  -2   63.35    2.44
   2 -11   2   63.60    2.53
  -3 -11  -2    8.59    0.69
  -3 -11  -2    8.94    0.98
   3 -11   2    9.73    0.92
  -3 -11  -2   10.07    0.83
  -4 -11  -2    0.47    0.41
  -4 -11  -2    1.05    0.69
   4 -11   2    0.86    0.65
  -4 -11  -2    0.57    0.48
   5 -11   2   23.20    1.48
  -5 -11  -2   20.51    1.51
  -5 -11  -2   20.79    1.25
  -5 -11  -2   22.40    1.54
  -5 -11  -2   21.79    1.34
   5 -11   2   21.19    1.34
  -6 -11  -2   27.92    1.54
  -6 -11  -2   32.12    1.82
  -6 -11  -2   28.62    1.59
  -6 -11  -2   30.96    1.79
   6 -11   2   28.39    1.56
  -7 -11  -2   71.29    2.83
  -7 -11  -2   71.42    2.99
  -7 -11  -2   67.01    2.83
  -7 -11  -2   73.19    2.99
   7 -11   2   67.15    2.73
  -8 -11  -2    6.65    0.71
  -8 -11  -2    7.30    0.78
  -8 -11  -2    6.07    0.69
  -8 -11  -2    7.16    0.75
  -9 -11  -2    0.13    0.35
  -9  11  -2    0.37    0.33
  -9 -11  -2    0.13    0.30
  -8 -12   2    1.95    0.51
  -7 -12   2    8.63    0.85
  -7 -12   2    7.48    0.82
  -7 -12   2    9.34    0.99
  -7 -12   2    8.65    0.93
   7 -12  -2    7.58    0.91
  -6 -12   2  230.61    7.67
  -6 -12   2  224.30    7.77
  -6 -12   2  228.18    7.78
  -6 -12   2  225.85    7.89
   6 -12  -2  225.71    7.79
  -5 -12   2   11.43    0.98
  -5 -12   2   12.85    1.18
  -5 -12   2   12.30    1.26
  -5 -12   2   11.53    1.11
   5 -12  -2   12.03    1.17
  -5 -12   2   10.19    0.83
   4 -12  -2   12.67    0.93
  -4 -12   2   10.82    0.93
  -4 -12   2   10.76    1.07
  -4 -12   2   10.66    1.22
  -4 -12   2   12.38    0.93
  -4 -12   2   11.40    1.16
   3 -12  -2    3.85    0.58
  -3 -12   2    3.69    0.77
  -3 -12   2    3.37    0.84
  -3 -12   2    3.51    0.61
   3 -12  -2    3.79    0.76
  -3 -12   2    3.63    0.85
   2 -12  -2    5.91    0.62
  -2 -12   2    4.59    0.76
  -2 -12   2    4.64    0.81
   2 -12  -2    5.48    0.74
  -2 -12   2    5.89    0.74
   1 -12  -2   82.20    2.94
   1 -12  -2   68.87    2.88
  -1 -12   2   78.45    3.25
  -1 -12   2   81.18    3.21
   1 -12  -2   73.51    2.89
  -1 -12   2   83.10    3.14
   1 -12  -2   85.26    3.08
  -1 -12   2   79.96    3.07
   0 -12  -2   25.40    1.28
   0 -12   2   24.95    1.41
   0 -12  -2   25.71    1.37
   0 -12   2   24.33    1.52
   0 -12  -2   23.79    1.33
   0 -12   2   25.16    1.41
   0 -12  -2   25.45    1.32
   1 -12   2  101.52    3.84
  -1 -12  -2  104.97    3.91
  -1 -12  -2  105.73    3.73
  -1 -12  -2  101.73    3.68
   1 -12   2   99.59    3.95
  -1 -12  -2  107.49    3.93
  -2 -12  -2    0.65    0.57
   2 -12   2    0.99    0.54
  -2 -12  -2   -0.08    0.58
   2 -12   2    0.60    0.54
  -2 -12  -2    0.34    0.42
  -3 -12  -2   25.66    1.59
  -3 -12  -2   26.13    1.61
  -3  12  -2   23.39    1.33
   3 -12   2   24.43    1.46
  -3 -12  -2   25.85    1.39
  -4 -12  -2    4.38    0.57
   4 -12   2    4.79    0.83
  -4 -12  -2    4.46    0.68
  -5 -12  -2   63.44    2.66
  -5 -12  -2   68.11    3.03
  -5 -12  -2   71.52    3.06
  -5 -12  -2   64.92    2.78
   5 -12   2   71.44    2.87
  -6 -12  -2   -0.13    0.50
  -6 -12  -2    0.22    0.43
  -6 -12  -2    0.43    0.65
  -6 -12  -2    0.51    0.66
   6 -12   2    1.28    0.54
  -7 -12  -2    0.33    0.46
  -7 -12  -2    0.78    0.58
  -7 -12  -2    0.38    0.59
   7 -12   2    0.36    0.41
  -7 -12  -2    0.32    0.43
  -8 -12  -2   20.18    1.10
  -8 -12  -2   20.40    1.19
  -8 -12  -2   18.79    1.08
  -8 -12  -2   20.98    1.18
  -8 -13   2   18.84    1.03
   8  13  -2   17.71    0.97
  -7 -13   2   11.76    0.96
   7  13  -2   12.43    0.90
  -7 -13   2   12.34    0.98
   7 -13  -2   13.11    1.02
  -6 -13   2    3.35    0.73
  -6 -13   2    3.61    0.86
   6 -13  -2    3.10    0.75
  -6 -13   2    4.09    0.74
  -5 -13   2   38.99    2.11
  -5 -13   2   39.61    1.98
   5 -13  -2   38.24    1.99
  -5 -13   2   31.86    1.60
  -5 -13   2   37.26    2.03
  -4 -13   2    5.34    0.86
  -4 -13   2    3.83    0.61
  -4 -13   2    6.17    1.00
   3 -13  -2    9.90    0.83
  -3 -13   2    8.37    1.02
  -3 -13   2    9.56    1.12
   3 -13  -2    9.74    1.00
  -3 -13   2   12.23    0.94
  -3 -13   2    9.99    1.20
   2 -13  -2   20.35    1.15
  -2 -13   2   19.38    1.43
  -2 -13   2   20.41    1.38
   2 -13  -2   19.28    1.27
  -2 -13   2   21.13    1.28
   1 -13  -2   10.77    0.81
  -1 -13   2   11.72    1.03
  -1 -13   2   11.65    1.03
   1 -13  -2    9.88    0.90
  -1 -13   2    9.24    0.94
  -1 -13   2   10.53    1.11
   1 -13  -2    9.85    0.79
   0 -13   2   30.43    1.63
   0 -13  -2   28.58    1.43
   0 -13   2   30.27    1.75
   0 -13  -2   26.76    1.49
   0 -13  -2   28.38    1.51
   0 -13  -2   29.42    1.49
   1 -13   2   45.03    2.11
  -1 -13  -2   49.29    2.17
   1 -13   2   44.93    2.22
  -1 -13  -2   45.48    2.12
  -1 -13  -2   44.54    1.95
  -1 -13  -2   42.68    1.91
  -2 -13  -2  163.79    5.98
  -2 -13  -2  173.69    6.04
  -2 -13  -2  170.26    5.80
   2 -13   2  169.95    5.92
  -3 -13  -2   23.97    1.37
  -3 -13  -2   24.32    1.58
  -3 -13  -2   26.00    1.61
  -4 -13  -2  112.96    3.68
   4 -13   2  105.62    3.75
  -5 -13  -2    1.34    0.52
  -5 -13  -2    0.58    0.40
  -5 -13  -2    0.92    0.73
  -5 -13  -2    0.70    0.73
   5 -13   2   -0.14    0.56
  -6 -13  -2    3.05    0.59
  -6 -13  -2    2.93    0.53
  -6 -13  -2    4.15    0.81
  -6 -13  -2    2.31    0.72
   6 -13   2    2.63    0.57
  -7 -13  -2    2.71    0.50
  -7 -13  -2    2.29    0.45
  -7 -13  -2    2.87    0.64
   7 -13   2    2.00    0.47
  -7 -13  -2    2.46    0.63
  -8 -13  -2    0.92    0.38
  -8  13  -2    1.00    0.36
  -8 -13  -2    0.74    0.38
  -8 -13  -2    0.43    0.28
  -7 -14   2    5.20    0.62
  -7 -14   2    5.51    0.64
   7  14  -2    3.79    0.49
  -6 -14   2   27.26    1.52
   6 -14  -2   28.79    1.54
  -6 -14   2   27.41    1.49
  -5 -14   2   17.65    1.32
  -5 -14   2   15.19    1.29
  -5 -14   2   14.67    1.19
   5  14  -2   13.08    0.94
  -4 -14   2    0.70    0.82
  -4 -14   2   -0.11    0.69
  -3 -14   2   22.04    1.62
   3 -14  -2   21.34    1.21
   3 -14  -2   21.12    1.41
  -3 -14   2   20.47    1.44
  -3 -14   2   22.35    1.57
   2 -14  -2    3.58    0.56
  -2 -14   2    3.05    0.79
  -2 -14   2    3.73    0.82
   2 -14  -2    5.59    0.76
  -1 -14   2  139.47    5.02
  -1 -14   2  126.67    4.73
   1 -14  -2  127.48    4.49
  -1 -14   2  118.47    4.72
   1 -14  -2  131.51    4.65
   0 -14  -2    8.59    0.85
   0 -14  -2    9.68    0.79
   0 -14   2    8.85    0.99
   0 -14  -2    8.59    0.81
   0 -14  -2    9.83    0.83
   1 -14   2  136.89    5.24
  -1 -14  -2  140.52    5.10
  -1 -14  -2  138.50    4.90
   1 -14   2  148.55    5.15
  -1 -14  -2  141.34    5.10
  -1 -14  -2  142.42    4.89
  -2 -14  -2   65.85    2.83
  -2 -14  -2   61.44    2.57
  -2 -14  -2   66.24    2.83
  -3 -14  -2  277.30    9.54
  -3 -14  -2  285.13    9.30
  -3 -14  -2  292.68    9.59
  -4 -14  -2    1.85    0.77
  -4 -14  -2    2.31    0.54
   4 -14   2    2.37    0.68
  -4 -14  -2    1.21    0.73
  -5 -14  -2    3.51    0.60
   5 -14   2    4.50    0.71
  -6 -14  -2   14.60    1.12
  -6 -14  -2   12.11    0.90
  -6 -14  -2   13.37    1.07
   6 -14   2   13.82    0.96
  -7 -14  -2   12.65    0.94
  -7 -14  -2    8.92    0.69
  -7 -14  -2   12.60    0.90
   7 -14   2    8.93    0.69
  -7 -15   2   38.20    1.58
  -6 -15   2    0.16    0.46
  -6 -15   2    1.07    0.47
   6 -15  -2    0.70    0.50
  -5 -15   2    3.44    0.73
  -5 -15   2    3.34    0.66
  -4 -15   2    1.20    0.76
  -4 -15   2    1.08    0.62
   4 -15  -2    0.37    0.59
  -4 -15   2    0.44    0.66
   3 -15  -2   15.53    0.97
   3 -15  -2   14.48    1.13
  -3 -15   2   13.16    1.23
  -3 -15   2   12.66    1.12
   2 -15  -2    1.83    0.47
  -2 -15   2    1.16    0.70
  -2 -15   2    3.03    0.73
   2 -15  -2    1.78    0.59
  -1 -15   2   17.84    1.41
  -1 -15   2   18.49    1.30
   1 -15  -2   17.52    1.06
   1 -15  -2   17.30    1.17
   0 -15   2    1.95    0.74
   0 -15  -2    1.70    0.50
   0 -15  -2    2.98    0.52
   0 -15  -2    1.27    0.46
   0 -15  -2    2.31    0.51
  -1 -15  -2   13.94    1.04
   1 -15   2   11.66    1.07
  -1 -15  -2   11.71    0.87
  -1 -15  -2   11.33    0.97
  -1 -15  -2   11.27    0.83
  -2 -15  -2  176.35    6.22
  -2 -15  -2  182.96    6.27
  -2 -15  -2  175.22    6.00
  -3 -15  -2    0.45    0.61
  -3 -15  -2    1.11    0.46
  -3 -15  -2    0.73    0.63
   3 -15   2    0.97    0.65
  -4 -15  -2   13.84    1.17
  -4 -15  -2   15.21    0.98
  -4 -15  -2   13.30    1.16
   4 -15   2   15.53    1.11
  -5 -15  -2   35.80    1.63
   5 -15   2   36.45    1.74
  -6 -15  -2    3.94    0.63
  -6 -15  -2    3.26    0.44
  -6 -15  -2    4.13    0.68
   6 -15   2    2.74    0.49
  -6 -16   2    4.31    0.58
  -6 -16   2    4.87    0.53
   6 -16  -2    6.09    0.61
  -5 -16   2    7.43    0.72
  -5 -16   2    8.42    0.86
  -4 -16   2    1.99    0.68
  -4 -16   2    1.33    0.53
   4 -16  -2    1.79    0.58
  -3 -16   2   10.86    0.97
   3 -16  -2    9.76    0.91
  -2 -16   2   17.83    1.25
   2 -16  -2   17.89    1.04
   2 -16  -2   20.72    1.24
  -1 -16   2   25.50    1.66
   1 -16  -2   25.05    1.27
   1 -16  -2   25.99    1.41
   0 -16   2    4.42    0.81
   0 -16  -2    3.56    0.50
   0 -16  -2    3.93    0.56
  -1 -16  -2   -0.03    0.43
  -1 -16  -2    0.27    0.45
  -1 -16  -2    0.72    0.40
  -2 -16  -2    2.20    0.60
  -2 -16  -2    1.96    0.60
  -2 -16  -2    2.17    0.47
  -3 -16  -2   16.06    1.15
  -3 -16  -2   13.34    0.90
  -3 -16  -2   15.78    1.14
   3 -16   2   15.68    1.12
  -4 -16  -2    9.77    0.91
  -4 -16  -2    9.07    0.70
   4 -16   2    9.28    0.85
  -4 -16  -2    9.91    0.93
  -5 -16  -2    8.65    0.64
  -5 -16  -2    9.86    0.90
   5 -16   2   11.37    0.81
  -6 -16  -2   69.88    2.58
  -6 -16  -2   65.48    2.53
   6 -16   2   64.01    2.40
  -5 -17   2    3.10    0.54
  -5 -17   2    3.48    0.46
   5 -17  -2    3.02    0.48
  -4 -17   2    1.51    0.53
  -4 -17   2    0.56    0.45
   4 -17  -2    1.08    0.44
   3 -17  -2    2.39    0.52
  -2 -17   2   23.05    1.47
   2 -17  -2   23.13    1.27
  -1 -17   2   23.10    1.45
   1 -17  -2   22.23    1.21
   0 -17  -2    0.92    0.33
  -1 -17  -2    0.69    0.40
  -1 -17  -2    1.46    0.35
  -1  17  -2    1.76    0.48
  -2 -17  -2   23.54    1.32
  -2 -17  -2   24.80    1.36
  -2 -17  -2   25.48    1.17
  -3 -17  -2    1.06    0.48
   3 -17   2    0.76    0.51
  -3 -17  -2    1.30    0.51
   3 -17   2    1.50    0.50
  -4 -17  -2    0.17    0.44
  -4 -17  -2    0.53    0.43
   4 -17   2    0.73    0.43
  -5 -17  -2   15.25    0.93
   5 -17   2   14.57    0.84
  -5 -17  -2   14.28    0.91
   3 -18  -2    0.56    0.33
  -3 -18   2    0.29    0.44
   2 -18  -2   58.93    2.16
  -2 -18   2   62.81    2.39
  -1 -18   2   21.60    1.11
   1 -18  -2   19.83    1.02
   0 -18   2    4.23    0.55
   1 -18   2   33.47    1.62
   1 -18   2   39.48    1.69
   2 -18   2    4.31    0.56
  -2 -18  -2    2.02    0.40
   3 -18   2    0.95    0.39
   3 -18   2    0.92    0.39
  -3 -18  -2    0.59    0.35
  -1 -19   2    0.49    0.32
   0 -19   2    0.27    0.33
   0 -19   2    0.07    0.27
   1 -19   2    9.10    0.64
   1 -19   2    7.45    0.59
  11   0  -3   -0.12    0.33
  10   0  -3    0.21    0.52
 -10   0   3    0.30    0.34
   9   0  -3    0.69    0.41
  -9   0   3    0.69    0.46
   9   0  -3    0.08    0.66
  -8   0   3   -0.03    0.43
  -8   0   3   -0.09    0.50
  -8   0   3    0.22    0.45
   8   0  -3    0.33    0.65
  -7   0   3    0.24    0.41
  -7   0   3   -0.09    0.52
  -7   0   3    0.61    0.40
   7   0  -3   -0.11    0.56
  -6   0   3    0.10    0.38
  -6   0   3   -0.03    0.46
  -6   0   3    0.02    0.31
   6   0  -3    0.03    0.45
   5   0  -3    0.22    0.39
  -5   0   3    0.10    0.31
  -5   0   3   -0.09    0.40
  -5   0   3    0.25    0.28
  -5   0   3   -0.36    0.62
   5   0  -3    0.65    0.43
   4   0  -3    0.20    0.33
  -4   0   3   -0.07    0.49
  -4   0   3   -0.07    0.61
   4   0  -3   -0.06    0.53
  -4   0   3    0.22    0.29
  -3   0   3   -0.03    0.30
   3   0  -3   -0.02    0.26
   3   0  -3   -0.06    0.45
  -3   0   3   -0.05    0.49
  -3   0   3   -0.33    0.64
   3   0  -3    0.06    0.49
  -2   0   3   -0.22    0.55
   2   0  -3    0.09    0.42
  -2   0   3   -0.11    0.70
   2   0  -3    0.26    0.59
  -1   0   3    0.05    0.59
  -1   0   3   -0.04    0.45
   0   0   3    0.12    0.49
   0   0   3   -0.10    0.62
   0   0  -3    0.67    0.60
   0   0   3    0.04    0.43
  -1   0  -3    0.64    0.52
   1   0   3    0.12    0.48
  -1   0  -3    0.04    0.51
  -2   0  -3    1.10    0.60
   2   0   3    0.54    0.50
   2   0   3    0.16    0.59
  -2   0  -3    0.79    0.55
  -3   0  -3    0.04    0.26
  -3   0  -3    0.21    0.32
  -3   0  -3    0.08    0.30
  -3   0  -3   -0.06    0.52
   3   0   3    0.11    0.51
   3   0   3    0.06    0.43
  -3   0  -3    0.30    0.48
  -4   0  -3    0.39    0.26
  -4   0  -3    0.12    0.30
  -4   0  -3   -0.02    0.36
  -4   0  -3    0.64    0.40
   4   0   3    0.46    0.55
  -4   0  -3    0.17    0.44
  -5   0  -3    0.03    0.42
  -5   0  -3    0.46    0.34
  -5   0  -3    0.10    0.49
   5   0   3    0.29    0.61
   5   0   3    0.29    0.39
  -5   0  -3    0.06    0.32
  -5   0  -3    0.15    0.39
  -6   0  -3    0.13    0.38
  -6   0  -3    0.41    0.42
  -6   0  -3    0.10    0.40
   6   0   3    0.49    0.49
  -7   0  -3    0.26    0.43
  -7   0  -3    0.22    0.43
  -7   0  -3   -0.13    0.50
   7   0   3    0.23    0.59
  -8   0  -3   -0.15    0.60
   8   0   3    0.64    0.68
  -8   0  -3    0.13    0.48
  -9   0  -3    0.50    0.59
   9   0   3    0.08    0.65
  -9   0  -3    0.33    0.44
 -10   0  -3    0.68    0.49
  10   0   3    0.20    0.51
 -10   0  -3    0.02    0.32
  11   0   3    0.35    0.36
 -11   0  -3    0.33    0.31
  11   1  -3    8.14    0.70
  10  -1  -3    2.08    0.63
  10   1  -3    2.23    0.62
 -10   1   3    1.82    0.42
 -10  -1   3    1.46    0.41
   9  -1  -3  172.82    5.97
   9   1  -3  175.93    5.97
  -9   1   3  152.77    5.59
  -9  -1   3  159.65    5.65
  -9   1   3  178.53    5.67
  -9  -1   3  161.83    5.59
  -8  -1   3    6.49    0.75
   8  -1  -3    5.34    0.91
   8   1  -3    5.79    0.89
  -8  -1   3    6.33    0.72
  -8   1   3    4.91    0.66
  -8  -1   3    7.80    0.76
  -8   1   3    5.82    0.73
  -7  -1   3    6.73    0.73
  -7   1   3    7.95    0.70
   7  -1  -3    7.42    0.89
   7   1  -3    7.26    0.88
  -7   1   3    7.12    0.70
  -7  -1   3    7.57    0.74
  -7   1   3    8.07    0.80
  -7  -1   3    7.43    0.75
  -6  -1   3   77.98    2.89
  -6   1   3   77.93    2.82
   6  -1  -3   76.70    2.99
   6   1  -3   73.42    2.97
  -6   1   3   70.85    2.76
  -6  -1   3   74.58    2.81
  -6   1   3   77.49    2.90
  -6  -1   3   77.57    2.87
  -5   1   3   -0.16    0.43
  -5  -1   3    0.39    0.40
  -5  -1   3    0.27    0.34
  -5   1   3    0.30    0.30
   5   1  -3    0.35    0.39
  -5  -1   3    0.24    0.29
  -5   1   3    0.48    0.28
  -5   1   3    0.09    0.49
   5   1  -3    0.32    0.50
   5  -1  -3    0.46    0.37
   4  -1  -3  416.92   13.44
   4   1  -3  434.13   13.99
  -4   1   3  418.83   13.85
   4   1  -3  405.61   12.69
  -4  -1   3  401.77   12.64
  -4   1   3  410.12   12.59
  -4  -1   3  401.77   12.55
  -4  -1   3  407.56   14.16
  -4   1   3  387.02   13.66
   3   1  -3   14.64    0.79
  -3  -1   3   14.24    0.78
  -3  -1   3   15.28    0.78
  -3  -1   3   16.43    1.58
  -3   1   3   14.22    1.33
  -3   1   3   16.18    1.30
   3   1  -3   16.95    1.45
   3  -1  -3   17.66    1.29
   3   1  -3   15.87    1.29
  -2  -1   3  149.94    6.20
  -2   1   3  158.33    6.00
   2   1  -3  162.62    5.87
  -2   1   3  165.03    5.85
   2   1  -3  161.78    6.11
   2  -1  -3  168.55    5.92
  -1  -1   3   24.34    1.72
  -1   1   3   24.80    1.63
   1  -1  -3   24.71    1.55
   0  -1   3  916.48   29.13
   0   1   3  945.71   28.81
   0   1   3  916.90   28.87
   0   1  -3  959.49   29.05
   0  -1  -3  941.72   28.96
   0   1   3  895.69   29.01
   1   1   3   47.07    2.22
  -1   1  -3   45.14    2.26
  -1  -1  -3   46.37    2.28
   1   1   3   45.85    2.32
  -1   1  -3   44.18    2.20
  -2   1  -3  208.95    7.27
   2   1   3  210.68    7.27
   2  -1   3  205.71    7.28
   2   1   3  199.64    7.31
  -2   1  -3  203.04    7.15
  -2  -1  -3  198.17    7.23
  -3   1  -3  528.53   16.98
   3  -1   3  533.74   16.85
   3   1   3  524.02   16.96
   3   1   3  536.08   16.98
  -3   1  -3  508.60   16.67
  -3  -1  -3  536.49   16.89
  -3   1  -3  513.95   15.99
  -3   1  -3  540.36   15.98
  -3  -1  -3  497.35   15.97
  -3  -1  -3  513.93   15.88
  -3   1  -3  507.85   15.86
   4  -1   3   15.47    1.37
   4   1   3   17.32    1.50
  -4   1  -3   15.95    1.26
  -4   1  -3   15.49    0.91
  -4  -1  -3   16.19    0.94
  -4  -1  -3   16.60    0.82
  -4   1  -3   16.81    0.85
  -4  -1  -3   16.55    0.86
  -4   1  -3   15.36    0.95
  -5   1  -3  641.54   19.39
  -5  -1  -3  628.13   19.19
  -5   1  -3  611.48   19.14
  -5   1  -3  620.92   19.26
  -5  -1  -3  628.13   19.31
  -5   1  -3  596.96   20.83
   5  -1   3  592.78   20.11
   5   1   3  616.34   20.51
  -5  -1  -3  635.06   19.17
   5  -1   3  598.42   20.53
   5   1   3  597.48   21.14
  -6   1  -3  117.67    4.01
  -6  -1  -3  115.19    4.04
  -6  -1  -3  114.32    4.05
  -6   1  -3  114.97    4.06
  -6   1  -3  114.83    4.09
  -6  -1  -3  108.80    4.10
   6   1   3  113.60    4.17
  -7   1  -3   25.21    1.33
  -7  -1  -3   25.93    1.39
   7   1   3   26.92    1.56
   7  -1   3   25.50    1.55
  -7  -1  -3   26.18    1.45
  -7   1  -3   27.94    1.48
  -7  -1  -3   26.40    1.45
  -7   1  -3   24.21    1.37
   8  -1   3  428.38   13.54
   8   1   3  436.81   13.55
  -8   1  -3  430.07   13.40
  -8  -1  -3  422.68   13.39
  -8  -1  -3  388.22   13.24
  -8   1  -3  407.95   13.22
  -8  -1  -3  420.15   13.31
  -9  -1  -3    5.36    0.69
  -9   1  -3    4.68    0.59
   9   1   3    5.42    0.85
   9  -1   3    5.64    0.85
  -9  -1  -3    5.01    0.75
  -9   1  -3    4.58    0.76
 -10  -1  -3   11.73    0.83
 -10   1  -3   12.97    0.96
 -10  -1  -3   12.76    0.96
  10   1   3   13.37    1.01
 -11  -1  -3    0.02    0.30
 -11   1  -3   -0.10    0.31
  11   1   3   -0.47    0.36
  11  -2  -3    1.67    0.40
  11   2  -3    1.84    0.39
  10   2  -3    0.90    0.52
  10   2  -3   -0.27    0.34
 -10  -2   3    0.14    0.34
 -10   2   3    0.58    0.30
  -9   2   3   48.81    2.10
   9   2  -3   50.75    2.36
  -9  -2   3   53.80    2.21
  -9  -2   3   48.62    2.15
  -9  -2   3   52.01    2.08
  -8  -2   3    2.23    0.60
   8   2  -3    2.21    0.72
  -8   2   3    2.58    0.53
  -8  -2   3    3.24    0.60
  -8   2   3    2.38    0.63
  -7  -2   3   32.92    1.65
   7   2  -3   33.16    1.75
  -7   2   3   27.52    1.45
  -7  -2   3   31.50    1.56
  -7  -2   3   31.97    1.54
  -7   2   3   32.24    1.62
  -6  -2   3    0.83    0.45
   6   2  -3    0.78    0.47
  -6   2   3    0.57    0.34
  -6  -2   3    0.87    0.40
  -6  -2   3    0.69    0.46
  -6   2   3    0.20    0.49
   5   2  -3  595.07   20.21
  -5  -2   3  587.21   20.14
  -5   2   3  584.99   20.12
  -5  -2   3  601.32   18.60
   5   2  -3  636.78   18.72
  -5  -2   3  611.23   18.64
  -5   2   3  603.37   18.48
  -5  -2   3  585.46   18.53
  -5  -2   3  546.06   20.42
   4   2  -3   51.91    3.05
  -4  -2   3   58.43    2.98
  -4   2   3   49.94    2.80
   4  -2  -3   50.71    2.41
  -4  -2   3   53.42    2.00
   4  -2  -3   51.96    2.02
   4   2  -3   51.93    2.02
  -4  -2   3   53.14    2.01
  -4  -2   3   50.70    1.91
  -4   2   3   49.98    2.61
  -4  -2   3   54.81    3.28
   3  -2  -3  130.43    4.28
   3   2  -3  129.71    4.28
  -3  -2   3  124.34    4.26
  -3   2   3  134.98    5.13
  -3  -2   3  128.43    5.56
   3  -2  -3  125.51    4.32
  -3  -2   3  134.58    5.12
  -3   2   3  133.03    5.11
   3   2  -3  135.47    5.45
   3  -2  -3  138.42    4.91
   3  -2  -3  131.30    5.11
   3   2  -3  128.55    5.11
  -2   2   3    5.78    0.76
   2  -2  -3    4.67    0.71
   2   2  -3    6.60    0.79
  -2  -2   3    4.75    1.03
  -2   2   3    5.99    0.86
   2   2  -3    5.93    1.00
   2  -2  -3    6.54    0.80
  -1   2   3    0.13    0.40
  -1  -2   3   -0.13    0.42
  -1  -2   3   -0.12    0.66
  -1   2   3    1.64    0.51
   1   2  -3    0.28    0.65
  -1   2   3    0.05    0.49
   1  -2  -3    0.31    0.50
   0  -2   3   46.49    2.52
   0   2   3   49.81    2.30
   0  -2   3   48.60    2.30
   0   2  -3   54.78    2.58
   0   2   3   50.98    2.47
   0   2   3   51.10    2.26
   1  -2   3  136.43    5.24
   1   2   3  135.47    4.99
   1  -2   3  132.00    4.97
  -1   2  -3  137.50    5.12
   1   2   3  133.54    5.17
  -1  -2  -3  136.11    5.12
  -1   2  -3  136.67    5.02
   2  -2   3   71.59    3.25
  -2   2  -3   76.09    3.23
   2   2   3   71.25    3.18
   2  -2   3   72.04    3.18
  -2   2  -3   72.52    3.13
  -2  -2  -3   72.11    3.25
  -3  -2  -3   57.16    2.12
  -3   2  -3   54.54    2.12
  -3   2  -3   55.06    1.99
  -3  -2  -3   55.14    2.02
  -3  -2  -3   54.89    2.09
  -3  -2  -3   55.54    2.11
  -3   2  -3   57.04    2.10
  -3  -2  -3   61.05    2.93
  -3   2  -3   58.37    2.87
   3   2   3   59.57    2.99
   3   2   3   58.21    2.86
   3  -2   3   57.01    2.85
  -3   2  -3   56.55    2.64
   3  -2   3   58.21    2.77
  -3  -2  -3   55.80    2.83
  -4   2  -3    0.67    0.39
  -4  -2  -3    0.40    0.40
  -4   2  -3    1.23    0.39
  -4  -2  -3    0.48    0.39
  -4   2  -3    2.04    0.34
  -4  -2  -3    0.71    0.32
  -4  -2  -3    0.54    0.29
  -4   2  -3    0.78    0.56
  -4  -2  -3    1.41    0.63
   4   2   3    0.77    0.77
   4  -2   3    0.64    0.51
   4   2   3    1.62    0.63
  -4   2  -3    0.46    0.42
  -5  -2  -3   31.43    1.49
  -5   2  -3   30.25    1.41
  -5   2  -3   30.53    1.50
  -5  -2  -3   27.49    1.35
  -5   2  -3   30.33    1.32
  -5  -2  -3   30.27    1.51
   5   2   3   28.46    2.18
  -5  -2  -3   30.61    1.35
   5   2   3   26.51    2.51
   5  -2   3   26.58    1.93
   5  -2   3   26.19    1.75
   6   2   3   27.69    1.48
  -6  -2  -3   24.66    1.30
  -6  -2  -3   27.68    1.38
  -6   2  -3   26.56    1.37
  -6  -2  -3   27.26    1.47
  -6  -2  -3   28.06    1.39
  -6   2  -3   27.88    1.31
   7   2   3   81.62    3.23
  -7   2  -3   77.60    2.95
  -7  -2  -3   77.89    3.06
  -7  -2  -3   81.46    3.12
  -7   2  -3   78.88    3.09
  -7  -2  -3   76.77    3.12
   8   2   3  617.07   18.42
  -8  -2  -3  588.67   18.25
  -8   2  -3  588.77   18.27
  -8  -2  -3  545.17   18.17
  -8   2  -3  563.67   18.04
  -8  -2  -3  587.27   18.22
  -9   2  -3   55.28    2.42
  -9  -2  -3   52.89    2.37
   9   2   3   53.41    2.45
  -9  -2  -3   53.71    2.33
 -10   2  -3   11.10    0.90
 -10  -2  -3    9.41    0.84
  10   2   3   10.63    0.90
 -10  -2  -3   10.41    0.79
 -11   2  -3   21.29    1.05
 -11  -2  -3   21.03    1.04
  10   3  -3   28.60    1.38
  10  -3  -3   31.56    1.56
  10   3  -3   32.35    1.57
  -9  -3   3    0.75    0.37
  -9   3   3    0.88    0.50
   9  -3  -3    0.48    0.61
   9   3  -3    0.51    0.60
  -9  -3   3    0.27    0.51
  -9   3   3    0.74    0.40
  -9  -3   3    0.94    0.51
  -8  -3   3   38.63    1.88
   8  -3  -3   35.51    1.94
   8   3  -3   37.75    1.95
  -8   3   3   32.00    1.64
  -8  -3   3   37.21    1.80
  -8  -3   3   37.29    1.73
  -8   3   3   36.14    1.81
  -7  -3   3   11.28    0.96
   7  -3  -3    9.08    0.96
   7   3  -3   10.53    0.99
  -7   3   3   10.70    0.80
  -7  -3   3   10.84    0.90
  -7   3   3   12.34    1.00
  -6  -3   3   39.09    1.82
  -6   3   3   41.09    1.68
  -6  -3   3   40.46    1.76
   6  -3  -3   37.74    1.84
   6   3  -3   39.57    1.87
  -5  -3   3   34.35    1.53
   5  -3  -3   36.61    1.61
   5   3  -3   35.92    1.61
  -5  -3   3   33.60    1.57
  -5  -3   3   35.15    1.51
  -5   3   3   33.35    1.40
  -5  -3   3   31.76    2.78
   4  -3  -3  144.91    5.08
  -4  -3   3  142.54    5.75
  -4   3   3  137.93    5.73
  -4  -3   3  137.58    4.66
   4   3  -3  149.40    4.74
   4  -3  -3  146.30    4.73
  -4  -3   3  137.90    4.70
  -4  -3   3  139.32    4.63
  -4  -3   3  139.36    4.75
   4  -3  -3  141.28    4.77
  -4   3   3  124.47    5.17
   4   3  -3  141.90    6.19
  -4  -3   3  149.50    6.52
   3  -3  -3   24.96    1.10
   3   3  -3   23.62    1.09
  -3  -3   3   24.94    1.66
  -3   3   3   24.40    1.66
   3  -3  -3   25.11    1.49
   3  -3  -3   23.93    1.65
   3   3  -3   25.15    1.69
  -3  -3   3   24.43    1.16
  -3  -3   3   23.93    1.11
   3   3  -3   26.31    2.01
  -3  -3   3   24.83    2.12
  -3   3   3   25.50    1.63
  -2  -3   3    2.32    0.59
  -2   3   3    2.79    0.61
   2  -3  -3    3.84    0.64
  -2  -3   3    4.91    1.02
   2   3  -3    2.87    0.58
  -2   3   3    3.64    0.73
   2  -3  -3    3.63    0.65
  -2  -3   3    2.96    0.39
  -1  -3   3 1209.65   37.24
   1   3  -3 1166.64   37.06
  -1   3   3 1151.02   36.68
  -1  -3   3 1178.75   36.45
  -1   3   3 1190.95   36.45
   1  -3  -3 1202.13   36.62
  -1   3   3 1218.66   36.58
  -1  -3   3 1148.07   36.53
   0   3   3  139.52    5.13
   0  -3   3  138.65    5.11
   0   3   3  138.27    5.31
   0   3  -3  144.17    5.46
   0   3   3  139.50    5.03
   0  -3   3  142.21    5.04
   1  -3   3  469.85   15.52
   1   3   3  479.22   15.17
   1  -3   3  458.97   15.13
  -1   3  -3  467.96   15.37
   1   3   3  467.41   15.42
  -1  -3  -3  480.41   15.37
  -1  -3  -3  481.62   15.19
  -1   3  -3  466.14   15.17
   2  -3   3   13.96    1.26
  -2  -3  -3   14.07    1.18
  -2   3  -3   13.71    1.17
   2   3   3   13.07    1.14
  -2   3  -3   12.32    1.12
   2  -3   3   12.99    1.14
  -2  -3  -3   13.07    1.25
  -3  -3  -3  114.24    4.62
  -3   3  -3  112.57    4.59
   3   3   3  114.86    4.80
  -3   3  -3  116.41    4.31
   3   3   3  105.59    4.48
   3  -3   3  111.68    4.56
  -3  -3  -3  104.72    4.60
  -3   3  -3  108.75    3.70
  -3  -3  -3  108.09    3.70
  -3   3  -3  106.87    3.56
  -3  -3  -3  107.80    3.72
   3  -3   3  100.47    3.59
  -3   3  -3  112.76    3.70
  -3  -3  -3  107.06    3.72
   3  -3   3  115.35    4.51
  -4   3  -3    0.58    0.38
  -4  -3  -3    1.00    0.40
  -4  -3  -3    0.70    0.43
  -4   3  -3    1.18    0.39
  -4   3  -3    0.96    0.28
  -4  -3  -3    0.76    0.35
  -4  -3  -3    0.93    0.31
  -4  -3  -3    0.32    0.52
  -4   3  -3    0.47    0.55
   4   3   3    1.47    0.90
   4  -3   3    0.91    0.48
   4   3   3    0.59    0.57
  -4   3  -3    1.02    0.40
  -5  -3  -3   30.43    1.39
  -5   3  -3   28.96    1.28
  -5  -3  -3   28.66    1.33
  -5  -3  -3   29.17    1.49
  -5   3  -3   29.13    1.40
   6   3   3   31.89    1.60
   6  -3   3   29.20    1.55
  -6  -3  -3   33.02    1.54
  -6   3  -3   29.88    1.37
  -6  -3  -3   28.29    1.45
  -6  -3  -3   29.51    1.47
  -6  -3  -3   30.89    1.59
  -6   3  -3   28.26    1.44
  -7   3  -3    1.87    0.42
  -7  -3  -3    2.17    0.60
  -7  -3  -3    1.63    0.56
  -7  -3  -3    1.85    0.58
  -7   3  -3    1.17    0.56
   7  -3   3    2.05    0.65
   7   3   3    1.91    0.64
   8   3   3   66.42    2.75
   8  -3   3   60.55    2.71
  -8  -3  -3   61.71    2.63
  -8   3  -3   62.47    2.65
  -8  -3  -3   55.32    2.56
  -8  -3  -3   61.16    2.61
  -9   3  -3   26.63    1.58
  -9  -3  -3   31.16    1.61
   9   3   3   29.29    1.64
   9  -3   3   27.48    1.63
  -9  -3  -3   29.85    1.57
 -10  -3  -3    0.78    0.45
 -10   3  -3    0.66    0.49
  10  -3   3    0.86    0.49
  10   3   3    0.24    0.47
 -10  -3  -3    0.03    0.42
  10   4  -3   51.02    2.04
  10   4  -3   49.28    2.10
  10  -4  -3   52.83    2.15
  -9   4   3    2.62    0.58
   9  -4  -3    2.96    0.67
   9   4  -3    3.08    0.67
  -9  -4   3    2.00    0.60
  -9  -4   3    2.65    0.57
  -9  -4   3    1.94    0.41
  -8   4   3   32.74    1.71
   8  -4  -3   29.29    1.74
   8   4  -3   33.40    1.79
  -8  -4   3   34.67    1.80
  -8   4   3   31.06    1.54
  -8  -4   3   31.21    1.65
  -8  -4   3   33.48    1.59
  -7  -4   3   73.11    2.96
   7  -4  -3   74.50    2.99
   7   4  -3   72.37    2.97
  -7   4   3   69.17    2.72
  -7  -4   3   70.80    2.86
  -7  -4   3   71.41    2.81
  -7   4   3   71.66    2.91
   6  -4  -3    2.07    0.55
   6   4  -3    1.24    0.49
  -6   4   3    2.29    0.42
  -6  -4   3    1.79    0.49
  -6  -4   3    2.30    0.51
  -6  -4   3    1.72    0.54
   5  -4  -3    6.94    0.67
   5   4  -3    7.40    0.70
  -5  -4   3    7.58    0.71
  -5  -4   3    7.66    0.66
  -5  -4   3    7.60    0.74
   5  -4  -3    6.52    0.77
   4  -4  -3  106.16    4.21
  -4  -4   3  124.07    5.15
  -4   4   3  125.99    5.18
  -4  -4   3  121.01    4.05
   4  -4  -3  122.23    4.09
   4   4  -3  121.00    4.09
  -4  -4   3  118.95    4.11
  -4  -4   3  119.61    4.18
  -4  -4   3  119.19    4.03
   4  -4  -3  124.33    4.18
   4   4  -3  112.98    5.64
  -4  -4   3  121.88    6.01
   3  -4  -3  344.98   10.79
  -3  -4   3  330.17   11.12
  -3   4   3  337.48   11.16
  -3  -4   3  319.89   10.21
   3  -4  -3  326.53   10.19
   3   4  -3  340.44   10.21
  -3  -4   3  328.10   10.31
  -3  -4   3  315.47   10.14
   3   4  -3  312.84   11.85
  -3   4   3  313.93   10.91
  -3  -4   3  326.74   12.16
  -3  -4   3  321.77   10.24
   2   4  -3    0.23    0.39
  -2  -4   3    0.28    0.72
   2  -4  -3    0.65    0.42
  -2   4   3    0.25    0.46
   2  -4  -3    1.01    0.51
  -2  -4   3    0.14    0.42
  -2   4   3    0.19    0.40
   2  -4  -3    0.47    0.31
  -2  -4   3    0.53    0.30
  -2  -4   3    0.31    0.35
   1   4  -3 1969.35   60.89
  -1  -4   3 1973.42   61.11
  -1   4   3 1891.77   60.37
  -1  -4   3 1977.41   60.11
  -1   4   3 1962.95   60.10
   1  -4  -3 1991.23   60.34
  -1   4   3 1985.39   60.24
  -1  -4   3 2000.71   60.23
   0   4   3 1757.54   53.09
   0  -4   3 1705.26   53.06
   0   4  -3 1749.63   53.60
   0   4   3 1708.41   53.40
   0  -4  -3 1734.99   53.34
   0  -4   3 1737.66   52.97
   0   4   3 1743.18   52.98
   1  -4   3  179.24    6.82
   1   4   3  180.89    6.36
   1  -4   3  180.23    6.34
  -1   4  -3  182.54    6.65
   1   4   3  177.49    6.68
  -1  -4  -3  171.05    6.56
  -2  -4  -3   53.48    1.96
  -2   4  -3   55.40    2.68
   2   4   3   58.06    2.68
   2  -4   3   57.92    2.68
   2   4   3   58.54    3.01
  -2  -4  -3   57.25    2.91
  -2  -4  -3   57.10    2.68
  -2   4  -3   59.99    2.72
  -2  -4  -3   54.81    2.10
   2  -4   3   59.47    2.92
  -2   4  -3   52.16    2.04
  -3   4  -3   36.74    1.42
  -3  -4  -3   38.60    1.50
  -3  -4  -3   37.18    1.55
  -3   4  -3   34.71    1.53
   3  -4   3   37.44    1.49
  -3   4  -3   37.15    1.56
  -3  -4  -3   37.74    1.60
   3   4   3   38.18    2.88
   3  -4   3   40.17    2.25
  -3  -4  -3   37.27    2.23
  -3   4  -3   37.86    2.25
   3   4   3   36.31    2.40
  -3   4  -3   37.30    2.00
   3   4   3   40.35    2.26
   3  -4   3   37.64    2.22
  -4  -4  -3  809.34   25.60
  -4   4  -3  810.26   25.59
   4   4   3  772.02   25.82
  -4  -4  -3  783.75   24.27
  -4   4  -3  788.76   24.18
   4  -4   3  763.46   24.14
  -4  -4  -3  797.71   24.22
  -4   4  -3  785.61   24.23
  -4   4  -3  789.62   24.02
  -4  -4  -3  797.07   24.06
   4  -4   3  804.77   24.95
   4   4   3  710.29   26.49
  -5  -4  -3    4.90    0.57
  -5   4  -3    4.94    0.56
  -5  -4  -3    3.98    0.63
  -5  -4  -3    4.99    0.54
  -5   4  -3    4.95    0.47
  -6   4  -3    4.04    0.54
  -6  -4  -3    2.51    0.65
  -6  -4  -3    3.37    0.55
  -6  -4  -3    4.66    0.61
   6   4   3    3.78    0.62
   6  -4   3    3.70    0.63
  -6   4  -3    3.58    0.45
  -6  -4  -3    3.75    0.62
  -7  -4  -3    0.95    0.57
  -7  -4  -3    1.58    0.54
  -7  -4  -3    1.88    0.50
   7   4   3    1.02    0.56
   7  -4   3    0.76    0.55
  -7  -4  -3    0.97    0.59
  -8  -4  -3   21.50    1.37
  -8  -4  -3   22.13    1.37
   8   4   3   20.62    1.38
   8  -4   3   20.37    1.37
  -8  -4  -3   23.20    1.38
  -9  -4  -3  208.60    6.91
   9   4   3  201.39    6.93
   9  -4   3  193.28    6.91
  -9  -4  -3  209.21    6.91
 -10  -4  -3   18.43    1.08
 -10  -4  -3   17.41    1.06
  10  -4   3   16.21    1.07
  10   4   3   17.71    1.09
  10   5  -3    0.43    0.39
  10  -5  -3    0.03    0.38
  10   5  -3    0.25    0.38
 -10  -5   3    0.20    0.33
 -10   5   3    0.07    0.31
  -9  -5   3   66.42    2.71
  -9   5   3   64.38    2.57
  -9  -5   3   62.00    2.59
   9  -5  -3   65.98    2.72
   9   5  -3   60.35    2.64
   8  -5  -3   79.11    3.18
   8   5  -3   80.75    3.17
  -8  -5   3   81.82    3.21
  -8   5   3   86.76    3.18
  -8   5   3   67.40    2.83
  -8  -5   3   75.66    3.06
  -8  -5   3   73.78    2.91
   7   5  -3   32.83    1.70
   7  -5  -3   32.52    1.71
  -7  -5   3   31.74    1.73
  -7   5   3   28.97    1.46
  -7  -5   3   32.30    1.65
  -7  -5   3   32.47    1.58
   6  -5  -3   18.80    1.16
   6   5  -3   17.92    1.15
  -6  -5   3   18.21    1.21
  -6  -5   3   20.79    1.16
  -6  -5   3   17.67    1.13
  -6   5   3   15.76    0.95
   6  -5  -3   18.88    1.29
   5  -5  -3   46.36    1.95
   5   5  -3   46.23    1.95
  -5  -5   3   43.53    1.90
  -5  -5   3   45.65    1.90
  -5  -5   3   44.92    1.98
  -5  -5   3   47.51    2.07
  -5  -5   3   46.21    1.94
   5  -5  -3   44.86    2.04
   4  -5  -3    0.77    0.44
  -4  -5   3    0.52    0.38
   4  -5  -3    1.45    0.36
   4   5  -3    1.03    0.36
  -4  -5   3    0.77    0.36
  -4  -5   3    0.75    0.51
  -4   5   3    0.53    0.51
  -4  -5   3    0.97    0.44
  -4  -5   3    1.41    0.49
  -4  -5   3    1.05    0.36
   3   5  -3    3.43    0.41
   3  -5  -3    4.44    0.44
  -3  -5   3    3.72    0.49
  -3  -5   3    3.81    0.43
  -3  -5   3    3.70    0.54
  -3  -5   3    3.75    0.71
  -3   5   3    5.04    0.78
  -3  -5   3    4.34    1.20
   3   5  -3    3.86    1.04
  -3   5   3    4.50    0.70
   3  -5  -3    4.28    0.71
   3   5  -3    4.54    0.74
   3  -5  -3    4.40    0.63
  -2  -5   3   16.91    1.87
   2  -5  -3   15.47    0.84
   2   5  -3   15.66    1.69
  -2  -5   3   16.78    0.86
  -2  -5   3   16.30    0.89
  -2  -5   3   16.51    0.87
  -2  -5   3   16.31    0.80
  -2  -5   3   16.99    0.94
  -2  -5   3   16.49    1.23
  -2   5   3   16.63    1.24
   2  -5  -3   16.02    1.24
  -2   5   3   16.14    1.30
   1   5  -3  442.96   14.14
  -1  -5   3  464.22   14.26
  -1  -5   3  446.94   14.17
   1   5  -3  451.75   15.64
  -1   5   3  481.21   14.90
  -1  -5   3  468.15   14.85
  -1  -5   3  456.49   14.73
  -1   5   3  474.18   14.75
  -1   5   3  473.93   15.17
   1  -5  -3  501.69   15.14
   0  -5   3    3.06    0.44
   0  -5   3    4.11    0.41
   0  -5   3    3.53    0.58
   0   5   3    3.86    0.57
   0  -5   3    3.28    0.88
   0   5  -3    4.28    0.90
   0   5   3    2.46    0.70
   0  -5  -3    2.64    0.69
  -1  -5  -3   89.41    3.23
   1  -5   3   91.34    3.13
   1  -5   3   92.61    4.29
   1   5   3   96.73    3.67
   1  -5   3   93.08    3.64
  -1   5  -3   98.83    4.16
   1   5   3   95.22    3.74
   1  -5   3   96.87    3.75
   1   5   3   92.98    4.15
  -2   5  -3   22.41    1.60
   2   5   3   23.03    1.87
   2   5   3   24.99    1.57
   2  -5   3   25.63    1.60
  -2  -5  -3   23.53    1.57
  -2   5  -3   25.14    1.59
  -2  -5  -3   23.14    1.01
  -2  -5  -3   23.67    1.14
   2  -5   3   23.23    1.02
   2  -5   3   22.05    1.03
   2  -5   3   24.87    1.84
  -3   5  -3  268.02    8.75
   3  -5   3  263.55    8.67
  -3  -5  -3  280.40    8.83
  -3  -5  -3  277.82    9.75
  -3   5  -3  286.40    9.77
  -3   5  -3  270.96    9.34
   3   5   3  285.64   10.29
   3   5   3  271.07    9.65
   3  -5   3  276.33    9.68
  -3  -5  -3  276.57    8.66
  -3  -5  -3  265.29    8.70
  -3   5  -3  270.02    8.72
  -3   5  -3  281.60    8.57
  -3  -5  -3  279.40    8.60
   3  -5   3  291.37    9.79
   3   5   3  269.48   11.01
   4  -5   3   26.49    1.30
  -4   5  -3   26.81    1.31
  -4  -5  -3   27.72    1.40
  -4  -5  -3   26.99    1.31
  -4  -5  -3   26.91    1.27
  -4   5  -3   28.67    1.34
   4  -5   3   23.90    1.63
  -4  -5  -3   29.26    1.24
  -4  -5  -3   27.08    2.05
  -4   5  -3   28.06    2.07
  -5   5  -3    4.38    0.55
  -5  -5  -3    4.79    0.71
  -5  -5  -3    4.78    0.63
  -5  -5  -3    4.95    0.55
   5   5   3    4.49    0.57
   5  -5   3    5.70    0.61
  -6  -5  -3    3.05    0.72
  -6  -5  -3    3.55    0.62
  -6  -5  -3    2.80    0.54
   6   5   3    2.92    0.57
   6  -5   3    2.78    0.56
  -6  -5  -3    3.41    0.62
  -7  -5  -3    7.97    0.93
  -7  -5  -3    7.61    0.82
   7  -5   3    8.12    0.87
   7   5   3    7.94    0.85
  -7  -5  -3    8.36    0.90
  -7  -5  -3    7.95    0.83
  -8  -5  -3    0.23    0.51
  -8  -5  -3    0.32    0.50
   8   5   3    0.11    0.54
   8  -5   3    0.53    0.54
  -8  -5  -3    0.65    0.66
  -9  -5  -3   10.08    0.86
  -9  -5  -3   14.19    1.04
   9   5   3   10.93    0.95
   9  -5   3   11.60    0.95
  -9  -5  -3   13.46    1.01
 -10  -5  -3   56.45    2.19
 -10  -5  -3   53.76    2.12
  10   5   3   48.51    2.07
  10  -5   3   50.52    2.10
  10   6  -3    1.16    0.43
  10  -6  -3    0.54    0.33
  10   6  -3    0.57    0.32
 -10  -6   3    1.28    0.37
 -10   6   3    0.96    0.34
  -9  -6   3   14.79    1.09
   9   6  -3   12.60    0.97
   9  -6  -3   13.78    1.02
  -9  -6   3   13.80    0.99
  -9   6   3   15.47    1.02
  -8   6   3    0.99    0.65
  -8  -6   3    0.55    0.63
   8  -6  -3   -0.33    0.50
   8   6  -3    0.68    0.51
  -8  -6   3    0.38    0.52
  -8  -6   3    0.19    0.38
   7  -6  -3  273.18    8.94
   7   6  -3  269.91    8.92
  -7  -6   3  268.37    9.01
  -7  -6   3  274.20    8.91
  -7  -6   3  261.59    8.77
  -6  -6   3   82.48    3.09
   6   6  -3   76.80    3.12
   6  -6  -3   82.91    3.17
  -6  -6   3   82.20    3.26
  -6  -6   3   84.04    3.30
  -6  -6   3   80.96    3.15
  -6  -6   3   83.70    3.12
   6  -6  -3   77.53    3.30
  -5  -6   3  334.39   10.66
   5   6  -3  326.50   10.62
   5  -6  -3  336.33   10.65
  -5  -6   3  338.78   10.75
  -5  -6   3  332.36   10.83
  -5  -6   3  330.58   10.66
   5  -6  -3  344.16   10.81
  -5  -6   3  323.37   10.60
  -4  -6   3   34.16    2.28
  -4   6   3   32.23    2.24
   4  -6  -3   37.30    1.56
   4   6  -3   36.75    1.55
  -4  -6   3   35.05    1.72
  -4  -6   3   35.89    1.59
  -4  -6   3   34.77    1.56
   4  -6  -3   34.20    1.65
  -4  -6   3   37.96    1.64
   3  -6  -3    9.27    1.02
   3   6  -3    9.19    1.00
  -3  -6   3    8.60    0.98
  -3   6   3    9.26    1.03
  -3  -6   3    9.50    0.73
   3  -6  -3    9.21    0.62
   3   6  -3    8.29    0.59
  -3  -6   3    8.31    0.77
  -3  -6   3    8.80    0.65
  -3  -6   3    8.76    0.68
   2  -6  -3   55.82    2.12
   2   6  -3   57.24    3.50
  -2  -6   3   57.05    3.70
  -2  -6   3   54.03    2.18
  -2  -6   3   56.67    2.13
  -2  -6   3   56.73    2.09
  -2  -6   3   56.60    2.21
  -2   6   3   58.49    2.66
  -2   6   3   55.65    2.80
  -2   6   3   58.34    2.75
  -2  -6   3   54.95    2.71
  -2  -6   3   55.06    2.61
   1   6  -3  151.24    4.97
   1   6  -3  157.23    6.56
   1  -6  -3  149.30    4.96
  -1  -6   3  151.32    5.02
  -1  -6   3  154.82    5.12
  -1  -6   3  147.98    5.09
  -1  -6   3  150.96    4.96
  -1   6   3  160.72    5.64
  -1  -6   3  155.32    5.61
  -1  -6   3  157.75    5.51
  -1   6   3  166.56    5.55
  -1   6   3  149.26    5.94
   1  -6  -3  166.01    5.97
   0   6  -3   98.62    3.42
   0  -6   3  102.53    3.61
   0  -6   3   97.30    3.43
   0   6   3  108.74    4.01
   0  -6   3  105.96    3.99
   0   6  -3  103.05    4.73
   0   6   3  111.59    4.59
   0  -6   3  104.62    3.90
   0   6   3  107.80    3.91
   0  -6   3  112.75    5.11
   0  -6   3  109.34    3.53
   1   6   3   35.91    2.35
   1   6   3   36.91    1.89
   1  -6   3   34.46    1.86
  -1   6  -3   33.80    2.24
   1   6   3   36.11    1.83
   1  -6   3   37.24    1.84
   1  -6   3   35.38    1.42
  -1  -6  -3   34.54    1.49
   1  -6   3   37.36    1.47
   1   6   3   34.99    2.78
   1  -6   3   40.66    2.63
  -2   6  -3   38.68    2.33
   2   6   3   40.62    2.69
   2   6   3   41.72    2.18
   2  -6   3   42.38    2.20
  -2  -6  -3   45.50    2.28
  -2   6  -3   43.60    2.25
  -2  -6  -3   41.61    1.59
  -2  -6  -3   42.14    1.75
   2  -6   3   41.89    1.63
   2   6   3   38.61    3.07
   2  -6   3   43.79    2.66
   2  -6   3   40.65    1.63
  -3   6  -3   31.34    1.45
   3  -6   3   32.08    1.39
   3   6   3   30.81    1.98
   3  -6   3   29.70    1.96
  -3  -6  -3   34.23    2.09
  -3   6  -3   28.12    1.94
  -3  -6  -3   34.42    1.38
  -3   6  -3   32.31    1.39
  -3  -6  -3   30.88    1.37
  -3  -6  -3   31.45    1.31
   3  -6   3   32.98    2.14
  -4  -6  -3  244.26    7.83
  -4  -6  -3  236.25    7.99
   4  -6   3  244.54    7.88
  -4   6  -3  245.71    7.90
  -4  -6  -3  247.82    7.79
  -4  -6  -3  236.25    9.10
  -4   6  -3  231.15    9.03
   5  -6   3   23.49    1.17
   5  -6   3   24.04    1.28
   5   6   3   26.51    1.32
  -5  -6  -3   24.67    1.41
  -5  -6  -3   25.65    1.29
  -5   6  -3   24.92    1.28
  -5  -6  -3   27.80    1.52
  -6  -6  -3    0.43    0.55
  -6  -6  -3    0.42    0.42
  -6  -6  -3    0.86    0.59
   6   6   3    0.13    0.43
   6  -6   3    0.61    0.46
  -7  -6  -3    1.20    0.66
  -7  -6  -3    1.71    0.64
  -7  -6  -3    2.13    0.60
  -7  -6  -3    0.65    0.52
   7  -6   3    1.17    0.53
   7   6   3    1.72    0.56
   8   6   3    1.84    0.54
   8  -6   3    2.60    0.59
  -8  -6  -3    2.81    0.72
  -8  -6  -3    2.22    0.64
  -8  -6  -3    1.87    0.51
  -8  -6  -3    2.49    0.60
  -9  -6  -3    0.23    0.52
  -9  -6  -3    0.09    0.41
   9  -6   3    0.48    0.44
   9   6   3   -0.06    0.42
  -9  -6  -3    0.43    0.45
 -10  -6  -3    8.05    0.69
 -10  -6  -3    6.21    0.61
 -10  -7   3    5.71    0.55
  10   7  -3    7.23    0.64
  -9   7   3   16.75    1.02
  -9  -7   3   14.41    0.99
   9   7  -3   10.81    0.84
   9  -7  -3   13.18    0.90
   8  -7  -3   85.10    3.32
   8   7  -3   82.12    3.27
  -8  -7   3   96.48    3.53
  -8   7   3   94.13    3.44
  -8  -7   3   92.67    3.40
  -8  -7   3   74.63    3.07
   7   7  -3   57.09    2.51
   7  -7  -3   58.64    2.55
  -7  -7   3   65.94    2.77
  -7  -7   3   61.87    2.62
  -7  -7   3   61.59    2.48
   6   7  -3  371.73   12.58
   6  -7  -3  403.76   12.65
  -6  -7   3  404.40   12.80
  -6  -7   3  398.53   12.85
  -6  -7   3  412.33   12.71
  -6  -7   3  398.04   12.60
   6  -7  -3  398.81   12.86
  -6  -7   3  385.49   12.64
   5  -7  -3   27.27    1.37
   5   7  -3   25.97    1.33
  -5  -7   3   28.02    1.47
  -5  -7   3   27.17    1.58
  -5  -7   3   28.34    1.46
  -5  -7   3   25.97    1.39
   5  -7  -3   28.91    1.58
   4  -7  -3   34.03    1.49
  -4  -7   3   36.15    1.65
  -4  -7   3   33.30    2.21
  -4  -7   3   34.93    1.74
  -4  -7   3   32.43    1.56
  -4  -7   3   33.14    1.58
  -3  -7   3    1.90    0.44
   3  -7  -3    1.70    0.46
   3  -7  -3    0.84    0.27
  -3  -7   3    1.60    0.47
  -3  -7   3    1.33    0.40
  -3  -7   3    1.15    0.44
  -3  -7   3    1.16    0.51
  -3  -7   3    1.30    0.46
   2  -7  -3  255.60    8.20
  -2   7   3  247.26    9.59
  -2  -7   3  249.10    8.29
  -2  -7   3  262.73    8.21
  -2  -7   3  263.89    8.20
  -2   7   3  251.64    9.12
  -2  -7   3  252.98    8.74
  -2   7   3  262.46    8.79
  -2  -7   3  249.16    8.86
   1   7  -3  118.81    4.02
  -1   7   3  117.47    5.61
  -1  -7   3  121.10    4.10
   1   7  -3  114.28    5.62
  -1  -7   3  125.92    6.09
   1  -7  -3  119.73    4.04
  -1  -7   3  122.29    4.20
  -1  -7   3  116.32    4.17
  -1  -7   3  122.68    4.06
  -1  -7   3  119.90    4.45
  -1   7   3  123.83    4.47
  -1   7   3  125.00    4.56
  -1  -7   3  121.87    4.53
  -1   7   3  117.70    5.06
   0   7   3  736.74   23.05
   0  -7   3  743.38   22.97
   0   7   3  770.81   23.00
   0   7   3  768.40   24.04
   0  -7   3  759.89   23.06
   0   7  -3  727.75   22.52
   0  -7  -3  733.83   22.58
   0  -7   3  739.26   22.75
   0  -7   3  737.89   22.57
   0  -7  -3  703.17   22.50
   0   7   3  762.20   24.89
   0  -7   3  755.70   22.63
   0   7  -3  713.09   24.23
   0  -7   3  774.07   24.86
  -1  -7  -3  444.08   14.29
   1  -7   3  446.25   14.21
  -1   7  -3  453.09   14.12
   1  -7   3  491.46   14.44
  -1   7  -3  451.28   15.62
   1   7   3  438.54   14.69
   1   7   3  458.29   15.80
   1  -7   3  478.01   14.76
   1  -7   3  448.47   14.64
   1   7   3  466.54   14.68
   1  -7   3  472.02   14.27
   1   7   3  465.09   16.68
   1  -7   3  508.04   16.31
   2  -7   3    1.18    0.36
  -2  -7  -3    0.93    0.26
  -2  -7  -3    0.93    0.39
  -2  -7  -3    1.48    0.31
   2   7   3    0.81    0.38
   2  -7   3    0.93    0.37
   2  -7   3    1.87    0.73
  -2   7  -3    0.56    0.50
   2  -7   3    0.98    0.41
   2  -7   3    1.07    0.37
  -3   7  -3   19.88    1.09
   3  -7   3   20.10    1.06
  -3  -7  -3   19.71    0.99
  -3  -7  -3   18.71    0.98
   3  -7   3   18.85    1.47
  -3  -7  -3   20.04    1.55
  -3  -7  -3   20.04    0.97
   3  -7   3   22.89    1.76
   4   7   3   35.27    1.56
   4  -7   3   35.79    1.57
  -4  -7  -3   35.19    1.60
  -4  -7  -3   36.85    1.78
  -4   7  -3   37.02    1.68
  -4  -7  -3   39.43    1.81
   4  -7   3   38.72    1.71
  -4  -7  -3   40.33    1.63
  -4  -7  -3   34.82    2.39
   5  -7   3   12.44    0.85
   5  -7   3   13.14    0.89
   5   7   3   12.41    0.87
  -5  -7  -3   14.09    1.07
  -5  -7  -3   14.98    0.99
  -5  -7  -3   14.86    0.95
  -5  -7  -3   13.92    1.12
  -5   7  -3   14.97    0.95
   5  -7   3   14.71    1.07
  -6  -7  -3   17.26    1.23
  -6  -7  -3   16.68    1.25
  -6  -7  -3   16.65    1.10
   6   7   3   14.58    1.02
   6  -7   3   15.27    1.04
  -7  -7  -3   57.58    2.50
  -7  -7  -3   54.44    2.58
  -7  -7  -3   55.25    2.42
   7   7   3   52.67    2.32
   7  -7   3   55.60    2.36
  -8  -7  -3   21.77    1.34
  -8  -7  -3   20.38    1.34
  -8  -7  -3   19.65    1.22
  -8  -7  -3   19.77    1.26
   8   7   3   17.19    1.13
   8  -7   3   17.89    1.16
  -9  -7  -3    0.73    0.42
   9   7   3    0.57    0.35
   9  -7   3    0.60    0.37
  -9  -7  -3   -0.03    0.42
  -9  -7  -3    0.71    0.52
 -10  -7  -3    0.35    0.29
 -10  -7  -3    0.24    0.35
  10   8  -3    5.05    0.52
  -9  -8   3    2.42    0.53
  -9   8   3    2.91    0.55
  -8  -8   3   15.31    1.19
   8  -8  -3   11.80    0.88
  -8  -8   3   14.77    1.08
  -8   8   3   13.15    1.10
   7  -8  -3   16.43    1.06
  -7  -8   3   17.09    1.32
  -7  -8   3   17.19    1.22
  -7  -8   3   15.60    1.04
  -6  -8   3   25.43    1.47
  -6  -8   3   26.36    1.65
  -6  -8   3   28.67    1.56
   6  -8  -3   27.43    1.70
  -6  -8   3   28.13    1.44
   6  -8  -3   24.77    1.36
  -5  -8   3   21.65    1.36
   5  -8  -3   23.63    1.22
  -5  -8   3   23.56    1.51
  -5  -8   3   23.43    1.35
  -5  -8   3   22.95    1.30
   5  -8  -3   22.74    1.45
  -4  -8   3   -0.03    0.45
  -4  -8   3    0.73    0.48
   4  -8  -3    0.54    0.28
  -4  -8   3    0.87    0.51
  -4  -8   3    0.30    0.55
  -4  -8   3    0.58    0.46
  -3  -8   3  108.92    3.78
  -3  -8   3  103.18    3.73
  -3  -8   3  101.72    3.90
   3  -8  -3  105.30    3.77
  -3  -8   3  104.68    3.73
  -3  -8   3  104.19    3.85
   2  -8  -3    6.46    0.62
  -2  -8   3    6.77    0.74
  -2  -8   3    7.55    0.65
  -2  -8   3    6.34    0.70
   1   8  -3  221.78    7.02
   1  -8  -3  217.60    7.04
  -1  -8   3  219.60    7.11
  -1   8   3  205.08    8.86
  -1  -8   3  229.42    7.26
  -1  -8   3  225.91    7.08
  -1  -8   3  217.01    7.20
  -1  -8   3  206.35    7.31
  -1   8   3  218.10    8.30
  -1  -8   3  211.01    7.27
   0   8  -3    2.02    0.34
   0  -8   3    2.24    0.42
   0  -8  -3    2.32    0.40
   0  -8  -3    2.95    0.38
   0  -8   3    2.35    0.46
   0   8   3    3.04    0.89
   0  -8   3    1.99    0.96
   0   8  -3    3.08    0.89
   0  -8   3    1.73    0.35
   0   8   3    2.60    0.76
   0  -8   3    2.35    0.38
  -1   8  -3   47.98    3.02
   1  -8   3   49.59    2.14
   1  -8   3   46.10    2.15
  -1  -8  -3   51.69    1.83
   1  -8   3   50.04    1.98
   1  -8   3   50.74    2.15
  -1  -8  -3   49.71    2.04
  -1  -8  -3   52.66    1.86
   1  -8   3   53.02    2.04
   1  -8   3   54.62    3.50
   2  -8   3  215.69    8.17
   2  -8   3  250.47    7.91
  -2  -8  -3  248.29    8.03
  -2  -8  -3  246.96    7.78
  -2  -8  -3  253.19    7.79
   2  -8   3  244.76    7.91
   2  -8   3  250.48    9.66
  -3  -8  -3   36.34    1.52
  -3  -8  -3   33.17    1.67
  -3  -8  -3   35.48    1.49
   3  -8   3   33.90    1.58
  -3   8  -3   33.78    1.61
  -4  -8  -3    3.42    0.67
   4  -8   3    1.89    0.35
  -4  -8  -3    2.21    0.46
  -4  -8  -3    2.20    0.62
   4  -8   3    1.98    0.54
  -4  -8  -3    2.08    0.44
  -4   8  -3    2.27    0.50
   5  -8   3  118.27    4.16
  -5  -8  -3  120.26    4.44
   5  -8   3  108.21    4.06
  -5  -8  -3  118.16    4.41
  -5  -8  -3  118.60    4.21
  -5  -8  -3  120.45    4.21
   5  -8   3  121.88    4.38
  -6  -8  -3    7.91    1.00
   6  -8   3    7.89    0.70
  -6  -8  -3    7.75    0.85
  -6  -8  -3    7.90    0.93
  -6  -8  -3    8.06    0.81
   6  -8   3    8.14    0.71
  -7  -8  -3   15.44    1.21
  -7  -8  -3   15.74    1.11
   7  -8   3   14.12    0.97
  -7  -8  -3   16.18    1.28
   8  -8   3    0.03    0.33
  -8  -8  -3   -0.15    0.57
  -8  -8  -3    0.23    0.46
  -8  -8  -3    0.13    0.48
  -9  -8  -3   -0.14    0.48
  -9  -8  -3   -0.18    0.38
  -9  -8  -3   -0.03    0.38
 -10  -8  -3    8.14    0.64
  -9   9   3    1.12    0.45
   9   9  -3    2.25    0.53
  -9  -9   3    1.65    0.45
  -8  -9   3   21.20    1.29
  -8   9   3   22.07    1.35
  -8  -9   3   21.87    1.38
  -7  -9   3   19.38    1.27
  -7  -9   3   22.10    1.21
  -7  -9   3   22.64    1.39
  -6  -9   3   95.59    3.71
  -6  -9   3   96.53    3.70
  -6  -9   3   94.85    3.86
  -6  -9   3   91.02    3.52
   6  -9  -3   97.29    3.84
  -5  -9   3  104.62    4.02
  -5  -9   3  105.31    3.96
  -5  -9   3  104.47    4.14
  -5  -9   3  103.05    3.87
   5  -9  -3  107.23    4.07
  -5  -9   3  107.04    4.03
  -4  -9   3  446.83   14.04
  -4  -9   3  441.49   13.94
  -4  -9   3  435.63   14.10
  -4  -9   3  417.57   13.83
  -4  -9   3  450.47   13.96
  -3  -9   3   69.30    2.86
  -3  -9   3   67.13    2.90
  -3  -9   3   68.31    2.77
   3  -9  -3   69.85    2.78
  -3  -9   3   75.19    2.79
  -3  -9   3   73.25    2.78
  -2  -9   3   37.09    1.83
  -2  -9   3   39.26    1.73
   2  -9  -3   36.87    1.68
   1   9  -3   76.56    2.76
   1  -9  -3   75.44    2.79
  -1  -9   3   76.27    2.97
  -1  -9   3   77.01    2.85
   1  -9  -3   77.39    2.81
  -1  -9   3   76.41    2.86
  -1  -9   3   73.27    2.98
   0  -9  -3   26.07    1.11
   0  -9   3   27.31    1.29
   0  -9  -3   24.27    1.18
   0  -9   3   26.74    1.33
   0  -9  -3   27.78    1.29
   1  -9   3   86.78    3.20
  -1  -9  -3   89.77    3.28
   1  -9   3   94.15    3.43
  -1  -9  -3   93.02    3.08
  -1  -9  -3   84.93    3.04
   1  -9   3   87.00    3.23
   2  -9   3   20.62    1.15
  -2  -9  -3   20.65    1.24
  -2  -9  -3   20.57    1.00
  -2  -9  -3   21.10    1.25
  -2  -9  -3   23.24    1.06
   2  -9   3   20.27    1.16
  -3  -9  -3  159.47    5.48
  -3  -9  -3  164.82    5.78
  -3   9  -3  164.73    5.66
   3  -9   3  171.75    5.65
  -3  -9  -3  168.78    5.51
  -4  -9  -3    1.61    0.46
  -4  -9  -3    1.64    0.63
  -4   9  -3    0.83    0.44
   4  -9   3    1.81    0.62
  -4  -9  -3    1.53    0.42
   5  -9   3   44.54    2.16
  -5  -9  -3   47.20    2.24
  -5  -9  -3   46.36    2.03
  -5  -9  -3   43.77    2.25
  -5  -9  -3   43.81    1.98
   5  -9   3   43.40    1.97
  -6  -9  -3   91.98    3.61
  -6  -9  -3  100.42    3.85
  -6  -9  -3  101.60    3.88
  -6  -9  -3   90.56    3.56
   6  -9   3   93.05    3.50
  -7  -9  -3    7.97    0.93
  -7  -9  -3    8.30    0.84
  -7  -9  -3    9.56    1.05
  -7  -9  -3   10.06    0.93
  -8  -9  -3   83.94    3.19
  -8  -9  -3   80.09    3.08
  -8  -9  -3   79.67    3.21
  -8  -9  -3   78.69    3.14
  -9  -9  -3    1.66    0.43
  -9   9  -3    1.63    0.48
  -9  -9  -3    0.74    0.37
  -9  10   3    1.97    0.44
   9  10  -3    1.77    0.47
  -9 -10   3    1.27    0.38
  -8  10   3   12.21    0.97
  -8 -10   3   10.45    0.90
  -7 -10   3   77.46    3.14
  -7 -10   3   86.16    3.26
  -7 -10   3   78.11    2.96
  -6 -10   3    4.07    0.79
  -6 -10   3    5.49    0.86
  -6 -10   3    4.61    0.76
  -6 -10   3    3.68    0.87
   6 -10  -3    3.19    0.92
  -6 -10   3    4.31    0.63
  -5 -10   3  877.31   27.00
  -5 -10   3  867.65   27.07
  -5 -10   3  855.83   27.01
  -5 -10   3  832.05   27.14
  -5 -10   3  883.36   26.86
   5 -10  -3  885.86   27.09
  -4 -10   3    7.60    0.90
  -4 -10   3    6.94    0.90
  -4 -10   3    6.83    1.02
  -4 -10   3    7.68    0.79
  -4 -10   3    8.49    0.88
  -3 -10   3   79.62    3.20
  -3 -10   3   75.24    3.04
   3 -10  -3   76.82    3.04
  -3 -10   3   76.37    2.99
  -2 -10   3    5.65    0.68
   2  10  -3    6.65    0.64
  -2 -10   3    6.00    0.83
  -2 -10   3    6.30    0.83
   2 -10  -3    6.64    0.70
   1  10  -3   28.12    1.31
   1 -10  -3   28.54    1.37
  -1 -10   3   29.83    1.58
  -1 -10   3   28.93    1.45
   1 -10  -3   28.44    1.39
  -1 -10   3   27.89    1.58
   0 -10   3    0.70    0.45
   0 -10  -3    0.35    0.26
   0 -10  -3    0.44    0.36
   0 -10  -3    0.51    0.39
   0 -10  -3    0.45    0.31
   0 -10   3    0.57    0.47
   1 -10   3   84.45    3.10
  -1 -10  -3   75.67    3.13
  -1 -10  -3   85.53    3.17
   1 -10   3   90.07    3.32
  -1 -10  -3   85.48    2.93
  -1 -10  -3   76.55    2.89
   1 -10   3   83.25    3.14
  -2 -10  -3  206.53    7.03
  -2 -10  -3  220.53    7.43
  -2 -10  -3  231.58    7.45
  -2 -10  -3  232.14    7.16
   2 -10   3  220.95    7.29
  -3 -10  -3    6.66    0.60
  -3 -10  -3    7.33    0.84
   3 -10   3    7.70    0.82
  -3  10  -3    6.10    0.72
  -3 -10  -3    6.76    0.63
  -4 -10  -3   20.98    1.43
  -4 -10  -3   17.32    1.10
  -4 -10  -3   21.34    1.17
   4 -10   3   22.07    1.33
  -4  10  -3   18.31    1.17
   5 -10   3    3.81    0.81
  -5 -10  -3    3.61    0.60
  -5 -10  -3    3.15    0.60
  -5 -10  -3    4.38    0.90
  -5 -10  -3    3.97    0.83
   5 -10   3    3.34    0.61
  -6 -10  -3   40.16    1.94
  -6 -10  -3   41.37    2.14
  -6 -10  -3   44.34    2.23
  -6 -10  -3   42.35    1.97
   6 -10   3   39.78    1.87
  -7 -10  -3    2.43    0.76
  -7 -10  -3    3.00    0.72
  -7 -10  -3    2.54    0.57
  -7 -10  -3    3.54    0.66
  -8 -10  -3   74.94    2.91
  -8 -10  -3   68.19    2.78
  -8 -10  -3   74.08    2.92
  -9 -10  -3    3.48    0.49
  -9  10  -3    3.79    0.51
  -9 -10  -3    2.38    0.44
  -8  11   3    0.71    0.53
   8  11  -3    0.69    0.47
  -8 -11   3    0.32    0.44
  -7 -11   3   95.55    3.74
  -7 -11   3  106.25    3.87
  -6 -11   3  467.31   14.42
  -6 -11   3  437.44   14.11
   6 -11  -3  460.28   14.47
  -6 -11   3  431.18   14.34
  -5 -11   3   93.04    3.83
  -5 -11   3   94.60    3.59
  -5 -11   3   94.65    3.94
  -5 -11   3  100.77    3.84
  -4 -11   3   20.25    1.46
  -4 -11   3   20.45    1.54
  -4 -11   3   18.06    1.33
  -4 -11   3   21.13    1.28
  -3 -11   3  208.60    7.23
   3  11  -3  208.87    6.94
  -3 -11   3  207.92    7.05
   3 -11  -3  201.47    7.03
  -3 -11   3  206.73    6.99
  -2 -11   3    0.79    0.55
   2  11  -3    0.53    0.39
  -2 -11   3    0.68    0.68
  -2 -11   3    0.65    0.64
   2 -11  -3    0.48    0.45
  -2 -11   3    0.49    0.55
   1 -11  -3   31.81    1.35
   1 -11  -3   28.67    1.45
  -1 -11   3   33.31    1.64
  -1 -11   3   31.21    1.70
   1 -11  -3   30.49    1.50
   0 -11  -3    8.15    0.76
   0 -11   3    7.12    0.88
   0 -11  -3    5.74    0.64
   0 -11   3    7.37    0.77
   0 -11  -3    7.02    0.56
   0 -11  -3    7.00    0.64
   0 -11   3    6.59    0.79
   1 -11   3   17.49    1.12
  -1 -11  -3   16.55    1.13
  -1 -11  -3   16.99    1.12
   1 -11   3   15.94    1.22
  -1 -11  -3   15.96    0.90
  -1 -11  -3   14.89    0.87
   1 -11   3   16.49    1.13
  -2 -11  -3   22.95    1.40
  -2 -11  -3   22.65    1.40
  -2 -11  -3   23.96    1.19
   2 -11   3   21.49    1.30
  -3 -11  -3   18.74    1.04
  -3 -11  -3   17.99    1.34
  -3  11  -3   18.91    1.22
   3 -11   3   18.74    1.25
  -3 -11  -3   21.14    1.13
  -4 -11  -3   59.46    2.68
  -4 -11  -3   52.93    2.30
  -4 -11  -3   58.97    2.38
   4 -11   3   59.32    2.57
  -4  11  -3   57.91    2.42
   5 -11   3   56.62    2.62
  -5 -11  -3   57.85    2.70
  -5 -11  -3   58.44    2.42
  -5 -11  -3   62.36    2.79
  -5 -11  -3   58.33    2.45
   5 -11   3   55.48    2.45
  -6 -11  -3    4.21    0.62
  -6 -11  -3    4.58    0.66
  -6 -11  -3    3.15    0.86
  -6 -11  -3    3.12    0.79
   6 -11   3    3.02    0.56
  -7 -11  -3   90.62    3.45
  -7 -11  -3   79.16    3.19
  -7 -11  -3   88.45    3.46
  -7 -11  -3   86.96    3.27
  -8 -11  -3   -0.51    0.43
  -8 -11  -3    0.20    0.39
  -8 -11  -3   -0.34    0.45
  -8 -11  -3    0.02    0.31
  -8 -12   3   15.81    0.98
  -8  12   3   18.30    1.04
   8  12  -3   16.78    0.99
  -7 -12   3    1.91    0.57
   7  12  -3    1.81    0.56
  -6 -12   3    0.20    0.60
   6  12  -3    0.31    0.53
  -6 -12   3    0.28    0.58
   6 -12  -3    0.04    0.65
  -6 -12   3   -0.13    0.36
  -5 -12   3    8.90    0.99
  -5 -12   3   10.27    1.07
  -5 -12   3   11.66    1.23
  -5 -12   3    9.60    0.85
  -4 -12   3    1.79    0.69
  -4 -12   3    2.61    0.83
   4  12  -3    1.40    0.55
  -4 -12   3    1.36    0.82
   4 -12  -3    2.02    0.73
  -4 -12   3    1.49    0.59
  -3 -12   3    2.71    0.83
   3  12  -3    3.10    0.57
  -3 -12   3    3.61    0.73
  -3 -12   3    3.71    0.68
   3 -12  -3    3.59    0.71
  -2 -12   3  112.34    4.44
  -2 -12   3  114.81    4.28
  -2 -12   3  114.69    4.25
   2 -12  -3  113.21    4.23
  -2 -12   3  122.55    4.55
  -1 -12   3    5.18    0.78
   1 -12  -3    5.80    0.61
   1 -12  -3    6.24    0.69
   0 -12  -3  100.11    3.77
   0 -12  -3   95.52    3.68
   0 -12   3  107.74    4.06
   0 -12   3  107.65    3.83
   0 -12  -3   94.71    3.50
   0 -12   3  103.56    3.83
   0 -12  -3  102.52    3.65
  -1 -12  -3   66.93    2.77
   1 -12   3   62.68    2.67
  -1 -12  -3   65.38    2.47
  -1 -12  -3   62.52    2.44
   1 -12   3   64.80    2.89
  -1 -12  -3   68.15    2.72
  -2 -12  -3    0.50    0.54
  -2 -12  -3    0.12    0.56
   2 -12   3    1.13    0.61
  -2  12  -3    0.98    0.57
  -2 -12  -3    0.63    0.36
  -3 -12  -3  100.40    3.93
  -3 -12  -3  101.76    3.93
  -3 -12  -3  100.63    3.61
  -3  12  -3   89.71    3.71
   3 -12   3  102.28    3.83
  -4 -12  -3  101.35    3.59
   4 -12   3   99.85    3.79
  -4 -12  -3   89.61    3.45
   5 -12   3   75.04    3.07
  -5 -12  -3   71.98    3.12
  -5 -12  -3   65.67    2.72
  -5 -12  -3   71.07    2.80
   5 -12   3   71.93    2.89
  -6 -12  -3    4.61    0.62
  -6 -12  -3    4.89    0.91
  -6 -12  -3    4.48    0.82
   6 -12   3    4.07    0.60
  -6 -12  -3    3.77    0.59
  -7 -12  -3    9.55    0.77
  -7 -12  -3    9.66    0.94
  -7 -12  -3    8.03    0.71
  -8 -12  -3    7.17    0.61
  -8 -12  -3    8.10    0.72
  -8  12  -3    8.18    0.69
  -8 -12  -3    8.66    0.74
  -7 -13   3    3.70    0.59
  -7 -13   3    3.96    0.58
   7  13  -3    4.35    0.55
  -6 -13   3    1.13    0.60
   6  13  -3    1.82    0.52
  -6 -13   3    1.49    0.57
  -6 -13   3    1.20    0.36
   6 -13  -3    1.11    0.67
  -5 -13   3    1.06    0.71
   5  13  -3    1.15    0.51
  -5 -13   3    1.79    0.66
  -5 -13   3    1.52    0.47
  -4 -13   3   11.60    1.19
   4  13  -3   10.64    0.88
  -4 -13   3   10.59    1.04
   4 -13  -3    9.83    1.05
  -4 -13   3   11.66    0.94
  -3 -13   3    0.72    0.67
  -3 -13   3    1.38    0.86
   3  13  -3    1.03    0.45
  -3 -13   3    1.24    0.75
  -3 -13   3    1.50    0.59
   3 -13  -3    1.11    0.61
  -2 -13   3    6.36    1.07
  -2 -13   3    4.98    0.80
   2 -13  -3    5.86    0.75
  -2 -13   3    5.85    0.80
  -1 -13   3    2.10    0.70
   1 -13  -3    2.60    0.57
   0 -13  -3   22.15    1.33
   0 -13   3   24.10    1.63
   0 -13  -3   21.72    1.28
   0 -13   3   25.50    1.47
   0 -13  -3   23.35    1.17
   0 -13  -3   24.33    1.28
  -1 -13  -3   10.23    0.95
   1 -13   3   11.78    1.16
  -1 -13  -3   11.43    0.96
   1 -13   3   10.91    1.05
  -1 -13  -3   10.67    0.76
  -2 -13  -3   39.34    2.00
  -2 -13  -3   38.05    1.94
  -2 -13  -3   36.49    1.66
  -2  13  -3   36.72    1.91
   2 -13   3   37.13    1.91
  -3 -13  -3  383.20   12.59
  -3 -13  -3  385.69   12.22
   3 -13   3  386.01   12.47
  -3  13  -3  372.55   12.40
  -3 -13  -3  401.26   12.61
   4 -13   3    9.46    1.03
  -4 -13  -3    8.70    1.03
  -4 -13  -3    8.62    0.76
   4 -13   3    8.81    0.89
   5 -13   3    0.04    0.67
  -5 -13  -3    0.03    0.37
  -5 -13  -3    0.10    0.33
  -5 -13  -3   -0.21    0.70
   5 -13   3    0.33    0.51
  -6 -13  -3    6.16    0.62
  -6 -13  -3    7.68    0.90
  -6 -13  -3    6.90    0.66
  -6 -13  -3    7.33    0.90
   6 -13   3    7.69    0.71
  -7 -13  -3    6.65    0.74
  -7 -13  -3    3.98    0.49
  -7 -13  -3    6.59    0.74
  -7 -13  -3    3.66    0.45
  -7 -14   3    0.44    0.35
  -7 -14   3    0.15    0.33
   7  14  -3    0.28    0.26
  -6 -14   3    0.28    0.45
  -6 -14   3    0.67    0.51
   6  14  -3   -0.35    0.38
  -5 -14   3    5.68    0.85
   5  14  -3    3.56    0.55
  -5 -14   3    3.66    0.54
  -5 -14   3    3.98    0.71
  -4 -14   3   10.00    1.11
  -4 -14   3    7.57    0.77
   4 -14  -3    8.46    0.95
  -4 -14   3    7.67    0.91
  -3 -14   3   31.07    1.73
  -3 -14   3   30.02    1.91
  -3 -14   3   30.68    1.60
   3 -14  -3   30.44    1.68
  -2 -14   3   18.20    1.31
   2 -14  -3   18.85    1.25
  -2 -14   3   18.24    1.26
  -1 -14   3   15.70    1.40
   1 -14  -3   18.77    1.15
  -1 -14   3   16.25    1.27
   0 -14   3    1.81    0.82
   0 -14  -3    1.60    0.47
   0 -14   3    1.94    0.69
   0 -14  -3    2.00    0.50
   0 -14  -3    1.23    0.44
  -1 -14  -3   17.50    1.25
   1 -14   3   21.24    1.37
  -1 -14  -3   21.13    1.28
  -2 -14  -3   53.70    2.43
  -2  14  -3   53.80    2.41
   2 -14   3   51.18    2.38
  -2 -14  -3   49.40    2.08
  -2 -14  -3   55.22    2.43
  -3 -14  -3   34.30    1.86
  -3 -14  -3   33.73    1.53
  -3 -14  -3   32.80    1.81
   3 -14   3   32.66    1.79
  -3  14  -3   31.40    1.65
  -4 -14  -3    9.84    1.04
   4 -14   3   10.45    1.04
  -4 -14  -3   11.44    1.10
  -4 -14  -3    9.20    0.74
   4 -14   3   10.86    0.93
  -5 -14  -3    5.53    0.59
   5 -14   3    6.73    0.72
  -6 -14  -3   10.02    0.90
  -6 -14  -3    9.48    0.89
   6 -14   3    7.79    0.69
  -7 -14  -3    3.68    0.57
  -7 -14  -3    4.04    0.56
  -6 -15   3    4.47    0.59
  -6 -15   3    5.13    0.57
  -5 -15   3    8.24    0.80
  -5 -15   3    7.89    0.88
   5 -15  -3    8.90    0.87
   4 -15  -3   23.04    1.38
  -4 -15   3   20.22    1.31
  -3 -15   3    1.08    0.61
   3 -15  -3    1.75    0.59
  -2 -15   3  161.40    5.46
   2 -15  -3  143.60    5.30
  -1 -15   3    1.18    0.78
  -1 -15   3    1.00    0.68
   1 -15  -3    1.27    0.45
   0 -15   3   21.90    1.54
   0 -15   3   22.56    1.42
   0 -15  -3   18.83    1.12
  -1 -15  -3    9.77    0.91
  -1 -15  -3   11.08    0.92
  -2 -15  -3  214.55    7.28
  -2 -15  -3  219.31    7.27
  -2  15  -3  204.42    7.22
   2 -15   3  215.56    7.27
  -3 -15  -3    3.92    0.73
  -3 -15  -3    3.32    0.70
   3 -15   3    3.55    0.78
  -4 -15  -3   10.10    0.95
   4 -15   3   10.98    0.98
  -4 -15  -3    9.00    0.94
   4 -15   3    9.28    0.84
  -5 -15  -3    4.00    0.67
   5 -15   3    3.25    0.54
  -6 -15  -3    0.73    0.45
   6 -15   3    0.47    0.33
  -5 -16   3    8.73    0.85
  -5 -16   3   10.07    0.76
   5 -16  -3   10.70    0.81
  -4 -16   3    5.16    0.81
  -4 -16   3    5.11    0.69
   4 -16  -3    5.28    0.68
  -3 -16   3   -0.29    0.63
  -3 -16   3    0.96    0.55
   3 -16  -3   -0.09    0.49
  -2 -16   3    0.10    0.53
   2 -16  -3    0.71    0.48
  -1 -16   3   13.01    1.19
  -1 -16   3   14.14    1.09
   1 -16  -3   12.82    0.90
   0 -16   3   33.68    1.75
  -1 -16  -3   15.95    1.04
  -1 -16  -3   13.90    0.99
  -2 -16  -3   13.74    1.01
  -2 -16  -3   12.64    0.97
   2 -16   3   15.34    1.11
  -2  16  -3   13.05    0.96
  -3 -16  -3    2.02    0.55
   3 -16   3    2.94    0.65
  -3 -16  -3    1.85    0.57
   3 -16   3    1.99    0.58
  -4 -16  -3    0.67    0.46
   4 -16   3    0.06    0.51
  -4 -16  -3    0.22    0.50
   4 -16   3    0.52    0.43
  -5 -16  -3   11.08    0.86
  -5 -16  -3    8.86    0.79
   5 -16   3   10.43    0.74
  -4 -17   3   28.92    1.50
  -4 -17   3   32.77    1.41
   4 -17  -3   28.74    1.36
  -3 -17   3   -0.15    0.42
   3 -17  -3    0.43    0.38
  -2 -17   3   48.77    2.22
  -2 -17   3   50.82    2.07
  -1 -17   3   15.47    1.05
   0 -17   3    0.09    0.48
   0  17  -3   -0.13    0.47
   1 -17   3    1.56    0.54
  -1  17  -3    1.73    0.51
  -2 -17  -3   14.34    0.94
  -2 -17  -3   15.02    0.98
  -3 -17  -3    4.95    0.59
   3 -17   3    6.58    0.69
  -3 -17  -3    4.51    0.59
   3 -17   3    4.83    0.59
  -4 -17  -3   27.85    1.35
   4 -17   3   30.47    1.33
  -3 -18   3   11.67    0.73
  -2 -18   3    9.43    0.70
  -1 -18   3   22.16    1.16
   0 -18   3   -0.05    0.40
   0  18  -3    0.08    0.38
   1 -18   3    0.58    0.43
   2 -18   3    1.05    0.42
   2 -18   3    1.50    0.39
   3 -18   3   26.44    1.21
 -10   0   4   34.71    1.51
  10   0  -4   42.74    1.85
   9   0  -4  544.13   17.30
  -8   0   4    0.20    0.53
   8   0  -4   -0.30    0.67
   8   0  -4    0.24    0.39
   7   0  -4  194.85    6.87
  -7   0   4  197.07    6.66
   6   0  -4    9.75    0.94
  -6   0   4   10.42    0.90
   5   0  -4  290.60    9.44
   4   0  -4  213.33    6.91
  -4   0   4  214.41    6.86
  -4   0   4  195.21    8.33
   4   0  -4  208.79    8.09
  -4   0   4  206.04    8.14
   3   0  -4  114.31    3.90
   3   0  -4  120.20    3.99
  -3   0   4  115.11    3.93
  -3   0   4  115.13    5.27
  -3   0   4  119.57    4.97
   3   0  -4  116.07    5.04
   2   0  -4  153.60    4.97
   2   0  -4  156.47    5.04
  -2   0   4  162.30    6.39
  -2   0   4  159.84    5.91
   2   0  -4  160.45    6.15
  -2   0   4  147.30    4.97
  -1   0   4  172.69    6.11
  -1   0   4  169.89    6.20
   1   0  -4  158.14    5.25
  -1   0   4  165.32    6.50
   0   0   4   29.92    1.88
   0   0   4   28.03    2.02
   0   0  -4   29.21    1.94
   0   0   4   32.10    1.84
   0   0  -4   28.62    1.22
  -1   0  -4  186.60    6.02
  -1   0  -4  187.95    6.07
   1   0   4  203.68    7.05
   1   0   4  194.03    6.91
  -1   0  -4  199.50    7.16
  -1   0  -4  186.03    6.08
  -2   0  -4  845.65   25.76
  -2   0  -4  830.02   25.84
  -2   0  -4  836.07   25.87
   2   0   4  859.58   27.16
   2   0   4  864.83   26.97
  -2   0  -4  869.09   26.99
  -2   0  -4  910.08   27.05
  -2   0  -4  836.44   25.86
  -3   0  -4 1554.24   47.54
  -3   0  -4 1530.00   47.67
  -3   0  -4 1577.29   47.61
  -3   0  -4 1577.19   47.66
  -3   0  -4 1632.71   49.04
   3   0   4 1608.37   49.11
  -3   0  -4 1594.56   48.85
  -4   0  -4  228.28    8.92
   4   0   4  234.71    8.84
  -4   0  -4  231.67    8.57
  -4   0  -4  233.15    7.35
  -4   0  -4  217.87    7.49
  -4   0  -4  219.51    7.38
  -4   0  -4  234.24    7.26
  -4   0  -4  227.98    7.48
  -5   0  -4  609.98   18.81
  -5   0  -4  615.01   18.61
   5   0   4  539.44   20.12
  -5   0  -4  592.74   18.65
  -5   0  -4  608.94   18.89
  -6   0  -4  145.07    4.88
  -6   0  -4  139.38    5.04
  -6   0  -4  137.41    4.88
   7   0   4   83.70    3.39
  -7   0  -4   84.51    3.19
  -7   0  -4   79.04    3.16
  -7   0  -4   81.57    3.28
   8   0   4   67.32    2.87
  -8   0  -4   64.98    2.67
  -8   0  -4   57.41    2.58
  -8   0  -4   63.57    2.60
  -9   0  -4   53.19    2.30
   9   0   4   56.37    2.47
  -9   0  -4   51.86    2.22
 -10   0  -4   16.61    1.00
  10   0   4   17.96    1.12
  10   1  -4   46.47    1.95
 -10   1   4   37.39    1.62
   9  -1  -4   41.49    2.04
   9   1  -4   41.51    2.04
  -9  -1   4   39.96    1.78
   8  -1  -4   12.11    0.88
   8   1  -4   14.22    1.04
  -8  -1   4   11.11    0.88
   8  -1  -4   15.16    1.28
   8   1  -4   17.77    1.32
  -8   1   4   17.47    1.15
   7  -1  -4   60.84    2.47
  -7  -1   4   61.34    2.58
  -7   1   4   63.45    2.61
  -7  -1   4   56.64    2.40
   7  -1  -4   64.96    2.79
   7   1  -4   69.29    2.82
   6  -1  -4    0.05    0.34
  -6  -1   4    0.65    0.51
  -6  -1   4    0.05    0.32
   6   1  -4    0.45    0.54
   6  -1  -4   -0.25    0.54
  -6  -1   4    0.18    0.43
  -5  -1   4    0.26    0.40
   5  -1  -4    0.27    0.32
   5   1  -4   -0.03    0.44
   4   1  -4   39.45    1.67
  -4   1   4   36.82    1.62
  -4  -1   4   37.13    1.61
   4  -1  -4   36.68    1.54
  -4  -1   4   32.07    2.64
  -4   1   4   37.54    2.58
   4   1  -4   39.02    2.63
   4  -1  -4   37.51    2.35
  -4   1   4   39.14    2.55
   3   1  -4   17.55    0.96
  -3   1   4   17.73    0.94
  -3  -1   4   17.93    0.95
   3   1  -4   17.49    0.92
   3  -1  -4   18.47    0.89
  -3   1   4   16.54    1.67
  -3  -1   4   21.78    1.95
  -3   1   4   18.75    1.57
   3   1  -4   17.70    1.68
   3  -1  -4   18.27    1.55
  -2   1   4    6.41    0.53
  -2  -1   4    6.86    0.52
   2  -1  -4    6.23    0.48
   2   1  -4    7.11    0.53
  -2   1   4    6.19    0.88
  -2  -1   4    6.82    1.17
  -2   1   4    6.78    1.06
   2   1  -4    6.21    1.02
   2  -1  -4    6.07    0.95
   2   1  -4    6.62    0.54
  -1  -1   4   17.77    1.64
  -1   1   4   16.24    1.52
   1  -1  -4   18.10    1.51
  -1   1   4   17.10    1.39
   1   1  -4   16.61    0.84
   0   1  -4  104.37    3.51
   0   1  -4  102.94    3.54
   0  -1   4  111.18    4.74
   0   1   4  108.22    4.42
   0   1   4  109.96    4.67
   0   1  -4  108.88    4.60
   0  -1  -4  110.18    4.54
   0   1   4  112.49    4.34
  -1   1  -4   18.95    0.93
  -1  -1  -4   19.16    0.97
  -1   1  -4   18.88    0.89
   1   1   4   20.54    1.53
   1   1   4   20.80    1.47
  -1   1  -4   19.18    1.58
   1   1   4   19.08    1.62
  -1  -1  -4   17.36    1.51
  -1  -1  -4   19.34    0.93
  -2   1  -4   32.62    1.38
  -2  -1  -4   31.40    1.38
  -2   1  -4   30.26    1.28
  -2  -1  -4   31.11    1.28
   2  -1   4   33.02    2.20
   2   1   4   30.04    2.14
  -2   1  -4   30.27    2.02
  -2  -1  -4   28.67    2.03
   2   1   4   28.38    1.97
  -2   1  -4   31.61    2.04
  -2   1  -4   31.79    1.39
  -3   1  -4  295.05    9.90
  -3   1  -4  313.54    9.78
  -3  -1  -4  318.90    9.80
  -3   1  -4  318.62    9.85
  -3  -1  -4  312.61    9.88
  -3   1  -4  306.07    9.90
  -3  -1  -4  298.35    9.89
  -3   1  -4  311.51   11.12
   3  -1   4  323.33   11.22
   3   1   4  319.47   11.28
  -3   1  -4  324.76   10.94
  -3  -1  -4  327.88   11.10
  -4   1  -4    0.57    0.44
  -4   1  -4    0.92    0.43
  -4  -1  -4    0.57    0.42
  -4  -1  -4    1.14    0.37
  -4   1  -4    0.96    0.39
  -4   1  -4    0.63    0.35
  -4  -1  -4    0.77    0.27
  -4   1  -4    0.39    0.59
   4  -1   4    0.70    0.55
   4   1   4    1.15    0.67
  -4   1  -4    0.71    0.55
  -4  -1  -4    1.86    0.67
  -5   1  -4  127.22    4.60
  -5   1  -4  129.82    4.39
  -5  -1  -4  124.87    4.40
  -5  -1  -4  131.21    4.35
  -5  -1  -4  121.12    4.53
  -5   1  -4  128.09    4.54
  -6   1  -4    5.59    0.62
  -6  -1  -4    5.36    0.68
  -6  -1  -4    5.51    0.63
  -6   1  -4    5.27    0.62
  -6   1  -4    5.70    0.72
  -6  -1  -4    5.22    0.73
  -7  -1  -4   43.37    2.00
  -7   1  -4   44.71    1.96
   7  -1   4   44.01    2.17
   7   1   4   47.27    2.20
  -7  -1  -4   43.79    1.99
  -7   1  -4   42.16    1.98
  -7  -1  -4   41.22    2.07
  -7   1  -4   40.63    2.02
  -8   1  -4   18.61    1.16
  -8  -1  -4   19.27    1.24
   8  -1   4   20.64    1.47
   8   1   4   22.06    1.48
  -8   1  -4   20.35    1.28
  -8  -1  -4   20.08    1.27
  -8   1  -4   18.41    1.17
  -8  -1  -4   19.01    1.25
  -9  -1  -4    0.28    0.50
  -9   1  -4   -0.10    0.47
   9   1   4    0.46    0.60
  -9  -1  -4    0.86    0.46
  -9   1  -4    0.44    0.39
 -10   1  -4   25.05    1.26
 -10  -1  -4   23.36    1.23
  10   1   4   25.65    1.36
 -10  -1  -4   23.66    1.17
 -10   2   4    0.37    0.31
  10   2  -4   -0.62    0.49
  -9   2   4    1.72    0.55
   9   2  -4    0.61    0.43
  -9  -2   4    1.43    0.47
   9   2  -4    1.58    0.62
  -8   2   4    8.81    0.90
  -8  -2   4    8.65    0.85
   8   2  -4    7.84    0.95
  -8  -2   4    5.94    0.69
  -7   2   4    9.73    0.94
  -7  -2   4    8.98    0.88
  -7  -2   4    6.67    0.69
   7   2  -4    7.30    0.93
   6  -2  -4    1.45    0.38
  -6  -2   4    1.99    0.58
  -6  -2   4    1.21    0.51
  -6  -2   4    1.44    0.41
   6   2  -4    1.43    0.57
   5  -2  -4  103.42    3.43
  -5   2   4   92.86    3.54
  -5  -2   4  100.78    3.58
  -5  -2   4   93.38    3.37
   5   2  -4   97.85    3.62
   4   2  -4   50.10    2.04
   4  -2  -4   52.66    1.91
  -4   2   4   49.22    2.02
  -4  -2   4   49.50    1.99
  -4  -2   4   49.45    2.01
  -4  -2   4   43.94    3.31
   4   2  -4   47.21    3.13
   4  -2  -4   48.55    2.67
  -4  -2   4   49.44    2.95
  -4   2   4   49.78    2.97
  -3  -2   4    0.97    0.39
   3  -2  -4    1.23    0.38
   3   2  -4    1.57    0.40
  -3  -2   4    1.07    0.84
  -3   2   4    0.80    0.62
  -3  -2   4    1.57    0.62
  -3   2   4    1.71    0.68
   3   2  -4    1.19    0.69
   3  -2  -4    1.72    0.62
   3  -2  -4    1.03    0.29
   2  -2  -4  126.22    4.21
   2   2  -4  127.17    4.23
  -2  -2   4  124.76    4.18
  -2  -2   4  127.83    5.71
  -2   2   4  121.46    5.31
  -2  -2   4  128.74    5.09
  -2   2   4  126.98    5.06
   2   2  -4  122.80    5.41
   2  -2  -4  137.48    5.23
  -1   2   4    4.39    0.79
  -1  -2   4    4.33    0.77
  -1  -2   4    4.28    1.01
  -1   2   4    3.54    0.82
  -1  -2   4    4.47    0.77
   1   2  -4    2.80    0.86
   1  -2  -4    5.35    0.89
  -1   2   4    4.26    0.73
   1  -2  -4    3.72    0.41
   1   2  -4    3.83    0.42
   1   2  -4    3.86    0.42
   0  -2  -4  641.66   19.72
   0   2  -4  639.49   19.72
   0   2  -4  653.87   19.71
   0   2  -4  606.27   19.73
   0   2   4  657.38   20.74
   0  -2   4  650.66   20.71
   0   2   4  662.18   21.05
   0   2  -4  682.04   21.05
   0   2   4  686.64   20.64
   0  -2   4  665.87   20.61
  -1  -2  -4    0.12    0.34
  -1  -2  -4   -0.05    0.32
   1   2   4    0.27    0.48
   1   2   4    1.13    0.54
   1  -2   4    0.42    0.45
   1  -2   4    1.07    0.57
   1  -2   4    0.39    0.72
   1   2   4    0.22    0.60
  -1   2  -4   -0.07    0.58
  -1  -2  -4    0.54    0.63
  -1  -2  -4    0.35    0.27
  -1   2  -4    0.40    0.29
  -1  -2  -4    0.44    0.29
  -1   2  -4    0.15    0.27
  -2  -2  -4  157.54    5.20
  -2   2  -4  155.18    5.19
  -2   2  -4  157.28    5.11
   2   2   4  155.83    6.16
   2  -2   4  159.96    6.16
  -2   2  -4  163.45    6.18
  -2  -2  -4  157.11    6.26
  -2  -2  -4  174.33    6.32
  -2   2  -4  168.64    6.24
  -2  -2  -4  158.26    5.23
   2  -2   4  156.98    6.37
  -2   2  -4  151.88    5.21
  -3  -2  -4  169.06    5.71
  -3   2  -4  164.06    5.70
  -3   2  -4  174.60    5.58
  -3  -2  -4  174.20    5.60
  -3  -2  -4  174.06    6.87
  -3   2  -4  178.90    6.93
   3   2   4  175.42    7.08
  -3   2  -4  172.59    6.62
  -3  -2  -4  174.58    6.83
  -3  -2  -4  172.07    5.72
  -3   2  -4  170.80    5.62
  -3   2  -4  169.81    5.70
  -3  -2  -4  174.04    5.72
   3  -2   4  174.97    6.91
   4  -2   4   52.59    3.02
  -4  -2  -4   50.46    3.11
  -4   2  -4   50.59    3.11
   4   2   4   46.96    3.08
  -4   2  -4   45.31    2.66
  -4   2  -4   51.98    2.14
  -4  -2  -4   48.73    2.12
  -4   2  -4   50.97    1.96
  -4  -2  -4   48.39    1.98
  -4  -2  -4   52.41    1.90
  -4  -2  -4   51.12    2.13
  -4   2  -4   49.49    2.07
  -4  -2  -4   49.63    2.08
  -4   2  -4   49.25    1.96
  -5  -2  -4   44.41    1.90
  -5   2  -4   46.51    2.07
  -5   2  -4   45.00    1.85
  -5  -2  -4   43.04    1.81
  -5  -2  -4   43.52    2.02
  -5   2  -4   43.78    1.98
  -6   2  -4    0.78    0.51
  -6  -2  -4    0.52    0.54
  -6   2  -4    0.40    0.41
  -6  -2  -4    0.06    0.46
  -6  -2  -4    0.60    0.42
  -6   2  -4    0.26    0.43
   6   2   4   -0.07    0.54
   7   2   4  180.68    6.07
  -7  -2  -4  168.62    5.87
  -7   2  -4  168.89    5.76
  -7  -2  -4  166.13    5.82
  -7   2  -4  172.81    5.85
  -7  -2  -4  165.45    5.98
  -7   2  -4  166.54    5.88
   8   2   4   12.91    1.17
  -8   2  -4   14.98    1.10
  -8  -2  -4   14.60    1.07
  -8  -2  -4   14.37    1.10
  -8   2  -4   14.65    0.98
  -8  -2  -4   15.04    1.10
  -9   2  -4  114.68    4.13
  -9  -2  -4  106.84    4.06
   9   2   4  114.39    4.24
  -9  -2  -4  116.46    4.12
 -10   2  -4   24.39    1.23
 -10  -2  -4   22.51    1.19
  10   2   4   24.27    1.30
  10  -2   4   24.20    1.30
 -10  -2  -4   22.41    1.17
  10   3  -4    3.89    0.48
  10  -3  -4    6.16    0.70
  10   3  -4    5.63    0.65
   9  -3  -4   22.30    1.43
   9   3  -4   23.50    1.43
  -9   3   4   23.47    1.30
   9   3  -4   24.77    1.33
  -9  -3   4   23.98    1.23
  -8  -3   4  139.57    4.88
  -8   3   4  144.45    4.98
   8  -3  -4  147.78    5.15
   8   3  -4  147.46    5.13
  -7  -3   4   15.86    1.10
  -7   3   4   13.99    1.14
  -7  -3   4   15.14    1.14
   7  -3  -4   14.61    1.19
   7   3  -4   16.08    1.22
  -7  -3   4   13.89    0.97
  -6  -3   4    8.27    0.83
   6  -3  -4    7.08    0.84
   6   3  -4    6.97    0.82
  -6  -3   4    7.09    0.67
  -5  -3   4  198.05    6.46
  -5  -3   4  186.04    6.26
   5  -3  -4  189.71    6.47
   5   3  -4  195.75    6.48
   4  -3  -4    9.34    0.74
   4   3  -4    8.97    0.75
   4  -3  -4    9.34    0.59
  -4  -3   4   10.94    0.79
  -4  -3   4    9.28    0.62
  -4  -3   4   10.15    1.26
  -4   3   4   11.06    1.29
   4  -3  -4    7.91    0.96
   3  -3  -4  693.14   21.01
   3   3  -4  686.77   21.02
   3  -3  -4  689.22   20.85
  -3  -3   4  683.83   20.99
   3  -3  -4  668.65   20.94
  -3  -3   4  664.97   23.25
  -3   3   4  631.10   22.17
  -3  -3   4  678.72   22.19
  -3   3   4  695.83   22.22
   3   3  -4  657.32   22.78
   3  -3  -4  722.12   22.07
   2   3  -4    2.91    0.42
  -2  -3   4    2.32    0.43
   2  -3  -4    2.93    0.39
   2  -3  -4    2.95    0.40
   2   3  -4    2.38    0.39
  -2  -3   4    3.39    0.69
  -2   3   4    3.10    0.67
  -2   3   4    2.74    0.73
  -2  -3   4    4.63    0.81
  -2  -3   4    3.47    0.97
  -2   3   4    1.78    0.69
   2  -3  -4    3.11    0.72
   1   3  -4  608.75   19.03
   1  -3  -4  620.99   19.04
   1   3  -4  618.97   19.03
  -1  -3   4  608.03   19.01
  -1  -3   4  606.68   19.11
   1  -3  -4  621.85   19.09
  -1  -3   4  652.91   20.95
  -1   3   4  639.30   20.11
  -1  -3   4  620.57   20.07
  -1   3   4  628.56   20.34
   1   3  -4  625.22   20.60
   1  -3  -4  650.36   20.20
  -1  -3   4  652.32   19.97
  -1   3   4  653.72   19.97
   0  -3  -4   40.68    1.63
   0  -3  -4   39.46    1.55
   0   3  -4   39.28    1.55
   0   3   4   40.50    2.25
   0  -3   4   38.37    2.22
   0   3   4   41.57    2.51
   0   3  -4   40.22    2.50
   0  -3   4   39.49    2.16
   0   3   4   39.88    2.16
   0   3  -4   39.60    1.54
   1   3   4   85.22    3.62
   1  -3   4   82.42    3.58
   1   3   4   84.52    3.71
   1  -3   4   84.08    3.71
   1   3   4   87.83    4.05
  -1   3  -4   79.66    3.86
  -1  -3  -4   87.52    3.91
  -1   3  -4   83.42    2.84
  -1  -3  -4   82.89    2.81
  -1  -3  -4   83.00    2.88
  -1   3  -4   85.54    2.89
  -1  -3  -4   83.25    2.96
   1  -3   4   83.60    4.08
  -1   3  -4   76.59    2.91
  -1  -3  -4   79.69    2.89
   2   3   4  179.59    6.79
   2  -3   4  170.09    6.70
  -2   3  -4  177.45    6.77
  -2  -3  -4  192.89    7.05
  -2  -3  -4  194.29    6.90
  -2   3  -4  184.83    6.82
  -2   3  -4  177.17    5.68
  -2  -3  -4  173.39    5.68
  -2   3  -4  170.60    5.76
  -2  -3  -4  173.03    5.76
  -2  -3  -4  180.39    5.83
   2  -3   4  186.93    7.12
  -2  -3  -4  179.19    5.80
  -2   3  -4  169.22    5.80
   3   3   4   79.55    4.10
  -3   3  -4   69.99    3.55
  -3  -3  -4   80.32    3.95
  -3  -3  -4   86.60    3.98
  -3   3  -4   76.49    3.82
  -3  -3  -4   77.04    2.87
  -3   3  -4   77.39    2.87
  -3   3  -4   78.26    2.73
  -3  -3  -4   77.80    2.90
  -3   3  -4   78.09    2.78
  -3  -3  -4   78.41    2.89
  -3   3  -4   75.86    2.87
   3  -3   4   74.56    2.70
   3  -3   4   79.74    3.93
  -4   3  -4   -0.03    0.40
  -4  -3  -4    0.35    0.44
  -4   3  -4    0.27    0.41
  -4  -3  -4    0.06    0.43
  -4   3  -4    1.38    0.36
  -4  -3  -4    0.32    0.36
  -4  -3  -4    0.03    0.25
  -4  -3  -4    0.20    0.52
  -4   3  -4    0.10    0.43
   4  -3   4    0.60    0.51
  -5  -3  -4    5.45    0.63
  -5   3  -4    3.85    0.51
  -5  -3  -4    4.24    0.71
  -5   3  -4    4.00    0.62
  -5  -3  -4    4.39    0.49
  -5  -3  -4    4.75    0.66
  -5   3  -4    3.99    0.64
  -6   3  -4    0.14    0.45
  -6  -3  -4    0.38    0.59
  -6   3  -4   -0.05    0.36
  -6  -3  -4    0.65    0.52
  -6  -3  -4    0.06    0.42
  -6  -3  -4   -0.11    0.39
   6   3   4    0.29    0.52
   6  -3   4   -0.07    0.55
   7   3   4   11.08    1.06
   7  -3   4   10.77    1.04
  -7   3  -4   12.83    0.89
  -7  -3  -4   11.96    1.03
  -7  -3  -4   11.11    0.92
  -7   3  -4   11.96    0.97
  -7   3  -4   12.57    0.97
  -7  -3  -4   12.58    1.09
   8   3   4  470.16   14.52
   8  -3   4  451.86   14.50
  -8   3  -4  432.61   14.11
  -8  -3  -4  462.48   14.37
  -8  -3  -4  445.27   14.31
  -8   3  -4  451.22   14.35
  -8  -3  -4  450.68   14.43
  -9  -3  -4    0.42    0.41
  -9   3  -4    1.12    0.54
  -9  -3  -4    0.78    0.48
   9   3   4    0.68    0.55
   9  -3   4    1.26    0.56
  -9  -3  -4    1.24    0.52
 -10   3  -4   93.55    3.48
 -10  -3  -4   93.68    3.43
  10   3   4  101.60    3.58
  10  -3   4  100.57    3.58
 -10  -3  -4  104.00    3.51
  10  -4  -4   17.31    1.02
  10   4  -4   15.80    0.97
   9  -4  -4    0.68    0.53
   9   4  -4    0.56    0.52
  -9   4   4    1.30    0.52
   9   4  -4    0.50    0.47
  -9  -4   4    0.62    0.37
  -9  -4   4    0.37    0.36
  -8   4   4    0.04    0.60
   8   4  -4   -0.36    0.60
   8  -4  -4    0.16    0.58
  -8  -4   4    0.43    0.48
  -8  -4   4    0.06    0.42
   7  -4  -4   -0.16    0.55
   7   4  -4    0.67    0.58
  -7  -4   4    0.65    0.58
  -7  -4   4    0.18    0.44
  -7  -4   4    0.33    0.52
  -6  -4   4   11.92    0.99
   6  -4  -4   10.68    0.96
   6   4  -4   11.55    0.98
  -6  -4   4   10.52    0.82
  -6  -4   4   10.69    0.92
   5  -4  -4    5.20    0.67
   5   4  -4    6.64    0.72
  -5  -4   4    5.99    0.70
  -5  -4   4    6.71    0.61
  -5  -4   4    6.30    0.69
  -4  -4   4  115.78    4.01
   4  -4  -4  117.40    4.06
   4   4  -4  118.55    4.08
  -4  -4   4  115.28    4.08
  -4  -4   4  113.97    3.92
  -4  -4   4  107.03    5.16
  -3  -4   4   70.13    3.53
  -3   4   4   71.87    3.53
   3  -4  -4   71.88    3.36
   3  -4  -4   73.50    2.65
   3   4  -4   73.44    2.66
  -3  -4   4   70.56    2.66
  -3  -4   4   74.59    2.67
   3  -4  -4   72.41    2.57
  -3  -4   4   70.05    2.51
  -3   4   4   66.10    3.52
   3  -4  -4   69.11    2.70
   2  -4  -4  941.18   28.60
   2   4  -4  933.03   28.60
   2   4  -4  924.79   28.61
  -2  -4   4  938.46   28.69
  -2  -4   4  956.31   28.62
   2  -4  -4  924.72   28.60
  -2  -4   4  943.72   30.96
   2  -4  -4  913.01   28.64
  -2  -4   4  972.70   29.67
  -2   4   4  981.23   29.69
  -2   4   4  914.08   29.91
   2  -4  -4  997.45   29.78
  -2   4   4  945.64   29.80
  -2  -4   4  909.85   29.77
   1   4  -4   81.69    2.88
   1  -4  -4   84.17    2.90
   1   4  -4   82.10    2.90
  -1  -4   4   81.12    3.01
   1  -4  -4   86.54    2.97
  -1  -4   4   82.28    2.89
  -1  -4   4   84.44    4.42
   1  -4  -4   83.72    2.89
  -1   4   4   85.96    3.77
  -1  -4   4   81.02    3.72
   1   4  -4   87.57    4.26
  -1   4   4   85.37    4.00
  -1  -4   4   82.55    3.61
  -1   4   4   84.59    3.63
   1  -4  -4   89.54    3.90
   0  -4  -4   89.09    3.07
   0   4  -4   88.63    3.06
   0   4  -4   87.58    3.06
   0  -4  -4   89.98    3.17
   0  -4   4   86.81    3.05
   0  -4   4   93.75    4.59
   0   4   4   93.54    3.93
   0  -4   4   90.43    3.90
   0   4  -4   96.44    4.37
   0   4   4   92.66    4.25
   0  -4  -4   97.23    4.16
   0  -4   4   93.85    3.83
   0   4   4   89.96    3.79
  -1   4  -4    5.82    0.50
  -1  -4  -4    5.81    0.50
  -1  -4  -4    5.51    0.44
  -1   4  -4    5.55    0.48
  -1  -4  -4    5.25    0.52
   1  -4   4    6.52    0.49
   1   4   4    6.39    0.84
   1  -4   4    6.65    0.86
   1   4   4    6.30    0.88
   1  -4   4    6.58    0.91
   1  -4   4    5.99    1.10
  -1   4  -4    6.64    1.01
   1   4   4    6.00    1.05
   2   4   4   28.86    1.95
   2  -4   4   28.68    1.96
   2   4   4   27.64    2.18
  -2   4  -4   27.22    1.95
  -2  -4  -4   29.19    2.12
  -2  -4  -4   30.62    2.02
  -2   4  -4   28.01    1.96
  -2  -4  -4   29.67    1.25
  -2   4  -4   27.55    1.22
  -2  -4  -4   28.31    1.30
  -2   4  -4   29.87    1.31
  -2  -4  -4   29.21    1.38
   2  -4   4   30.34    2.24
  -2  -4  -4   30.07    1.37
  -2   4  -4   30.93    1.38
   2  -4   4   28.30    1.19
  -3  -4  -4    7.71    0.68
  -3   4  -4    8.32    0.70
  -3  -4  -4    7.60    0.61
  -3   4  -4   10.50    0.63
  -3  -4  -4    8.51    0.76
  -3   4  -4    8.47    0.74
   3  -4   4    8.36    0.62
  -3  -4  -4   10.32    1.25
  -3   4  -4    7.99    1.07
   3  -4   4   10.91    1.33
  -3   4  -4    9.71    1.11
  -4   4  -4    0.03    0.42
  -4   4  -4   -0.03    0.43
  -4  -4  -4    0.14    0.40
  -4  -4  -4   -0.12    0.44
  -4   4  -4    0.04    0.29
  -4  -4  -4    0.05    0.25
   4  -4   4    0.09    0.42
  -5  -4  -4   30.56    1.52
  -5   4  -4   32.00    1.65
  -5   4  -4   32.81    1.44
  -5  -4  -4   32.05    1.65
  -5  -4  -4   31.52    1.44
  -5  -4  -4   32.28    1.69
  -5   4  -4   31.38    1.58
   6   4   4   16.73    1.19
   6  -4   4   19.05    1.23
  -6  -4  -4   15.23    1.12
  -6   4  -4   16.67    0.98
  -6  -4  -4   19.23    1.20
  -6  -4  -4   16.52    1.06
  -6  -4  -4   17.06    1.28
  -6   4  -4   18.69    1.17
   7   4   4   28.35    1.60
   7  -4   4   26.12    1.56
  -7  -4  -4   25.73    1.45
  -7  -4  -4   28.95    1.58
  -7   4  -4   25.27    1.29
  -7  -4  -4   27.43    1.46
  -7   4  -4   27.34    1.50
  -7   4  -4   25.80    1.42
  -7  -4  -4   25.66    1.59
   8   4   4   77.40    3.14
   8  -4   4   77.54    3.14
  -8  -4  -4   74.74    3.06
  -8  -4  -4   75.07    3.01
  -8   4  -4   75.76    3.05
  -8  -4  -4   74.42    3.12
  -9  -4  -4   40.10    1.94
  -9   4  -4   45.55    2.03
  -9  -4  -4   45.88    1.99
   9   4   4   45.20    2.08
   9  -4   4   46.12    2.08
  -9  -4  -4   49.20    2.08
 -10   4  -4   10.84    0.75
 -10  -4  -4    8.53    0.68
  10   4   4   11.52    0.80
  10  -4   4   10.43    0.76
 -10  -4  -4    9.87    0.75
  10  -5  -4    6.55    0.60
  10   5  -4    6.03    0.58
  10   5  -4    5.71    0.57
   9   5  -4   17.76    1.13
   9  -5  -4   14.82    1.08
   9   5  -4   16.72    1.09
  -9  -5   4   15.02    0.94
  -9   5   4   18.27    1.08
  -8   5   4    0.11    0.62
   8  -5  -4    0.19    0.52
   8   5  -4    0.34    0.53
  -8  -5   4    0.06    0.40
  -8  -5   4    0.84    0.46
   7   5  -4   20.76    1.36
   7  -5  -4   21.83    1.38
  -7  -5   4   20.66    1.25
  -7  -5   4   21.21    1.28
  -7  -5   4   21.74    1.42
   6  -5  -4   42.10    2.03
   6   5  -4   43.99    2.06
  -6  -5   4   43.49    2.10
  -6  -5   4   44.20    1.94
  -6  -5   4   44.87    2.02
  -5  -5   4    7.63    0.82
  -5  -5   4    8.26    0.79
  -5  -5   4    6.91    0.65
   5  -5  -4    7.71    0.75
   5   5  -4    7.30    0.75
  -4  -5   4    4.70    0.56
  -4  -5   4    4.88    0.64
   4   5  -4    4.70    0.57
   4  -5  -4    4.65    0.57
  -4  -5   4    4.67    0.52
   3  -5  -4   35.75    2.17
  -3  -5   4   34.74    2.30
  -3   5   4   38.06    2.35
   3  -5  -4   38.01    1.59
   3   5  -4   35.93    1.57
  -3  -5   4   38.48    1.68
  -3  -5   4   37.35    1.53
   3  -5  -4   36.11    1.66
  -3  -5   4   37.72    1.63
  -2  -5   4    9.77    1.08
  -2   5   4   11.77    1.16
  -2  -5   4    9.39    1.13
  -2  -5   4    6.23    1.32
  -2   5   4    9.05    1.17
   2  -5  -4    9.70    1.14
  -2   5   4   11.12    1.19
   2   5  -4   11.25    0.69
   2  -5  -4   10.89    0.68
   2   5  -4    9.14    0.69
  -2  -5   4   10.84    0.79
   2  -5  -4   10.18    0.68
  -2  -5   4    9.14    0.61
  -2  -5   4   10.86    0.74
   2  -5  -4    9.89    0.70
  -1   5   4  729.56   22.66
  -1  -5   4  711.21   22.63
   1   5  -4  705.85   23.41
  -1   5   4  710.92   23.02
  -1  -5   4  731.72   22.46
  -1   5   4  731.74   22.46
   1  -5  -4  750.78   22.89
   1  -5  -4  679.80   21.51
   1   5  -4  710.15   21.52
   1   5  -4  701.90   21.55
  -1  -5   4  704.21   21.69
   1  -5  -4  708.25   21.61
  -1  -5   4  672.35   21.44
  -1  -5   4  721.45   21.57
   1  -5  -4  696.87   21.53
   0  -5   4  266.10    8.29
   0  -5   4  271.66   10.24
   0   5   4  270.47    9.25
   0  -5   4  259.09    9.20
   0   5  -4  249.89    9.79
   0   5   4  271.56    9.77
   0  -5  -4  269.06    9.60
   0  -5   4  258.94    9.06
   0   5   4  273.71    9.12
   0  -5  -4  254.43    8.26
   0   5  -4  256.21    8.26
   0   5  -4  256.47    8.28
   0  -5   4  264.74    8.46
   0  -5  -4  265.40    8.40
   0  -5   4  272.77    8.21
   0  -5  -4  253.13    8.27
  -1  -5  -4  151.15    5.03
  -1   5  -4  154.87    5.03
  -1  -5  -4  154.66    4.96
  -1   5  -4  147.21    4.99
   1   5   4  159.66    5.99
   1  -5   4  153.18    5.94
  -1   5  -4  152.72    6.34
   1   5   4  154.25    6.48
   1   5   4  156.79    5.85
   1  -5   4  153.56    5.82
   1  -5   4  156.78    5.01
   1  -5   4  162.75    6.77
   1  -5   4  149.61    4.95
  -1  -5  -4  157.42    5.11
  -2  -5  -4   50.48    1.98
  -2   5  -4   49.74    1.97
  -2  -5  -4   50.79    1.91
  -2   5  -4   50.05    1.89
  -2   5  -4   49.97    2.88
   2   5   4   52.03    3.19
   2   5   4   49.35    2.74
   2  -5   4   47.76    2.70
  -2  -5  -4   51.26    2.11
   2  -5   4   51.43    1.91
   2  -5   4   55.89    3.26
  -2   5  -4   47.57    2.04
  -2  -5  -4   51.80    2.07
   2  -5   4   50.48    1.89
  -3   5  -4   44.17    1.71
  -3  -5  -4   44.24    1.77
  -3  -5  -4   43.28    1.84
  -3   5  -4   43.38    1.85
  -3   5  -4   43.19    1.89
   3  -5   4   42.40    1.75
   3  -5   4   48.26    2.93
  -3  -5  -4   45.82    2.76
  -3   5  -4   43.28    2.67
  -4   5  -4   46.77    1.86
  -4  -5  -4   51.11    2.01
  -4   5  -4   46.49    2.05
  -4  -5  -4   46.81    2.05
  -4  -5  -4   46.26    1.85
  -4  -5  -4   48.14    2.14
  -4   5  -4   51.88    2.10
   4  -5   4   47.82    2.00
  -5   5  -4    0.45    0.31
  -5  -5  -4    0.26    0.34
  -5   5  -4    0.48    0.44
  -5  -5  -4    0.78    0.55
   6  -5   4    9.85    0.91
   6   5   4   12.11    0.96
  -6  -5  -4   11.27    0.95
  -6  -5  -4   10.63    0.98
  -6  -5  -4   10.99    0.85
  -6  -5  -4   10.21    1.06
  -7  -5  -4   -0.63    0.65
  -7  -5  -4    0.10    0.43
  -7  -5  -4    0.57    0.48
   7   5   4    0.27    0.53
   7  -5   4    0.46    0.57
  -7  -5  -4   -0.29    0.65
  -8  -5  -4    2.60    0.65
  -8  -5  -4    2.13    0.54
  -8   5  -4    1.97    0.63
   8   5   4    1.65    0.61
   8  -5   4    2.10    0.59
  -8  -5  -4    2.32    0.65
  -9  -5  -4   12.84    0.99
  -9   5  -4   16.10    1.07
  -9  -5  -4   14.77    0.99
   9   5   4   15.39    1.04
   9  -5   4   15.79    1.05
  -9  -5  -4   17.18    1.11
 -10   5  -4   10.53    0.74
 -10  -5  -4   11.63    0.76
  10   5   4    9.79    0.70
  10  -5   4    8.82    0.68
  10   6  -4    1.62    0.38
  -9   6   4    0.35    0.48
   9   6  -4   -0.18    0.51
  -9  -6   4    0.02    0.34
   9  -6  -4    0.29    0.41
   9   6  -4    0.49    0.41
  -8   6   4    0.80    0.62
   8  -6  -4    0.35    0.51
   8   6  -4    0.55    0.47
  -8  -6   4    1.71    0.50
  -8  -6   4    1.22    0.45
  -7  -6   4   60.13    2.61
   7  -6  -4   60.34    2.54
   7   6  -4   53.79    2.45
  -7  -6   4   52.77    2.37
  -7  -6   4   58.19    2.42
   6  -6  -4    5.82    0.75
   6   6  -4    5.55    0.71
  -6  -6   4    5.23    0.83
  -6  -6   4    5.92    0.69
  -6  -6   4    5.18    0.70
   5   6  -4   50.04    2.17
   5  -6  -4   51.44    2.20
  -5  -6   4   54.05    2.32
  -5  -6   4   52.24    2.19
  -5  -6   4   47.91    2.11
  -5  -6   4   48.81    2.19
   5  -6  -4   51.28    2.35
  -4  -6   4  409.00   13.06
  -4  -6   4  416.23   13.10
  -4  -6   4  416.06   12.96
   4  -6  -4  413.86   13.00
   4   6  -4  403.94   12.98
  -3  -6   4    1.20    0.51
  -3   6   4    0.45    0.49
   3  -6  -4    0.26    0.39
   3   6  -4    0.77    0.34
   3  -6  -4    0.90    0.35
  -3  -6   4    0.40    0.44
  -3  -6   4    0.80    0.33
   3  -6  -4    0.62    0.46
  -2   6   4   23.84    1.76
  -2  -6   4   22.82    1.76
  -2  -6   4   21.45    1.61
  -2   6   4   23.29    1.67
  -2   6   4   22.43    1.86
   2  -6  -4   23.83    1.80
   2  -6  -4   22.77    1.08
   2   6  -4   23.41    1.09
   2   6  -4   21.64    1.13
  -2  -6   4   23.60    1.25
   2  -6  -4   23.95    1.12
  -2  -6   4   22.66    1.07
  -2  -6   4   21.52    1.15
   2  -6  -4   20.80    1.13
  -1  -6   4    0.73    0.29
   1   6  -4    0.77    0.26
   1  -6  -4    0.71    0.28
   1   6  -4    0.69    0.32
  -1  -6   4    0.44    0.46
   1  -6  -4    0.96    0.37
   1  -6  -4    0.80    0.30
  -1  -6   4    0.23    0.36
  -1  -6   4    0.72    0.43
  -1   6   4    1.23    0.48
  -1   6   4    0.97    0.51
  -1  -6   4    0.45    0.46
  -1   6   4    1.90    0.66
   1  -6  -4    0.95    0.56
   0  -6   4 2676.48   78.06
   0  -6   4 2457.99   75.47
   0  -6  -4 2487.92   75.36
   0   6   4 2563.31   76.46
   0  -6   4 2574.49   76.46
   0   6  -4 2438.24   77.32
   0   6   4 2571.97   77.22
   0  -6   4 2530.36   76.27
   0   6   4 2583.69   76.28
   0  -6  -4 2589.58   77.04
   0  -6  -4 2452.80   75.40
   0   6  -4 2450.73   75.38
   0   6  -4 2543.15   75.44
   0  -6   4 2457.27   75.66
   0  -6  -4 2485.44   75.56
   0  -6   4 2498.62   75.38
   0  -6  -4 2491.10   75.44
  -1   6  -4   24.02    2.01
   1   6   4   28.39    1.83
   1  -6   4   26.18    1.77
   1   6   4   32.27    2.37
   1   6   4   26.94    1.71
   1  -6   4   26.25    1.69
  -1  -6  -4   24.74    1.09
  -1   6  -4   25.34    1.14
  -1  -6  -4   23.98    1.15
  -1   6  -4   25.76    1.16
  -1  -6  -4   27.77    1.34
   1  -6   4   25.47    2.32
   1  -6   4   27.24    1.21
   1  -6   4   25.57    1.14
  -1  -6  -4   25.46    1.24
   2   6   4   46.38    2.53
   2  -6   4   48.23    2.54
  -2   6  -4   41.57    2.69
   2   6   4   44.96    2.57
   2  -6   4   43.61    2.55
  -2   6  -4   47.01    1.79
  -2  -6  -4   46.93    1.80
  -2  -6  -4   45.63    1.87
  -2   6  -4   46.94    1.88
  -2   6  -4   47.39    1.98
  -2  -6  -4   47.62    1.98
   2  -6   4   45.54    1.82
   2  -6   4   45.69    3.09
   2  -6   4   49.02    1.84
  -3   6  -4    0.83    0.38
  -3  -6  -4    0.28    0.34
  -3   6  -4    0.07    0.27
  -3  -6  -4    0.43    0.36
   3  -6   4    0.41    0.34
  -3   6  -4    0.26    0.43
  -3  -6  -4   -0.08    0.42
  -3   6  -4   -0.25    0.50
   3  -6   4    0.71    0.60
  -4   6  -4    4.17    0.44
  -4  -6  -4    4.04    0.55
  -4  -6  -4    4.57    0.72
  -4  -6  -4    3.95    0.56
  -4   6  -4    3.84    0.55
   4  -6   4    3.50    0.56
  -4  -6  -4    3.59    0.44
  -4   6  -4    4.42    0.63
   5   6   4    4.48    0.61
   5  -6   4    3.35    0.57
  -5  -6  -4    3.87    0.71
  -5  -6  -4    4.22    0.53
  -5   6  -4    4.49    0.65
  -5  -6  -4    3.54    0.73
   6   6   4    0.21    0.47
   6  -6   4    0.55    0.47
  -6   6  -4    0.30    0.43
  -6  -6  -4    0.80    0.66
  -6  -6  -4    0.23    0.57
  -6  -6  -4    0.20    0.40
   7   6   4  111.13    4.14
   7  -6   4  104.88    4.10
  -7  -6  -4  115.53    4.21
  -7  -6  -4  117.55    4.20
  -7  -6  -4  105.01    4.03
  -7  -6  -4  113.84    4.32
   8   6   4    1.07    0.50
   8  -6   4    0.97    0.50
  -8  -6  -4    1.64    0.62
  -8  -6  -4    1.50    0.58
  -8  -6  -4    1.12    0.47
  -8   6  -4    1.57    0.62
  -8  -6  -4    0.70    0.48
  -9  -6  -4   36.37    1.75
   9   6   4   35.94    1.69
   9  -6   4   34.52    1.68
  -9   6  -4   40.19    1.78
  -9  -6  -4   37.61    1.66
 -10   6  -4    6.80    0.58
 -10  -6  -4    8.93    0.65
  -9   7   4    0.28    0.44
   9  -7  -4    0.39    0.34
  -9  -7   4    0.24    0.33
   9   7  -4    0.35    0.49
   8  -7  -4   95.42    3.59
   8   7  -4   88.01    3.51
  -8  -7   4   91.04    3.53
  -8  -7   4   98.38    3.50
   7  -7  -4    2.62    0.58
   7   7  -4    2.61    0.57
  -7  -7   4    2.38    0.59
  -7  -7   4    2.84    0.59
   6  -7  -4   68.31    2.79
   6   7  -4   66.25    2.76
  -6  -7   4   71.86    2.98
  -6  -7   4   72.72    2.83
  -6  -7   4   65.34    2.77
   5  -7  -4  134.94    4.79
   5   7  -4  139.04    4.80
  -5  -7   4  144.87    5.01
  -5  -7   4  133.59    4.81
  -5  -7   4  132.95    4.84
   5  -7  -4  134.24    5.02
  -5  -7   4  140.17    4.91
   4  -7  -4  181.11    6.11
   4   7  -4  177.13    6.10
  -4  -7   4  183.95    6.28
  -4  -7   4  188.84    6.17
  -4  -7   4  187.84    6.21
   3  -7  -4    1.65    0.37
  -3  -7   4    0.97    0.48
  -3  -7   4    1.12    0.48
  -3  -7   4    1.69    0.42
   3  -7  -4    1.27    0.47
   2  -7  -4   81.77    2.91
   2   7  -4   84.62    3.04
  -2  -7   4   73.85    3.76
  -2  -7   4   79.17    3.69
  -2  -7   4   85.08    3.19
  -2  -7   4   83.73    2.98
  -2  -7   4   84.40    3.06
   2  -7  -4   80.92    3.03
   1  -7  -4   46.18    1.81
   1   7  -4   49.11    1.93
  -1  -7   4   47.93    2.47
  -1   7   4   47.16    2.44
  -1   7   4   45.81    2.93
  -1  -7   4   47.60    1.87
  -1  -7   4   50.70    1.97
   1  -7  -4   46.38    1.88
   0  -7   4  595.16   18.19
   0  -7  -4  581.10   18.05
   0  -7  -4  573.36   18.04
   0   7  -4  588.16   18.12
   0  -7   4  600.83   19.03
   0  -7   4  570.41   18.84
   0   7   4  593.73   18.87
   0  -7   4  591.29   18.39
   0  -7   4  608.47   18.12
   0  -7  -4  580.19   18.13
  -1   7  -4  536.43   16.20
  -1  -7  -4  514.74   16.12
  -1  -7  -4  511.79   16.20
   1  -7   4  504.07   17.09
   1  -7   4  506.42   16.97
   1   7   4  535.01   17.04
   1  -7   4  550.04   18.73
   1  -7   4  530.34   16.28
   1  -7   4  533.67   16.22
  -1  -7  -4  530.27   16.35
  -2  -7  -4   13.77    0.79
  -2   7  -4   14.01    0.78
  -2  -7  -4   13.51    0.82
   2  -7   4   13.82    1.71
   2  -7   4   12.46    1.18
  -2   7  -4   14.31    0.99
   2  -7   4   13.08    0.83
  -2  -7  -4   14.52    0.97
   2  -7   4   13.90    0.86
  -3   7  -4   21.37    1.12
  -3  -7  -4   19.51    1.10
  -3  -7  -4   21.58    1.10
   3  -7   4   18.90    1.58
  -3   7  -4   22.60    1.25
  -3  -7  -4   20.10    1.26
   3  -7   4   21.06    1.13
  -4  -7  -4  210.35    6.95
  -4  -7  -4  209.63    6.82
  -4   7  -4  217.48    7.10
   4  -7   4  203.26    7.00
  -4  -7  -4  214.64    7.21
   5   7   4   20.03    1.16
   5  -7   4   19.46    1.15
  -5  -7  -4   18.72    1.33
  -5  -7  -4   19.63    1.21
  -5  -7  -4   18.19    1.08
  -5  -7  -4   20.81    1.41
  -5   7  -4   21.59    1.26
   6   7   4  170.31    6.08
   6  -7   4  176.53    6.10
  -6  -7  -4  183.88    6.18
  -6  -7  -4  181.71    6.33
  -6  -7  -4  176.42    6.06
  -6  -7  -4  186.73    6.42
  -6   7  -4  177.78    6.10
  -7  -7  -4    9.57    0.96
  -7  -7  -4    8.47    1.00
  -7  -7  -4    9.08    0.82
   7   7   4    7.94    0.78
   7  -7   4    8.49    0.82
  -8  -7  -4   41.79    1.93
  -8  -7  -4   42.74    2.03
  -8  -7  -4   39.42    1.83
  -8  -7  -4   36.48    1.74
  -8   7  -4   41.68    1.91
   8  -7   4   37.36    1.77
   8   7   4   35.68    1.74
   9  -7   4    0.17    0.31
  -9  -7  -4    0.21    0.39
  -9   7  -4    0.27    0.43
  -9  -7  -4    0.44    0.32
  -9  -7  -4    0.30    0.45
  -9  -8   4   18.71    1.05
  -9   8   4   25.95    1.21
   8  -8  -4   51.39    2.22
  -8  -8   4   59.29    2.37
  -8  -8   4   55.58    2.24
   7  -8  -4    0.63    0.40
  -7  -8   4    0.33    0.48
  -7  -8   4    0.75    0.49
   6  -8  -4  101.58    3.88
  -6  -8   4  108.44    4.02
  -6  -8   4  115.03    4.01
  -6  -8   4  104.24    3.99
   5  -8  -4  325.71   10.59
  -5  -8   4  335.48   10.73
  -5  -8   4  325.00   10.70
  -5  -8   4  336.25   10.81
   4  -8  -4  419.72   13.44
  -4  -8   4  433.68   13.73
  -4  -8   4  434.05   13.60
  -4  -8   4  430.50   13.61
   4  -8  -4  424.67   13.73
   3  -8  -4   58.81    2.32
  -3  -8   4   66.51    2.67
   3  -8  -4   64.09    2.57
  -3  -8   4   63.45    2.50
   3   8  -4   61.90    2.54
  -2  -8   4   15.82    1.12
  -2  -8   4   14.02    0.98
   2  -8  -4   14.80    0.95
   2   8  -4   13.83    0.93
  -2  -8   4   14.52    0.92
  -1  -8   4    7.72    0.74
   1  -8  -4    8.56    0.65
  -1  -8   4    7.08    0.64
   1   8  -4    8.06    0.66
   0   8  -4  155.42    5.03
   0  -8  -4  144.83    4.95
   0  -8   4  154.96    5.12
   0  -8  -4  158.63    5.08
   0  -8   4  151.40    5.32
   0  -8   4  145.54    5.02
   0  -8   4  141.53    5.51
  -1   8  -4  206.46    6.71
  -1  -8  -4  206.41    6.63
   1  -8   4  210.95    6.86
  -1  -8  -4  210.38    6.90
   1  -8   4  210.19    6.79
  -2  -8  -4  107.29    3.76
   2  -8   4  109.99    3.86
  -2  -8  -4  112.48    4.02
   2  -8   4  112.95    3.90
  -3  -8  -4    4.83    0.54
  -3  -8  -4    6.19    0.80
  -3  -8  -4    3.56    0.47
   3  -8   4    5.19    0.63
  -3   8  -4    5.49    0.74
   4  -8   4    2.59    0.43
  -4  -8  -4    2.66    0.52
  -4  -8  -4    2.97    0.70
   4  -8   4    2.84    0.62
  -4  -8  -4    2.23    0.40
  -4   8  -4    2.52    0.58
   5  -8   4    4.18    0.53
   5  -8   4    4.44    0.57
  -5  -8  -4    4.39    0.66
  -5  -8  -4    4.36    0.86
  -5   8  -4    4.89    0.67
  -5  -8  -4    5.29    0.84
  -5  -8  -4    4.12    0.54
  -6  -8  -4   16.44    1.25
  -6  -8  -4   15.79    1.10
  -6  -8  -4   14.41    1.26
  -6  -8  -4   12.99    0.96
   6  -8   4   13.40    0.94
  -7  -8  -4   17.71    1.24
  -7  -8  -4   17.96    1.21
  -7  -8  -4   15.87    1.05
   7  -8   4   14.98    1.00
  -7  -8  -4   18.21    1.35
   8  -8   4    2.42    0.43
  -8  -8  -4    3.88    0.70
  -8  -8  -4    2.62    0.47
  -8  -8  -4    2.82    0.57
  -8   8  -4    2.04    0.59
  -9  -8  -4    0.65    0.38
  -9   8  -4    0.34    0.40
  -9  -8  -4    0.52    0.27
  -9   9   4    3.29    0.48
  -9  -9   4    2.11    0.37
   9   9  -4    3.19    0.53
  -8  -9   4  100.18    3.21
   8   9  -4  101.48    3.37
  -7  -9   4   -0.16    0.47
  -7  -9   4   -0.55    0.45
  -6  -9   4  213.77    7.18
  -6  -9   4  206.97    7.07
  -6  -9   4  207.72    7.15
  -5  -9   4   95.86    3.75
  -5  -9   4  101.83    3.87
  -5  -9   4   96.41    3.73
  -4  -9   4    0.04    0.58
  -4  -9   4    0.56    0.49
   4  -9  -4    0.23    0.61
  -4  -9   4    0.47    0.58
  -3  -9   4   18.10    1.28
   3   9  -4   17.41    1.15
  -3  -9   4   17.37    1.12
   3  -9  -4   17.57    1.18
  -2  -9   4    0.66    0.60
  -2  -9   4    0.47    0.44
   2  -9  -4    0.37    0.43
  -2  -9   4    0.40    0.53
   2   9  -4    0.58    0.40
   1   9  -4   38.07    1.62
  -1  -9   4   37.68    1.65
   1  -9  -4   32.55    1.55
  -1  -9   4   33.89    1.65
   0   9  -4    1.35    0.37
   0  -9   4    1.19    0.42
   0  -9  -4    1.16    0.33
   0  -9   4    0.68    0.46
   0  -9   4    1.02    0.61
   0  -9  -4    0.82    0.37
   1  -9   4   81.75    3.04
   1  -9   4   82.20    3.09
  -1  -9  -4   80.98    3.11
  -2  -9  -4   64.12    2.37
   2  -9   4   62.81    2.51
   2  -9   4   62.72    2.53
  -2  -9  -4   64.47    2.65
  -3  -9  -4   36.21    1.61
  -3   9  -4   39.88    1.88
  -3  -9  -4   35.86    1.89
   3  -9   4   35.49    1.73
  -4  -9  -4    0.65    0.42
  -4  -9  -4    0.83    0.65
   4  -9   4    1.27    0.57
  -4  -9  -4    0.61    0.34
  -4   9  -4    1.37    0.55
  -5   9  -4   43.09    1.95
  -5  -9  -4   38.86    1.88
  -5  -9  -4   42.28    2.16
  -5  -9  -4   41.09    2.15
  -5  -9  -4   37.96    1.77
   5  -9   4   42.77    1.84
  -6  -9  -4    2.09    0.78
  -6  -9  -4    2.96    0.79
  -6  -9  -4    2.48    0.49
  -6  -9  -4    3.23    0.66
  -7  -9  -4    5.20    0.90
  -7  -9  -4    5.84    0.83
  -7  -9  -4    4.77    0.59
  -7  -9  -4    4.89    0.73
  -8  -9  -4   18.41    1.11
  -8  -9  -4   17.82    1.18
  -8  -9  -4   16.65    1.06
  -8   9  -4   17.25    1.09
  -9  -9  -4   11.75    0.81
  -9   9  -4   11.19    0.77
  -9  -9  -4   11.81    0.79
   8  10  -4   34.30    1.64
  -8 -10   4   30.86    1.47
   7  10  -4   30.46    1.62
  -7 -10   4   27.34    1.39
  -7 -10   4   27.43    1.49
   6  10  -4   18.49    1.34
  -6 -10   4   18.10    1.25
  -6 -10   4   19.72    1.21
  -5 -10   4    3.46    0.76
   5  10  -4    4.17    0.81
  -5 -10   4    3.87    0.72
  -5 -10   4    3.91    0.72
   4  10  -4   22.10    1.36
  -4 -10   4   20.22    1.31
  -4 -10   4   19.32    1.30
   4 -10  -4   21.38    1.43
  -4 -10   4   20.36    1.44
   3  10  -4   53.06    2.33
  -3 -10   4   51.46    2.32
   3 -10  -4   54.02    2.38
  -3 -10   4   56.32    2.56
   2  10  -4   14.07    0.98
  -2 -10   4   13.12    1.16
  -2 -10   4   15.45    1.06
   2 -10  -4   14.45    1.02
   1  10  -4    7.39    0.67
  -1 -10   4    5.95    0.87
   1 -10  -4    6.71    0.67
  -1 -10   4    7.17    0.72
   1 -10  -4    7.04    0.66
  -1 -10   4    7.08    0.78
   0 -10   4    6.33    0.69
   0  10  -4    5.48    0.56
   0 -10  -4    6.02    0.64
   0 -10  -4    6.15    0.71
   0 -10  -4    5.46    0.55
   0 -10   4    6.63    0.75
  -1 -10  -4   73.90    3.02
  -1 -10  -4   76.25    2.98
   1 -10   4   77.46    3.18
   1 -10   4   71.75    2.90
   1 -10   4   79.28    2.98
  -2 -10  -4  295.01    9.71
  -2 -10  -4  312.53   10.17
  -2 -10  -4  320.39   10.15
   2 -10   4  312.96    9.99
   2 -10   4  313.95   10.00
  -3 -10  -4   34.82    1.60
  -3 -10  -4   37.12    1.91
  -3  10  -4   36.67    1.86
   3 -10   4   37.33    1.79
  -4 -10  -4   87.57    3.32
  -4 -10  -4   88.41    3.67
  -4 -10  -4   88.23    3.24
  -4  10  -4   97.47    3.57
   4 -10   4   89.84    3.52
  -5  10  -4  272.24    8.39
   5 -10   4  251.20    8.51
  -5 -10  -4  261.79    8.64
  -5 -10  -4  252.14    8.31
  -5 -10  -4  266.84    8.69
  -5 -10  -4  238.25    8.17
   5 -10   4  238.42    8.24
  -6 -10  -4    7.24    0.68
  -6 -10  -4    7.91    1.00
  -6 -10  -4    6.98    0.99
  -6 -10  -4    7.79    0.81
  -7 -10  -4    2.45    0.73
  -7 -10  -4    2.56    0.68
  -7 -10  -4    1.46    0.39
  -7 -10  -4    2.67    0.59
  -8 -10  -4    1.76    0.50
  -8 -10  -4    2.03    0.50
  -8  10  -4    1.42    0.49
  -8 -10  -4    0.61    0.48
  -8 -11   4    3.21    0.49
   8  11  -4    5.60    0.62
  -7 -11   4  116.87    4.16
  -7 -11   4  108.79    3.96
  -6 -11   4    9.98    0.96
   6  11  -4   10.30    0.98
  -6 -11   4   10.63    0.94
  -6 -11   4    9.42    0.84
  -5 -11   4   56.69    2.58
   5  11  -4   53.73    2.47
  -5 -11   4   54.12    2.44
  -5 -11   4   54.15    2.36
  -4 -11   4    1.35    0.79
   4  11  -4    1.80    0.60
  -4 -11   4    1.27    0.59
   4 -11  -4    1.54    0.70
  -4 -11   4    3.07    0.65
  -3 -11   4    3.88    0.89
   3  11  -4    3.14    0.62
  -3 -11   4    3.24    0.67
   3 -11  -4    3.22    0.71
  -3 -11   4    4.27    0.76
   2  11  -4    8.45    0.78
  -2 -11   4    9.53    1.09
  -2 -11   4    9.04    0.90
   2 -11  -4    8.44    0.82
   1  11  -4   42.83    1.85
   1 -11  -4   41.46    1.90
  -1 -11   4   43.92    1.99
   1 -11  -4   41.85    1.90
  -1 -11   4   44.11    2.04
  -1 -11   4   44.82    2.30
   0 -11   4    1.65    0.54
   0 -11  -4    1.10    0.42
   0 -11  -4    1.01    0.50
   0 -11  -4    1.55    0.39
   0 -11   4    1.53    0.58
  -1 -11  -4   41.00    2.01
   1 -11   4   39.76    1.91
   1 -11   4   41.90    1.96
  -1 -11  -4   41.25    1.94
  -2 -11  -4    0.76    0.56
  -2 -11  -4    0.77    0.65
   2 -11   4    0.40    0.57
  -2  11  -4    0.64    0.62
  -3 -11  -4  576.32   17.96
  -3  11  -4  587.51   17.92
   3 -11   4  603.43   17.84
  -4 -11  -4   91.62    3.60
  -4 -11  -4   81.03    3.15
  -4 -11  -4   82.83    3.51
  -4  11  -4   87.36    3.38
   4 -11   4   85.05    3.41
  -5 -11  -4    5.86    0.97
   5 -11   4    5.41    0.67
  -5 -11  -4    5.75    0.67
  -6 -11  -4   11.15    1.12
  -6 -11  -4    9.85    0.85
  -6 -11  -4   11.04    1.09
  -7 -11  -4   49.62    2.15
  -7 -11  -4   54.99    2.40
  -7 -11  -4   54.35    2.35
  -8 -11  -4    0.45    0.34
  -8 -11  -4    0.75    0.40
  -8 -11  -4    0.74    0.41
   8  12  -4    0.44    0.33
  -7  12   4    7.46    0.76
   7  12  -4    7.55    0.74
  -7 -12   4    5.40    0.64
  -6 -12   4   14.23    1.08
  -6 -12   4   12.02    0.99
   6  12  -4   14.01    1.05
  -6 -12   4   12.31    0.89
   5  12  -4    2.97    0.64
  -5 -12   4    3.55    0.69
   5 -12  -4    4.76    0.84
  -4 -12   4   20.55    1.47
  -4 -12   4   17.77    1.25
   4  12  -4   17.63    1.20
   4 -12  -4   17.36    1.31
   3  12  -4    4.77    0.68
  -3 -12   4    4.65    0.77
   3 -12  -4    5.24    0.80
   2  12  -4    2.01    0.49
  -2 -12   4    3.77    0.94
  -2 -12   4    1.56    0.64
   2 -12  -4    2.42    0.59
   1 -12  -4   19.81    1.19
  -1 -12   4   22.54    1.36
   1 -12  -4   21.89    1.24
  -1 -12   4   21.59    1.40
  -1 -12   4   23.43    1.65
   0 -12   4    3.57    0.67
   0 -12  -4    3.53    0.63
   0 -12  -4    4.03    0.51
   0 -12   4    3.36    0.74
   0 -12  -4    4.69    0.59
   1 -12   4    6.42    0.80
  -1 -12  -4    5.75    0.73
  -1 -12  -4    4.69    0.76
   1 -12   4    5.41    0.82
  -2 -12  -4  380.44   12.22
   2 -12   4  369.51   12.07
  -2  12  -4  368.64   12.19
  -2 -12  -4  378.06   12.18
  -3 -12  -4    1.17    0.67
  -3 -12  -4    1.09    0.71
  -3  12  -4    0.44    0.57
   3 -12   4    0.55    0.62
  -4 -12  -4    0.52    0.35
  -4 -12  -4   -0.09    0.72
   4 -12   4    0.81    0.68
  -4  12  -4    0.07    0.46
  -5 -12  -4    1.46    0.75
   5 -12   4    1.48    0.48
  -5 -12  -4    0.74    0.40
  -6 -12  -4    0.25    0.37
  -6 -12  -4    0.12    0.62
  -6 -12  -4   -0.38    0.63
  -7 -12  -4    1.27    0.38
  -7 -12  -4    1.51    0.53
  -7 -12  -4    1.24    0.55
  -8 -12  -4    1.35    0.38
  -7 -13   4   14.07    0.87
   7  13  -4   14.78    0.89
  -6 -13   4   19.01    1.20
   6  13  -4   19.42    1.10
  -6 -13   4   17.92    1.12
  -6 -13   4   15.12    0.94
  -5 -13   4    0.66    0.65
   5  13  -4    1.07    0.49
  -5 -13   4    1.10    0.55
   5 -13  -4    1.20    0.67
  -5 -13   4    0.75    0.47
  -4 -13   4    1.17    0.77
   4  13  -4    1.06    0.49
  -4 -13   4    1.59    0.62
   4 -13  -4    1.27    0.63
  -4 -13   4    1.93    0.60
  -3 -13   4  116.17    4.47
   3  13  -4  105.98    3.97
  -3 -13   4  112.06    4.18
   3 -13  -4  110.99    4.18
  -3 -13   4  110.62    4.14
  -2 -13   4   10.14    1.24
  -2 -13   4    9.60    0.94
   2 -13  -4    8.52    0.85
  -1 -13   4  190.82    6.41
   1 -13  -4  180.29    6.22
  -1 -13   4  181.53    6.40
   0 -13  -4   61.71    2.63
   0 -13   4   63.70    2.72
   0 -13   4   61.47    2.74
   0 -13   4   69.75    3.05
  -1 -13  -4    2.97    0.62
  -1 -13  -4    3.24    0.68
   1 -13   4    3.55    0.74
  -2 -13  -4   10.59    1.05
  -2 -13  -4    9.46    0.93
   2 -13   4   10.26    0.99
  -2  13  -4   10.15    1.02
  -3 -13  -4   55.93    2.59
   3 -13   4   56.08    2.49
  -3  13  -4   58.09    2.53
  -3 -13  -4   53.52    2.52
   4 -13   4    3.57    0.76
  -4 -13  -4    3.01    0.76
   5 -13   4    2.95    0.54
  -5 -13  -4    3.15    0.77
  -6 -13  -4    1.27    0.58
  -7 -13  -4    0.58    0.43
  -7 -13  -4    0.21    0.40
  -6 -14   4   17.01    0.96
  -6 -14   4   16.41    1.03
  -5 -14   4    0.56    0.54
   5  14  -4    0.12    0.35
  -5 -14   4    0.10    0.37
   5 -14  -4   -0.43    0.54
  -5 -14   4   -0.14    0.45
  -4 -14   4    2.07    0.75
  -4 -14   4    2.48    0.57
   4 -14  -4    1.48    0.59
  -4 -14   4    1.62    0.59
  -3 -14   4    2.69    0.89
  -3 -14   4    3.23    0.66
   3 -14  -4    2.84    0.61
  -3 -14   4    4.19    0.72
  -2 -14   4  278.00    9.16
   2 -14  -4  258.23    8.70
  -2 -14   4  249.66    8.73
  -2 -14   4  278.96    8.85
   1 -14  -4    0.32    0.40
  -1 -14   4    0.62    0.62
   0 -14  -4    0.99    0.47
   0 -14   4    0.90    0.63
  -1 -14  -4   41.66    2.01
  -1  14  -4   43.36    2.15
   1 -14   4   43.61    2.04
  -1 -14  -4   38.32    1.86
  -2 -14  -4   18.20    1.29
  -2 -14  -4   18.26    1.23
  -2  14  -4   17.66    1.29
   2 -14   4   19.05    1.27
  -3 -14  -4    6.68    0.89
  -3 -14  -4    6.47    0.83
   3 -14   4    7.27    0.88
  -3  14  -4    7.57    0.81
  -4 -14  -4    7.65    0.89
   4 -14   4    9.22    0.96
  -4 -14  -4    9.36    0.97
   4 -14   4    7.53    0.78
  -5 -14  -4   10.16    0.92
   5 -14   4    8.42    0.73
  -6 -14  -4    0.70    0.48
  -6  15   4   89.81    3.09
  -6 -15   4   86.06    3.04
  -5 -15   4    0.32    0.48
  -5 -15   4    0.19    0.38
  -4 -15   4    0.31    0.44
   4 -15  -4    0.36    0.47
  -3 -15   4    0.93    0.71
  -3 -15   4    2.02    0.58
   3 -15  -4    0.89    0.48
  -2 -15   4   30.85    1.84
  -2 -15   4   28.82    1.58
   2 -15  -4   28.59    1.47
  -1 -15   4   19.45    1.25
   1 -15  -4   16.56    1.02
   0 -15   4   17.41    1.20
  -1 -15  -4   54.62    2.32
  -1  15  -4   62.83    2.60
   1 -15   4   60.26    2.46
  -2 -15  -4   19.79    1.27
  -2 -15  -4   17.40    1.16
  -2  15  -4   21.15    1.31
   2 -15   4   21.13    1.31
  -3 -15  -4    0.11    0.52
  -3 -15  -4    0.03    0.48
   3 -15   4    0.64    0.57
  -3  15  -4    0.35    0.42
  -4 -15  -4   -0.28    0.48
   4 -15   4    0.95    0.55
  -4 -15  -4    0.27    0.52
   4 -15   4    0.32    0.41
  -5 -15  -4   20.08    1.14
   5 -15   4   16.28    0.94
  -6 -15  -4    2.90    0.49
  -6 -15  -4    2.40    0.44
  -5 -16   4   23.45    1.10
  -4 -16   4    1.25    0.42
  -3 -16   4   16.06    1.18
  -3 -16   4   16.58    1.01
   2 -16  -4    0.09    0.34
  -2 -16   4    0.56    0.48
  -1 -16   4    6.40    0.74
   1  16  -4    6.41    0.85
   0 -16   4   -0.03    0.53
   1 -16   4    7.77    0.80
  -1  16  -4    9.16    0.86
  -2 -16  -4   -0.08    0.42
  -2 -16  -4   -0.17    0.35
   2 -16   4   -0.22    0.53
  -2  16  -4    0.06    0.43
  -3 -16  -4    1.64    0.45
   3 -16   4    2.87    0.59
  -3 -16  -4    1.98    0.51
   3 -16   4    2.29    0.51
  -4 -16  -4    6.17    0.66
  -4 -16  -4    4.81    0.58
   4 -16   4    5.34    0.56
  -5 -16  -4    4.93    0.54
  -5 -16  -4    3.30    0.47
  -3 -17   4    0.73    0.36
  -2 -17   4    5.11    0.58
   2  17  -4    4.61    0.67
  -1 -17   4   51.08    2.11
   0 -17   4    0.32    0.42
   0  17  -4   -0.22    0.50
  -1  17  -4    6.73    0.71
   1 -17   4    7.86    0.74
   2 -17   4    9.04    0.75
   2 -17   4    9.33    0.79
   3 -17   4    1.50    0.40
   3 -17   4    1.05    0.44
  -1 -18   4    0.41    0.33
   1  18  -4    0.67    0.40
   0 -18   4    0.21    0.33
   1 -18   4    0.59    0.32
   1 -18   4    0.92    0.35
  10   0  -5    0.57    0.39
 -10   0   5    0.10    0.26
   9   0  -5   -0.04    0.55
  -9   0   5    0.55    0.46
   8   0  -5   -0.36    0.40
   8   0  -5   -0.55    0.66
  -7   0   5   -0.32    0.68
   7   0  -5   -0.19    0.42
   7   0  -5   -0.08    0.67
   6   0  -5    0.33    0.44
   6   0  -5    0.67    0.58
  -5   0   5    0.12    0.56
   5   0  -5    0.33    0.41
   5   0  -5    0.27    0.50
  -4   0   5    0.05    0.45
   4   0  -5   -0.02    0.35
   4   0  -5   -0.15    0.43
  -3   0   5    0.20    0.39
   3   0  -5    0.06    0.32
  -3   0   5    0.09    0.46
   3   0  -5   -0.13    0.41
   2   0  -5   -0.41    0.40
   2   0  -5   -0.08    0.31
   2   0  -5    0.07    0.26
  -2   0   5   -0.63    0.58
  -2   0   5   -0.67    0.73
   2   0  -5   -0.10    0.62
  -2   0   5    0.63    0.37
   1   0  -5    0.19    0.33
   1   0  -5    0.04    0.32
   1   0  -5   -0.09    0.28
  -1   0   5    0.14    0.52
  -1   0   5    0.53    0.70
   1   0  -5    0.18    0.52
  -1   0   5    0.10    0.31
   0   0  -5   -0.04    0.33
   0   0   5    0.07    0.46
   0   0   5    0.10    0.68
   0   0  -5    1.66    0.76
   0   0  -5    0.02    0.33
  -1   0  -5    0.07    0.35
  -1   0  -5    0.89    0.38
   1   0   5   -0.22    0.53
  -1   0  -5   -0.09    0.58
  -2   0  -5    0.20    0.35
  -2   0  -5   -0.03    0.40
  -2   0  -5    0.20    0.41
   2   0   5   -0.11    0.66
  -2   0  -5   -0.09    0.56
  -3   0  -5   -0.11    0.39
  -3   0  -5    0.46    0.42
  -3   0  -5    1.01    0.51
  -3   0  -5   -0.24    0.47
  -3   0  -5   -0.10    0.65
  -4   0  -5    0.10    0.39
  -4   0  -5   -0.15    0.37
  -4   0  -5    0.53    0.54
  -4   0  -5    0.11    0.25
  -4   0  -5   -0.17    0.52
  -5   0  -5    0.11    0.47
  -5   0  -5    0.04    0.51
  -5   0  -5    0.18    0.31
  -5   0  -5   -0.16    0.60
  -6   0  -5    0.67    0.39
  -6   0  -5    0.29    0.51
  -6   0  -5    0.73    0.60
  -7   0  -5   -0.20    0.51
  -7   0  -5    0.70    0.58
  -7   0  -5    0.25    0.42
   7   0   5    0.17    0.69
  -8   0  -5    0.09    0.47
  -8   0  -5    0.29    0.50
  -8   0  -5    0.34    0.45
   8   0   5   -0.25    0.69
  -9   0  -5    0.13    0.36
   9   0   5   -0.17    0.52
  -9   0  -5    0.33    0.38
  10   0   5    0.22    0.37
  10   1  -5    3.45    0.54
 -10   1   5    2.60    0.38
  -9  -1   5   68.34    2.76
   9  -1  -5   75.32    3.02
   9   1  -5   76.30    3.01
  -8   1   5    0.24    0.60
   8  -1  -5    0.29    0.67
   8   1  -5    0.50    0.64
   8   1  -5    0.46    0.46
   7  -1  -5    2.03    0.76
   7   1  -5    0.92    0.75
   7  -1  -5    1.37    0.45
   7   1  -5    1.27    0.54
   6  -1  -5    5.64    0.83
   6   1  -5    4.68    0.81
   6  -1  -5    5.54    0.62
   6   1  -5    5.95    0.72
  -5  -1   5  133.23    4.80
  -5   1   5  137.90    4.83
   5  -1  -5  137.48    4.95
   5   1  -5  135.91    4.93
   5  -1  -5  140.90    4.75
   5   1  -5  137.81    4.82
  -4   1   5   30.76    1.51
  -4  -1   5   32.36    1.51
   4   1  -5   31.06    1.55
   4   1  -5   30.14    1.47
   4  -1  -5   31.84    1.44
   3  -1  -5  106.95    3.66
   3   1  -5  106.37    3.69
   3   1  -5  105.75    3.76
  -3   1   5  100.27    3.67
  -3  -1   5  109.09    3.70
  -3   1   5   94.21    5.15
  -3   1   5  103.79    4.91
   3  -1  -5  108.53    5.02
   2  -1  -5    0.40    0.32
   2   1  -5    0.60    0.36
   2   1  -5    0.30    0.35
  -2  -1   5    0.33    0.36
  -2   1   5    0.40    0.33
   2   1  -5    0.74    0.31
  -2   1   5    0.16    0.48
  -2  -1   5    0.95    0.79
  -2   1   5    0.54    0.70
   2   1  -5    0.50    0.61
   2  -1  -5    0.36    0.56
   1  -1  -5  385.50   13.31
  -1   1   5  398.18   13.01
   1  -1  -5  376.13   11.74
   1   1  -5  382.97   11.82
  -1   1   5  381.64   11.69
  -1   1   5  379.86   13.62
  -1  -1   5  385.67   13.78
   1   1  -5  363.59   11.78
   1  -1  -5  368.30   11.72
   0   1   5   86.61    4.39
   0   1  -5   86.29    4.22
   0   1   5   76.78    3.80
   0   1  -5   81.67    2.95
   0   1  -5   83.52    2.91
   0  -1  -5   82.63    2.89
   0  -1   5   82.23    2.81
   0  -1   5   87.93    4.50
   0   1  -5   80.92    2.97
   0  -1  -5   81.55    2.93
   1   1   5  277.79    9.91
  -1   1  -5  281.14   10.21
  -1  -1  -5  283.29   10.26
  -1   1  -5  275.56    8.69
  -1   1  -5  270.45    8.76
  -1  -1  -5  285.40    8.85
   1  -1   5  261.16   10.41
  -1   1  -5  268.61    8.79
  -1  -1  -5  270.87    8.77
  -2   1  -5    9.53    0.68
  -2   1  -5   10.28    0.81
  -2  -1  -5   10.32    0.82
   2  -1   5    9.02    1.37
   2   1   5    8.47    1.34
  -2   1  -5    9.50    1.29
  -2   1  -5    9.89    0.78
  -3   1  -5    5.48    0.57
  -3   1  -5    5.72    0.63
  -3  -1  -5    5.81    0.65
  -3   1  -5    5.39    0.69
  -3   1  -5    5.19    0.66
  -3  -1  -5    6.17    0.60
  -3  -1  -5    6.82    0.73
  -4   1  -5   81.26    3.43
  -4   1  -5   94.80    3.31
  -4  -1  -5   91.73    3.31
  -4  -1  -5   88.95    3.10
  -4  -1  -5   91.73    3.49
  -4   1  -5   89.25    3.45
  -4  -1  -5   93.16    3.42
  -4   1  -5   92.48    3.36
  -5   1  -5   97.90    3.62
  -5   1  -5   97.19    3.86
  -5  -1  -5  100.05    3.65
  -5  -1  -5  101.04    3.51
  -5   1  -5  100.90    3.53
  -5  -1  -5   99.67    3.85
  -5   1  -5   97.51    3.81
  -6   1  -5    0.90    0.51
  -6  -1  -5    0.45    0.54
  -6   1  -5    0.76    0.44
  -6  -1  -5    1.01    0.42
  -6   1  -5    0.97    0.60
  -6  -1  -5    1.00    0.64
  -7  -1  -5   25.12    1.46
  -7   1  -5   25.40    1.43
   7   1   5   26.42    1.63
   7  -1   5   26.29    1.62
  -7   1  -5   24.60    1.38
  -7  -1  -5   25.52    1.38
  -7   1  -5   26.36    1.56
  -7  -1  -5   26.97    1.60
  -8  -1  -5  101.95    3.76
  -8   1  -5   98.87    3.68
   8   1   5  104.36    3.97
   8  -1   5  102.31    3.95
  -8   1  -5  103.91    3.73
  -8  -1  -5   94.07    3.65
  -8   1  -5   97.15    3.76
  -8  -1  -5  101.92    3.85
  -9  -1  -5    0.57    0.38
  -9   1  -5    1.29    0.44
   9   1   5    0.62    0.54
  -9  -1  -5    1.09    0.44
  -9   1  -5    1.27    0.38
  10   1   5    0.43    0.38
 -10  -1  -5    0.18    0.25
  10  -2  -5    2.20    0.48
  10   2  -5    2.48    0.46
 -10   2   5    2.02    0.36
   9   2  -5  102.36    3.62
  -9  -2   5   95.05    3.35
  -8  -2   5   67.28    2.73
  -8   2   5   62.74    2.72
   8   2  -5   67.88    2.92
   8   2  -5   66.88    2.74
   7   2  -5    4.20    0.82
   7   2  -5    4.25    0.72
  -6   2   5    0.31    0.67
   6   2  -5   -0.23    0.60
   6   2  -5    0.20    0.51
   6  -2  -5   -0.25    0.34
  -5  -2   5   55.32    2.25
  -5   2   5   49.92    2.22
   5   2  -5   51.65    2.30
   5  -2  -5   50.79    2.06
   5   2  -5   48.87    2.19
  -4  -2   5    8.31    0.78
  -4   2   5    9.08    0.83
   4   2  -5    9.40    0.81
   4   2  -5    7.99    0.74
   4  -2  -5    7.70    0.63
   3  -2  -5   11.22    0.72
   3   2  -5   11.44    0.81
   3   2  -5   12.30    0.86
  -3  -2   5   11.39    0.82
  -3   2   5   12.02    0.82
   3   2  -5   10.68    0.72
  -3   2   5   10.00    1.43
   3  -2  -5   11.63    1.37
  -2  -2   5   75.97    3.69
  -2   2   5   78.10    3.76
   2  -2  -5   69.88    3.79
   2  -2  -5   72.66    2.60
   2   2  -5   74.82    2.72
   2  -2  -5   72.00    2.70
  -2   2   5   73.75    2.63
  -2   2   5   70.99    4.07
   2   2  -5   68.16    2.63
  -1   2   5  213.05    8.46
   1   2  -5  205.33    8.35
   1  -2  -5  214.88    8.25
  -1  -2   5  224.05    7.96
  -1   2   5  220.43    7.92
   1   2  -5  205.49    6.77
   1  -2  -5  211.40    6.72
   1  -2  -5  213.04    6.81
   1   2  -5  216.46    6.82
  -1  -2   5  211.74    6.74
  -1   2   5  204.94    6.67
  -1  -2   5  222.16    8.85
   1   2  -5  199.99    6.78
   1  -2  -5  207.17    6.70
   0  -2  -5   98.90    3.50
   0   2  -5  101.72    3.51
   0  -2  -5   98.90    3.42
   0   2  -5   99.93    3.47
   0   2   5  101.79    4.96
   0   2  -5  103.35    4.87
   0  -2   5  100.31    4.44
   0   2   5  102.09    4.47
   0  -2   5  100.14    3.38
   0   2  -5   98.53    3.54
   0  -2  -5  103.01    3.49
  -1   2  -5  193.16    6.27
  -1  -2  -5  190.78    6.28
  -1   2  -5  185.26    6.20
  -1  -2  -5  189.41    6.19
   1   2   5  200.81    7.41
   1  -2   5  199.50    7.38
   1   2   5  190.78    7.88
  -1   2  -5  191.72    7.66
  -1  -2  -5  193.96    7.67
  -1  -2  -5  197.07    6.38
   1  -2   5  184.22    7.90
  -1  -2  -5  191.67    6.29
  -2  -2  -5  201.34    6.73
  -2   2  -5  208.35    6.75
  -2   2  -5  201.18    6.63
   2   2   5  205.10    7.88
   2  -2   5  207.83    7.87
  -2   2  -5  200.18    8.03
  -2  -2  -5  204.59    6.80
   2  -2   5  219.54    8.61
  -2   2  -5  203.11    6.78
  -2  -2  -5  208.48    6.78
  -3  -2  -5  729.61   21.66
  -3   2  -5  679.39   21.56
  -3   2  -5  700.79   21.46
  -3   2  -5  681.71   21.63
  -3   2  -5  686.52   21.63
  -3  -2  -5  704.48   21.66
  -4  -2  -5  119.80    4.26
  -4   2  -5  114.24    4.12
  -4   2  -5  109.76    4.26
  -4  -2  -5  119.88    4.31
  -4   2  -5  121.14    4.29
  -4  -2  -5  117.43    4.12
  -4   2  -5  116.52    4.08
  -5   2  -5  180.25    6.07
  -5  -2  -5  180.03    6.11
  -5   2  -5  175.03    6.30
  -5  -2  -5  177.05    6.30
  -5   2  -5  182.56    6.28
  -5  -2  -5  183.11    5.94
  -6  -2  -5  105.82    3.88
  -6   2  -5  102.30    3.80
  -6  -2  -5   99.83    3.70
  -6   2  -5  104.65    3.78
  -6   2  -5  108.89    4.03
  -6  -2  -5  102.97    4.06
  -7   2  -5    7.69    0.78
  -7  -2  -5    7.27    0.86
  -7   2  -5    8.28    0.90
  -7  -2  -5    8.59    0.97
  -7   2  -5    8.32    0.81
  -7  -2  -5    8.40    0.77
   7   2   5    7.66    0.94
  -8   2  -5    3.94    0.56
  -8  -2  -5    3.89    0.70
  -8   2  -5    2.47    0.55
  -8  -2  -5    4.07    0.69
  -8   2  -5    3.60    0.65
  -8  -2  -5    3.15    0.55
   8   2   5    3.76    0.78
  -9  -2  -5    0.55    0.43
  -9  -2  -5    0.47    0.39
  -9  -2  -5    0.59    0.36
  -9   2  -5    0.52    0.42
   9   2   5    0.70    0.52
  10   2   5   16.43    0.97
  10  -2   5   15.66    0.96
 -10  -2  -5   15.91    0.85
 -10   3   5    0.15    0.28
  10  -3  -5    0.27    0.33
  10   3  -5    0.11    0.33
   9   3  -5   60.02    2.45
  -9  -3   5   61.73    2.43
   9  -3  -5   62.18    2.63
   9   3  -5   60.74    2.61
  -9   3   5   68.96    2.54
   8   3  -5    1.63    0.57
  -8  -3   5    1.96    0.58
  -8   3   5    1.56    0.66
   8  -3  -5    2.13    0.70
   8   3  -5    1.62    0.65
  -7  -3   5   39.15    1.91
   7   3  -5   36.19    1.90
   7  -3  -5   39.11    2.02
   7   3  -5   37.33    1.99
  -6   3   5   26.78    1.56
   6   3  -5   26.53    1.54
   6  -3  -5   27.54    1.61
   6   3  -5   26.46    1.59
  -5   3   5  167.69    5.63
   5  -3  -5  164.04    5.68
   5   3  -5  160.57    5.68
   5   3  -5  162.14    5.62
   5  -3  -5  156.75    5.34
   4  -3  -5   54.27    2.01
   4   3  -5   50.60    2.18
  -4   3   5   54.05    2.19
   4  -3  -5   51.92    2.08
   4  -3  -5   54.85    2.24
   4   3  -5   55.36    2.24
   3  -3  -5  103.01    3.45
  -3   3   5   94.57    3.54
   3  -3  -5  105.56    3.61
   3  -3  -5   97.83    3.61
   3   3  -5  101.15    3.63
   3  -3  -5   99.97    4.73
  -2  -3   5   87.01    4.18
  -2   3   5   90.21    4.23
   2  -3  -5   89.12    4.36
   2  -3  -5   92.36    3.22
   2   3  -5   94.01    3.24
   2  -3  -5   88.36    3.07
   2   3  -5   90.44    3.21
  -2   3   5   87.63    3.14
  -2  -3   5   91.23    3.19
   2  -3  -5   93.12    3.26
  -2   3   5   78.80    4.48
   2   3  -5   80.07    3.14
  -1   3   5   44.51    3.02
  -1  -3   5   43.14    2.59
  -1   3   5   47.31    2.68
   1  -3  -5   42.42    2.77
   1  -3  -5   47.18    1.86
   1   3  -5   46.31    1.86
   1   3  -5   45.72    1.85
   1  -3  -5   47.32    1.77
  -1   3   5   46.91    1.76
   1  -3  -5   46.29    1.93
  -1  -3   5   46.33    1.81
   1  -3  -5   45.27    1.76
   1   3  -5   40.73    1.83
   0  -3  -5  414.64   12.70
   0   3  -5  409.42   12.69
   0   3  -5  408.02   12.66
   0  -3  -5  408.83   12.59
   0   3   5  425.51   14.56
   0   3  -5  390.65   14.32
   0  -3  -5  400.45   14.18
   0  -3   5  416.12   13.85
   0   3   5  418.47   13.86
   0  -3  -5  402.79   12.79
   0  -3   5  404.45   12.58
   0   3  -5  385.20   12.73
   0  -3  -5  399.61   12.65
  -1  -3  -5   23.45    1.18
  -1   3  -5   23.84    1.18
  -1  -3  -5   23.49    1.10
  -1   3  -5   23.22    1.13
  -1   3  -5   21.84    1.97
   1   3   5   24.23    1.82
   1  -3   5   22.82    1.78
  -1  -3  -5   23.55    1.25
   1  -3   5   23.31    1.04
   1  -3   5   24.19    2.25
  -1  -3  -5   23.68    1.19
  -2  -3  -5   99.30    3.55
  -2   3  -5   98.55    3.54
  -2   3  -5   98.17    3.44
  -2  -3  -5   97.32    3.43
   2   3   5  103.63    4.60
   2  -3   5   93.80    4.46
  -2  -3  -5   99.68    3.60
   2  -3   5  101.42    5.12
  -2  -3  -5   99.82    3.57
  -2   3  -5   95.04    3.58
  -3   3  -5    0.30    0.49
  -3   3  -5    0.02    0.35
  -3   3  -5    0.78    0.38
  -3  -3  -5    0.56    0.46
  -3  -3  -5    0.61    0.46
  -3   3  -5    1.18    0.47
  -4   3  -5   49.01    2.00
  -4  -3  -5   48.22    2.16
  -4   3  -5   44.19    2.13
  -4  -3  -5   47.71    2.20
  -4   3  -5   49.85    2.18
  -4   3  -5   45.80    1.95
  -5   3  -5   46.98    1.92
  -5   3  -5   42.39    2.11
  -5  -3  -5   42.19    1.97
  -5  -3  -5   40.61    2.10
  -5  -3  -5   41.14    1.75
  -5  -3  -5   41.88    2.14
  -5   3  -5   48.61    2.14
  -6   3  -5    5.53    0.65
  -6  -3  -5    4.99    0.75
  -6  -3  -5    5.40    0.60
  -6   3  -5    5.55    0.67
  -6   3  -5    5.99    0.79
  -6  -3  -5    5.36    0.87
   7   3   5  106.93    3.95
   7  -3   5  100.16    3.91
  -7  -3  -5  101.28    3.81
  -7   3  -5   98.79    3.63
  -7  -3  -5   93.77    3.67
  -7  -3  -5   94.97    3.62
  -7   3  -5  100.76    3.71
  -7   3  -5   96.34    3.79
  -7  -3  -5  105.66    3.99
  -8  -3  -5   -0.04    0.53
  -8   3  -5    0.56    0.47
  -8  -3  -5   -0.22    0.37
   8   3   5    0.44    0.58
   8  -3   5    0.36    0.61
  -8   3  -5    0.25    0.36
  -8  -3  -5   -0.34    0.53
  -9  -3  -5   57.18    2.33
  -9  -3  -5   66.75    2.43
   9   3   5   66.01    2.50
   9  -3   5   59.71    2.44
  -9   3  -5   57.68    2.30
 -10  -3  -5    0.21    0.29
  10   3   5   -0.02    0.31
  10  -3   5    0.06    0.32
  10  -4  -5    1.92    0.37
  10   4  -5    0.86    0.33
   9   4  -5   56.96    2.31
  -9  -4   5   58.37    2.23
   9  -4  -5   56.67    2.40
   9   4  -5   52.14    2.34
  -9   4   5   59.31    2.34
   8   4  -5   39.82    1.99
   8  -4  -5   42.05    2.07
   8   4  -5   42.27    2.06
  -8  -4   5   43.50    1.95
   7   4  -5   12.68    1.10
  -7  -4   5   13.20    1.09
   7  -4  -5   13.96    1.16
   7   4  -5   12.61    1.12
  -6   4   5  246.64    8.31
  -6  -4   5  254.82    8.29
   6  -4  -5  250.69    8.37
   6   4  -5  246.66    8.37
   6   4  -5  241.87    8.33
  -5   4   5   10.09    0.98
   5  -4  -5   11.03    0.97
   5   4  -5   11.68    0.98
  -4   4   5  202.74    6.90
  -4  -4   5  209.65    6.94
   4  -4  -5  210.87    6.97
   4   4  -5  208.11    6.97
   3  -4  -5   86.98    3.22
  -3  -4   5   87.40    3.27
   3  -4  -5   89.28    3.07
   3   4  -5   91.82    3.31
   3  -4  -5   90.57    3.29
   3   4  -5   90.10    3.30
   2  -4  -5  289.27    9.27
   2   4  -5  295.51    9.29
   2   4  -5  281.28    9.27
   2  -4  -5  290.59    9.10
   2  -4  -5  287.49    9.30
  -2  -4   5  301.69    9.28
  -2   4   5  266.54   10.88
  -2  -4   5  288.48   10.49
  -2   4   5  289.27   10.50
   2  -4  -5  287.63   10.65
  -1   4   5  129.55    6.13
  -1  -4   5  137.87    5.69
  -1   4   5  135.97    5.67
   1  -4  -5  140.32    4.66
   1   4  -5  139.12    4.66
   1  -4  -5  137.50    4.52
   1   4  -5  137.73    4.66
  -1   4   5  132.45    4.53
   1  -4  -5  140.80    4.75
  -1  -4   5  144.05    4.64
   1  -4  -5  135.84    4.54
   0  -4   5  243.89    8.68
   0   4   5  241.79    8.67
   0   4  -5  227.07    7.51
   0  -4  -5  236.17    7.45
   0  -4  -5  236.21    7.56
   0   4  -5  234.38    7.56
   0  -4  -5  233.70    7.66
   0  -4   5  241.76    7.50
   0  -4  -5  227.35    7.52
   0   4  -5  229.84    7.63
   1   4   5   22.74    1.79
   1  -4   5   22.52    1.76
  -1  -4  -5   22.55    1.17
  -1   4  -5   22.95    1.17
  -1  -4  -5   23.32    1.09
  -1   4  -5   22.57    1.12
   1  -4   5   23.48    1.09
  -1  -4  -5   23.21    1.19
  -2  -4  -5    0.50    0.40
  -2   4  -5    0.16    0.36
  -2   4  -5    0.55    0.34
  -2  -4  -5    0.36    0.41
  -2  -4  -5    0.59    0.35
  -2  -4  -5    0.09    0.46
   2  -4   5    0.40    0.53
   2   4   5    0.25    0.45
   2  -4   5    0.17    0.25
  -2   4  -5    0.03    0.42
   3  -4   5    0.46    0.33
  -3   4  -5    0.26    0.50
  -3  -4  -5    0.43    0.52
  -3   4  -5    0.67    0.37
  -3  -4  -5    0.60    0.39
  -3   4  -5    0.50    0.35
  -3  -4  -5    0.15    0.42
  -3   4  -5    0.80    0.46
  -4  -4  -5   18.37    1.21
  -4  -4  -5   19.10    1.26
  -4   4  -5   19.52    1.24
  -4   4  -5   18.06    1.03
  -4   4  -5   18.35    1.22
  -5   4  -5  202.17    7.02
  -5  -4  -5  206.08    7.03
  -5   4  -5  206.89    6.74
  -5  -4  -5  189.20    6.58
  -5  -4  -5  215.77    7.12
  -5   4  -5  214.75    7.01
   6  -4   5   18.51    1.30
   6   4   5   20.65    1.33
  -6  -4  -5   21.23    1.34
  -6  -4  -5   20.17    1.31
  -6   4  -5   19.37    1.13
  -6  -4  -5   18.09    1.09
  -6  -4  -5   20.97    1.50
  -6   4  -5   20.69    1.34
   7   4   5  244.53    8.10
   7  -4   5  243.76    8.09
  -7  -4  -5  234.14    7.94
  -7   4  -5  236.61    7.77
  -7  -4  -5  239.10    8.00
  -7  -4  -5  227.05    7.78
  -7   4  -5  241.79    7.92
  -7   4  -5  241.67    8.01
  -7  -4  -5  240.16    8.19
   8   4   5  189.87    6.40
   8  -4   5  183.59    6.38
  -8  -4  -5  199.28    6.35
  -8   4  -5  187.12    6.24
  -8  -4  -5  187.00    6.43
   9  -4   5    0.23    0.43
   9   4   5    0.29    0.43
  -9  -4  -5    1.12    0.48
  -9  -4  -5    0.32    0.35
  -9   4  -5    0.55    0.40
  -9  -4  -5    0.23    0.29
 -10  -4  -5   15.17    0.83
  10  -4   5   14.07    0.82
   9   5  -5   -0.32    0.42
  -9  -5   5    0.04    0.33
   9  -5  -5   -0.08    0.41
   9   5  -5    0.27    0.39
  -9   5   5   -0.30    0.47
   8   5  -5    4.61    0.75
  -8  -5   5    5.66    0.68
   8  -5  -5    4.95    0.73
   8   5  -5    5.08    0.72
   7   5  -5   39.05    1.96
  -7  -5   5   37.72    1.86
   7  -5  -5   38.69    1.95
   7   5  -5   37.31    1.91
  -7   5   5   36.25    1.95
  -6  -5   5    1.75    0.65
   6  -5  -5    0.15    0.52
   6   5  -5    1.14    0.54
  -6   5   5    0.85    0.73
   5  -5  -5    1.77    0.54
   5   5  -5    1.56    0.55
  -5   5   5    1.60    0.66
   4   5  -5    0.19    0.52
  -4  -5   5    0.78    0.43
  -4  -5   5    0.52    0.53
   4   5  -5    0.68    0.44
   4  -5  -5    1.10    0.47
   3   5  -5   79.50    3.05
  -3  -5   5   80.77    3.08
   3  -5  -5   81.79    2.96
  -3  -5   5   78.68    3.03
   3  -5  -5   79.54    3.01
   3   5  -5   79.95    3.01
   2   5  -5   12.59    0.84
   2  -5  -5   12.82    0.84
   2   5  -5   12.03    0.87
  -2  -5   5   11.64    0.91
   2  -5  -5   13.39    0.88
  -2  -5   5   13.07    0.87
  -2  -5   5   13.27    1.40
  -2   5   5   13.05    1.40
   1  -5  -5  253.04    7.81
   1   5  -5  247.73    7.99
   1  -5  -5  254.74    7.98
   1   5  -5  242.76    7.96
   1  -5  -5  244.15    8.05
  -1  -5   5  240.38    7.95
  -1  -5   5  246.66    9.08
  -1   5   5  243.41    9.06
   0  -5   5   88.59    4.10
   0   5   5   88.87    4.10
   0  -5  -5   88.33    3.20
   0   5  -5   89.88    3.21
   0  -5  -5   92.64    3.10
   0   5  -5   88.16    3.19
   0  -5  -5   88.48    3.33
   0  -5   5   91.86    3.19
   0  -5  -5   87.79    3.18
   1  -5   5    2.53    0.35
  -1   5  -5    1.90    0.50
  -1   5  -5    3.62    0.47
  -1   5  -5    2.79    0.45
  -1  -5  -5    2.40    0.44
  -1  -5  -5    2.11    0.45
  -1  -5  -5    2.81    0.40
   1  -5   5    2.89    0.43
   1   5   5    3.21    0.73
   1  -5   5    3.09    0.71
   2   5   5    4.96    0.88
   2  -5   5    5.59    0.92
  -2  -5  -5    7.06    0.65
  -2  -5  -5    5.87    0.56
  -2   5  -5    6.20    0.63
  -2   5  -5    5.59    0.55
  -2  -5  -5    5.18    0.63
  -2  -5  -5    6.12    0.75
   2  -5   5    5.31    0.50
  -2   5  -5    5.27    0.68
   2  -5   5    5.41    0.50
  -3  -5  -5   31.88    1.49
  -3   5  -5   32.84    1.46
  -3  -5  -5   31.17    1.58
  -3   5  -5   31.94    1.59
  -3   5  -5   33.54    1.69
   3  -5   5   32.21    1.44
  -4  -5  -5    7.08    0.88
  -4   5  -5    7.87    0.81
  -4  -5  -5    8.46    0.84
  -4   5  -5    6.63    0.63
  -4  -5  -5    8.66    0.77
  -4   5  -5    8.39    0.84
  -5   5  -5   15.18    0.95
  -5  -5  -5   15.69    1.16
  -5   5  -5   14.30    1.14
  -5   5  -5   16.59    1.19
  -5  -5  -5   14.62    1.26
   6   5   5   36.79    1.88
   6  -5   5   34.89    1.84
  -6  -5  -5   38.37    1.94
  -6   5  -5   38.09    1.67
  -6  -5  -5   37.42    1.66
  -6  -5  -5   36.77    2.03
   7   5   5  148.09    5.23
   7  -5   5  143.99    5.22
  -7  -5  -5  148.30    5.19
  -7  -5  -5  151.62    5.21
  -7  -5  -5  133.31    4.93
  -7   5  -5  147.15    5.11
  -7   5  -5  145.85    5.13
  -7  -5  -5  145.35    5.37
  -8  -5  -5   12.28    1.05
  -8  -5  -5   10.07    0.78
  -8   5  -5   12.51    0.94
   8  -5   5   11.76    0.97
   8   5   5   12.07    0.99
  -8  -5  -5   13.47    1.04
  -9  -5  -5    4.09    0.57
  -9  -5  -5    3.60    0.57
  -9   5  -5    3.47    0.53
   9   5   5    3.99    0.55
   9  -5   5    2.90    0.51
  -9   6   5    4.78    0.59
   9   6  -5    3.79    0.48
   9  -6  -5    3.51    0.50
   9   6  -5    3.99    0.57
  -9  -6   5    2.67    0.41
   8   6  -5    4.47    0.65
   8  -6  -5    4.98    0.70
  -8  -6   5    5.50    0.65
   8   6  -5    5.96    0.81
  -7   6   5    7.50    0.94
   7  -6  -5    6.97    0.81
   7   6  -5    5.72    0.75
  -7  -6   5    5.80    0.64
  -7  -6   5    7.03    0.81
   6  -6  -5   53.38    2.36
   6   6  -5   54.37    2.36
  -6   6   5   54.04    2.43
  -6  -6   5   46.62    2.12
  -6  -6   5   54.18    2.36
   5   6  -5   37.79    1.94
  -5  -6   5   35.87    1.67
   5  -6  -5   37.54    1.83
   5   6  -5   37.82    1.83
   4   6  -5   62.26    2.65
  -4  -6   5   64.75    2.64
  -4  -6   5   58.27    2.41
   4  -6  -5   65.74    2.59
   4   6  -5   66.63    2.60
   3  -6  -5   60.12    2.34
   3   6  -5   57.77    2.33
   3   6  -5   56.59    2.38
  -3  -6   5   58.52    2.45
   3  -6  -5   53.28    2.23
  -3  -6   5   56.13    2.19
  -3  -6   5   59.28    2.39
  -2  -6   5    4.37    0.46
   2   6  -5    4.41    0.53
   2  -6  -5    4.71    0.54
   2   6  -5    5.07    0.63
  -2  -6   5    3.54    0.63
   2  -6  -5    4.12    0.55
  -2  -6   5    3.58    0.59
  -2  -6   5    4.17    0.82
  -2   6   5    3.42    0.79
  -1  -6   5    8.62    1.09
  -1   6   5    7.21    1.02
   1  -6  -5    7.09    0.62
   1   6  -5    7.63    0.63
   1   6  -5    7.73    0.69
  -1  -6   5    7.20    0.78
   1  -6  -5    7.36    0.70
  -1  -6   5    7.28    0.55
  -1  -6   5    7.81    0.68
   0  -6   5   87.50    4.00
   0   6   5   87.02    4.00
   0   6  -5   82.62    3.09
   0  -6  -5   82.96    2.95
   0   6  -5   84.37    3.08
   0  -6  -5   87.42    3.10
   0  -6  -5   89.26    3.25
   0  -6   5   89.28    3.13
   0  -6   5   83.35    2.96
   0  -6  -5   86.04    3.09
   1  -6   5  728.38   24.22
   1   6   5  753.62   24.29
  -1  -6  -5  744.56   23.10
  -1   6  -5  751.52   23.11
  -1  -6  -5  750.57   22.97
  -1   6  -5  752.43   23.05
  -1  -6  -5  777.73   23.31
   1  -6   5  767.22   23.06
  -1   6  -5  710.82   23.23
   1  -6   5  742.25   22.95
  -1  -6  -5  754.61   23.16
  -2  -6  -5    0.36    0.34
  -2   6  -5    0.31    0.38
  -2   6  -5    0.02    0.33
  -2  -6  -5    0.22    0.45
  -2  -6  -5    0.44    0.33
   2  -6   5    0.07    0.33
  -2   6  -5    0.17    0.51
   2  -6   5    0.06    0.31
  -3   6  -5  261.29    8.29
  -3  -6  -5  257.66    8.34
  -3   6  -5  255.92    8.46
  -3  -6  -5  252.29    8.45
  -3   6  -5  262.88    8.58
   3  -6   5  252.35    8.32
  -3  -6  -5  263.64    8.58
  -4   6  -5    0.31    0.32
  -4  -6  -5    0.44    0.43
  -4   6  -5    0.58    0.45
  -4  -6  -5    0.65    0.47
  -4   6  -5    0.63    0.56
  -5   6  -5    3.13    0.48
  -5  -6  -5    3.22    0.64
  -5   6  -5    3.54    0.70
  -5  -6  -5    4.23    0.87
   6  -6   5    8.19    0.85
   6   6   5    7.99    0.82
  -6  -6  -5    8.34    0.95
  -6   6  -5    9.66    0.90
  -6  -6  -5    8.38    1.04
   7   6   5   -0.11    0.46
   7  -6   5    0.14    0.47
  -7  -6  -5    0.17    0.70
  -7  -6  -5    0.33    0.53
  -7  -6  -5   -0.20    0.34
  -8  -6  -5   11.36    0.99
  -8   6  -5   10.00    0.85
   8   6   5    9.43    0.82
   8  -6   5    8.57    0.81
  -8  -6  -5   12.32    0.97
  -9  -6  -5    3.69    0.53
  -9  -6  -5    4.85    0.61
  -9   6  -5    4.00    0.52
   9   6   5    3.37    0.47
   9  -6   5    3.69    0.49
   9   7  -5   19.32    1.11
  -9   7   5   21.19    1.09
   8  -7  -5    1.34    0.43
   8   7  -5    0.60    0.38
  -8  -7   5    0.83    0.43
   7  -7  -5   10.24    0.89
   7   7  -5    9.61    0.86
  -7   7   5   11.91    1.09
  -7  -7   5    9.03    0.78
  -7  -7   5   10.37    0.90
   6   7  -5    3.71    0.86
   6  -7  -5    3.22    0.61
   6   7  -5    4.03    0.64
  -6   7   5    3.90    0.90
  -6  -7   5    3.53    0.58
  -6  -7   5    5.09    0.78
   5  -7  -5  703.21   21.08
   5   7  -5  673.93   21.04
  -5  -7   5  682.72   21.11
   5   7  -5  724.03   21.24
  -5  -7   5  639.27   20.93
  -5  -7   5  638.23   21.06
  -4  -7   5   10.43    0.95
   4   7  -5    9.40    0.97
  -4  -7   5    9.91    0.80
   4  -7  -5   10.62    0.85
   4   7  -5    9.18    0.80
   3  -7  -5  111.56    3.86
   3   7  -5  102.76    3.81
  -3  -7   5  108.86    4.05
   3   7  -5  107.36    3.96
  -3  -7   5  105.80    3.76
  -3  -7   5  111.50    3.96
   3  -7  -5  101.25    3.93
   2  -7  -5    9.13    0.70
   2   7  -5    7.49    0.66
   2   7  -5    9.78    0.81
  -2  -7   5    8.39    0.87
  -2  -7   5    7.86    0.65
  -2  -7   5    8.42    0.80
   2  -7  -5    8.14    0.76
  -1  -7   5   46.68    2.67
   1  -7  -5   45.63    1.85
   1   7  -5   43.11    1.82
   1   7  -5   45.29    1.93
  -1  -7   5   44.62    2.12
   1  -7  -5   46.18    1.99
  -1  -7   5   42.60    1.77
  -1  -7   5   45.27    1.96
   1  -7  -5   43.96    1.85
   0  -7  -5  228.70    7.40
   0   7  -5  229.02    7.39
   0  -7   5  213.84    8.33
   0   7  -5  222.97    7.41
   0  -7  -5  223.81    7.23
   0  -7   5  234.91    7.47
   0  -7   5  228.65    7.33
   0  -7  -5  235.42    7.43
  -1  -7  -5   52.02    2.15
  -1   7  -5   53.67    2.15
   1  -7   5   47.96    2.82
   1  -7   5   53.95    2.17
  -1   7  -5   55.55    2.15
  -1  -7  -5   56.24    2.06
  -1   7  -5   52.27    2.31
  -1  -7  -5   54.24    2.24
   1  -7   5   53.17    2.08
  -2   7  -5  338.60   10.84
  -2  -7  -5  340.29   10.83
  -2  -7  -5  349.24   10.97
  -2   7  -5  359.60   10.97
  -2  -7  -5  347.56   11.07
  -2   7  -5  329.59   11.11
   2  -7   5  343.22   10.85
   2  -7   5  335.41   10.86
  -3  -7  -5    7.69    0.85
  -3  -7  -5    7.87    0.69
  -3  -7  -5    6.99    0.72
  -3   7  -5    7.44    0.62
  -3   7  -5    8.64    0.76
  -3   7  -5    7.36    0.87
   3  -7   5    7.05    0.70
  -4   7  -5   21.51    1.28
  -4  -7  -5   21.00    1.27
  -4  -7  -5   22.46    1.26
  -4   7  -5   20.62    1.09
  -4   7  -5   22.02    1.38
   4  -7   5   20.95    1.25
   5   7   5    8.82    0.81
   5  -7   5    7.59    0.77
  -5  -7  -5    8.97    0.86
  -5  -7  -5   10.06    1.09
  -5  -7  -5    7.92    0.97
  -5   7  -5    9.24    0.91
  -6  -7  -5   41.94    1.95
  -6  -7  -5   40.86    2.06
   6  -7   5   36.87    1.82
   6   7   5   35.52    1.80
  -6  -7  -5   38.36    2.09
  -6   7  -5   39.30    1.92
  -7  -7  -5    2.75    0.77
  -7  -7  -5    3.92    0.71
   7   7   5    2.14    0.54
   7  -7   5    3.79    0.58
  -8  -7  -5   61.98    2.51
  -8   7  -5   58.65    2.31
   8   7   5   50.40    2.17
   8  -7   5   52.41    2.20
  -8  -7  -5   58.04    2.28
  -9  -7  -5   99.33    3.58
  -9   7  -5   94.18    3.50
   9   8  -5   12.00    0.82
  -9   8   5   12.49    0.79
  -8  -8   5    6.04    0.61
  -7   8   5    2.64    0.75
  -7  -8   5    1.75    0.46
  -7  -8   5    2.86    0.60
   7  -8  -5    1.33    0.44
   7   8  -5    1.72    0.67
   6   8  -5  320.48   10.08
   6  -8  -5  295.49    9.79
  -6   8   5  307.66   10.00
  -6  -8   5  323.37    9.96
  -5  -8   5    3.97    0.69
  -5  -8   5    2.66    0.55
   5  -8  -5    4.09    0.58
   5   8  -5    3.35    0.82
  -5  -8   5    2.68    0.72
   4  -8  -5    0.51    0.37
   4   8  -5    0.80    0.59
  -4  -8   5    1.57    0.48
  -4  -8   5    0.82    0.62
  -3  -8   5   -0.20    0.65
  -3  -8   5    0.25    0.41
   3  -8  -5    0.38    0.54
  -3  -8   5    0.57    0.59
   3  -8  -5    0.44    0.32
   3   8  -5    0.13    0.51
   2   8  -5   15.42    1.07
   2  -8  -5   15.20    0.92
  -2  -8   5   17.11    1.23
  -2  -8   5   15.03    0.94
  -2  -8   5   16.72    1.13
   2  -8  -5   15.29    1.04
   1   8  -5   10.87    0.85
   1  -8  -5   10.24    0.72
  -1  -8   5   11.79    1.06
  -1  -8   5   11.78    0.79
  -1  -8   5   11.11    0.92
   1  -8  -5   10.60    0.79
   0  -8  -5    0.20    0.32
   0  -8   5    0.06    0.42
   0   8  -5    0.15    0.36
   0  -8  -5    0.25    0.30
   0  -8   5    0.02    0.35
  -1   8  -5    9.16    0.72
  -1  -8  -5    9.16    0.63
  -1  -8  -5    8.71    0.69
   1  -8   5    8.46    0.70
  -1  -8  -5    8.38    0.77
  -2   8  -5    2.49    0.44
  -2  -8  -5    1.77    0.42
  -2  -8  -5    3.10    0.59
  -2  -8  -5    2.56    0.43
   2  -8   5    2.34    0.49
  -2   8  -5    2.87    0.69
   2  -8   5    2.34    0.50
  -3  -8  -5   38.37    1.95
  -3   8  -5   38.22    1.97
   3  -8   5   39.99    1.80
  -3  -8  -5   40.23    1.73
  -3  -8  -5   35.11    1.70
   4  -8   5    9.74    0.89
  -4   8  -5    8.98    0.96
  -4  -8  -5    8.92    0.81
  -5  -8  -5   10.40    0.93
  -5  -8  -5   11.83    1.16
   5  -8   5   10.61    0.84
  -5  -8  -5   12.72    1.20
  -5   8  -5   11.54    1.01
  -6  -8  -5    1.12    0.76
  -6   8  -5    2.18    0.57
  -6  -8  -5    1.35    0.70
   6  -8   5    1.63    0.44
  -6  -8  -5    1.46    0.56
  -7  -8  -5   87.64    3.42
  -7  -8  -5   89.50    3.24
  -7  -8  -5   87.72    3.33
  -8  -8  -5    3.86    0.55
  -8   8  -5    4.09    0.57
  -8  -8  -5    3.64    0.68
  -9   8  -5   14.04    0.80
  -9  -8  -5   14.96    0.87
  -8   9   5   46.96    1.83
   8   9  -5   41.77    1.83
  -7   9   5   99.19    3.56
   7   9  -5   94.56    3.60
  -7  -9   5   93.94    3.41
   6   9  -5   33.18    1.79
  -6  -9   5   29.88    1.57
  -6  -9   5   33.74    1.70
  -5  -9   5    1.36    0.60
   5   9  -5    1.02    0.68
  -5  -9   5    0.95    0.49
  -5  -9   5    1.39    0.63
  -4  -9   5    4.13    0.80
   4   9  -5    5.48    0.81
  -4  -9   5    4.75    0.64
   4  -9  -5    2.84    0.77
  -3  -9   5    0.35    0.64
   3   9  -5    0.84    0.56
  -3  -9   5    0.12    0.40
   3  -9  -5    0.90    0.56
  -3  -9   5    0.36    0.63
  -2  -9   5   23.83    1.49
   2   9  -5   20.12    1.25
  -2  -9   5   20.06    1.17
  -2  -9   5   18.72    1.29
   2  -9  -5   21.07    1.25
   1   9  -5    9.76    0.80
  -1  -9   5    8.80    0.75
  -1  -9   5    9.77    0.90
   1  -9  -5    7.56    0.70
  -1  -9   5    8.50    1.05
   0   9  -5   56.96    2.34
   0  -9   5   60.41    2.37
   0  -9   5   60.89    2.48
   0  -9  -5   57.68    2.36
  -1   9  -5  100.37    3.53
   1  -9   5   94.37    3.55
   1  -9   5   97.82    3.65
  -1  -9  -5  102.31    3.71
  -2  -9  -5   15.64    0.92
   2  -9   5   16.77    1.08
  -2  -9  -5   15.49    1.14
  -2   9  -5   17.90    1.30
   2  -9   5   15.54    1.04
  -3   9  -5   69.52    2.97
   3  -9   5   68.94    2.77
  -3  -9  -5   68.41    2.95
  -3  -9  -5   68.80    2.65
  -4  -9  -5  238.64    8.42
  -4  -9  -5  248.08    8.45
  -4   9  -5  253.18    8.37
   4  -9   5  246.76    8.23
  -4  -9  -5  246.17    8.10
  -5   9  -5   73.02    2.99
  -5  -9  -5   71.15    2.86
  -5  -9  -5   72.39    3.14
  -6  -9  -5    0.58    0.50
  -6  -9  -5    0.74    0.71
  -6  -9  -5    1.42    0.70
  -7  -9  -5   21.32    1.43
  -7  -9  -5   21.00    1.24
  -7  -9  -5   22.14    1.36
  -8  -9  -5   21.01    1.16
  -8  -9  -5   20.71    1.12
  -8   9  -5   19.61    1.10
  -8  -9  -5   23.51    1.29
  -8  10   5    3.99    0.55
   8  10  -5    3.13    0.54
  -7  10   5    1.52    0.59
  -7 -10   5    1.08    0.38
  -7 -10   5    1.24    0.44
   7  10  -5    1.54    0.58
   6  10  -5   44.80    2.11
  -6 -10   5   43.99    1.96
  -5 -10   5    5.54    0.83
   5  10  -5    6.19    0.87
  -5 -10   5    5.63    0.72
  -5 -10   5    6.77    0.83
  -4 -10   5   19.25    1.39
   4  10  -5   17.57    1.30
  -4 -10   5   17.66    1.18
   4 -10  -5   18.04    1.31
  -3 -10   5   63.93    2.83
   3  10  -5   60.40    2.60
  -3 -10   5   57.36    2.47
   3 -10  -5   59.04    2.60
  -2 -10   5   15.95    1.37
   2  10  -5   13.21    1.04
  -2 -10   5   15.01    1.03
  -2 -10   5   14.84    1.16
   2 -10  -5   15.54    1.09
   1  10  -5   64.13    2.54
  -1 -10   5   61.98    2.53
  -1 -10   5   63.14    2.65
   1 -10  -5   58.96    2.47
  -1 -10   5   64.02    2.91
   0  10  -5   20.10    1.13
   0 -10  -5   18.30    1.14
   0 -10   5   20.69    1.29
   0 -10   5   19.69    1.18
  -1 -10  -5  296.60    9.67
   1 -10   5  290.27    9.58
   1 -10   5  302.07    9.70
  -2 -10  -5   43.53    2.16
  -2 -10  -5   42.02    2.03
  -2  10  -5   40.62    2.14
   2 -10   5   41.44    1.92
   2 -10   5   41.60    1.94
  -3 -10  -5  611.12   19.05
  -3  10  -5  620.83   19.10
   3 -10   5  617.44   18.89
  -3 -10  -5  573.82   18.64
  -4 -10  -5   16.47    1.31
  -4  10  -5   16.92    1.25
   4 -10   5   16.48    1.19
  -4 -10  -5   15.24    1.02
  -4 -10  -5   17.11    1.38
  -5 -10  -5    7.86    0.76
  -5  10  -5    7.40    0.80
  -5 -10  -5    7.10    0.98
  -6 -10  -5    0.15    0.44
  -6 -10  -5    0.29    0.65
  -6 -10  -5    0.61    0.65
  -7 -10  -5    7.27    0.70
  -7 -10  -5    6.33    0.84
  -7 -10  -5    6.40    0.75
  -8 -10  -5    3.04    0.46
  -8 -10  -5    3.55    0.48
  -8  10  -5    2.92    0.45
  -8 -10  -5    3.77    0.56
   8  11  -5   15.66    0.90
  -8  11   5   17.46    0.91
   7  11  -5    0.53    0.46
  -7 -11   5    0.52    0.32
  -7 -11   5    0.14    0.33
  -7  11   5    0.75    0.52
   6  11  -5   -0.44    0.61
  -6 -11   5    0.08    0.40
  -6 -11   5    0.06    0.43
  -6  11   5    0.16    0.60
   5  11  -5    0.80    0.58
  -5 -11   5    0.19    0.47
  -5 -11   5    0.37    0.53
  -5 -11   5   -0.04    0.59
   4  11  -5    4.33    0.75
  -4 -11   5    4.69    0.70
   4 -11  -5    3.92    0.76
  -4 -11   5    4.80    0.79
  -4 -11   5    4.79    0.88
   3  11  -5    5.57    0.76
  -3 -11   5    5.84    0.73
   3 -11  -5    5.46    0.81
  -3 -11   5    5.53    0.97
   2  11  -5    4.13    0.65
  -2 -11   5    5.23    0.96
  -2 -11   5    4.73    0.68
   2 -11  -5    3.85    0.66
  -2 -11   5    4.61    0.79
   1  11  -5   29.08    1.47
   1 -11  -5   29.79    1.51
  -1 -11   5   27.41    1.49
  -1 -11   5   30.86    1.68
   1 -11  -5   25.89    1.41
  -1 -11   5   29.09    1.86
   0 -11   5   -0.03    0.48
   0 -11  -5   -0.29    0.53
   0 -11   5    0.11    0.62
  -1 -11  -5  163.88    5.82
  -1 -11  -5  159.85    5.69
   1 -11   5  166.43    5.67
   1 -11   5  163.33    5.73
  -2 -11  -5  398.85   13.44
  -2  11  -5  431.44   13.66
   2 -11   5  426.31   13.39
  -2 -11  -5  421.07   13.59
  -3 -11  -5   28.14    1.64
  -3  11  -5   27.19    1.66
   3 -11   5   26.60    1.53
  -4 -11  -5    1.59    0.69
  -4 -11  -5    0.63    0.76
   4 -11   5    2.49    0.67
  -4  11  -5    1.82    0.62
  -4 -11  -5    1.02    0.40
  -5  11  -5   79.57    3.11
  -5 -11  -5   75.08    2.98
  -6 -11  -5    0.26    0.40
  -6 -11  -5    0.51    0.64
  -6 -11  -5   -0.11    0.60
  -7 -11  -5    3.92    0.51
  -7 -11  -5    5.49    0.69
  -7 -11  -5    5.86    0.71
  -7  12   5    4.82    0.58
   7  12  -5    3.75    0.53
  -6  12   5    2.58    0.61
   6  12  -5    1.53    0.53
   6  12  -5    1.53    0.49
  -6 -12   5    0.78    0.40
  -6 -12   5    1.28    0.44
  -5 -12   5   26.66    1.42
  -5 -12   5   26.94    1.57
   5  12  -5   27.60    1.49
  -4 -12   5   32.91    1.72
  -4 -12   5   39.58    2.04
   4  12  -5   36.91    1.81
  -3 -12   5    0.59    0.74
   3  12  -5    0.43    0.48
  -3 -12   5    0.30    0.49
   3 -12  -5    0.18    0.54
  -2 -12   5  161.16    5.95
  -2 -12   5  165.61    5.63
  -2 -12   5  167.36    5.74
   2 -12  -5  147.77    5.53
   2  12  -5  162.81    5.54
  -1 -12   5    0.34    0.55
   1 -12  -5    0.03    0.40
   1 -12  -5    0.06    0.36
  -1 -12   5   -0.08    0.68
   0 -12  -5   49.87    2.33
   0 -12   5   55.70    2.37
   0 -12   5   55.84    2.44
   1 -12   5    0.27    0.52
  -1  12  -5    0.23    0.69
  -1 -12  -5    0.13    0.42
  -1 -12  -5   -0.04    0.57
   1 -12   5    0.11    0.62
  -2 -12  -5   46.13    2.17
  -2  12  -5   49.03    2.37
   2 -12   5   45.02    2.11
  -2 -12  -5   45.37    2.26
  -3 -12  -5    8.89    0.99
   3 -12   5   10.60    0.98
  -3 -12  -5   11.64    1.13
  -4 -12  -5    7.20    0.93
  -4  12  -5    8.12    0.84
   4 -12   5    8.44    0.92
  -5 -12  -5   16.66    1.25
  -5 -12  -5   16.95    1.25
  -6 -12  -5   58.19    2.24
  -6 -12  -5   40.21    1.78
  -7 -12  -5   51.95    2.05
  -7 -12  -5   44.92    2.04
  -6  13   5    0.77    0.46
   6  13  -5    0.24    0.37
  -6 -13   5    1.03    0.34
  -6 -13   5    0.27    0.32
   6  13  -5    0.64    0.38
   5  13  -5   11.78    0.88
  -5 -13   5   12.76    0.88
  -5 -13   5   11.77    0.87
  -4 -13   5   13.68    1.17
   4  13  -5   11.81    0.92
  -4 -13   5   13.05    0.96
  -4 -13   5   13.53    1.00
  -3 -13   5   22.13    1.60
   3  13  -5   23.48    1.28
  -3 -13   5   23.81    1.36
   3 -13  -5   23.08    1.36
  -2 -13   5    0.10    0.49
   2 -13  -5    0.25    0.45
  -2 -13   5    0.20    0.80
  -1 -13   5   55.30    2.46
  -1 -13   5   53.06    2.35
   0 -13   5    0.75    0.54
   0  13  -5    0.88    0.77
   0 -13  -5    1.07    0.48
   0 -13   5    0.85    0.63
  -1 -13  -5   22.71    1.38
  -1  13  -5   23.28    1.57
   1 -13   5   21.19    1.30
  -1 -13  -5   18.38    1.16
  -2 -13  -5    0.87    0.49
  -2 -13  -5    0.44    0.56
  -2  13  -5   -0.09    0.64
   2 -13   5    0.49    0.54
  -3  13  -5   24.90    1.51
   3 -13   5   28.09    1.52
  -3 -13  -5   25.51    1.58
  -3 -13  -5   24.74    1.49
   4 -13   5    0.38    0.56
  -4  13  -5    0.51    0.45
   4 -13   5    0.74    0.44
  -4 -13  -5    0.74    0.56
  -5 -13  -5    0.18    0.55
  -5 -13  -5    0.79    0.58
  -6 -13  -5    5.32    0.68
  -6  14   5   13.88    0.81
   5  14  -5    0.48    0.31
  -5 -14   5    0.30    0.34
  -5 -14   5    0.74    0.38
  -5  14   5    0.90    0.44
  -4 -14   5    0.08    0.41
  -4 -14   5   -0.25    0.44
  -3 -14   5   34.72    1.66
  -3 -14   5   32.12    1.65
  -2 -14   5   58.90    2.47
  -1 -14   5    0.03    0.50
  -1 -14   5    0.49    0.62
   0 -14   5    9.37    0.87
   0 -14  -5    7.97    0.73
  -1 -14  -5    0.41    0.49
   1 -14   5   -0.23    0.54
  -1  14  -5    0.75    0.71
  -2 -14  -5   20.62    1.31
  -2 -14  -5   19.36    1.18
   2 -14   5   21.03    1.29
  -2  14  -5   20.72    1.40
  -3 -14  -5    2.37    0.66
  -3 -14  -5    3.00    0.59
   3 -14   5    2.41    0.59
  -3  14  -5    2.40    0.61
  -4 -14  -5    6.05    0.79
  -4 -14  -5    6.08    0.74
   4 -14   5    5.78    0.61
  -5 -14  -5   16.35    1.06
  -6 -14  -5    8.92    0.73
  -6 -14  -5    8.76    0.69
   5  15  -5    1.15    0.40
  -4  15   5   24.01    1.15
  -4 -15   5   23.63    1.19
  -3 -15   5    4.21    0.58
  -2 -15   5   25.92    1.37
  -1 -15   5   23.10    1.31
   0  15  -5   32.88    1.81
   0 -15   5   31.31    1.59
  -1 -15  -5    0.90    0.43
   1 -15   5    1.56    0.54
  -1  15  -5    1.10    0.62
  -2 -15  -5    1.05    0.47
  -2 -15  -5    1.24    0.38
   2 -15   5    1.63    0.54
  -2  15  -5    1.14    0.54
  -3 -15  -5   10.92    0.85
  -3  15  -5   11.78    0.87
   3 -15   5   15.41    1.00
  -3 -15  -5   14.86    1.00
   3 -15   5   13.08    0.91
  -4 -15  -5    4.67    0.62
  -4 -15  -5    4.23    0.56
   4 -15   5    4.03    0.49
  -5 -15  -5    0.17    0.37
  -5 -15  -5    0.11    0.33
   4  16  -5    0.76    0.41
  -3 -16   5    5.68    0.54
   2  16  -5   11.77    0.98
  -2 -16   5   11.96    0.81
  -1 -16   5    6.15    0.65
   1  16  -5    7.27    0.86
   0 -16   5    1.88    0.50
   0  16  -5    2.11    0.61
   1 -16   5    1.40    0.46
  -1  16  -5    0.84    0.52
  -2  16  -5    8.54    0.74
   2 -16   5    9.89    0.77
  -3 -16  -5   10.15    0.77
   3 -16   5   11.31    0.76
   3 -16   5   12.50    0.84
  -4 -16  -5    0.91    0.36
  -2 -17   5    2.98    0.40
   2  17  -5    2.98    0.54
  -1 -17   5    4.97    0.51
   1  17  -5    5.11    0.62
   0  17  -5    4.77    0.62
   0 -17   5    6.61    0.59
   1 -17   5    8.81    0.66
  -1  17  -5    6.27    0.63
   2 -17   5    0.08    0.32
   2 -17   5    0.06    0.30
   9   0  -6    3.54    0.63
  -9   0   6    3.30    0.54
   8   0  -6   70.03    3.04
  -8   0   6   76.49    2.95
   7   0  -6   69.83    2.96
   7   0  -6   62.76    2.61
   6   0  -6    2.86    0.77
   6   0  -6    3.58    0.62
  -6   0   6    4.64    0.86
   5   0  -6   18.76    1.35
   5   0  -6   19.83    1.21
  -5   0   6   20.39    1.31
   4   0  -6   57.37    2.46
   4   0  -6   56.73    2.31
  -4   0   6   50.83    2.29
   3   0  -6   38.44    1.85
   3   0  -6   39.97    1.77
  -3   0   6   38.62    1.76
   2   0  -6  191.56    6.19
   2   0  -6  186.50    6.26
   2   0  -6  182.78    6.09
  -2   0   6  182.77    6.12
   1   0  -6 1010.89   30.83
   1   0  -6 1017.21   30.93
   1   0  -6  994.83   30.84
   0   0  -6   21.81    1.18
   0   0  -6   19.48    1.14
  -1   0  -6  287.68    9.24
  -1   0  -6  281.54    9.23
  -1   0  -6  284.60    9.30
  -2   0  -6   55.10    2.34
  -2   0  -6   54.40    2.22
  -2   0  -6   55.82    2.41
  -3   0  -6  201.05    6.77
  -3   0  -6  196.42    6.95
  -3   0  -6  209.58    7.00
  -3   0  -6  209.43    6.95
  -4   0  -6   53.44    2.33
  -4   0  -6   55.75    2.55
  -4   0  -6   55.62    2.53
  -4   0  -6   57.27    2.44
  -5   0  -6   65.33    2.74
  -5   0  -6   65.70    3.00
  -5   0  -6   72.61    3.03
  -6   0  -6    1.91    0.63
  -6   0  -6    0.82    0.36
  -6   0  -6    0.94    0.70
  -6   0  -6    1.02    0.77
   7   0   6   47.85    2.27
  -7   0  -6   46.24    2.08
  -7   0  -6   49.34    2.28
  -8   0  -6    1.44    0.53
   8   0   6    0.04    0.57
  -8   0  -6    0.97    0.47
   9   0   6   13.02    0.95
  -9   0  -6   11.40    0.77
  -9   1   6   31.98    1.47
  -9  -1   6   30.34    1.43
   9   1  -6   29.92    1.55
   8  -1  -6   97.73    3.74
   8   1  -6   99.82    3.76
  -8  -1   6  101.52    3.58
   7  -1  -6   -0.47    0.64
   7   1  -6    0.46    0.62
   7   1  -6    0.36    0.46
   7  -1  -6    0.26    0.34
   6  -1  -6  116.27    4.39
   6   1  -6  114.80    4.38
  -6   1   6  107.11    4.19
   6   1  -6  115.14    4.19
   6  -1  -6  110.18    4.04
   5  -1  -6    3.21    0.79
   5   1  -6    4.65    0.78
  -5  -1   6    3.85    0.77
  -5   1   6    4.33    0.75
   5  -1  -6    4.32    0.60
   5   1  -6    3.81    0.66
   4  -1  -6    2.16    0.63
   4   1  -6    1.70    0.58
  -4  -1   6    0.95    0.55
  -4   1   6    1.53    0.56
   4   1  -6    1.40    0.52
   4  -1  -6    1.52    0.45
   3  -1  -6    0.67    0.52
   3   1  -6    1.24    0.55
  -3  -1   6    1.34    0.51
  -3   1   6    0.40    0.47
   3   1  -6    0.95    0.47
   3  -1  -6    1.36    0.44
  -2   1   6  348.62   10.96
   2   1  -6  349.05   11.04
   2  -1  -6  347.48   10.99
   2   1  -6  353.55   11.13
   2   1  -6  336.17   10.97
  -1   1   6    5.55    0.54
  -1  -1   6    5.68    0.55
   1  -1  -6    4.47    0.54
   1   1  -6    5.08    0.62
   1   1  -6    5.02    0.58
   1  -1  -6    5.61    0.56
   0  -1  -6   18.88    1.05
   0   1  -6   20.65    1.15
   0  -1   6   18.47    0.94
   0   1  -6   20.20    1.15
   0  -1  -6   19.55    1.11
  -1  -1  -6  248.66    7.94
  -1   1  -6  237.17    7.71
  -1   1  -6  230.69    7.80
  -1   1  -6  235.98    7.84
  -1  -1  -6  237.60    7.81
  -2   1  -6   26.54    1.50
  -2  -1  -6   27.89    1.53
  -2   1  -6   27.99    1.38
  -2   1  -6   26.92    1.46
  -2  -1  -6   28.45    1.49
  -3   1  -6   26.18    1.45
  -3  -1  -6   25.95    1.48
  -3   1  -6   26.09    1.34
  -3  -1  -6   25.31    1.35
  -3   1  -6   24.72    1.48
  -3   1  -6   25.74    1.51
  -4   1  -6   30.05    1.62
  -4  -1  -6   30.07    1.66
  -4  -1  -6   30.12    1.56
  -4   1  -6   31.14    1.57
  -4  -1  -6   31.47    1.77
  -4   1  -6   30.66    1.75
  -4  -1  -6   33.01    1.80
  -4   1  -6   32.14    1.77
  -5   1  -6   32.71    1.92
  -5   1  -6   34.07    1.71
  -5  -1  -6   32.05    1.91
  -5  -1  -6   35.25    1.76
  -5   1  -6   34.67    1.93
  -5  -1  -6   36.77    1.97
  -5   1  -6   35.11    1.73
  -6  -1  -6   13.41    1.07
  -6  -1  -6   14.29    1.29
  -6   1  -6   13.41    1.04
  -6   1  -6   13.00    1.27
  -6   1  -6   13.24    0.88
  -6   1  -6   14.17    1.22
  -6  -1  -6   13.69    1.22
  -7   1  -6    0.84    0.55
  -7  -1  -6    0.07    0.54
  -7   1  -6    0.33    0.60
  -7  -1  -6    0.34    0.62
  -7   1  -6    0.44    0.38
   7   1   6    1.23    0.71
  -8   1  -6    5.52    0.62
  -8  -1  -6    5.08    0.66
  -8   1  -6    4.62    0.68
  -8  -1  -6    4.77    0.71
  -8   1  -6    3.58    0.50
   8   1   6    4.47    0.78
   9   1   6    9.98    0.83
  -9  -1  -6    9.30    0.71
  -9   1  -6    7.98    0.62
   9   2  -6    0.75    0.47
  -9   2   6    0.84    0.42
  -9  -2   6    0.81    0.40
   8   2  -6   22.85    1.30
  -8  -2   6   25.36    1.39
   8   2  -6   24.96    1.50
  -7   2   6  102.90    3.87
   7   2  -6  104.20    3.85
   7   2  -6   95.38    3.93
  -6   2   6   23.83    1.49
   6  -2  -6   21.43    1.20
   6   2  -6   25.38    1.47
   6   2  -6   23.32    1.54
  -5   2   6   32.50    1.75
   5   2  -6   36.42    1.89
   5  -2  -6   34.88    1.61
   5   2  -6   34.11    1.76
   4  -2  -6    6.18    0.68
  -4   2   6    5.04    0.75
   4   2  -6    6.02    0.78
   4  -2  -6    5.73    0.61
   4   2  -6    4.97    0.70
   3  -2  -6   39.22    1.66
   3   2  -6   38.08    1.76
  -3   2   6   35.75    1.69
   3  -2  -6   39.34    1.81
   3   2  -6   36.69    1.79
   3   2  -6   34.05    1.61
   2  -2  -6    2.79    0.46
   2   2  -6    2.01    0.54
  -2   2   6    2.57    0.48
   2  -2  -6    3.25    0.58
  -2  -2   6    2.38    0.50
   2   2  -6    2.68    0.49
   1   2  -6   11.68    0.88
   1  -2  -6   12.62    0.82
  -1   2   6   11.22    0.73
   1  -2  -6   12.71    0.98
  -1  -2   6   13.17    0.81
   1   2  -6   11.88    0.87
   1  -2  -6   11.61    0.78
   0   2  -6   81.36    3.10
   0   2  -6   82.67    3.04
   0  -2  -6   86.22    3.02
   0  -2   6   79.57    2.91
   0   2  -6   80.39    3.12
   0  -2  -6   84.32    3.07
  -1  -2  -6   17.93    1.03
  -1   2  -6   18.82    1.07
  -1  -2  -6   19.66    1.22
  -1   2  -6   19.44    1.15
  -1   2  -6   17.78    1.16
  -1  -2  -6   17.25    1.11
  -2   2  -6    0.26    0.49
  -2  -2  -6    0.66    0.54
  -2  -2  -6    0.39    0.51
  -2   2  -6    0.32    0.51
  -2   2  -6   -0.03    0.40
  -3   2  -6   65.19    2.63
  -3   2  -6   67.83    2.83
  -3   2  -6   67.92    2.85
  -3  -2  -6   68.23    2.83
  -3   2  -6   69.57    2.77
  -4  -2  -6   98.16    3.61
  -4   2  -6   96.69    3.57
  -4  -2  -6   94.92    3.76
  -4   2  -6   96.25    3.65
  -4   2  -6   88.30    3.74
  -4  -2  -6   99.11    3.84
  -4   2  -6   99.68    3.80
  -5   2  -6    1.42    0.47
  -5   2  -6    1.39    0.53
  -5  -2  -6    2.03    0.63
  -5  -2  -6    1.20    0.74
  -5   2  -6    1.53    0.40
  -5   2  -6    1.28    0.67
  -6   2  -6    4.29    0.56
  -6   2  -6    4.34    0.67
  -6  -2  -6    4.02    0.77
  -6   2  -6    4.29    0.85
  -6  -2  -6    4.71    0.89
  -7   2  -6    3.72    0.62
  -7  -2  -6    2.94    0.68
  -7   2  -6    4.43    0.76
  -7  -2  -6    3.42    0.76
  -7   2  -6    2.29    0.48
   7   2   6    3.66    0.79
   8   2   6   39.89    1.92
  -8   2  -6   37.42    1.67
  -8  -2  -6   40.63    1.81
  -8   2  -6   33.71    1.59
  -8  -2  -6   41.78    1.92
  -8   2  -6   34.85    1.75
  -9  -2  -6    0.02    0.36
   9   2   6   -0.22    0.42
   9  -2   6   -0.03    0.41
  -9  -2  -6   -0.28    0.32
   9  -3  -6   50.51    2.02
   9   3  -6   52.22    2.02
  -9  -3   6   47.30    1.86
   8   3  -6    2.86    0.57
  -8  -3   6    3.79    0.64
   8  -3  -6    3.41    0.69
   8   3  -6    2.78    0.64
  -7   3   6   34.44    1.80
   7   3  -6   32.13    1.75
   7  -3  -6   32.99    1.84
   7   3  -6   33.60    1.83
  -6   3   6   25.70    1.57
   6   3  -6   25.24    1.53
   6  -3  -6   26.45    1.61
   6   3  -6   25.46    1.59
  -5   3   6   57.79    2.53
  -5  -3   6   59.75    2.57
   5  -3  -6   62.19    2.67
   5   3  -6   60.60    2.65
   5  -3  -6   56.75    2.27
   5   3  -6   59.83    2.58
   4  -3  -6  242.07    7.98
  -4   3   6  230.57    7.97
  -4  -3   6  244.29    8.06
   4  -3  -6  235.98    8.09
   4   3  -6  235.48    8.10
   4  -3  -6  254.03    7.85
   4   3  -6  245.64    8.07
   3  -3  -6   59.05    2.22
  -3   3   6   53.18    2.28
  -3  -3   6   54.69    2.34
   3  -3  -6   58.86    2.40
   3  -3  -6   57.33    2.41
   3   3  -6   55.21    2.39
   3   3  -6   53.41    2.27
   2  -3  -6    0.63    0.42
   2  -3  -6    0.11    0.32
   2   3  -6    0.39    0.44
  -2   3   6    0.50    0.42
   2  -3  -6    0.39    0.44
  -2  -3   6    0.56    0.42
   2   3  -6    0.26    0.40
   1  -3  -6  117.81    4.30
   1   3  -6  124.56    4.34
   1   3  -6  123.98    4.28
   1  -3  -6  124.86    4.19
  -1   3   6  119.63    4.11
   1  -3  -6  123.97    4.42
  -1  -3   6  125.24    4.22
   1  -3  -6  119.82    4.18
   1   3  -6  119.25    4.35
   0   3  -6  207.60    6.92
   0  -3  -6  204.05    6.92
   0   3  -6  209.74    6.86
   0  -3  -6  208.68    6.79
   0  -3  -6  206.12    7.02
   0  -3   6  217.36    6.77
   0  -3  -6  205.89    6.86
   0   3  -6  203.25    6.96
  -1  -3  -6    2.08    0.45
  -1  -3  -6    2.14    0.62
  -1  -3  -6    2.38    0.50
   1  -3   6    2.65    0.39
  -1  -3  -6    2.35    0.54
  -1   3  -6    2.24    0.54
  -1   3  -6    2.63    0.50
  -2   3  -6   14.38    0.93
  -2  -3  -6   13.38    0.90
  -2  -3  -6   12.73    0.98
  -2   3  -6   14.05    1.03
  -2  -3  -6   13.75    1.02
  -2   3  -6   13.56    1.05
  -2  -3  -6   14.11    1.08
  -3   3  -6  166.76    5.64
  -3  -3  -6  172.81    5.92
  -3   3  -6  164.45    5.77
  -3  -3  -6  162.83    5.84
  -3   3  -6  162.67    5.83
  -3   3  -6  168.81    5.89
  -4   3  -6    3.99    0.64
  -4   3  -6    3.91    0.61
  -4   3  -6    5.58    0.82
  -4  -3  -6    3.48    0.75
  -4   3  -6    4.56    0.82
  -4  -3  -6    4.59    0.84
  -5   3  -6  101.19    4.06
  -5  -3  -6  106.12    4.11
  -5   3  -6  103.74    3.80
  -5  -3  -6  105.45    3.89
  -5  -3  -6  109.73    4.17
  -5   3  -6  105.58    4.06
  -5   3  -6   96.01    3.64
  -6   3  -6   29.49    1.53
  -6  -3  -6   29.95    1.66
  -6   3  -6   27.93    1.43
  -6   3  -6   29.73    1.74
  -6  -3  -6   30.39    1.83
   7   3   6   40.43    1.96
   7  -3   6   35.11    1.88
  -7  -3  -6   30.82    1.64
  -7  -3  -6   37.46    1.84
  -7   3  -6   35.25    1.67
  -7   3  -6   33.18    1.61
  -7   3  -6   37.16    1.88
  -7  -3  -6   37.46    1.97
   8   3   6   13.07    1.03
   8  -3   6   12.10    1.00
  -8   3  -6   11.49    0.78
  -8  -3  -6   13.98    0.99
  -8   3  -6    9.98    0.78
  -8  -3  -6   14.50    1.07
  -8   3  -6   10.10    0.84
  -9  -3  -6   11.64    0.78
   9   3   6   10.75    0.83
   9  -3   6   10.05    0.80
  -9  -3  -6    8.97    0.73
   9  -4  -6   41.01    1.73
   9   4  -6   39.90    1.69
  -9  -4   6   37.40    1.58
   8   4  -6   78.59    3.00
  -8  -4   6   80.24    2.95
   8  -4  -6   71.51    3.03
   8   4  -6   72.69    3.02
   7   4  -6   97.79    3.79
  -7  -4   6  100.27    3.77
   7  -4  -6   97.99    3.85
   7   4  -6   96.87    3.84
  -7   4   6  102.40    3.83
   6   4  -6   45.23    2.13
   6  -4  -6   43.15    2.15
   6   4  -6   43.36    2.15
  -6   4   6   41.90    2.10
   5   4  -6   95.15    3.68
  -5   4   6   95.22    3.64
  -5  -4   6   95.10    3.67
   5   4  -6   95.31    3.71
   5  -4  -6   90.75    3.68
  -4  -4   6   11.15    0.99
  -4   4   6   10.73    0.94
   4  -4  -6    8.83    0.76
   4  -4  -6   10.40    0.97
   4   4  -6   11.56    0.97
   3  -4  -6   31.51    1.61
   3   4  -6   31.83    1.63
   3  -4  -6   30.47    1.38
   3   4  -6   30.55    1.62
  -3   4   6   30.85    1.53
   3  -4  -6   34.56    1.62
  -3  -4   6   33.07    1.63
   3   4  -6   29.15    1.54
   2   4  -6    6.64    0.73
   2  -4  -6    6.16    0.56
   2  -4  -6    5.66    0.67
   2   4  -6    5.91    0.68
  -2   4   6    5.89    0.62
   2  -4  -6    5.96    0.69
  -2  -4   6    6.01    0.67
   2   4  -6    5.00    0.66
   1  -4  -6    0.13    0.30
   1   4  -6    0.38    0.41
   1   4  -6    0.52    0.47
   1  -4  -6    0.63    0.42
   1  -4  -6    0.24    0.28
  -1   4   6    0.32    0.32
   1  -4  -6    0.36    0.47
  -1  -4   6    1.13    0.42
   1   4  -6    0.79    0.48
   0  -4  -6  135.00    4.71
   0   4  -6  134.36    4.71
   0  -4  -6  137.18    4.83
   0  -4   6  132.21    4.57
   0  -4  -6  137.74    4.66
   0   4  -6  134.50    4.81
   0   4  -6  133.88    4.66
   0  -4  -6  133.41    4.56
  -1  -4  -6   18.05    1.12
  -1   4  -6   18.37    1.13
  -1   4  -6   17.73    1.05
  -1  -4  -6   18.16    1.02
   1  -4   6   16.42    0.93
  -1  -4  -6   17.88    1.12
  -2   4  -6   13.00    0.90
  -2  -4  -6   13.74    0.91
  -2  -4  -6   13.55    1.13
  -2  -4  -6   12.76    0.99
  -2   4  -6   12.81    0.99
  -2  -4  -6   13.94    1.03
  -2   4  -6   12.82    1.07
  -3  -4  -6    0.28    0.57
  -3   4  -6    0.83    0.46
  -3   4  -6    0.46    0.44
  -3  -4  -6    0.55    0.45
  -3  -4  -6    0.42    0.54
  -3  -4  -6    0.34    0.52
  -3   4  -6    0.19    0.51
  -3   4  -6    0.04    0.60
  -4   4  -6    4.62    0.63
  -4   4  -6    4.75    0.62
  -4   4  -6    4.77    0.80
  -4  -4  -6    5.42    0.82
  -4   4  -6    5.06    0.79
  -5   4  -6    1.08    0.48
  -5   4  -6    1.29    0.66
  -5  -4  -6    0.68    0.75
  -5  -4  -6    0.95    0.63
  -5   4  -6    0.34    0.63
   6  -4   6  194.35    6.81
  -6  -4  -6  199.00    6.74
  -6   4  -6  199.99    6.59
  -6   4  -6  185.35    6.51
  -6   4  -6  203.17    6.89
  -6  -4  -6  200.00    6.99
   7   4   6   52.84    2.37
   7  -4   6   50.61    2.35
  -7   4  -6   50.78    2.11
  -7  -4  -6   56.47    2.34
  -7  -4  -6   46.20    2.19
  -7   4  -6   49.85    2.13
  -7   4  -6   51.91    2.32
  -7  -4  -6   52.52    2.49
  -8  -4  -6    4.98    0.72
  -8   4  -6    3.19    0.49
   8   4   6    4.36    0.67
   8  -4   6    3.65    0.65
  -8  -4  -6    4.25    0.65
  -9  -4  -6    5.82    0.59
  -9  -4  -6    4.44    0.53
   9  -4   6    3.90    0.52
   9   4   6    4.71    0.54
   9   5  -6    0.12    0.30
   9   5  -6   -0.02    0.29
   9  -5  -6   -0.02    0.31
  -9  -5   6   -0.03    0.28
   8   5  -6    5.82    0.72
  -8  -5   6    6.89    0.70
   8  -5  -6    6.01    0.73
   8   5  -6    5.69    0.70
  -7   5   6    0.83    0.67
   7   5  -6    0.84    0.61
  -7  -5   6    0.44    0.56
   7  -5  -6    1.26    0.58
   7   5  -6    1.64    0.57
  -6   5   6   58.69    2.62
   6   5  -6   61.87    2.68
   6  -5  -6   58.52    2.63
   6   5  -6   60.68    2.64
  -5   5   6  205.63    7.13
  -5  -5   6  202.90    7.15
   5  -5  -6  212.28    7.20
   5   5  -6  219.02    7.22
   4  -5  -6   58.01    2.44
   4   5  -6   55.73    2.43
   4   5  -6   54.94    2.46
  -4   5   6   55.35    2.37
  -4  -5   6   55.21    2.42
   4   5  -6   49.89    2.29
   3   5  -6    1.60    0.59
   3   5  -6    1.68    0.52
   3  -5  -6    1.21    0.49
  -3   5   6    1.14    0.55
   3  -5  -6    1.17    0.44
  -3  -5   6    1.64    0.60
   3   5  -6    1.07    0.47
   2  -5  -6   16.34    1.09
   2   5  -6   19.17    1.15
   2  -5  -6   17.90    0.94
   2   5  -6   17.76    1.16
  -2   5   6   17.42    1.04
   2  -5  -6   19.67    1.18
  -2  -5   6   18.90    1.15
   2   5  -6   17.07    1.14
   1  -5  -6    2.11    0.51
   1   5  -6    1.12    0.51
   1   5  -6    1.47    0.44
  -1   5   6    1.84    0.41
   1  -5  -6    1.87    0.36
   1  -5  -6    2.21    0.57
  -1  -5   6    2.12    0.52
   1   5  -6    1.73    0.58
   0  -5  -6    2.71    0.53
   0   5  -6    2.18    0.49
   0   5  -6    1.89    0.50
   0  -5  -6    1.53    0.44
   0  -5  -6    2.20    0.41
   0  -5  -6    1.31    0.53
   0  -5   6    2.08    0.49
   0   5  -6    1.40    0.57
  -1  -5  -6    1.47    0.41
  -1  -5  -6    1.08    0.48
   1  -5   6    1.32    0.39
  -1  -5  -6    1.03    0.48
  -1   5  -6    1.74    0.52
  -1   5  -6    1.87    0.49
  -2  -5  -6   32.09    1.50
  -2   5  -6   32.48    1.54
  -2  -5  -6   32.44    1.66
  -2   5  -6   31.23    1.62
  -2  -5  -6   31.63    1.66
  -2   5  -6   30.41    1.71
  -2  -5  -6   31.03    1.76
  -3  -5  -6   58.74    2.37
  -3   5  -6   56.27    2.32
  -3  -5  -6   55.01    2.50
  -3   5  -6   57.39    2.51
  -3  -5  -6   56.23    2.54
  -3   5  -6   61.15    2.62
  -3   5  -6   54.69    2.39
  -4  -5  -6   13.53    1.13
  -4   5  -6   13.59    1.12
  -4  -5  -6   15.31    1.08
  -4   5  -6   15.16    0.99
  -4   5  -6   13.99    1.19
  -5   5  -6   17.43    1.08
  -5   5  -6   16.63    1.27
  -5  -5  -6   16.97    1.29
  -5   5  -6   18.65    1.34
  -5  -5  -6   17.44    1.40
  -6   5  -6    2.04    0.47
  -6   5  -6    1.24    0.63
  -6  -5  -6    2.62    0.87
  -6  -5  -6    1.88    0.64
  -6   5  -6    2.34    0.49
   6   5   6    1.95    0.60
   6  -5   6    1.55    0.61
   7   5   6  228.93    7.66
   7  -5   6  223.65    7.65
  -7  -5  -6  235.34    7.65
  -7  -5  -6  220.77    7.59
  -7   5  -6  225.39    7.45
  -7   5  -6  223.29    7.61
  -7  -5  -6  234.27    7.85
  -8  -5  -6   21.30    1.29
  -8   5  -6   18.35    1.04
   8   5   6   18.99    1.17
   8  -5   6   18.38    1.15
  -8  -5  -6   21.97    1.22
   9   5   6   23.13    1.17
   9  -5   6   24.70    1.19
  -9  -5  -6   26.31    1.26
   9   6  -6   17.31    0.92
  -8  -6   6    0.38    0.39
   8   6  -6    1.31    0.50
   8   6  -6    0.78    0.41
   8  -6  -6    0.70    0.41
  -8   6   6    1.02    0.53
   7   6  -6    2.25    0.57
   7   6  -6    3.68    0.74
  -7  -6   6    3.33    0.67
   7  -6  -6    2.79    0.60
  -7   6   6    3.13    0.75
   6  -6  -6  174.50    6.03
   6   6  -6  165.97    5.98
  -6   6   6  173.39    6.01
   5   6  -6  398.15   12.88
   5  -6  -6  393.99   12.80
   5   6  -6  399.51   12.80
  -5   6   6  393.59   12.76
   4   6  -6   15.22    1.20
  -4   6   6   14.19    1.08
  -4  -6   6   14.70    1.16
   4  -6  -6   14.57    1.08
   4   6  -6   14.44    1.10
   3  -6  -6  191.05    6.28
   3   6  -6  188.52    6.27
   3   6  -6  185.09    6.33
  -3   6   6  175.86    6.16
   3  -6  -6  180.34    6.17
  -3  -6   6  188.32    6.30
   3   6  -6  169.97    6.25
   2  -6  -6    5.31    0.65
  -2   6   6    4.31    0.57
  -2  -6   6    4.15    0.68
   2  -6  -6    4.92    0.62
   2   6  -6    4.08    0.67
   2   6  -6    3.91    0.58
   1  -6  -6    2.04    0.37
   1  -6  -6    2.11    0.54
   1   6  -6    2.46    0.50
   1  -6  -6    1.67    0.49
   1   6  -6    1.86    0.51
  -1  -6   6    1.71    0.52
   1   6  -6    1.43    0.56
   0  -6  -6   31.46    1.52
   0   6  -6   29.54    1.49
   0  -6  -6   32.25    1.66
   0   6  -6   28.33    1.47
   0  -6  -6   29.36    1.34
   0  -6   6   30.14    1.48
   0  -6  -6   28.03    1.43
  -1  -6  -6   49.54    2.15
  -1   6  -6   48.30    2.14
  -1  -6  -6   50.11    2.01
  -1   6  -6   47.67    2.08
  -1  -6  -6   51.40    2.33
   1  -6   6   49.13    2.05
  -1   6  -6   49.22    2.31
  -1  -6  -6   49.46    2.16
  -2  -6  -6    5.38    0.69
  -2   6  -6    4.58    0.66
  -2   6  -6    3.98    0.58
  -2  -6  -6    4.65    0.69
  -2  -6  -6    4.45    0.55
   2  -6   6    4.17    0.52
  -2   6  -6    4.86    0.83
  -3   6  -6   23.25    1.24
  -3  -6  -6   23.72    1.28
  -3  -6  -6   21.75    1.36
  -3   6  -6   22.59    1.38
  -3   6  -6   24.05    1.52
  -3  -6  -6   22.02    1.44
  -3   6  -6   20.87    1.27
  -4  -6  -6  265.19    8.62
  -4   6  -6  260.65    8.76
  -4  -6  -6  261.68    8.77
  -4   6  -6  260.96    8.50
  -4   6  -6  256.81    8.83
  -5   6  -6    0.34    0.63
  -5  -6  -6    0.32    0.78
  -5   6  -6    0.16    0.37
  -5  -6  -6    0.03    0.56
  -6   6  -6    3.03    0.66
  -6  -6  -6    3.55    0.89
   6   6   6    3.05    0.62
   6  -6   6    2.52    0.59
  -6  -6  -6    2.16    0.69
  -7  -6  -6    0.61    0.66
  -7   6  -6    0.19    0.42
  -7  -6  -6    0.81    0.52
  -7   6  -6    0.21    0.40
   7   6   6    0.03    0.45
   7  -6   6    0.46    0.46
  -8  -6  -6  213.37    6.59
  -8  -6  -6  218.97    6.49
   8   6   6  178.67    6.30
   8  -6   6  181.51    6.31
  -8   6  -6  183.14    6.24
  -9  -6  -6    2.18    0.41
  -8  -7   6    0.96    0.40
  -8   7   6    1.25    0.52
   8   7  -6    0.55    0.47
   8  -7  -6    0.76    0.33
  -7  -7   6    1.75    0.55
  -7   7   6    1.22    0.64
   7   7  -6    0.96    0.43
   7  -7  -6    1.82    0.49
  -6  -7   6    6.64    0.86
  -6   7   6    6.03    0.88
   6   7  -6    4.76    0.68
   6  -7  -6    5.73    0.69
   6   7  -6    5.09    0.85
  -5   7   6    5.65    0.84
   5  -7  -6    4.98    0.71
   5   7  -6    4.77    0.69
   5   7  -6    4.56    0.88
   5   7  -6    3.28    0.61
  -4   7   6    1.51    0.65
   4  -7  -6    0.98    0.49
   4   7  -6    0.97    0.48
   4   7  -6    2.03    0.73
  -4  -7   6    1.62    0.68
   4   7  -6    1.54    0.56
  -3   7   6   25.49    1.40
   3   7  -6   23.98    1.48
  -3  -7   6   26.82    1.50
   3  -7  -6   24.92    1.38
   3   7  -6   23.51    1.36
   2  -7  -6   97.62    3.59
   2   7  -6   95.93    3.59
   2   7  -6   98.57    3.69
  -2   7   6   93.91    3.50
  -2  -7   6  105.31    3.73
   2   7  -6   90.29    3.72
   1  -7  -6   49.80    2.25
  -1  -7   6   48.90    2.17
   1  -7  -6   49.98    2.12
   1   7  -6   50.23    2.13
   1   7  -6   48.53    2.17
   0  -7  -6   44.36    1.96
   0   7  -6   43.83    1.95
   0   7  -6   42.51    1.96
   0  -7  -6   43.29    1.77
   0  -7   6   46.43    1.99
   0  -7  -6   45.34    1.92
  -1   7  -6    5.14    0.64
  -1  -7  -6    4.61    0.64
  -1   7  -6    4.06    0.59
  -1  -7  -6    4.36    0.63
  -1  -7  -6    5.43    0.55
   1  -7   6    4.74    0.60
  -1   7  -6    4.93    0.85
  -2  -7  -6  136.21    4.75
  -2   7  -6  132.97    4.73
  -2  -7  -6  133.02    4.57
  -2   7  -6  135.58    4.63
   2  -7   6  127.14    4.55
  -2  -7  -6  136.97    4.83
  -2   7  -6  131.78    4.96
   2  -7   6  126.49    4.51
  -3   7  -6  106.90    4.10
   3  -7   6  103.06    3.75
  -3  -7  -6  109.11    4.07
  -3  -7  -6  103.49    3.78
  -3  -7  -6  106.31    3.93
  -3   7  -6  103.86    3.92
  -3   7  -6  104.28    3.74
  -3   7  -6   97.08    3.80
  -4  -7  -6   76.05    3.32
  -4   7  -6   78.23    3.30
  -4  -7  -6   83.22    3.11
  -4   7  -6   81.42    3.19
  -4  -7  -6   76.02    3.14
  -4   7  -6   77.09    2.95
  -5  -7  -6   69.02    2.76
  -5  -7  -6   64.38    2.92
   5  -7   6   62.90    2.68
   5   7   6   62.48    2.68
  -6  -7  -6    0.34    0.54
  -6  -7  -6    0.40    0.71
  -6   7  -6    0.19    0.49
  -6  -7  -6    1.27    0.68
   6   7   6    0.06    0.41
   6  -7   6   -0.13    0.45
  -7  -7  -6   31.43    1.53
  -7  -7  -6   30.16    1.53
  -7   7  -6   26.35    1.34
   7   7   6   23.81    1.32
   7  -7   6   24.66    1.34
  -7  -7  -6   29.65    1.66
  -8   7  -6   35.99    1.48
   8  -7   6   29.11    1.41
  -8  -8   6   21.53    1.15
  -8   8   6   28.86    1.30
  -7  -8   6    0.26    0.46
  -7   8   6    0.30    0.55
   7   8  -6    0.13    0.53
  -6  -8   6    2.68    0.66
  -6   8   6    2.55    0.70
   6  -8  -6    2.25    0.47
   6   8  -6    2.19    0.71
  -5   8   6   61.25    2.61
   5   8  -6   62.53    2.71
   5  -8  -6   56.98    2.45
  -4  -8   6    5.86    0.86
  -4   8   6    6.19    0.82
   4  -8  -6    5.11    0.64
   4   8  -6    4.65    0.81
   3  -8  -6   18.59    1.12
  -3   8   6   19.25    1.20
   3   8  -6   17.02    1.29
  -3  -8   6   20.31    1.35
   3   8  -6   17.62    1.30
  -2   8   6   55.69    2.29
  -2  -8   6   57.21    2.48
   2  -8  -6   55.83    2.32
   2   8  -6   56.91    2.47
  -1  -8   6   99.44    3.72
   1  -8  -6   97.90    3.57
   1   8  -6   95.50    3.67
   0  -8  -6    8.40    0.73
   0   8  -6    9.69    0.83
   0  -8   6    8.99    0.85
   0  -8   6    7.19    0.64
   0  -8  -6    7.13    0.69
  -1  -8  -6    5.06    0.62
  -1   8  -6    5.16    0.65
  -1  -8  -6    4.90    0.68
  -1  -8  -6    4.61    0.52
   1  -8   6    5.24    0.70
   1  -8   6    5.14    0.57
  -1   8  -6    4.08    0.91
  -2  -8  -6  253.48    8.36
  -2   8  -6  258.84    8.41
   2  -8   6  265.06    8.44
  -2  -8  -6  267.93    8.66
  -2   8  -6  267.95    8.82
   2  -8   6  257.45    8.39
  -2  -8  -6  242.95    8.46
  -3  -8  -6  407.21   13.71
  -3   8  -6  437.03   13.61
  -3  -8  -6  434.53   13.66
  -3  -8  -6  453.08   14.01
  -3   8  -6  453.09   14.07
   3  -8   6  421.08   13.68
  -4  -8  -6  235.47    7.69
  -4  -8  -6  226.85    7.97
  -4   8  -6  229.17    7.93
  -5  -8  -6    7.79    0.79
  -5   8  -6    7.86    0.91
  -5  -8  -6    5.46    0.93
   5  -8   6    6.29    0.67
  -6  -8  -6   18.40    1.20
  -6  -8  -6   21.14    1.38
  -6  -8  -6   20.16    1.44
   6  -8   6   16.71    1.05
  -6   8  -6   20.24    1.26
  -7  -8  -6    1.89    0.51
  -7  -8  -6    2.01    0.63
  -7  -8  -6    1.15    0.52
  -7   8  -6    0.44    0.39
  -8  -8  -6   80.68    2.73
  -8  -8  -6   77.46    2.85
  -8   9   6    7.73    0.63
   8   9  -6    5.89    0.60
  -7   9   6    2.59    0.59
   7   9  -6    2.05    0.56
  -7  -9   6    2.48    0.50
  -6   9   6    4.87    0.75
   6   9  -6    4.57    0.76
  -6  -9   6    4.60    0.70
  -5   9   6   34.05    1.78
   5   9  -6   36.24    1.90
  -4   9   6   13.04    1.04
   4   9  -6   11.64    1.11
   3   9  -6   21.93    1.48
  -3  -9   6   21.37    1.17
   3   9  -6   22.15    1.43
  -3  -9   6   23.18    1.48
   2   9  -6    4.02    0.73
  -2  -9   6    4.82    0.76
  -2  -9   6    3.79    0.53
   1   9  -6   98.52    3.61
  -1  -9   6   95.07    3.66
  -1  -9   6   90.45    3.39
   0   9  -6   27.07    1.44
   0   9  -6   25.35    1.69
   0  -9   6   26.08    1.34
   0  -9   6   30.83    1.58
  -1   9  -6   20.28    1.21
  -1   9  -6   23.27    1.58
   1  -9   6   21.76    1.20
   1  -9   6   22.54    1.32
  -1  -9  -6   22.62    1.31
  -2   9  -6  543.55   16.94
  -2  -9  -6  519.49   16.86
   2  -9   6  545.20   17.03
  -2   9  -6  567.11   17.42
   2  -9   6  540.81   17.00
  -2  -9  -6  561.97   17.25
  -3  -9  -6   27.34    1.42
  -3  -9  -6   27.67    1.67
  -3   9  -6   31.29    1.82
   3  -9   6   31.30    1.55
  -4  -9  -6    1.85    0.74
  -4  -9  -6    1.77    0.78
  -4   9  -6    1.76    0.70
  -4  -9  -6    1.45    0.47
  -5  -9  -6    0.76    0.49
  -5   9  -6    0.54    0.55
  -5  -9  -6    0.56    0.66
  -6  -9  -6    4.33    0.63
  -6  -9  -6    3.95    0.79
  -6   9  -6    4.24    0.60
  -6  -9  -6    5.89    0.83
  -7  -9  -6   -0.33    0.40
  -7  -9  -6   -0.17    0.55
  -7  -9  -6   -0.39    0.47
  -7   9  -6    0.22    0.33
  -8  -9  -6    5.71    0.53
  -8  -9  -6    6.04    0.62
   7  10  -6   18.06    1.09
  -7  10   6   20.51    1.08
  -6 -10   6   32.42    1.58
   6  10  -6   30.93    1.67
  -6  10   6   33.14    1.63
   5  10  -6    9.16    0.97
  -5  10   6    8.46    0.90
  -4 -10   6    6.26    0.64
   4  10  -6    8.49    0.93
  -4  10   6    8.02    0.85
   3  10  -6    0.07    0.55
  -3 -10   6    0.53    0.73
   3  10  -6    0.97    0.63
  -3 -10   6    1.07    0.41
   2  10  -6   12.32    1.00
  -2 -10   6   10.63    1.04
  -2 -10   6   10.90    0.84
   1  10  -6  121.91    4.37
  -1 -10   6  124.70    4.47
  -1 -10   6  115.30    4.22
   0  10  -6  103.56    3.79
   0  10  -6  101.44    4.14
   0 -10   6  102.31    3.74
   0 -10   6  105.19    3.93
  -1  10  -6   51.61    2.10
  -1 -10  -6   47.10    2.18
   1 -10   6   50.08    2.24
  -1  10  -6   54.23    2.56
   1 -10   6   47.06    2.09
  -2 -10  -6  121.54    4.48
  -2  10  -6  122.59    4.68
   2 -10   6  117.56    4.31
  -3 -10  -6    8.57    0.94
  -3  10  -6   10.15    1.08
   3 -10   6   10.42    0.88
  -3 -10  -6    7.38    0.68
  -4 -10  -6   17.48    1.32
  -4  10  -6   17.81    1.29
  -4 -10  -6   16.37    1.02
  -4 -10  -6   16.63    1.35
  -5 -10  -6    4.30    0.58
  -5 -10  -6    3.04    0.75
  -5  10  -6    3.73    0.66
  -5 -10  -6    2.95    0.76
  -6 -10  -6    0.30    0.36
  -6 -10  -6    0.21    0.57
  -7 -10  -6    0.42    0.33
  -7 -10  -6    0.03    0.41
  -7  10  -6   -0.06    0.30
  -7 -10  -6    0.06    0.46
   7  11  -6   16.11    0.93
  -7  11   6   18.08    0.93
  -6 -11   6    4.75    0.61
   6  11  -6    4.16    0.65
  -6  11   6    3.52    0.61
   5  11  -6   10.55    0.95
   5  11  -6   10.62    0.92
  -5 -11   6   11.29    0.94
  -5  11   6   11.49    0.93
   4  11  -6    2.36    0.67
  -4 -11   6    2.46    0.49
   4  11  -6    3.26    0.68
  -4  11   6    3.56    0.63
   3  11  -6    4.68    0.74
  -3 -11   6    4.03    0.58
  -3 -11   6    5.40    0.81
  -3  11   6    4.29    0.65
   2  11  -6  130.78    4.72
   2  11  -6  130.78    5.00
  -2 -11   6  127.54    4.60
  -2 -11   6  137.78    4.85
   1  11  -6    9.62    0.85
  -1 -11   6   10.60    0.84
  -1 -11   6    9.31    1.02
   1 -11  -6    8.61    0.82
   0  11  -6   59.24    2.38
   0 -11  -6   55.65    2.52
   0  11  -6   58.25    2.79
   0 -11   6   59.50    2.41
   0 -11   6   57.74    2.55
  -1 -11  -6   20.05    1.39
  -1  11  -6   19.41    1.51
   1 -11   6   22.53    1.26
   1 -11   6   22.20    1.35
  -1 -11  -6   19.43    1.22
  -2 -11  -6    4.97    0.75
  -2 -11  -6    7.09    0.97
   2 -11   6    7.28    0.77
  -2  11  -6    6.16    0.96
  -3 -11  -6   29.50    1.66
  -3  11  -6   28.94    1.71
   3 -11   6   27.93    1.51
  -3 -11  -6   27.68    1.72
  -4 -11  -6    4.50    0.78
  -4 -11  -6    5.09    0.89
  -4  11  -6    4.18    0.74
  -4 -11  -6    3.31    0.48
  -5 -11  -6    0.18    0.33
  -5  11  -6    0.80    0.46
  -5 -11  -6    1.43    0.63
  -5 -11  -6    0.35    0.58
  -6 -11  -6    0.12    0.29
  -6 -11  -6    0.51    0.53
  -7 -11  -6    0.16    0.35
  -7 -11  -6    0.12    0.36
  -6 -12   6   34.32    1.51
  -6  12   6   36.36    1.55
   6  12  -6   35.23    1.57
  -5  12   6    2.86    0.55
   5  12  -6    3.02    0.57
   5  12  -6    2.87    0.59
  -5 -12   6    3.74    0.58
   4  12  -6   -0.23    0.52
  -4 -12   6    0.33    0.35
  -4  12   6    0.22    0.46
   4  12  -6    0.39    0.44
  -3  12   6    5.21    0.63
  -3 -12   6    6.83    0.67
   3  12  -6    6.44    0.92
  -3 -12   6    6.91    0.84
   3  12  -6    6.19    0.72
  -2 -12   6   54.27    2.34
   2  12  -6   57.77    2.40
  -1 -12   6    0.65    0.45
   1  12  -6    0.56    0.80
   1  12  -6    0.11    0.37
   1 -12  -6    0.25    0.37
  -1 -12   6    1.24    0.65
   0  12  -6   15.55    1.39
   0 -12   6   16.40    1.07
   0 -12   6   17.16    1.22
   0 -12  -6   16.27    1.14
  -1 -12  -6    0.39    0.55
   1 -12   6    0.28    0.45
  -1  12  -6    0.94    0.76
  -2 -12  -6   68.30    2.82
  -2  12  -6   68.87    3.04
   2 -12   6   70.40    2.80
  -2 -12  -6   71.24    2.99
  -3 -12  -6   38.56    1.93
  -3  12  -6   39.59    2.02
   3 -12   6   38.72    1.83
  -3 -12  -6   38.62    2.01
  -4 -12  -6   28.75    1.63
  -4  12  -6   32.25    1.63
  -5 -12  -6    8.25    0.87
  -5 -12  -6    9.15    0.91
  -6 -12  -6    2.42    0.54
  -6 -12  -6    2.32    0.53
  -5  13   6   36.20    1.50
   5  13  -6   32.92    1.48
  -5 -13   6   36.27    1.54
   4  13  -6    0.92    0.55
  -4 -13   6    0.62    0.33
  -4  13   6    1.03    0.42
   4  13  -6    0.82    0.41
  -3 -13   6    0.42    0.37
   3  13  -6    0.45    0.38
  -2 -13   6    5.74    0.80
  -2 -13   6    4.81    0.60
  -1 -13   6    8.58    0.89
  -1 -13   6    7.14    0.72
   1  13  -6    6.56    1.02
   0 -13   6    0.38    0.45
   0  13  -6    0.23    0.73
   0 -13  -6   -0.33    0.41
  -1 -13  -6   20.20    1.27
  -1  13  -6   22.61    1.53
   1 -13   6   20.49    1.21
  -2 -13  -6    3.94    0.59
   2 -13   6    5.91    0.68
  -2  13  -6    5.63    0.85
  -2 -13  -6    5.09    0.75
  -3 -13  -6    2.04    0.53
   3 -13   6    2.76    0.56
  -3  13  -6    1.56    0.61
  -3 -13  -6    2.01    0.63
  -4  13  -6    1.90    0.49
  -4 -13  -6    1.50    0.52
  -5 -13  -6   54.40    2.21
  -5 -13  -6   48.01    2.11
  -5 -14   6    0.26    0.27
   4  14  -6    0.30    0.41
  -4 -14   6    0.19    0.38
  -3 -14   6    0.15    0.31
   3  14  -6   -0.18    0.58
  -2 -14   6    2.11    0.45
  -2 -14   6    2.09    0.57
   1  14  -6   24.27    1.55
  -1 -14   6   24.37    1.26
   0 -14   6    2.57    0.51
   0  14  -6    2.35    0.76
  -1  14  -6    9.13    0.97
   1 -14   6    9.39    0.79
  -1 -14  -6    9.19    0.79
  -2 -14  -6    0.87    0.50
   2 -14   6    0.68    0.43
  -2  14  -6    0.43    0.55
  -3 -14  -6    5.53    0.71
  -3  14  -6    5.38    0.67
  -3 -14  -6    4.12    0.54
  -4 -14  -6    3.39    0.58
  -4 -14  -6    2.12    0.45
  -5 -14  -6   -0.18    0.28
   4  15  -6    5.87    0.60
   3  15  -6    3.54    0.61
  -2 -15   6    7.53    0.60
  -1 -15   6    0.44    0.34
   1  15  -6   -0.04    0.61
   0 -15   6    0.79    0.39
   0  15  -6    0.54    0.56
  -1  15  -6    7.04    0.81
   1 -15   6    8.77    0.70
  -2  15  -6   41.62    1.87
  -2 -15  -6   37.86    1.73
  -3  15  -6    8.85    0.67
  -3 -15  -6    9.82    0.72
  -4 -15  -6    1.61    0.38
   2  16  -6    2.91    0.55
   1  16  -6    0.86    0.48
   0  16  -6   12.68    0.91
   0 -16   6   11.16    0.71
  -1  16  -6    2.82    0.50
   1 -16   6    3.09    0.41
   2 -16   6    0.51    0.28
   9   0  -7    0.50    0.36
  -9   0   7   -0.05    0.32
   8   0  -7    0.10    0.48
   7   0  -7   -0.05    0.35
   7   0  -7   -0.35    0.61
  -7   0   7    0.77    0.61
   6   0  -7   -0.31    0.43
   6   0  -7   -0.59    0.67
   5   0  -7    0.62    0.48
   5   0  -7   -0.17    0.67
   4   0  -7    0.08    0.60
   4   0  -7    0.29    0.48
   3   0  -7    0.08    0.58
   3   0  -7   -0.22    0.49
   2   0  -7    0.64    0.47
   2   0  -7    0.15    0.54
   2   0  -7    0.35    0.36
   1   0  -7    0.52    0.41
  -1   0   7    0.24    0.35
   1   0  -7    0.09    0.47
   1   0  -7    0.11    0.52
   0   0  -7   -0.03    0.45
   0   0  -7    0.50    0.52
   0   0  -7    0.03    0.44
   0   0  -7    0.32    0.61
  -1   0  -7    0.07    0.55
  -1   0  -7   -0.04    0.49
  -1   0  -7   -0.04    0.60
  -2   0  -7   -0.16    0.57
  -2   0  -7   -0.20    0.56
  -2   0  -7    0.41    0.54
  -2   0  -7    0.45    0.60
  -3   0  -7    0.18    0.64
  -3   0  -7   -0.10    0.53
  -3   0  -7    0.04    0.57
  -4   0  -7   -0.19    0.69
  -4   0  -7    0.64    0.73
  -4   0  -7    0.52    0.58
  -4   0  -7   -0.21    0.54
  -5   0  -7   -0.14    0.74
  -5   0  -7   -0.52    0.73
  -5   0  -7    0.46    0.55
  -6   0  -7    0.19    0.72
  -6   0  -7    0.55    0.75
  -6   0  -7    0.03    0.54
  -7   0  -7   -0.48    0.61
   7   0   7    0.04    0.60
  -7   0  -7   -0.09    0.49
  -8   0  -7    0.29    0.43
   8   0   7   -0.28    0.49
  -8   0  -7    0.31    0.39
   9   0   7    0.27    0.32
   9   1  -7   32.93    1.46
  -9   1   7   32.68    1.38
  -9  -1   7   29.47    1.34
   8   1  -7    1.64    0.56
   7   1  -7    3.97    0.58
  -7  -1   7    4.75    0.76
   7  -1  -7    3.92    0.76
   7   1  -7    4.49    0.80
  -6  -1   7   45.41    2.12
   6   1  -7   45.17    2.02
   6  -1  -7   40.19    1.85
   6  -1  -7   45.42    2.21
   6   1  -7   44.48    2.20
   5  -1  -7   83.55    3.39
  -5  -1   7   91.00    3.49
  -5   1   7   87.89    3.47
   5   1  -7   90.42    3.45
   5  -1  -7   90.05    3.35
   5  -1  -7   85.79    3.61
   5   1  -7   87.71    3.61
   4  -1  -7  295.72    9.55
  -4   1   7  279.53    9.39
   4   1  -7  290.32    9.45
   4  -1  -7  288.11    9.36
   4  -1  -7  280.10    9.57
   4   1  -7  288.19    9.60
   3  -1  -7    6.22    0.83
  -3   1   7    5.72    0.73
  -3  -1   7    5.90    0.73
   3  -1  -7    5.42    0.68
   3  -1  -7    5.14    0.81
   3   1  -7    5.44    0.82
   3   1  -7    5.52    0.75
   2  -1  -7    3.80    0.72
   2   1  -7    3.05    0.53
  -2  -1   7    3.86    0.59
   2  -1  -7    2.75    0.56
   2  -1  -7    2.88    0.67
   2   1  -7    3.45    0.68
   2   1  -7    3.93    0.65
   1  -1  -7  376.72   12.34
   1   1  -7  385.88   12.35
   1  -1  -7  382.99   12.20
  -1   1   7  377.48   12.04
   1  -1  -7  393.81   12.50
  -1  -1   7  383.26   12.09
   1   1  -7  384.58   12.27
   1  -1  -7  383.76   12.20
   0  -1  -7   15.96    1.05
   0  -1  -7   16.02    1.15
   0   1  -7   17.60    1.19
   0   1  -7   16.26    1.14
   0  -1  -7   16.14    1.11
  -1   1  -7   16.13    1.08
  -1  -1  -7   15.95    1.08
  -1   1  -7   16.76    1.27
  -1  -1  -7   18.54    1.34
  -1  -1  -7   16.43    1.19
  -1   1  -7   17.37    1.22
  -1   1  -7   16.07    1.19
  -1  -1  -7   15.96    1.15
  -2   1  -7    6.81    0.78
  -2   1  -7    5.89    0.89
  -2  -1  -7    7.26    0.94
  -2   1  -7    6.23    0.84
  -2  -1  -7    6.58    0.88
  -2   1  -7    5.94    0.85
  -3  -1  -7   53.53    2.60
  -3   1  -7   55.64    2.61
  -3   1  -7   57.62    2.44
  -3  -1  -7   54.54    2.41
  -3  -1  -7   58.23    2.62
  -3   1  -7   58.69    2.57
  -4   1  -7   15.83    1.14
  -4  -1  -7   16.30    1.17
  -4  -1  -7   16.52    1.36
  -4   1  -7   14.69    1.34
  -4   1  -7   16.79    1.23
  -4  -1  -7   15.48    1.23
  -4  -1  -7   16.69    1.36
  -5   1  -7  105.66    4.18
  -5  -1  -7  107.79    4.19
  -5   1  -7   99.57    4.13
  -5  -1  -7  103.59    3.90
  -5   1  -7  101.61    3.86
  -5  -1  -7   96.53    4.11
  -6   1  -7    3.88    0.70
  -6  -1  -7    3.99    0.71
  -6   1  -7    3.40    0.83
  -6  -1  -7    5.48    0.95
  -7  -1  -7   35.24    1.71
  -7   1  -7   32.97    1.64
   7   1   7   36.05    1.85
  -7   1  -7   34.50    1.84
  -7  -1  -7   32.95    1.84
  -8   1  -7    0.49    0.36
  -8  -1  -7    0.84    0.44
   8   1   7    0.44    0.49
  -8   1  -7    0.31    0.42
  -8  -1  -7    0.83    0.45
   9   1   7    2.35    0.42
   8   2  -7    3.23    0.61
   8   2  -7    1.74    0.39
  -8   2   7    3.58    0.58
   7   2  -7    0.71    0.48
  -7  -2   7    0.17    0.57
   7   2  -7   -0.04    0.60
   6   2  -7    0.76    0.56
  -6   2   7    0.88    0.69
  -6  -2   7    1.35    0.66
   6   2  -7   -0.21    0.65
  -5   2   7   47.70    2.18
  -5  -2   7   49.70    2.23
   5  -2  -7   47.70    1.99
   5   2  -7   47.46    2.19
   5   2  -7   46.40    2.28
   4  -2  -7   20.95    1.32
  -4   2   7   19.09    1.28
  -4  -2   7   19.47    1.31
   4   2  -7   20.96    1.34
   4  -2  -7   19.20    1.15
   4   2  -7   19.59    1.38
   3  -2  -7   74.30    3.02
  -3  -2   7   71.09    2.87
  -3   2   7   69.66    2.80
   3   2  -7   68.11    2.88
   3  -2  -7   73.62    2.80
   3   2  -7   68.22    2.97
   2   2  -7   13.20    1.07
   2  -2  -7   12.80    0.92
  -2   2   7   13.44    0.91
   2  -2  -7   13.55    1.11
  -2  -2   7   11.75    0.92
   2   2  -7   12.36    0.93
   1   2  -7  216.27    7.32
   1  -2  -7  219.39    7.16
   1  -2  -7  223.41    7.45
  -1  -2   7  212.16    7.09
   1   2  -7  212.72    7.27
   1  -2  -7  213.85    7.14
   0   2  -7    4.53    0.70
   0   2  -7    3.89    0.67
   0  -2  -7    4.63    0.65
   0  -2  -7    4.14    0.61
   0  -2   7    3.37    0.46
   0   2  -7    3.42    0.66
  -1   2  -7   12.07    0.95
  -1  -2  -7   11.93    0.91
  -1  -2  -7   11.29    1.08
  -1   2  -7   10.91    1.01
  -1   2  -7   10.12    1.00
  -1  -2  -7   12.68    1.01
  -2   2  -7    1.86    0.58
  -2  -2  -7    1.54    0.55
  -2   2  -7    1.74    0.67
  -2  -2  -7    0.94    0.67
  -2  -2  -7    1.86    0.67
  -2   2  -7    2.21    0.69
  -3   2  -7   -0.10    0.51
  -3   2  -7    0.44    0.58
  -3  -2  -7   -0.44    0.70
  -3   2  -7    0.17    0.71
  -3  -2  -7   -0.30    0.66
  -3   2  -7    0.13    0.66
  -4   2  -7    9.43    0.91
  -4  -2  -7    9.89    1.04
  -4   2  -7    9.59    1.13
  -4  -2  -7    9.45    0.96
  -4   2  -7    8.37    1.02
  -4   2  -7    9.20    0.90
  -5   2  -7    3.69    0.70
  -5  -2  -7    4.43    0.78
  -5   2  -7    4.74    0.93
  -5   2  -7    4.28    0.93
  -5  -2  -7    3.34    0.93
  -6  -2  -7   43.88    2.07
  -6   2  -7   42.84    1.99
  -6   2  -7   43.49    2.24
  -6  -2  -7   45.70    2.29
  -7  -2  -7   20.69    1.26
  -7   2  -7   20.23    1.17
   7   2   7   19.82    1.31
  -7  -2  -7   19.08    1.37
  -7   2  -7   20.45    1.33
  -8   2  -7    3.39    0.46
  -8  -2  -7    3.71    0.56
   8   2   7    3.14    0.61
   8  -2   7    3.11    0.61
  -8  -2  -7    3.75    0.59
  -8   2  -7    3.05    0.53
   8   3  -7   39.23    1.75
  -8  -3   7   46.00    1.88
   8  -3  -7   42.94    1.94
   8   3  -7   41.62    1.90
   7  -3  -7    5.72    0.82
   7   3  -7    6.38    0.82
   7   3  -7    6.72    0.76
  -7   3   7    6.16    0.79
  -6  -3   7    0.80    0.64
   6  -3  -7    0.45    0.62
   6   3  -7    0.08    0.60
   6   3  -7    1.10    0.60
  -6   3   7    0.21    0.67
   5   3  -7   90.11    3.61
  -5   3   7   92.12    3.56
  -5  -3   7   92.96    3.63
   5  -3  -7   94.24    3.70
   5   3  -7   90.54    3.68
   4  -3  -7   48.13    2.03
   4   3  -7   49.54    2.29
  -4   3   7   47.53    2.17
   4  -3  -7   50.43    2.22
  -4  -3   7   50.44    2.25
   4  -3  -7   45.12    2.29
   4   3  -7   47.90    2.32
   3  -3  -7   11.74    1.05
   3   3  -7   13.26    1.09
   3  -3  -7   11.76    0.85
  -3   3   7   10.91    0.91
   3  -3  -7   11.01    0.99
  -3  -3   7   12.13    1.02
   3   3  -7   12.95    0.94
   2  -3  -7    0.29    0.52
   2   3  -7    0.37    0.54
   2  -3  -7    0.44    0.41
  -2   3   7    0.24    0.41
   2  -3  -7    1.03    0.56
  -2  -3   7    0.37    0.50
   2   3  -7   -0.24    0.51
   1  -3  -7  207.71    7.01
   1   3  -7  210.17    7.03
   1   3  -7  209.16    6.94
   1  -3  -7  204.55    6.81
   1  -3  -7  211.10    7.13
  -1  -3   7  206.50    6.82
   1  -3  -7  195.84    6.77
   1   3  -7  201.33    6.99
   0  -3  -7    5.58    0.78
   0   3  -7    6.27    0.80
   0   3  -7    6.30    0.78
   0  -3  -7    6.99    0.69
   0  -3  -7    4.47    0.64
   0  -3   7    5.85    0.60
   0   3  -7    5.52    0.80
  -1  -3  -7   63.15    2.56
  -1   3  -7   61.23    2.60
  -1  -3  -7   63.56    2.73
  -1   3  -7   60.98    2.70
  -1  -3  -7   68.00    2.73
  -1   3  -7   63.58    2.77
  -1  -3  -7   68.52    2.87
  -2   3  -7    9.41    0.98
  -2   3  -7    9.34    0.89
  -2  -3  -7   10.16    0.88
  -2  -3  -7    9.84    1.01
  -2  -3  -7   10.78    1.02
  -2  -3  -7   11.03    1.12
  -2   3  -7    9.77    0.97
  -3  -3  -7   66.44    2.75
  -3   3  -7   65.60    2.72
  -3  -3  -7   63.62    2.93
  -3   3  -7   64.84    2.92
  -3  -3  -7   71.97    3.01
  -3   3  -7   69.43    3.00
  -3  -3  -7   68.64    2.98
  -3   3  -7   65.10    2.84
  -4   3  -7   38.70    1.86
  -4   3  -7   37.51    2.07
  -4  -3  -7   38.65    2.12
  -4   3  -7   37.51    1.90
  -4   3  -7   39.39    2.13
  -5  -3  -7   17.40    1.43
  -5   3  -7   16.95    1.41
  -5   3  -7   17.20    1.15
  -5   3  -7   17.43    1.35
  -5  -3  -7   15.95    1.36
  -5  -3  -7   16.51    1.22
  -6   3  -7   18.42    1.36
  -6  -3  -7   16.47    1.39
  -6  -3  -7   16.36    1.20
  -6   3  -7   17.27    1.12
  -7  -3  -7    7.47    0.80
  -7   3  -7    8.15    0.86
  -7  -3  -7    6.92    0.89
   7   3   7    7.58    0.85
   7  -3   7    7.62    0.85
  -7   3  -7    7.07    0.69
  -8  -3  -7   43.52    1.73
   8   3   7   37.47    1.74
   8  -3   7   35.65    1.72
  -8   3  -7   30.76    1.57
  -8  -3  -7   41.65    1.79
   8   4  -7   13.18    0.86
  -8  -4   7   14.48    0.90
   8  -4  -7   12.42    0.92
   8   4  -7   12.39    0.93
   7   4  -7   10.05    0.88
   7  -4  -7    9.01    0.92
   7   4  -7    9.65    0.92
  -7   4   7   10.20    0.91
   6   4  -7   13.11    1.12
  -6  -4   7   15.26    1.16
   6  -4  -7   14.43    1.17
   6   4  -7   13.09    1.14
  -6   4   7   14.81    1.14
   5   4  -7  687.06   21.35
  -5   4   7  668.38   21.22
  -5  -4   7  693.27   21.31
   5  -4  -7  682.24   21.38
   5   4  -7  663.98   21.38
  -4   4   7  116.95    4.23
   4  -4  -7  105.64    4.15
  -4  -4   7  120.84    4.33
   4  -4  -7  118.91    4.42
   4   4  -7  118.89    4.43
   3  -4  -7   56.42    2.49
   3   4  -7   51.87    2.46
   3  -4  -7   56.05    2.20
  -3   4   7   58.11    2.35
   3  -4  -7   54.88    2.43
  -3  -4   7   55.82    2.40
   3   4  -7   51.96    2.35
   2  -4  -7   28.30    1.59
   2   4  -7   27.69    1.59
   2   4  -7   29.41    1.61
   2  -4  -7   29.31    1.40
  -2   4   7   28.32    1.40
   2  -4  -7   28.28    1.60
  -2  -4   7   28.39    1.52
   2   4  -7   27.15    1.56
   1  -4  -7   52.25    2.33
   1   4  -7   51.66    2.34
   1  -4  -7   54.83    2.45
   1   4  -7   49.81    2.27
   1  -4  -7   55.00    2.17
  -1  -4   7   49.57    2.18
   1   4  -7   51.33    2.38
   0  -4  -7  128.10    4.61
   0   4  -7  123.67    4.59
   0  -4  -7  132.29    4.78
   0  -4   7  123.98    4.38
   0   4  -7  124.29    4.51
   0  -4  -7  124.05    4.40
   0  -4  -7  126.44    4.49
   0   4  -7  123.64    4.67
  -1   4  -7   27.77    1.53
  -1  -4  -7   28.77    1.47
  -1  -4  -7   29.32    1.63
  -1   4  -7   29.63    1.63
  -1  -4  -7   30.73    1.61
  -1   4  -7   28.99    1.70
  -2  -4  -7  149.27    5.27
  -2   4  -7  148.13    5.30
  -2  -4  -7  156.11    5.61
  -2   4  -7  156.39    5.50
  -2  -4  -7  155.15    5.51
  -2   4  -7  147.74    5.48
  -2  -4  -7  153.54    5.48
  -3  -4  -7    1.01    0.74
  -3   4  -7    1.13    0.53
  -3   4  -7    1.45    0.57
  -3  -4  -7    1.20    0.59
  -3   4  -7    1.03    0.74
  -3  -4  -7    1.05    0.71
  -3  -4  -7    0.35    0.61
  -3   4  -7    1.56    0.67
  -4   4  -7  189.74    6.75
  -4  -4  -7  191.88    6.50
  -4  -4  -7  184.90    6.69
  -4   4  -7  189.53    6.70
  -4   4  -7  190.72    6.44
  -4   4  -7  184.01    6.48
  -5   4  -7   45.94    2.09
  -5  -4  -7   46.01    2.35
  -5   4  -7   46.13    2.35
  -5  -4  -7   51.54    2.50
  -5   4  -7   50.20    2.42
  -6  -4  -7   12.81    1.05
  -6   4  -7   12.52    0.90
   6   4   7   12.23    1.08
   6  -4   7   11.24    1.04
  -6   4  -7   12.95    1.13
  -6  -4  -7   12.01    1.22
  -7   4  -7   29.97    1.41
  -7  -4  -7   32.23    1.60
   7   4   7   32.35    1.65
   7  -4   7   28.92    1.59
  -7   4  -7   32.62    1.65
  -7  -4  -7   36.47    1.82
  -7  -4  -7   28.35    1.48
  -8  -4  -7   54.83    2.13
  -8  -4  -7   51.57    2.20
   8   4   7   53.18    2.14
   8  -4   7   48.31    2.10
  -8  -5   7    4.97    0.56
   8  -5  -7    3.84    0.52
   8   5  -7    3.75    0.52
   8   5  -7    4.19    0.53
  -7   5   7    0.03    0.53
   7  -5  -7    0.74    0.48
   7   5  -7    0.49    0.50
   7   5  -7    1.03    0.51
  -6   5   7  140.89    5.01
   6   5  -7  141.69    5.09
  -6  -5   7  141.03    5.06
   6  -5  -7  140.79    5.11
   6   5  -7  139.60    5.10
  -5  -5   7    2.64    0.76
   5  -5  -7    2.12    0.65
   5   5  -7    2.38    0.67
  -5   5   7    1.68    0.66
   4  -5  -7    1.95    0.66
   4   5  -7    2.77    0.67
  -4   5   7    2.05    0.64
  -4  -5   7    1.59    0.71
   4   5  -7    2.11    0.49
   3  -5  -7   39.21    1.93
   3   5  -7   36.68    1.91
   3   5  -7   37.62    1.94
  -3   5   7   36.16    1.76
   3  -5  -7   39.68    1.88
  -3  -5   7   39.90    1.92
   3   5  -7   35.33    1.85
   2   5  -7    4.36    0.70
   2  -5  -7    5.22    0.75
   2   5  -7    6.03    0.83
  -2   5   7    5.31    0.62
   2  -5  -7    4.99    0.53
   2  -5  -7    5.90    0.78
  -2  -5   7    4.98    0.74
   2   5  -7    6.09    0.79
   1  -5  -7   44.20    2.09
   1   5  -7   43.95    2.10
   1  -5  -7   44.08    2.17
   1   5  -7   45.00    2.08
   1  -5  -7   45.47    1.90
  -1  -5   7   45.44    2.02
   1   5  -7   43.27    2.17
   0  -5  -7   27.30    1.55
   0   5  -7   26.59    1.54
   0  -5  -7   32.28    1.77
   0  -5   7   29.19    1.45
   0   5  -7   29.00    1.68
   0  -5  -7   26.62    1.44
   0   5  -7   27.52    1.52
   0  -5  -7   27.72    1.39
  -1  -5  -7   41.06    2.01
  -1   5  -7   42.02    2.02
  -1   5  -7   40.71    1.91
  -1  -5  -7   40.93    1.83
   1  -5   7   40.52    1.76
  -1  -5  -7   39.37    1.94
  -2  -5  -7    0.05    0.75
  -2   5  -7    0.38    0.47
  -2   5  -7    0.16    0.57
  -2  -5  -7    0.62    0.47
  -2  -5  -7    0.28    0.57
  -2   5  -7    0.31    0.73
  -2  -5  -7   -0.04    0.56
  -2   5  -7   -0.04    0.56
  -3  -5  -7   51.98    2.22
  -3   5  -7   49.44    2.18
  -3   5  -7   47.30    2.26
  -3  -5  -7   48.55    2.37
  -3   5  -7   45.69    2.33
  -3  -5  -7   52.47    2.45
  -3   5  -7   52.39    2.47
  -4   5  -7    0.79    0.48
  -4  -5  -7    0.87    0.58
  -4  -5  -7    1.10    0.69
  -4   5  -7    0.78    0.64
  -4   5  -7    0.41    0.76
  -4  -5  -7    0.65    0.79
  -5   5  -7   50.21    2.44
  -5  -5  -7   51.18    2.26
  -5  -5  -7   49.51    2.39
  -5   5  -7   49.23    2.39
  -5   5  -7   46.54    2.10
  -6   5  -7   21.44    1.18
   6   5   7   22.51    1.37
   6  -5   7   21.13    1.34
  -6   5  -7   22.78    1.43
  -6  -5  -7   21.39    1.53
  -6  -5  -7   21.65    1.38
   7   5   7   36.62    1.74
   7  -5   7   35.24    1.72
  -7   5  -7   35.63    1.72
  -7  -5  -7   38.38    1.91
  -7  -5  -7   33.53    1.65
  -8  -5  -7   53.57    1.95
  -8  -5  -7   50.13    2.01
   8   5   7   40.09    1.81
   8  -5   7   41.50    1.82
  -8  -6   7   34.63    1.50
   8   6  -7   34.22    1.51
  -7   6   7   28.68    1.49
   7   6  -7   32.70    1.58
  -7  -6   7   33.07    1.56
   7  -6  -7   30.91    1.50
  -6   6   7    5.38    0.78
   6  -6  -7    5.24    0.70
   6   6  -7    4.06    0.65
  -5   6   7   21.11    1.32
   5  -6  -7   20.19    1.33
   5   6  -7   17.80    1.28
   4  -6  -7   51.56    2.35
   4   6  -7   52.36    2.36
   4   6  -7   53.10    2.44
  -4   6   7   50.55    2.25
  -4  -6   7   54.42    2.40
   4   6  -7   47.52    2.23
   3   6  -7    5.58    0.74
   3  -6  -7    4.69    0.71
   3   6  -7    4.62    0.84
  -3   6   7    5.38    0.70
   3  -6  -7    4.66    0.65
  -3  -6   7    5.84    0.84
   3   6  -7    4.12    0.73
   2  -6  -7    5.20    0.74
   2   6  -7    5.26    0.73
   2   6  -7    4.78    0.78
  -2   6   7    4.48    0.60
   2  -6  -7    6.91    0.81
  -2  -6   7    5.14    0.76
   2   6  -7    5.71    0.84
   1  -6  -7    7.64    0.87
   1   6  -7    7.27    0.80
   1  -6  -7    6.71    0.78
   1  -6  -7    6.21    0.58
   1   6  -7    5.90    0.77
  -1  -6   7    6.67    0.80
   1   6  -7    6.57    0.91
   0  -6  -7   42.29    2.02
   0   6  -7   43.33    2.03
   0  -6  -7   42.21    1.82
   0   6  -7   39.80    1.96
   0  -6  -7   42.20    2.15
   0  -6   7   44.88    1.96
   0  -6  -7   41.18    1.89
   0   6  -7   42.95    2.19
  -1  -6  -7    4.93    0.86
  -1  -6  -7    4.78    0.60
   1  -6   7    5.85    0.62
  -1   6  -7    4.49    0.69
  -1  -6  -7    4.98    0.73
  -1   6  -7    3.80    0.69
  -1  -6  -7    4.56    0.69
  -2  -6  -7   23.90    1.32
  -2   6  -7   23.55    1.36
  -2  -6  -7   24.08    1.50
  -2   6  -7   23.02    1.47
  -2   6  -7   25.12    1.67
  -2  -6  -7   25.14    1.52
  -3   6  -7    3.20    0.61
  -3   6  -7    3.35    0.66
  -3  -6  -7    3.17    0.59
  -3  -6  -7    3.05    0.76
  -3   6  -7    3.03    0.84
  -3  -6  -7    3.09    0.68
  -3   6  -7    3.51    0.70
  -4   6  -7    9.61    1.08
  -4  -6  -7   10.03    1.10
  -4   6  -7    8.85    0.82
  -4  -6  -7   10.28    0.92
  -4  -6  -7    8.68    0.96
  -4   6  -7   11.19    1.02
  -5   6  -7   79.54    3.01
  -5  -6  -7   80.72    3.17
  -5   6  -7   78.30    3.32
  -6  -6  -7    0.47    0.69
  -6   6  -7    0.76    0.55
  -6  -6  -7    0.63    0.54
   6   6   7    0.65    0.46
   6  -6   7    0.23    0.43
  -6  -6  -7    0.32    0.52
  -7  -6  -7    0.81    0.58
  -7   6  -7    0.22    0.40
   7   6   7   -0.03    0.38
   7  -6   7    1.03    0.41
  -7  -6  -7    1.45    0.44
  -8  -6  -7    3.99    0.58
  -8  -7   7   20.21    1.01
   8   7  -7   22.51    1.08
  -7  -7   7    0.53    0.45
  -7   7   7   -0.20    0.47
   7  -7  -7    0.45    0.33
  -6   7   7    0.03    0.53
   6  -7  -7   -0.06    0.39
   6   7  -7   -0.06    0.38
  -5  -7   7    0.44    0.64
  -5   7   7    0.13    0.56
   5   7  -7    0.53    0.62
   5  -7  -7    0.20    0.44
   5   7  -7    0.07    0.44
   4  -7  -7   37.24    1.82
   4   7  -7   34.50    1.79
  -4   7   7   37.77    1.79
   4   7  -7   37.90    1.96
  -4  -7   7   37.28    1.91
   4   7  -7   32.32    1.78
   3  -7  -7   10.28    0.91
   3   7  -7    9.16    0.87
  -3   7   7    9.66    0.83
  -3  -7   7    8.01    0.96
   3   7  -7    8.69    0.97
   3   7  -7    9.73    1.02
   2  -7  -7    9.61    0.87
   2   7  -7    9.03    0.86
  -2  -7   7    8.20    0.89
   2   7  -7    9.89    1.05
   2   7  -7    9.10    0.95
   1  -7  -7   41.04    1.93
   1   7  -7   40.37    1.93
   1   7  -7   39.92    1.96
  -1  -7   7   40.33    1.95
   1   7  -7   39.50    2.13
   0  -7  -7    4.66    0.69
   0   7  -7    4.96    0.68
   0   7  -7    4.72    0.73
   0  -7  -7    3.92    0.55
   0  -7  -7    4.21    0.50
   0  -7   7    4.74    0.70
   0   7  -7    5.18    0.94
  -1  -7  -7   11.95    1.01
  -1   7  -7   11.99    1.00
   1  -7   7   13.41    0.95
  -1   7  -7   10.74    0.95
  -1  -7  -7   12.59    0.86
  -1  -7  -7   12.17    0.99
  -2   7  -7   38.05    1.82
  -2  -7  -7   38.64    1.77
  -2  -7  -7   39.25    1.94
  -2   7  -7   38.31    1.92
  -2  -7  -7   38.89    1.97
  -2   7  -7   39.56    2.17
  -3   7  -7  499.02   16.70
  -3  -7  -7  531.15   16.92
  -3   7  -7  548.55   17.05
  -3  -7  -7  538.21   16.66
  -3  -7  -7  528.35   16.83
  -3   7  -7  529.50   16.82
  -3   7  -7  537.60   16.64
  -4   7  -7    5.56    0.64
  -4  -7  -7    5.46    0.71
  -4   7  -7    6.61    0.97
  -4  -7  -7    5.46    0.89
  -4  -7  -7    6.11    0.78
  -4   7  -7    5.87    0.74
  -5  -7  -7   40.36    1.82
  -5  -7  -7   35.50    1.96
   5   7   7   31.99    1.70
   5  -7   7   34.61    1.73
  -5   7  -7   40.84    1.99
  -6  -7  -7    1.22    0.52
  -6  -7  -7    1.88    0.70
  -6   7  -7    1.25    0.54
  -6  -7  -7    1.85    0.62
   6   7   7    1.50    0.44
   6  -7   7    1.69    0.45
  -7  -7  -7    1.10    0.45
  -7  -7  -7    1.82    0.56
  -7  -7  -7    0.92    0.42
   7  -7   7    0.68    0.32
  -8  -7  -7   28.53    1.36
  -8  -7  -7   29.36    1.29
  -7  -8   7   11.89    0.82
  -7   8   7   12.34    0.84
  -6   8   7    0.31    0.50
   6   8  -7    0.52    0.57
  -5  -8   7    4.62    0.79
  -5   8   7    3.84    0.67
   5   8  -7    4.30    0.79
   5  -8  -7    3.48    0.55
  -4   8   7    2.20    0.58
   4   8  -7    2.47    0.73
   4  -8  -7    2.44    0.52
  -4  -8   7    3.09    0.76
   4   8  -7    3.27    0.66
   3  -8  -7   33.93    1.61
  -3   8   7   29.17    1.51
  -3  -8   7   34.37    1.79
   3   8  -7   26.96    1.67
   3   8  -7   30.30    1.73
   2  -8  -7   49.49    2.15
  -2  -8   7   50.20    2.28
   2   8  -7   44.22    2.33
   2   8  -7   48.28    2.26
   1  -8  -7   10.78    0.88
  -1  -8   7    9.84    0.93
   1   8  -7    9.99    1.12
   1   8  -7    8.95    0.92
   0   8  -7   63.49    2.66
   0  -8   7   62.94    2.64
   0  -8  -7   64.00    2.65
  -1   8  -7    2.00    0.53
  -1  -8  -7    1.58    0.50
  -1  -8  -7    0.92    0.47
  -1  -8  -7    0.84    0.36
   1  -8   7    1.39    0.50
  -1   8  -7    1.00    0.82
  -2  -8  -7  182.02    6.28
  -2  -8  -7  186.58    6.12
  -2   8  -7  177.79    6.17
  -2   8  -7  194.89    6.64
  -2  -8  -7  187.23    6.39
   2  -8   7  173.04    6.08
  -3   8  -7    3.22    0.53
  -3  -8  -7    3.67    0.57
  -3  -8  -7    4.49    0.79
  -3  -8  -7    3.35    0.59
  -3   8  -7    3.91    0.90
  -4  -8  -7   31.40    1.54
  -4   8  -7   29.23    1.76
  -4  -8  -7   29.09    1.76
   5  -8   7    7.31    0.69
  -5  -8  -7    8.39    0.78
  -5  -8  -7    7.13    1.00
  -5  -8  -7    9.80    1.03
  -5   8  -7    9.81    0.97
  -6  -8  -7   26.19    1.33
  -6  -8  -7   23.76    1.42
  -6   8  -7   23.15    1.34
  -7  -8  -7   11.36    0.81
  -7  -8  -7   11.67    0.79
  -7  -8  -7   11.40    0.92
  -7  -9   7    0.63    0.35
   7   9  -7    0.81    0.39
  -7   9   7    0.86    0.37
   6   9  -7    3.53    0.63
  -6   9   7    4.15    0.59
  -5  -9   7   22.99    1.34
   5   9  -7   21.58    1.36
  -5   9   7   20.79    1.22
   4   9  -7    0.84    0.62
   4   9  -7    1.00    0.54
  -4  -9   7    1.76    0.68
  -4   9   7    2.14    0.55
   3   9  -7    3.47    0.73
   3   9  -7    3.39    0.74
  -3  -9   7    4.75    0.78
  -3   9   7    3.84    0.58
   2   9  -7   39.18    1.98
  -2  -9   7   41.11    2.03
   2   9  -7   41.16    2.17
   1   9  -7   59.60    2.63
  -1  -9   7   65.71    2.70
   1   9  -7   63.27    2.94
   0  -9   7  182.65    6.17
   0   9  -7  173.55    6.11
  -1   9  -7  129.27    4.59
  -1   9  -7  140.91    5.06
   1  -9   7  132.38    4.62
  -2  -9  -7   18.91    1.25
  -2   9  -7   20.77    1.50
  -2  -9  -7   17.14    1.00
  -2   9  -7   18.22    1.09
  -3  -9  -7    7.03    0.87
  -3  -9  -7    6.15    0.63
  -3   9  -7    8.13    1.05
  -4  -9  -7    1.71    0.45
  -4  -9  -7    1.62    0.64
  -4   9  -7    1.04    0.66
  -4  -9  -7    2.07    0.75
  -5  -9  -7    4.81    0.61
  -5  -9  -7    6.27    0.85
  -5   9  -7    6.70    0.79
  -5  -9  -7    4.86    0.83
  -6  -9  -7    6.04    0.59
  -6   9  -7    4.60    0.58
  -6  -9  -7    5.67    0.72
  -7  -9  -7    2.64    0.40
  -7  -9  -7    2.91    0.45
  -7  -9  -7    2.31    0.53
  -6 -10   7    9.29    0.74
   6  10  -7    9.25    0.79
  -6  10   7    9.79    0.72
   5  10  -7    1.36    0.40
   5  10  -7    1.87    0.55
  -5  10   7    1.94    0.48
   4  10  -7   11.68    1.00
   4  10  -7   10.36    0.96
  -4 -10   7   11.70    1.02
  -4  10   7   11.43    0.85
   3  10  -7  109.79    4.02
  -3 -10   7  109.27    4.03
   3  10  -7   99.20    4.07
   2  10  -7   11.08    0.97
  -2 -10   7   10.34    1.00
   2  10  -7    9.62    1.09
   1  10  -7   46.57    2.11
   1  10  -7   44.12    2.35
   0 -10   7   30.91    1.63
   0  10  -7   30.60    1.55
  -1  10  -7   36.11    1.63
   1 -10   7   33.89    1.68
  -1  10  -7   39.39    2.10
  -2 -10  -7   -0.03    0.46
  -2  10  -7    0.05    0.76
  -3 -10  -7   16.91    1.21
  -3  10  -7   16.67    1.30
  -4 -10  -7    2.07    0.43
  -4  10  -7    2.70    0.67
  -4 -10  -7    3.15    0.67
  -4 -10  -7    2.07    0.70
  -5 -10  -7    5.09    0.54
  -5 -10  -7    6.45    0.79
  -5  10  -7    5.65    0.70
  -5 -10  -7    7.67    0.85
  -6 -10  -7    0.42    0.28
  -6 -10  -7   -0.03    0.43
  -6 -10  -7    0.26    0.45
  -6 -11   7    1.54    0.39
  -6  11   7    1.52    0.36
   6  11  -7    2.17    0.43
  -5  11   7    4.65    0.53
   5  11  -7    4.14    0.60
  -4  11   7    1.10    0.40
   4  11  -7    1.37    0.54
  -4 -11   7    2.03    0.60
   4  11  -7    1.01    0.50
   3  11  -7   -0.16    0.58
   3  11  -7    1.15    0.52
   2  11  -7   69.69    3.10
  -2 -11   7   74.02    2.94
   2  11  -7   70.37    2.85
   1  11  -7    0.68    0.44
   1 -11  -7    0.03    0.41
  -1 -11   7    0.24    0.60
   0 -11  -7   15.30    1.12
   0  11  -7   16.16    1.39
   0 -11   7   16.68    1.14
   0  11  -7   15.55    0.99
  -1  11  -7    5.67    0.97
  -1 -11  -7    5.65    0.81
  -2 -11  -7    0.09    0.41
  -2  11  -7    0.22    0.69
  -2 -11  -7    0.68    0.59
  -3 -11  -7    0.23    0.48
  -3  11  -7    1.08    0.66
  -3 -11  -7    0.55    0.64
  -4  11  -7    2.43    0.61
  -4 -11  -7    1.28    0.55
  -5 -11  -7   14.74    1.03
  -5  11  -7   12.11    0.88
  -5 -11  -7   13.44    1.02
  -6 -11  -7    1.97    0.46
  -6 -11  -7    1.61    0.45
   5  12  -7   10.20    0.72
   4  12  -7   40.76    1.75
  -4 -12   7   42.45    1.82
   4  12  -7   37.25    1.81
   3  12  -7    2.65    0.51
  -3 -12   7    3.43    0.62
   3  12  -7    2.27    0.66
   2  12  -7    0.81    0.41
  -2 -12   7    0.60    0.54
   2  12  -7    0.08    0.64
  -1 -12   7   49.64    2.18
   1  12  -7   48.29    2.00
   0  12  -7   15.24    1.26
   0 -12   7   14.15    0.99
  -1  12  -7   38.86    1.99
  -1 -12  -7   33.66    1.77
  -2 -12  -7    2.03    0.62
  -2  12  -7    2.50    0.71
  -3  12  -7   17.13    1.15
  -3 -12  -7   15.66    1.13
  -4  12  -7    2.65    0.54
  -4 -12  -7    1.97    0.49
  -5 -12  -7    0.51    0.42
  -5 -12  -7    0.05    0.33
   4  13  -7    2.26    0.38
   4  13  -7    2.72    0.50
   3  13  -7    9.18    0.67
  -3 -13   7   10.26    0.81
   3  13  -7   10.61    0.91
  -2 -13   7    9.05    0.79
   2  13  -7    9.14    0.94
  -1 -13   7    0.78    0.52
   0 -13  -7   10.68    0.78
   0  13  -7   15.87    1.23
  -1 -13  -7   78.60    3.06
  -1  13  -7   85.85    3.35
  -2 -13  -7   10.98    0.89
  -2  13  -7   12.17    1.01
  -3  13  -7    1.85    0.53
  -3 -13  -7    1.38    0.36
  -3 -13  -7    2.63    0.56
  -4  13  -7    2.07    0.42
  -4 -13  -7    1.27    0.38
   3  14  -7    1.10    0.44
   2  14  -7    1.22    0.52
   1  14  -7   10.80    0.98
   0  14  -7    1.13    0.61
  -1 -14  -7    8.11    0.65
  -1  14  -7   13.34    0.98
  -2 -14  -7   17.54    1.01
  -2  14  -7   19.01    1.14
  -3 -14  -7    1.51    0.39
  -3  14  -7    1.40    0.41
   1  15  -7    1.18    0.47
   0  15  -7   10.61    0.84
  -1  15  -7    1.26    0.44
   8   0  -8   45.49    1.90
  -8   0   8   45.10    1.81
  -7   0   8    0.19    0.46
   7   0  -8    1.14    0.55
  -6   0   8   20.52    1.26
   6   0  -8   18.02    1.07
   6   0  -8   19.26    1.35
   5   0  -8   76.34    3.21
  -5   0   8   84.49    3.24
   5   0  -8   80.56    3.13
   5   0  -8   83.58    3.39
   4   0  -8 1069.22   32.55
  -4   0   8 1033.58   32.31
   4   0  -8 1040.60   32.31
   4   0  -8 1056.95   32.55
   3   0  -8    0.55    0.67
   3   0  -8    0.51    0.68
   3   0  -8   -0.14    0.56
  -3   0   8    0.43    0.50
   2   0  -8    6.56    0.96
   2   0  -8    5.08    0.89
   2   0  -8    7.08    0.82
  -2   0   8    5.82    0.68
   1   0  -8    0.35    0.44
   1   0  -8    0.21    0.69
   1   0  -8    0.24    0.53
   0   0  -8   74.14    3.01
   0   0  -8   73.48    3.16
   0   0  -8   75.25    3.11
   0   0  -8   75.67    3.31
  -1   0  -8   73.97    3.21
  -1   0  -8   75.24    3.18
  -1   0  -8   77.77    3.34
  -2   0  -8    1.17    0.72
  -2   0  -8    0.11    0.61
  -2   0  -8    0.23    0.75
  -3   0  -8   10.36    1.17
  -3   0  -8   10.73    1.01
  -3   0  -8   10.80    1.10
  -4   0  -8   47.80    2.50
  -4   0  -8   49.23    2.27
  -4   0  -8   51.60    2.43
  -5   0  -8   12.74    1.03
  -5   0  -8   11.17    1.19
  -5   0  -8   12.71    1.22
  -6   0  -8   19.88    1.25
  -6   0  -8   23.81    1.50
  -7   0  -8  181.11    5.98
   7   0   8  173.33    6.09
  -7   0  -8  182.88    6.15
   8   0   8    6.85    0.62
  -8   0  -8    7.60    0.55
  -8   1   8   10.43    0.71
  -8  -1   8    9.15    0.70
   8   1  -8   11.03    0.79
  -7  -1   8   52.77    2.10
   7   1  -8   54.22    2.23
  -7   1   8   59.00    2.15
   6   1  -8   10.35    0.84
  -6   1   8   10.46    0.91
  -6  -1   8   10.89    0.94
   6  -1  -8    9.45    1.01
   6   1  -8   10.36    1.03
   5   1  -8   89.92    3.38
   5  -1  -8   83.61    3.24
  -5   1   8   93.12    3.43
  -5  -1   8   90.88    3.44
   5  -1  -8   87.88    3.59
   5   1  -8   88.15    3.58
   5   1  -8   90.19    3.50
   5  -1  -8   78.83    3.30
   4  -1  -8    1.48    0.60
  -4   1   8    0.92    0.60
  -4  -1   8    1.85    0.67
   4   1  -8    1.15    0.58
   4  -1  -8    0.90    0.71
   4   1  -8    1.03    0.71
   4  -1  -8    1.52    0.52
   3   1  -8   11.85    1.04
   3  -1  -8   13.19    1.00
  -3   1   8   12.04    0.96
   3  -1  -8   12.90    1.16
  -3  -1   8   12.43    1.00
   3  -1  -8   10.96    1.15
   3   1  -8   12.80    1.19
   2  -1  -8   16.14    1.33
   2   1  -8   17.10    1.36
   2   1  -8   18.64    1.25
   2  -1  -8   19.96    1.24
  -2   1   8   16.96    1.08
   2  -1  -8   20.87    1.48
  -2  -1   8   18.78    1.15
   2   1  -8   17.40    1.12
   1  -1  -8   45.66    2.26
   1   1  -8   46.65    2.27
   1  -1  -8   44.76    2.37
   1   1  -8   47.42    2.17
   1  -1  -8   47.34    2.11
  -1  -1   8   42.75    1.91
   1  -1  -8   45.18    2.06
   1   1  -8   46.18    2.14
   0  -1  -8  186.72    6.44
   0   1  -8  185.81    6.73
   0  -1  -8  185.80    6.63
   0   1  -8  189.15    6.64
   0   1  -8  189.10    6.59
   0  -1  -8  191.87    6.54
  -1   1  -8    1.48    0.64
  -1  -1  -8    1.39    0.57
  -1   1  -8    0.90    0.67
  -1  -1  -8    1.77    0.79
  -1   1  -8    0.69    0.62
  -1  -1  -8    1.95    0.65
  -1  -1  -8    3.06    0.80
  -1   1  -8    2.07    0.73
  -2   1  -8   35.03    1.79
  -2   1  -8   31.99    1.93
  -2  -1  -8   35.12    1.97
  -2  -1  -8   30.38    1.92
  -2   1  -8   33.55    1.96
  -2  -1  -8   37.20    1.94
  -2   1  -8   32.45    1.91
  -3   1  -8    2.70    0.73
  -3   1  -8    2.07    0.70
  -3  -1  -8    2.54    0.78
  -3  -1  -8    3.10    0.84
  -3  -1  -8    3.68    0.93
  -3   1  -8    1.64    0.82
  -4   1  -8    1.10    0.60
  -4  -1  -8    0.45    0.63
  -4   1  -8    0.57    0.63
  -4  -1  -8    1.05    0.65
  -4   1  -8   -0.05    0.76
  -4  -1  -8    0.54    0.77
  -4   1  -8    0.39    0.75
  -5   1  -8    0.94    0.57
  -5  -1  -8    0.97    0.61
  -5  -1  -8    0.14    0.72
  -5   1  -8    0.55    0.68
  -5   1  -8    0.14    0.74
  -5  -1  -8    0.84    0.73
  -6   1  -8   34.47    1.84
  -6  -1  -8   34.02    1.86
  -6   1  -8   30.54    1.57
  -6  -1  -8   31.70    1.62
   7   1   8    2.07    0.56
  -7   1  -8    1.14    0.43
  -7  -1  -8    1.44    0.45
  -7   1  -8    1.63    0.53
  -7  -1  -8    0.82    0.54
   8   1   8   13.86    0.87
  -8  -1  -8   12.29    0.82
  -8  -1  -8   14.00    0.78
   8  -2  -8    9.48    0.74
   8   2  -8    9.31    0.73
  -8   2   8   11.68    0.73
  -7   2   8    0.53    0.45
  -7  -2   8    1.04    0.49
   7   2  -8    0.19    0.33
   7   2  -8    0.96    0.51
  -6   2   8    0.41    0.55
  -6  -2   8    0.19    0.52
   6   2  -8    1.01    0.57
   6   2  -8    0.26    0.43
   6   2  -8    0.41    0.40
   5   2  -8   17.72    1.20
   5  -2  -8   16.91    1.01
  -5  -2   8   19.79    1.27
   5   2  -8   18.24    1.33
   4   2  -8   50.34    2.31
   4  -2  -8   48.74    2.14
  -4  -2   8   52.51    2.31
   4   2  -8   51.94    2.46
   4  -2  -8   51.43    2.35
   3  -2  -8    5.49    0.82
  -3  -2   8    3.09    0.66
   3   2  -8    2.81    0.71
   3   2  -8    4.15    0.83
   3  -2  -8    3.64    0.61
   2  -2  -8    5.92    0.91
   2   2  -8    5.38    0.70
  -2   2   8    4.84    0.61
  -2  -2   8    5.45    0.68
   2   2  -8    7.13    0.87
   2  -2  -8    5.96    0.70
   2   2  -8    5.09    0.90
   1  -2  -8    3.78    0.84
   1  -2  -8    3.72    0.63
   1   2  -8    2.96    0.64
   1  -2  -8    3.18    0.54
  -1  -2   8    3.57    0.56
   1   2  -8    3.60    0.79
   0   2  -8   99.08    3.72
   0  -2  -8   95.78    3.65
   0   2  -8   92.88    3.82
   0  -2  -8   96.18    3.71
   0   2  -8   96.60    3.81
   0   2  -8   97.84    3.97
  -1   2  -8  110.25    4.18
  -1  -2  -8  112.28    4.15
  -1   2  -8  112.23    4.35
  -1  -2  -8  113.35    4.29
  -1   2  -8  110.59    4.35
  -1   2  -8  114.21    4.45
  -1  -2  -8  116.11    4.48
  -2   2  -8   44.61    2.14
  -2  -2  -8   44.39    2.11
  -2   2  -8   42.51    2.28
  -2  -2  -8   49.05    2.32
  -2   2  -8   45.15    2.31
  -2  -2  -8   46.03    2.37
  -2   2  -8   48.08    2.38
  -3   2  -8   27.46    1.55
  -3  -2  -8   25.52    1.71
  -3   2  -8   27.08    1.67
  -3   2  -8   25.15    1.70
  -3  -2  -8   25.86    1.71
  -4   2  -8    3.66    0.70
  -4   2  -8    3.25    0.69
  -4   2  -8    3.87    0.94
  -4   2  -8    3.48    0.85
  -5   2  -8    4.69    0.72
  -5  -2  -8    4.37    0.75
  -5   2  -8    4.05    0.86
  -5  -2  -8    4.12    0.91
  -5   2  -8    5.07    0.88
  -6   2  -8    2.80    0.54
  -6  -2  -8    2.64    0.63
  -6   2  -8    3.97    0.77
  -6  -2  -8    3.53    0.77
  -7   2  -8   13.73    0.84
  -7  -2  -8   14.31    0.93
  -7  -2  -8   13.56    1.03
  -7   2  -8   12.71    0.97
   7   2   8   12.78    0.97
   7  -2   8   11.22    0.94
  -8  -2  -8    9.42    0.63
   8   2   8    9.90    0.70
   8  -2   8    7.89    0.66
  -8  -2  -8    7.97    0.66
   7   3  -8    7.74    0.68
  -7   3   8   10.07    0.79
  -7  -3   8    9.87    0.80
   7  -3  -8    9.22    0.82
   7   3  -8    9.94    0.84
   6   3  -8   77.35    2.97
  -6  -3   8   81.96    3.03
   6  -3  -8   73.27    3.07
   6   3  -8   78.85    3.11
   5   3  -8   55.59    2.43
  -5  -3   8   54.85    2.43
   5  -3  -8   54.97    2.52
   5   3  -8   54.73    2.53
   4   3  -8   97.39    3.72
   4  -3  -8   88.63    3.39
  -4  -3   8  100.31    3.71
   4  -3  -8   92.19    3.78
   4   3  -8   96.74    3.82
   4  -3  -8   98.24    3.68
   3   3  -8   17.32    1.25
   3  -3  -8   16.24    1.03
   3  -3  -8   16.31    1.25
  -3  -3   8   16.41    1.16
   3  -3  -8   14.98    1.26
   3   3  -8   16.35    1.28
   2  -3  -8   83.20    3.41
   2   3  -8   84.90    3.43
   2  -3  -8   86.69    3.18
  -2   3   8   79.33    3.05
   2  -3  -8   85.45    3.48
  -2  -3   8   77.77    3.17
   2   3  -8   82.59    3.26
   1  -3  -8   47.17    2.28
   1   3  -8   46.50    2.27
   1  -3  -8   49.79    2.40
  -1  -3   8   44.84    2.01
   1   3  -8   45.52    2.17
   1  -3  -8   45.85    2.05
   1   3  -8   45.66    2.21
   0   3  -8   16.74    1.24
   0  -3  -8   18.66    1.18
   0  -3  -8   17.76    1.31
   0   3  -8   18.36    1.33
   0  -3  -8   17.68    1.17
   0   3  -8   16.32    1.27
  -1   3  -8   91.66    3.60
  -1  -3  -8   91.99    3.55
  -1  -3  -8   92.02    3.77
  -1   3  -8   96.59    3.80
  -1  -3  -8   94.22    3.70
  -1   3  -8   90.44    3.79
  -1  -3  -8   97.50    3.92
  -1   3  -8   93.66    3.85
  -2  -3  -8   11.81    1.10
  -2   3  -8   12.67    1.05
  -2  -3  -8    9.72    1.07
  -2   3  -8   11.16    1.12
  -2  -3  -8   14.32    1.07
  -2   3  -8   11.77    1.14
  -2  -3  -8   11.97    1.27
  -3  -3  -8   80.69    3.20
  -3   3  -8   75.15    3.13
  -3  -3  -8   77.90    3.41
  -3   3  -8   77.67    3.38
  -3  -3  -8   82.24    3.43
  -3  -3  -8   85.44    3.48
  -3   3  -8   78.13    3.31
  -4   3  -8  129.08    4.58
  -4  -3  -8  124.14    4.84
  -4   3  -8  128.59    4.85
  -4   3  -8  121.63    4.62
  -5   3  -8   11.08    1.13
  -5   3  -8   10.90    1.07
  -5   3  -8   12.87    0.96
  -5  -3  -8    9.25    1.07
  -6   3  -8   12.87    0.90
  -6  -3  -8   13.66    1.00
  -6  -3  -8   10.42    0.90
   6   3   8   13.37    1.05
   6  -3   8   12.54    1.03
  -6  -3  -8   14.94    1.20
  -6   3  -8   13.37    1.11
  -7  -3  -8    7.85    0.69
  -7   3  -8    6.69    0.58
   7   3   8    6.24    0.69
   7  -3   8    5.10    0.67
  -7   3  -8    7.21    0.74
  -7  -3  -8    7.73    0.80
   7   4  -8    2.08    0.46
   7  -4  -8    2.19    0.49
   7   4  -8    2.67    0.53
  -7   4   8    4.20    0.55
  -7  -4   8    3.62    0.56
   6  -4  -8    1.50    0.56
   6   4  -8    1.66    0.58
   6   4  -8    2.06    0.55
  -6  -4   8    2.32    0.61
   5   4  -8    9.08    0.92
   5  -4  -8    8.72    0.95
  -5  -4   8   10.02    0.96
   5   4  -8    9.90    0.99
  -4   4   8   55.07    2.34
   4  -4  -8   53.77    2.35
  -4  -4   8   58.76    2.50
   4  -4  -8   55.38    2.54
   4   4  -8   55.26    2.56
   3  -4  -8    5.76    0.80
   3  -4  -8    6.54    0.89
   3   4  -8    6.67    0.87
   3  -4  -8    6.20    0.61
  -3  -4   8    8.42    0.88
   3   4  -8    5.64    0.67
   2  -4  -8   85.19    3.53
   2   4  -8   89.26    3.57
   2  -4  -8   84.94    3.55
   2   4  -8   92.11    3.52
   2  -4  -8   85.06    3.24
  -2  -4   8   88.20    3.38
   2   4  -8   86.08    3.44
   1  -4  -8    5.15    0.63
   1  -4  -8    4.43    0.85
   1  -4  -8    3.49    0.75
   1   4  -8    3.54    0.76
   1   4  -8    4.79    0.80
  -1  -4   8    4.33    0.63
   1   4  -8    4.75    0.78
   0  -4  -8   97.40    3.72
   0   4  -8   95.39    3.70
   0  -4  -8   97.33    3.84
   0   4  -8   86.63    3.52
   0  -4  -8   91.79    3.43
   0  -4   8   86.01    3.30
   0  -4  -8   84.14    3.43
   0   4  -8   94.16    3.72
  -1   4  -8  102.87    3.95
  -1  -4  -8  107.18    3.92
  -1   4  -8  105.89    4.21
  -1  -4  -8  103.67    4.13
  -1   4  -8  104.45    4.13
  -1  -4  -8  106.18    4.04
  -1   4  -8  107.86    4.22
  -2  -4  -8    6.19    1.09
  -2   4  -8    6.96    0.85
  -2   4  -8    5.67    0.90
  -2  -4  -8    6.78    0.79
  -2  -4  -8    5.61    0.85
  -2  -4  -8    6.18    0.94
  -2   4  -8    7.29    0.95
  -3  -4  -8   91.04    3.52
  -3   4  -8   88.91    3.51
  -3  -4  -8   91.74    3.76
  -3   4  -8   88.85    3.73
  -3  -4  -8   90.94    3.74
  -3   4  -8   95.51    3.83
  -3   4  -8   92.93    3.66
  -4   4  -8   38.88    1.94
  -4   4  -8   39.41    1.90
  -4  -4  -8   39.72    2.14
  -4   4  -8   40.17    2.13
  -4  -4  -8   41.06    1.97
  -4  -4  -8   44.46    2.23
  -4   4  -8   42.23    2.24
  -5  -4  -8   16.86    1.29
  -5   4  -8   17.13    1.29
  -5   4  -8   16.04    1.07
  -5   4  -8   18.25    1.36
  -6   4  -8    0.24    0.35
  -6   4  -8    0.29    0.58
  -6  -4  -8   -0.04    0.62
  -6  -4  -8    0.19    0.45
   6   4   8    0.30    0.50
   6  -4   8   -0.16    0.48
  -7  -4  -8   16.74    0.97
   7   4   8   14.22    0.96
   7  -4   8   13.77    0.95
  -7   4  -8   15.26    0.98
[truncated: 43,387 more chars]
