# Supplementary material for: Pentaborate(1-) Salts and a Tetraborate(2-) Salt Derived from C2- or C3-Linked Bis(alkylammonium) Dications: Synthesis, Characterization, and Structural (XRD) Studies
Source: Molecules. 2019 Dec 23;25(1):53. doi: 10.3390/molecules25010053 (PMC6982793; doi:10.3390/molecules25010053)
Supplement: Supplementary file 1 [file molecules-25-00053-s001.zip › MAB8.cif]

data_MAB8

#2018ncs0033

_audit_creation_date               2019-11-25
_audit_creation_method
;
Olex2 1.3
(compiled 2019.09.11 svn.r3662 for OlexSys, GUI svn.r5938)
;
_shelx_SHELXL_version_number       '2018/3'
loop_
  _audit_author_name
  _audit_author_email
  _audit_author_address
 'Beckett, M.A.' ''
;
Bangor University
School of Chemistry
Bangor
LL57 2UW
UK
;
 'Horton, P.N.' pnh@soton.ac.uk
;
University of Southampton
Chemistry
Southampton
SO17 1BJ
UK
;

_audit_contact_author_address      ?
_audit_contact_author_email        ?
_audit_contact_author_name         ''
_audit_contact_author_phone        ?
_publ_contact_author_id_orcid      ?
_publ_section_references
;
Dolomanov, O.V., Bourhis, L.J., Gildea, R.J, Howard, J.A.K. & Puschmann, H.
 (2009), J. Appl. Cryst. 42, 339-341.

Sheldrick, G.M. (2015). Acta Cryst. A71, 3-8.

Sheldrick, G.M. (2015). Acta Cryst. C71, 3-8.
;
_chemical_name_common              ?
_chemical_name_systematic          ?
_chemical_formula_moiety           'C9 H24 N2, 2(B5 H4 O10), 0.5(H2 O)'
_chemical_formula_sum              'C9 H33 B10 N2 O20.50'
_chemical_formula_weight           605.47
_chemical_melting_point            ?
_chemical_oxdiff_formula           'C9 H32 N2 B10 O20'
_chemical_oxdiff_usercomment       MAB/TAR/B5(3)
loop_
  _atom_type_symbol
  _atom_type_description
  _atom_type_scat_dispersion_real
  _atom_type_scat_dispersion_imag
  _atom_type_scat_source
 'C' 'C' 0.0033 0.0016 'International Tables Vol C Tables 4.2.6.8 and 6.1.1.4'
 'H' 'H' 0.0000 0.0000 'International Tables Vol C Tables 4.2.6.8 and 6.1.1.4'
 'B' 'B' 0.0013 0.0007 'International Tables Vol C Tables 4.2.6.8 and 6.1.1.4'
 'N' 'N' 0.0061 0.0033 'International Tables Vol C Tables 4.2.6.8 and 6.1.1.4'
 'O' 'O' 0.0106 0.0060 'International Tables Vol C Tables 4.2.6.8 and 6.1.1.4'

_shelx_space_group_comment
;
The symmetry employed for this shelxl refinement is uniquely defined
by the following loop, which should always be used as a source of
symmetry information in preference to the above space-group names.
They are only intended as comments.
;
_space_group_crystal_system        'monoclinic'
_space_group_IT_number             15
_space_group_name_H-M_alt          'C 1 2/c 1'
_space_group_name_Hall             '-C 2yc'
loop_
  _space_group_symop_operation_xyz
 'x, y, z'
 '-x, y, -z+1/2'
 'x+1/2, y+1/2, z'
 '-x+1/2, y+1/2, -z+1/2'
 '-x, -y, -z'
 'x, -y, z-1/2'
 '-x+1/2, -y+1/2, -z'
 'x+1/2, -y+1/2, z-1/2'

_cell_length_a                     26.8754(5)
_cell_length_b                     11.5269(2)
_cell_length_c                     17.9383(4)
_cell_angle_alpha                  90
_cell_angle_beta                   103.154(2)
_cell_angle_gamma                  90
_cell_volume                       5411.30(19)
_cell_formula_units_Z              8
_cell_measurement_reflns_used      13823
_cell_measurement_temperature      100(2)
_cell_measurement_theta_max        29.9610
_cell_measurement_theta_min        2.8770
_shelx_estimated_absorpt_T_max     0.995
_shelx_estimated_absorpt_T_min     0.966
_exptl_absorpt_coefficient_mu      0.132
_exptl_absorpt_correction_T_max    1.00000
_exptl_absorpt_correction_T_min    0.73203
_exptl_absorpt_correction_type     multi-scan
_exptl_absorpt_process_details
;
CrysAlisPro 1.171.40.53 (Rigaku Oxford Diffraction, 2019)
Empirical absorption correction using spherical harmonics,
 implemented in SCALE3 ABSPACK scaling algorithm.
;
_exptl_absorpt_special_details     ?
_exptl_crystal_colour              colourless
_exptl_crystal_colour_primary      colourless
_exptl_crystal_density_diffrn      1.486
_exptl_crystal_density_meas        ?
_exptl_crystal_density_method      ?
_exptl_crystal_description         blade
_exptl_crystal_F_000               2520
_exptl_crystal_recrystallization_method 
 'The material was recrystallised from water'
_exptl_crystal_size_max            0.26
_exptl_crystal_size_mid            0.14
_exptl_crystal_size_min            0.035
_exptl_transmission_factor_max     ?
_exptl_transmission_factor_min     ?
_diffrn_reflns_av_R_equivalents    0.0294
_diffrn_reflns_av_unetI/netI       0.0225
_diffrn_reflns_Laue_measured_fraction_full  0.999
_diffrn_reflns_Laue_measured_fraction_max  0.999
_diffrn_reflns_limit_h_max         34
_diffrn_reflns_limit_h_min         -31
_diffrn_reflns_limit_k_max         14
_diffrn_reflns_limit_k_min         -14
_diffrn_reflns_limit_l_max         22
_diffrn_reflns_limit_l_min         -23
_diffrn_reflns_number              31515
_diffrn_reflns_point_group_measured_fraction_full  0.999
_diffrn_reflns_point_group_measured_fraction_max  0.999
_diffrn_reflns_theta_full          25.242
_diffrn_reflns_theta_max           27.482
_diffrn_reflns_theta_min           2.332
_diffrn_ambient_environment        N~2~
_diffrn_ambient_temperature        100(2)
_diffrn_detector                   'CCD area detector'
_diffrn_detector_area_resol_mean   28.5714
_diffrn_detector_dtime             0.000
_diffrn_detector_type              'Rigaku HG Saturn724+ (2x2 bin mode)'
_diffrn_measured_fraction_theta_full  0.999
_diffrn_measured_fraction_theta_max  0.999
_diffrn_measurement_details
;
List of Runs (angles in degrees, time in seconds):

  # Type    Start    End  Width  t~exp~   \w     \q     \k     \f   Frames
--------------------------------------------------------------------------
  1  \w    -48.00  75.00   1.00    7.00    --  -13.50  72.00  60.00  123
  2  \w    -42.00  75.00   1.00    7.00    --  -13.50  38.00 -60.00  117
  3  \w    -48.00  75.00   1.00    7.00    --  -13.50  72.00 -30.00  123
  4  \w   -102.00 -21.00   1.00    7.00    --  -13.50 -57.00 -30.00   81
;
_diffrn_measurement_device         'four-circle \k goniometer'
_diffrn_measurement_device_details  'Rigaku, AFC12 \k goniometer'
_diffrn_measurement_device_type   
 'Rigaku FRE+ equipped with HF Varimax confocal mirrors and an AFC12 goniometer and HG Saturn 724+ detector'
_diffrn_measurement_method         'profile data from \w-scans'
_diffrn_measurement_specimen_support  'MiTeGen MicroLoop'
_diffrn_orient_matrix_type        
 'CrysAlisPro convention (1999,Acta A55,543-557)'
_diffrn_orient_matrix_UB_11        0.0132980000
_diffrn_orient_matrix_UB_12        0.0535951000
_diffrn_orient_matrix_UB_13        0.0039101000
_diffrn_orient_matrix_UB_21        0.0204159000
_diffrn_orient_matrix_UB_22        -0.0255144000
_diffrn_orient_matrix_UB_23        0.0271104000
_diffrn_orient_matrix_UB_31        0.0118348000
_diffrn_orient_matrix_UB_32        -0.0163289000
_diffrn_orient_matrix_UB_33        -0.0299872000
_diffrn_radiation_collimation      0.2
_diffrn_radiation_monochromator    'Confocal mirrors, HF Varimax'
_diffrn_radiation_probe            x-ray
_diffrn_radiation_type             'Mo K\a'
_diffrn_radiation_wavelength       0.71075
_diffrn_radiation_xray_symbol      K-L~3~
_diffrn_source                     'Rotating Anode'
_diffrn_source_current             55.0
_diffrn_source_power               2.475
_diffrn_source_target              Mo
_diffrn_source_type                'Rigaku FRE+'
_diffrn_source_voltage             45.0
_reflns_Friedel_coverage           0.000
_reflns_Friedel_fraction_full      .
_reflns_Friedel_fraction_max       .
_reflns_number_gt                  5188
_reflns_number_total               6191
_reflns_odcompleteness_completeness  99.86
_reflns_odcompleteness_iscentric   1
_reflns_odcompleteness_theta       27.42
_reflns_special_details
;
 Reflections were merged by SHELXL according to the crystal
 class for the calculation of statistics and refinement.
 
 _reflns_Friedel_fraction is defined as the number of unique
 Friedel pairs measured divided by the number that would be
 possible theoretically, ignoring centric projections and
 systematic absences.
;
_reflns_threshold_expression       'I > 2\s(I)'
_computing_cell_refinement         'CrysAlisPro 1.171.40.53 (Rigaku OD, 2019)'
_computing_data_collection         'CrysAlisPro 1.171.39.34b (Rigaku OD, 2017)'
_computing_data_reduction          'CrysAlisPro 1.171.40.53 (Rigaku OD, 2019)'
_computing_molecular_graphics      'Olex2 1.3 (Dolomanov et al., 2009)'
_computing_publication_material    'Olex2 1.3 (Dolomanov et al., 2009)'
_computing_structure_refinement    'ShelXL 2018/3 (Sheldrick, 2015)'
_computing_structure_solution      'SHELXT 2018/2 (Sheldrick, 2018)'
_refine_diff_density_max           0.295
_refine_diff_density_min           -0.219
_refine_diff_density_rms           0.044
_refine_ls_extinction_coef         .
_refine_ls_extinction_method       none
_refine_ls_goodness_of_fit_ref     1.029
_refine_ls_hydrogen_treatment      constr
_refine_ls_matrix_type             full
_refine_ls_number_parameters       409
_refine_ls_number_reflns           6191
_refine_ls_number_restraints       1
_refine_ls_R_factor_all            0.0447
_refine_ls_R_factor_gt             0.0351
_refine_ls_restrained_S_all        1.029
_refine_ls_shift/su_max            0.001
_refine_ls_shift/su_mean           0.000
_refine_ls_structure_factor_coef   Fsqd
_refine_ls_weighting_details      
 'w=1/[\s^2^(Fo^2^)+(0.0473P)^2^+2.2695P] where P=(Fo^2^+2Fc^2^)/3'
_refine_ls_weighting_scheme        calc
_refine_ls_wR_factor_gt            0.0863
_refine_ls_wR_factor_ref           0.0919
_refine_special_details            ?
_olex2_refinement_description
;
1. Fixed Uiso
 At 1.2 times of:
  All C(H,H) groups
 At 1.5 times of:
  All C(H,H,H) groups, All O(H) groups, All O(H,H) groups
2. Others
 Sof(O21)=Sof(H21A)=Sof(H21B)=0.5*(1-FVAR(2))
 Sof(O22)=Sof(H22A)=Sof(H22B)=0.5*FVAR(2)
3.a Free rotating group:
 O21(H21A,H21B), O22(H22A,H22B)
3.b Secondary CH2 refined with riding coordinates:
 C1(H1A,H1B), C2(H2A,H2B), C3(H3A,H3B)
3.c Idealised Me refined as rotating group:
 C4(H4A,H4B,H4C), C5(H5A,H5B,H5C), C6(H6A,H6B,H6C), C7(H7A,H7B,H7C), C8(H8A,
 H8B,H8C), C9(H9A,H9B,H9C)
3.d Idealised tetrahedral OH refined as rotating group:
 O17(H17), O18(H18), O19(H19), O20(H20), O7(H7), O8(H8), O9(H9), O10(H10)
;
_atom_sites_solution_hydrogens     mixed
_atom_sites_solution_primary       dual
_atom_sites_solution_secondary     ?
loop_
  _atom_site_label
  _atom_site_type_symbol
  _atom_site_fract_x
  _atom_site_fract_y
  _atom_site_fract_z
  _atom_site_U_iso_or_equiv
  _atom_site_adp_type
  _atom_site_occupancy
  _atom_site_site_symmetry_order
  _atom_site_calc_flag
  _atom_site_refinement_flags_posn
  _atom_site_refinement_flags_adp
  _atom_site_refinement_flags_occupancy
  _atom_site_disorder_assembly
  _atom_site_disorder_group
 N1 N 0.52700(3) 0.25442(8) 0.55943(5) 0.0172(2) Uani 1 1 d . . . . .
 N2 N 0.71802(4) 0.25306(8) 0.68508(5) 0.0180(2) Uani 1 1 d . . . . .
 C1 C 0.57692(4) 0.19290(10) 0.59215(7) 0.0181(2) Uani 1 1 d . . . . .
 H1A H 0.584278 0.139656 0.552706 0.022 Uiso 1 1 calc R U . . .
 H1B H 0.572637 0.144948 0.636051 0.022 Uiso 1 1 calc R U . . .
 C2 C 0.62298(4) 0.27227(10) 0.61894(6) 0.0181(2) Uani 1 1 d . . . . .
 H2A H 0.630886 0.314693 0.575057 0.022 Uiso 1 1 calc R U . . .
 H2B H 0.616185 0.329381 0.656633 0.022 Uiso 1 1 calc R U . . .
 C3 C 0.66722(4) 0.19293(10) 0.65557(7) 0.0188(2) Uani 1 1 d . . . . .
 H3A H 0.657916 0.151347 0.698738 0.023 Uiso 1 1 calc R U . . .
 H3B H 0.671584 0.134063 0.617375 0.023 Uiso 1 1 calc R U . . .
 C4 C 0.51156(4) 0.32974(11) 0.61857(7) 0.0234(3) Uani 1 1 d . . . . .
 H4A H 0.510569 0.283108 0.663895 0.035 Uiso 1 1 calc R U . . .
 H4B H 0.477643 0.362577 0.597498 0.035 Uiso 1 1 calc R U . . .
 H4C H 0.536392 0.392710 0.632956 0.035 Uiso 1 1 calc R U . . .
 C5 C 0.52998(5) 0.32695(11) 0.49119(7) 0.0224(3) Uani 1 1 d . . . . .
 H5A H 0.554643 0.389859 0.507084 0.034 Uiso 1 1 calc R U . . .
 H5B H 0.496266 0.359893 0.468878 0.034 Uiso 1 1 calc R U . . .
 H5C H 0.540982 0.278498 0.453018 0.034 Uiso 1 1 calc R U . . .
 C6 C 0.48707(4) 0.16230(10) 0.53465(7) 0.0213(2) Uani 1 1 d . . . . .
 H6A H 0.495935 0.115150 0.494096 0.032 Uiso 1 1 calc R U . . .
 H6B H 0.453738 0.199006 0.515285 0.032 Uiso 1 1 calc R U . . .
 H6C H 0.485494 0.112695 0.578425 0.032 Uiso 1 1 calc R U . . .
 C7 C 0.73631(5) 0.31022(12) 0.62133(7) 0.0255(3) Uani 1 1 d . . . . .
 H7A H 0.738578 0.252434 0.582174 0.038 Uiso 1 1 calc R U . . .
 H7B H 0.770090 0.344372 0.641449 0.038 Uiso 1 1 calc R U . . .
 H7C H 0.712227 0.371299 0.598624 0.038 Uiso 1 1 calc R U . . .
 C8 C 0.75573(4) 0.16102(11) 0.72051(7) 0.0235(3) Uani 1 1 d . . . . .
 H8A H 0.744618 0.125174 0.763534 0.035 Uiso 1 1 calc R U . . .
 H8B H 0.789483 0.196222 0.738949 0.035 Uiso 1 1 calc R U . . .
 H8C H 0.757650 0.101700 0.682128 0.035 Uiso 1 1 calc R U . . .
 C9 C 0.71512(5) 0.34121(11) 0.74494(7) 0.0256(3) Uani 1 1 d . . . . .
 H9A H 0.691735 0.403526 0.722231 0.038 Uiso 1 1 calc R U . . .
 H9B H 0.749190 0.373602 0.765552 0.038 Uiso 1 1 calc R U . . .
 H9C H 0.702532 0.304355 0.786327 0.038 Uiso 1 1 calc R U . . .
 O11 O 0.61886(3) 0.75438(6) 0.39468(4) 0.01612(17) Uani 1 1 d . . . . .
 O12 O 0.59329(3) 0.64863(7) 0.27813(4) 0.02030(18) Uani 1 1 d . . . . .
 O13 O 0.63903(3) 0.55041(7) 0.38924(4) 0.01881(18) Uani 1 1 d . . . . .
 O14 O 0.60528(3) 0.62416(7) 0.49248(4) 0.01749(17) Uani 1 1 d . . . . .
 O15 O 0.67530(3) 0.60583(7) 0.60130(4) 0.01904(18) Uani 1 1 d . . . . .
 O16 O 0.69059(3) 0.67701(7) 0.48316(4) 0.01744(17) Uani 1 1 d . . . . .
 O17 O 0.58276(3) 0.84898(7) 0.27660(5) 0.02274(19) Uani 1 1 d . . . . .
 H17 H 0.592566 0.907939 0.303455 0.034 Uiso 1 1 calc R U . . .
 O18 O 0.61290(4) 0.45273(7) 0.26914(4) 0.0254(2) Uani 1 1 d . . . . .
 H18 H 0.620827 0.393941 0.296980 0.038 Uiso 1 1 calc R U . . .
 O19 O 0.58913(3) 0.57213(7) 0.61025(4) 0.02073(18) Uani 1 1 d . . . . .
 H19 H 0.604167 0.567338 0.656633 0.031 Uiso 1 1 calc R U . . .
 O20 O 0.75705(3) 0.67030(8) 0.59650(5) 0.0238(2) Uani 1 1 d . . . . .
 H20 H 0.772737 0.704203 0.567293 0.036 Uiso 1 1 calc R U . . .
 B11 B 0.63843(5) 0.65077(11) 0.44092(7) 0.0158(2) Uani 1 1 d . . . . .
 B12 B 0.59848(5) 0.75230(11) 0.31805(7) 0.0161(3) Uani 1 1 d . . . . .
 B13 B 0.61516(5) 0.54913(11) 0.31417(7) 0.0174(3) Uani 1 1 d . . . . .
 B14 B 0.62353(5) 0.60100(11) 0.56789(7) 0.0164(3) Uani 1 1 d . . . . .
 B15 B 0.70782(5) 0.65220(11) 0.55899(7) 0.0176(3) Uani 1 1 d . . . . .
 O1 O 0.56447(3) 0.14899(7) 0.25720(4) 0.01817(17) Uani 1 1 d . . . . .
 O2 O 0.58448(3) 0.10188(7) 0.13762(4) 0.02187(19) Uani 1 1 d . . . . .
 O3 O 0.65252(3) 0.13130(7) 0.24766(4) 0.01806(17) Uani 1 1 d . . . . .
 O4 O 0.62342(3) 0.04183(7) 0.35112(4) 0.01724(17) Uani 1 1 d . . . . .
 O5 O 0.65164(3) 0.15186(7) 0.46520(4) 0.02288(19) Uani 1 1 d . . . . .
 O6 O 0.63117(3) 0.25065(7) 0.34489(4) 0.01665(17) Uani 1 1 d . . . . .
 O7 O 0.49912(3) 0.11095(8) 0.14583(5) 0.0263(2) Uani 1 1 d . . . . .
 H7 H 0.480870 0.125595 0.176958 0.039 Uiso 1 1 calc R U . . .
 O8 O 0.67150(3) 0.09739(8) 0.12865(5) 0.02345(19) Uani 1 1 d . . . . .
 H8 H 0.656579 0.084554 0.082926 0.035 Uiso 1 1 calc R U . . .
 O9 O 0.63922(3) -0.04773(7) 0.47381(4) 0.02162(19) Uani 1 1 d . . . . .
 H9 H 0.632160 -0.107099 0.446284 0.032 Uiso 1 1 calc R U . . .
 O10 O 0.66099(4) 0.35169(7) 0.46250(5) 0.0287(2) Uani 1 1 d . . . . .
 H10 H 0.654232 0.408935 0.432944 0.043 Uiso 1 1 calc R U . . .
 B1 B 0.61817(5) 0.14332(11) 0.29941(7) 0.0162(3) Uani 1 1 d . . . . .
 B2 B 0.54916(5) 0.12159(11) 0.18158(7) 0.0192(3) Uani 1 1 d . . . . .
 B3 B 0.63604(5) 0.11098(11) 0.17173(7) 0.0177(3) Uani 1 1 d . . . . .
 B4 B 0.63807(5) 0.04741(11) 0.42844(7) 0.0167(3) Uani 1 1 d . . . . .
 B5 B 0.64760(5) 0.25304(11) 0.42251(7) 0.0187(3) Uani 1 1 d . . . . .
 O21 O 0.51267(19) 0.4084(5) 0.3064(3) 0.0686(18) Uani 0.264(3) 1 d G . P A -1
 H21A H 0.480883 0.395797 0.307243 0.103 Uiso 0.264(3) 1 d G U P A -1
 H21B H 0.518507 0.383011 0.263412 0.103 Uiso 0.264(3) 1 d G U P A -1
 O22 O 0.7512(2) 0.0098(7) 0.5744(6) 0.124(4) Uani 0.236(3) 1 d G . P A 1
 H22A H 0.727152 -0.041123 0.558891 0.186 Uiso 0.236(3) 1 d G U P A 1
 H22B H 0.778852 -0.031339 0.588901 0.186 Uiso 0.236(3) 1 d G U P A 1

loop_
  _atom_site_aniso_label
  _atom_site_aniso_U_11
  _atom_site_aniso_U_22
  _atom_site_aniso_U_33
  _atom_site_aniso_U_23
  _atom_site_aniso_U_13
  _atom_site_aniso_U_12
 N1 0.0137(5) 0.0202(5) 0.0159(5) -0.0009(4) -0.0007(4) -0.0001(4)
 N2 0.0142(5) 0.0216(5) 0.0163(5) 0.0013(4) -0.0004(4) 0.0020(4)
 C1 0.0153(5) 0.0190(6) 0.0183(6) 0.0005(4) 0.0004(4) 0.0022(4)
 C2 0.0147(5) 0.0211(6) 0.0162(5) -0.0001(4) -0.0010(4) 0.0012(4)
 C3 0.0153(5) 0.0201(6) 0.0191(6) 0.0004(4) 0.0004(4) 0.0004(4)
 C4 0.0169(6) 0.0293(7) 0.0221(6) -0.0073(5) 0.0008(5) 0.0019(5)
 C5 0.0196(6) 0.0257(6) 0.0195(6) 0.0040(5) -0.0006(5) 0.0002(5)
 C6 0.0168(6) 0.0230(6) 0.0218(6) -0.0024(5) -0.0008(5) -0.0046(4)
 C7 0.0187(6) 0.0337(7) 0.0226(6) 0.0073(5) 0.0018(5) -0.0023(5)
 C8 0.0166(6) 0.0251(6) 0.0265(6) 0.0048(5) -0.0001(5) 0.0065(5)
 C9 0.0192(6) 0.0295(7) 0.0249(6) -0.0091(5) -0.0019(5) 0.0021(5)
 O11 0.0189(4) 0.0147(4) 0.0129(4) 0.0002(3) -0.0002(3) 0.0002(3)
 O12 0.0278(4) 0.0168(4) 0.0130(4) -0.0001(3) -0.0022(3) 0.0013(3)
 O13 0.0239(4) 0.0155(4) 0.0146(4) 0.0003(3) -0.0007(3) 0.0020(3)
 O14 0.0157(4) 0.0207(4) 0.0142(4) 0.0019(3) -0.0006(3) -0.0017(3)
 O15 0.0168(4) 0.0228(4) 0.0150(4) 0.0034(3) -0.0017(3) -0.0028(3)
 O16 0.0156(4) 0.0217(4) 0.0136(4) 0.0013(3) 0.0003(3) -0.0014(3)
 O17 0.0329(5) 0.0164(4) 0.0149(4) 0.0000(3) -0.0031(3) 0.0008(3)
 O18 0.0427(5) 0.0169(4) 0.0141(4) 0.0010(3) 0.0014(4) 0.0047(4)
 O19 0.0186(4) 0.0274(4) 0.0145(4) 0.0032(3) 0.0003(3) -0.0023(3)
 O20 0.0162(4) 0.0364(5) 0.0168(4) 0.0053(4) -0.0003(3) -0.0045(3)
 B11 0.0167(6) 0.0155(6) 0.0133(6) 0.0000(5) -0.0007(5) -0.0003(5)
 B12 0.0144(6) 0.0182(6) 0.0149(6) 0.0001(5) 0.0017(5) -0.0007(5)
 B13 0.0196(6) 0.0181(6) 0.0142(6) 0.0007(5) 0.0031(5) -0.0011(5)
 B14 0.0189(6) 0.0140(6) 0.0145(6) 0.0007(5) 0.0000(5) -0.0004(5)
 B15 0.0178(6) 0.0180(6) 0.0153(6) 0.0005(5) 0.0001(5) 0.0000(5)
 O1 0.0176(4) 0.0219(4) 0.0133(4) -0.0005(3) -0.0002(3) 0.0002(3)
 O2 0.0227(4) 0.0280(5) 0.0129(4) -0.0025(3) -0.0002(3) -0.0002(3)
 O3 0.0178(4) 0.0214(4) 0.0139(4) -0.0015(3) 0.0013(3) -0.0011(3)
 O4 0.0215(4) 0.0153(4) 0.0130(4) 0.0002(3) -0.0001(3) -0.0011(3)
 O5 0.0377(5) 0.0160(4) 0.0125(4) -0.0002(3) 0.0007(4) -0.0005(3)
 O6 0.0205(4) 0.0150(4) 0.0129(4) -0.0004(3) 0.0006(3) -0.0006(3)
 O7 0.0199(4) 0.0421(5) 0.0149(4) -0.0025(4) -0.0004(3) -0.0019(4)
 O8 0.0264(5) 0.0284(5) 0.0151(4) -0.0038(4) 0.0038(3) -0.0024(4)
 O9 0.0341(5) 0.0160(4) 0.0136(4) -0.0006(3) 0.0030(3) -0.0012(3)
 O10 0.0517(6) 0.0154(4) 0.0141(4) 0.0007(3) -0.0028(4) -0.0004(4)
 B1 0.0181(6) 0.0169(6) 0.0119(6) -0.0001(5) 0.0001(5) -0.0006(5)
 B2 0.0218(7) 0.0193(6) 0.0142(6) 0.0013(5) -0.0009(5) -0.0004(5)
 B3 0.0227(7) 0.0137(6) 0.0155(6) 0.0000(5) 0.0016(5) -0.0008(5)
 B4 0.0169(6) 0.0178(6) 0.0147(6) -0.0003(5) 0.0020(5) 0.0009(5)
 B5 0.0217(7) 0.0184(6) 0.0147(6) 0.0003(5) 0.0015(5) 0.0012(5)
 O21 0.042(3) 0.072(4) 0.096(5) -0.013(3) 0.026(3) -0.005(2)
 O22 0.039(3) 0.112(6) 0.225(10) -0.117(7) 0.038(5) -0.015(4)

_geom_special_details
;
 All esds (except the esd in the dihedral angle between two l.s. planes)
 are estimated using the full covariance matrix.  The cell esds are taken
 into account individually in the estimation of esds in distances, angles
 and torsion angles; correlations between esds in cell parameters are only
 used when they are defined by crystal symmetry.  An approximate (isotropic)
 treatment of cell esds is used for estimating esds involving l.s. planes.
;
loop_
  _geom_bond_atom_site_label_1
  _geom_bond_atom_site_label_2
  _geom_bond_distance
  _geom_bond_site_symmetry_2
  _geom_bond_publ_flag
 N1 C1 1.5129(14) . ?
 N1 C4 1.5006(15) . ?
 N1 C5 1.4994(15) . ?
 N1 C6 1.5033(14) . ?
 N2 C3 1.5151(14) . ?
 N2 C7 1.4963(15) . ?
 N2 C8 1.5045(14) . ?
 N2 C9 1.4932(15) . ?
 C1 H1A 0.9900 . ?
 C1 H1B 0.9900 . ?
 C1 C2 1.5262(15) . ?
 C2 H2A 0.9900 . ?
 C2 H2B 0.9900 . ?
 C2 C3 1.5254(15) . ?
 C3 H3A 0.9900 . ?
 C3 H3B 0.9900 . ?
 C4 H4A 0.9800 . ?
 C4 H4B 0.9800 . ?
 C4 H4C 0.9800 . ?
 C5 H5A 0.9800 . ?
 C5 H5B 0.9800 . ?
 C5 H5C 0.9800 . ?
 C6 H6A 0.9800 . ?
 C6 H6B 0.9800 . ?
 C6 H6C 0.9800 . ?
 C7 H7A 0.9800 . ?
 C7 H7B 0.9800 . ?
 C7 H7C 0.9800 . ?
 C8 H8A 0.9800 . ?
 C8 H8B 0.9800 . ?
 C8 H8C 0.9800 . ?
 C9 H9A 0.9800 . ?
 C9 H9B 0.9800 . ?
 C9 H9C 0.9800 . ?
 O11 B11 1.4807(14) . ?
 O11 B12 1.3591(14) . ?
 O12 B12 1.3838(15) . ?
 O12 B13 1.3806(15) . ?
 O13 B11 1.4848(15) . ?
 O13 B13 1.3534(15) . ?
 O14 B11 1.4555(15) . ?
 O14 B14 1.3565(14) . ?
 O15 B14 1.3852(15) . ?
 O15 B15 1.3882(15) . ?
 O16 B11 1.4652(14) . ?
 O16 B15 1.3638(15) . ?
 O17 H17 0.8400 . ?
 O17 B12 1.3529(15) . ?
 O18 H18 0.8400 . ?
 O18 B13 1.3669(15) . ?
 O19 H19 0.8400 . ?
 O19 B14 1.3647(15) . ?
 O20 H20 0.8400 . ?
 O20 B15 1.3571(15) . ?
 O1 B1 1.4708(14) . ?
 O1 B2 1.3620(15) . ?
 O2 B2 1.3839(16) . ?
 O2 B3 1.3855(15) . ?
 O3 B1 1.4570(15) . ?
 O3 B3 1.3533(15) . ?
 O4 B1 1.4797(14) . ?
 O4 B4 1.3542(15) . ?
 O5 B4 1.3813(15) . ?
 O5 B5 1.3859(15) . ?
 O6 B1 1.4794(14) . ?
 O6 B5 1.3619(15) . ?
 O7 H7 0.8400 . ?
 O7 B2 1.3574(15) . ?
 O8 H8 0.8400 . ?
 O8 B3 1.3656(16) . ?
 O9 H9 0.8400 . ?
 O9 B4 1.3619(15) . ?
 O10 H10 0.8400 . ?
 O10 B5 1.3490(15) . ?
 O21 H21A 0.8699 . ?
 O21 H21B 0.8722 . ?
 O22 H22A 0.8702 . ?
 O22 H22B 0.8707 . ?

loop_
  _geom_angle_atom_site_label_1
  _geom_angle_atom_site_label_2
  _geom_angle_atom_site_label_3
  _geom_angle
  _geom_angle_site_symmetry_1
  _geom_angle_site_symmetry_3
  _geom_angle_publ_flag
 C4 N1 C1 111.12(9) . . ?
 C4 N1 C6 108.90(9) . . ?
 C5 N1 C1 111.76(9) . . ?
 C5 N1 C4 109.23(9) . . ?
 C5 N1 C6 108.64(9) . . ?
 C6 N1 C1 107.10(9) . . ?
 C7 N2 C3 111.16(9) . . ?
 C7 N2 C8 109.06(9) . . ?
 C8 N2 C3 106.96(9) . . ?
 C9 N2 C3 111.85(9) . . ?
 C9 N2 C7 109.26(10) . . ?
 C9 N2 C8 108.45(9) . . ?
 N1 C1 H1A 108.5 . . ?
 N1 C1 H1B 108.5 . . ?
 N1 C1 C2 115.16(9) . . ?
 H1A C1 H1B 107.5 . . ?
 C2 C1 H1A 108.5 . . ?
 C2 C1 H1B 108.5 . . ?
 C1 C2 H2A 110.6 . . ?
 C1 C2 H2B 110.6 . . ?
 H2A C2 H2B 108.7 . . ?
 C3 C2 C1 105.85(9) . . ?
 C3 C2 H2A 110.6 . . ?
 C3 C2 H2B 110.6 . . ?
 N2 C3 C2 115.36(9) . . ?
 N2 C3 H3A 108.4 . . ?
 N2 C3 H3B 108.4 . . ?
 C2 C3 H3A 108.4 . . ?
 C2 C3 H3B 108.4 . . ?
 H3A C3 H3B 107.5 . . ?
 N1 C4 H4A 109.5 . . ?
 N1 C4 H4B 109.5 . . ?
 N1 C4 H4C 109.5 . . ?
 H4A C4 H4B 109.5 . . ?
 H4A C4 H4C 109.5 . . ?
 H4B C4 H4C 109.5 . . ?
 N1 C5 H5A 109.5 . . ?
 N1 C5 H5B 109.5 . . ?
 N1 C5 H5C 109.5 . . ?
 H5A C5 H5B 109.5 . . ?
 H5A C5 H5C 109.5 . . ?
 H5B C5 H5C 109.5 . . ?
 N1 C6 H6A 109.5 . . ?
 N1 C6 H6B 109.5 . . ?
 N1 C6 H6C 109.5 . . ?
 H6A C6 H6B 109.5 . . ?
 H6A C6 H6C 109.5 . . ?
 H6B C6 H6C 109.5 . . ?
 N2 C7 H7A 109.5 . . ?
 N2 C7 H7B 109.5 . . ?
 N2 C7 H7C 109.5 . . ?
 H7A C7 H7B 109.5 . . ?
 H7A C7 H7C 109.5 . . ?
 H7B C7 H7C 109.5 . . ?
 N2 C8 H8A 109.5 . . ?
 N2 C8 H8B 109.5 . . ?
 N2 C8 H8C 109.5 . . ?
 H8A C8 H8B 109.5 . . ?
 H8A C8 H8C 109.5 . . ?
 H8B C8 H8C 109.5 . . ?
 N2 C9 H9A 109.5 . . ?
 N2 C9 H9B 109.5 . . ?
 N2 C9 H9C 109.5 . . ?
 H9A C9 H9B 109.5 . . ?
 H9A C9 H9C 109.5 . . ?
 H9B C9 H9C 109.5 . . ?
 B12 O11 B11 124.22(9) . . ?
 B13 O12 B12 119.53(9) . . ?
 B13 O13 B11 124.04(9) . . ?
 B14 O14 B11 122.71(9) . . ?
 B14 O15 B15 118.31(9) . . ?
 B15 O16 B11 122.70(9) . . ?
 B12 O17 H17 109.5 . . ?
 B13 O18 H18 109.5 . . ?
 B14 O19 H19 109.5 . . ?
 B15 O20 H20 109.5 . . ?
 O11 B11 O13 109.36(9) . . ?
 O14 B11 O11 109.58(9) . . ?
 O14 B11 O13 109.13(9) . . ?
 O14 B11 O16 111.53(9) . . ?
 O16 B11 O11 107.41(9) . . ?
 O16 B11 O13 109.80(9) . . ?
 O11 B12 O12 120.57(10) . . ?
 O17 B12 O11 123.02(10) . . ?
 O17 B12 O12 116.41(10) . . ?
 O13 B13 O12 120.78(10) . . ?
 O13 B13 O18 122.96(11) . . ?
 O18 B13 O12 116.20(10) . . ?
 O14 B14 O15 121.55(10) . . ?
 O14 B14 O19 117.78(10) . . ?
 O19 B14 O15 120.66(10) . . ?
 O16 B15 O15 120.86(10) . . ?
 O20 B15 O15 116.88(10) . . ?
 O20 B15 O16 122.26(11) . . ?
 B2 O1 B1 122.75(9) . . ?
 B2 O2 B3 118.86(9) . . ?
 B3 O3 B1 123.23(9) . . ?
 B4 O4 B1 124.65(9) . . ?
 B4 O5 B5 119.39(9) . . ?
 B5 O6 B1 124.17(9) . . ?
 B2 O7 H7 109.5 . . ?
 B3 O8 H8 109.5 . . ?
 B4 O9 H9 109.5 . . ?
 B5 O10 H10 109.5 . . ?
 O1 B1 O4 107.48(9) . . ?
 O1 B1 O6 109.13(9) . . ?
 O3 B1 O1 111.47(9) . . ?
 O3 B1 O4 109.90(9) . . ?
 O3 B1 O6 109.06(9) . . ?
 O6 B1 O4 109.79(9) . . ?
 O1 B2 O2 120.97(11) . . ?
 O7 B2 O1 122.26(11) . . ?
 O7 B2 O2 116.76(10) . . ?
 O3 B3 O2 121.52(11) . . ?
 O3 B3 O8 118.61(11) . . ?
 O8 B3 O2 119.86(10) . . ?
 O4 B4 O5 120.93(10) . . ?
 O4 B4 O9 122.38(10) . . ?
 O9 B4 O5 116.67(10) . . ?
 O6 B5 O5 120.95(11) . . ?
 O10 B5 O5 115.96(10) . . ?
 O10 B5 O6 123.09(11) . . ?
 H21A O21 H21B 109.5 . . ?
 H22A O22 H22B 104.4 . . ?

loop_
  _geom_hbond_atom_site_label_D
  _geom_hbond_atom_site_label_H
  _geom_hbond_atom_site_label_A
  _geom_hbond_distance_DH
  _geom_hbond_distance_HA
  _geom_hbond_distance_DA
  _geom_hbond_angle_DHA
  _geom_hbond_site_symmetry_A
  _geom_hbond_publ_flag
 O17 H17 O4 0.84 1.86 2.6941(11) 168.9 1_565 yes
 O18 H18 O6 0.84 1.85 2.6851(11) 170.3 . yes
 O19 H19 O18 0.84 1.99 2.7903(11) 158.5 6_566 yes
 O20 H20 O16 0.84 2.02 2.8347(11) 164.0 7_666 yes
 O7 H7 O1 0.84 1.90 2.7371(12) 175.0 2_655 yes
 O8 H8 O9 0.84 1.95 2.7745(11) 165.7 6 yes
 O9 H9 O11 0.84 1.84 2.6766(11) 174.3 1_545 yes
 O10 H10 O13 0.84 1.82 2.6399(11) 166.7 . yes
 O21 H21A O18 0.87 2.66 3.377(5) 140.2 2_655 yes
 O22 H22A O8 0.87 2.25 2.830(9) 123.7 6_556 yes
 O22 H22A O9 0.87 2.51 3.206(7) 138.0 . yes
 O22 H22B O13 0.87 2.16 2.956(7) 151.2 7_656 yes
 O22 H22B O16 0.87 2.38 2.981(6) 126.8 7_656 yes

loop_
  _geom_torsion_atom_site_label_1
  _geom_torsion_atom_site_label_2
  _geom_torsion_atom_site_label_3
  _geom_torsion_atom_site_label_4
  _geom_torsion
  _geom_torsion_site_symmetry_1
  _geom_torsion_site_symmetry_2
  _geom_torsion_site_symmetry_3
  _geom_torsion_site_symmetry_4
  _geom_torsion_publ_flag
 N1 C1 C2 C3 175.18(9) . . . . ?
 C1 C2 C3 N2 178.58(9) . . . . ?
 C4 N1 C1 C2 -62.67(12) . . . . ?
 C5 N1 C1 C2 59.63(12) . . . . ?
 C6 N1 C1 C2 178.50(9) . . . . ?
 C7 N2 C3 C2 -62.55(12) . . . . ?
 C8 N2 C3 C2 178.49(9) . . . . ?
 C9 N2 C3 C2 59.89(13) . . . . ?
 B11 O11 B12 O12 2.12(17) . . . . ?
 B11 O11 B12 O17 -177.25(10) . . . . ?
 B11 O13 B13 O12 7.91(17) . . . . ?
 B11 O13 B13 O18 -174.77(11) . . . . ?
 B11 O14 B14 O15 2.60(17) . . . . ?
 B11 O14 B14 O19 -177.17(10) . . . . ?
 B11 O16 B15 O15 -3.57(17) . . . . ?
 B11 O16 B15 O20 175.87(10) . . . . ?
 B12 O11 B11 O13 8.01(14) . . . . ?
 B12 O11 B11 O14 -111.56(11) . . . . ?
 B12 O11 B11 O16 127.13(10) . . . . ?
 B12 O12 B13 O13 3.86(17) . . . . ?
 B12 O12 B13 O18 -173.63(10) . . . . ?
 B13 O12 B12 O11 -8.76(16) . . . . ?
 B13 O12 B12 O17 170.65(10) . . . . ?
 B13 O13 B11 O11 -13.05(15) . . . . ?
 B13 O13 B11 O14 106.81(11) . . . . ?
 B13 O13 B11 O16 -130.67(11) . . . . ?
 B14 O14 B11 O11 -132.74(10) . . . . ?
 B14 O14 B11 O13 107.53(11) . . . . ?
 B14 O14 B11 O16 -13.95(15) . . . . ?
 B14 O15 B15 O16 -9.21(16) . . . . ?
 B14 O15 B15 O20 171.32(10) . . . . ?
 B15 O15 B14 O14 9.75(16) . . . . ?
 B15 O15 B14 O19 -170.48(10) . . . . ?
 B15 O16 B11 O11 134.51(10) . . . . ?
 B15 O16 B11 O13 -106.66(11) . . . . ?
 B15 O16 B11 O14 14.43(15) . . . . ?
 B1 O1 B2 O2 -8.90(17) . . . . ?
 B1 O1 B2 O7 170.34(11) . . . . ?
 B1 O3 B3 O2 0.99(17) . . . . ?
 B1 O3 B3 O8 -177.91(10) . . . . ?
 B1 O4 B4 O5 -2.84(17) . . . . ?
 B1 O4 B4 O9 175.74(10) . . . . ?
 B1 O6 B5 O5 -2.23(18) . . . . ?
 B1 O6 B5 O10 177.54(11) . . . . ?
 B2 O1 B1 O3 12.87(15) . . . . ?
 B2 O1 B1 O4 -107.61(11) . . . . ?
 B2 O1 B1 O6 133.38(10) . . . . ?
 B2 O2 B3 O3 4.26(17) . . . . ?
 B2 O2 B3 O8 -176.86(10) . . . . ?
 B3 O2 B2 O1 -0.30(17) . . . . ?
 B3 O2 B2 O7 -179.59(10) . . . . ?
 B3 O3 B1 O1 -8.95(15) . . . . ?
 B3 O3 B1 O4 110.10(11) . . . . ?
 B3 O3 B1 O6 -129.50(10) . . . . ?
 B4 O4 B1 O1 -118.70(11) . . . . ?
 B4 O4 B1 O3 119.83(11) . . . . ?
 B4 O4 B1 O6 -0.12(15) . . . . ?
 B4 O5 B5 O6 -0.94(17) . . . . ?
 B4 O5 B5 O10 179.28(11) . . . . ?
 B5 O5 B4 O4 3.41(17) . . . . ?
 B5 O5 B4 O9 -175.25(10) . . . . ?
 B5 O6 B1 O1 120.20(11) . . . . ?
 B5 O6 B1 O3 -117.82(11) . . . . ?
 B5 O6 B1 O4 2.65(15) . . . . ?

_shelx_res_file
;
TITL 2018ncs0033_2b_a.res in C2/c
    2018ncs0033_2b.res
    created by SHELXL-2018/3 at 16:02:26 on 25-Nov-2019
REM Old TITL 2018ncs0033_2b in C2/c
REM SHELXT solution in C2/c: R1 0.147, Rweak 0.045, Alpha 0.024
REM <I/s> 0.516 for 285 systematic absences, Orientation as input
REM Formula found by SHELXT: C17 B2 N3 O19
CELL 0.71075 26.8754 11.5269 17.9383 90 103.154 90
ZERR 8 0.0005 0.0002 0.0004 0 0.002 0
LATT 7
SYMM -X,+Y,0.5-Z
SFAC C H B N O
UNIT 72 264 80 16 164
EQIV $1 +X,1-Y,0.5+Z
EQIV $2 +X,-Y,0.5+Z
EQIV $3 1-X,+Y,0.5-Z
EQIV $4 1.5-X,0.5-Y,1-Z
EQIV $5 +X,1+Y,+Z
EQIV $6 1.5-X,1.5-Y,1-Z
EQIV $7 +X,-Y,-0.5+Z
EQIV $8 +X,-1+Y,+Z

L.S. 19
PLAN  5
SIZE 0.035 0.14 0.26
TEMP -173(2)
HTAB O17 O4_$5
HTAB O18 O6
HTAB O19 O18_$1
HTAB O20 O16_$6
HTAB O7 O1_$3
HTAB O8 O9_$7
HTAB O9 O11_$8
HTAB O10 O13
HTAB O21 O18_$3
HTAB O22 O8_$2
HTAB O22 O9
HTAB O22 O13_$4
HTAB O22 O16_$4
CONF
HTAB
BUMP -0.025
BOND $H
MORE -1
fmap 2
acta
REM <olex2.extras>
REM <HklSrc "%.\\2018ncs0033_2b.hkl">
REM </olex2.extras>

WGHT    0.047300    2.269500
FVAR       0.19800   0.47110
N1    4    0.527003    0.254421    0.559429    11.00000    0.01372    0.02019 =
         0.01587   -0.00085   -0.00071   -0.00011
N2    4    0.718023    0.253064    0.685079    11.00000    0.01417    0.02158 =
         0.01631    0.00129   -0.00042    0.00197
C1    1    0.576919    0.192897    0.592152    11.00000    0.01528    0.01897 =
         0.01832    0.00051    0.00041    0.00222
AFIX  23
H1A   2    0.584278    0.139656    0.552706    11.00000   -1.20000
H1B   2    0.572637    0.144948    0.636051    11.00000   -1.20000
AFIX   0
C2    1    0.622976    0.272268    0.618938    11.00000    0.01466    0.02113 =
         0.01623   -0.00008   -0.00101    0.00120
AFIX  23
H2A   2    0.630886    0.314693    0.575057    11.00000   -1.20000
H2B   2    0.616185    0.329381    0.656633    11.00000   -1.20000
AFIX   0
C3    1    0.667225    0.192927    0.655571    11.00000    0.01535    0.02014 =
         0.01914    0.00038    0.00043    0.00041
AFIX  23
H3A   2    0.657916    0.151347    0.698738    11.00000   -1.20000
H3B   2    0.671584    0.134063    0.617375    11.00000   -1.20000
AFIX   0
C4    1    0.511562    0.329737    0.618575    11.00000    0.01692    0.02929 =
         0.02213   -0.00728    0.00084    0.00185
AFIX 137
H4A   2    0.510569    0.283108    0.663895    11.00000   -1.50000
H4B   2    0.477643    0.362577    0.597498    11.00000   -1.50000
H4C   2    0.536392    0.392710    0.632956    11.00000   -1.50000
AFIX   0
C5    1    0.529982    0.326949    0.491193    11.00000    0.01956    0.02567 =
         0.01953    0.00396   -0.00059    0.00016
AFIX 137
H5A   2    0.554643    0.389859    0.507084    11.00000   -1.50000
H5B   2    0.496266    0.359893    0.468878    11.00000   -1.50000
H5C   2    0.540982    0.278498    0.453018    11.00000   -1.50000
AFIX   0
C6    1    0.487067    0.162301    0.534653    11.00000    0.01677    0.02296 =
         0.02179   -0.00244   -0.00084   -0.00464
AFIX 137
H6A   2    0.495935    0.115150    0.494096    11.00000   -1.50000
H6B   2    0.453738    0.199006    0.515285    11.00000   -1.50000
H6C   2    0.485494    0.112695    0.578425    11.00000   -1.50000
AFIX   0
C7    1    0.736307    0.310223    0.621332    11.00000    0.01866    0.03373 =
         0.02262    0.00726    0.00177   -0.00233
AFIX 137
H7A   2    0.738578    0.252434    0.582174    11.00000   -1.50000
H7B   2    0.770090    0.344372    0.641449    11.00000   -1.50000
H7C   2    0.712227    0.371299    0.598624    11.00000   -1.50000
AFIX   0
C8    1    0.755730    0.161017    0.720511    11.00000    0.01656    0.02511 =
         0.02648    0.00477   -0.00011    0.00649
AFIX 137
H8A   2    0.744618    0.125174    0.763534    11.00000   -1.50000
H8B   2    0.789483    0.196222    0.738949    11.00000   -1.50000
H8C   2    0.757650    0.101700    0.682128    11.00000   -1.50000
AFIX   0
C9    1    0.715121    0.341211    0.744941    11.00000    0.01918    0.02949 =
         0.02489   -0.00905   -0.00187    0.00212
AFIX 137
H9A   2    0.691735    0.403526    0.722231    11.00000   -1.50000
H9B   2    0.749190    0.373602    0.765552    11.00000   -1.50000
H9C   2    0.702532    0.304355    0.786327    11.00000   -1.50000
AFIX   0

O11   5    0.618862    0.754379    0.394680    11.00000    0.01894    0.01468 =
         0.01288    0.00016   -0.00024    0.00017
O12   5    0.593292    0.648631    0.278126    11.00000    0.02783    0.01682 =
         0.01296   -0.00009   -0.00222    0.00132
O13   5    0.639027    0.550410    0.389238    11.00000    0.02390    0.01551 =
         0.01457    0.00035   -0.00071    0.00205
O14   5    0.605275    0.624158    0.492476    11.00000    0.01568    0.02073 =
         0.01415    0.00194   -0.00059   -0.00172
O15   5    0.675302    0.605834    0.601303    11.00000    0.01680    0.02282 =
         0.01496    0.00339   -0.00167   -0.00284
O16   5    0.690588    0.677013    0.483158    11.00000    0.01563    0.02167 =
         0.01357    0.00128    0.00033   -0.00142
O17   5    0.582762    0.848976    0.276603    11.00000    0.03287    0.01639 =
         0.01488    0.00003   -0.00308    0.00077
AFIX 147
H17   2    0.592566    0.907939    0.303455    11.00000   -1.50000
AFIX   0
O18   5    0.612902    0.452734    0.269143    11.00000    0.04273    0.01692 =
         0.01410    0.00100    0.00143    0.00469
AFIX 147
H18   2    0.620827    0.393941    0.296980    11.00000   -1.50000
AFIX   0
O19   5    0.589130    0.572134    0.610250    11.00000    0.01862    0.02743 =
         0.01448    0.00325    0.00028   -0.00225
AFIX 147
H19   2    0.604167    0.567338    0.656633    11.00000   -1.50000
AFIX   0
O20   5    0.757050    0.670302    0.596504    11.00000    0.01622    0.03643 =
         0.01676    0.00527   -0.00030   -0.00449
AFIX 147
H20   2    0.772737    0.704203    0.567293    11.00000   -1.50000
AFIX   0
B11   3    0.638433    0.650768    0.440921    11.00000    0.01671    0.01553 =
         0.01333    0.00001   -0.00067   -0.00031
B12   3    0.598484    0.752299    0.318054    11.00000    0.01439    0.01819 =
         0.01487    0.00014    0.00166   -0.00070
B13   3    0.615160    0.549126    0.314175    11.00000    0.01958    0.01809 =
         0.01417    0.00074    0.00313   -0.00112
B14   3    0.623531    0.600998    0.567895    11.00000    0.01891    0.01396 =
         0.01449    0.00067    0.00005   -0.00041
B15   3    0.707818    0.652201    0.558993    11.00000    0.01776    0.01795 =
         0.01533    0.00046    0.00007    0.00002

O1    5    0.564469    0.148987    0.257201    11.00000    0.01755    0.02189 =
         0.01328   -0.00045   -0.00023    0.00019
O2    5    0.584483    0.101875    0.137624    11.00000    0.02268    0.02799 =
         0.01289   -0.00250   -0.00024   -0.00015
O3    5    0.652516    0.131295    0.247662    11.00000    0.01784    0.02135 =
         0.01390   -0.00150    0.00133   -0.00113
O4    5    0.623424    0.041827    0.351125    11.00000    0.02148    0.01534 =
         0.01298    0.00020   -0.00007   -0.00108
O5    5    0.651636    0.151862    0.465205    11.00000    0.03767    0.01601 =
         0.01252   -0.00024    0.00067   -0.00052
O6    5    0.631171    0.250653    0.344887    11.00000    0.02048    0.01503 =
         0.01290   -0.00040    0.00057   -0.00060
O7    5    0.499120    0.110948    0.145827    11.00000    0.01987    0.04205 =
         0.01491   -0.00252   -0.00042   -0.00190
AFIX 147
H7    2    0.480870    0.125595    0.176958    11.00000   -1.50000
AFIX   0
O8    5    0.671497    0.097392    0.128646    11.00000    0.02637    0.02844 =
         0.01510   -0.00383    0.00382   -0.00244
AFIX 147
H8    2    0.656579    0.084554    0.082926    11.00000   -1.50000
AFIX   0
O9    5    0.639217   -0.047726    0.473813    11.00000    0.03405    0.01600 =
         0.01365   -0.00055    0.00302   -0.00123
AFIX 147
H9    2    0.632160   -0.107099    0.446284    11.00000   -1.50000
AFIX   0
O10   5    0.660986    0.351694    0.462501    11.00000    0.05168    0.01536 =
         0.01410    0.00066   -0.00281   -0.00040
AFIX 147
H10   2    0.654232    0.408935    0.432944    11.00000   -1.50000
AFIX   0
B1    3    0.618171    0.143317    0.299408    11.00000    0.01807    0.01690 =
         0.01193   -0.00006    0.00015   -0.00057
B2    3    0.549161    0.121587    0.181583    11.00000    0.02180    0.01934 =
         0.01417    0.00126   -0.00089   -0.00044
B3    3    0.636043    0.110977    0.171733    11.00000    0.02271    0.01374 =
         0.01545   -0.00003    0.00164   -0.00082
B4    3    0.638072    0.047411    0.428437    11.00000    0.01691    0.01778 =
         0.01472   -0.00031    0.00204    0.00092
B5    3    0.647599    0.253042    0.422512    11.00000    0.02170    0.01843 =
         0.01469    0.00027    0.00148    0.00121

PART -1
AFIX   6
O21   5    0.512672    0.408361    0.306435   -20.50000    0.04227    0.07207 =
         0.09636   -0.01268    0.02575   -0.00492
H21A  2    0.480883    0.395797    0.307243   -20.50000   -1.50000
H21B  2    0.518507    0.383011    0.263412   -20.50000   -1.50000
AFIX   6

PART 0
PART 1
O22   5    0.751174    0.009825    0.574376    20.50000    0.03915    0.11226 =
         0.22494   -0.11669    0.03798   -0.01536
H22A  2    0.727152   -0.041123    0.558891    20.50000   -1.50000
H22B  2    0.778852   -0.031339    0.588901    20.50000   -1.50000
AFIX   0
HKLF 4


REM  2018ncs0033_2b_a.res in C2/c
REM wR2 = 0.0919, GooF = S = 1.029, Restrained GooF = 1.029 for all data
REM R1 = 0.0351 for 5188 Fo > 4sig(Fo) and 0.0447 for all 6191 data
REM 409 parameters refined using 1 restraints

END

WGHT      0.0473      2.2695

REM Instructions for potential hydrogen bonds
HTAB C1 O5
HTAB C1 O17_$1
HTAB C2 O10
HTAB C2 O12_$1
EQIV $9 -x+1, -y+1, -z+1
HTAB C4 O14_$9
HTAB C4 O19
HTAB C5 O19_$9
HTAB C6 O7_$3
HTAB C6 O14_$9
HTAB C7 O3_$4
HTAB C7 O10
EQIV $10 -x+3/2, y-1/2, -z+3/2
HTAB C8 O20_$10
HTAB C8 O3_$4
HTAB C8 O22
HTAB C9 O8_$4
HTAB C9 O20_$10
HTAB O17 O4_$5
HTAB O18 O6
HTAB O19 O18_$1
HTAB O20 O16_$6
HTAB O7 O1_$3
HTAB O8 O9_$7
HTAB O9 O11_$8
HTAB O10 O13

REM Highest difference peak  0.295,  deepest hole -0.219,  1-sigma level  0.044
Q1    1   0.6010  0.2332  0.6069  11.00000  0.05    0.30
Q2    1   0.6460  0.2368  0.6361  11.00000  0.05    0.25
Q3    1   0.6673  0.6604  0.4647  11.00000  0.05    0.22
Q4    1   0.5495  0.2310  0.5781  11.00000  0.05    0.22
Q5    1   0.5000  0.3995  0.2500  10.50000  0.05    0.21
;
_shelx_res_checksum                55898
_shelx_hkl_file
;
   0   0  -2    1.51    0.35
   0   0   3    0.68    0.28
   0   0  -3    0.74    0.30
   0   0   3   -0.15    0.30
   0   0  -3    0.02    0.33
   0   0  -3   -0.31    0.50
   0   0   3   -0.20    0.37
   0   0   4  267.71    4.87
   0   0  -4  265.48    4.77
   0   0   4  251.43    5.54
   0   0  -4  268.49    5.76
   0   0  -4  264.03    5.94
   0   0   4  256.64    5.77
   0   0  -5    0.41    0.30
   0   0   5    0.51    0.30
   0   0  -5    0.90    0.64
   0   0   5    0.24    0.51
   0   0  -5   -0.10    0.57
   0   0   5    0.39    0.57
   0   0   6  409.56    7.51
   0   0  -6  409.26    7.31
   0   0   6  426.81    9.07
   0   0  -6  422.05    9.12
   0   0   6  385.51    8.51
   0   0  -6  400.95    8.75
   0   0   7    0.14    0.39
   0   0  -7   -0.07    0.36
   0   0  -7   -0.60    0.74
   0   0  -7    0.08    0.67
   0   0   7   -0.26    0.85
   0   0   7    0.62    0.60
   0   0  -8 2436.67   33.90
   0   0   8 2392.77   34.29
   0   0   8 2426.23   37.10
   0   0  -8 2380.03   37.25
   0   0   8 2353.40   36.10
   0   0  -8 2381.96   36.76
   0   0  -9    0.77    0.49
   0   0   9    0.94    0.58
   0   0  -9   -0.35    0.82
   0   0  -9   -0.16    0.92
   0   0   9    0.00    0.75
   0   0   9   -0.79    0.83
   0   0 -10   42.72    2.12
   0   0  10   34.20    2.95
   0   0 -10   44.31    3.39
   0   0  10   41.21    2.96
   0   0 -10   38.70    3.09
   0   0 -11   -0.31    0.45
   0   0 -11   -0.25    0.94
   0   0  11    0.65    0.54
   0   0 -11   -0.22    0.98
   0   0  11    0.18    0.83
   0   0  11    0.64    0.71
   0   0 -12    0.36    1.07
   0   0  12    2.23    0.88
   0   0  12    1.36    0.99
   0   0 -12    1.25    1.08
   0   0  12    2.11    1.00
   0   0 -13   -1.38    1.16
   0   0  13   -0.35    0.77
   0   0  13    0.27    0.98
   0   0 -13    1.41    1.11
   0   0 -14  182.02    8.24
   0   0  14  170.74    5.79
   0   0 -15   -2.77    1.46
   0   0  15   -0.88    0.78
   0   0 -15   -0.61    1.27
   0   0 -16    1.10    1.39
   0   0  16    0.33    0.96
   0   0 -16    3.25    1.99
   0   0 -17    1.51    1.47
   0   0 -17    0.87    1.87
   0   0 -18   11.88    2.80
   0   0 -19   -0.13    1.86
   0   0 -20   -5.32    2.41
   0   0 -21    3.56    2.63
   0   0 -22    8.92    3.08
   0  -2   0 4988.82   67.55
   0   2   0 4961.88   67.17
   0  -2   0 5015.19   66.88
   0   2   0 4911.60   66.72
   0   2  -1 2382.17   32.72
   0  -2   1 2349.15   32.94
   0  -2   1 2329.90   33.15
   0   2   1 2318.73   32.20
   0  -2  -1 2342.23   32.32
   0   2  -1 2276.20   32.95
   0   2   2   63.41    2.73
   0   2  -2   67.09    2.35
   0  -2   2   62.32    2.44
   0   2  -2   64.69    2.37
   0   2  -2   64.22    2.54
   0  -2   2   64.50    2.60
   0   2   2   67.60    1.91
   0  -2  -3  698.16   10.18
   0  -2   3  673.02   11.62
   0   2  -3  673.62   11.60
   0   2   3  693.89   12.69
   0  -2  -3  690.11   12.79
   0   2  -3  689.98   11.65
   0  -2   3  666.00   11.55
   0   2  -3  681.65   12.08
   0   2   3  698.82    9.98
   0  -2   3  680.08   12.21
   0   2  -4   10.02    1.10
   0  -2   4   10.12    1.10
   0  -2  -4   10.00    1.36
   0   2   4   10.95    1.33
   0   2  -4   11.46    1.24
   0  -2   4   10.38    1.23
   0  -2   4    9.19    1.05
   0   2  -4   10.02    1.07
   0  -2   5 1096.21   18.46
   0   2  -5 1083.40   18.17
   0   2  -5 1074.19   17.97
   0  -2   5 1134.15   18.22
   0  -2  -5 1113.02   19.59
   0   2   5 1084.92   18.80
   0  -2   5 1102.99   17.87
   0   2  -5 1089.73   17.99
   0   2  -6   18.36    1.60
   0  -2   6   17.41    1.68
   0  -2   6   15.89    1.65
   0   2  -6   19.80    1.73
   0  -2  -6   14.97    1.86
   0  -2   6   17.85    1.58
   0   2   6   18.00    1.78
   0   2  -6   17.31    1.64
   0   2   6   14.58    1.60
   0   2  -7   53.02    2.84
   0  -2   7   48.97    2.86
   0  -2   7   51.09    2.96
   0   2  -7   45.15    3.10
   0  -2  -7   45.93    3.30
   0  -2   7   47.33    2.79
   0   2   7   52.93    3.11
   0   2   7   46.52    2.91
   0   2  -7   50.50    2.95
   0  -2   8   78.19    3.79
   0   2  -8   77.13    3.54
   0  -2   8   76.04    3.82
   0   2  -8   83.81    4.08
   0  -2  -8   80.85    4.52
   0   2   8   85.40    4.22
   0   2   8   79.03    3.95
   0   2  -8   76.28    3.86
   0  -2   8   76.06    3.62
   0   2  -9 1473.72   24.88
   0  -2   9 1500.07   25.49
   0  -2  -9 1440.24   27.16
   0  -2   9 1518.32   25.87
   0   2  -9 1511.20   26.23
   0   2   9 1576.34   26.78
   0   2   9 1586.38   26.41
   0   2  -9 1510.51   25.83
   0  -2   9 1468.07   25.23
   0   2 -10   10.43    1.39
   0  -2  10    9.59    1.53
   0  -2  10    7.98    1.51
   0  -2 -10    6.27    1.55
   0   2 -10   11.07    1.86
   0   2  10    8.14    1.51
   0   2  10    7.69    1.53
   0   2 -10    8.36    1.57
   0  -2  10   10.24    1.57
   0  -2  11  149.05    5.87
   0   2 -11  142.48    5.47
   0  -2  11  146.69    6.31
   0   2 -11  145.88    6.56
   0   2  11  150.91    6.62
   0   2 -11  148.23    6.30
   0  -2  11  137.25    5.75
   0   2  11  145.46    6.25
   0  -2 -11  142.57    6.91
   0   2 -12   27.73    2.41
   0  -2 -12   26.12    3.16
   0   2 -12   23.30    2.89
   0   2 -12   25.14    2.77
   0   2  12   27.82    2.79
   0  -2  12   21.90    2.44
   0   2 -13   10.92    1.62
   0  -2 -13   10.85    2.27
   0  -2  13    9.96    1.79
   0   2 -13   11.78    2.20
   0   2 -13    8.71    1.82
   0  -2  14   24.32    2.66
   0   2 -14   25.60    2.35
   0  -2 -14   22.37    3.45
   0   2 -14   28.27    3.38
   0   2 -14   24.32    3.03
   0   2 -15   79.96    4.45
   0  -2 -15   88.46    6.44
   0  -2  15   85.51    4.93
   0   2 -15   81.36    5.86
   0   2 -15   92.73    5.99
   0   2 -16    0.94    1.20
   0  -2 -16   -0.11    2.00
   0  -2  16   -0.01    0.97
   0   2 -16   -0.39    1.31
   0   2 -16    2.10    1.11
   0  -2 -17  612.94   19.93
   0  -2  17  610.63   15.59
   0   2 -17  646.81   18.85
   0   2 -17  644.15   18.42
   0   2 -18   16.78    3.19
   0  -2  18   17.81    2.52
   0   2 -18   21.80    3.46
   0  -2 -18   13.15    3.09
   0   2 -19   -0.86    1.55
   0  -2  19   -3.27    1.53
   0   2 -19    1.87    1.55
   0  -2 -19    2.12    2.05
   0   2 -20    5.03    2.49
   0  -2 -20   10.61    3.39
   0   2 -20    7.07    2.72
   0   2 -21   11.62    2.91
   0   2  21   11.60    2.82
   0   2 -21    9.61    2.81
   0  -2 -21   13.83    3.83
   0   2 -22   -1.94    2.05
   0   2  22    1.19    1.78
   0  -2 -22   -2.62    2.32
   0   2 -22    0.79    1.95
   0   4   0 6890.68   92.61
   0  -4   0 6701.12   92.93
   0   4   0 6697.26   93.28
   0  -4   0 6810.11   94.38
   0   4  -1   10.39    1.34
   0  -4  -1    9.42    1.21
   0  -4   1   10.25    1.38
   0   4   1   11.13    1.52
   0  -4  -1   10.54    0.70
   0   4   1   10.76    1.21
   0   4  -1   11.79    1.43
   0  -4   2   74.69    3.61
   0   4  -2   74.39    3.35
   0  -4  -2   78.08    3.30
   0  -4   2   74.46    3.74
   0   4   2   79.85    3.09
   0   4  -2   76.39    3.58
   0  -4   3  515.54   11.09
   0   4  -3  503.37   10.52
   0   4  -3  490.18   10.57
   0   4  -3  512.29   11.30
   0   4   3  519.67    9.61
   0  -4  -3  521.15   10.00
   0  -4   3  496.56   11.51
   0  -4  -4 2012.82   29.03
   0  -4   4 1967.28   30.88
   0   4   4 1990.81   32.87
   0   4  -4 1989.80   30.56
   0   4  -4 1954.98   30.54
   0   4   4 1970.44   28.44
   0  -4   4 1955.55   31.97
   0   4  -4 1956.84   31.50
   0  -4  -5  947.25   15.25
   0   4  -5  936.96   17.31
   0  -4   5  944.94   17.58
   0   4  -5  967.00   18.24
   0   4   5  952.36   14.63
   0  -4   5  947.19   18.60
   0   4  -5  978.37   17.41
   0   4   5  964.32   19.36
   0   4   6  100.78    2.77
   0   4   6   90.67    4.99
   0   4  -6  110.39    4.85
   0   4   6   99.74    2.58
   0  -4   6  100.33    4.93
   0  -4   6   97.08    4.48
   0   4  -6  104.05    4.49
   0  -4   6  104.22    4.48
   0   4  -6  110.27    4.65
   0   4   6   99.05    2.45
   0  -4   7   62.98    3.99
   0   4  -7   58.93    3.65
   0   4   7   61.18    1.58
   0   4  -7   57.91    3.54
   0  -4   7   60.06    3.52
   0   4   7   61.67    2.42
   0  -4  -7   58.66    4.15
   0   4   7   62.93    4.04
   0  -4   7   58.08    3.46
   0   4  -7   62.71    3.53
   0   4  -8  774.92   16.48
   0  -4   8  750.47   16.83
   0   4  -8  765.31   15.85
   0  -4   8  773.42   16.09
   0  -4  -8  746.69   18.21
   0   4   8  787.69   17.28
   0  -4   8  803.28   16.13
   0   4  -8  772.05   15.98
   0  -4   9  101.51    5.34
   0   4  -9   96.74    4.88
   0  -4   9   98.40    4.90
   0   4  -9   98.59    4.92
   0   4   9  103.53    5.58
   0  -4  -9  102.41    5.98
   0   4   9  103.59    5.41
   0  -4   9   99.57    4.82
   0   4  -9  101.96    4.97
   0  -4  10   92.61    5.20
   0   4 -10   85.44    4.74
   0  -4  10   85.39    4.69
   0   4 -10   90.62    4.89
   0  -4 -10   81.59    5.63
   0   4  10   84.01    5.01
   0  -4  10   84.70    4.67
   0   4 -10   87.82    4.81
   0   4  10   80.07    5.03
   0  -4  11  112.08    5.88
   0   4 -11  106.81    5.47
   0   4 -11  111.29    5.88
   0  -4  11  100.89    5.28
   0   4  11  120.92    6.15
   0   4 -11  106.24    5.59
   0  -4 -11  118.34    7.01
   0   4 -12   37.96    3.33
   0  -4  12   38.81    3.55
   0   4 -12   43.83    3.83
   0   4 -12   41.31    3.54
   0  -4 -12   40.24    4.34
   0  -4  13   44.53    3.88
   0   4 -13   40.25    3.41
   0  -4 -13   46.30    4.84
   0   4 -13   42.51    3.91
   0   4 -13   43.73    3.92
   0  -4  14    0.99    1.11
   0  -4 -14    3.46    1.80
   0   4  14    1.73    1.00
   0   4 -14   -0.86    1.37
   0   4 -14    2.09    1.31
   0  -4  15  106.14    6.38
   0   4  15  100.25    5.30
   0  -4 -15   98.10    7.54
   0   4  15   98.70    5.68
   0   4 -15   94.56    6.65
   0   4 -15  106.58    6.60
   0  -4  16    5.46    1.74
   0   4  16    0.66    0.98
   0  -4 -16    4.39    2.19
   0   4  16    3.66    1.49
   0   4 -16    2.17    1.42
   0   4 -16    1.63    1.55
   0  -4 -17   30.38    4.66
   0   4  17   28.21    3.50
   0   4 -17   25.37    3.72
   0   4 -17   26.49    3.57
   0  -4  17   28.59    3.58
   0   4  18    6.45    2.11
   0  -4 -18    9.49    3.04
   0   4 -18    7.03    2.32
   0   4 -18    9.50    2.52
   0  -4  18    8.67    2.17
   0   4  19   58.29    5.12
   0  -4 -19   61.61    6.90
   0   4 -19   59.72    5.83
   0   4 -19   65.83    6.08
   0  -4  19   67.83    5.47
   0  -4 -20    7.98    3.25
   0   4 -20    3.84    2.00
   0   4  20    2.14    1.79
   0   4 -20    5.99    2.66
   0  -4  20    1.12    1.37
   0   4 -21    8.51    2.91
   0   4 -21    7.88    2.82
   0  -4 -21    6.64    2.92
   0   6   0   27.69    2.59
   0  -6   0   30.17    2.75
   0   6   0   27.51    2.48
   0  -6   1  439.14   12.20
   0   6   1  427.39   11.49
   0   6  -1  414.95   10.74
   0  -6  -1  401.63   10.63
   0  -6   1  414.27   11.24
   0   6  -1  427.28   10.89
   0   6   1  392.59   10.07
   0  -6  -1  424.42    7.68
   0  -6   2   18.35    2.23
   0  -6  -2   16.95    1.96
   0   6   2   16.37    2.22
   0  -6   2   18.74    2.35
   0  -6  -2   16.75    1.04
   0   6  -2   14.77    1.85
   0   6  -2   12.97    1.93
   0   6   2   18.05    1.88
   0  -6  -2   16.30    0.91
   0   6   3  566.51   14.54
   0  -6   3  547.82   13.64
   0   6  -3  523.00   13.14
   0  -6  -3  573.61   12.47
   0   6   3  550.70   11.74
   0  -6   3  522.05   13.62
   0   6  -3  529.08   12.41
   0  -6  -4 3554.53   52.28
   0  -6   4 3611.73   54.66
   0   6  -4 3616.00   53.34
   0   6  -4 3549.89   53.40
   0  -6   4 3488.81   55.43
   0   6   4 3439.01   51.06
   0   6  -4 3518.21   54.58
   0  -6   5  121.01    5.65
   0  -6  -5  119.88    4.64
   0   6   5  101.38    6.10
   0   6  -5  125.45    5.52
   0   6  -5  123.13    5.52
   0   6  -5   96.20    5.21
   0  -6   5  123.35    6.22
   0   6   5  113.74    4.16
   0  -6  -6  146.99    5.08
   0  -6   6  144.20    6.31
   0   6   6  151.92    7.45
   0   6  -6  143.27    5.93
   0   6  -6  144.09    6.16
   0   6  -6  154.69    6.83
   0   6   6  144.09    4.46
   0  -6   6  150.13    7.10
   0  -6   7    1.30    1.21
   0   6  -7    0.17    0.85
   0  -6   7    0.13    0.89
   0   6   7   -0.21    1.08
   0   6  -7   -0.13    0.79
   0   6   7    0.51    0.36
   0   6  -7    1.11    1.06
   0   6   8   86.88    5.81
   0   6  -8   77.42    4.59
   0  -6   8   78.77    4.77
   0   6  -8   82.61    4.76
   0   6  -8   78.39    5.03
   0  -6   8   88.02    5.57
   0   6   8   87.06    2.79
   0  -6   9  325.19   11.22
   0   6  -9  307.85    9.84
   0  -6   9  306.03    9.94
   0   6  -9  322.70    9.86
   0  -6  10   30.60    3.57
   0   6  10   31.46    1.59
   0   6 -10   32.31    3.18
   0   6  10   31.54    1.71
   0   6 -10   32.45    3.16
   0   6  11   35.91    2.13
   0  -6  11   31.55    3.54
   0   6 -11   32.67    3.40
   0   6 -11   25.17    3.06
   0   6  11   36.33    2.00
   0   6  12   21.73    1.80
   0   6  12   25.41    2.07
   0  -6  12   29.75    3.64
   0   6 -12   26.63    3.21
   0   6 -12   26.22    3.07
   0  -6  13  114.49    7.09
   0   6  13  118.21    4.79
   0   6 -13  108.11    6.61
   0   6  13  118.59    4.54
   0   6 -13  108.67    6.42
   0   6 -14   -0.71    1.33
   0   6  14    0.21    0.82
   0   6 -14   -0.07    1.36
   0   6  14   -0.76    0.99
   0  -6  14    1.97    1.44
   0   6 -15   19.99    3.14
   0  -6  15   21.53    3.16
   0   6 -15   19.05    3.05
   0   6  15   18.52    2.15
   0  -6 -16  125.43    9.05
   0   6  16   99.93    5.35
   0   6 -16  111.58    7.21
   0   6 -16  118.43    7.61
   0  -6  16  110.05    7.44
   0  -6 -17   17.39    4.14
   0   6 -17   22.00    3.44
   0   6 -17   18.25    3.22
   0  -6  17   19.40    3.22
   0  -6 -18    1.94    2.40
   0   6 -18   -0.15    1.67
   0   6 -18    2.02    1.57
   0  -6  18    2.22    1.68
   0  -6 -19   26.67    5.11
   0   6 -19   21.95    3.92
   0   6 -19   24.20    4.02
   0  -6  19   22.50    3.75
   0  -6 -20   -2.96    2.61
   0   6 -20    1.15    1.80
   0   6 -20    0.77    2.10
   0  -6  20   -2.29    1.89
   0   8   0  278.14    9.66
   0  -8   0  281.88    6.88
   0  -8   0  263.77    9.72
   0   8   0  264.66    9.14
   0   8   1   24.50    2.90
   0   8  -1   25.70    2.91
   0   8  -1   24.89    2.85
   0  -8  -1   22.06    2.89
   0   8   1   22.50    2.54
   0  -8   1   23.07    1.97
   0  -8  -1   23.68    1.57
   0   8   2  128.55    6.81
   0   8  -2  126.04    6.08
   0  -8   2  130.70    7.28
   0  -8  -2  125.69    3.52
   0   8   2  133.74    5.90
   0  -8  -2  117.53    6.02
   0   8  -2  118.02    6.15
   0  -8   2  126.15    5.02
   0  -8  -2  123.34    3.31
   0   8  -3    1.36    0.91
   0  -8   3    2.38    1.38
   0  -8   3    1.33    0.99
   0  -8  -3    3.57    1.22
   0   8   3    2.51    1.61
   0   8   3    2.98    1.10
   0   8  -4    8.13    1.75
   0  -8  -4    8.05    1.67
   0   8   4   11.36    2.37
   0  -8   4    8.82    1.76
   0  -8   4    9.28    2.27
   0   8  -4    8.11    1.85
   0   8   4    8.97    1.52
   0   8  -5   30.00    3.03
   0  -8   5   25.32    3.38
   0   8   5   30.24    3.79
   0  -8   5   29.84    3.36
   0  -8  -5   32.52    2.90
   0   8  -5   34.39    3.27
   0   8   5   28.63    2.43
   0   8  -6    4.60    1.47
   0  -8   6    5.44    1.89
   0  -8  -6    6.03    1.49
   0   8  -6    8.35    1.72
   0   8   6    6.00    1.22
   0   8  -7   71.61    4.81
   0   8   7   74.47    3.55
   0  -8   7   77.51    5.76
   0   8  -7   69.14    4.73
   0   8  -8  126.88    6.59
   0   8   8  124.07    4.56
   0   8  -8  123.11    6.35
   0   8  -9   72.50    5.00
   0   8  -9   71.34    4.89
   0   8   9   65.44    2.99
   0   8 -10   60.14    4.66
   0   8 -10   56.50    4.60
   0  -8  10   56.90    5.36
   0   8 -11   41.72    4.00
   0  -8  11   40.04    4.61
   0   8 -11   39.02    3.87
   0  -8  12   31.19    4.16
   0   8 -12   30.63    3.60
   0   8 -12   31.12    3.60
   0   8 -13   48.27    4.59
   0  -8  13   57.62    5.52
   0   8 -13   55.66    5.10
   0  -8  14   -0.38    1.42
   0   8 -14    3.72    1.99
   0   8 -14    1.67    1.61
   0  -8  15   23.26    3.71
   0   8 -15   21.02    3.62
   0   8 -15   23.19    3.66
   0  -8  16   76.48    6.92
   0   8 -16   65.24    6.05
   0   8 -16   68.83    6.04
   0   8 -17   10.05    2.58
   0  -8  17    9.47    2.77
   0   8 -17   10.10    2.78
   0   8 -18   -1.93    1.77
   0  -8  18   -2.61    1.88
   0   8 -18    2.45    2.09
   0   8 -19   10.95    3.29
   0   8 -19    7.04    2.91
   0  -8  19   10.68    3.11
   0 -10   0 1674.83   27.17
   0  10   0 1775.57   33.64
   0 -10   0 1798.97   34.80
   0 -10   0 1681.54   28.19
   0  10  -1  164.08    8.02
   0  10   1  158.11    8.12
   0 -10  -1  166.41    8.43
   0 -10   1  165.81    8.63
   0 -10   1  152.26    5.61
   0 -10  -1  147.65    4.67
   0 -10  -1  149.27    5.01
   0 -10  -2   22.09    1.44
   0 -10   2   27.94    2.49
   0 -10  -2   21.16    1.36
   0 -10  -2   30.06    3.52
   0  10  -2   38.55    3.99
   0  10   2   27.86    3.57
   0 -10   2   30.64    3.82
   0  10  -3   -0.57    1.26
   0 -10   3    1.77    1.16
   0 -10  -3   -0.81    1.17
   0 -10   3   -0.38    1.49
   0  10   3   -0.45    1.26
   0 -10  -4  503.14   14.55
   0  10   4  518.51   16.55
   0  10   4  441.20   12.75
   0 -10   4  461.93   15.93
   0  10  -4  472.32   14.00
   0  10  -4  450.93   14.07
   0 -10   4  447.83   12.36
   0 -10  -5    4.94    1.69
   0  10   5    7.75    2.36
   0 -10   5    1.83    1.72
   0  10   5    6.92    1.58
   0  10  -5    6.60    1.85
   0  10  -5    7.85    2.07
   0 -10   5    4.78    1.41
   0  10  -6   99.23    6.21
   0  10   6  123.66    8.23
   0 -10  -6  108.47    6.21
   0  10  -6  110.85    6.65
   0 -10   6  113.04    7.83
   0  10   6   98.11    5.10
   0  10  -7    1.41    1.50
   0 -10   7   -1.53    1.94
   0  10   7    4.00    1.73
   0  10   7   -0.10    0.83
   0  10  -7    0.10    1.59
   0  10  -8   30.32    3.62
   0  10   8   29.48    4.57
   0 -10   8   36.64    4.70
   0  10  -8   36.13    4.03
   0  10   8   22.96    2.36
   0 -10   9   -1.84    1.41
   0  10  -9   -1.53    1.56
   0  10  -9    0.27    1.22
   0 -10  10   39.73    5.00
   0  10 -10   35.89    4.03
   0  10 -10   26.71    3.52
   0  10 -11   -0.30    1.54
   0  10 -11    1.61    1.34
   0 -10  12   14.73    3.23
   0  10 -12   18.70    3.16
   0  10 -12   14.24    3.02
   0 -10  13   12.27    3.31
   0  10 -13   12.67    2.91
   0  10 -13   13.34    2.83
   0 -10  14   74.58    7.31
   0  10 -14   63.38    5.89
   0  10 -14   67.25    5.88
   0 -10  15    2.79    2.25
   0  10 -15   -1.05    1.92
   0  10 -15    2.58    1.89
   0 -10  16    7.36    2.69
   0  10 -16    5.24    2.27
   0  10 -16    7.05    2.80
   0 -12   0   65.64    6.10
   0  12   0   68.32    5.79
   0 -12   0   60.30    3.57
   0  12  -1   12.84    2.53
   0  12   1   11.17    2.66
   0 -12  -1    9.64    2.95
   0 -12   1    5.13    2.28
   0 -12   1    9.90    1.81
   0  12  -2   25.48    3.57
   0  12   2   19.57    3.37
   0 -12   2   20.16    2.52
   0 -12   2   21.99    3.73
   0 -12  -2   20.94    3.47
   0  12  -3    1.89    1.64
   0 -12   3    1.56    1.11
   0  12  -3    2.84    1.56
   0  12   3    4.90    2.21
   0 -12  -3    1.80    1.69
   0 -12   3    3.63    2.45
   0  12  -4    6.24    1.98
   0 -12   4    5.10    1.89
   0  12  -4   10.74    2.51
   0 -12  -4    9.95    2.53
   0 -12   4    3.53    2.06
   0  12   4    9.43    2.72
   0  12  -5   50.24    4.97
   0 -12  -5   50.55    4.88
   0  12   5   51.91    5.70
   0 -12   5   54.20    5.91
   0  12  -5   43.62    4.44
   0  12  -6   15.92    3.14
   0 -12  -6   15.44    2.99
   0 -12   6   19.31    3.95
   0  12   6   22.53    3.84
   0  12  -6   19.34    3.07
   0 -12   7   30.18    4.76
   0  12  -7   25.84    3.66
   0  12  -7   22.81    3.60
   0  12   8   13.11    3.45
   0 -12   8   16.07    3.78
   0  12  -8   10.65    2.64
   0  12  -8   11.37    2.62
   0  12  -9   57.97    5.63
   0  12   9   68.44    7.12
   0 -12   9   61.16    6.81
   0  12  -9   69.31    5.76
   0  12  10    3.18    2.80
   0 -12  10    3.48    2.64
   0  12 -10   -0.23    1.50
   0  12 -10    2.83    1.84
   0  12  11   12.80    3.76
   0 -12  11   19.47    4.22
   0  12 -11   14.45    3.13
   0  12 -11   15.70    3.14
   0 -12  12   11.11    3.92
   0  12  12   13.15    3.69
   0  12 -12   17.75    3.45
   0  12 -12   10.13    2.65
   0 -12  13   13.76    3.84
   0  12 -13   11.15    2.91
   0  12 -13   10.49    2.84
   0 -14   0  200.95   11.72
   0  14   0  206.16   10.84
   0 -14   1    2.58    2.05
   0 -14  -1    7.42    2.78
   0  14   1    7.92    2.85
   0  14  -1   10.49    3.35
   0  14  -2   15.66    3.41
   0 -14   2   18.99    4.13
   0 -14  -2   17.02    3.58
   0  14   2   14.81    3.39
   0  14  -2   23.70    3.76
   0  14  -3    1.14    1.57
   0 -14   3    2.21    2.44
   0 -14  -3    0.49    1.77
   0  14  -3    0.94    1.43
   0  14   3    1.82    1.72
   0  14  -4  182.32   10.37
   0 -14  -4  207.87   11.31
   0 -14   4  210.61   12.67
   0  14   4  222.47   12.06
   0  14  -4  204.10   10.55
   0  14  -5   -2.32    1.95
   0  14   5   -0.80    2.41
   0 -14   5   -2.16    2.14
   0  14  -5    0.08    1.73
   0  14  -6   65.18    6.24
   0  14  -6   54.81    5.78
   0 -14   6   56.09    6.82
   0  14  -7    4.57    2.03
   0  14   7    8.13    2.97
   0 -14   7    3.49    2.60
   0  14  -7    3.20    2.42
   0  14  -8   -3.91    2.04
   0 -14   8   -1.56    1.70
   0 -14   8    2.10    2.33
   0  14   8    1.73    2.96
   0  14  -8    3.23    2.16
   1   1 -22   -0.51    1.93
   1  -1 -22    7.05    3.55
   1  -1 -21    0.33    1.80
   1   1 -21    1.67    2.11
   1   1 -20   -1.95    1.91
   1  -1 -20    0.33    1.82
   1   1 -20   -0.95    1.65
   1  -1 -19  253.43   12.51
  -1  -1  19  221.73    8.23
   1   1 -19  257.74   11.99
   1   1 -19  257.78   12.13
   1   1 -18   91.08    6.77
   1  -1 -18  100.07    7.54
  -1  -1  18   87.88    4.87
   1   1 -17   -1.46    1.44
   1  -1 -17    1.11    1.62
  -1  -1  17    0.57    0.89
   1  -1 -16   53.71    5.22
  -1  -1  16   52.21    3.65
   1   1 -16   47.01    4.49
   1   1 -16   54.10    4.79
   1   1 -15    1.69    1.31
   1   1 -15    0.68    1.22
   1  -1 -15    3.14    1.86
  -1   1  15    2.50    0.71
  -1  -1  15    2.41    0.88
   1   1 -14    5.92    1.92
   1  -1 -14    3.69    1.44
   1   1 -14    6.24    1.75
  -1  -1  14    5.03    1.27
  -1   1  14    6.00    0.93
   1   1 -13    2.47    0.93
   1  -1 -13    2.58    1.28
   1   1 -13    4.46    1.42
  -1   1  13    2.78    0.70
  -1  -1  13    4.32    1.06
   1   1 -13    6.71    1.76
   1  -1 -13    4.11    1.59
  -1  -1  13    4.31    1.31
  -1   1  13    3.45    1.33
   1   1 -12    1.87    0.62
  -1   1  12    2.09    0.58
  -1  -1  12    3.28    1.00
   1   1 -12    2.63    1.19
   1  -1 -12    3.17    1.35
  -1   1  12    3.91    1.36
   1   1 -12    3.36    1.28
   1  -1 -12    3.69    1.52
  -1  -1  12    1.80    1.07
  -1  -1  12    1.32    0.70
  -1   1  12    3.00    1.09
  -1   1  11 1048.20   16.77
  -1  -1  11 1084.45   19.15
   1   1 -11 1047.40   18.43
  -1  -1  11 1088.79   21.02
   1  -1 -11 1061.27   21.71
  -1   1  11 1127.45   21.54
   1   1 -11 1077.85   21.45
  -1   1  11 1056.62   20.35
   1   1 -11 1096.83   20.98
  -1  -1  11 1070.77   20.08
  -1   1  10  502.05    8.88
   1   1 -10  497.87   10.34
  -1  -1  10  492.84   10.77
   1  -1 -10  491.24   12.68
   1   1 -10  519.01   12.53
  -1   1  10  502.05   12.40
  -1   1  10  529.33   11.84
   1   1 -10  515.79   12.06
  -1  -1  10  496.12   11.35
  -1   1   9   33.39    1.57
   1   1  -9   34.50    2.15
  -1  -1   9   34.48    2.31
  -1  -1   9   41.29    2.97
   1  -1  -9   29.90    2.75
   1   1  -9   35.43    2.82
  -1   1   9   34.33    2.75
  -1  -1   9   33.08    2.42
  -1   1   9   34.21    2.52
   1   1  -9   37.10    2.71
   1  -1  -9   29.38    2.59
   1   1  -8    0.29    0.69
  -1   1   8    0.63    0.36
  -1  -1   8    0.60    0.68
   1  -1  -8   -0.34    0.90
   1  -1  -8    1.64    1.05
  -1   1   8    0.39    0.83
   1   1  -8   -0.07    0.78
  -1  -1   8   -0.32    0.75
   1   1  -8   -0.87    0.70
  -1   1   8   -0.49    0.64
  -1  -1   8    0.07    0.56
  -1   1   7   65.78    1.90
  -1  -1   7   59.23    2.71
   1   1  -7   60.82    2.68
  -1  -1   7   61.23    3.14
   1  -1  -7   64.32    3.38
   1  -1  -7   65.35    3.36
  -1   1   7   62.39    3.28
   1   1  -7   57.30    3.28
  -1  -1   7   61.35    2.93
   1   1  -7   60.40    2.99
  -1   1   7   62.36    3.10
  -1  -1   6  468.22    9.27
   1   1  -6  479.10    9.17
  -1   1   6  488.93    7.54
  -1  -1   6  484.78    9.91
   1  -1  -6  487.57   10.24
   1   1  -6  482.98   10.10
   1  -1  -6  487.43   10.37
  -1   1   6  479.59   10.14
   1   1  -6  481.44    9.66
  -1  -1   6  475.78    9.46
  -1   1   6  492.24    9.93
   1   1  -5    6.28    0.84
  -1   1   5    5.80    0.44
  -1  -1   5    7.73    0.90
  -1  -1   5    7.59    0.97
  -1   1   5    5.85    0.93
   1  -1  -5    5.26    0.99
   1  -1  -5    5.05    1.00
  -1   1   5    5.92    0.97
   1   1  -5    6.37    0.92
   1   1  -5    7.78    0.92
  -1  -1   5    6.99    0.88
  -1  -1   4  952.08   15.33
   1   1  -4  974.38   15.32
   1   1  -4  964.70   15.69
  -1  -1   4 1001.72   15.73
   1  -1  -4  975.98   15.98
  -1   1   4  970.20   15.84
  -1  -1   4  985.21   15.22
   1   1  -4 1014.49   15.35
  -1   1   4  992.13   15.78
  -1  -1   3 1588.96   22.70
   1   1  -3 1634.27   22.73
   1   1  -3 1638.48   22.81
  -1   1   3 1591.87   23.04
   1  -1  -3 1596.54   23.19
  -1   1   3 1566.15   22.81
  -1  -1   3 1571.93   22.34
   1   1  -3 1680.24   22.42
   1   1  -2  396.58    6.83
   1  -1  -2  395.98    7.09
  -1  -1   2  384.84    6.92
   1   1   2  213.78    3.94
   1  -1   2  207.06    4.10
  -1   1  -2  209.84    4.10
  -1   1  -2  211.52    4.52
  -1   1  -2  200.35    4.21
  -1   1  -3    2.90    0.57
   1  -1   3    2.56    0.62
   1  -1   3    1.88    0.55
  -1  -1  -3    3.86    0.88
   1   1   3    2.98    0.73
  -1   1  -3    3.36    0.66
  -1   1  -3    2.56    0.68
   1  -1   3    1.95    0.53
  -1   1  -4  230.58    5.16
   1  -1   4  225.39    5.22
  -1   1  -4  218.77    5.15
   1  -1   4  214.70    5.08
   1   1   4  196.75    5.18
  -1   1  -4  240.71    5.36
   1  -1   4  217.73    5.10
   1   1   4  221.09    5.46
  -1   1  -5  821.58   13.55
   1  -1   5  797.54   13.72
   1  -1   5  831.49   13.96
  -1  -1  -5  814.84   14.88
  -1   1  -5  795.42   13.99
   1   1   5  809.01   14.33
   1   1   5  786.48   14.17
   1  -1   5  802.04   13.94
  -1   1  -5  821.57   14.11
  -1   1  -6  203.73    5.25
   1  -1   6  217.36    5.56
  -1  -1  -6  190.40    6.02
   1  -1   6  210.13    5.80
  -1   1  -6  214.59    6.01
   1   1   6  199.12    5.96
   1   1   6  197.05    5.88
  -1   1  -6  198.62    5.71
   1  -1   6  205.87    5.74
  -1   1  -7   15.88    1.38
   1  -1   7   17.24    1.58
  -1  -1  -7   16.69    0.84
   1   1   7   15.63    0.89
  -1  -1  -7   13.81    1.80
   1  -1   7   15.15    1.65
   1   1   7   16.67    1.82
  -1   1  -7   14.70    1.70
   1  -1   7   14.84    1.52
  -1   1  -7   14.35    1.61
   1   1   7   14.23    1.62
  -1   1  -8   16.85    1.50
  -1  -1  -8   18.47    0.96
   1   1   8   18.43    1.11
  -1  -1  -8   19.02    2.15
  -1   1  -8   11.99    1.62
   1   1   8   18.20    2.03
   1  -1   8   14.47    1.77
   1  -1   8   13.60    1.59
   1   1   8   18.41    1.91
  -1   1  -8   16.86    1.94
   1  -1   9 1648.14   26.23
  -1   1  -9 1596.07   25.61
   1   1   9 1615.27   23.54
   1  -1   9 1702.95   27.69
  -1  -1  -9 1662.43   28.80
  -1   1  -9 1662.21   27.99
   1   1   9 1641.71   28.09
   1   1   9 1656.20   27.49
   1  -1   9 1650.09   27.18
  -1   1  -9 1571.86   27.56
  -1   1 -10 1368.51   22.88
   1  -1  10 1423.04   23.75
   1  -1  10 1377.59   24.99
  -1  -1 -10 1415.21   26.30
   1   1  10 1430.73   25.70
  -1   1 -10 1455.02   25.79
   1  -1  10 1436.90   24.83
   1   1  10 1429.56   25.12
  -1   1 -10 1408.17   25.45
   1  -1  11   29.75    2.40
  -1   1 -11   30.82    2.20
  -1  -1 -11   31.09    3.11
   1  -1  11   25.42    2.64
  -1   1 -11   26.56    2.91
   1   1  11   33.31    3.00
  -1   1 -11   29.09    2.94
   1  -1  11   29.81    2.65
   1   1  11   32.97    2.88
   1  -1  12   23.04    2.18
  -1   1 -12   21.53    1.93
  -1  -1 -12   19.93    2.74
  -1   1 -12   19.75    2.63
  -1   1 -12   20.33    2.67
   1  -1  12   20.17    2.46
   1   1  12   18.93    2.26
  -1  -1 -13    2.74    1.57
  -1   1 -13   -0.06    0.98
  -1   1 -13    0.28    0.65
  -1   1 -13    2.86    1.47
   1  -1  13    1.76    0.71
   1  -1  14   53.18    3.49
  -1   1 -14   49.03    3.06
  -1  -1 -14   52.84    4.77
  -1   1 -14   51.02    4.42
  -1   1 -14   56.63    4.56
  -1  -1 -15    6.76    2.18
  -1   1 -15    2.32    1.39
  -1   1 -15    6.19    1.32
   1  -1  15    5.25    1.32
  -1   1 -15    4.95    1.71
  -1   1 -16   12.26    2.60
  -1  -1 -16    9.67    2.53
  -1   1 -16    7.31    1.99
   1  -1  16    6.96    1.46
  -1  -1 -17  203.47   10.63
  -1   1 -17  193.15    9.83
   1  -1  17  197.00    7.42
  -1   1 -17  205.57    9.87
  -1  -1 -18  565.93   19.21
  -1   1 -18  553.53   17.86
  -1  -1 -19   44.81    5.65
  -1   1 -19   44.98    5.29
  -1   1 -19   47.69    5.19
  -1   1 -20    2.21    2.07
   1   1  20    4.86    2.45
  -1  -1 -20    4.67    2.46
  -1   1 -21    8.87    3.29
   1   1  21    6.32    2.62
  -1  -1 -21    5.20    2.50
  -1   1 -22   13.38    3.64
  -1  -1 -22    6.22    2.83
   1   1  22    6.33    2.53
  -1   3  22    2.49    2.10
   1   3 -22   -2.13    2.18
   1  -3 -22    2.84    2.69
   1   3 -22    2.89    2.09
  -1   3  21   17.30    3.27
   1  -3 -21   31.57    5.34
   1   3 -21   22.44    4.11
   1   3 -21   21.66    3.89
   1  -3 -20   45.72    6.01
  -1   3  20   41.72    4.75
   1   3 -20   33.65    4.52
  -1  -3  20   32.54    3.70
   1   3 -20   43.08    5.11
   1  -3 -19   -0.57    1.89
   1   3 -19    2.22    1.78
   1   3 -19    2.74    1.88
  -1  -3  19    2.62    1.66
   1  -3 -18   50.91    5.89
   1   3 -18   42.90    4.63
   1   3 -18   45.21    4.95
  -1  -3  18   46.94    4.24
   1  -3 -17   12.23    2.93
   1   3 -17    5.34    1.65
   1   3 -17   12.10    2.76
  -1  -3  17    9.47    2.07
   1  -3 -16   45.95    4.98
   1   3 -16   35.25    3.32
  -1  -3  16   48.29    4.03
   1   3 -16   42.51    4.39
   1   3 -16   43.99    4.34
  -1   3  15  157.33    6.80
  -1  -3  15  156.59    7.25
   1   3 -15  146.62    6.63
   1  -3 -15  173.49    9.35
   1   3 -15  158.54    8.06
   1   3 -15  174.66    8.12
  -1   3  14   21.19    2.36
   1   3 -14   20.04    2.37
   1  -3 -14   20.97    3.21
  -1  -3  14   14.82    2.35
   1   3 -14   17.04    2.86
   1   3 -14   15.47    2.39
   1   3 -13    1.13    0.71
   1  -3 -13    0.88    1.22
  -1  -3  13    2.67    1.09
   1   3 -13    0.21    1.08
   1   3 -13    1.66    1.22
   1   3 -12   11.33    1.71
  -1  -3  12   12.23    1.83
  -1   3  12   12.94    1.97
   1   3 -12    9.54    1.96
  -1  -3  12   12.02    1.96
   1   3 -12   10.33    2.17
   1  -3 -12    8.33    2.22
   1  -3 -11  134.02    7.07
   1   3 -11  135.26    5.70
  -1  -3  11  129.82    5.84
  -1  -3  11  121.81    5.99
  -1  -3  11  133.38    5.71
   1   3 -11  133.04    6.33
  -1   3  11  134.48    6.28
   1   3 -11  134.33    5.95
  -1   3  11  135.73    6.07
   1  -3 -10   24.40    3.03
  -1  -3  10   21.74    2.34
   1   3 -10   22.56    2.28
  -1  -3  10   19.19    2.34
   1   3 -10   20.13    2.42
  -1   3  10   21.29    2.39
  -1  -3  10   22.04    2.26
   1   3 -10   20.68    2.35
  -1   3  10   24.38    2.45
  -1   3   9    0.12    0.92
   1  -3  -9    0.31    0.96
   1   3  -9    1.98    0.96
  -1  -3   9    3.38    1.07
  -1  -3   9    1.99    0.91
  -1   3   9    0.47    0.73
   1   3  -9    1.80    0.99
  -1  -3   9    1.56    0.96
   1   3  -9    2.91    1.16
   1  -3  -8  688.28   15.93
   1   3  -8  669.44   14.09
  -1  -3   8  657.86   14.49
   1   3  -8  672.07   14.20
  -1  -3   8  658.32   14.08
  -1  -3   8  681.12   13.95
  -1   3   8  715.85   14.94
   1   3  -8  681.73   13.96
  -1   3   8  697.78   14.81
  -1   3   7  735.42   15.41
   1  -3  -7  730.31   16.42
   1   3  -7  760.39   15.02
  -1  -3   7  742.72   15.26
   1   3  -7  755.10   14.92
  -1  -3   7  751.88   15.05
  -1  -3   7  759.65   14.54
  -1   3   7  765.10   15.34
   1   3  -7  761.91   14.48
  -1   3   6    1.42    0.48
   1  -3  -6    0.30    0.91
  -1   3   6    0.46    0.71
   1   3  -6    1.11    0.74
  -1   3   6    1.25    0.27
  -1  -3   6    1.18    0.93
  -1  -3   6    1.23    0.77
   1   3  -6    0.31    0.69
  -1  -3   6    0.25    0.60
   1   3  -6    0.13    0.63
  -1   3   5    1.97    0.38
  -1   3   5    2.04    0.40
  -1  -3   5    1.54    0.73
   1   3  -5    2.82    0.83
  -1  -3   5    0.30    0.64
   1   3  -5    1.84    0.88
  -1   3   5    1.86    0.77
  -1  -3   5    2.46    0.62
   1   3  -5    1.17    0.62
  -1   3   4  158.67    5.51
   1   3  -4  133.81    4.39
  -1  -3   4  144.71    5.03
  -1   3   4  156.49    3.63
   1   3  -4  157.73    5.07
  -1  -3   4  147.71    4.79
   1   3  -4  143.91    4.63
  -1  -3   3 2731.91   39.52
   1  -3  -3 2763.85   38.32
   1   3  -3 2722.75   39.06
   1   3  -3 2761.27   39.28
  -1   3   3 2768.81   37.95
  -1  -3   3 2727.21   40.10
   1   3  -3 2708.28   39.74
   1   3  -2 2335.97   34.17
  -1  -3   2 2310.13   34.66
  -1   3   2 2390.64   33.45
   1   3  -2 2311.03   34.44
   1  -3  -2 2332.36   33.71
  -1  -3   2 2372.07   34.64
  -1  -3   1  102.65    3.69
   1   3  -1  106.78    3.62
   1  -3  -1  109.48    3.72
  -1   3   1  109.73    3.55
  -1   3   1  111.94    4.04
   1   3  -1  103.85    3.74
  -1  -3   1  109.81    4.01
   1  -3  -1  105.19    2.50
  -1  -3   0  204.34    5.99
  -1   3   0  183.68    5.13
   1  -3   0  190.63    5.54
   1   3   0  213.49    5.76
  -1  -3   0  197.50    4.00
   1   3   0  206.76    5.07
  -1   3   0  190.14    5.22
  -1  -3   0  201.26    5.16
   1  -3   1 9615.23  130.27
   1   3   1 9541.08  131.45
  -1   3  -1 9756.25  129.74
   1  -3   1 9999.00  131.05
  -1   3  -1 9864.50  130.67
   1  -3   2 1160.33   18.90
  -1   3  -2 1204.81   18.63
  -1   3  -2 1197.01   18.96
  -1   3  -2 1201.30   19.74
  -1  -3  -2 1176.78   18.02
   1  -3   2 1170.84   19.86
   1   3   2 1147.16   17.69
   1  -3   3    2.36    0.93
   1  -3   3    2.22    0.62
  -1   3  -3    2.73    0.74
   1   3   3    2.12    0.80
  -1   3  -3    2.44    0.67
  -1  -3  -3    3.16    0.56
   1   3   3    3.29    0.49
  -1   3  -3    2.09    0.74
   1   3   4   81.12    2.12
  -1   3  -4   77.15    3.56
   1  -3   4   76.00    3.67
   1   3   4   72.31    3.84
   1  -3   4   74.72    3.17
  -1   3  -4   73.12    3.15
  -1   3  -4   77.60    3.30
   1  -3   4   75.59    3.27
   1   3   4   80.66    2.20
  -1  -3  -5  809.97   11.75
   1  -3   5  811.85   14.60
  -1   3  -5  813.31   14.52
   1   3   5  774.15   16.00
  -1  -3  -5  745.75   16.17
   1   3   5  803.15   12.74
  -1   3  -5  789.05   14.57
   1  -3   5  782.58   14.81
   1  -3   5  822.54   15.75
  -1   3  -5  786.77   15.19
  -1   3  -6  858.09   16.56
   1  -3   6  872.58   16.98
  -1  -3  -6  859.36   18.28
   1   3   6  891.10   14.53
   1   3   6  897.11   17.64
  -1   3  -6  874.72   15.99
   1  -3   6  867.89   15.96
   1  -3   6  877.50   16.17
  -1   3  -6  885.73   16.14
  -1   3  -7    2.99    0.95
   1  -3   7    2.24    1.16
   1  -3   7    2.30    0.82
  -1  -3  -7   -0.09    1.20
   1   3   7    1.78    1.20
  -1   3  -7    1.93    0.84
   1  -3   7    2.99    1.01
  -1   3  -7    3.74    1.21
  -1   3  -8  644.67   13.88
   1  -3   8  641.97   14.35
   1  -3   8  623.18   13.55
  -1   3  -8  639.97   13.79
  -1  -3  -8  612.51   15.54
   1   3   8  683.44   14.74
   1  -3   8  643.92   13.61
   1   3   8  654.57   14.62
  -1   3  -8  668.77   14.09
  -1   3  -9   85.41    4.38
   1  -3   9   80.23    4.41
  -1   3  -9   80.85    4.66
   1  -3   9   89.07    4.45
  -1  -3  -9   74.58    5.29
   1   3   9   88.95    4.80
   1  -3   9   84.68    4.37
   1   3   9   90.31    4.75
  -1   3  -9   82.86    4.42
  -1   3 -10  176.12    6.52
  -1  -3 -10  167.37    8.14
   1  -3  10  172.35    6.72
   1  -3  10  180.67    6.74
   1   3  10  177.15    7.19
  -1   3 -10  175.81    7.07
   1   3  10  171.20    6.95
  -1   3 -10  186.12    7.01
  -1   3 -11   -0.38    0.84
   1  -3  11   -0.06    0.76
   1  -3  11    0.43    1.09
  -1   3 -11    1.34    1.00
   1  -3  11    0.37    0.76
  -1   3 -11    0.62    0.88
   1   3  11    0.88    1.03
  -1  -3 -11   -0.31    1.21
   1  -3  12   38.64    3.35
  -1   3 -12   39.47    3.08
  -1   3 -12   34.37    3.29
  -1   3 -12   32.75    3.24
  -1  -3 -12   42.12    4.22
  -1   3 -13   39.60    3.25
   1  -3  13   37.80    3.42
  -1  -3 -13   36.72    4.24
  -1   3 -13   36.97    3.77
  -1   3 -13   36.16    3.47
   1  -3  14  346.43   11.05
  -1   3 -14  322.38   10.12
  -1  -3 -14  360.76   13.69
  -1   3 -14  351.41   12.03
  -1   3 -14  339.05   11.81
   1  -3  15   48.41    4.02
  -1   3 -15   45.17    3.62
  -1  -3 -15   41.07    4.63
  -1   3 -15   43.10    4.35
  -1   3 -15   43.99    4.32
   1  -3  16  196.25    8.43
  -1   3 -16  169.80    7.35
   1   3  16  197.98    8.87
  -1  -3 -16  191.24   10.61
  -1   3 -16  200.66    9.48
  -1   3 -16  196.84    9.38
   1   3  17   58.85    5.00
  -1  -3 -17   61.95    6.53
  -1   3 -17   56.65    5.27
  -1   3 -17   63.77    5.60
   1  -3  17   55.69    4.64
  -1  -3 -18   71.16    6.98
   1   3  18   74.68    5.80
  -1   3 -18   70.10    6.17
   1  -3  18   79.73    5.57
  -1   3 -18   80.99    6.58
  -1  -3 -19    5.97    2.44
  -1   3 -19    9.97    2.74
   1   3  19   11.98    2.86
  -1   3 -19    3.94    1.93
   1  -3  19    9.72    2.13
  -1   3 -20   -1.15    1.87
  -1  -3 -20    1.24    2.40
   1   3  20    5.21    2.24
  -1   3 -20    3.01    1.84
  -1  -3 -21   10.01    3.50
  -1   3 -21    6.32    2.24
   1   3  21    7.85    2.55
  -1   3 -21    6.05    2.44
  -1  -3 -22   20.40    4.84
  -1   3 -22   25.04    4.62
  -1   3 -22   25.36    4.38
   1   3  22   26.41    4.27
   1  -5 -21    6.22    3.08
   1   5 -21    6.43    2.38
   1   5 -21    7.40    2.87
  -1  -5  21    3.42    1.93
   1  -5 -20   57.51    6.98
   1   5 -20   51.43    5.76
   1   5 -20   50.14    5.66
  -1  -5  20   52.33    5.24
  -1   5  19   87.65    5.96
   1  -5 -19  104.39    8.89
   1   5 -19   96.98    7.33
   1   5 -19   92.12    7.45
  -1  -5  19   89.81    6.74
  -1  -5  18    1.10    1.42
   1   5 -18    2.46    1.48
   1  -5 -18    0.07    1.93
   1   5 -18    0.92    2.02
  -1   5  18    0.42    1.42
   1  -5 -17   10.62    3.11
  -1   5  17    8.64    1.95
   1   5 -17   12.48    2.65
   1   5 -17    6.13    2.28
  -1  -5  17   11.56    2.51
  -1  -5  16   46.39    4.59
   1   5 -16   41.08    4.48
   1   5 -16   35.78    4.01
   1  -5 -16   44.94    5.36
  -1   5  16   41.35    3.64
  -1   5  15  770.04   16.81
  -1  -5  15  787.00   20.31
   1   5 -15  823.45   20.81
  -1   5  15  763.80   17.42
   1  -5 -15  755.22   22.60
   1   5 -15  819.89   20.22
   1  -5 -14   31.22    4.18
  -1   5  14   28.49    2.67
   1   5 -14   34.52    3.65
   1   5 -14   26.93    3.43
  -1   5  14   28.20    2.52
  -1  -5  13  156.73    7.81
   1   5 -13  145.44    7.51
   1  -5 -13  154.78    8.83
  -1   5  13  159.71    6.04
  -1   5  13  145.99    5.50
   1   5 -13  155.95    7.38
  -1  -5  12   37.77    3.73
  -1   5  12   33.20    2.52
   1  -5 -12   30.13    3.79
   1   5 -12   32.03    3.60
   1   5 -12   30.34    3.21
  -1   5  12   30.63    2.28
  -1   5  11   16.94    1.55
   1   5 -11   12.88    2.19
  -1  -5  11   16.53    2.40
   1   5 -11   12.54    2.05
   1   5 -11   16.72    2.37
  -1   5  11   18.42    1.82
   1  -5 -11   14.93    2.60
  -1   5  10   53.31    2.49
  -1   5  10   54.30    2.72
  -1   5  10   53.05    4.23
  -1  -5  10   49.75    3.99
   1   5 -10   45.88    3.70
   1   5 -10   52.88    3.91
  -1  -5  10   51.46    3.96
  -1  -5  10   46.31    3.52
   1   5 -10   47.04    3.66
  -1   5   9   46.70    2.07
  -1   5   9   47.23    2.27
  -1   5   9   41.26    3.62
  -1  -5   9   46.20    3.82
   1   5  -9   48.51    3.61
   1   5  -9   39.38    3.41
  -1  -5   9   43.81    3.61
  -1  -5   9   44.46    3.34
   1   5  -9   42.31    3.32
  -1   5   8  187.90    7.95
  -1   5   8  189.20    4.45
   1   5  -8  200.95    7.63
  -1   5   8  190.49    4.07
  -1  -5   8  199.66    7.93
   1   5  -8  197.45    7.14
  -1  -5   8  193.57    7.24
   1   5  -8  194.14    6.95
  -1   5   8  189.56    4.15
  -1   5   7  257.59    4.84
  -1   5   7  302.50   10.07
   1   5  -7  278.33    8.93
  -1  -5   7  286.51    9.46
  -1   5   7  301.99    5.94
  -1  -5   7  283.24    8.80
   1   5  -7  287.70    8.63
   1   5  -7  279.51    8.30
  -1   5   7  266.14    4.66
  -1   5   6   -0.82    1.41
   1   5  -6   -0.38    0.88
  -1  -5   6   -0.15    0.85
   1   5  -6   -1.11    0.81
  -1   5   6    0.59    0.44
  -1  -5   6    0.36    0.90
   1   5  -6    0.26    0.86
   1  -5  -5    8.29    1.18
  -1   5   5    5.28    1.58
   1   5  -5    7.04    1.35
   1   5  -5    7.53    1.40
  -1   5   5    7.74    1.07
  -1  -5   5    6.20    1.37
   1   5  -5    5.65    1.32
  -1  -5   5    5.77    1.32
   1  -5  -4  187.80    5.70
  -1  -5   4  187.60    6.68
   1   5  -4  179.79    6.13
   1   5  -4  185.06    6.65
  -1  -5   4  185.79    7.06
  -1   5   4  189.05    5.39
   1   5  -4  178.94    6.17
   1   5  -3  319.79    8.43
  -1  -5   3  305.53    8.88
   1  -5  -3  313.59    7.97
   1   5  -3  300.46    8.65
  -1   5   3  297.83    7.46
  -1  -5   3  293.38    8.86
   1   5  -2   15.06    1.71
  -1  -5   2   19.74    2.21
  -1   5   2   18.21    2.20
  -1  -5   2   18.36    2.07
   1  -5  -2   20.33    2.00
   1   5  -2   16.78    1.86
  -1   5   2   22.20    1.88
   1  -5  -2   19.01    1.01
   1  -5  -1   23.17    2.24
   1   5  -1   23.20    2.16
  -1  -5   1   21.97    2.17
  -1   5   1   22.43    2.05
  -1  -5   1   23.85    2.51
   1   5  -1   21.20    2.10
  -1  -5   1   21.33    1.58
  -1   5   0  112.25    4.66
   1   5   0  114.45    4.57
  -1  -5   0  122.28    4.87
  -1  -5   0  121.47    3.48
   1   5   0  116.54    5.11
  -1   5   0  107.74    4.66
  -1   5  -1    3.30    1.06
  -1  -5  -1    3.73    0.55
   1  -5   1    1.85    0.95
   1  -5   1    4.18    1.11
   1   5   1    4.50    1.29
  -1   5  -1    3.59    1.06
  -1  -5  -1    2.96    0.90
   1  -5   2  508.02   11.67
   1   5   2  485.63   12.32
  -1   5  -2  494.02   10.70
  -1  -5  -2  474.53   10.38
   1   5   2  477.16    9.97
   1  -5   2  452.55   11.62
  -1   5  -2  469.98   11.38
  -1  -5  -2  442.90    7.27
  -1  -5  -3   13.32    1.50
   1  -5   3   12.87    1.91
   1  -5   3   13.70    1.77
  -1   5  -3   11.67    1.54
  -1   5  -3   11.30    1.61
   1   5   3   14.47    1.39
  -1   5  -3   12.16    1.76
   1  -5   4    0.26    0.95
  -1  -5  -4   -0.31    0.66
   1   5   4    0.20    1.10
   1  -5   4    0.54    0.79
  -1   5  -4    0.37    0.88
  -1   5  -4    0.60    0.81
   1   5   4    0.04    0.50
  -1   5  -4    1.79    1.05
   1  -5   5   78.21    4.10
   1   5   5   72.97    4.78
  -1   5  -5   83.13    4.01
  -1   5  -5   80.18    4.16
  -1  -5  -5   75.57    3.15
   1  -5   5   86.65    4.83
   1   5   5   76.11    2.86
  -1   5  -5   83.74    4.59
  -1  -5  -6  556.91   10.46
   1   5   6  577.64   14.96
  -1   5  -6  570.92   12.59
   1  -5   6  571.19   13.05
  -1   5  -6  589.34   12.98
   1  -5   6  568.57   14.25
   1   5   6  546.80    9.70
  -1   5  -6  566.24   13.73
  -1   5  -7   10.34    1.74
   1  -5   7    9.82    1.87
   1   5   7    8.95    1.83
  -1   5  -7   11.43    1.83
   1  -5   7    8.11    1.50
  -1   5  -7    9.47    1.56
   1   5   7    9.39    0.82
   1   5   8    0.21    0.46
  -1   5  -8    1.25    1.02
   1  -5   8    0.40    0.98
   1  -5   8    1.74    0.87
  -1   5  -8    2.33    0.98
   1   5   8    2.07    1.05
   1  -5   8    1.83    1.01
  -1   5  -8    1.54    0.99
  -1   5  -9   53.89    4.00
  -1   5  -9   49.84    3.61
   1  -5   9   47.98    3.62
   1   5   9   60.85    2.76
   1   5   9   58.87    4.50
   1  -5   9   55.97    3.89
  -1   5  -9   55.47    3.83
   1   5  10  272.84    7.08
  -1  -5 -10  259.78   10.88
  -1   5 -10  252.69    9.23
   1  -5  10  255.33    9.67
  -1   5 -10  268.84    9.08
  -1   5 -10  248.23    8.75
   1  -5  10  248.05    8.89
   1   5  11   69.73    3.57
  -1  -5 -11   70.51    5.74
  -1   5 -11   69.31    4.71
   1  -5  11   61.49    4.72
  -1   5 -11   70.53    4.83
  -1   5 -12    7.63    1.81
   1  -5  12    5.45    1.38
  -1  -5 -12    6.02    2.11
  -1   5 -12    4.89    1.83
   1   5  12    5.61    1.26
   1   5  13 1324.20   23.27
   1  -5  13 1293.41   27.97
   1   5  13 1361.13   24.49
  -1  -5 -13 1373.65   31.25
  -1   5 -13 1367.43   27.68
  -1   5 -13 1327.52   27.28
  -1   5 -14  118.69    6.86
  -1  -5 -14  133.14    8.69
   1   5  14  136.98    6.14
   1  -5  14  133.71    7.42
  -1   5 -14  129.63    7.36
   1   5  14  131.97    5.58
  -1   5 -15  118.65    7.18
  -1  -5 -15  119.75    8.59
   1   5  15  100.75    5.55
   1  -5  15  117.44    7.16
  -1   5 -15  110.13    6.87
   1   5  15   97.81    5.07
   1  -5  16   66.28    5.35
  -1   5 -16   68.90    5.79
  -1   5 -16   60.92    5.35
   1   5  16   61.15    4.52
  -1  -5 -16   59.20    6.32
   1  -5  17  182.00    9.14
  -1   5 -17  174.74    9.47
  -1   5 -17  179.07    9.47
   1   5  17  172.23    7.96
  -1  -5 -17  177.70   11.19
   1  -5  18   89.98    6.61
  -1   5 -18   80.88    6.69
  -1   5 -18   76.32    6.50
  -1  -5 -18   83.03    7.89
   1   5  18   78.33    5.52
   1  -5  19   26.67    3.77
  -1   5 -19   28.07    4.28
  -1   5 -19   23.96    3.99
  -1  -5 -19   31.91    5.27
   1  -5  20    1.36    1.45
  -1   5 -20    1.08    2.01
  -1   5 -20    1.46    1.89
  -1  -5 -20    5.56    3.29
  -1   5 -21    7.10    2.69
  -1  -5 -21    9.42    3.32
  -1   5 -21    7.56    3.01
   1   7 -20   18.83    3.75
  -1  -7  20   12.06    3.05
   1   7 -20   10.94    3.21
   1   7 -19    9.94    2.93
  -1  -7  19   11.96    2.87
   1   7 -19   12.48    3.04
   1   7 -18    1.23    1.75
  -1  -7  18    2.64    2.10
   1   7 -18    2.85    2.09
   1   7 -17    5.09    2.04
  -1  -7  17   10.62    2.99
   1   7 -17    6.61    2.26
   1   7 -16   13.09    2.83
  -1  -7  16   15.09    3.08
   1   7 -16    7.19    2.29
   1   7 -15    5.41    2.07
   1   7 -15    3.59    1.97
  -1  -7  15    8.31    2.55
  -1  -7  14  140.96    8.45
   1   7 -14  114.61    7.55
   1   7 -14  133.22    7.54
  -1   7  14  114.84    4.24
   1   7 -13   14.52    2.58
  -1   7  13   11.09    1.10
   1   7 -13   12.97    2.49
  -1   7  13    9.71    1.10
   1   7 -12    1.90    1.61
  -1  -7  12    1.12    1.24
  -1   7  12    0.61    0.36
   1   7 -12    0.90    1.09
  -1   7  12    0.93    0.37
   1   7 -11   90.81    5.68
  -1  -7  11   87.14    6.27
   1   7 -11   89.71    5.57
   1   7 -10   -0.39    1.28
   1   7 -10    2.34    1.46
  -1  -7  10    0.11    1.30
   1   7  -9    1.33    1.12
  -1  -7   9    0.11    1.15
  -1   7   9    1.62    0.52
   1   7  -9    1.85    1.30
   1   7  -8   27.21    2.99
   1   7  -8   28.02    2.91
  -1   7   8   24.66    1.86
  -1  -7   8   33.88    3.73
  -1  -7   7   13.70    2.36
   1   7  -7   12.64    2.09
  -1  -7   7   12.66    2.17
  -1   7   7   11.36    1.33
   1   7  -7   12.56    1.99
   1  -7  -6   62.54    3.67
  -1  -7   6   56.99    4.34
  -1   7   6   60.81    4.98
   1   7  -6   63.65    4.15
   1   7  -6   61.04    4.20
  -1  -7   6   66.98    5.02
  -1   7   6   63.13    3.23
   1  -7  -5   28.01    2.56
  -1  -7   5   24.89    2.88
  -1   7   5   28.75    3.41
   1   7  -5   28.13    2.78
   1   7  -5   31.91    2.98
  -1   7   5   29.52    2.37
  -1  -7   5   29.25    3.15
   1   7  -5   25.39    2.90
   1   7  -4   48.72    3.56
  -1   7   4   42.97    3.98
   1  -7  -4   41.44    3.18
  -1  -7   4   47.42    3.95
  -1   7   4   40.30    2.82
  -1  -7   4   52.63    4.10
   1   7  -4   43.82    3.59
   1   7  -3  440.13   11.74
   1   7  -3  429.75   12.11
  -1   7   3  440.62   10.89
  -1  -7   3  435.04   12.80
   1  -7  -3  447.08   11.68
  -1   7   3  456.18   13.27
   1   7  -2  242.68    8.38
  -1  -7   2  254.08    9.72
   1  -7  -2  250.82    8.50
   1   7  -2  238.49    8.42
  -1  -7   2  238.28    8.90
  -1   7   2  256.95    8.04
  -1  -7   2  250.02    7.06
   1  -7  -2  254.29    5.06
   1  -7  -2  251.34    5.38
  -1   7   1  132.74    6.23
   1   7  -1  127.41    5.97
   1   7  -1  127.15    5.81
  -1  -7   1  129.24    6.18
  -1   7   1  135.17    5.75
   1  -7  -1  128.55    6.08
  -1  -7   1  132.18    4.58
   1  -7  -1  137.17    3.88
   1  -7  -1  132.23    4.15
   1   7   0  174.74    7.21
  -1   7   0  159.58    6.67
  -1  -7   0  177.15    4.94
   1  -7   0  162.84    7.01
  -1  -7   0  179.42    7.17
   1   7   0  173.41    6.62
  -1   7   0  165.19    6.62
   1  -7   1  396.99   12.46
   1   7   1  417.50   12.19
  -1   7  -1  410.23   11.20
  -1  -7  -1  419.90    8.09
  -1  -7  -1  428.25   11.51
   1   7   1  405.92   10.73
   1  -7   1  410.00   12.04
  -1   7  -1  418.99   11.54
   1  -7   2  342.33   11.10
  -1   7  -2  338.39    9.64
   1   7   2  332.34   11.00
   1  -7   2  326.70   10.76
  -1   7  -2  319.75   10.12
   1   7   2  311.68    8.93
  -1  -7  -2  327.26    9.66
  -1  -7  -2  321.97    6.11
   1   7   3    7.29    1.83
   1  -7   3    6.71    1.70
  -1  -7  -3    8.47    1.62
  -1   7  -3    3.81    1.27
   1   7   3    6.06    1.12
  -1   7  -3    4.14    1.25
   1  -7   4    6.70    1.69
  -1  -7  -4    4.61    1.17
   1   7   4    2.56    1.53
  -1   7  -4    2.46    1.20
  -1   7  -4    4.33    1.21
   1   7   4    3.51    0.91
  -1   7  -4    5.75    1.43
   1  -7   5  448.77   12.79
  -1  -7  -5  473.71   11.25
   1   7   5  427.64   14.05
  -1   7  -5  438.85   11.65
  -1   7  -5  456.70   12.26
   1   7   5  449.28   10.13
  -1   7  -5  449.37   13.06
  -1   7  -6  115.71    5.51
  -1  -7  -6  117.47    4.87
   1  -7   6  118.69    6.14
  -1   7  -6  117.09    5.74
   1   7   6  108.01    4.21
  -1  -7  -7   16.88    1.79
   1  -7   7   16.41    2.78
   1   7   7   16.36    1.50
  -1   7  -7   18.38    2.48
   1  -7   7   13.34    2.21
  -1   7  -7   14.90    2.08
   1  -7   8    3.39    1.52
   1   7   8    0.63    0.51
  -1   7  -8    2.37    1.16
  -1   7  -8    2.41    1.42
   1  -7   9   81.06    5.91
  -1   7  -9   80.86    5.07
  -1   7  -9   78.37    4.97
  -1   7 -10   18.29    2.63
   1  -7  10   12.82    2.64
  -1   7 -10   13.98    2.40
  -1   7 -11   48.84    4.18
   1  -7  11   46.63    4.71
  -1   7 -11   51.77    4.47
  -1   7 -12   24.09    3.26
   1  -7  12   26.96    3.68
   1   7  12   19.62    1.31
  -1   7 -12   25.24    3.14
   1   7  12   16.77    1.26
  -1   7 -13   29.72    3.66
  -1   7 -13   32.94    3.76
   1  -7  13   35.81    4.27
   1   7  13   22.59    1.76
  -1   7 -14   72.23    5.87
   1  -7  14   77.94    6.39
   1   7  14   67.28    3.31
  -1   7 -14   81.71    5.95
   1  -7  15    6.72    2.27
  -1   7 -15    6.75    2.02
  -1   7 -15    7.73    2.41
   1  -7  16   12.07    2.97
  -1   7 -16   12.32    2.71
  -1   7 -16   16.20    3.14
   1  -7  17   17.78    3.64
  -1   7 -17   13.21    3.03
  -1   7 -17   10.43    2.76
   1  -7  18   11.85    2.89
  -1   7 -18    7.40    2.46
  -1   7 -18    9.78    2.71
   1  -7  19   10.72    2.79
  -1   7 -19   12.48    3.19
  -1   7 -19    5.88    2.26
  -1  -9  18   16.67    3.88
   1   9 -18   10.95    3.05
   1   9 -18    8.64    2.84
  -1  -9  17   17.82    3.79
   1   9 -17   15.79    3.23
   1   9 -17   14.83    3.32
   1   9 -16   88.48    7.12
   1   9 -16   86.33    7.13
  -1  -9  16  100.73    8.19
  -1  -9  15   26.71    4.52
   1   9 -15   21.87    3.67
   1   9 -15   18.05    3.45
  -1  -9  14    1.50    2.10
   1   9 -14    1.81    1.88
   1   9 -14    0.76    1.41
  -1  -9  13   24.15    4.15
   1   9 -13   16.49    3.06
   1   9 -13   16.77    2.97
   1   9 -12    7.15    2.21
   1   9 -12    9.12    2.24
  -1  -9  12   12.12    3.03
  -1  -9  11  155.61    9.34
   1   9 -11  154.96    8.08
   1   9 -11  161.12    8.44
   1   9 -10   -1.21    1.65
   1   9 -10    1.87    1.51
  -1   9   9    0.59    0.67
   1   9  -9    1.48    1.50
   1   9  -9    2.25    1.30
   1   9  -8  179.42    8.16
   1   9  -8  192.07    8.53
  -1  -9   8  183.77    9.72
  -1   9   8  168.54    6.08
  -1  -9   7   13.91    2.85
   1   9  -7   19.14    2.60
  -1   9   7   21.94    2.27
   1   9  -7   20.28    2.79
   1  -9  -6   -0.32    0.92
  -1   9   6   -2.19    1.86
  -1  -9   6    3.96    2.00
  -1   9   6    1.16    0.68
   1   9  -6   -1.61    1.42
   1   9  -6    1.21    1.22
  -1  -9   6   -0.03    0.86
  -1   9   5    2.00    1.83
   1  -9  -5    3.25    1.29
  -1  -9   5    2.66    1.81
  -1   9   5    2.09    1.08
   1   9  -5    3.39    1.52
   1   9  -5    3.73    1.57
  -1  -9   5    2.85    1.11
   1   9  -4   76.22    5.01
   1  -9  -4   73.10    4.96
  -1   9   4   89.53    6.25
  -1  -9   4   70.53    4.30
  -1   9   4   71.36    4.40
  -1  -9   4   77.75    5.91
   1   9  -3   73.18    4.97
  -1  -9   3   73.37    4.11
  -1  -9   3   82.30    5.86
  -1   9   3   68.88    4.45
  -1   9   3   74.07    5.46
   1  -9  -3   69.49    4.92
  -1   9   2   35.28    3.31
  -1  -9   2   30.47    3.55
   1  -9  -2   39.27    3.76
  -1   9   2   39.72    4.01
   1   9  -2   28.97    3.23
  -1  -9   2   38.78    2.83
   1  -9  -2   35.54    1.75
   1  -9  -2   36.64    1.92
   1  -9  -1   48.56    2.69
   1   9  -1   51.71    4.30
  -1   9   1   56.58    4.46
   1  -9  -1   46.30    4.18
  -1  -9   1   50.01    2.98
   1  -9  -1   47.36    2.42
  -1   9   1   45.72    3.86
   1  -9   0   55.88    3.24
  -1   9   0   62.32    4.66
   1   9   0   63.78    4.79
   1  -9   0   55.73    4.73
  -1  -9   0   61.93    4.80
  -1  -9   0   63.46    3.09
   1  -9   0   56.08    2.94
   1  -9   1   56.80    4.89
  -1   9  -1   62.43    4.53
   1   9   1   62.85    5.07
   1  -9   1   65.50    3.45
  -1  -9  -1   60.27    2.73
  -1  -9  -1   59.63    4.74
   1   9   1   58.26    4.23
   1   9   2  150.00    7.76
  -1   9  -2  147.97    6.94
  -1  -9  -2  139.84    3.84
   1   9   2  143.98    6.56
  -1  -9  -2  155.82    7.30
   1  -9   2  149.33    7.93
  -1  -9  -2  133.17    3.66
  -1   9  -3   15.67    2.33
   1   9   3   16.18    2.88
  -1  -9  -3   16.11    2.42
   1  -9   3   13.39    2.66
   1   9   3   14.84    2.05
  -1   9  -4   83.95    5.25
  -1  -9  -4   92.46    5.36
   1   9   4   92.90    6.58
  -1   9  -4   80.96    5.25
   1  -9   4  100.22    6.65
   1   9   4   80.96    4.57
  -1   9  -5    3.19    1.49
   1  -9   5    1.66    1.34
  -1  -9  -5    4.34    1.47
   1   9   5    3.10    1.94
  -1   9  -5    1.31    1.36
   1   9   5    0.45    0.77
  -1   9  -6   36.10    3.52
  -1  -9  -6   44.74    3.55
   1   9   6   40.85    4.81
  -1   9  -6   38.23    3.73
   1   9   6   35.44    2.76
   1  -9   6   39.12    4.55
  -1   9  -7    0.21    1.08
   1  -9   7    1.82    1.78
  -1  -9  -7    1.26    0.97
   1   9   7    0.93    0.81
  -1   9  -7    0.56    1.17
  -1   9  -8    7.10    1.82
   1  -9   8   11.31    3.00
   1   9   8   10.58    1.51
  -1   9  -8    9.56    2.19
  -1   9  -9   93.72    5.90
  -1   9  -9   90.20    6.18
   1  -9   9   91.37    7.02
  -1   9 -10   20.58    2.93
   1  -9  10   20.84    3.46
  -1   9 -10   18.79    2.96
  -1   9 -11   41.09    4.24
   1  -9  11   41.94    5.02
  -1   9 -11   41.78    4.29
  -1   9 -12    4.38    1.75
  -1   9 -12    2.65    1.52
   1  -9  12    2.81    1.90
   1  -9  13   29.59    4.25
  -1   9 -13   35.20    4.21
  -1   9 -13   25.21    3.57
   1  -9  14    6.65    2.37
  -1   9 -14   13.71    3.06
  -1   9 -14    9.64    2.44
   1  -9  15   15.75    3.46
  -1   9 -15   12.84    3.15
  -1   9 -15   10.14    2.53
   1  -9  16    1.77    2.32
  -1   9 -16    1.53    1.69
  -1   9 -16    3.46    2.20
   1  -9  17   57.27    6.29
  -1   9 -17   63.77    6.26
  -1   9 -17   69.47    6.55
  -1 -11  15   25.20    4.79
   1  11 -15   29.22    4.24
   1  11 -15   23.93    4.07
  -1 -11  14    9.94    3.20
   1  11 -14    9.14    2.66
   1  11 -14    3.77    2.15
   1  11 -13   21.38    3.68
  -1 -11  13   30.59    5.01
   1  11 -13   21.08    3.50
   1  11 -12   20.42    3.52
  -1 -11  12   18.44    3.78
   1  11 -12   20.05    3.44
   1  11 -11    3.23    1.86
  -1 -11  11    3.07    2.26
   1  11 -11   -1.40    1.69
   1  11 -10    5.83    2.10
  -1  11  10   10.33    3.08
  -1 -11  10    3.75    2.47
   1  11 -10   10.38    2.51
   1  11  -9    1.55    1.50
  -1 -11   9   -3.00    2.38
  -1  11   9    9.41    3.20
   1  11  -9    4.93    2.12
   1  11  -8   63.97    5.32
  -1 -11   8   69.30    6.67
  -1  11   8   76.86    7.02
   1  11  -8   68.27    5.66
   1  11  -7    2.76    1.66
  -1 -11   7    0.21    2.07
  -1  11   7    4.57    1.92
   1  11  -7   -0.36    1.27
   1  11  -6    0.87    1.46
   1  11  -6   -1.16    1.54
  -1 -11   6    2.63    2.13
  -1  11   6   -1.76    1.59
   1  11  -5   72.87    5.52
  -1 -11   5   91.28    7.19
   1  11  -5   80.08    5.92
  -1  11   5   83.60    6.70
   1 -11  -5   81.36    5.81
   1 -11  -4   40.39    4.24
  -1  11   4   40.67    4.56
  -1 -11   4   44.04    5.05
   1  11  -4   39.35    4.12
   1  11  -4   43.84    4.42
  -1 -11   4   38.56    3.39
  -1 -11   3    2.56    1.20
  -1 -11   3    0.52    1.37
  -1  11   3    1.10    1.65
   1 -11  -3    0.12    1.27
   1  11  -3    1.06    1.51
   1 -11  -2    4.91    1.91
  -1  11   2    7.19    2.22
  -1 -11   2    5.94    1.89
   1  11  -2    8.64    2.20
   1 -11  -2    3.99    0.66
  -1 -11   2    6.38    1.46
   1 -11  -2    4.01    0.72
   1  11  -1   36.03    4.01
  -1  11   1   41.45    4.20
   1 -11  -1   37.68    4.49
   1 -11  -1   35.93    2.44
   1 -11  -1   30.62    2.06
  -1 -11   1   33.04    2.64
  -1 -11   1   34.21    4.15
   1 -11   0    0.59    1.50
  -1 -11   0    1.36    1.61
  -1 -11   0    1.85    0.91
   1  11   0    4.61    2.08
  -1  11   0    0.83    1.58
   1 -11   0    2.29    0.97
  -1 -11   0    3.27    1.02
   1 -11   0    1.36    0.72
   1 -11   1  134.93    5.90
  -1 -11  -1  136.78    4.65
  -1 -11  -1  115.71    4.14
   1 -11   1  123.59    5.20
   1  11   1  148.94    8.32
   1 -11   1  131.44    8.19
  -1 -11  -1  150.35    8.33
  -1  11  -1  131.41    7.33
   1 -11   2    5.97    2.17
   1  11   2    7.38    2.35
  -1 -11  -2    9.29    2.55
   1 -11   2    4.90    1.42
  -1  11  -2   10.89    2.40
  -1 -11  -2    4.50    0.66
  -1 -11  -2    4.76    0.62
   1 -11   2    7.55    1.50
  -1 -11  -3    1.43    1.65
   1 -11   3    1.32    1.60
   1  11   3    0.97    1.90
   1 -11   3    0.08    1.12
  -1  11  -3   -0.46    1.25
  -1  11  -3    0.42    1.23
   1 -11   3   -1.65    1.08
  -1  11  -4   14.50    2.60
   1  11   4   14.40    3.18
   1 -11   4    9.61    2.86
  -1 -11  -4   12.28    2.56
  -1  11  -4   10.91    2.49
   1 -11   4   11.14    1.94
  -1  11  -5   18.09    2.99
  -1 -11  -5   23.56    3.29
   1 -11   5   23.73    3.91
   1  11   5   21.15    3.72
  -1  11  -5   17.37    2.74
  -1  11  -6   -0.16    1.24
  -1 -11  -6   -0.04    1.20
   1 -11   6    2.31    1.81
   1  11   6   -1.12    1.96
  -1  11  -6   -1.01    1.43
   1  11   7   10.39    3.02
  -1 -11  -7    5.13    1.69
   1 -11   7    9.78    2.99
  -1  11  -7    5.78    2.02
  -1  11  -7    7.12    2.10
  -1  11  -8   61.43    5.32
   1 -11   8   71.88    6.88
   1  11   8   74.52    7.21
  -1  11  -8   62.47    5.24
   1 -11   9   34.96    5.01
   1  11   9   38.33    5.43
  -1  11  -9   25.82    3.88
  -1  11  -9   22.63    3.26
   1 -11  10    5.02    2.68
   1  11  10    1.42    2.26
  -1  11 -10    4.10    2.00
  -1  11 -10    4.84    1.93
   1 -11  11   -1.84    2.28
  -1  11 -11    0.87    1.64
  -1  11 -11   -2.25    1.62
   1 -11  12    6.72    2.35
  -1  11 -12    1.93    1.74
  -1  11 -12    3.16    1.74
   1 -11  13    6.09    2.69
  -1  11 -13    4.43    2.14
  -1  11 -13    6.49    2.17
   1 -11  14    3.67    2.41
  -1  11 -14    2.09    2.03
  -1  11 -14    1.85    1.61
  -1  11 -15   12.83    3.08
  -1  11 -15   12.84    3.24
  -1  13  11   -1.43    2.38
  -1 -13  11   -2.27    2.56
   1  13 -11    1.18    1.83
   1  13 -11    1.44    1.58
  -1  13  10   10.65    3.57
  -1 -13  10   11.29    4.19
   1  13 -10    8.73    2.62
   1  13 -10    9.24    2.44
  -1  13   9    1.16    2.49
  -1 -13   9   -0.69    1.99
   1  13  -9    1.50    1.97
   1  13  -9   -2.63    2.09
  -1  13   8    9.64    3.15
  -1 -13   8    6.46    2.89
   1  13  -8    7.66    2.78
   1  13  -8    7.45    2.23
  -1 -13   7    1.52    1.86
  -1  13   7    3.07    2.35
   1  13  -7    3.04    2.51
   1  13  -7    2.26    1.68
   1  13  -6    5.01    2.18
   1  13  -6    5.80    2.24
  -1 -13   6    6.30    2.74
  -1  13   6    6.09    2.67
   1  13  -5    0.34    1.63
  -1 -13   5   -0.65    1.34
   1  13  -5   -0.54    1.45
  -1  13   5    1.94    2.18
  -1 -13   5    1.74    2.20
   1  13  -4  170.52    9.28
  -1 -13   4  153.29    7.97
   1  13  -4  164.69    9.44
  -1 -13   4  159.23   10.43
   1 -13  -4  170.89    9.75
  -1  13   4  171.80   10.09
   1  13  -3    5.18    1.78
  -1  13   3    5.92    2.65
  -1 -13   3    3.96    1.40
   1  13  -3    7.74    2.36
   1 -13  -3    4.06    1.94
  -1 -13   3    3.75    2.44
  -1 -13   2   26.53    4.32
   1 -13  -2   26.48    4.15
   1  13  -2   25.96    4.00
  -1  13   2   27.52    3.93
  -1 -13   1   13.87    3.16
   1 -13  -1   18.90    3.70
   1  13  -1   18.02    3.29
  -1  13   1   19.79    3.35
   1 -13   0   26.64    4.19
  -1 -13   0   20.56    3.81
  -1  13   0   27.55    3.84
   1  13   0   19.57    3.50
  -1 -13  -1    2.73    1.81
   1 -13   1    1.20    1.70
   1  13   1    3.27    2.38
  -1  13  -1    0.39    1.69
  -1 -13  -2    0.73    1.88
   1 -13   2    1.27    1.96
   1  13   2    2.11    1.87
  -1  13  -2    0.72    1.42
  -1 -13  -3    9.90    2.74
   1 -13   3    9.57    2.87
  -1  13  -3   11.01    3.12
   1 -13   3    9.05    1.93
   1  13   3   11.16    3.30
  -1  13  -3    7.70    2.50
  -1 -13  -4   29.07    4.04
   1  13   4   28.47    4.46
   1 -13   4   26.22    4.50
  -1  13  -4   30.96    3.93
  -1  13  -4   28.47    3.94
   1 -13   4   26.77    3.59
  -1  13  -5   93.25    6.69
   1 -13   5   78.55    6.09
  -1  13  -5   73.36    6.27
   1  13   5   99.51    7.97
  -1 -13  -5   86.92    6.77
   1 -13   5   81.52    7.57
  -1  13  -6    0.44    1.57
   1 -13   6    3.78    1.60
  -1  13  -6   10.10    2.66
  -1 -13  -6    3.92    1.88
   1 -13   6    3.86    1.89
   1  13   6    9.11    2.85
  -1  13  -7   -1.52    1.57
   1 -13   7   -0.75    1.50
   1 -13   7   -1.16    2.21
   1  13   7   -0.74    1.84
  -1  13  -7    2.97    1.92
  -1  13  -8    6.77    2.47
   1 -13   8    7.12    2.04
   1 -13   8    4.93    2.52
   1  13   8    7.56    3.20
  -1  13  -8    3.50    2.29
  -1  13  -9    8.83    2.68
   1 -13   9   16.26    3.42
   1 -13   9   14.04    3.93
   1  13   9    9.56    3.20
  -1  13  -9    9.95    2.49
  -1  13 -10   12.77    3.04
   1 -13  10   12.26    3.10
   1  13  10   13.39    3.60
   1 -13  10   16.10    4.25
  -1  13 -10   12.87    3.23
  -1  13 -11   -1.61    1.79
   1 -13  11   -0.75    2.54
   1  13  11   -0.06    2.39
  -1  13 -11    2.18    2.13
   2   0 -22   -2.89    2.32
   2   0 -21   -1.44    2.29
   2   0 -20    2.33    2.21
   2   0 -19    3.65    2.45
   2   0 -18   33.32    4.19
   2   0 -18   36.93    4.44
  -2   0  18   31.60    2.60
   2   0 -17   -0.93    1.67
   2   0 -17    0.67    1.35
  -2   0  17   -0.89    0.92
   2   0 -16    0.64    1.50
   2   0 -16   -0.69    1.32
  -2   0  16    1.33    0.78
   2   0 -15   -0.65    1.06
   2   0 -15    1.52    1.35
  -2   0  15   -0.42    0.62
   2   0 -14  146.25    7.37
  -2   0  14  130.84    4.99
   2   0 -13    0.69    1.01
  -2   0  13    0.73    0.61
   2   0 -13    0.38    1.15
  -2   0  13   -0.63    1.10
   2   0 -12    1.73    1.05
   2   0 -12    3.24    1.19
  -2   0  12    2.85    1.37
  -2   0  12    3.24    1.27
  -2   0  12    3.05    0.91
   2   0 -11   -0.74    0.97
  -2   0  11    0.37    0.58
   2   0 -11    2.21    1.24
  -2   0  11    1.51    1.00
  -2   0  11    0.62    0.76
  -2   0  10 1274.83   20.23
  -2   0  10 1319.22   23.22
   2   0 -10 1303.43   22.88
  -2   0  10 1314.49   22.19
   2   0  -9    0.43    0.80
  -2   0   9   -0.35    0.44
  -2   0   9    0.18    0.74
   2   0  -9    0.38    1.10
  -2   0   9    0.26    0.73
  -2   0   8   48.55    2.21
  -2   0   8   53.41    3.11
   2   0  -8   47.18    3.08
  -2   0   8   46.19    2.65
   2   0  -8   47.68    2.85
   2   0  -7    0.03    0.56
  -2   0   7   -0.35    0.43
  -2   0   7   -0.33    0.71
   2   0  -7    0.76    0.81
  -2   0   7   -0.06    0.57
  -2   0   6 3410.17   47.78
  -2   0   6 3351.52   45.81
  -2   0   6 3270.02   46.59
   2   0  -6 3268.21   46.82
   2   0  -6 3404.54   47.84
  -2   0   5    0.34    0.32
  -2   0   5   -0.05    0.52
   2   0  -5    0.22    0.53
  -2   0   5    0.15    0.41
   2   0  -5    0.98    0.53
  -2   0   4   12.94    1.11
   2   0  -4   11.24    1.08
  -2   0   4   11.35    0.93
   2   0  -4   12.10    0.94
  -2   0   4   12.60    0.86
  -2   0   3    0.34    0.31
   2   0  -3    0.20    0.28
  -2   0   3    0.84    0.37
   2   0  -3    0.14    0.43
  -2   0   3    0.50    0.37
   2   0  -2  179.77    3.45
   2   0  -2  161.84    3.46
   2   0   2  190.29    4.39
   2   0   2  190.13    3.94
  -2   0  -2  190.10    3.90
  -2   0  -2  187.43    4.08
  -2   0  -3    0.32    0.42
   2   0   3    0.82    0.52
  -2   0  -3    0.48    0.46
   2   0   3    0.09    0.50
  -2   0  -3    0.52    0.42
  -2   0  -4   23.37    1.24
   2   0   4   24.50    1.28
   2   0   4   21.73    1.52
  -2   0  -4   24.13    1.57
   2   0   4   25.62    1.60
  -2   0  -4   23.23    1.66
  -2   0  -5    0.17    0.33
  -2   0  -5    0.28    0.71
   2   0   5   -0.33    0.57
  -2   0  -5    0.36    0.64
   2   0   5   -0.17    0.51
   2   0   5    0.15    0.39
  -2   0  -6 8848.99  118.79
   2   0   6 8883.46  119.05
   2   0   6 9293.98  121.14
  -2   0  -6 9090.95  121.18
  -2   0  -6 8897.29  121.20
   2   0   6 8940.49  120.90
  -2   0  -7    0.14    0.41
  -2   0  -7    0.27    0.75
  -2   0  -7    0.98    0.82
   2   0   7    0.81    0.77
   2   0   7   -0.04    0.60
   2   0   7   -0.62    0.54
  -2   0  -8  190.10    4.81
   2   0   8  197.83    5.20
   2   0   8  199.84    6.53
  -2   0  -8  196.93    6.57
  -2   0  -8  183.36    6.40
   2   0   8  193.75    6.30
  -2   0  -9   -0.37    0.43
   2   0   9    0.46    0.51
  -2   0  -9   -0.07    0.90
   2   0   9    0.98    0.89
  -2   0  -9    0.44    1.07
   2   0   9   -0.89    1.09
  -2   0 -10  405.53    8.26
   2   0  10  387.34    8.68
   2   0  10  403.19   10.81
  -2   0 -10  386.47   11.04
  -2   0 -10  393.57   11.01
   2   0  10  393.36   10.37
   2   0  11    0.04    0.51
  -2   0 -11    0.10    0.50
  -2   0 -11   -0.42    1.10
   2   0  11   -0.54    0.76
  -2   0 -11    1.94    1.03
   2   0  11    0.15    0.79
   2   0  12    2.34    0.77
  -2   0 -12    2.43    0.71
  -2   0 -12   -0.66    1.18
   2   0  12    1.46    0.95
  -2   0 -12    2.97    1.34
  -2   0 -13    0.47    0.51
  -2   0 -13   -0.48    0.95
  -2   0 -14  928.01   16.52
  -2   0 -14  984.75   22.26
  -2   0 -15    0.68    1.27
  -2   0 -16   18.42    3.31
  -2   0 -17   -0.06    1.53
  -2   0 -18    1.38    1.58
  -2   0 -19   -0.51    1.82
   2   0  20    2.28    2.08
  -2   0 -20    3.07    2.63
   2   0  21   -0.42    1.64
  -2   0 -21    2.45    2.49
   2   0  22   66.38    7.04
  -2   0 -22   72.26    7.81
   2   2 -22    0.82    2.12
   2   2 -22    0.77    2.24
   2  -2 -22    0.58    2.75
   2   2 -21   -0.32    1.74
   2  -2 -21    4.03    2.78
   2   2 -21    0.72    1.88
   2   2 -20    4.12    1.82
   2  -2 -20    0.97    1.98
   2   2 -20    4.98    2.40
   2  -2 -19   71.97    7.09
   2   2 -19   78.61    6.47
   2   2 -19   70.51    6.19
  -2  -2  19   66.89    4.81
   2  -2 -18   45.45    5.18
   2   2 -18   40.99    4.61
   2   2 -18   46.26    4.96
  -2  -2  18   41.39    3.69
   2  -2 -17   35.48    4.43
   2   2 -17   26.95    3.71
   2   2 -17   29.26    3.88
  -2  -2  17   31.77    3.22
   2  -2 -16    1.51    1.86
   2   2 -16    0.89    1.40
   2   2 -16    2.32    1.51
  -2  -2  16    3.45    1.25
  -2   2  15   33.67    3.21
  -2  -2  15   31.42    2.96
   2  -2 -15   32.93    3.78
   2   2 -15   31.11    3.56
   2   2 -15   33.70    3.52
  -2   2  14    1.28    1.04
  -2  -2  14    0.86    0.94
  -2   2  14    0.49    0.33
   2   2 -14    1.48    0.99
   2  -2 -14   -0.35    1.29
   2   2 -14   -2.08    1.48
   2   2 -14    0.94    1.40
  -2   2  13    2.46    1.13
   2   2 -13    1.57    0.75
   2  -2 -13    1.44    1.40
  -2   2  13    2.26    0.45
  -2  -2  13    3.12    1.15
   2   2 -13    3.27    1.33
  -2  -2  13    3.10    1.23
   2   2 -13    3.56    1.30
  -2   2  13    0.82    0.99
   2  -2 -12   35.62    3.59
  -2  -2  12   36.43    2.94
   2   2 -12   38.05    2.80
  -2   2  12   33.69    1.48
  -2  -2  12   36.21    2.90
   2   2 -12   31.24    3.41
  -2   2  12   38.57    3.17
   2   2 -12   38.97    3.32
   2  -2 -11   56.92    4.37
  -2  -2  11   70.05    3.92
   2   2 -11   70.30    3.66
  -2   2  11   67.73    2.06
  -2  -2  11   66.15    4.29
  -2  -2  11   65.68    3.80
   2   2 -11   70.03    4.42
  -2   2  11   74.53    4.48
   2   2 -11   69.83    4.04
  -2   2  11   69.25    4.03
   2  -2 -10    7.32    1.73
  -2  -2  10    8.37    1.37
   2   2 -10    7.46    1.23
  -2   2  10    9.33    0.67
  -2  -2  10    8.36    1.60
   2   2 -10    7.64    1.62
  -2   2  10    9.32    1.61
  -2   2  10    9.04    1.44
  -2  -2  10    8.93    1.43
   2   2 -10    8.34    1.46
   2  -2  -9    0.59    1.00
  -2   2   9    1.27    0.87
  -2   2   9    0.85    0.32
  -2  -2   9    2.42    1.08
   2   2  -9    0.69    0.66
  -2  -2   9    0.59    0.76
   2   2  -9    0.78    0.95
  -2   2   9    1.50    0.95
   2   2  -9    1.41    0.91
  -2  -2   9    1.19    0.81
   2  -2  -8    0.22    0.94
  -2   2   8    0.83    0.85
  -2   2   8    0.27    0.28
  -2  -2   8    0.06    0.64
   2   2  -8    0.34    0.76
  -2  -2   8    0.00    0.76
  -2   2   8   -0.27    0.75
   2   2  -8   -0.20    0.83
   2   2  -8    0.83    0.80
  -2  -2   8    0.56    0.71
  -2   2   7  192.66    5.02
   2  -2  -7  189.58    6.51
   2   2  -7  185.84    5.66
  -2  -2   7  180.10    5.70
  -2  -2   7  190.76    6.04
   2   2  -7  184.51    5.95
  -2  -2   7  190.28    5.56
  -2   2   7  196.94    6.19
   2   2  -7  194.57    5.77
  -2   2   7  191.15    5.90
  -2   2   6   47.04    2.07
  -2   2   6   49.06    2.74
   2  -2  -6   43.94    2.92
   2   2  -6   44.98    2.50
  -2  -2   6   48.07    2.64
   2   2  -6   49.31    2.72
  -2  -2   6   43.28    2.57
  -2   2   6   47.14    2.67
  -2  -2   6   47.92    2.43
   2   2  -6   40.74    2.27
  -2   2   5  728.97   11.44
   2  -2  -5  723.17   13.84
  -2   2   5  726.15   13.32
   2   2  -5  714.72   12.99
  -2  -2   5  714.12   13.15
  -2  -2   5  724.58   13.02
   2   2  -5  664.82   12.79
  -2  -2   5  717.81   12.57
  -2   2   5  731.69   13.11
   2   2  -5  705.51   12.35
  -2   2   4    4.10    0.49
  -2  -2   4    4.94    0.92
   2   2  -4    5.23    0.87
   2  -2  -4    3.33    0.89
  -2   2   4    2.32    0.65
  -2  -2   4    5.16    0.84
   2   2  -4    4.17    0.82
  -2  -2   4    5.13    0.75
   2   2  -4    5.34    0.81
   2   2  -3  437.30    8.53
  -2  -2   3  431.84    8.64
  -2   2   3  428.69    7.56
  -2   2   3  429.38    8.79
  -2  -2   3  415.68    8.36
   2   2  -3  455.11    8.47
   2   2  -3  429.01    7.95
  -2   2   3  434.54    6.89
   2  -2  -3  437.06    6.73
  -2   2   2  301.34    5.84
   2   2  -2  316.80    6.29
  -2  -2   2  310.08    5.99
  -2  -2   2  309.80    6.42
   2   2  -2  307.92    6.27
   2   2  -1 2401.28   33.79
  -2  -2   1 2347.37   33.86
  -2   2   1 2422.00   32.64
  -2   2   1 2451.71   33.90
   2   2  -1 2477.58   34.23
   2  -2  -1 2349.74   33.98
  -2  -2   1 2384.14   34.43
  -2  -2   1 2362.78   33.12
   2   2  -1 2388.76   33.05
   2  -2  -1 2435.92   32.65
  -2   2   0  105.44    2.88
   2  -2   0  124.69    3.69
  -2  -2   0  104.92    3.70
   2   2   0  103.35    3.50
   2  -2   0  114.94    3.12
   2  -2   0  106.15    2.89
   2   2   0  106.35    2.95
  -2  -2   0  110.62    3.03
  -2   2   0  108.97    3.39
   2   2   0  103.76    2.49
  -2  -2   0  108.22    2.61
   2   2   1  105.05    2.39
  -2  -2  -1  100.55    2.71
  -2   2  -1  104.98    3.46
   2   2   1  103.98    2.67
   2  -2   1  102.74    3.52
   2  -2   1  107.01    2.86
  -2   2  -1  107.86    2.75
  -2   2  -1  109.67    3.09
  -2  -2  -1  102.17    2.43
  -2  -2  -2  374.99    6.25
  -2   2  -2  371.66    7.88
   2  -2   2  368.54    7.96
   2  -2   2  361.91    6.84
  -2   2  -2  362.97    6.73
  -2  -2  -2  378.89    6.30
  -2   2  -2  388.56    7.30
   2  -2   2  360.75    7.25
   2   2   2  353.44    8.12
  -2  -2  -2  370.21    8.25
  -2  -2  -3   13.64    1.49
   2   2   3   19.33    1.70
  -2   2  -3   18.81    1.60
  -2  -2  -3   21.46    0.89
   2  -2   3   20.11    1.68
   2  -2   3   20.31    1.37
  -2   2  -3   18.92    1.28
   2  -2   3   18.69    1.45
  -2   2  -3   17.52    1.40
   2   2   3   19.75    1.17
   2  -2   4   80.15    3.47
  -2   2  -4   77.64    3.33
   2  -2   4   81.19    3.02
  -2   2  -4   80.66    2.96
   2   2   4   85.38    2.80
   2   2   4   80.09    3.61
  -2  -2  -4   75.65    3.76
   2  -2   4   80.05    3.11
  -2   2  -4   69.76    2.91
   2  -2   5   71.90    3.36
  -2   2  -5   68.65    3.20
  -2   2  -5   65.84    2.88
   2  -2   5   61.61    2.84
   2   2   5   69.71    2.84
  -2  -2  -5   68.11    3.70
   2   2   5   74.40    3.55
   2  -2   5   69.13    3.07
  -2   2  -5   65.50    3.10
   2  -2   6   54.07    2.99
  -2   2  -6   53.42    2.94
   2  -2   6   54.99    2.89
  -2   2  -6   54.39    3.05
  -2  -2  -6   58.36    3.67
   2   2   6   60.90    2.93
   2   2   6   59.79    3.25
  -2   2  -6   55.29    3.03
   2  -2   6   59.08    2.99
  -2   2  -7   18.70    1.85
   2  -2   7   21.07    2.06
  -2  -2  -7   18.66    2.35
   2  -2   7   17.99    1.92
   2   2   7   17.88    1.98
  -2   2  -7   16.98    1.86
   2  -2   7   18.92    1.85
  -2   2  -7   17.27    1.94
   2   2   7   20.93    2.07
  -2   2  -8   14.10    1.64
   2  -2   8   10.08    1.50
   2  -2   8   10.42    1.65
  -2  -2  -8   10.26    1.86
   2   2   8   11.87    1.78
  -2   2  -8   10.66    1.61
   2   2   8   12.77    1.80
  -2   2  -8   13.58    1.73
   2  -2   8   10.35    1.51
   2  -2   9  197.19    6.76
  -2   2  -9  201.64    6.45
  -2  -2  -9  198.59    8.00
   2  -2   9  204.20    6.79
  -2   2  -9  199.65    7.17
   2   2   9  205.98    7.34
  -2   2  -9  200.77    7.03
   2   2   9  206.23    7.30
   2  -2   9  196.34    6.80
  -2   2 -10   15.47    1.77
   2  -2  10   16.32    2.04
  -2  -2 -10   16.75    2.56
   2  -2  10   13.76    1.86
   2   2  10   18.17    2.33
  -2   2 -10   14.99    2.06
  -2   2 -10   17.18    2.21
   2   2  10   14.57    1.95
   2  -2  10   14.97    1.95
  -2   2 -11  548.96   12.44
   2  -2  11  567.47   13.19
  -2  -2 -11  542.56   15.04
   2  -2  11  547.94   13.47
  -2   2 -11  552.09   13.95
   2   2  11  498.59   13.69
   2   2  11  554.64   13.78
  -2   2 -11  565.45   14.05
   2  -2  11  556.09   13.33
   2  -2  12    1.34    0.76
  -2   2 -12    1.54    0.82
  -2  -2 -12    3.34    1.59
  -2   2 -12    1.34    1.06
  -2   2 -12    1.71    1.18
   2  -2  13   35.69    3.12
  -2   2 -13   34.85    2.85
  -2  -2 -13   37.34    4.22
  -2   2 -13   39.09    3.69
  -2   2 -13   36.87    3.68
   2  -2  14   10.36    1.81
  -2   2 -14   15.56    2.00
  -2  -2 -14   12.29    2.75
  -2   2 -14   15.59    2.47
  -2   2 -15   -1.24    1.29
  -2  -2 -15    2.40    1.91
  -2   2 -15    0.25    0.91
  -2   2 -15   -1.29    1.41
   2  -2  15    1.44    1.20
  -2   2 -16    0.73    1.68
   2   2  16    1.32    1.27
  -2  -2 -16    0.81    1.36
  -2   2 -16   -0.51    0.88
  -2   2 -16    0.76    1.67
   2  -2  16   -0.24    1.08
   2   2  17   33.60    3.89
  -2  -2 -17   35.43    4.79
  -2   2 -17   33.09    4.24
  -2   2 -17   29.11    2.79
   2  -2  17   30.97    3.15
  -2   2 -17   34.02    4.17
  -2   2 -18    2.11    1.76
   2   2  18    0.86    1.47
  -2  -2 -18    0.40    2.00
  -2   2 -18    1.12    1.53
  -2   2 -19  272.41   12.43
  -2   2 -19  270.21   12.70
   2   2  19  283.65   12.35
  -2  -2 -19  269.40   14.20
  -2  -2 -20    5.69    2.69
  -2   2 -20    1.65    1.79
   2   2  20    4.05    2.23
  -2   2 -20    2.92    1.65
   2   2  21    1.19    1.85
  -2   2 -21    3.37    1.95
  -2  -2 -21   -0.58    1.97
   2   2  22    5.87    2.66
  -2  -2 -22    0.56    2.41
   2  -2  22    2.68    2.28
  -2   2 -22   -0.42    2.30
   2  -4 -22   39.90    6.10
   2   4 -22   39.81    5.43
   2   4 -22   32.93    5.07
  -2   4  21    4.38    2.30
   2  -4 -21    7.63    3.44
   2   4 -21    2.98    2.16
   2   4 -21   -0.54    1.88
  -2   4  20    9.11    2.47
   2   4 -20    8.56    2.57
   2  -4 -20    9.75    3.38
   2   4 -20    7.68    2.88
  -2  -4  20    8.54    2.19
   2  -4 -19   28.87    4.83
   2   4 -19   24.34    3.74
   2   4 -19   22.62    3.87
  -2  -4  19   28.66    3.54
   2  -4 -18    1.04    2.02
   2   4 -18    1.62    1.30
   2   4 -18    1.90    1.53
  -2  -4  18    3.74    1.67
   2  -4 -17  171.32   10.29
  -2  -4  17  162.44    8.16
   2   4 -17  166.42    9.04
   2   4 -17  158.00    8.53
   2  -4 -16    1.80    1.61
   2   4 -16    3.08    1.62
   2   4 -16    1.10    1.38
  -2   4  16    2.30    1.15
  -2   4  15   44.30    3.44
   2  -4 -15   58.66    5.58
  -2  -4  15   50.77    4.33
   2   4 -15   41.92    4.35
   2   4 -15   46.86    4.18
  -2   4  14   61.62    3.85
  -2  -4  14   59.84    4.50
   2  -4 -14   66.76    6.00
   2   4 -14   60.60    4.91
   2   4 -14   56.57    4.42
  -2   4  13    4.98    1.08
  -2  -4  13    3.56    1.39
   2   4 -13    4.32    1.35
   2  -4 -13    5.50    1.99
   2   4 -13    7.88    1.87
   2   4 -13    5.44    1.59
  -2   4  12    7.83    1.37
   2   4 -12    9.60    1.72
  -2  -4  12   10.13    2.01
   2   4 -12    5.06    1.51
   2   4 -12    6.51    1.78
  -2   4  12    6.23    1.55
   2  -4 -12    6.59    2.07
  -2   4  11  226.82    6.52
   2  -4 -11  235.25    9.77
  -2  -4  11  227.86    8.57
   2   4 -11  226.01    8.08
   2   4 -11  232.60    8.46
  -2  -4  11  218.00    7.79
  -2   4  11  223.21    8.36
   2   4 -11  230.84    8.12
  -2   4  10  147.94    4.83
   2  -4 -10  156.55    7.48
  -2  -4  10  157.81    6.79
   2   4 -10  155.36    6.46
   2   4 -10  154.91    6.62
  -2  -4  10  159.98    6.65
  -2  -4  10  151.82    6.25
  -2   4  10  161.24    6.85
   2   4 -10  153.33    6.24
  -2   4  10  152.11    6.59
  -2   4   9  223.47    5.78
  -2   4   9  232.25    8.48
   2  -4  -9  229.64    8.84
   2   4  -9  231.12    7.85
  -2  -4   9  237.12    8.28
   2   4  -9  229.20    8.08
  -2  -4   9  230.28    7.97
  -2  -4   9  244.11    7.73
  -2   4   9  249.99    8.39
   2   4  -9  226.16    7.37
  -2   4   8   26.31    1.56
  -2   4   8   21.84    2.51
   2  -4  -8   23.89    2.76
  -2  -4   8   24.68    2.63
   2   4  -8   26.69    2.46
  -2   4   8   26.82    1.18
  -2  -4   8   26.71    2.46
   2   4  -8   25.74    2.40
  -2  -4   8   28.42    2.44
  -2   4   8   25.55    2.50
   2   4  -8   26.40    2.45
  -2  -4   7  257.90    8.38
  -2   4   7  274.71    5.48
   2   4  -7  279.09    8.36
   2   4  -7  271.18    7.96
  -2  -4   7  282.50    8.24
  -2   4   7  264.18    8.61
   2   4  -7  264.49    7.56
  -2   4   7  268.44    5.46
  -2   4   6  470.79    8.55
  -2  -4   6  467.88   11.60
   2   4  -6  475.94   11.00
  -2  -4   6  458.70   10.96
  -2   4   6  446.60   11.82
   2   4  -6  456.92   10.39
  -2   4   6  459.77    7.65
  -2   4   5  670.16   14.67
   2   4  -5  628.55   13.03
  -2  -4   5  629.08   13.50
   2   4  -5  632.88   12.89
   2   4  -5  641.23   13.64
  -2  -4   5  647.00   14.02
  -2   4   5  662.11   11.39
  -2  -4   4   91.05    4.24
  -2   4   4   95.83    4.60
   2   4  -4   90.29    3.97
   2   4  -4   86.69    3.76
  -2   4   4   90.05    3.29
  -2  -4   4   94.51    4.36
   2   4  -4   87.62    4.06
   2   4  -3  197.87    6.01
   2   4  -3  190.54    6.07
  -2  -4   3  185.10    6.17
  -2   4   3  189.73    5.31
  -2  -4   3  189.32    6.24
   2  -4  -3  195.40    5.62
   2   4  -2  653.06   12.97
  -2   4   2  670.31   12.50
  -2  -4   2  626.00   13.10
   2  -4  -2  672.66   12.83
   2   4  -2  648.85   12.97
  -2  -4   2  668.29   13.73
  -2  -4   2  657.39   11.86
   2  -4  -2  657.44   10.07
  -2  -4   1   60.34    3.48
   2   4  -1   62.18    3.28
  -2   4   1   58.72    3.09
   2  -4  -1   56.41    3.01
   2   4  -1   58.31    2.93
  -2  -4   1   56.55    3.00
  -2   4   1   61.07    3.01
  -2  -4   1   60.88    2.43
   2  -4  -1   54.89    2.12
  -2   4   0   88.89    3.67
   2  -4   0   96.36    4.14
   2   4   0   92.60    4.23
   2  -4   0   82.92    3.86
   2   4   0   91.03    3.52
  -2  -4   0   83.41    3.54
  -2   4   0   93.83    3.94
  -2  -4   0   88.96    2.73
   2  -4   0   92.76    3.20
  -2   4  -1  113.94    4.52
  -2  -4  -1  107.18    3.88
   2  -4   1  112.96    4.70
   2   4   1  111.20    3.80
  -2  -4  -1  113.93    2.90
   2   4   1  116.06    4.98
  -2   4  -1  112.02    3.97
   2  -4   1  112.23    4.38
   2   4   2 2754.29   36.65
   2  -4   2 2736.32   41.82
  -2  -4  -2 2730.36   39.37
   2   4   2 2725.00   39.00
  -2   4  -2 2722.16   41.37
   2  -4   2 2723.53   40.36
  -2   4  -2 2672.79   39.57
  -2   4  -2 2705.93   40.23
  -2  -4  -2 2824.64   37.06
   2  -4   3  261.65    6.90
   2   4   3  252.58    8.16
  -2   4  -3  264.56    6.60
  -2   4  -3  245.99    6.84
  -2  -4  -3  270.34    6.12
   2  -4   3  262.60    7.95
   2   4   3  260.02    5.79
   2   4   4    7.18    0.80
  -2   4  -4    8.65    1.48
  -2  -4  -4    8.89    1.00
   2  -4   4    6.62    1.39
  -2   4  -4    7.09    1.23
   2  -4   4    9.14    1.42
  -2   4  -4    7.15    1.28
   2   4   4    9.04    0.68
   2   4   4    7.03    1.47
   2   4   5 1035.69   20.91
  -2   4  -5 1051.66   19.89
   2  -4   5 1071.30   20.49
  -2  -4  -5 1065.08   16.18
   2  -4   5 1002.04   18.53
  -2   4  -5 1035.10   18.28
  -2   4  -5 1057.62   18.91
   2  -4   5 1038.24   19.03
   2   4   5 1059.05   15.73
   2   4   6 4076.47   55.28
  -2  -4  -6 4073.76   54.37
  -2   4  -6 4125.08   59.97
   2  -4   6 4055.94   60.58
  -2   4  -6 4042.35   58.01
   2  -4   6 3910.34   58.17
  -2  -4  -6 4036.37   61.55
   2   4   6 4096.59   61.09
   2  -4   6 4114.46   58.90
  -2   4  -6 4052.28   58.61
  -2   4  -7  210.44    7.43
   2  -4   7  215.08    7.88
   2   4   7  232.32    8.24
   2   4   7  230.61    5.69
  -2  -4  -7  223.01    8.63
   2  -4   7  211.88    7.01
  -2   4  -7  210.66    6.81
   2  -4   7  225.46    7.26
  -2   4  -7  218.50    7.16
   2   4   8   10.12    1.26
  -2   4  -8    8.47    1.42
   2  -4   8   10.70    1.82
   2  -4   8   10.87    1.74
   2   4   8    7.94    1.68
  -2  -4  -8   10.72    2.41
   2  -4   8    9.27    1.47
  -2   4  -8    9.25    1.54
  -2   4  -8   10.75    1.73
  -2   4  -9   80.23    4.58
   2  -4   9   76.50    4.76
  -2   4  -9   77.83    4.52
   2  -4   9   70.39    4.27
  -2  -4  -9   84.62    5.75
   2   4   9   79.86    3.64
   2  -4   9   82.92    4.56
   2   4   9   82.27    4.90
   2   4   9   76.06    4.85
  -2   4  -9   82.33    4.66
  -2   4 -10  332.98   10.21
   2  -4  10  334.19   10.73
   2  -4  10  333.55    9.97
  -2   4 -10  352.63   10.26
   2  -4  10  336.09   10.12
   2   4  10  340.16   10.92
  -2   4 -10  333.96   10.23
   2   4  10  340.45   10.90
  -2  -4 -10  322.89   12.02
   2   4  10  344.99    8.95
   2  -4  11   47.18    3.92
  -2   4 -11   47.62    3.72
  -2  -4 -11   49.91    4.66
   2   4  11   46.02    3.22
  -2   4 -11   45.83    3.77
  -2   4 -11   48.24    3.83
   2   4  12    5.37    1.33
   2  -4  12    4.21    1.60
  -2   4 -12    5.23    1.44
  -2  -4 -12    5.38    2.24
  -2   4 -12    5.28    1.54
  -2   4 -12    4.11    1.45
   2  -4  13  141.07    7.12
  -2   4 -13  127.01    6.41
   2   4  13  147.84    6.42
  -2  -4 -13  161.51    9.08
  -2   4 -13  154.32    7.48
  -2   4 -13  135.37    7.10
   2  -4  14    5.20    1.80
  -2   4 -14    0.87    1.42
  -2  -4 -14    1.19    1.50
  -2   4 -14    4.00    1.82
   2   4  14    3.11    1.24
   2  -4  15    3.02    1.56
  -2   4 -15    2.93    1.57
  -2  -4 -15    5.58    2.42
  -2   4 -15    4.02    1.37
   2   4  15    5.57    1.67
   2  -4  16    2.76    1.26
  -2   4 -16    0.96    1.30
  -2  -4 -16    0.19    2.01
  -2   4 -16   -1.12    1.47
   2   4  16    1.47    1.36
   2  -4  17    1.94    1.26
  -2   4 -17    0.13    1.54
  -2  -4 -17    2.48    2.17
  -2   4 -17    0.92    1.93
   2   4  17    0.13    1.14
   2   4  18   33.07    3.97
  -2  -4 -18   33.22    5.12
  -2   4 -18   32.74    4.42
  -2   4 -18   32.43    4.24
   2  -4  18   27.91    3.69
   2   4  19   73.56    5.88
  -2  -4 -19   83.52    8.14
  -2   4 -19   79.27    6.84
  -2   4 -19   74.60    6.59
   2  -4  19   74.68    5.95
  -2   4 -20    6.48    2.61
  -2  -4 -20    4.44    2.70
   2   4  20    5.27    2.14
   2  -4  20    3.43    1.65
  -2   4 -20    3.88    2.41
  -2   4 -21    1.64    1.92
  -2   4 -21    1.50    1.98
  -2  -4 -21   -2.30    2.92
   2   6 -21   -0.02    1.87
   2   6 -21    0.95    1.97
  -2  -6  21   -0.39    1.69
   2   6 -20   14.00    3.52
   2   6 -20   10.04    2.89
  -2  -6  20    7.82    2.70
   2   6 -19    1.36    1.49
   2   6 -19   -0.75    1.51
  -2  -6  19   -0.71    1.80
   2   6 -18   19.11    3.49
   2   6 -18   22.87    3.70
  -2  -6  18   14.27    3.09
   2   6 -17   17.20    3.23
   2   6 -17   14.08    2.97
  -2   6  17   10.99    1.95
  -2  -6  17   15.14    2.95
   2   6 -16    2.32    1.61
  -2   6  16    5.35    1.33
  -2  -6  16    5.28    1.87
   2   6 -15    1.96    1.81
   2   6 -15   -0.59    1.66
  -2   6  15    2.72    1.18
  -2  -6  15   -0.70    1.38
  -2   6  14   10.89    1.65
  -2  -6  14    9.16    2.47
   2   6 -14   10.75    2.36
   2   6 -14    9.36    2.20
  -2   6  14   12.13    1.69
   2   6 -13    6.03    1.83
  -2   6  13    4.90    1.13
  -2  -6  13    6.53    1.89
   2   6 -13    6.65    1.94
  -2   6  13    5.33    1.12
   2   6 -12    3.91    1.45
  -2  -6  12    5.73    1.82
  -2   6  12    5.09    0.99
   2   6 -12    6.43    2.16
  -2   6  12    3.84    0.84
   2   6 -11    2.86    1.20
  -2  -6  11    1.21    1.09
   2   6 -11    2.43    1.43
  -2   6  11    3.63    0.77
  -2   6  11    3.53    0.71
  -2   6  10  178.07    4.36
  -2   6  10  172.59    4.14
   2   6 -10  169.12    7.50
  -2  -6  10  183.83    8.40
  -2   6  10  176.97    3.84
   2   6 -10  175.69    7.23
  -2   6   9  129.36    7.12
  -2  -6   9  146.59    7.25
  -2   6   9  141.76    3.70
   2   6  -9  152.87    6.63
   2   6  -9  146.72    6.31
  -2   6   8   10.62    2.14
  -2  -6   8    6.10    1.60
   2   6  -8    7.00    1.64
  -2  -6   8    7.23    1.74
  -2   6   8    6.40    0.94
   2   6  -8    5.63    1.48
   2   6  -8    7.67    1.59
  -2  -6   7  173.19    7.27
  -2   6   7  174.97    8.08
   2   6  -7  189.84    7.17
   2   6  -7  186.02    6.94
  -2   6   7  168.01    5.12
   2   6  -7  189.70    7.61
  -2  -6   7  197.77    8.20
  -2  -6   6  117.46    5.80
  -2   6   6  108.72    6.24
   2   6  -6  121.10    5.60
   2   6  -6  122.36    5.43
  -2   6   6  112.96    4.19
   2   6  -6  118.55    5.82
  -2  -6   6  124.80    6.35
   2  -6  -5   77.68    3.88
  -2  -6   5   76.79    4.69
  -2   6   5   80.45    5.13
   2   6  -5   74.68    4.28
   2   6  -5   74.44    4.15
   2   6  -5   78.71    4.63
  -2  -6   5   77.72    4.92
  -2   6   5   78.23    3.57
   2   6  -4    8.22    1.41
   2   6  -4    7.60    1.48
  -2  -6   4    9.80    1.83
  -2   6   4   10.92    1.53
   2  -6  -4    8.73    1.61
  -2  -6   4   10.30    2.01
  -2  -6   3 1319.84   22.02
  -2   6   3 1269.72   22.28
  -2  -6   3 1273.48   24.36
   2   6  -3 1268.58   23.63
   2   6  -3 1321.42   23.54
   2  -6  -3 1253.61   23.04
  -2   6   3 1214.72   24.48
  -2  -6   3 1286.46   24.90
  -2   6   2  308.92    8.65
  -2  -6   2  314.98    9.56
   2   6  -2  325.03    9.25
  -2  -6   2  338.64   10.63
   2   6  -2  309.28    9.32
  -2   6   2  329.22    9.84
   2  -6  -2  302.83    9.03
  -2  -6   2  330.17    7.91
   2  -6  -2  301.60    6.16
  -2   6   1  135.09    5.73
  -2  -6   1  137.41    6.60
   2   6  -1  132.84    5.77
   2  -6  -1  135.91    5.86
  -2   6   1  134.26    5.49
   2   6  -1  137.23    5.54
  -2  -6   1  134.70    5.83
  -2  -6   1  133.44    4.32
   2  -6  -1  133.01    4.07
   2  -6   0  143.37    6.18
  -2   6   0  137.62    5.63
   2   6   0  143.03    6.20
  -2  -6   0  142.23    5.83
  -2   6   0  148.14    5.92
   2   6   0  148.10    5.60
  -2  -6   0  142.85    4.19
   2  -6   0  145.74    4.77
  -2   6  -1  119.95    5.07
   2  -6   1  130.60    6.00
   2   6   1  128.15    6.09
   2   6   1  126.44    4.97
  -2   6  -1  117.30    5.42
  -2  -6  -1  118.29    5.14
   2  -6   1  123.42    5.87
  -2  -6  -1  125.11    3.53
  -2   6  -2    5.26    1.24
   2  -6   2    6.31    1.54
   2   6   2    4.13    1.43
  -2   6  -2    5.81    1.29
   2   6   2    3.16    0.82
  -2  -6  -2    5.07    1.17
  -2  -6  -2    5.43    0.65
   2   6   3  396.84   12.17
   2  -6   3  391.82   10.79
  -2   6  -3  388.35    9.83
  -2   6  -3  390.02   10.35
  -2  -6  -3  401.12    9.74
   2  -6   3  394.33   11.63
   2   6   3  375.64    8.99
  -2   6  -3  385.76   11.00
   2  -6   4   93.27    4.77
   2   6   4   93.24    5.66
  -2   6  -4   90.62    4.36
  -2   6  -4   94.64    4.67
  -2   6  -4   92.64    5.08
   2   6   4   87.99    3.66
  -2  -6  -4   92.28    4.04
   2  -6   5  320.39    9.50
   2   6   5  325.83   11.30
  -2   6  -5  316.22    8.99
  -2   6  -5  297.64    9.10
   2  -6   5  323.71   10.69
   2   6   5  313.95    7.33
  -2  -6  -5  310.83    7.93
  -2   6  -5  334.15   10.41
   2  -6   6  366.58   10.40
   2   6   6  343.83   11.91
  -2   6  -6  351.97    9.80
  -2   6  -6  367.08   10.33
  -2  -6  -6  342.84    8.17
   2   6   6  340.15    7.51
   2  -6   6  378.30   11.86
  -2   6  -6  358.79   11.04
  -2  -6  -7   67.13    2.96
   2  -6   7   67.84    4.35
   2   6   7   72.66    5.28
  -2   6  -7   70.00    4.11
  -2   6  -7   71.35    4.32
  -2   6  -7   70.43    4.73
   2  -6   7   80.08    5.33
  -2   6  -8    7.78    1.88
   2  -6   8    4.96    1.51
   2  -6   8    5.19    1.33
  -2   6  -8    8.87    1.65
   2   6   8    7.55    0.60
   2   6   8    8.77    0.74
  -2   6  -8    6.31    1.68
   2  -6   9  127.14    7.03
   2  -6   9  112.52    6.05
  -2   6  -9  122.43    5.85
   2   6   9  128.42    3.27
  -2   6  -9  117.03    5.95
   2  -6  10  711.56   18.78
  -2   6 -10  682.75   17.15
  -2   6 -10  720.41   16.79
   2   6  10  729.35   12.27
   2   6  10  707.84   12.73
   2  -6  11   35.29    3.93
  -2   6 -11   41.25    3.91
  -2   6 -11   37.36    3.59
   2   6  11   41.92    2.30
   2   6  11   36.86    2.37
  -2   6 -12    3.69    1.64
   2  -6  12    2.52    1.47
   2   6  12    0.76    0.71
  -2   6 -12   -1.40    1.15
   2   6  12    1.73    1.06
  -2   6 -13    2.94    1.49
   2  -6  13   -1.13    1.60
   2   6  13    0.30    0.76
  -2  -6 -13    2.03    1.69
  -2   6 -13    1.45    1.89
   2   6  13   -0.15    0.77
   2  -6  14   58.72    5.29
  -2   6 -14   61.21    5.07
  -2  -6 -14   54.66    5.81
  -2   6 -14   60.79    5.17
   2   6  14   54.80    3.67
   2  -6  15    1.62    1.65
  -2   6 -15    1.26    1.44
  -2  -6 -15    1.33    1.83
  -2   6 -15    0.50    1.35
   2   6  15    1.11    1.10
   2  -6  16    2.39    2.16
  -2   6 -16    1.81    1.89
  -2  -6 -16   -2.32    1.75
  -2   6 -16    0.01    1.56
   2   6  16    0.62    1.14
   2  -6  17    0.66    1.32
  -2   6 -17   -1.71    1.66
  -2  -6 -18    7.58    3.23
   2  -6  18    8.07    2.56
  -2   6 -18    7.43    2.49
  -2   6 -18    6.10    2.63
  -2  -6 -19   -0.51    1.98
   2  -6  19    0.23    1.80
  -2   6 -19   -0.16    1.62
  -2   6 -19   -2.88    2.07
  -2  -6 -20   24.25    5.03
  -2   6 -20   17.68    3.69
  -2   6 -20   15.83    3.68
   2  -6  20   10.69    2.70
   2   8 -19    5.65    2.74
   2   8 -19   -0.25    1.75
  -2  -8  19    2.77    2.19
   2   8 -18  115.79    8.41
   2   8 -18  110.90    8.05
  -2  -8  18  116.56    8.69
   2   8 -17   -1.11    1.60
   2   8 -17    0.63    1.62
  -2  -8  17   -1.22    1.66
   2   8 -16   -1.12    1.68
   2   8 -16   -0.77    1.39
  -2  -8  16    3.40    2.39
   2   8 -15   21.12    3.47
   2   8 -15   25.79    3.59
  -2  -8  15   26.85    4.13
   2   8 -14    2.39    1.51
   2   8 -14    3.19    1.61
  -2  -8  13   36.55    4.60
   2   8 -13   29.27    3.71
   2   8 -13   32.74    3.90
   2   8 -12    0.09    1.12
   2   8 -12    0.05    1.35
  -2  -8  12    2.16    1.75
   2   8 -11    6.65    1.95
  -2  -8  11    3.84    2.05
  -2   8  11    3.66    0.66
   2   8 -11    6.45    1.95
   2   8 -10    2.31    1.28
  -2  -8  10    1.47    1.64
  -2   8  10    1.25    0.63
   2   8 -10    1.01    1.16
   2   8  -9  126.01    6.83
   2   8  -9  123.57    6.54
  -2   8   9  126.65    4.56
  -2  -8   9  126.46    7.76
  -2  -8   8   27.24    3.48
   2   8  -8   24.13    2.94
  -2   8   8   23.66    2.09
   2   8  -8   20.67    2.65
  -2  -8   7    2.25    1.46
  -2   8   7   -0.85    0.92
   2   8  -7    2.53    1.45
  -2  -8   7    1.95    1.21
   2   8  -7    2.77    1.41
  -2  -8   6   38.48    3.97
  -2   8   6   41.78    2.99
   2   8  -6   39.54    3.62
   2   8  -6   41.26    3.65
  -2  -8   6   43.82    3.59
  -2  -8   5   -0.12    1.16
  -2   8   5   -0.52    1.40
   2  -8  -5    2.08    1.21
  -2   8   5    1.55    0.74
   2   8  -5    0.42    1.14
   2   8  -5    0.61    0.92
  -2  -8   5    0.55    0.94
   2   8  -4    0.92    1.07
  -2  -8   4    1.66    0.95
  -2   8   4    0.87    0.95
  -2   8   4    1.24    1.29
   2  -8  -4   -0.38    0.93
  -2  -8   4   -0.06    1.15
  -2   8   3  202.68    7.47
  -2  -8   3  219.31    9.05
  -2  -8   3  234.31   10.03
   2   8  -3  228.10    8.48
  -2   8   3  224.11    9.08
   2  -8  -3  215.80    8.29
  -2  -8   3  230.82    7.22
  -2   8   2    1.73    1.09
   2   8  -2    1.56    1.06
  -2  -8   2    1.61    1.31
  -2   8   2   -0.34    1.02
   2  -8  -2   -0.22    0.94
  -2  -8   2    2.13    1.12
   2   8  -2    0.24    1.16
  -2  -8   2    2.15    0.99
   2  -8  -2    0.78    0.44
   2  -8  -2    0.87    0.51
   2  -8  -1  184.81    7.99
  -2   8   1  197.07    7.91
   2   8  -1  185.87    7.87
  -2  -8   1  182.84    5.74
  -2   8   1  185.79    7.42
  -2  -8   1  178.35    7.83
   2   8  -1  169.10    7.23
   2  -8  -1  189.21    5.55
   2  -8   0   58.76    4.56
  -2   8   0   64.31    4.32
   2   8   0   63.48    4.58
  -2  -8   0   60.48    2.93
   2   8   0   58.66    3.98
  -2  -8   0   54.72    4.19
  -2   8   0   59.96    4.19
   2  -8   0   62.76    3.35
   2  -8   1   68.75    4.91
  -2   8  -1   68.04    4.35
   2   8   1   69.46    4.93
   2  -8   1   63.17    3.69
   2   8   1   67.42    4.13
  -2  -8  -1   66.09    4.47
  -2   8  -1   64.57    4.50
  -2  -8  -1   70.35    2.86
  -2   8  -2   11.77    1.96
  -2   8  -2   13.60    2.29
   2   8   2   14.47    1.94
  -2  -8  -2   10.96    1.00
   2   8   2   11.02    2.18
   2  -8   2   13.92    2.34
  -2  -8  -2    8.34    1.64
   2  -8   2   17.08    2.69
  -2   8  -3  195.67    7.48
   2  -8   3  205.63    9.12
   2  -8   3  222.96    9.18
   2   8   3  215.18    9.51
  -2   8  -3  209.66    8.04
   2   8   3  197.06    7.06
  -2   8  -4    0.94    0.92
   2   8   4    0.88    1.47
  -2  -8  -4    1.80    1.10
   2  -8   4    0.29    1.14
   2  -8   4    2.54    1.47
  -2   8  -4    1.43    1.16
   2   8   4    0.70    0.72
  -2   8  -5    5.92    1.62
  -2  -8  -5    6.55    1.43
   2  -8   5    7.28    1.78
   2   8   5    5.24    1.87
   2  -8   5    9.81    2.25
  -2   8  -5    4.32    1.41
   2   8   5    7.32    1.28
  -2   8  -6    1.14    0.93
   2  -8   6    1.58    1.52
  -2  -8  -6    1.55    0.90
   2   8   6   -0.37    0.83
  -2   8  -6    1.41    1.39
  -2   8  -7  133.14    6.38
  -2  -8  -7  140.68    5.64
  -2   8  -7  141.15    6.89
   2  -8   7  143.31    8.09
   2   8   7  129.75    4.78
  -2   8  -8    1.34    1.11
  -2  -8  -8    3.13    1.02
  -2   8  -8    0.30    1.30
  -2   8  -9    5.01    1.73
   2  -8   9    7.52    2.11
  -2   8  -9    8.41    2.03
  -2   8 -10   43.31    3.94
   2  -8  10   45.56    4.90
  -2   8 -10   33.90    3.78
  -2   8 -11   39.33    3.99
  -2   8 -11   45.04    4.26
   2  -8  11   41.26    4.91
   2  -8  12    0.75    1.80
  -2   8 -12    0.68    1.36
  -2   8 -12    5.09    1.83
   2  -8  13    2.23    1.65
  -2   8 -13    2.04    1.53
  -2   8 -13   -1.68    1.39
  -2   8 -14   58.58    5.48
   2  -8  14   65.34    6.15
  -2   8 -14   67.97    5.84
  -2   8 -15  152.76    8.74
  -2   8 -15  163.71    9.22
   2  -8  15  164.62    9.99
  -2   8 -16    2.59    1.98
  -2   8 -16    5.47    2.16
  -2   8 -17   14.21    3.29
  -2   8 -17   18.48    3.65
   2  -8  17   15.60    3.41
  -2   8 -18   65.02    6.42
  -2   8 -18   66.48    6.38
   2  -8  18   64.51    6.50
   2  10 -17    1.10    1.67
   2  10 -17   -1.18    2.12
  -2 -10  17    0.21    1.89
   2  10 -16   10.41    2.97
   2  10 -16   10.49    2.75
  -2 -10  16   10.48    3.16
  -2 -10  15   47.19    5.86
   2  10 -15   36.86    4.68
   2  10 -15   40.14    4.80
   2  10 -14   73.34    6.41
   2  10 -14   89.68    6.75
  -2 -10  14   88.80    7.88
   2  10 -13   45.25    5.04
  -2 -10  13   58.73    6.39
   2  10 -13   49.76    4.98
   2  10 -12    0.39    1.48
  -2 -10  12    1.02    1.72
   2  10 -12    1.79    1.61
   2  10 -11    2.96    1.63
  -2 -10  11    8.14    2.84
   2  10 -11    6.14    2.14
   2  10 -10   42.77    4.38
   2  10 -10   45.74    4.60
   2  10  -9   29.64    3.57
  -2 -10   9   27.23    4.21
   2  10  -9   29.42    3.57
   2  10  -8   29.08    3.49
  -2  10   8   25.95    2.58
  -2 -10   8   20.11    3.62
  -2  10   8   23.53    3.90
   2  10  -7   43.41    4.27
  -2  10   7   43.91    3.50
  -2 -10   7   49.92    5.25
   2  10  -7   45.31    4.33
  -2  10   7   48.49    5.25
   2  10  -6   95.80    6.23
  -2 -10   6  108.24    7.61
   2  10  -6   96.14    6.17
  -2  10   6  103.41    7.38
   2 -10  -5   21.43    3.02
  -2 -10   5   22.17    3.67
  -2  10   5   19.87    3.27
  -2  10   5   18.17    2.37
   2  10  -5   22.39    3.21
   2  10  -5   22.92    3.16
  -2 -10   5   13.30    2.15
  -2 -10   4    0.39    0.99
   2  10  -4   -1.33    1.13
   2 -10  -4   -1.05    1.68
  -2  10   4    1.19    1.36
  -2 -10   4    3.47    1.93
   2  10  -3   53.96    4.63
  -2 -10   3   45.23    3.41
  -2 -10   3   53.46    5.03
  -2  10   3   51.72    4.74
   2 -10  -3   48.89    4.55
  -2 -10   2 1566.15   32.05
   2  10  -2 1620.58   30.66
  -2  10   2 1586.51   30.84
   2 -10  -2 1548.09   31.03
  -2 -10   2 1506.31   25.84
   2 -10  -2 1377.35   21.85
   2 -10  -2 1429.97   22.49
   2 -10  -1    3.14    1.57
   2 -10  -1    2.77    0.88
  -2 -10   1    3.50    1.13
   2 -10  -1    2.20    0.82
   2  10  -1    1.43    1.38
  -2  10   1    0.37    1.34
  -2 -10   0    2.67    1.62
   2 -10   0    1.79    1.72
  -2  10   0    1.87    1.39
   2  10   0    1.45    1.66
  -2 -10   0    0.52    0.65
   2 -10   0    1.26    0.83
   2 -10   0    0.40    0.73
   2 -10   1   29.82    2.70
   2 -10   1   27.46    2.40
  -2 -10  -1   25.63    1.89
   2 -10   1   31.84    4.01
  -2 -10  -1   29.48    3.40
  -2  10  -1   30.29    3.46
   2  10   1   33.48    4.04
   2  10   2 1224.34   26.39
   2 -10   2 1242.10   27.15
   2 -10   2 1230.68   22.28
  -2  10  -2 1231.36   23.94
  -2 -10  -2 1117.62   24.37
  -2  10  -3   -2.10    1.40
   2 -10   3   -0.19    1.05
  -2  10  -3    2.10    1.19
   2 -10   3   -0.60    1.49
  -2 -10  -3    1.50    1.24
  -2  10  -4   -0.81    1.30
  -2 -10  -4    0.41    1.22
   2  10   4   -2.31    2.04
   2 -10   4    0.16    1.39
  -2  10  -4    1.47    1.29
   2  10   4    1.20    0.79
  -2  10  -5    9.82    1.98
   2  10   5   15.31    3.40
  -2 -10  -5   12.59    2.15
   2 -10   5    8.78    2.53
  -2  10  -5   12.13    2.34
   2  10   5    9.16    1.68
  -2  10  -6   10.46    2.21
   2  10   6    7.61    2.50
   2 -10   6   12.09    2.85
  -2 -10  -6    3.48    1.27
   2  10   6    5.03    1.29
  -2  10  -6    8.71    2.27
  -2  10  -7   16.88    2.71
  -2 -10  -7   23.72    2.77
   2 -10   7   23.23    3.75
   2  10   7   23.99    3.99
   2  10   7   16.90    2.02
  -2  10  -7   20.68    3.08
  -2  10  -8   18.12    2.92
   2  10   8   15.53    3.40
  -2 -10  -8   19.26    2.43
   2 -10   8   17.51    3.35
  -2  10  -8   17.85    3.00
  -2  10  -9   20.59    2.99
   2 -10   9   26.74    4.16
  -2  10  -9   17.04    2.98
  -2  10 -10   92.27    6.52
  -2  10 -10   99.13    6.49
   2 -10  10  111.75    8.34
  -2  10 -11   11.05    2.48
   2 -10  11   11.80    3.10
  -2  10 -11    8.43    2.32
  -2  10 -12   16.08    2.74
  -2  10 -12   16.07    2.89
   2 -10  12   19.14    3.77
   2 -10  13    8.09    2.64
  -2  10 -13    4.54    1.95
  -2  10 -13   11.37    2.65
  -2  10 -14   53.07    5.41
  -2  10 -14   61.63    5.95
   2 -10  14   55.72    6.31
   2 -10  15   14.73    3.52
  -2  10 -15   16.61    3.46
  -2  10 -15   10.67    3.06
   2 -10  16    4.01    2.47
  -2  10 -16    4.65    2.22
  -2  10 -16    2.28    1.89
   2  12 -13   17.45    3.45
  -2 -12  13   19.06    4.20
   2  12 -13   17.01    3.46
   2  12 -12   18.87    3.49
  -2 -12  12   23.53    4.60
  -2  12  12   29.77    5.32
   2  12 -12   22.41    3.66
   2  12 -11    1.90    1.67
  -2  12  11    6.61    2.99
  -2 -12  11    4.23    2.48
   2  12 -11    1.67    1.80
   2  12 -10    7.07    2.31
  -2 -12  10    7.71    2.94
  -2  12  10    8.55    3.19
   2  12 -10    5.95    2.09
   2  12  -9    2.62    1.73
  -2 -12   9   -2.26    2.60
  -2  12   9    4.29    2.54
   2  12  -9    2.08    1.49
   2  12  -8    3.96    2.06
  -2  12   8    3.69    2.23
  -2 -12   8    7.47    2.91
   2  12  -8    1.70    1.67
   2  12  -7    3.02    1.76
  -2 -12   7   -1.20    1.90
  -2  12   7   -1.93    2.08
   2  12  -7   -0.44    1.53
  -2 -12   6   -0.91    1.68
  -2  12   6    2.90    1.92
   2  12  -6    1.13    1.33
  -2  12   5   53.54    5.68
   2  12  -5   47.28    4.81
  -2 -12   5   51.23    5.72
   2  12  -5   47.03    4.87
   2  12  -4    5.35    2.03
  -2  12   4    0.82    1.66
   2 -12  -4    1.14    1.31
  -2 -12   4    1.64    1.58
   2  12  -4    1.94    1.85
  -2 -12   3   35.14    4.65
   2 -12  -3   32.54    4.22
  -2  12   3   32.23    4.18
   2  12  -3   30.90    4.01
  -2 -12   2   13.77    3.22
   2 -12  -2   10.62    2.95
  -2  12   2    8.70    2.31
   2  12  -2    9.82    2.43
   2 -12  -1    3.16    2.01
  -2 -12   1    0.67    1.92
  -2 -12   1    1.31    1.09
  -2  12   1    1.42    1.52
   2  12  -1   -1.50    1.50
  -2  12   0    6.44    2.22
   2  12   0    3.76    2.00
  -2 -12   0    2.84    0.85
  -2 -12   0    2.37    1.75
   2 -12   0    2.61    1.55
   2 -12   0    3.15    1.07
   2 -12   1    0.06    1.62
  -2 -12  -1    2.12    1.52
   2 -12   1    2.42    1.26
   2  12   1   -0.63    1.65
  -2  12  -1    1.82    1.59
   2 -12   2    9.94    2.68
  -2 -12  -2    9.97    2.56
   2 -12   2   10.73    2.02
  -2  12  -2   11.12    2.30
   2  12   2    7.77    2.56
   2  12   3   24.20    3.84
   2 -12   3   25.38    4.08
  -2 -12  -3   25.29    3.74
  -2  12  -3   28.98    3.72
   2 -12   3   20.85    3.03
  -2  12  -3   23.94    3.30
   2 -12   4   -0.84    2.13
  -2 -12  -4   -0.07    1.35
   2  12   4   -0.64    1.90
  -2  12  -4   -1.24    1.34
  -2  12  -4    2.68    1.91
   2 -12   4    1.13    1.20
  -2  12  -5    9.13    2.36
   2 -12   5    1.99    1.42
  -2  12  -5    4.98    2.11
   2  12   5    3.91    2.16
   2 -12   5    4.61    1.96
  -2 -12  -5    7.28    2.18
  -2  12  -6   -1.43    1.50
   2 -12   6    1.31    1.34
   2 -12   6   -2.13    2.53
  -2 -12  -6   -1.44    1.49
   2  12   6   -0.80    1.93
  -2  12  -6    1.49    1.61
  -2  12  -7   -0.17    1.39
   2 -12   7    1.53    1.49
  -2 -12  -7    0.14    1.34
   2 -12   7    0.95    2.28
  -2  12  -7    0.54    1.44
  -2  12  -8    2.80    1.76
   2 -12   8    8.88    2.65
   2 -12   8    6.07    2.87
   2  12   8   12.58    3.59
  -2  12  -8    9.44    2.74
  -2  12  -9    2.37    1.74
   2 -12   9    3.09    1.99
   2  12   9    1.38    1.81
   2 -12   9   -0.27    2.13
  -2  12  -9    6.42    2.21
  -2  12 -10   31.76    4.01
   2 -12  10   40.82    5.16
   2 -12  10   39.60    5.74
   2  12  10   49.09    6.50
  -2  12 -10   38.94    4.72
  -2  12 -11   13.69    3.00
   2 -12  11    7.77    2.55
   2  12  11    7.62    2.82
   2 -12  11   10.08    3.03
  -2  12 -11    9.52    2.76
  -2  12 -12    0.28    1.62
   2  12  12    1.80    2.23
   2 -12  12    4.49    3.02
  -2  12 -12    2.32    1.85
   2 -12  12   -1.02    2.18
   2 -12  13    1.96    2.66
   2 -12  13    8.18    2.92
  -2  12 -13    7.43    2.50
  -2  12 -13    5.52    2.17
  -2 -14   8   21.28    5.08
  -2  14   8   15.88    3.77
   2  14  -8   11.74    3.11
   2  14  -8   15.17    3.42
   2  14  -7  111.06    8.19
  -2  14   7  130.77    9.47
  -2 -14   7  109.61    9.64
   2  14  -7  110.39    8.00
   2  14  -6   79.34    7.02
  -2  14   6   92.58    7.88
  -2 -14   6   80.58    8.23
   2  14  -6   80.68    6.77
   2  14  -5   39.36    4.87
  -2 -14   5   43.75    6.01
  -2  14   5   54.49    6.02
   2  14  -5   40.21    4.81
   2  14  -4    3.06    2.31
  -2 -14   4    0.60    2.14
  -2  14   4   -2.25    2.10
   2  14  -4   -0.50    1.78
   2  14  -3   65.89    6.26
   2 -14  -3   55.50    6.18
  -2  14   3   64.23    6.17
  -2 -14   3   62.43    6.83
   2  14  -3   64.89    6.18
  -2 -14   2    3.07    1.95
   2 -14  -2    7.58    2.61
   2  14  -2   10.28    2.91
  -2  14   2   12.11    2.93
  -2 -14   1   18.45    3.62
   2 -14  -1   14.82    3.90
   2  14  -1   22.15    3.72
  -2  14   1   15.86    3.16
   2 -14   0    0.85    2.12
  -2 -14   0   -0.76    1.97
  -2  14   0    3.63    1.96
  -2  14  -1   41.36    5.11
  -2 -14  -1   35.51    4.84
   2 -14   1   34.73    5.22
  -2  14  -1   35.36    4.38
  -2  14  -2   34.10    4.54
   2 -14   2   24.23    4.55
  -2 -14  -2   29.99    4.47
   2  14   2   29.20    4.35
  -2  14  -2   27.61    3.96
  -2  14  -3   18.95    3.69
   2 -14   3   17.14    3.96
  -2 -14  -3   17.35    3.72
  -2  14  -3   17.70    3.21
   2  14   3   22.38    4.06
  -2  14  -4    2.39    2.05
  -2 -14  -4   -0.40    1.75
   2 -14   4   -1.02    2.14
   2  14   4   -4.64    2.74
  -2  14  -4    4.79    2.16
  -2  14  -5   11.96    3.14
  -2  14  -5    7.82    2.60
   2  14   5   14.51    3.78
   2 -14   5    9.91    3.35
  -2 -14  -5    9.03    2.76
  -2  14  -6   30.24    4.10
  -2  14  -6   30.88    4.43
   2  14   6   30.87    5.01
   2 -14   6   29.34    5.06
  -2  14  -7    1.68    1.82
  -2  14  -7    1.35    1.93
   2 -14   7   -0.81    2.31
   2  14   7   -0.83    2.32
   3   1 -23   22.22    4.65
   3  -1 -23   23.13    4.78
   3  -1 -22   32.60    5.31
   3   1 -22   41.50    5.64
   3   1 -21   72.61    6.66
   3  -1 -21   75.49    7.14
   3   1 -21   74.95    6.84
   3   1 -20    0.37    1.44
   3  -1 -20   -0.14    1.84
   3   1 -20    1.62    1.77
   3  -1 -19   92.05    7.56
   3   1 -19   89.85    6.93
   3   1 -19   88.86    7.00
  -3  -1  19   85.04    4.95
   3  -1 -18  156.74    9.27
  -3  -1  18  158.02    6.73
   3   1 -18  158.70    8.93
  -3   1  18  136.07    4.68
   3   1 -17   20.00    3.13
   3  -1 -17   27.92    3.87
  -3  -1  17   23.53    2.47
   3   1 -17   21.59    3.39
  -3   1  17   26.49    1.99
   3  -1 -16   16.74    3.13
   3   1 -16   12.84    2.54
  -3   1  16   15.88    1.56
  -3  -1  16   15.21    1.95
   3   1 -16   16.01    2.70
   3   1 -15   12.57    2.37
   3  -1 -15   15.87    2.85
   3  -1 -15   14.14    2.65
   3   1 -15   12.18    2.58
  -3  -1  15   11.38    1.64
  -3   1  15   11.97    1.41
  -3   1  14    8.89    1.74
  -3   1  14    7.09    1.11
  -3  -1  14    8.37    1.46
   3   1 -14    6.72    1.61
   3  -1 -14    6.83    1.85
   3  -1 -14    5.88    1.80
   3   1 -14    6.65    1.72
  -3  -1  14    9.21    1.71
  -3   1  14    8.75    1.72
  -3   1  13  246.90    6.27
  -3  -1  13  244.27    7.61
   3  -1 -13  245.07    9.20
  -3   1  13  242.88    8.38
   3   1 -13  265.98    9.61
   3  -1 -13  249.16    9.45
  -3  -1  13  245.45    8.09
  -3   1  13  240.75    8.14
   3   1 -13  260.75    8.95
  -3   1  12    6.14    0.86
  -3  -1  12    5.40    1.13
   3  -1 -12    4.57    1.42
  -3   1  12    6.11    1.33
  -3  -1  12    6.11    1.46
   3  -1 -12    6.41    1.85
  -3   1  12    4.70    1.41
   3   1 -12    3.30    1.29
  -3   1  12    5.72    1.32
   3   1 -12    6.25    1.53
  -3  -1  12    5.79    1.23
  -3   1  11  177.17    4.68
  -3  -1  11  175.42    5.81
   3  -1 -11  173.42    6.87
  -3   1  11  185.10    6.52
  -3   1  11  180.11    6.96
  -3  -1  11  171.37    6.92
   3   1 -11  178.84    7.20
   3  -1 -11  176.35    7.22
  -3   1  11  183.48    6.32
  -3  -1  11  186.53    6.32
   3   1 -11  179.91    6.64
  -3  -1  10   69.47    3.35
  -3   1  10   65.90    2.56
   3  -1 -10   68.18    4.06
  -3   1  10   68.67    3.64
  -3  -1  10   67.49    4.05
   3   1 -10   59.39    4.00
  -3   1  10   69.05    4.08
   3  -1 -10   74.64    4.34
  -3  -1  10   63.89    3.40
   3   1 -10   69.77    3.74
  -3   1  10   69.43    3.59
  -3   1   9  425.32    8.08
  -3  -1   9  429.32    9.49
   3  -1  -9  451.68   10.80
  -3   1   9  453.99   10.16
  -3  -1   9  431.34   10.49
   3  -1  -9  442.45   10.91
  -3   1   9  462.14   10.89
  -3   1   9  461.68   10.10
   3   1  -9  420.36    9.88
  -3  -1   9  448.73    9.87
  -3  -1   8   82.92    3.45
  -3   1   8   79.03    2.63
   3  -1  -8   76.43    3.86
  -3   1   8   84.29    3.62
  -3  -1   8   87.21    4.08
   3   1  -8   80.28    3.91
   3  -1  -8   77.51    4.02
  -3   1   8   84.99    3.97
   3   1  -8   77.82    3.46
  -3   1   8   83.71    3.59
  -3  -1   8   82.05    3.47
   3   1  -7    0.03    0.45
  -3   1   7    0.45    0.37
  -3  -1   7    0.24    0.59
   3  -1  -7    0.19    0.62
  -3   1   7   -0.06    0.56
  -3  -1   7   -0.54    0.83
   3  -1  -7    0.44    0.73
   3   1  -7    1.20    0.85
  -3   1   7   -0.28    0.69
   3   1  -7    0.50    0.68
  -3   1   7   -0.03    0.59
  -3  -1   7   -0.10    0.53
   3   1  -6  412.26    8.45
  -3  -1   6  414.93    8.54
   3  -1  -6  393.19    8.87
  -3   1   6  422.64    8.44
  -3  -1   6  412.78    9.00
   3   1  -6  422.23    9.12
  -3   1   6  433.48    9.08
   3  -1  -6  415.05    9.07
   3   1  -6  417.93    8.25
  -3   1   6  415.36    8.38
  -3  -1   6  422.75    8.15
  -3  -1   5 2531.31   36.88
   3  -1  -5 2545.02   37.04
  -3   1   5 2583.37   36.51
  -3  -1   5 2655.22   37.70
  -3  -1   5 2645.60   37.39
   3   1  -5 2645.83   37.38
   3  -1  -5 2586.52   37.27
  -3  -1   5 2578.08   36.15
  -3   1   5 2644.33   37.26
   3   1  -5 2534.87   36.20
  -3   1   5 2570.39   36.52
  -3  -1   4   50.45    2.16
   3  -1  -4   52.57    2.23
  -3   1   4   48.30    1.95
  -3  -1   4   48.42    2.27
   3  -1  -4   51.87    1.98
  -3  -1   4   45.25    2.16
   3   1  -4   50.61    2.23
  -3  -1   4   44.57    1.76
  -3   1   4   47.95    2.16
   3  -1  -4   51.87    2.19
  -3   1   4   45.89    1.96
   3   1  -4   51.06    1.86
   3  -1  -3    9.57    0.86
  -3   1   3   10.25    0.86
  -3  -1   3   10.62    0.95
   3   1  -3    9.23    0.94
  -3  -1   3   10.85    0.98
   3  -1  -3   10.77    0.92
   3   1  -3   10.22    0.74
  -3   1   3   10.58    0.85
  -3  -1   3    9.79    0.75
  -3  -1   3    9.85    0.95
  -3   1   3   10.64    0.86
   3   1  -3   10.41    0.95
   3  -1  -3   11.64    0.85
  -3   1   2   94.13    2.53
   3   1  -2   97.96    2.69
  -3  -1   2   94.90    2.71
  -3   1   2   92.77    2.28
  -3  -1   2   91.82    2.75
   3  -1  -2   99.29    2.52
   3   1  -2   93.86    2.75
   3  -1  -1   12.49    0.88
   3   1  -1   15.38    0.99
   3   1  -1   15.10    1.00
  -3   1   0  166.59    3.17
   3  -1   0  168.63    3.89
   3   1   0  161.36    3.57
  -3   1  -1   35.72    1.42
  -3   1  -1   35.10    1.75
   3   1   1   27.48    1.53
   3  -1   1   31.39    1.73
  -3  -1  -1   38.90    1.89
  -3   1  -1   35.20    1.79
   3  -1   1   36.35    1.10
  -3   1  -1   37.40    1.12
   3  -1   1   36.43    1.48
  -3  -1  -1   39.44    1.67
   3  -1   2    2.09    0.46
  -3   1  -2    2.10    0.54
  -3   1  -2    2.69    0.69
  -3  -1  -2    2.59    0.70
   3   1   2    2.47    0.63
   3  -1   2    2.41    0.48
  -3   1  -2    2.44    0.50
  -3  -1  -2    2.33    0.58
   3  -1   2    2.37    0.80
   3   1   2    2.57    0.59
   3  -1   3 2588.12   37.05
  -3   1  -3 2658.54   37.13
  -3  -1  -3 2614.72   36.91
   3   1   3 2615.12   36.84
  -3  -1  -3 2583.03   37.66
   3  -1   3 2512.29   37.96
   3  -1   3 2514.84   36.05
  -3   1  -3 2645.75   36.16
   3  -1   3 2583.10   36.59
  -3   1  -3 2650.40   36.76
  -3   1  -4   55.24    2.54
   3  -1   4   52.98    2.50
   3   1   4   55.10    2.57
  -3  -1  -4   48.11    2.72
   3  -1   4   48.98    2.32
  -3   1  -4   55.86    2.39
   3   1   4   53.70    2.65
   3  -1   4   54.06    2.51
  -3   1  -4   54.77    2.57
   3  -1   5   -0.47    0.63
  -3  -1  -5    0.49    0.30
  -3   1  -5    0.19    0.52
   3   1   5    1.04    0.75
   3   1   5    0.89    0.59
  -3  -1  -5    1.31    0.82
   3  -1   5    0.45    0.51
   3   1   5    0.50    0.50
  -3   1  -5    0.53    0.58
   3  -1   5    0.20    0.61
  -3   1  -5    0.69    0.78
  -3  -1  -6  129.40    3.08
  -3   1  -6  123.11    4.21
   3  -1   6  123.75    4.29
   3   1   6  124.09    4.68
  -3  -1  -6  121.25    5.01
   3  -1   6  118.70    4.29
   3   1   6  124.10    4.64
  -3   1  -6  128.44    4.53
   3   1   6  125.60    4.69
  -3   1  -6  122.40    4.61
   3  -1   6  119.27    4.50
  -3   1  -7   44.02    2.52
  -3  -1  -7   46.06    1.71
   3  -1   7   42.48    2.59
   3  -1   7   42.58    2.76
  -3   1  -7   45.03    2.91
   3   1   7   44.43    2.85
   3   1   7   39.04    2.68
  -3  -1  -7   44.48    3.19
  -3   1  -7   45.05    2.95
   3  -1   7   42.46    2.74
  -3   1  -8   19.43    1.72
  -3  -1  -8   20.99    1.18
   3  -1   8   19.29    1.88
  -3  -1  -8   16.74    2.14
   3  -1   8   20.97    2.08
  -3   1  -8   21.55    2.11
   3   1   8   18.27    1.99
  -3   1  -8   21.26    2.27
   3  -1   8   22.22    2.22
   3   1   8   20.14    2.04
  -3   1  -9  102.98    4.08
  -3  -1  -9  102.26    2.89
   3  -1   9   99.17    4.28
   3  -1   9  100.88    4.82
   3   1   9  103.67    4.98
  -3   1  -9  106.35    5.03
   3   1   9   96.69    4.79
  -3  -1  -9  107.21    5.37
  -3   1  -9  106.63    5.13
   3  -1   9   98.57    4.69
  -3   1 -10  117.43    4.48
  -3  -1 -10  114.96    3.18
   3  -1  10  121.04    4.88
  -3  -1 -10  115.06    5.93
   3  -1  10  112.10    5.37
  -3   1 -10  110.00    5.36
   3   1  10  116.85    5.48
   3   1  10  110.37    5.31
  -3   1 -10  111.41    5.58
   3  -1  10  117.50    5.30
  -3   1 -11   61.39    3.27
  -3  -1 -11   63.32    2.30
   3  -1  11   59.16    3.48
  -3  -1 -11   61.24    4.48
   3  -1  11   64.05    4.08
   3   1  11   62.29    4.23
  -3   1 -11   63.98    4.25
   3   1  11   64.49    4.15
   3  -1  11   60.11    3.93
  -3   1 -11   62.45    4.34
  -3   1 -12    0.52    1.24
  -3  -1 -12    1.22    1.48
  -3   1 -12    0.86    0.62
  -3  -1 -12    1.09    0.40
  -3   1 -12    0.25    0.99
   3  -1  12    1.04    0.78
  -3  -1 -13   12.31    2.54
  -3   1 -13    8.94    1.87
  -3   1 -13    8.62    1.37
  -3   1 -13    8.08    1.89
   3  -1  13    8.48    1.51
  -3   1 -14    8.51    2.07
  -3   1 -14   12.11    2.36
  -3  -1 -14   11.70    2.52
  -3   1 -14   10.58    1.48
  -3   1 -15   14.50    2.70
  -3  -1 -15   13.93    2.89
  -3   1 -15   16.29    2.88
  -3   1 -15   17.13    1.93
  -3   1 -16    6.12    1.93
  -3  -1 -16   11.39    2.81
   3   1  16    5.15    1.95
  -3   1 -16    5.32    1.79
  -3   1 -16    7.28    1.43
  -3   1 -17  241.48   10.82
  -3   1 -17  242.92   11.39
  -3  -1 -17  204.78   11.02
   3   1  17  240.90   10.97
  -3   1 -18   11.65    3.06
  -3  -1 -18   11.14    2.85
   3   1  18   10.60    2.48
  -3   1 -19    5.67    2.52
  -3  -1 -19    3.62    2.15
   3  -1  19   10.93    3.08
   3   1  19    6.42    2.38
   3  -1  20   58.85    6.40
  -3  -1 -20   62.12    7.11
  -3   1 -20   63.02    6.53
   3   1  20   58.67    6.06
   3   1  21   13.91    3.40
  -3   1 -21    4.04    2.52
  -3  -1 -21   11.25    3.46
   3  -1  21    9.42    3.24
   3   1  22    2.83    2.43
  -3   1 -22    1.31    2.43
  -3  -1 -22    4.78    2.58
   3  -1  22    2.96    2.06
   3   3 -22    6.33    2.65
   3  -3 -22   11.67    3.79
   3   3 -22    6.39    2.42
   3  -3 -21   45.26    5.90
   3   3 -21   46.81    5.53
   3   3 -21   46.80    5.38
   3  -3 -20    2.22    2.34
   3   3 -20    0.94    1.49
  -3  -3  20   -0.63    1.19
   3   3 -20    0.47    1.73
   3  -3 -19    6.21    2.67
   3   3 -19   10.54    2.87
   3   3 -19    9.81    2.69
  -3  -3  19    9.28    1.94
   3   3 -18   29.66    3.92
   3  -3 -18   37.83    5.06
   3   3 -18   34.38    4.40
  -3  -3  18   32.06    3.59
   3  -3 -17    2.56    2.17
   3   3 -17    2.80    1.58
   3   3 -17    2.26    1.71
  -3  -3  17   -0.42    1.03
  -3  -3  16    1.85    1.24
   3   3 -16   -0.15    1.19
   3  -3 -16   -0.74    1.48
   3   3 -16   -0.65    1.61
  -3   3  16    0.01    1.05
  -3  -3  15   17.37    2.48
   3   3 -15   17.82    2.57
   3   3 -15   14.35    2.81
  -3   3  15   16.32    2.18
   3  -3 -15   16.15    3.09
  -3   3  14   39.18    3.25
   3   3 -14   37.10    3.17
  -3  -3  14   38.88    3.48
   3   3 -14   41.97    3.96
   3   3 -14   34.54    3.35
   3  -3 -14   40.44    4.44
  -3   3  13   36.60    2.93
   3   3 -13   34.11    3.02
  -3  -3  13   36.40    3.18
   3   3 -13   32.90    3.43
  -3  -3  13   32.89    3.04
   3   3 -13   37.41    3.35
  -3   3  13   35.89    3.23
   3  -3 -13   38.72    3.95
  -3   3  12   14.90    1.82
   3  -3 -12   17.33    2.60
  -3  -3  12   16.01    2.16
   3   3 -12   19.43    2.24
   3   3 -12   16.27    2.49
  -3  -3  12   15.30    2.06
  -3   3  12   17.15    2.24
   3   3 -12   17.17    2.18
  -3   3  11   15.53    1.69
   3  -3 -11   12.27    2.24
  -3   3  11   14.43    1.97
   3   3 -11   14.03    1.81
  -3  -3  11   17.14    2.16
  -3  -3  11   12.64    1.95
   3   3 -11   10.08    2.11
  -3   3  11   15.70    2.17
  -3  -3  11   14.86    1.96
   3   3 -11   14.15    1.87
  -3   3  10  358.63    8.43
   3  -3 -10  336.30   10.98
   3   3 -10  346.19    9.56
  -3   3  10  346.97    5.70
  -3  -3  10  337.84    9.81
  -3  -3  10  352.46   10.28
   3   3 -10  349.88   10.27
  -3   3  10  339.48    9.98
  -3  -3  10  352.88    9.40
   3   3 -10  343.81    9.44
  -3   3  10  353.47    9.92
  -3   3   9   12.10    1.30
   3  -3  -9   11.24    1.95
   3   3  -9    9.98    1.41
  -3  -3   9    9.79    1.60
  -3  -3   9   10.46    1.76
  -3   3   9    8.15    1.44
   3   3  -9    7.61    1.54
  -3  -3   9    7.65    1.37
   3   3  -9    8.27    1.42
  -3   3   8    2.12    0.62
   3  -3  -8    1.59    1.23
  -3   3   8    2.60    1.01
  -3  -3   8    2.27    1.08
   3   3  -8    2.43    0.94
   3   3  -8    2.53    1.01
  -3  -3   8    1.99    1.02
  -3   3   8    2.57    0.97
  -3  -3   8    2.99    0.94
   3   3  -8    1.70    0.89
  -3   3   7   65.52    2.59
   3   3  -7   74.50    3.75
  -3  -3   7   70.42    3.73
   3  -3  -7   62.28    3.90
  -3   3   7   66.93    3.72
  -3  -3   7   69.74    3.65
   3   3  -7   67.23    3.67
  -3  -3   7   70.13    3.38
  -3   3   7   73.13    3.67
   3   3  -7   68.44    3.28
   3   3  -6  242.36    6.98
  -3  -3   6  234.70    7.05
  -3   3   6  248.77    5.39
  -3   3   6  235.46    7.26
   3   3  -6  253.48    7.05
  -3  -3   6  238.73    6.92
  -3  -3   6  233.49    6.38
  -3   3   6  230.33    6.78
   3   3  -6  238.92    6.41
  -3   3   6  249.47    5.26
   3   3  -5   29.85    2.18
  -3  -3   5   30.38    2.31
  -3   3   5   31.58    1.72
  -3   3   5   27.07    2.30
  -3  -3   5   27.95    2.17
   3   3  -5   29.05    2.10
   3   3  -5   31.36    2.00
  -3  -3   5   31.04    2.24
  -3   3   5   29.61    1.42
  -3  -3   4 1417.94   22.61
   3  -3  -4 1431.60   19.73
  -3  -3   4 1430.46   23.19
   3   3  -4 1440.99   23.01
  -3   3   4 1386.24   21.39
  -3   3   4 1461.48   23.44
   3   3  -4 1379.34   22.64
  -3  -3   4 1415.33   22.90
   3   3  -4 1365.50   21.88
  -3   3   4 1398.80   20.10
   3   3  -3   66.69    3.10
  -3  -3   3   65.36    3.16
  -3   3   3   71.18    2.82
  -3  -3   3   71.79    3.24
   3   3  -3   70.23    3.11
   3  -3  -3   69.62    1.93
  -3  -3   3   69.46    2.93
  -3   3   3   69.67    2.05
  -3   3   2 2909.03   40.61
   3   3  -2 2846.60   41.04
  -3  -3   2 2890.95   41.11
   3   3  -2 2878.50   40.83
  -3   3   2 2927.89   38.66
  -3  -3   2 2851.34   39.99
   3  -3  -2 2796.27   38.55
  -3   3   1 2401.40   34.94
   3   3  -1 2405.74   35.36
   3  -3  -1 2239.87   34.99
  -3   3   1 2377.05   34.43
  -3  -3   1 2404.01   34.70
   3   3  -1 2351.74   34.44
  -3   3   1 2350.45   33.17
   3   3  -1 2351.14   33.31
  -3  -3   1 2380.95   33.55
   3  -3  -1 2424.51   33.31
   3  -3   0  358.06    7.36
  -3  -3   0  363.86    7.62
   3   3   0  369.05    7.54
  -3   3   0  361.24    8.26
  -3  -3   0  368.54    6.86
   3   3   0  362.91    6.63
   3  -3   0  366.47    8.52
  -3   3   0  365.58    7.33
   3  -3   0  376.12    7.83
   3   3   1  143.23    3.33
   3   3   1  140.09    3.87
  -3  -3  -1  136.91    3.94
   3  -3   1  143.53    4.97
  -3   3  -1  142.59    3.83
   3  -3   1  141.68    4.07
   3  -3   1  136.59    4.36
  -3   3  -1  142.24    4.27
  -3  -3  -1  139.96    3.45
   3   3   2    1.39    0.46
  -3  -3  -2    1.08    0.45
   3  -3   2    0.16    0.70
  -3   3  -2    0.95    0.56
   3   3   2    0.93    0.74
   3  -3   2    1.37    0.49
  -3   3  -2    2.17    0.64
  -3   3  -2    1.01    0.72
  -3  -3  -2    0.93    0.39
  -3  -3  -3   42.60    1.78
  -3   3  -3   43.96    2.76
   3  -3   3   41.29    2.75
   3   3   3   46.88    3.04
  -3  -3  -3   46.30    1.85
   3  -3   3   38.37    2.09
  -3   3  -3   38.88    2.03
  -3   3  -3   39.37    2.29
   3  -3   3   39.33    2.32
   3   3   3   45.59    1.79
  -3  -3  -4   32.83    1.40
  -3   3  -4   36.73    2.60
   3  -3   4   34.65    2.59
   3   3   4   31.36    2.54
  -3   3  -4   37.13    2.06
   3  -3   4   33.77    2.05
  -3   3  -4   34.14    2.21
   3  -3   4   26.35    1.97
   3   3   4   34.34    1.72
   3   3   5   51.84    2.39
  -3   3  -5   49.25    3.11
  -3  -3  -5   47.57    1.55
   3  -3   5   53.28    3.31
  -3  -3  -5   45.83    3.57
   3   3   5   46.96    3.24
   3  -3   5   52.22    2.73
  -3   3  -5   50.17    2.63
   3  -3   5   54.58    3.00
  -3   3  -5   54.42    2.97
  -3   3  -6  445.82   10.86
   3  -3   6  444.10   11.14
  -3  -3  -6  432.60   12.30
   3   3   6  466.87   11.50
   3   3   6  463.81    9.42
   3  -3   6  433.72    9.83
  -3   3  -6  442.84    9.84
   3  -3   6  456.96   10.41
  -3   3  -6  444.21   10.33
  -3   3  -7  747.48   15.61
   3  -3   7  764.98   16.15
   3   3   7  768.38   14.31
  -3  -3  -7  758.47   17.49
   3  -3   7  761.03   14.81
  -3   3  -7  735.54   14.90
   3  -3   7  768.03   15.21
   3   3   7  769.75   16.39
  -3   3  -7  771.98   15.48
  -3   3  -8  140.33    5.70
   3  -3   8  132.01    5.85
   3   3   8  134.91    5.04
  -3  -3  -8  138.55    6.82
  -3   3  -8  137.21    5.50
   3  -3   8  136.04    5.31
   3  -3   8  131.37    5.47
   3   3   8  138.24    6.01
   3   3   8  141.80    6.10
  -3   3  -8  142.10    5.77
   3   3   9   14.81    1.75
  -3   3  -9   14.13    1.86
   3  -3   9   15.06    2.04
   3   3   9   16.11    2.18
  -3  -3  -9   14.17    2.39
   3  -3   9   15.80    1.96
  -3   3  -9   16.61    2.09
   3   3   9   14.51    2.09
  -3   3  -9   13.60    1.93
   3  -3   9   14.94    1.92
   3   3  10    2.86    1.04
  -3   3 -10    0.49    0.90
   3  -3  10    2.09    1.03
  -3  -3 -10    3.21    1.51
   3   3  10    2.51    1.18
   3  -3  10    3.40    1.09
   3   3  10    1.92    1.29
  -3   3 -10    0.66    0.95
  -3   3 -10    2.31    1.13
   3  -3  10    2.98    1.05
  -3   3 -11   52.03    3.67
   3  -3  11   48.83    3.80
  -3  -3 -11   54.44    4.78
   3   3  11   55.08    3.76
   3  -3  11   54.33    3.97
  -3   3 -11   53.14    4.13
  -3   3 -11   52.46    4.00
   3   3  12   19.80    2.41
   3  -3  12   20.68    2.57
  -3   3 -12   19.02    2.29
  -3  -3 -12   15.43    2.73
  -3   3 -12   20.45    2.72
  -3   3 -12   18.87    2.57
   3   3  13   -0.07    0.90
   3  -3  13    2.77    1.37
  -3   3 -13    1.74    1.09
  -3  -3 -13   -1.46    1.76
  -3   3 -13    0.72    1.26
  -3   3 -13    4.81    1.66
   3   3  14   11.62    2.15
   3  -3  14    9.90    2.09
  -3   3 -14    8.88    1.83
  -3  -3 -14    8.93    2.45
  -3   3 -14   13.50    2.37
  -3   3 -14    6.92    1.76
   3  -3  15  110.82    6.33
  -3   3 -15  101.12    5.48
   3   3  15  113.04    6.46
  -3  -3 -15  104.80    7.66
  -3   3 -15  115.03    6.90
  -3   3 -15  117.06    7.01
   3   3  16   53.00    4.71
  -3  -3 -16   50.20    5.72
  -3   3 -16   57.56    5.30
  -3   3 -16   44.71    4.56
   3  -3  16   49.76    4.32
  -3   3 -17    1.13    1.69
  -3  -3 -17    2.60    2.19
   3   3  17    2.10    1.60
  -3   3 -17    3.23    1.76
   3  -3  17    1.79    1.15
  -3   3 -18    2.04    1.68
   3   3  18   -1.74    1.54
  -3   3 -18   -0.70    1.41
  -3  -3 -19    5.54    2.81
  -3   3 -19    8.42    2.70
   3   3  19    6.16    1.74
  -3   3 -19    4.63    2.04
  -3   3 -20    7.01    2.64
  -3  -3 -20    6.57    2.84
   3   3  20    9.16    2.93
  -3   3 -20    9.68    2.92
  -3  -3 -21    8.25    3.20
  -3   3 -21    9.70    3.15
   3  -3  21   11.33    3.57
  -3   3 -21    9.11    3.13
   3   3  21    9.00    2.87
   3  -5 -21  147.61   10.78
   3   5 -21  129.74    8.93
   3   5 -21  150.22    9.98
  -3  -5  21  128.51    8.38
   3  -5 -20   33.15    5.61
   3   5 -20   37.66    4.82
   3   5 -20   31.70    4.71
  -3  -5  20   30.58    4.12
  -3   5  19   22.34    3.06
   3  -5 -19   24.94    4.72
   3   5 -19   27.83    3.88
   3   5 -19   27.43    4.19
  -3  -5  19   27.00    3.74
  -3  -5  18   41.43    4.51
   3   5 -18   33.05    4.84
   3   5 -18   47.21    4.85
   3  -5 -18   42.73    5.36
  -3  -5  17   32.93    3.94
   3  -5 -17   30.63    4.52
   3   5 -17   31.80    4.14
   3   5 -17   30.58    3.81
   3  -5 -16   10.79    2.85
   3   5 -16   13.69    2.56
   3   5 -16   10.43    2.54
  -3  -5  16    9.12    2.19
  -3  -5  15  222.21    9.73
   3  -5 -15  226.12   11.23
  -3   5  15  211.99    7.60
   3   5 -15  220.05   10.09
   3   5 -15  209.91    9.09
   3  -5 -14   44.04    4.61
  -3   5  14   40.19    3.00
   3   5 -14   48.66    4.39
  -3  -5  14   49.61    4.46
   3   5 -14   41.89    4.00
   3  -5 -13 1436.18   30.99
   3   5 -13 1470.64   28.74
  -3  -5  13 1361.13   28.53
   3   5 -13 1395.61   27.66
  -3   5  13 1426.76   24.27
  -3  -5  12    1.56    1.13
  -3   5  12    2.09    0.93
   3   5 -12    3.74    1.57
   3   5 -12    2.38    1.14
  -3  -5  11   14.34    2.31
   3   5 -11   16.00    2.15
  -3   5  11   18.91    2.70
  -3   5  11   16.63    1.62
   3   5 -11   17.45    2.39
  -3  -5  11   16.50    2.31
   3   5 -11   16.53    2.25
  -3   5  10   44.95    1.61
  -3  -5  10   41.15    3.74
   3   5 -10   37.88    3.35
  -3   5  10   45.12    3.84
  -3   5  10   42.49    2.24
   3   5 -10   48.24    3.74
  -3   5  10   41.21    3.63
   3   5 -10   38.72    3.18
   3   5  -9   29.39    2.87
  -3   5   9   27.82    1.52
  -3  -5   9   32.68    3.18
  -3   5   9   29.20    3.05
  -3   5   9   26.24    1.60
  -3  -5   9   28.76    2.85
   3   5  -9   30.01    2.93
  -3   5   9   24.51    2.72
   3   5  -9   27.52    2.64
  -3   5   8   69.10    4.81
  -3  -5   8   84.33    5.00
   3   5  -8   83.96    4.72
  -3   5   8   81.28    2.94
   3   5  -8   88.75    4.78
  -3  -5   8   86.71    4.89
   3   5  -8   78.02    4.34
  -3   5   8   75.81    2.51
   3   5  -7    2.58    1.04
  -3   5   7    2.48    0.72
  -3  -5   7    4.48    1.42
  -3   5   7    1.43    0.96
  -3  -5   7    3.33    1.15
   3   5  -7    4.08    1.32
   3   5  -7    3.14    1.16
  -3   5   7    2.33    0.44
  -3  -5   6   54.97    3.65
  -3   5   6   63.29    4.24
   3   5  -6   63.61    3.77
   3   5  -6   57.18    3.48
   3   5  -6   57.45    3.73
  -3  -5   6   61.55    4.05
  -3   5   6   64.13    2.91
   3   5  -5  773.35   16.32
  -3   5   5  764.95   14.32
  -3  -5   5  786.43   16.96
  -3  -5   5  812.14   16.80
  -3   5   5  774.91   17.36
   3   5  -5  777.87   16.03
   3   5  -5  791.91   15.66
  -3  -5   5  800.39   15.89
   3   5  -4  674.89   14.31
  -3  -5   4  693.20   13.79
  -3  -5   4  677.40   14.96
   3   5  -4  678.75   14.53
  -3   5   4  655.05   13.10
  -3  -5   4  676.32   15.01
  -3   5   3   24.84    2.04
   3   5  -3   27.82    2.41
  -3  -5   3   27.40    2.52
  -3  -5   3   29.03    2.16
   3  -5  -3   27.49    1.23
   3  -5  -3   26.29    2.31
  -3  -5   3   31.76    2.84
   3   5  -3   30.49    2.61
   3   5  -2   46.43    2.94
  -3  -5   2   44.98    3.09
  -3   5   2   43.89    2.83
   3  -5  -2   41.85    2.96
  -3  -5   2   48.00    3.54
   3   5  -2   45.48    3.22
  -3   5   2   40.69    3.03
  -3  -5   2   46.05    2.49
   3  -5  -2   41.80    1.88
   3   5  -1   99.30    4.72
   3  -5  -1  105.65    4.77
  -3   5   1  106.77    4.50
  -3  -5   1  109.20    5.42
  -3   5   1  111.58    4.71
   3   5  -1   98.41    4.24
  -3  -5   1   94.66    4.39
  -3  -5   1  100.17    3.56
   3  -5  -1  108.62    3.52
   3  -5   0   39.73    3.07
   3   5   0   45.88    3.34
  -3   5   0   39.64    2.59
  -3  -5   0   44.34    2.84
   3   5   0   45.33    2.71
  -3   5   0   37.26    2.80
  -3  -5   0   41.15    2.03
   3  -5   0   36.50    2.35
  -3   5  -1  138.71    4.90
   3   5   1  136.65    6.03
   3  -5   1  141.26    5.51
   3  -5   1  135.67    5.77
   3  -5   1  131.50    4.83
   3   5   1  135.36    4.72
  -3   5  -1  138.97    5.68
  -3  -5  -1  134.91    4.95
  -3  -5  -1  133.55    3.66
   3   5   2   66.46    3.04
  -3  -5  -2   64.34    3.25
  -3   5  -2   65.23    3.89
   3  -5   2   66.34    3.61
   3  -5   2   65.84    4.13
   3   5   2   73.09    4.49
  -3   5  -2   68.83    3.31
  -3   5  -2   67.17    3.62
  -3  -5  -2   63.43    2.24
   3   5   3  307.58    5.32
   3   5   3  306.28    7.09
  -3  -5  -3  303.81    7.49
  -3   5  -3  319.10    9.40
   3  -5   3  314.79    8.42
   3   5   3  293.47    9.82
  -3   5  -3  330.98    7.99
  -3   5  -3  325.83    8.62
  -3  -5  -3  323.11    5.75
  -3   5  -4    2.72    1.07
   3   5   4    1.42    0.66
  -3  -5  -4    1.91    0.81
   3  -5   4    2.52    1.08
   3   5   4    0.84    1.09
   3  -5   4    2.18    0.92
  -3   5  -4    2.76    1.03
  -3   5  -4    0.91    0.74
   3   5   4    1.54    0.36
  -3  -5  -5   46.01    2.34
  -3   5  -5   42.80    3.34
   3  -5   5   49.41    3.16
   3  -5   5   45.70    3.62
   3   5   5   45.14    3.85
  -3   5  -5   44.55    2.87
  -3   5  -5   40.83    3.02
   3   5   5   45.87    1.67
  -3   5  -6    1.93    0.81
  -3  -5  -6    1.91    0.54
   3  -5   6    3.16    1.44
   3   5   6    2.28    1.22
   3  -5   6    3.40    0.96
  -3   5  -6    1.65    0.77
  -3   5  -6    3.14    1.04
   3   5   6    1.06    0.43
   3   5   7   79.52    2.87
  -3  -5  -7   80.25    2.63
  -3   5  -7   77.03    4.71
   3  -5   7   77.15    4.94
   3   5   7   74.52    5.00
  -3   5  -7   78.85    4.10
   3  -5   7   76.91    4.15
   3  -5   7   78.72    4.46
  -3   5  -7   71.13    4.20
   3   5   8  320.60    7.22
  -3   5  -8  299.63    9.92
   3  -5   8  297.36   10.44
   3   5   8  291.67   10.50
  -3  -5  -8  315.58   11.46
  -3   5  -8  300.10    9.05
   3  -5   8  305.21    9.18
   3  -5   8  298.06    9.42
  -3   5  -8  307.91    9.48
   3   5   9    4.40    0.91
  -3   5  -9    4.35    1.31
   3  -5   9    5.12    1.61
  -3  -5  -9    5.48    1.95
   3   5   9    4.43    1.45
   3  -5   9    4.34    1.30
  -3   5  -9    1.97    1.01
  -3   5  -9    4.85    1.45
   3   5  10    9.54    1.33
  -3   5 -10    7.82    1.67
   3  -5  10   12.95    2.26
  -3  -5 -10    8.57    2.46
   3  -5  10    7.94    1.65
  -3   5 -10   10.14    1.78
  -3   5 -10   11.04    2.13
   3  -5  11 2689.78   47.18
  -3  -5 -11 2685.93   49.89
  -3   5 -11 2690.08   45.37
  -3   5 -11 2764.08   45.96
   3   5  12   61.99    3.76
  -3  -5 -12   58.57    5.54
   3  -5  12   69.17    5.22
  -3   5 -12   68.49    4.82
  -3   5 -12   68.90    4.91
  -3  -5 -13  265.49   12.47
   3   5  13  269.15    8.81
   3  -5  13  260.31   10.62
  -3   5 -13  268.80   10.23
  -3   5 -13  260.92   10.33
  -3   5 -14   14.26    2.73
  -3  -5 -14   15.33    3.19
   3  -5  14   16.63    2.71
  -3   5 -14   14.22    2.68
   3   5  14   16.39    2.26
  -3  -5 -15  482.01   18.05
   3   5  15  454.67   13.08
   3  -5  15  467.06   15.30
  -3   5 -15  461.77   15.02
  -3   5 -15  460.23   15.17
   3   5  16   74.13    5.13
  -3  -5 -16   69.32    6.90
   3  -5  16   77.28    5.98
  -3   5 -16   77.89    6.26
  -3   5 -16   76.87    6.08
   3   5  17   65.09    4.98
  -3  -5 -17   66.80    7.32
   3  -5  17   70.18    5.95
  -3   5 -17   63.87    5.77
  -3   5 -17   73.92    6.25
  -3   5 -18   -1.35    2.16
  -3  -5 -18    1.82    2.78
   3  -5  18   -0.42    1.35
  -3   5 -18   -3.15    2.16
   3   5  18    0.22    1.19
  -3  -5 -19   80.73    8.23
   3  -5  19   66.57    5.99
  -3   5 -19   79.18    7.10
  -3   5 -19   73.47    6.57
  -3  -5 -20   57.35    7.22
  -3   5 -20   53.97    5.80
  -3   5 -20   62.95    6.52
   3   7 -20   34.77    5.08
   3   7 -20   36.98    5.00
  -3  -7  20   32.89    4.67
   3   7 -19    0.00    2.12
   3   7 -19    3.00    2.00
  -3  -7  19    5.06    1.90
   3   7 -18    0.85    1.58
   3   7 -18    2.42    1.85
  -3  -7  18    2.19    1.55
   3   7 -17   19.62    3.59
   3   7 -17   18.03    3.20
  -3  -7  17   26.91    3.97
   3   7 -16    5.32    2.30
   3   7 -16    5.03    1.89
  -3  -7  16    6.31    2.21
   3   7 -15    6.12    2.09
   3   7 -15    4.33    1.84
  -3  -7  15    7.48    2.23
   3   7 -14    5.69    2.16
  -3  -7  14    6.46    2.21
   3   7 -14    7.28    2.18
  -3   7  14    6.30    1.09
  -3  -7  13  137.78    8.08
  -3   7  13  108.04    3.56
   3   7 -13  137.25    7.46
   3   7 -13  133.76    7.04
   3   7 -12    6.05    1.80
   3   7 -12    4.55    1.63
  -3   7  12    3.90    0.61
  -3   7  12    2.40    0.46
  -3  -7  12    3.87    1.58
   3   7 -11  101.51    6.04
  -3   7  11   94.99    2.89
  -3  -7  11   95.64    6.50
   3   7 -11   93.39    5.58
   3   7 -10  156.87    7.10
  -3  -7  10  165.31    8.43
  -3   7  10  145.50    4.35
   3   7 -10  146.01    7.16
  -3   7   9    6.36    1.03
  -3  -7   9    4.45    1.65
   3   7  -9    5.73    1.58
   3   7  -9    8.81    1.88
  -3  -7   8    2.15    1.05
  -3   7   8    2.23    0.78
   3   7  -8    2.23    1.46
   3   7  -8    0.73    0.97
  -3  -7   8    3.85    1.31
  -3   7   7   -0.51    0.72
  -3  -7   7    1.73    1.33
  -3   7   7    1.60    1.19
   3   7  -7   -0.17    0.89
   3   7  -7   -0.51    0.88
  -3  -7   7   -1.39    1.01
  -3   7   6    0.32    0.58
  -3  -7   6    0.96    1.05
  -3  -7   6    1.61    1.28
  -3   7   6   -1.34    0.97
   3   7  -6    0.35    0.99
   3   7  -6    1.68    1.12
  -3  -7   6    0.74    0.77
  -3  -7   5   35.00    3.50
   3   7  -5   35.39    3.29
  -3   7   5   31.67    2.58
  -3  -7   5   36.83    3.58
   3   7  -5   39.19    3.36
   3   7  -5   36.91    3.12
  -3  -7   5   35.24    2.95
   3   7  -4  151.83    6.59
   3  -7  -4  151.22    6.45
  -3  -7   4  152.26    7.49
  -3   7   4  159.44    7.46
  -3  -7   4  164.82    6.16
   3   7  -4  151.26    6.70
  -3  -7   4  157.60    7.30
  -3   7   4  155.59    6.01
  -3   7   3   19.87    2.17
   3   7  -3   19.46    2.31
  -3  -7   3   16.95    2.36
   3   7  -3   19.20    2.38
  -3  -7   3   16.57    1.85
   3  -7  -3   19.71    1.15
  -3   7   3   24.05    2.72
   3  -7  -3   18.04    2.28
  -3  -7   3   17.21    2.64
  -3   7   2  234.82    7.90
  -3  -7   2  224.11    8.48
   3   7  -2  232.42    8.11
  -3   7   2  240.69    8.56
   3  -7  -2  226.94    8.37
   3   7  -2  233.68    8.39
  -3  -7   2  241.49    9.73
  -3  -7   2  235.37    6.80
   3  -7  -2  233.39    5.64
   3   7  -1  515.86   13.80
  -3   7   1  549.38   13.45
   3  -7  -1  546.31   14.07
  -3  -7   1  556.78   11.27
   3   7  -1  539.86   13.21
  -3  -7   1  547.35   13.87
  -3   7   1  526.79   13.29
   3  -7  -1  538.02   10.85
   3  -7   0   32.32    3.31
   3   7   0   40.76    3.59
  -3   7   0   37.31    3.05
  -3  -7   0   36.82    2.18
  -3   7   0   31.98    3.00
   3   7   0   39.68    3.01
  -3  -7   0   37.89    3.21
   3  -7   0   34.56    2.42
   3   7   1   95.38    5.56
   3  -7   1   93.12    5.49
   3  -7   1  101.02    5.71
  -3   7  -1   97.30    4.81
   3  -7   1   95.28    4.41
  -3  -7  -1   98.48    3.39
   3   7   1   90.89    4.49
  -3   7  -1   89.58    5.09
  -3  -7  -1   96.67    5.03
   3  -7   2   20.25    2.60
   3  -7   2   15.58    2.47
   3   7   2   17.14    2.74
   3  -7   2   15.86    1.97
  -3   7  -2   14.83    1.92
   3   7   2   15.31    1.80
  -3   7  -2   16.83    2.27
  -3  -7  -2   14.28    1.84
  -3  -7  -2   14.75    1.15
  -3  -7  -3  239.18    7.66
  -3   7  -3  209.13    8.35
   3   7   3  229.34    6.93
   3   7   3  245.77    9.81
   3  -7   3  215.39    8.92
   3  -7   3  221.11    8.37
  -3   7  -3  227.33    7.45
  -3   7  -3  222.03    7.95
  -3  -7  -3  214.59    4.37
   3  -7   4   43.56    3.54
   3   7   4   31.55    3.57
   3  -7   4   36.48    3.76
   3   7   4   27.61    3.49
  -3   7  -4   34.65    2.84
  -3   7  -4   37.93    3.20
  -3   7  -4   38.01    3.59
   3   7   4   32.24    2.37
  -3  -7  -4   35.29    2.80
  -3   7  -5   28.66    2.63
   3  -7   5   31.17    3.55
   3  -7   5   27.52    2.86
  -3   7  -5   24.85    2.76
   3   7   5   25.72    2.00
  -3  -7  -5   25.11    2.25
  -3   7  -6  118.11    5.47
   3  -7   6  114.64    6.80
   3  -7   6  112.03    5.80
  -3   7  -6  112.50    5.82
  -3  -7  -6  124.17    4.86
  -3   7  -7   45.15    3.75
   3  -7   7   40.55    3.57
  -3  -7  -7   37.03    2.48
   3  -7   7   40.14    4.13
  -3   7  -7   43.41    3.38
  -3   7  -8  117.87    6.18
   3  -7   8  119.40    7.18
  -3  -7  -8  117.27    4.24
   3  -7   8  109.95    6.01
  -3   7  -8  111.06    5.72
  -3   7  -9   -0.12    1.13
  -3   7  -9   -0.28    1.13
   3  -7   9   -0.26    1.19
   3  -7  10   56.27    5.14
   3   7  10   41.08    1.52
  -3   7 -10   43.20    3.77
  -3   7 -10   52.60    4.41
   3   7  10   39.05    1.58
   3  -7  11  205.39    9.95
   3   7  11  191.47    4.59
  -3   7 -11  193.64    8.36
  -3   7 -11  205.95    8.91
   3   7  11  178.11    4.60
  -3   7 -12    6.06    1.88
   3   7  12    9.13    1.09
  -3   7 -12    8.50    2.22
   3  -7  12   11.78    2.38
   3   7  12    7.56    1.05
   3  -7  13    6.76    2.22
  -3   7 -13    5.22    2.18
   3   7  13    6.43    1.08
  -3   7 -13    5.73    1.99
   3  -7  14   53.28    5.37
  -3   7 -14   40.55    4.37
   3   7  14   41.85    2.83
  -3   7 -14   47.50    4.69
   3  -7  15    5.00    1.72
  -3   7 -15    4.82    1.84
  -3   7 -15    5.43    1.85
   3  -7  16    2.93    1.73
  -3   7 -16   -0.48    2.04
  -3   7 -16   -1.05    1.68
   3  -7  17    5.81    2.08
  -3   7 -17    5.63    2.24
  -3   7 -17    7.90    2.58
   3  -7  18    4.85    2.39
  -3   7 -18    2.46    2.41
  -3   7 -18    2.69    1.79
   3  -7  19   52.15    5.90
  -3   7 -19   62.03    6.33
  -3   7 -19   59.55    6.24
  -3  -9  18   10.61    3.19
   3   9 -18   12.47    3.06
   3   9 -18   10.65    2.93
  -3  -9  17   -1.57    1.79
   3   9 -17   -0.70    1.54
   3   9 -17    0.00    1.97
  -3  -9  16    3.49    2.10
   3   9 -16   -1.23    1.85
   3   9 -16   -1.20    1.46
  -3  -9  15    1.15    1.56
   3   9 -15    1.96    1.56
   3   9 -15    5.70    2.14
   3   9 -14  100.39    7.30
   3   9 -14  107.60    7.13
   3   9 -13    7.74    2.10
  -3  -9  13    8.72    2.69
   3   9 -13    9.01    2.64
   3   9 -12    1.97    1.83
  -3  -9  12    3.41    2.02
   3   9 -12    1.51    1.51
   3   9 -11   -0.23    1.37
   3   9 -11    1.20    1.28
   3   9 -10   87.39    6.09
  -3   9  10   77.49    3.79
  -3  -9  10   89.73    6.94
   3   9 -10   81.47    5.68
   3   9  -9  260.06   10.36
  -3   9   9  242.53    7.60
  -3  -9   9  272.88   12.00
   3   9  -9  248.16   10.08
   3   9  -8   79.60    5.53
   3   9  -8   89.04    5.81
  -3   9   8   75.14    4.20
  -3  -9   8   86.23    6.62
   3   9  -7   18.50    2.83
  -3   9   7   15.96    2.00
   3   9  -7   16.03    2.65
  -3  -9   7   15.08    2.71
  -3   9   6   60.47    5.31
  -3  -9   6   53.83    4.99
  -3   9   6   43.60    3.44
   3   9  -6   51.34    4.37
   3   9  -6   48.77    4.15
  -3  -9   6   45.11    3.79
  -3   9   5  314.47   12.06
  -3   9   5  282.20    9.27
  -3  -9   5  283.18   11.57
   3   9  -5  290.15   10.48
   3   9  -5  285.57   10.27
  -3  -9   5  280.90    9.43
   3   9  -4  172.80    7.95
   3  -9  -4  187.02    8.21
  -3   9   4  197.38    9.09
  -3  -9   4  173.07    6.89
  -3  -9   4  173.15    8.67
  -3   9   4  167.62    7.11
  -3   9   3    8.01    1.71
   3   9  -3    4.04    1.49
   3  -9  -3    6.34    0.61
  -3  -9   3    5.91    1.32
   3  -9  -3    7.23    0.73
   3  -9  -3    8.53    2.00
  -3  -9   3    5.45    1.74
  -3   9   3    6.52    1.89
  -3  -9   2   63.03    4.99
  -3   9   2   54.29    4.14
   3  -9  -2   57.20    4.82
   3   9  -2   67.57    4.92
  -3   9   2   63.83    4.74
   3  -9  -2   61.55    2.53
  -3  -9   2   67.51    3.74
   3  -9  -2   65.90    2.92
   3  -9  -1   30.66    3.65
  -3   9   1   28.88    3.16
   3  -9  -1   30.78    2.36
   3   9  -1   27.47    3.33
  -3  -9   1   31.86    2.43
  -3  -9   1   32.30    3.52
  -3   9   0   -2.01    1.43
   3   9   0   -1.11    1.23
  -3  -9   0    0.30    1.07
   3  -9   0    0.76    1.18
  -3  -9   0    0.32    0.62
   3  -9   0    0.92    0.96
   3   9   1    9.78    1.83
   3   9   1   12.68    2.44
   3  -9   1   11.62    2.39
  -3  -9  -1    9.35    1.94
  -3   9  -1   12.52    2.11
  -3  -9  -1    9.52    1.23
   3  -9   1   11.94    1.80
   3  -9   2   37.45    4.04
   3   9   2   43.23    4.34
   3  -9   2   37.71    3.18
  -3   9  -2   36.08    3.31
   3   9   2   36.60    3.17
  -3  -9  -2   37.75    3.58
  -3  -9  -2   33.93    1.87
   3   9   3   -0.45    1.49
  -3  -9  -3    1.30    1.24
   3  -9   3    1.63    1.49
   3  -9   3    1.59    0.89
  -3   9  -3    4.28    1.69
  -3   9  -3    2.02    1.64
   3   9   3   -0.09    0.75
  -3  -9  -4    2.63    1.35
   3  -9   4    0.98    1.43
   3   9   4    2.00    1.73
   3  -9   4    2.41    1.30
  -3   9  -4    6.37    1.75
  -3   9  -4    6.59    1.82
   3   9   4    2.89    0.98
  -3   9  -5    1.48    0.94
  -3  -9  -5    2.29    1.25
   3   9   5    2.10    1.81
   3  -9   5    3.53    1.83
  -3   9  -5    0.56    1.07
   3   9   5    4.40    1.17
  -3   9  -6    5.03    1.44
  -3  -9  -6   10.02    1.82
   3  -9   6    3.25    1.58
   3   9   6   11.77    2.75
   3   9   6    7.27    1.30
  -3   9  -6    3.98    1.45
  -3   9  -7  248.49    9.25
   3  -9   7  263.49   11.81
  -3  -9  -7  244.25    8.27
  -3   9  -8   75.65    5.44
  -3   9  -8   67.18    4.82
  -3  -9  -8   65.25    3.92
   3  -9   8   72.51    6.37
  -3   9  -9    2.32    1.41
   3  -9   9   -1.15    1.85
  -3   9  -9   -1.39    1.14
  -3   9 -10   -0.68    1.21
   3  -9  10    0.37    1.63
  -3   9 -10    2.10    1.27
  -3   9 -11  329.63   12.06
  -3   9 -11  343.17   12.81
   3  -9  11  331.18   14.39
   3  -9  12    5.74    2.38
  -3   9 -12    3.40    1.86
  -3   9 -12    3.98    1.75
   3  -9  13    2.75    1.80
  -3   9 -13   -1.23    1.84
  -3   9 -13    3.57    1.83
   3  -9  14   11.94    3.14
  -3   9 -14    6.93    2.14
  -3   9 -14    8.75    2.58
  -3   9 -15  143.12    8.76
  -3   9 -15  150.61    9.26
   3  -9  15  151.50   10.14
   3  -9  16   55.11    6.40
  -3   9 -16   65.43    6.39
  -3   9 -16   63.68    6.16
   3  -9  17   13.89    3.28
  -3   9 -17   17.67    3.64
  -3   9 -17   20.14    3.70
   3  11 -15    0.92    1.71
   3  11 -15    2.09    1.81
   3  11 -14    2.15    2.00
   3  11 -14    4.85    1.77
  -3 -11  14    1.59    2.25
   3  11 -13   96.13    7.38
  -3 -11  13  111.40    9.16
   3  11 -13  102.59    7.32
   3  11 -12   25.28    3.83
  -3 -11  12   29.33    4.70
   3  11 -12   16.99    3.20
   3  11 -11    9.49    2.54
  -3 -11  11    9.77    3.32
   3  11 -11    5.18    2.13
   3  11 -10    2.62    1.83
  -3  11  10    0.65    2.05
   3  11 -10    0.27    1.49
   3  11  -9  179.74    9.26
   3  11  -9  164.52    8.89
  -3  11   9  193.28   11.26
   3  11  -8   -0.53    1.42
  -3 -11   8    1.16    1.75
  -3  11   8    0.65    1.63
   3  11  -8    4.89    1.99
   3  11  -7   11.64    2.51
   3  11  -7   13.82    2.88
  -3 -11   7    9.85    3.07
  -3  11   7   13.93    2.88
   3  11  -6   70.66    5.56
   3  11  -6   66.83    5.45
  -3 -11   6   70.59    6.42
   3  11  -5    6.50    2.04
   3  11  -5    4.13    1.79
  -3  11   5    1.47    1.62
  -3 -11   5    4.75    2.05
   3  11  -4   55.79    4.97
  -3 -11   4   61.23    5.85
  -3  11   4   67.12    5.73
   3 -11  -4   58.38    5.20
  -3 -11   4   50.76    3.91
   3  11  -3    1.34    1.70
   3 -11  -3    1.85    1.41
  -3 -11   3   -0.36    2.02
  -3  11   3   -0.90    1.50
   3 -11  -2   79.55    6.14
  -3  11   2   84.45    6.01
   3  11  -2   79.04    5.82
  -3 -11   2   76.02    6.21
   3 -11  -2   70.87    2.99
   3 -11  -2   59.20    2.54
  -3 -11   2   63.47    4.00
  -3  11   1   13.87    2.49
   3  11  -1   13.00    2.64
   3 -11  -1   12.33    2.90
   3 -11  -1   11.47    1.51
   3 -11  -1   12.02    1.43
  -3 -11   1   10.69    1.60
   3  11   0    1.47    1.37
  -3  11   0   -0.44    1.27
   3 -11   0    3.89    2.06
  -3 -11   0    0.63    1.38
   3 -11   0   -0.60    1.17
  -3 -11   0    1.53    0.85
   3 -11   0    0.46    0.73
  -3  11  -1    3.01    1.61
   3  11   1    3.28    1.85
   3 -11   1    4.05    2.07
  -3 -11  -1    2.10    1.45
   3 -11   1    3.49    1.44
  -3 -11  -1    2.47    0.87
   3 -11   1    1.58    0.97
  -3 -11  -2    1.18    0.45
  -3 -11  -2    0.26    0.41
   3 -11   2    2.78    1.35
   3  11   2   -2.68    2.04
  -3 -11  -2    1.30    1.48
   3 -11   2    1.96    1.70
  -3  11  -2    2.08    1.35
  -3  11  -2    2.44    1.55
   3 -11   2    1.65    0.95
   3 -11   3  150.67    9.35
   3  11   3  160.30    9.29
   3 -11   3  162.56    7.56
  -3  11  -3  153.76    7.75
  -3  11  -3  173.17    8.63
  -3 -11  -3  146.51    8.08
   3 -11   4   23.48    3.80
   3  11   4   18.19    3.35
  -3 -11  -4   20.34    3.10
  -3  11  -4   25.15    3.20
  -3  11  -4   18.34    2.83
   3 -11   4   18.38    2.98
  -3  11  -5    5.35    1.74
   3 -11   5    2.88    1.76
  -3  11  -5    6.06    2.06
  -3 -11  -5    4.43    1.51
   3  11   5    3.52    2.24
   3 -11   5    2.95    1.88
  -3  11  -6   24.22    3.25
   3 -11   6   17.89    2.91
  -3 -11  -6   23.36    3.07
   3 -11   6   28.30    4.49
   3  11   6   31.67    4.55
  -3  11  -6   26.62    3.54
  -3  11  -7  282.11   11.06
   3 -11   7  300.87   12.45
  -3  11  -7  286.42   11.72
   3  11   7  332.76   14.96
   3 -11   7  295.94   13.96
  -3 -11  -7  289.39   10.66
  -3  11  -8    9.82    2.34
   3 -11   8   10.06    2.74
   3  11   8   12.94    3.42
   3 -11   8    7.47    2.49
  -3 -11  -8    8.08    1.86
  -3  11  -8   13.81    2.85
  -3  11  -9    9.21    2.13
   3 -11   9    8.71    2.55
   3  11   9    7.41    2.91
   3 -11   9   10.47    3.32
  -3  11  -9    9.60    2.44
  -3  11 -10   11.36    2.52
   3 -11  10   15.53    3.52
   3  11  10   15.82    3.91
   3 -11  10   11.77    3.49
  -3  11 -10   13.17    2.89
  -3  11 -11    3.11    1.77
   3 -11  11    5.57    2.29
  -3  11 -11    2.22    1.61
   3 -11  11    2.64    1.99
   3 -11  12    7.91    2.82
  -3  11 -12    9.64    2.72
  -3  11 -12    6.79    2.45
   3 -11  12    8.66    3.12
   3 -11  13    5.19    2.72
  -3  11 -13    4.59    1.93
  -3  11 -13    5.64    2.38
   3 -11  13    7.32    3.19
   3 -11  14    2.87    2.59
  -3  11 -14   -1.00    1.59
  -3  11 -14    0.54    1.67
   3  13 -11    6.97    2.71
  -3 -13  11    8.46    2.55
  -3  13  11    7.82    3.22
   3  13 -11    9.43    2.77
  -3  13  10  240.42   13.47
   3  13 -10  207.84   11.07
  -3 -13  10  215.03   13.46
  -3 -13   9   18.85    3.94
   3  13  -9   15.90    3.30
   3  13  -9   12.51    3.14
  -3  13   8   19.06    3.82
  -3 -13   8   13.65    3.88
   3  13  -8   18.03    3.61
   3  13  -8   20.12    3.62
   3  13  -7    9.55    2.64
  -3 -13   7   16.10    4.06
  -3  13   7   16.13    3.64
   3  13  -7   15.70    3.22
   3  13  -6    2.92    2.05
  -3 -13   6    4.02    2.46
  -3  13   6    5.84    2.37
   3  13  -6    1.50    1.52
   3  13  -5    9.02    2.48
  -3  13   5   17.76    3.70
  -3 -13   5   15.83    3.64
   3  13  -5   12.35    2.82
   3  13  -4   21.90    3.70
  -3 -13   4   29.21    4.89
  -3  13   4   36.26    4.55
   3  13  -4   27.56    3.82
  -3 -13   3   12.19    3.22
   3 -13  -3    6.03    2.30
   3  13  -3   15.35    3.03
  -3  13   3   12.75    2.75
  -3 -13   2   35.50    4.77
   3 -13  -2   37.21    4.81
  -3  13   2   31.65    4.13
   3  13  -2   42.20    4.79
   3 -13  -1    1.72    1.99
  -3 -13   1    1.69    1.68
  -3  13   1   -0.27    1.60
   3  13  -1   -0.16    1.73
  -3 -13   0   17.24    3.46
   3 -13   0   12.85    3.37
  -3  13   0   17.78    3.11
   3  13   0   20.59    3.78
   3 -13   1   16.44    3.70
  -3 -13  -1   16.30    3.32
   3  13   1   16.74    3.40
  -3  13  -1   16.52    2.95
  -3  13  -2   50.24    4.95
  -3  13  -2   44.02    4.94
  -3 -13  -2   43.66    5.11
   3 -13   2   54.88    6.08
   3  13   2   53.16    5.74
  -3  13  -3  197.04    9.61
   3 -13   3  172.98    8.36
  -3  13  -3  199.19   10.36
  -3 -13  -3  188.67   10.13
   3 -13   3  190.73   11.54
   3  13   3  203.66   11.27
  -3  13  -4    6.07    2.30
  -3 -13  -4    6.65    2.10
   3 -13   4    7.06    3.13
   3  13   4    2.99    2.13
  -3  13  -4   -1.48    2.01
   3 -13   4    5.44    2.06
  -3  13  -5   13.22    2.70
   3  13   5   11.52    3.15
  -3 -13  -5    9.99    2.55
   3 -13   5   12.55    3.18
  -3  13  -5   13.85    3.05
   3 -13   5    7.06    1.77
   3 -13   6    4.56    2.64
  -3 -13  -6    1.66    1.69
  -3  13  -6    2.23    1.51
   3 -13   6    2.30    1.68
  -3  13  -6    1.09    1.46
   3  13   7   11.06    3.60
   3 -13   7    2.63    2.25
  -3  13  -7    6.84    2.29
  -3  13  -7    4.18    2.14
   3 -13   7    8.56    2.50
  -3  13  -8   60.84    5.52
   3 -13   8   65.02    6.24
  -3  13  -8   65.10    6.14
   3  13   8   75.39    7.62
   3 -13   8   76.82    7.97
   3 -13   9   -2.08    2.41
   3  13   9    7.24    3.72
  -3  13  -9    2.57    2.00
   3 -13   9    1.89    2.14
  -3  13  -9    1.41    1.72
   3  13  10   19.91    4.51
   3 -13  10   19.73    4.85
  -3  13 -10   11.45    2.94
  -3  13 -10   15.15    3.44
   3 -13  10   19.52    3.79
   4   0 -23    1.07    2.22
   4   0 -22   13.26    3.46
   4   0 -21   -1.13    1.72
   4   0 -20    9.86    2.87
   4   0 -20    5.50    2.29
   4   0 -19    0.34    1.52
   4   0 -19    0.09    1.67
  -4   0  19   -0.14    0.93
   4   0 -18   96.45    6.87
   4   0 -18   81.23    6.34
  -4   0  18   80.58    4.34
   4   0 -17    0.00    1.22
   4   0 -17    0.42    1.50
  -4   0  17    0.52    0.73
  -4   0  16  196.40    6.59
   4   0 -16  197.98    9.27
   4   0 -16  190.46    8.86
   4   0 -15    0.08    1.20
  -4   0  15   -0.22    0.61
   4   0 -15   -1.82    1.13
  -4   0  14    2.22    0.79
   4   0 -14    1.35    1.18
   4   0 -14    0.57    1.20
  -4   0  14    0.74    0.92
  -4   0  13   -0.38    0.51
   4   0 -13    0.44    0.97
  -4   0  13   -0.01    0.87
   4   0 -13    0.54    1.22
  -4   0  13   -1.88    0.94
  -4   0  12  138.44    4.80
  -4   0  12  138.60    6.10
  -4   0  12  142.32    6.40
   4   0 -12  146.04    6.71
   4   0 -12  143.28    6.15
  -4   0  12  142.04    5.65
  -4   0  11   -0.19    0.55
  -4   0  11   -0.91    0.74
   4   0 -11    0.91    0.82
  -4   0  11    0.27    0.76
   4   0 -11   -0.41    0.87
  -4   0  11    1.18    0.85
  -4   0  10    2.38    0.71
  -4   0  10    2.75    0.99
   4   0 -10    1.67    0.95
  -4   0  10    2.81    1.01
   4   0 -10    3.49    1.28
  -4   0  10    2.35    0.83
  -4   0   9    0.54    0.63
   4   0  -9   -0.36    0.66
  -4   0   9   -0.04    0.63
  -4   0   9    0.09    0.68
   4   0  -9   -1.40    1.01
  -4   0   9    0.73    0.67
  -4   0   8  185.54    5.07
  -4   0   8  199.21    6.09
  -4   0   8  193.87    6.05
   4   0  -8  195.39    6.32
  -4   0   8  186.60    5.26
   4   0  -8  183.31    5.49
  -4   0   7   -0.09    0.38
   4   0  -7    0.25    0.50
  -4   0   7    0.27    0.58
  -4   0   7   -0.02    0.69
   4   0  -7    0.23    0.73
  -4   0   7    0.01    0.53
  -4   0   6   33.78    1.77
   4   0  -6   31.11    1.75
  -4   0   6   32.26    1.68
   4   0  -6   30.63    2.04
  -4   0   6   32.35    2.03
  -4   0   6   30.64    1.97
  -4   0   5    0.01    0.31
   4   0  -5    0.25    0.35
  -4   0   5    0.19    0.46
   4   0  -5    0.07    0.61
  -4   0   5    0.20    0.42
   4   0  -5    0.78    0.59
  -4   0   4 3244.63   43.67
   4   0  -4 3295.88   43.81
   4   0  -4 3255.20   45.38
  -4   0   4 3200.91   45.38
   4   0  -4 3264.04   45.19
  -4   0   4 3271.91   44.99
  -4   0   3    0.00    0.36
  -4   0   3    0.82    0.59
   4   0  -3    0.34    0.58
   4   0  -3    0.52    0.45
  -4   0   2   44.82    1.95
   4   0  -2   43.20    1.88
   4   0  -2   46.65    1.47
  -4   0   2   45.30    1.46
   4   0  -1   -0.11    0.42
   4   0  -1    0.39    0.25
   4   0   1    0.27    0.40
   4   0   1    0.58    0.50
  -4   0  -1    0.22    0.52
  -4   0  -1    0.52    0.40
   4   0   2    2.95    0.60
   4   0   2    3.71    0.58
  -4   0  -2    2.44    0.69
   4   0   2    3.22    0.80
  -4   0  -2    4.33    0.76
   4   0   3    0.62    0.49
  -4   0  -3   -0.42    0.66
  -4   0  -3    0.22    0.50
   4   0   3    0.75    0.49
   4   0   3    0.14    0.61
   4   0   4 1614.44   25.92
  -4   0  -4 1635.41   25.46
   4   0   4 1647.22   25.05
   4   0   4 1618.14   24.72
  -4   0  -4 1680.75   24.44
   4   0   5   -0.67    0.83
  -4   0  -5    0.31    0.61
   4   0   5    0.45    0.60
  -4   0  -5   -0.05    0.64
   4   0   5   -0.81    0.66
  -4   0  -5   -0.23    0.44
  -4   0  -6   29.65    1.79
   4   0   6   30.81    2.58
   4   0   6   28.99    2.17
  -4   0  -6   31.05    2.20
   4   0   6   27.63    2.12
   4   0   7    0.49    0.92
  -4   0  -7    1.43    1.10
  -4   0  -7   -0.10    0.96
   4   0   7   -0.52    0.87
  -4   0  -7   -0.19    0.53
   4   0   7    1.00    0.84
  -4   0  -8 1579.42   24.12
   4   0   8 1538.20   26.22
  -4   0  -8 1536.11   26.45
  -4   0  -8 1519.40   26.85
   4   0   8 1593.68   26.42
  -4   0  -9   -0.03    0.85
  -4   0  -9    0.52    0.46
   4   0   9   -0.44    0.70
   4   0   9   -0.36    0.74
  -4   0  -9   -0.50    0.73
  -4   0 -10   62.11    2.91
   4   0  10   64.69    4.12
  -4   0 -10   66.17    4.22
  -4   0 -10   64.16    4.29
   4   0  10   65.41    3.98
  -4   0 -11    0.61    0.99
  -4   0 -11   -0.02    0.47
   4   0  11   -0.33    1.08
  -4   0 -11    0.46    1.03
   4   0  11   -0.47    1.12
  -4   0 -12  115.05    4.19
  -4   0 -12  117.17    6.47
  -4   0 -13    0.02    1.20
  -4   0 -13    0.26    0.51
  -4   0 -14   62.41    3.15
  -4   0 -14   65.00    5.28
  -4   0 -15    1.24    0.70
   4   0  15    0.65    1.39
  -4   0 -16    2.60    0.81
  -4   0 -16    2.40    1.74
   4   0  16    0.40    1.48
   4   0  17   -2.25    1.63
  -4   0 -17    3.09    1.95
   4   0  18    7.53    2.53
  -4   0 -18    4.80    2.34
  -4   0 -19    1.43    1.68
   4   0  19    0.11    1.48
   4   0  20    4.26    2.08
  -4   0 -20    5.06    2.58
   4   0  21    2.45    1.82
  -4   0 -21   -1.61    2.12
   4   2 -22    2.17    2.16
   4  -2 -22    4.27    2.90
   4   2 -22   -2.54    2.30
   4  -2 -21    0.78    2.04
   4   2 -21    3.58    2.27
   4   2 -21    1.92    1.72
   4  -2 -20   25.05    4.29
   4   2 -20   26.37    4.06
  -4  -2  20   20.08    2.81
   4   2 -20   20.78    3.77
   4  -2 -19    4.55    2.19
   4   2 -19    8.90    2.77
  -4  -2  19    5.63    1.62
   4   2 -19    2.30    1.72
   4  -2 -18    5.00    2.13
   4   2 -18    2.77    1.83
  -4  -2  18    8.23    1.94
   4   2 -18    8.56    2.64
   4  -2 -17   -1.68    1.78
   4   2 -17    1.00    1.20
   4   2 -17    0.30    1.41
  -4  -2  17   -0.35    0.98
  -4   2  17    0.72    0.48
  -4  -2  16  111.80    5.71
   4  -2 -16  118.04    7.43
   4   2 -16  109.19    6.89
   4   2 -16  117.44    6.60
  -4   2  15   12.10    2.02
  -4   2  15    8.41    0.97
  -4  -2  15    8.81    1.70
   4  -2 -15    9.57    2.47
   4   2 -15   11.58    2.48
   4   2 -15    9.79    2.00
  -4   2  14    0.56    0.44
  -4  -2  14    0.70    0.86
  -4   2  14   -0.69    0.81
   4  -2 -14    3.12    1.72
   4   2 -14    1.61    1.21
  -4  -2  14    0.32    0.96
  -4   2  14    0.75    1.19
   4   2 -14    0.35    0.98
  -4   2  13    7.53    0.82
  -4  -2  13    9.39    1.71
  -4   2  13    8.32    1.61
   4  -2 -13    9.36    1.96
   4   2 -13    7.81    1.89
   4   2 -13    3.60    1.23
  -4   2  13    7.30    1.41
  -4  -2  13    8.37    1.68
  -4  -2  12   54.23    3.52
  -4   2  12   55.26    2.20
   4  -2 -12   56.72    4.38
  -4  -2  12   55.19    4.08
  -4   2  12   51.56    3.44
  -4  -2  12   58.41    3.65
  -4   2  12   54.65    3.99
   4   2 -12   54.75    4.29
   4   2 -12   58.77    3.77
  -4   2  12   57.48    3.68
  -4   2  11   42.03    1.87
  -4  -2  11   44.93    3.08
   4  -2 -11   41.44    3.47
  -4   2  11   42.56    2.86
  -4  -2  11   38.96    3.28
  -4  -2  11   34.35    3.12
  -4   2  11   45.20    3.41
  -4  -2  11   39.77    2.83
   4   2 -11   33.77    3.31
  -4   2  11   41.06    2.92
   4   2 -11   41.14    2.98
  -4   2  10    0.49    0.41
  -4  -2  10    0.17    0.74
   4  -2 -10   -0.72    0.83
  -4  -2  10    0.48    0.81
  -4   2  10   -0.66    0.69
  -4  -2  10    0.94    0.89
  -4   2  10    0.06    0.77
   4   2 -10   -0.36    0.85
  -4  -2  10   -0.27    0.64
  -4   2  10    0.14    0.64
   4   2 -10    0.71    0.87
   4   2  -9  102.76    4.30
  -4  -2   9  100.29    4.41
   4  -2  -9  102.26    5.17
  -4  -2   9  102.59    4.87
  -4   2   9   94.80    3.95
  -4  -2   9   93.83    4.72
  -4   2   9  105.78    4.79
  -4  -2   9   98.11    4.03
  -4   2   9  102.31    4.32
   4   2  -9  100.79    4.22
  -4  -2   8   36.79    2.61
   4   2  -8   34.85    2.42
   4  -2  -8   34.13    2.80
  -4   2   8   34.82    2.17
  -4  -2   8   36.84    2.71
  -4  -2   8   32.36    2.63
   4   2  -8   34.78    2.67
  -4  -2   8   36.39    2.34
  -4   2   8   35.91    2.66
   4   2  -8   33.51    2.33
  -4   2   8   33.27    2.38
   4   2  -7  271.25    7.16
  -4  -2   7  274.12    7.30
   4  -2  -7  255.51    7.51
  -4   2   7  261.27    6.44
  -4  -2   7  284.57    7.82
  -4  -2   7  277.56    7.42
   4   2  -7  271.40    7.44
  -4   2   7  273.57    7.27
  -4  -2   7  277.08    6.68
   4   2  -7  268.16    6.66
  -4   2   7  272.61    7.07
   4   2  -6    5.20    0.97
  -4  -2   6    4.69    0.99
  -4   2   6    4.17    0.94
   4  -2  -6    3.70    0.95
  -4   2   6    3.49    0.65
  -4  -2   6    5.50    1.15
  -4  -2   6    3.34    0.77
   4   2  -6    3.87    1.07
  -4  -2   6    4.69    0.81
  -4   2   6    2.89    0.77
   4   2  -6    3.82    0.72
   4  -2  -5  535.80   10.64
  -4   2   5  527.23   10.41
  -4  -2   5  538.76   10.80
   4   2  -5  548.46   10.72
   4   2  -5  530.03   10.55
  -4  -2   5  524.93   10.59
  -4   2   5  534.21   10.23
  -4  -2   5  514.84    9.67
   4   2  -5  536.76    9.68
   4  -2  -5  549.54    9.42
  -4   2   5  525.11    9.52
  -4  -2   5  539.56   10.96
  -4   2   4  857.74   14.95
  -4  -2   4  899.29   15.31
   4   2  -4  887.32   15.06
   4   2  -4  925.49   15.36
  -4  -2   4  892.16   15.40
  -4   2   4  867.01   14.43
   4   2  -4  880.22   14.15
  -4  -2   4  937.42   15.47
   4  -2  -4  879.01   13.82
  -4   2   4  898.22   14.11
   4  -2  -3    0.54    0.41
   4   2  -3    1.22    0.58
  -4   2   3   -0.02    0.38
  -4  -2   3    0.44    0.42
  -4  -2   3    0.25    0.57
  -4  -2   3   -0.22    0.50
   4   2  -3    0.62    0.55
  -4  -2   2    2.09    0.70
  -4  -2   2    1.49    0.74
   4   2  -2    1.91    0.67
  -4  -2   2    1.63    0.61
   4  -2  -2    2.27    0.53
   4   2  -2    1.44    0.56
  -4   2   2    2.11    0.50
   4   2  -1 1049.96   16.51
  -4  -2   1 1009.98   16.88
  -4  -2   1 1011.36   16.12
   4  -2  -1  999.42   15.77
  -4   2   1 1002.06   15.72
   4   2  -1 1002.05   15.66
  -4  -2   1  987.18   15.80
  -4  -2   0 1483.84   22.46
   4  -2   0 1541.11   23.06
   4   2   0 1546.56   23.83
  -4   2   0 1560.59   21.21
  -4   2   0 1498.07   23.67
   4  -2   0 1524.17   21.60
  -4   2   0 1518.87   23.04
  -4   2   0 1588.45   22.23
   4   2   0 1562.43   22.41
   4  -2   1   10.94    0.81
  -4   2  -1    8.12    1.16
  -4   2  -1   13.45    1.33
   4   2   1   12.59    1.36
  -4   2  -1   11.13    0.75
   4  -2   1   10.75    0.97
  -4   2  -1   13.15    1.07
   4   2   1   11.67    1.01
  -4  -2  -1   12.66    1.07
   4  -2   1    9.74    1.23
  -4   2  -2  134.20    3.86
  -4   2  -2  125.88    4.37
   4  -2   2  133.72    4.56
  -4  -2  -2  132.37    4.75
   4   2   2  134.66    4.62
   4  -2   2  137.28    4.59
  -4   2  -2  135.77    3.25
   4  -2   2  131.79    3.27
   4  -2   2  136.43    3.98
  -4  -2  -2  131.53    3.74
   4   2   2  132.42    3.72
  -4   2  -3   40.49    2.21
  -4   2  -3   43.32    2.56
   4  -2   3   47.22    2.69
  -4  -2  -3   44.85    2.87
   4   2   3   47.28    2.66
  -4  -2  -3   47.40    2.21
   4  -2   3   45.70    2.84
   4  -2   3   41.68    1.86
  -4   2  -3   41.39    1.88
   4  -2   3   41.99    2.18
   4   2   3   45.66    2.17
   4   2   4   92.96    3.41
  -4   2  -4   93.62    3.88
   4  -2   4   88.83    3.85
   4   2   4   80.16    3.70
  -4  -2  -4   82.41    4.09
  -4  -2  -4   90.17    3.34
   4  -2   4   85.31    3.12
  -4   2  -4   87.16    3.18
   4  -2   4   86.56    3.40
  -4   2  -4   91.81    3.58
  -4   2  -5   46.91    2.80
   4  -2   5   47.96    2.90
   4   2   5   51.34    2.65
  -4  -2  -5   46.38    3.24
   4  -2   5   44.43    2.41
  -4   2  -5   45.43    2.48
  -4   2  -5   41.96    2.63
   4   2   5   49.61    2.97
  -4   2  -6   62.33    3.35
   4  -2   6   61.40    3.45
  -4  -2  -6   54.72    3.69
   4   2   6   63.93    3.19
   4  -2   6   54.82    3.03
  -4   2  -6   59.69    3.08
  -4   2  -6   64.96    3.47
   4  -2   6   58.64    3.16
   4   2   6   64.57    3.56
   4   2   7    3.38    0.96
  -4  -2  -7    6.30    0.61
  -4   2  -7    5.64    1.14
   4  -2   7    5.76    1.29
  -4  -2  -7    3.81    1.46
   4   2   7    4.97    1.21
   4  -2   7    4.29    1.05
   4   2   7    3.74    1.08
  -4   2  -7    4.02    1.01
   4  -2   7    3.61    1.23
  -4   2  -7    5.32    1.20
  -4   2  -8   17.15    1.94
   4  -2   8   17.10    2.02
   4   2   8   18.32    2.01
  -4  -2  -8   19.32    2.57
   4  -2   8   17.83    1.92
   4   2   8   24.19    2.40
  -4   2  -8   18.03    2.02
   4  -2   8   18.60    2.00
   4   2   8   21.72    2.20
  -4   2  -8   19.14    2.20
   4   2   9   18.08    2.05
  -4   2  -9   16.74    1.92
   4  -2   9   16.95    2.02
  -4  -2  -9   16.07    2.34
   4  -2   9   13.73    1.92
   4   2   9   16.40    2.09
  -4   2  -9   15.98    2.00
   4  -2   9   17.11    2.09
   4   2   9   15.44    2.03
  -4   2  -9   16.43    2.14
   4   2  10    4.16    1.27
  -4   2 -10    5.58    1.32
   4  -2  10    4.54    1.36
  -4  -2 -10    4.87    1.88
   4  -2  10    3.85    1.21
   4   2  10    2.97    1.28
  -4   2 -10    2.90    1.15
   4   2  10    5.02    1.44
   4  -2  10    3.98    1.20
  -4   2 -10    5.42    1.46
  -4   2 -11    0.63    0.64
   4  -2  11    1.31    1.07
   4   2  11    2.94    1.08
  -4  -2 -11    1.11    1.12
   4  -2  11    2.32    0.98
  -4   2 -11    3.28    1.29
  -4   2 -11    1.61    1.12
   4   2  11    1.75    0.98
   4  -2  12    1.33    0.93
  -4   2 -12    1.93    0.74
   4   2  12    2.51    1.07
  -4  -2 -12   -0.31    1.18
  -4   2 -12    1.30    1.02
  -4   2 -12    0.54    1.11
   4  -2  13    3.88    1.23
  -4   2 -13    0.93    0.69
   4   2  13    0.83    1.05
  -4  -2 -13    3.03    1.63
  -4   2 -13    3.71    1.53
  -4   2 -13    0.88    1.40
   4   2  14    8.80    1.91
  -4   2 -14    9.70    2.21
  -4  -2 -14   12.46    2.96
  -4   2 -14    7.43    1.49
  -4   2 -14    7.74    2.03
   4  -2  14   12.26    2.00
  -4   2 -15    3.91    1.18
  -4   2 -15    2.83    1.50
   4   2  15    3.27    1.56
  -4   2 -15    5.86    1.89
  -4  -2 -15    4.66    2.00
  -4   2 -16    3.84    1.35
  -4  -2 -16    0.26    1.62
  -4   2 -16    3.62    1.81
   4   2  16    5.01    1.72
  -4   2 -16    2.77    1.77
  -4   2 -17   19.94    3.39
  -4  -2 -17   24.72    4.29
   4   2  17   18.94    3.14
  -4   2 -17   20.52    3.24
  -4   2 -18    1.84    1.87
  -4  -2 -18    0.02    1.70
   4  -2  18    3.08    1.93
   4   2  18    3.43    2.05
  -4   2 -18    6.16    1.95
  -4  -2 -19   14.71    3.96
  -4   2 -19   15.67    3.27
   4  -2  19   13.71    3.44
   4   2  19   16.14    3.35
  -4   2 -19   12.63    2.98
   4   2  20    9.98    2.85
   4  -2  20    8.83    2.88
  -4  -2 -20   12.23    3.71
   4   2  21    4.94    1.94
   4  -2  21   10.32    3.10
  -4   2 -21   10.55    3.01
  -4  -2 -21   12.36    3.87
   4   4 -22   26.67    4.61
   4   4 -22   24.43    4.11
   4  -4 -22   33.33    5.81
   4  -4 -21   60.38    6.92
   4   4 -21   53.79    5.69
   4   4 -21   53.69    6.21
  -4  -4  21   46.34    4.72
   4   4 -20   24.74    4.02
   4  -4 -20   33.46    5.27
   4   4 -20   28.56    4.43
  -4  -4  20   29.93    3.84
   4  -4 -19    6.90    2.77
   4   4 -19    3.68    1.49
   4   4 -19    4.09    2.21
  -4  -4  19    4.09    1.89
   4  -4 -18    8.20    2.67
   4   4 -18   11.27    2.70
   4   4 -18   11.38    2.74
  -4  -4  18   11.73    2.30
   4  -4 -17   16.12    3.48
   4   4 -17   23.80    3.34
   4   4 -17   16.86    3.18
  -4  -4  17   19.27    2.81
  -4   4  16   62.75    4.33
  -4  -4  16   74.79    5.38
   4   4 -16   70.10    5.65
   4   4 -16   80.45    5.50
   4  -4 -16   76.01    6.47
  -4   4  15  103.32    5.26
  -4  -4  15   97.35    5.99
   4   4 -15  113.40    6.85
   4   4 -15  105.09    6.11
   4  -4 -15  109.70    7.54
  -4   4  14   75.79    4.31
  -4  -4  14   82.21    5.32
   4   4 -14   81.67    5.75
   4   4 -14   86.29    5.24
   4  -4 -14   94.37    6.58
  -4   4  13    1.34    0.67
  -4   4  13    2.12    1.28
   4  -4 -13    2.31    1.39
  -4  -4  13    1.62    1.07
   4   4 -13    1.75    0.95
   4   4 -13   -0.06    1.13
   4   4 -13    0.10    0.93
  -4   4  12  309.75    8.35
   4  -4 -12  318.11   11.47
   4   4 -12  302.45    9.75
  -4  -4  12  311.76   10.28
   4   4 -12  285.93   10.46
  -4  -4  12  297.95    9.32
  -4   4  12  297.37    9.82
   4   4 -12  305.66    9.61
  -4   4  11   36.36    2.46
   4  -4 -11   33.41    3.57
  -4  -4  11   38.43    3.43
   4   4 -11   36.75    3.15
  -4   4  11   39.81    1.53
   4   4 -11   33.74    3.34
  -4  -4  11   35.56    2.98
  -4   4  11   34.73    3.22
   4   4 -11   35.92    3.10
  -4   4  10   24.06    1.89
  -4  -4  10   23.39    2.65
  -4   4  10   25.31    1.39
   4   4 -10   24.54    2.52
  -4  -4  10   23.69    2.73
   4  -4 -10   24.53    3.00
  -4   4  10   24.97    2.72
   4   4 -10   24.04    2.53
  -4  -4  10   23.02    2.50
  -4   4  10   23.04    2.59
  -4  -4  10   25.03    2.39
   4   4 -10   23.14    2.32
  -4   4   9    0.05    0.45
  -4  -4   9    1.85    1.03
  -4  -4   9   -0.81    1.04
   4   4  -9    0.61    0.66
  -4   4   9    0.81    0.38
  -4   4   9    0.04    0.75
   4   4  -9   -0.07    0.86
  -4  -4   9   -0.07    0.89
  -4   4   9    0.11    0.91
  -4  -4   9   -0.38    0.76
   4   4  -9   -0.14    0.67
  -4  -4   8 1412.18   25.65
   4   4  -8 1381.02   25.07
  -4   4   8 1429.77   21.54
  -4   4   8 1446.64   25.78
   4   4  -8 1451.57   25.22
  -4   4   8 1426.49   24.99
   4   4  -8 1390.51   23.80
  -4  -4   8 1471.30   25.81
  -4   4   8 1422.16   21.68
   4   4  -7  476.76   11.59
  -4  -4   7  489.89   12.08
  -4   4   7  478.27    9.43
  -4   4   7  461.86   11.92
   4   4  -7  503.40   11.69
  -4  -4   7  500.32   11.98
   4   4  -7  459.64   10.64
  -4  -4   7  497.93   11.96
  -4   4   7  476.15    8.90
  -4  -4   6   28.03    2.51
  -4  -4   6   24.67    2.34
   4   4  -6   25.83    2.30
  -4   4   6   24.77    1.73
  -4   4   6   23.95    2.40
  -4  -4   6   25.91    2.49
   4   4  -6   25.98    2.32
   4   4  -6   26.29    2.16
  -4   4   6   23.36    1.42
   4  -4  -5 2986.49   39.88
  -4  -4   5 2935.31   44.06
   4   4  -5 3023.48   44.58
  -4  -4   5 2927.37   44.85
  -4   4   5 2925.62   42.42
  -4  -4   5 2867.54   44.45
  -4   4   5 2952.28   45.21
   4   4  -5 2952.87   44.21
   4   4  -5 2907.80   43.16
  -4   4   5 2855.92   40.27
  -4  -4   4 1882.09   30.86
   4   4  -4 1917.61   30.46
  -4  -4   4 1950.95   31.00
  -4   4   4 1870.18   29.25
   4   4  -4 1928.30   30.34
  -4  -4   4 1904.89   29.78
   4  -4  -4 1956.62   26.56
  -4   4   4 1888.58   26.82
  -4  -4   3   36.46    2.65
   4   4  -3   38.66    2.58
  -4  -4   3   41.47    2.88
  -4   4   3   35.20    2.40
  -4   4   3   35.96    1.63
   4   4  -3   40.38    2.67
  -4  -4   3   38.56    2.35
   4  -4  -3   35.98    1.61
  -4  -4   2  178.21    6.30
   4   4  -2  160.62    5.74
   4   4  -2  168.57    5.45
  -4   4   2  166.94    5.55
  -4  -4   2  164.71    5.62
  -4   4   2  169.48    4.28
  -4  -4   2  173.23    4.93
   4  -4  -2  170.90    4.33
   4  -4  -1  204.56    6.59
  -4   4   1  202.18    5.76
   4   4  -1  209.31    6.63
   4   4  -1  211.44    5.95
  -4   4   1  195.04    6.23
  -4  -4   1  219.34    6.24
  -4  -4   1  214.07    5.36
   4   4  -1  207.40    5.11
   4  -4  -1  204.65    5.21
   4  -4   0   33.59    2.08
   4   4   0   34.78    2.16
  -4   4   0   31.68    2.45
  -4  -4   0   33.13    2.19
  -4  -4   0   36.35    1.90
   4   4   0   34.28    1.73
   4  -4   0   30.67    2.53
   4  -4   0   32.78    2.25
  -4   4   0   33.29    2.00
   4   4   0   35.31    2.71
   4   4   1  358.46    6.79
  -4   4  -1  356.65    9.22
   4   4   1  354.02    7.82
  -4  -4  -1  348.94    7.99
   4  -4   1  334.24    9.33
  -4   4  -1  338.01    7.48
   4  -4   1  365.07    8.27
   4   4   1  363.82    9.82
   4  -4   1  340.40    8.28
  -4   4  -1  345.98    8.18
  -4  -4  -1  346.46    7.03
   4   4   2    4.79    0.66
  -4  -4  -2    4.47    0.90
  -4   4  -2    3.74    1.04
   4  -4   2    3.47    1.09
   4   4   2    4.10    1.30
   4  -4   2    5.27    1.11
   4  -4   2    5.10    0.85
  -4   4  -2    6.51    1.02
  -4   4  -2    7.86    1.21
  -4  -4  -2    4.90    0.74
  -4   4  -3  312.21    8.97
  -4  -4  -3  316.58    6.98
   4  -4   3  311.67    7.56
   4  -4   3  324.71    9.32
   4   4   3  331.13    9.86
  -4   4  -3  322.85    7.30
  -4   4  -3  318.69    8.05
   4   4   3  332.41    6.42
  -4  -4  -3  331.25    6.64
  -4   4  -4 1005.28   19.46
  -4  -4  -4  973.94   15.84
   4  -4   4  990.91   19.77
  -4  -4  -4 1019.90   15.94
   4   4   4  961.80   20.00
  -4   4  -4  994.60   17.02
   4  -4   4  969.10   17.27
  -4   4  -4  997.86   18.17
   4   4   4  999.06   15.73
  -4   4  -5  400.53   10.77
  -4  -4  -5  399.48    7.47
   4  -4   5  393.06   10.99
   4   4   5  400.24   11.31
   4  -4   5  393.35    9.34
  -4   4  -5  395.84    9.10
   4  -4   5  404.10    9.97
  -4   4  -5  406.59    9.86
   4   4   6   24.01    1.73
  -4  -4  -6   24.27    1.27
  -4   4  -6   25.76    2.55
   4  -4   6   28.59    2.87
   4   4   6   22.85    2.64
  -4  -4  -6   21.35    2.76
  -4   4  -6   27.01    2.22
   4  -4   6   28.59    2.29
   4  -4   6   29.00    2.54
  -4   4  -6   26.96    2.39
   4   4   7  125.09    4.37
  -4  -4  -7  121.16    2.74
  -4   4  -7  119.90    5.65
   4  -4   7  111.87    5.70
  -4  -4  -7  111.81    6.47
   4   4   7  120.46    5.94
   4  -4   7  118.08    4.87
  -4   4  -7  113.84    4.81
   4  -4   7  123.82    5.36
   4   4   8  130.78    4.81
  -4   4  -8  120.99    5.81
   4  -4   8  133.10    6.36
  -4  -4  -8  112.76    6.86
   4   4   8  123.21    6.13
  -4   4  -8  123.66    5.30
   4  -4   8  123.59    5.30
   4  -4   8  124.66    5.65
  -4   4  -8  125.57    5.64
   4   4   9   16.61    1.85
  -4   4  -9   10.46    1.93
   4  -4   9   14.24    2.12
  -4  -4  -9   15.30    2.64
   4   4   9   13.58    2.22
   4  -4   9   14.78    1.96
  -4   4  -9   15.60    2.06
  -4   4  -9   12.11    2.00
   4  -4   9   13.21    1.93
  -4   4 -10   80.52    4.86
   4  -4  10   85.31    5.24
  -4  -4 -10   72.02    5.75
   4   4  10   74.47    4.08
   4  -4  10   73.26    4.40
  -4   4 -10   72.01    4.42
  -4   4 -10   80.73    4.91
   4  -4  11   58.61    4.41
  -4   4 -11   51.94    3.94
   4   4  11   56.97    3.76
  -4  -4 -11   61.16    5.35
  -4   4 -11   57.44    4.13
  -4   4 -11   56.61    4.26
   4  -4  12   39.15    3.72
  -4   4 -12   37.43    3.47
   4   4  12   42.49    3.46
  -4  -4 -12   41.40    4.70
  -4   4 -12   37.81    3.63
  -4   4 -12   41.63    3.82
   4   4  13   43.11    3.50
  -4  -4 -13   45.61    5.03
  -4   4 -13   34.46    3.67
  -4   4 -13   32.38    3.48
   4  -4  13   35.89    3.73
   4   4  14   34.65    3.41
  -4  -4 -14   32.05    4.57
  -4   4 -14   33.52    3.72
  -4   4 -14   26.90    3.35
   4  -4  14   29.33    3.53
   4  -4  15    9.31    2.25
  -4   4 -15    5.83    1.84
  -4  -4 -15    9.14    2.96
  -4   4 -15    7.92    2.14
   4   4  15    8.43    2.11
   4   4  16  106.47    6.47
  -4  -4 -16  105.06    8.47
  -4   4 -16  103.69    7.24
  -4   4 -16  104.37    7.01
   4  -4  16  108.26    6.78
   4   4  17   33.20    3.86
  -4  -4 -17   39.38    5.70
  -4   4 -17   36.39    4.55
  -4   4 -17   35.39    4.37
   4  -4  17   38.06    4.16
  -4   4 -18    2.69    1.65
  -4   4 -18    1.20    1.59
   4   4  18    1.88    2.00
  -4  -4 -18    1.37    1.98
  -4   4 -19    4.13    2.10
   4   4  19   -0.69    1.51
   4  -4  19    0.91    1.97
  -4   4 -19    3.36    2.00
  -4  -4 -19    3.35    3.02
   4  -4  20   65.06    7.27
  -4  -4 -20   75.04    8.14
   4   4  20   61.49    5.64
  -4   4 -20   51.48    5.95
  -4   4 -20   63.15    6.28
  -4   4 -21   27.85    4.54
  -4  -4 -21   33.49    5.84
   4  -4  21   31.33    5.14
  -4   4 -21   32.78    5.07
   4   6 -21    2.47    2.28
   4   6 -21    3.99    2.66
  -4  -6  21   -1.12    1.81
  -4  -6  20   58.08    5.68
   4   6 -20   65.06    6.07
   4   6 -20   49.17    5.95
  -4  -6  19    5.22    2.15
   4   6 -19    7.93    2.50
   4   6 -19    7.22    2.48
   4   6 -18    4.80    2.13
   4   6 -18    5.51    2.10
  -4  -6  17   10.45    2.69
   4   6 -17    4.73    2.34
   4   6 -17    8.11    2.48
  -4   6  17    5.77    1.43
  -4  -6  16    2.85    1.77
   4   6 -16    6.89    2.12
   4   6 -16    3.32    1.81
  -4  -6  15   -0.59    1.27
   4   6 -15   -1.94    1.88
   4   6 -15    0.83    1.36
   4   6 -14   52.95    5.14
  -4   6  14   49.21    3.08
   4   6 -14   56.02    4.57
  -4  -6  14   57.93    5.05
  -4   6  13    1.41    0.66
  -4  -6  13    1.35    1.26
   4   6 -13    0.53    1.21
   4   6 -13   -0.04    1.27
   4   6 -12  535.31   15.03
  -4   6  12  499.62   10.54
  -4  -6  12  519.19   15.62
   4   6 -12  539.74   14.21
  -4  -6  11  127.63    7.11
  -4   6  11  118.14    3.30
   4   6 -11  111.89    6.35
  -4   6  11  110.20    3.76
   4   6 -11  131.11    6.22
  -4   6  10   84.71    5.63
  -4   6  10   83.09    3.08
  -4  -6  10   93.71    5.92
   4   6 -10   92.41    5.41
   4   6 -10   83.04    4.87
  -4   6  10   80.95    2.82
  -4  -6   9   34.14    3.62
  -4   6   9   32.36    2.11
  -4   6   9   32.68    3.66
   4   6  -9   32.23    3.14
   4   6  -9   29.66    2.79
  -4   6   9   30.41    1.42
  -4  -6   8  828.41   19.32
   4   6  -8  798.63   18.28
  -4   6   8  813.43   14.85
  -4  -6   8  811.99   18.59
   4   6  -8  835.62   18.07
  -4  -6   8  834.40   18.52
   4   6  -8  793.94   17.24
  -4   6   8  759.37   19.37
   4   6  -7    0.91    0.90
  -4   6   7    3.66    0.95
  -4  -6   7    3.49    1.48
  -4   6   7    2.25    1.21
  -4  -6   7    1.63    1.21
   4   6  -7    1.78    1.05
   4   6  -7    1.52    1.03
  -4  -6   7    3.55    1.14
  -4  -6   6   65.49    4.56
  -4   6   6   65.31    3.39
   4   6  -6   63.98    4.16
  -4  -6   6   67.38    4.51
  -4   6   6   65.95    4.67
   4   6  -6   63.80    4.10
   4   6  -6   66.55    3.93
  -4  -6   6   70.89    4.20
  -4  -6   5   74.62    4.68
  -4   6   5   65.24    3.55
  -4  -6   5   72.12    4.65
   4   6  -5   72.81    4.40
   4   6  -5   69.13    4.22
   4   6  -5   68.21    3.93
  -4  -6   5   72.28    4.02
   4   6  -4  590.89   13.86
   4  -6  -4  581.39    9.04
  -4  -6   4  573.37   12.76
   4   6  -4  565.22   13.73
  -4  -6   4  577.00   14.25
  -4   6   4  596.08   12.98
  -4  -6   4  568.30   14.70
  -4  -6   3  469.21   12.39
  -4   6   3  481.85   11.55
   4   6  -3  463.16   11.86
  -4  -6   3  478.43   10.83
   4  -6  -3  478.95    8.58
   4   6  -3  463.58   12.07
   4  -6  -3  477.07   12.03
  -4  -6   3  496.80   13.53
  -4   6   3  482.98   12.44
  -4   6   2   70.02    3.99
  -4  -6   2   62.83    3.98
   4   6  -2   64.53    3.78
  -4  -6   2   68.27    3.30
   4  -6  -2   66.33    2.79
  -4   6   2   69.90    4.06
  -4  -6   2   78.51    5.09
   4  -6  -2   63.89    4.00
   4   6  -2   64.15    4.10
   4   6  -1   44.62    3.00
  -4  -6   1   36.69    2.92
  -4   6   1   34.89    2.88
  -4   6   1   37.70    2.86
   4  -6  -1   32.46    2.95
  -4  -6   1   41.16    3.73
   4   6  -1   37.98    3.20
  -4  -6   1   41.16    2.40
   4  -6  -1   38.23    2.37
   4  -6   0 1102.92   19.06
   4  -6   0 1056.09   21.77
   4   6   0 1090.72   21.92
  -4   6   0 1066.02   19.70
  -4  -6   0 1131.84   18.07
  -4  -6   0 1068.46   20.41
   4   6   0 1089.11   19.87
  -4   6   0 1051.22   21.00
   4   6   1   19.62    2.72
   4  -6   1   19.26    2.27
   4  -6   1   19.41    2.50
  -4   6  -1   18.51    1.88
   4  -6   1   19.42    2.04
  -4   6  -1   19.74    2.28
  -4  -6  -1   18.72    2.01
   4   6   1   19.61    1.90
  -4  -6  -1   19.34    1.44
   4   6   2   29.59    2.23
  -4  -6  -2   30.55    2.48
  -4   6  -2   25.75    2.77
   4  -6   2   28.03    2.59
   4  -6   2   32.10    3.21
   4   6   2   32.23    3.32
   4  -6   2   28.45    2.53
  -4   6  -2   30.90    2.39
  -4   6  -2   28.20    2.55
  -4  -6  -2   27.55    1.64
  -4  -6  -3  105.18    4.45
   4   6   3   99.42    4.06
  -4   6  -3   96.34    5.36
   4  -6   3   88.14    5.30
   4  -6   3  100.23    4.85
   4   6   3  109.44    6.25
   4  -6   3   93.60    4.88
   4   6   3  104.24    6.00
  -4   6  -3  107.36    4.52
  -4   6  -3  101.32    4.92
  -4  -6  -3  107.50    3.13
  -4  -6  -4 1098.38   19.51
  -4   6  -4 1089.70   22.56
   4  -6   4 1102.83   23.41
   4  -6   4 1082.32   20.92
   4   6   4 1085.51   24.03
  -4  -6  -4 1137.69   16.71
  -4   6  -4 1143.19   20.19
  -4   6  -4 1108.37   21.28
   4   6   4 1127.58   16.19
  -4   6  -5  781.15   18.51
   4  -6   5  836.63   19.53
   4  -6   5  822.51   17.18
   4   6   5  823.36   20.10
  -4   6  -5  881.15   16.66
  -4   6  -5  831.99   17.38
   4   6   5  865.78   12.43
  -4  -6  -6   53.26    2.75
  -4   6  -6   52.24    4.12
   4  -6   6   52.45    3.57
   4  -6   6   55.30    4.47
   4   6   6   48.58    4.46
  -4   6  -6   52.97    3.40
  -4   6  -6   54.78    3.80
   4   6   6   55.01    1.93
   4  -6   7   40.53    3.18
   4  -6   7   40.27    3.90
  -4   6  -7   47.38    3.94
  -4   6  -7   39.03    3.06
  -4   6  -7   43.14    3.45
   4   6   7   38.72    1.79
  -4   6  -8  100.05    5.06
   4  -6   8   96.44    5.14
  -4  -6  -8  100.87    3.26
   4  -6   8  107.94    6.46
  -4   6  -8   98.85    5.39
   4   6   8  100.80    3.34
   4  -6   9   98.52    5.38
  -4   6  -9  111.10    5.53
   4  -6   9  108.51    6.61
  -4   6  -9   99.76    5.66
   4   6   9  107.63    3.79
  -4   6 -10  170.76    7.26
  -4   6 -10  165.57    7.56
   4   6  10  174.57    5.45
   4  -6  10  173.87    8.59
  -4   6 -11   -0.67    1.09
   4  -6  11    3.06    1.66
  -4   6 -11    1.09    1.04
   4   6  11    0.27    0.66
   4  -6  12  152.53    8.38
  -4  -6 -12  159.62    9.69
  -4   6 -12  135.98    7.21
  -4   6 -12  138.22    7.53
   4   6  12  155.86    5.80
  -4   6 -13  139.58    7.68
  -4  -6 -13  142.47    9.23
   4  -6  13  133.20    8.02
  -4   6 -13  130.44    7.27
   4   6  13  140.14    5.84
  -4   6 -14   16.41    2.90
  -4  -6 -14   18.96    3.78
   4  -6  14   13.24    2.85
  -4   6 -14   15.35    2.77
   4   6  14   18.39    2.28
  -4   6 -15    0.37    1.66
  -4  -6 -15   -0.99    1.99
   4  -6  15    1.89    2.03
  -4   6 -15   -1.96    1.71
   4   6  15    1.52    1.06
  -4   6 -16    3.04    1.91
  -4  -6 -16   -0.07    1.82
   4  -6  16   -0.99    1.58
  -4   6 -16    1.05    1.40
   4   6  16    1.54    1.18
   4  -6  17   13.33    2.85
  -4   6 -17   10.10    2.73
  -4   6 -17   12.92    3.11
  -4  -6 -17   11.77    3.29
   4  -6  18   31.45    4.47
  -4   6 -18   33.76    4.78
  -4   6 -18   29.80    4.38
  -4  -6 -18   35.71    5.70
   4  -6  19    9.21    2.67
  -4   6 -19   10.09    2.99
  -4   6 -19    1.45    1.96
   4  -6  19    6.90    2.58
  -4  -6 -19   12.15    3.85
  -4   6 -20    4.32    2.24
  -4   6 -20    2.07    2.37
  -4  -6 -20    6.46    3.62
  -4  -8  19    3.56    2.14
   4   8 -19    7.91    2.68
   4   8 -19    7.19    2.95
  -4  -8  18   23.24    4.15
   4   8 -18   22.27    3.67
   4   8 -18   20.14    3.73
   4   8 -17    0.11    1.84
   4   8 -17   -5.67    2.75
  -4  -8  16   -0.52    1.39
   4   8 -16    0.40    1.97
   4   8 -16    4.91    2.40
   4   8 -15   68.46    5.89
  -4  -8  15   68.61    6.33
   4   8 -15   70.38    5.79
  -4  -8  14    6.63    2.22
   4   8 -14    9.55    2.64
   4   8 -14    7.26    1.99
   4   8 -13   22.94    3.10
   4   8 -13   25.47    3.52
  -4  -8  13   24.81    3.72
   4   8 -12  166.92    8.35
  -4  -8  12  168.40    9.46
   4   8 -12  156.23    7.79
   4   8 -11   12.71    2.69
  -4   8  11   11.95    1.36
   4   8 -11   11.55    2.11
   4   8 -10  127.35    6.78
  -4  -8  10  122.15    7.61
  -4   8  10  104.97    4.34
   4   8 -10  121.57    6.87
   4   8  -9   46.25    4.09
   4   8  -9   56.42    4.53
  -4   8   9   49.42    3.06
  -4  -8   9   57.34    5.09
   4   8  -8    0.13    1.25
  -4  -8   8    4.22    1.69
  -4   8   8    3.43    1.14
   4   8  -8    2.37    1.29
  -4  -8   7   29.69    3.69
  -4   8   7   26.94    2.51
   4   8  -7   28.91    3.07
  -4  -8   7   27.57    3.01
   4   8  -7   26.34    3.09
  -4   8   6    4.26    1.22
  -4  -8   6    6.39    1.85
   4   8  -6    5.67    1.66
   4   8  -6    2.48    1.26
  -4  -8   6    4.36    1.27
   4   8  -5   18.91    2.55
  -4   8   5   17.97    2.73
  -4  -8   5   20.19    2.34
  -4   8   5   20.84    2.34
  -4  -8   5   18.63    2.71
   4   8  -4   14.55    2.19
  -4  -8   4   14.67    1.96
  -4   8   4   12.25    1.80
  -4  -8   4   13.27    2.29
  -4   8   4   16.25    2.41
  -4   8   3  269.26    9.14
  -4  -8   3  281.29   10.34
  -4  -8   3  273.24    8.27
   4  -8  -3  271.35    5.96
   4   8  -3  268.40    9.68
   4  -8  -3  279.70    9.90
  -4   8   3  281.50    9.98
   4   8  -2   67.64    4.46
  -4   8   2   72.95    4.61
  -4  -8   2   75.15    5.03
   4  -8  -2   71.72    3.14
  -4   8   2   81.17    4.96
   4  -8  -2   72.87    4.99
   4   8  -2   74.07    4.92
  -4  -8   1  216.25    8.62
  -4   8   1  213.57    8.38
   4  -8  -1  227.50    9.18
   4   8  -1  216.15    8.82
  -4   8   1  229.61    8.26
  -4  -8   1  218.78    6.59
   4  -8  -1  233.85    6.68
   4  -8   0  102.77    4.60
   4   8   0  105.85    6.11
   4  -8   0  100.20    6.06
  -4   8   0  104.08    5.25
  -4  -8   0  104.12    4.09
   4   8   0   92.41    5.07
  -4   8   0   91.74    5.47
  -4  -8   0  103.47    5.67
   4  -8   1   41.88    3.97
   4   8   1   37.52    3.77
  -4   8  -1   38.96    3.17
   4  -8   1   36.51    2.89
  -4   8  -1   34.65    3.40
   4   8   1   36.29    2.99
  -4  -8  -1   38.38    3.34
  -4  -8  -1   37.21    2.21
  -4  -8  -2   19.07    2.33
   4   8   2   19.59    2.21
   4   8   2   20.29    2.85
   4  -8   2   25.14    3.00
   4  -8   2   24.58    3.19
   4  -8   2   27.28    2.69
  -4   8  -2   23.96    2.53
  -4   8  -2   21.08    2.55
  -4  -8  -2   19.11    1.53
   4   8   3   51.29    3.40
  -4  -8  -3   50.70    3.65
   4  -8   3   50.58    4.19
   4  -8   3   51.25    4.64
   4   8   3   53.18    4.76
   4  -8   3   50.25    3.84
  -4   8  -3   50.87    3.60
  -4   8  -3   44.31    3.67
  -4  -8  -3   45.29    1.92
   4  -8   4   -0.26    1.05
   4   8   4    2.50    1.47
  -4  -8  -4    0.25    0.87
   4  -8   4    0.15    0.96
  -4   8  -4   -0.40    0.85
  -4   8  -4   -0.69    1.08
   4   8   4   -0.17    0.69
  -4   8  -5   31.62    2.88
   4  -8   5   28.73    3.22
   4  -8   5   30.91    3.74
   4   8   5   27.98    3.87
  -4   8  -5   31.88    3.25
   4   8   5   27.08    2.33
  -4  -8  -5   29.12    2.66
  -4  -8  -6    2.05    1.07
   4  -8   6    1.99    1.55
   4  -8   6    1.06    1.24
  -4   8  -6    0.05    1.10
  -4   8  -6   -0.30    0.83
   4  -8   7   15.99    2.84
  -4  -8  -7   11.97    1.67
  -4   8  -7   15.92    2.49
  -4   8  -7   12.90    2.14
  -4  -8  -8  337.46    8.73
   4  -8   8  341.06   13.27
  -4   8  -8  350.67   10.84
   4  -8   9   69.87    5.95
  -4   8  -9   63.90    4.93
  -4   8  -9   62.73    4.46
   4  -8  10    2.08    1.71
  -4   8 -10    1.89    1.30
  -4   8 -10   -1.46    1.68
   4  -8  11   13.61    2.98
  -4   8 -11   13.36    2.37
  -4   8 -11    7.31    1.85
   4  -8  12   56.75    5.52
  -4   8 -12   57.50    5.33
  -4   8 -12   64.47    5.32
   4  -8  13    1.92    1.77
  -4   8 -13    0.91    1.48
  -4   8 -13    0.06    1.64
   4  -8  14   39.04    4.93
  -4   8 -14   27.30    3.95
  -4   8 -14   34.02    4.18
   4  -8  15   -2.96    2.04
  -4   8 -15    2.50    1.68
  -4   8 -15   -0.66    1.34
   4  -8  16   11.03    2.95
  -4   8 -16   14.54    3.03
  -4   8 -16    9.91    2.73
   4  -8  17   36.33    5.10
  -4   8 -17   31.97    4.42
  -4   8 -17   31.10    4.42
   4  -8  17   29.36    5.14
   4  -8  18   -1.87    2.19
  -4   8 -18   -2.33    2.37
  -4   8 -18    0.68    1.86
   4  -8  18    2.74    2.10
  -4 -10  17   25.74    4.64
   4  10 -17   16.21    3.78
   4  10 -17   25.02    4.10
  -4 -10  16   64.15    7.00
   4  10 -16   60.00    5.95
   4  10 -16   60.84    6.17
   4  10 -15   29.39    4.54
   4  10 -15   37.85    4.64
   4  10 -14   -2.03    1.50
  -4 -10  14    4.69    2.41
   4  10 -14    2.87    1.65
   4  10 -13   18.40    3.34
  -4 -10  13   23.39    4.20
   4  10 -13   19.07    3.04
   4  10 -12   64.07    5.68
   4  10 -12   67.98    5.67
  -4 -10  12   74.39    6.97
   4  10 -11    0.22    1.44
  -4 -10  11    2.52    2.15
   4  10 -10   -4.09    1.82
  -4 -10  10    0.32    2.05
   4  10 -10    1.37    1.27
   4  10  -9   15.06    2.89
  -4 -10   9   23.26    4.00
   4  10  -9   19.79    2.96
   4  10  -8   19.92    3.01
  -4  10   8   21.38    2.49
   4  10  -8   19.28    2.81
  -4 -10   8   21.93    3.63
  -4  10   8   17.22    3.42
   4  10  -7   83.11    6.01
  -4 -10   7   91.86    7.13
  -4  10   7   82.84    4.96
   4  10  -7   81.89    5.68
  -4  10   7  103.50    7.39
   4  10  -6   47.68    4.52
  -4 -10   6   37.70    4.60
  -4  10   6   46.05    3.81
   4  10  -6   47.78    4.34
  -4  10   6   50.49    5.07
   4  10  -5  174.88    8.43
  -4 -10   5  154.91    7.11
  -4 -10   5  187.19    9.71
   4  10  -4  185.66    8.71
  -4 -10   4  172.89    7.18
  -4  10   4  168.61    8.58
  -4 -10   3  104.86    7.03
  -4 -10   3   89.09    4.79
   4 -10  -3   90.25    2.67
   4 -10  -3   91.06    2.95
   4  10  -3   99.66    6.45
   4 -10  -3  102.29    6.68
  -4 -10   2   55.13    4.96
   4 -10  -2   47.02    4.60
  -4  10   2   44.17    4.12
   4  10  -2   53.50    4.78
   4 -10  -2   40.32    2.18
  -4 -10   2   45.90    3.26
   4 -10  -2   46.15    2.62
   4  10  -1    3.70    1.58
  -4  10   1   -0.92    1.47
  -4 -10   1    2.04    1.05
   4 -10  -1    1.29    1.00
   4 -10  -1    1.43    1.42
  -4 -10   1    0.68    1.41
  -4 -10   0  603.10   17.11
  -4  10   0  644.89   16.42
   4 -10   0  629.24   18.42
   4  10   0  631.50   17.87
  -4 -10   0  572.13   12.58
   4 -10   0  639.84   14.24
   4  10   1   35.27    4.02
   4 -10   1   44.20    4.72
  -4  10  -1   43.37    3.78
   4 -10   1   39.45    3.23
  -4 -10  -1   43.78    4.14
  -4 -10  -1   36.62    2.31
  -4 -10  -2   -0.68    1.43
   4  10   2    2.11    1.48
   4 -10   2    0.81    1.31
  -4  10  -2    1.46    1.08
  -4  10  -2    0.69    1.15
   4 -10   2    0.11    1.09
  -4 -10  -2    0.66    0.62
  -4  10  -3   42.61    3.77
   4 -10   3   40.39    3.65
  -4  10  -3   42.00    4.09
   4 -10   3   42.76    4.83
   4  10   3   53.50    5.27
   4  10   4  174.15    9.70
   4 -10   4  163.22    9.32
   4 -10   4  160.11    7.72
  -4  10  -4  166.75    7.46
  -4  10  -4  151.12    7.75
   4  10   4  153.84    6.66
  -4 -10  -4  174.66    7.89
   4  10   5   24.04    3.55
  -4 -10  -5   23.16    2.96
   4 -10   5   24.03    3.82
   4 -10   5   23.44    3.19
  -4  10  -5   19.73    2.70
   4  10   5   21.92    2.47
  -4  10  -5   28.35    3.43
  -4  10  -6   20.48    2.73
   4 -10   6   21.03    3.15
  -4 -10  -6   23.34    2.82
   4  10   6   23.80    4.13
   4 -10   6   23.33    3.91
  -4  10  -6   23.94    3.32
  -4  10  -7   -1.64    1.50
   4 -10   7   -1.03    1.64
   4  10   7   -1.77    2.02
  -4 -10  -7    1.30    1.21
   4 -10   7   -1.62    1.62
  -4  10  -7    1.49    1.31
  -4  10  -8  172.03    8.14
   4 -10   8  167.33    9.28
  -4  10  -8  165.35    8.59
  -4 -10  -8  183.51    7.26
   4  10   8  176.20   10.70
   4 -10   8  168.27   10.18
  -4  10  -9   26.15    3.30
   4 -10   9   23.33    3.81
   4 -10   9   20.98    3.78
  -4  10  -9   23.93    3.48
  -4  10 -10    0.99    1.11
   4 -10  10    1.15    1.59
   4 -10  10    0.89    1.75
  -4  10 -10    1.00    1.55
  -4  10 -11   -2.29    1.34
   4 -10  11    2.85    2.11
  -4  10 -11    0.54    1.56
   4 -10  11    2.23    2.35
   4 -10  12    0.39    1.95
  -4  10 -12    2.56    1.63
  -4  10 -12    6.21    2.06
   4 -10  12    3.40    2.22
   4 -10  13   15.07    3.64
  -4  10 -13   10.86    2.58
  -4  10 -13   15.54    3.40
   4 -10  13   18.93    3.96
   4 -10  14   35.40    5.46
  -4  10 -14   33.64    4.30
  -4  10 -14   31.97    4.68
   4 -10  14   37.98    5.64
   4 -10  15   10.34    3.20
  -4  10 -15    3.14    1.88
  -4  10 -15    8.04    2.65
   4 -10  15   10.13    3.69
   4 -10  16   26.33    4.73
   4 -10  16   24.62    4.85
  -4  10 -16   25.28    4.02
  -4  10 -16   28.02    4.45
   4  12 -13   44.93    5.15
   4  12 -13   36.99    4.78
  -4 -12  13   50.03    6.49
   4  12 -12   -1.68    2.02
   4  12 -12    2.17    1.91
  -4 -12  12    3.13    2.42
  -4  12  12   -1.94    2.30
   4  12 -11   -3.08    2.17
   4  12 -11    0.86    2.04
  -4  12  11   -1.31    2.43
  -4 -12  11   -1.50    1.78
   4  12 -10    7.91    2.51
   4  12 -10    8.88    2.62
  -4  12  10   12.23    3.68
  -4 -12  10    8.97    2.79
   4  12  -9   28.28    3.89
   4  12  -9   21.31    3.49
  -4  12   9   26.35    4.31
   4  12  -8   30.10    4.03
  -4  12   8   38.08    4.91
   4  12  -8   30.31    4.00
   4  12  -7   22.43    3.60
  -4 -12   7   18.60    3.59
  -4  12   7   30.23    4.51
   4  12  -7   20.04    3.29
  -4 -12   6    1.77    1.79
  -4  12   6    4.73    2.10
   4  12  -6    3.83    1.74
   4  12  -5    6.45    2.16
   4  12  -5    4.19    2.15
  -4  12   5    1.81    1.63
  -4 -12   5    2.78    2.31
  -4  12   4  161.23    9.08
  -4 -12   4  151.50    9.53
   4  12  -4  145.98    8.61
   4  12  -3   19.93    3.38
  -4  12   3   26.48    3.74
   4 -12  -2    1.82    2.00
  -4  12   2    3.46    1.97
   4  12  -2   -3.48    1.87
  -4 -12   1    8.75    2.60
   4 -12  -1   11.94    2.77
   4 -12  -1    6.42    1.31
   4  12  -1    6.44    2.22
  -4  12   1    9.86    2.20
  -4 -12   0  191.15   10.14
  -4  12   0  190.99    9.07
   4  12   0  199.04   10.24
   4 -12   0  187.98   10.55
   4 -12   0  175.83    6.93
  -4  12  -1   57.37    4.87
  -4 -12  -1   54.87    5.28
   4  12   1   60.18    5.86
   4 -12   1   54.02    5.73
   4 -12   1   55.65    4.12
  -4  12  -2    1.06    1.48
  -4 -12  -2    0.18    1.30
   4  12   2   -0.03    2.02
   4 -12   2    2.34    2.00
  -4  12  -2    2.32    1.66
   4 -12   2    1.18    1.12
  -4  12  -3    9.87    2.15
   4  12   3    5.33    2.50
  -4 -12  -3    6.92    2.07
   4 -12   3    4.79    2.52
  -4  12  -3   10.11    2.69
   4 -12   3    9.96    2.28
  -4  12  -4   10.10    2.33
   4 -12   4   15.73    3.69
  -4 -12  -4   17.85    2.99
   4  12   4   14.22    3.19
  -4  12  -4   13.35    2.57
   4 -12   4   13.42    2.46
  -4 -12  -5   26.31    3.49
   4  12   5   26.92    4.29
   4 -12   5   28.82    4.55
  -4  12  -5   27.77    3.94
   4 -12   5   26.14    3.61
  -4  12  -5   30.90    3.67
  -4 -12  -6    1.42    1.42
   4  12   6    3.84    2.75
   4 -12   6    2.69    2.89
  -4  12  -6   -0.52    1.32
   4 -12   6    3.25    1.95
  -4  12  -6    1.53    1.38
   4 -12   7    8.78    3.22
  -4 -12  -7    7.89    2.06
  -4  12  -7    4.53    2.00
   4 -12   7    6.96    2.34
  -4  12  -7    7.88    2.09
   4 -12   8    4.82    2.56
   4  12   8    3.76    2.48
  -4  12  -8    3.80    1.75
   4 -12   8    7.45    2.36
  -4  12  -8    5.50    2.05
   4  12   9    4.40    3.03
   4 -12   9    0.41    2.12
  -4  12  -9    1.41    1.45
  -4  12  -9    4.08    2.07
   4 -12   9   -1.08    1.78
  -4  12 -10    2.98    1.67
   4 -12  10   -0.02    1.88
   4  12  10   -1.01    3.24
   4 -12  10    0.95    1.77
  -4  12 -10    2.47    1.63
  -4  12 -11   -0.51    1.50
   4 -12  11    1.08    1.84
   4  12  11    1.91    2.11
  -4  12 -11    2.54    2.35
   4 -12  11    2.77    2.44
   4  12  12   14.46    4.26
   4 -12  12    9.60    3.60
   4 -12  12   13.30    3.93
  -4  12 -12    8.35    2.49
  -4  12 -12   16.87    3.46
  -4 -14   8    4.72    2.50
  -4  14   8    4.15    2.41
   4  14  -8    2.40    1.84
   4  14  -8    5.14    2.18
   4  14  -7    4.47    2.46
  -4 -14   7    5.03    2.89
  -4  14   7    3.04    2.38
   4  14  -7    4.07    2.02
   4  14  -6    1.59    2.14
  -4 -14   6    0.63    2.26
  -4  14   6    2.06    1.78
   4  14  -6    4.76    2.02
   4  14  -5    5.78    2.26
   4  14  -5    3.46    2.01
  -4  14   5    7.88    2.35
   4  14  -4   50.40    5.64
  -4 -14   4   49.51    6.34
  -4  14   4   56.45    5.82
   4  14  -4   47.89    5.42
  -4 -14   3   22.17    4.26
  -4  14   3   31.92    4.42
   4  14  -3   22.17    3.74
  -4 -14   2   -0.40    1.90
  -4  14   2   -0.06    1.70
   4  14  -2    0.63    1.71
  -4 -14   1    8.42    2.93
   4  14  -1   11.76    3.06
  -4  14   1    8.16    2.32
  -4  14   0    1.83    1.48
  -4 -14   0    3.21    2.16
   4 -14   0    1.20    1.87
   4  14   0   -1.96    1.99
  -4  14   0   -1.53    1.75
  -4  14  -1   13.10    3.00
   4 -14   1    9.47    3.23
  -4 -14  -1    9.85    2.85
  -4  14  -1    9.03    2.52
   4  14   1   13.71    3.45
  -4  14  -2    5.49    2.28
  -4 -14  -2    8.13    2.83
   4 -14   2    8.49    3.15
  -4  14  -2   12.92    2.78
   4  14   2    7.20    2.47
  -4  14  -3   20.23    3.65
   4 -14   3   21.62    4.53
  -4 -14  -3   24.60    3.92
   4  14   3   27.93    4.64
  -4  14  -3   20.06    3.38
  -4  14  -4   54.36    5.81
  -4  14  -4   52.30    5.11
   4 -14   4   51.05    6.49
  -4 -14  -4   47.20    5.22
   4  14   4   65.85    6.90
  -4  14  -5    6.39    2.18
  -4  14  -5    8.97    2.69
   4  14   5    8.60    3.36
  -4 -14  -5    7.26    2.59
   4 -14   5   10.43    3.65
  -4  14  -6   23.27    3.60
  -4  14  -6   23.43    3.88
   4 -14   6   25.24    5.17
   4  14   6   26.30    4.70
   5  -1 -23   26.76    5.23
   5   1 -23   30.26    4.95
   5   1 -23   31.72    4.90
   5  -1 -22    2.09    2.09
   5   1 -22   -0.04    1.81
   5   1 -22    3.21    2.32
   5  -1 -21    9.51    2.90
   5   1 -21    8.61    2.77
   5   1 -21   12.43    3.32
   5   1 -20   16.90    3.47
   5  -1 -20   14.29    3.43
   5   1 -20   22.13    3.77
   5   1 -19   18.53    3.20
   5  -1 -19   13.29    3.17
  -5  -1  19   16.62    2.28
   5   1 -19   21.34    3.66
   5  -1 -18    5.26    1.93
   5   1 -18    7.73    2.28
   5   1 -18    6.29    2.31
  -5   1  18    5.50    1.13
  -5  -1  18    3.17    1.27
  -5   1  17   64.59    3.37
  -5  -1  17   70.91    4.32
   5   1 -17   72.86    5.79
   5  -1 -17   73.98    5.82
   5   1 -17   61.35    5.08
   5  -1 -17   73.56    6.02
  -5  -1  16  259.14    8.47
  -5   1  16  259.27    7.18
   5   1 -16  266.77   10.88
   5  -1 -16  260.05   10.67
   5   1 -16  281.62   10.45
   5  -1 -16  276.98   11.05
  -5  -1  15   93.92    4.74
  -5   1  15   87.63    3.82
   5  -1 -15  100.23    6.14
   5   1 -15   93.29    6.09
   5  -1 -15  100.77    6.26
   5   1 -15   87.96    5.44
  -5   1  15   80.88    4.83
  -5   1  14   17.40    1.61
  -5  -1  14   17.29    2.01
  -5   1  14   15.43    2.17
   5   1 -14   17.45    2.44
   5  -1 -14   20.58    2.82
   5   1 -14   20.19    2.83
   5  -1 -14   15.20    2.47
  -5  -1  14   17.69    2.11
  -5   1  14   18.47    2.28
  -5  -1  13   26.50    2.34
  -5   1  13   24.69    1.84
   5  -1 -13   24.50    2.85
  -5  -1  13   22.56    2.71
  -5   1  13   26.86    2.71
   5  -1 -13   27.30    3.01
   5   1 -13   24.23    3.10
   5   1 -13   28.03    2.73
  -5   1  13   23.36    2.38
  -5  -1  13   26.77    2.47
  -5  -1  12    2.35    0.91
  -5   1  12    1.68    0.50
   5  -1 -12    2.21    1.08
  -5  -1  12    0.61    0.97
  -5   1  12    2.18    0.99
  -5  -1  12    1.51    0.91
  -5   1  12    0.62    0.78
   5  -1 -12    0.85    0.96
   5   1 -12    1.21    1.10
   5   1 -12    0.46    0.88
  -5  -1  12    2.11    0.96
  -5   1  12    2.21    0.97
  -5   1  11  354.33    7.84
  -5  -1  11  356.95    9.09
   5  -1 -11  349.52   10.00
  -5   1  11  368.70    9.83
  -5  -1  11  360.16   10.42
  -5  -1  11  352.62   10.05
  -5   1  11  361.37   10.21
   5   1 -11  368.82   10.69
   5  -1 -11  361.64   10.49
  -5  -1  11  355.45    9.02
   5   1 -11  354.47    9.44
  -5   1  11  377.14    9.26
  -5   1  10    6.24    0.88
  -5  -1  10    4.34    1.02
   5  -1 -10    5.72    1.23
  -5   1  10    6.37    1.18
  -5  -1  10    5.98    1.13
  -5  -1  10    4.13    1.17
   5  -1 -10    7.53    1.55
  -5   1  10    4.93    1.17
   5   1 -10    7.19    1.58
   5   1 -10    6.29    1.23
  -5  -1  10    6.72    1.08
  -5   1  10    4.66    0.95
  -5   1   9   67.19    2.73
  -5  -1   9   61.28    3.13
   5  -1  -9   68.38    3.69
  -5  -1   9   63.72    3.67
  -5   1   9   65.48    3.40
  -5  -1   9   62.58    3.58
  -5   1   9   68.91    3.70
   5   1  -9   64.37    3.82
   5  -1  -9   64.95    3.75
  -5   1   9   69.80    3.21
  -5  -1   9   63.64    3.02
   5   1  -9   63.32    3.19
  -5  -1   8  406.27    8.92
   5  -1  -8  378.06    9.00
  -5  -1   8  394.37    9.69
  -5   1   8  380.12    8.93
  -5  -1   8  398.22    9.49
   5   1  -8  380.66    9.62
  -5   1   8  399.45    9.41
   5  -1  -8  372.09    9.34
  -5  -1   8  380.05    8.10
  -5   1   8  374.28    8.23
  -5  -1   7  197.10    5.67
   5  -1  -7  206.24    5.80
  -5   1   7  212.89    5.94
  -5  -1   7  215.46    6.38
   5   1  -7  183.40    6.09
  -5  -1   7  205.84    6.11
  -5   1   7  222.93    6.22
  -5  -1   7  202.43    5.11
   5  -1  -7  213.19    6.20
  -5   1   7  216.33    5.33
   5   1  -7  211.21    5.29
  -5  -1   6  221.08    5.82
   5  -1  -6  221.68    5.59
   5  -1  -6  223.41    5.71
  -5  -1   6  223.22    6.25
   5   1  -6  214.91    5.98
  -5  -1   6  213.98    5.86
   5  -1  -6  220.85    6.00
  -5  -1   6  220.94    4.96
  -5   1   6  223.84    5.93
  -5   1   6  222.76    5.11
   5   1  -6  215.95    5.02
  -5  -1   5    5.80    0.80
   5  -1  -5    7.16    0.89
  -5   1   5    6.86    0.72
   5   1  -5    7.19    0.75
  -5  -1   5    7.17    0.97
   5   1  -5    7.35    0.99
   5  -1  -5    6.41    0.96
  -5  -1   5    8.19    0.78
  -5   1   5    5.91    0.80
   5   1  -5    6.37    1.01
  -5  -1   5    8.45    1.16
  -5   1   5    5.64    0.85
   5  -1  -5    7.12    0.94
  -5  -1   4    8.00    1.05
   5   1  -4    9.96    1.02
  -5   1   4    8.07    0.71
   5  -1  -4    8.73    0.80
  -5   1   4    8.36    0.89
   5   1  -4   10.48    0.75
  -5  -1   4    9.89    0.73
   5  -1  -4    9.44    0.96
  -5   1   4    7.63    0.95
   5  -1  -4    8.30    1.00
   5   1  -4    8.11    1.05
  -5   1   3   64.70    2.57
  -5   1   3   62.41    1.88
  -5  -1   3   66.59    2.49
   5   1  -3   67.26    2.41
  -5   1   3   63.90    2.06
   5  -1  -3   65.24    2.07
   5   1  -3   65.68    1.80
   5  -1  -3   63.20    2.50
  -5  -1   3   68.17    2.77
   5   1  -3   67.76    2.77
   5  -1  -2   91.69    3.04
  -5   1   2   89.94    3.09
  -5  -1   2   91.47    2.87
   5   1  -2   92.41    2.78
  -5   1   2   94.75    2.11
   5  -1  -2   94.03    2.14
  -5  -1   2   88.45    3.18
   5   1  -2   90.03    3.14
  -5   1   1    0.17    0.27
  -5  -1   1    0.13    0.46
   5   1  -1    0.02    0.42
   5   1  -1    0.19    0.47
   5   1  -1   -0.21    0.53
  -5  -1   1   -0.23    0.50
   5  -1  -1    0.73    0.68
  -5   1   1    0.10    0.50
   5  -1   0    0.92    0.35
  -5   1   0    1.33    0.44
   5   1   0    2.05    0.69
  -5  -1   0    0.96    0.52
  -5   1   0    1.92    0.69
   5  -1   0    0.75    0.64
   5   1   0    1.82    0.66
   5   1   0    0.92    0.51
  -5  -1   0    1.26    0.58
  -5   1  -1   19.30    1.21
   5  -1   1   19.57    1.18
   5  -1   1   18.51    0.79
   5   1   1   16.28    1.21
  -5   1  -1   18.89    1.57
  -5  -1  -1   14.47    1.32
  -5   1  -1   17.65    0.79
  -5  -1  -1   16.87    1.40
   5   1   1   15.16    1.27
   5  -1   1   19.83    1.63
   5  -1   2   31.18    1.64
  -5   1  -2   29.93    1.69
  -5  -1  -2   34.72    2.09
  -5   1  -2   27.66    2.02
   5  -1   2   32.21    2.16
   5  -1   2   29.18    1.31
  -5   1  -2   27.54    1.30
  -5  -1  -2   30.96    1.96
   5   1   2   35.77    2.05
  -5   1  -3    5.50    0.92
   5  -1   3    5.15    0.82
  -5   1  -3    5.39    0.96
   5   1   3    6.80    1.00
  -5  -1  -3    4.98    1.04
  -5   1  -3    4.62    0.99
  -5   1  -3    4.80    0.77
   5  -1   3    5.50    0.72
   5  -1   3    5.23    1.06
   5   1   3    5.74    0.99
  -5  -1  -3    8.18    1.16
   5  -1   4   36.78    2.20
  -5   1  -4   33.33    2.15
   5   1   4   34.71    2.24
  -5   1  -4   33.22    2.19
  -5  -1  -4   35.97    2.42
   5  -1   4   31.26    2.41
  -5  -1  -4   33.78    2.26
   5  -1   4   33.01    1.88
  -5   1  -4   32.12    1.88
   5   1   4   32.95    2.28
  -5   1  -5  123.62    4.44
   5  -1   5  125.79    5.20
   5   1   5  121.65    4.73
  -5  -1  -5  125.59    4.95
   5  -1   5  118.05    4.05
  -5   1  -5  124.00    4.17
   5   1   5  126.90    4.56
   5   1   5  123.11    4.61
  -5   1  -5  126.34    4.58
   5  -1   5  121.33    4.41
  -5   1  -6  194.72    5.84
  -5  -1  -6  190.65    4.77
   5  -1   6  189.95    6.89
  -5  -1  -6  180.84    6.58
   5   1   6  191.11    6.33
   5  -1   6  185.31    5.75
  -5   1  -6  189.28    5.71
   5   1   6  178.27    5.88
  -5   1  -6  187.77    6.27
   5   1   6  179.39    6.01
   5  -1   6  170.37    5.76
  -5   1  -7   62.33    3.22
  -5  -1  -7   69.61    2.66
   5  -1   7   62.57    3.45
  -5  -1  -7   57.81    3.69
  -5   1  -7   60.13    3.69
   5   1   7   67.48    3.70
   5  -1   7   68.57    3.71
   5   1   7   66.77    3.68
  -5   1  -7   62.78    3.45
   5  -1   7   68.14    4.14
   5   1   7   69.96    3.94
   5  -1   8   59.54    4.07
   5   1   8   54.26    3.62
  -5   1  -8   56.16    3.14
  -5  -1  -8   56.31    2.42
   5  -1   8   52.77    3.33
  -5   1  -8   59.87    3.56
   5   1   8   57.04    3.54
   5   1   8   58.06    3.62
  -5   1  -8   56.99    3.74
  -5  -1  -8   50.64    3.68
   5  -1   8   55.20    3.48
  -5  -1  -9  609.69   15.09
   5   1   9  592.65   14.58
   5  -1   9  585.16   15.38
  -5   1  -9  619.54   12.85
  -5  -1  -9  622.31   10.96
   5  -1   9  597.01   13.68
  -5   1  -9  606.86   13.95
   5   1   9  584.24   13.97
   5  -1   9  622.43   13.97
   5   1   9  623.16   14.24
  -5   1  -9  614.18   14.68
   5   1  10  153.54    6.86
  -5  -1 -10  158.23    7.23
  -5   1 -10  149.60    5.57
  -5  -1 -10  153.15    4.29
   5  -1  10  147.37    6.28
   5   1  10  151.95    6.53
  -5   1 -10  159.82    6.59
   5   1  10  163.96    6.67
  -5   1 -10  158.22    6.88
   5  -1  10  152.52    6.32
   5  -1  11    9.16    1.89
   5   1  11    9.58    1.86
  -5   1 -11   11.44    1.99
  -5  -1 -11   12.88    2.26
  -5   1 -11    9.69    2.01
   5   1  11   12.59    2.14
  -5  -1 -11   12.02    1.18
  -5   1 -11   10.66    1.47
  -5   1 -12    0.64    1.17
  -5   1 -12    0.36    1.17
   5   1  12   -1.04    1.30
   5  -1  12   -1.65    1.24
  -5  -1 -12   -0.23    1.28
  -5   1 -12   -0.15    0.74
  -5  -1 -12    0.50    0.47
  -5   1 -13   -0.32    1.06
  -5   1 -13   -0.82    0.99
   5   1  13   -0.02    1.21
  -5  -1 -13    0.16    1.20
   5  -1  13   -1.40    1.72
  -5   1 -13    1.27    0.73
  -5  -1 -13    0.68    0.49
  -5   1 -14    6.03    1.95
   5  -1  14    7.06    2.15
  -5  -1 -14    6.32    2.54
  -5   1 -14    9.64    1.53
  -5  -1 -14    7.82    0.97
  -5   1 -14    7.15    1.94
   5   1  14    5.82    1.97
  -5  -1 -15   12.80    2.90
  -5   1 -15   11.39    2.63
   5  -1  15    9.57    2.56
  -5   1 -15    9.57    1.52
  -5   1 -15    7.78    2.11
   5   1  15   12.31    2.48
  -5  -1 -16  108.25    7.82
   5   1  16   95.37    6.83
   5  -1  16   89.40    6.98
  -5   1 -16   83.01    4.33
  -5   1 -16   98.67    7.12
  -5  -1 -17  556.41   19.24
   5  -1  17  519.21   18.35
   5   1  17  527.66   17.37
  -5   1 -18   93.78    7.63
  -5  -1 -18   98.34    8.11
   5  -1  18   91.96    7.52
   5   1  18   86.51    6.93
   5   1  19   11.51    2.73
  -5   1 -19   13.28    3.01
  -5  -1 -19   13.20    3.66
   5  -1  19    8.78    2.44
   5   1  20    2.80    1.64
   5  -1  20    2.47    2.00
  -5   1 -20   -2.34    1.98
  -5  -1 -20   -0.06    2.15
   5   1  21   24.98    4.39
   5  -1  21   25.87    4.60
  -5   1 -21   27.73    4.94
  -5  -1 -21   23.30    5.08
   5   3 -22    4.23    2.26
   5  -3 -22    0.17    2.05
   5   3 -22    1.22    2.35
   5  -3 -21   18.26    4.33
   5   3 -21   16.66    3.30
   5   3 -21   16.86    3.49
   5   3 -20    0.65    1.46
   5  -3 -20    6.23    2.89
  -5  -3  20    3.10    1.54
   5   3 -20    5.89    2.52
   5   3 -19    2.32    1.56
   5  -3 -19    0.58    2.04
  -5  -3  19    0.66    1.30
   5   3 -19    2.14    1.76
   5   3 -18    5.31    1.80
   5  -3 -18    6.31    2.47
   5   3 -18    6.11    2.35
  -5  -3  18    5.29    1.66
   5  -3 -17    7.78    2.48
   5   3 -17    4.53    1.93
   5   3 -17    9.94    2.69
  -5  -3  17    5.30    1.55
  -5  -3  16   31.10    3.26
  -5   3  16   33.13    3.35
   5  -3 -16   28.25    4.12
   5   3 -16   35.37    4.17
   5   3 -16   30.08    3.26
  -5  -3  15    4.43    1.59
  -5   3  15    3.49    0.50
  -5   3  15    2.05    1.02
   5  -3 -15    2.59    2.06
   5   3 -15    3.84    1.89
   5   3 -15    3.54    1.67
  -5  -3  14   28.71    2.96
  -5   3  14   30.62    1.44
  -5   3  14   33.27    2.95
   5  -3 -14   30.87    3.68
   5   3 -14   31.41    3.51
   5   3 -14   28.86    3.01
  -5   3  14   26.22    2.81
  -5   3  13    1.56    0.46
  -5  -3  13    2.46    1.22
   5  -3 -13    3.63    1.75
  -5   3  13    1.56    0.95
   5   3 -13    2.29    1.29
   5   3 -13    2.38    1.12
  -5  -3  13    0.81    0.87
  -5   3  13    1.86    1.02
  -5   3  12   80.67    2.68
  -5  -3  12   82.31    4.64
   5  -3 -12   81.63    5.53
  -5   3  12   80.21    4.16
   5   3 -12   82.65    5.02
  -5   3  12   75.01    4.86
  -5  -3  12   81.11    4.36
   5   3 -12   74.68    4.32
  -5   3  12   79.69    4.54
  -5  -3  11    5.72    1.26
   5  -3 -11    5.33    1.43
  -5   3  11    6.30    1.34
  -5  -3  11    6.34    1.59
  -5   3  11    7.50    1.31
  -5  -3  11    5.81    1.48
   5   3 -11    4.97    1.31
  -5   3  11   10.61    1.86
  -5  -3  11    7.88    1.39
   5   3 -11    6.03    1.29
   5   3 -10  123.20    5.31
  -5  -3  10  123.65    5.50
   5  -3 -10  123.43    5.96
  -5  -3  10  118.71    5.89
  -5   3  10  118.08    4.54
   5   3 -10  115.30    5.50
  -5  -3  10  114.43    5.60
  -5   3  10  121.63    5.49
  -5  -3  10  118.74    4.87
   5   3 -10  126.05    5.10
  -5   3  10  116.81    5.16
   5   3  -9   38.69    2.87
  -5  -3   9   36.46    2.90
   5  -3  -9   29.87    2.94
  -5  -3   9   39.15    3.15
  -5   3   9   37.90    2.34
   5   3  -9   30.60    2.71
  -5  -3   9   39.31    3.03
  -5   3   9   44.24    3.12
  -5  -3   9   34.78    2.45
   5   3  -9   36.39    2.55
  -5   3   9   36.48    2.76
  -5  -3   8  427.17   10.68
   5   3  -8  424.10   10.38
  -5   3   8  417.87   10.18
   5  -3  -8  423.25   10.82
  -5  -3   8  437.26   11.00
  -5   3   8  417.13    8.87
  -5  -3   8  419.96   10.50
  -5  -3   8  395.10    9.36
  -5   3   8  418.83   10.27
   5   3  -8  422.41    9.45
  -5   3   7 1723.15   27.73
   5   3  -7 1711.60   27.83
  -5  -3   7 1704.25   28.19
  -5  -3   7 1726.09   28.07
   5   3  -7 1692.05   27.73
   5   3  -7 1677.06   26.38
  -5   3   7 1757.31   27.40
  -5   3   7 1731.34   25.68
  -5   3   6  387.79    9.64
   5   3  -6  405.70    9.70
  -5  -3   6  403.52    9.93
  -5  -3   6  408.70    9.80
   5   3  -6  415.64    9.70
  -5   3   6  406.88    9.18
   5   3  -6  392.12    8.60
  -5  -3   6  413.43    9.92
   5  -3  -6  415.28    7.94
  -5   3   6  405.51    8.20
   5  -3  -5   50.36    2.10
  -5  -3   5   52.56    2.96
  -5  -3   5   55.54    3.15
   5   3  -5   56.94    3.09
  -5   3   5   49.57    2.95
  -5  -3   5   49.31    3.00
   5   3  -5   45.13    2.73
  -5   3   5   45.96    2.49
   5   3  -5   53.33    2.55
  -5   3   5   48.69    2.22
   5   3  -4  563.27   11.47
  -5  -3   4  548.53   11.61
   5   3  -4  556.25   11.43
  -5  -3   4  541.90   11.52
  -5  -3   4  546.48   11.18
   5  -3  -4  544.55    9.58
  -5   3   4  552.18    9.90
   5   3  -3   74.19    3.34
  -5  -3   3   67.34    3.28
   5   3  -3   73.24    3.37
   5   3  -3   72.74    3.13
  -5  -3   3   70.24    3.12
  -5  -3   3   71.03    3.46
  -5   3   3   74.51    2.75
   5  -3  -3   79.81    2.70
  -5  -3   2   33.75    2.43
  -5   3   2   35.90    2.38
   5   3  -2   32.27    2.24
  -5  -3   2   39.11    2.43
  -5  -3   2   39.62    2.21
   5   3  -2   36.46    2.02
   5  -3  -2   36.52    1.94
  -5   3   2   36.09    1.95
  -5   3   1  103.05    4.19
  -5  -3   1  108.60    4.62
  -5   3   1  104.94    3.20
   5   3  -1  106.53    4.19
  -5  -3   1  102.02    3.78
  -5   3   1  103.87    3.61
   5  -3  -1   99.36    3.57
  -5  -3   1  107.92    3.65
   5   3  -1  108.69    3.52
   5   3   0  886.92   14.51
  -5  -3   0  881.41   15.06
  -5   3   0  875.34   16.30
  -5   3   0  889.93   13.67
   5  -3   0  866.75   14.29
  -5   3   0  884.51   15.38
  -5   3   0  873.61   14.69
  -5  -3   0  874.47   14.64
   5  -3   0  893.09   15.41
   5   3   1  113.19    3.51
  -5  -3  -1  115.35    3.71
  -5   3  -1  111.56    4.58
   5  -3   1  115.08    3.33
   5   3   1  111.03    4.77
   5   3   1  110.55    4.67
   5  -3   1  111.04    4.23
  -5   3  -1  121.35    3.13
  -5   3  -1  116.84    3.82
  -5  -3  -1  113.93    3.62
  -5  -3  -2  794.16   13.26
   5  -3   2  805.57   15.75
   5  -3   2  786.33   13.03
  -5   3  -2  783.78   15.57
   5   3   2  805.41   15.92
   5  -3   2  777.82   15.20
  -5   3  -2  792.67   12.83
   5  -3   2  814.54   14.27
  -5   3  -2  807.74   14.18
  -5  -3  -2  796.14   13.62
   5   3   2  798.11   13.43
  -5   3  -3   17.94    1.95
  -5  -3  -3   17.89    1.26
   5  -3   3   17.88    1.98
  -5  -3  -3   18.23    2.12
   5  -3   3   18.50    2.01
   5   3   3   17.96    2.05
   5  -3   3   16.09    1.28
  -5   3  -3   19.58    1.37
  -5   3  -3   18.62    1.68
   5  -3   3   16.86    1.62
  -5  -3  -3   16.75    1.45
   5   3   3   17.77    1.45
  -5  -3  -4    2.56    0.77
   5   3   4    2.06    0.74
  -5  -3  -4    2.20    0.49
   5  -3   4    1.55    0.89
   5   3   4    1.81    0.93
  -5  -3  -4    1.99    1.07
   5  -3   4    0.53    0.78
   5  -3   4    1.53    0.70
  -5   3  -4    1.37    0.70
   5  -3   4    2.72    0.94
  -5   3  -4    1.19    0.70
   5   3   5   55.31    2.84
  -5  -3  -5   53.15    1.95
  -5   3  -5   46.06    3.23
   5  -3   5   54.81    3.55
  -5  -3  -5   52.42    2.76
   5  -3   5   50.52    3.63
  -5  -3  -5   52.42    3.85
   5   3   5   48.14    3.32
   5  -3   5   48.46    2.57
  -5   3  -5   50.04    2.69
   5  -3   5   56.50    3.13
  -5   3  -5   48.09    2.93
   5   3   6  346.02    8.46
  -5  -3  -6  359.37    6.25
  -5   3  -6  351.65    9.74
   5  -3   6  340.62    9.85
   5   3   6  356.87    9.99
  -5  -3  -6  339.86   11.02
  -5   3  -6  343.86    8.40
   5  -3   6  344.58    8.40
   5  -3   6  339.63    9.07
  -5   3  -6  352.94    9.20
   5   3   7  119.52    4.81
  -5  -3  -7  119.74    2.68
  -5   3  -7  121.45    5.42
   5  -3   7  120.19    5.61
  -5  -3  -7  103.87    6.08
   5  -3   7  115.57    4.64
   5  -3   7  115.49    5.03
  -5   3  -7  112.78    4.66
  -5   3  -7  111.90    5.15
   5   3   8   10.78    1.57
  -5   3  -8   11.42    1.79
   5  -3   8    9.43    1.71
  -5  -3  -8    9.73    2.04
   5   3   8   11.48    1.89
   5  -3   8   11.60    1.61
  -5   3  -8    7.29    1.40
   5   3   8   10.28    1.67
   5  -3   8    9.22    1.61
  -5   3  -8    6.70    1.50
   5   3   9    2.00    0.89
  -5   3  -9    2.50    1.02
   5  -3   9    1.08    0.93
  -5  -3  -9    1.31    1.41
   5   3   9    0.13    0.83
   5  -3   9    0.88    0.64
   5   3   9    1.61    1.00
  -5   3  -9   -2.17    0.95
   5  -3   9    1.52    1.15
  -5   3  -9    3.33    1.04
  -5   3 -10   34.13    3.03
   5  -3  10   40.83    3.43
  -5  -3 -10   33.64    3.72
   5   3  10   36.34    3.09
   5  -3  10   34.14    3.02
  -5   3 -10   35.65    3.08
   5   3  10   37.70    3.51
   5   3  10   28.52    3.04
  -5   3 -10   36.50    3.30
   5   3  11   16.88    2.19
  -5   3 -11   17.69    2.25
   5  -3  11   19.77    2.63
  -5  -3 -11   15.29    3.05
   5  -3  11   16.47    2.25
  -5   3 -11   15.81    2.34
  -5   3 -11   16.05    2.44
   5  -3  12   50.63    4.04
  -5   3 -12   42.26    3.44
   5   3  12   56.61    4.21
  -5  -3 -12   46.77    4.91
  -5   3 -12   48.39    4.08
  -5   3 -12   47.50    4.09
   5   3  13   17.49    2.61
   5  -3  13   16.14    2.47
  -5   3 -13   14.12    2.13
  -5  -3 -13   15.87    3.25
  -5   3 -13   16.46    2.65
  -5   3 -13   13.65    2.36
   5  -3  14  167.80    7.78
   5   3  14  188.76    8.40
  -5  -3 -14  175.70   10.03
  -5   3 -14  166.30    8.13
  -5   3 -14  180.49    8.76
  -5  -3 -15   47.93    5.50
   5   3  15   53.25    4.57
  -5   3 -15   46.09    3.75
  -5   3 -15   56.15    4.80
  -5   3 -15   52.60    4.95
  -5   3 -16   57.11    5.09
  -5   3 -16   48.49    5.17
   5   3  16   58.38    5.00
  -5  -3 -16   51.92    5.91
   5  -3  16   54.70    5.60
   5  -3  17    1.28    1.64
  -5   3 -17    3.41    1.83
  -5  -3 -17    3.85    1.90
   5   3  17    2.98    1.74
  -5   3 -17    2.64    1.33
  -5   3 -18    2.23    1.88
  -5  -3 -18    2.03    2.21
   5  -3  18   -1.17    1.76
   5   3  18   -0.77    1.96
  -5   3 -18    3.66    1.86
  -5  -3 -19    0.87    1.96
  -5   3 -19   -3.36    1.99
   5  -3  19   -1.49    2.04
   5   3  19    0.83    1.64
  -5   3 -19   -1.96    1.62
  -5   3 -20   -0.24    1.99
   5  -3  20   -0.94    1.95
   5   3  20    1.93    1.78
  -5   3 -20    0.14    1.74
  -5  -3 -21   46.31    6.92
  -5   3 -21   48.11    5.96
   5   3  21   42.93    5.22
   5  -3  21   46.81    6.19
   5  -5 -21   -1.81    2.64
   5   5 -21    0.37    1.90
  -5  -5  21    0.51    1.40
   5  -5 -20    1.45    1.90
   5   5 -20   -0.92    1.78
   5   5 -20    4.57    2.22
  -5  -5  20    1.34    1.64
  -5  -5  19   57.98    5.38
   5  -5 -19   67.47    6.89
   5   5 -19   50.26    5.57
   5   5 -19   58.61    5.50
   5  -5 -18    0.74    1.89
  -5  -5  18   -0.12    1.10
   5   5 -18    0.69    1.44
   5   5 -18    2.88    1.49
   5  -5 -17    2.69    2.21
  -5  -5  17    3.21    1.70
   5   5 -17    0.04    1.54
   5   5 -17    2.72    1.55
   5   5 -16   23.76    3.17
  -5  -5  16   24.32    3.49
  -5   5  16   24.75    2.71
   5   5 -16   26.69    3.63
   5  -5 -16   27.20    4.04
   5   5 -15  575.83   17.44
  -5   5  15  574.05   14.01
   5   5 -15  594.23   15.97
  -5  -5  15  601.82   17.01
  -5   5  14   24.60    2.43
  -5  -5  14   21.83    2.98
   5   5 -14   18.01    3.08
   5   5 -14   21.18    2.86
  -5  -5  13  146.94    7.48
   5   5 -13  145.47    7.39
  -5   5  13  137.40    5.44
   5   5 -13  149.37    6.81
  -5   5  12   22.97    1.26
  -5  -5  12   21.46    2.75
  -5   5  12   17.43    2.47
  -5   5  12   17.08    1.83
   5   5 -12   19.24    2.42
  -5  -5  11  312.37   10.78
  -5   5  11  342.02    6.93
  -5   5  11  329.37   10.82
   5   5 -11  285.76   10.41
   5   5 -11  299.26    9.44
  -5   5  11  321.77    7.96
  -5   5  10    0.85    0.61
  -5  -5  10    0.70    1.09
   5   5 -10    0.36    0.76
  -5   5  10    0.29    0.53
  -5   5  10    0.28    0.90
   5   5 -10    2.48    1.42
  -5   5  10    1.08    0.88
   5   5 -10    0.78    0.79
  -5  -5   9   11.02    1.95
  -5   5   9    8.40    1.10
   5   5  -9    9.32    1.72
  -5  -5   9    7.54    1.64
  -5   5   9   11.32    1.23
  -5   5   9    6.23    1.71
   5   5  -9   12.84    2.02
  -5  -5   9    9.08    1.79
  -5   5   9    8.79    1.64
   5   5  -9    9.09    1.74
  -5  -5   8  137.25    6.25
  -5  -5   8  132.35    6.25
   5   5  -8  128.00    5.97
  -5   5   8  125.75    4.46
  -5   5   8  123.99    6.13
  -5  -5   8  133.57    6.16
   5   5  -8  135.16    5.94
   5   5  -8  121.04    5.35
  -5   5   8  125.41    5.55
  -5   5   8  122.58    3.81
  -5  -5   7  244.95    8.17
  -5   5   7  229.02    6.52
  -5  -5   7  240.55    8.50
   5   5  -7  239.06    8.16
  -5  -5   7  238.84    8.34
  -5   5   7  224.44    8.38
   5   5  -7  246.15    8.01
   5   5  -7  242.00    7.50
  -5   5   7  221.34    5.20
   5  -5  -6   14.54    1.03
  -5  -5   6   15.67    1.91
   5   5  -6   15.13    1.97
  -5  -5   6   18.08    2.24
  -5   5   6   12.65    1.52
  -5   5   6   12.43    2.09
   5   5  -6   14.99    1.95
  -5  -5   6   15.87    2.14
   5   5  -6   15.89    1.88
  -5   5   6   15.67    1.14
   5   5  -5    5.07    1.24
  -5  -5   5    6.44    1.43
  -5   5   5    4.56    1.06
  -5  -5   5    5.38    1.42
   5   5  -5    6.21    1.38
   5  -5  -5    5.47    0.66
  -5  -5   5    5.26    1.19
  -5   5   5    5.51    0.67
   5   5  -4   34.03    2.73
  -5   5   4   35.41    2.58
  -5  -5   4   32.32    2.85
  -5  -5   4   39.59    3.27
  -5   5   4   34.42    1.70
   5   5  -4   30.14    2.66
  -5  -5   4   35.22    2.53
   5  -5  -4   33.87    1.64
  -5  -5   3  555.18   13.72
   5   5  -3  553.26   12.62
   5   5  -3  545.02   12.32
  -5  -5   3  539.02   12.68
  -5   5   3  543.28   12.20
  -5   5   3  545.73    9.85
  -5  -5   3  536.98   11.45
   5  -5  -3  533.03    9.83
   5   5  -2  374.97    9.99
  -5  -5   2  373.69   10.93
  -5   5   2  370.23    9.23
  -5  -5   2  364.75    8.50
   5  -5  -2  353.16    7.79
  -5   5   2  347.88    9.50
   5   5  -2  354.62    9.22
  -5  -5   2  369.06    9.66
   5   5  -1    7.18    1.58
  -5  -5   1    4.94    1.45
  -5   5   1    6.51    1.18
   5  -5  -1    4.05    1.29
   5   5  -1    6.11    1.21
  -5  -5   1    5.20    1.12
  -5  -5   1    7.86    1.16
   5   5  -1    5.39    0.87
   5  -5  -1    5.19    0.88
   5  -5   0  474.90   10.35
   5   5   0  442.61   10.21
  -5  -5   0  453.90   10.66
  -5   5   0  458.54   11.56
   5   5   0  450.66    8.97
  -5  -5   0  470.93    9.46
   5   5   0  485.63   12.24
  -5   5   0  460.03    9.93
   5  -5   0  452.86   11.85
   5   5   1 1094.46   17.31
  -5  -5  -1 1116.94   19.44
  -5   5  -1 1123.14   21.30
   5   5   1 1095.19   19.07
   5  -5   1 1116.35   21.79
   5  -5   1 1115.19   19.94
   5   5   1 1106.30   22.16
  -5   5  -1 1026.63   18.31
   5  -5   1 1105.86   19.83
  -5   5  -1 1122.18   19.73
  -5  -5  -1 1135.88   18.00
  -5   5  -2   37.16    3.16
  -5  -5  -2   39.81    2.55
   5  -5   2   41.95    2.74
   5  -5   2   42.80    3.46
   5   5   2   44.66    3.70
   5  -5   2   38.01    2.96
   5   5   2   42.36    3.46
  -5   5  -2   42.62    2.40
  -5   5  -2   42.20    2.85
  -5  -5  -2   40.98    2.15
   5   5   3   58.85    2.36
  -5   5  -3   59.11    3.99
  -5  -5  -3   47.91    2.68
   5  -5   3   58.66    3.21
   5  -5   3   58.41    4.05
   5  -5   3   50.19    3.51
   5   5   3   55.11    4.23
  -5   5  -3   55.94    2.91
  -5   5  -3   51.16    3.18
  -5  -5  -3   59.88    2.55
  -5  -5  -4   17.21    1.54
  -5   5  -4   13.13    2.04
   5  -5   4   20.17    1.95
   5  -5   4   18.40    2.56
   5  -5   4   15.92    2.12
   5   5   4   17.96    2.46
  -5  -5  -4   18.17    1.38
  -5   5  -4   18.65    1.75
  -5   5  -4   20.83    2.13
   5   5   4   17.80    1.31
  -5   5  -5  130.58    6.22
  -5  -5  -5  132.63    4.17
   5  -5   5  124.85    6.38
   5  -5   5  128.87    5.13
  -5  -5  -5  133.91    4.07
   5  -5   5  131.08    6.31
   5   5   5  114.29    6.25
  -5   5  -5  129.26    4.93
  -5   5  -5  130.93    5.50
   5   5   5  132.94    3.97
   5   5   6   23.21    1.69
  -5   5  -6   20.37    2.54
  -5  -5  -6   22.69    1.52
   5  -5   6   16.58    2.55
   5   5   6   23.18    2.84
   5  -5   6   17.74    1.96
  -5   5  -6   16.79    1.86
   5  -5   6   19.29    2.18
  -5   5  -6   18.38    2.13
   5   5   7    4.21    0.85
  -5   5  -7    5.32    1.40
  -5  -5  -7    5.76    0.75
   5  -5   7   10.91    2.11
   5   5   7    5.52    1.71
   5  -5   7    5.77    1.29
  -5   5  -7    6.38    1.32
   5  -5   7    6.84    1.55
  -5   5  -7    7.57    1.52
   5   5   8  132.30    4.77
  -5   5  -8  137.76    6.74
  -5  -5  -8  133.45    3.26
   5  -5   8  131.70    6.93
  -5  -5  -8  139.77    7.65
   5   5   8  128.53    6.91
   5  -5   8  129.01    5.69
  -5   5  -8  130.97    5.68
   5  -5   8  130.95    6.14
  -5   5  -8  134.01    6.12
   5   5   9    5.21    1.08
  -5   5  -9    3.63    1.31
   5  -5   9    2.20    1.35
  -5  -5  -9    5.10    2.02
   5  -5   9    1.01    0.92
  -5   5  -9    1.86    0.95
  -5   5  -9    2.71    1.29
   5  -5  10   42.48    4.03
  -5  -5 -10   57.83    5.30
  -5   5 -10   46.32    3.83
   5  -5  10   47.46    3.67
  -5   5 -10   45.35    4.00
   5   5  10   57.53    3.43
  -5   5 -11  130.56    6.92
  -5  -5 -11  130.25    8.22
   5  -5  11  144.11    7.58
  -5   5 -11  126.65    6.52
   5   5  11  136.33    5.71
  -5   5 -12    3.49    1.59
  -5  -5 -12    2.44    1.97
   5  -5  12    5.50    1.95
  -5   5 -12    2.72    1.26
   5   5  12    5.15    1.50
  -5   5 -13 1621.15   32.05
  -5  -5 -13 1516.33   35.75
   5  -5  13 1596.22   32.61
  -5   5 -13 1560.99   30.96
   5   5  13 1593.27   29.12
  -5   5 -14   26.69    3.67
  -5  -5 -14   29.67    4.61
   5  -5  14   24.65    3.31
  -5   5 -14   28.71    3.46
   5   5  14   26.45    2.97
  -5   5 -15   11.93    2.61
  -5  -5 -15    8.90    3.19
   5  -5  15    9.76    2.35
  -5   5 -15    6.77    2.45
   5   5  15    9.83    2.04
  -5   5 -16   22.79    3.52
   5  -5  16   16.83    3.65
  -5  -5 -16   17.63    3.86
   5  -5  16   21.25    3.18
  -5   5 -16   20.41    3.38
   5   5  16   19.27    2.83
  -5   5 -17  210.78   11.10
  -5   5 -17  228.88   10.92
   5   5  17  215.10    9.59
   5  -5  17  219.96   12.47
  -5  -5 -17  246.84   13.82
  -5   5 -18    4.84    2.04
  -5   5 -18    4.10    2.15
   5   5  18    5.88    2.22
  -5  -5 -18    4.05    2.56
   5  -5  18   11.09    3.18
  -5   5 -19   39.74    4.86
  -5   5 -19   43.14    5.44
   5  -5  19   44.63    6.20
  -5  -5 -19   42.17    6.49
  -5   5 -20   -3.43    2.16
   5  -5  20   -1.88    2.00
  -5  -5 -20    0.42    2.33
  -5   5 -20   -3.31    2.22
  -5  -7  20    4.23    2.19
   5   7 -20    2.80    2.12
   5   7 -20    8.22    3.04
   5   7 -19    4.40    2.33
   5   7 -19   11.22    3.36
  -5  -7  18   17.55    3.44
   5   7 -18   16.42    3.16
   5   7 -18   20.23    3.68
  -5  -7  17    2.66    1.63
   5   7 -17    1.30    1.37
  -5  -7  16   21.57    3.51
   5   7 -16   13.80    2.57
   5   7 -16   19.22    3.42
  -5  -7  15    6.08    2.16
   5   7 -15    3.44    1.76
   5   7 -15    2.57    1.31
  -5  -7  14    6.12    1.93
   5   7 -14    5.65    1.79
   5   7 -14    3.11    1.84
  -5   7  14    5.81    1.00
  -5   7  13   72.97    2.95
  -5   7  13   72.37    2.05
  -5   7  13   67.77    2.86
   5   7 -13   81.55    5.48
   5   7 -13   75.51    5.85
  -5   7  12   76.21    2.81
  -5  -7  12   82.28    6.19
   5   7 -12   81.79    5.58
   5   7 -12   74.91    5.12
   5   7 -11   74.74    5.26
  -5  -7  11   81.62    6.04
  -5   7  11   74.82    3.15
   5   7 -11   71.55    4.86
  -5  -7  10    2.61    1.55
  -5   7  10    2.28    0.66
   5   7 -10    2.42    1.21
   5   7 -10    1.05    1.24
   5   7  -9   43.65    3.83
   5   7  -9   42.99    3.56
  -5   7   9   40.22    2.70
  -5  -7   9   45.27    4.34
   5   7  -8   17.36    2.57
  -5   7   8   18.24    1.90
  -5  -7   8   15.50    2.53
   5   7  -8   19.03    2.39
  -5   7   8   16.24    2.87
  -5  -7   7  433.15   13.48
  -5   7   7  413.02   10.48
   5   7  -7  425.30   12.29
  -5   7   7  400.69   13.38
   5   7  -7  409.90   11.58
  -5  -7   7  427.15   12.14
  -5   7   6   14.82    1.82
  -5  -7   6   12.72    2.20
  -5   7   6   15.22    2.49
   5   7  -6   10.94    1.97
   5   7  -6   13.41    2.01
  -5  -7   6   13.08    1.95
   5   7  -5  118.41    5.98
  -5  -7   5  121.33    6.71
  -5  -7   5  131.37    5.75
  -5  -7   5  123.55    6.51
   5   7  -5  130.45    6.37
  -5   7   5  127.19    5.57
  -5   7   4   35.29    2.98
  -5  -7   4   38.25    3.55
   5   7  -4   35.78    3.23
   5   7  -4   38.45    3.37
  -5  -7   4   39.37    3.86
  -5   7   4   35.74    3.40
  -5  -7   4   36.79    2.90
   5  -7  -4   36.73    1.68
  -5  -7   3    2.05    1.17
   5   7  -3    4.02    1.19
  -5   7   3    1.12    0.81
   5   7  -3    1.34    1.03
  -5  -7   3    3.80    0.99
   5  -7  -3    2.04    0.64
  -5  -7   3    2.96    1.69
  -5   7   3    2.63    1.35
   5   7  -2   94.56    5.02
  -5  -7   2   93.56    5.22
  -5   7   2   94.19    5.13
  -5  -7   2   95.53    4.24
   5  -7  -2  102.13    3.86
   5  -7  -2   85.72    5.18
  -5   7   2   96.32    5.00
   5   7  -2   90.42    5.30
  -5  -7   2   96.99    6.22
   5   7  -1  188.50    7.06
  -5  -7   1  195.69    7.58
  -5   7   1  195.03    7.70
   5   7  -1  194.19    7.97
   5  -7  -1  194.33    8.07
  -5   7   1  196.67    7.00
  -5  -7   1  203.31    6.16
   5  -7  -1  194.90    6.11
   5  -7   0   87.31    5.46
   5   7   0   92.46    5.50
  -5   7   0   86.33    4.39
   5  -7   0   89.31    4.25
  -5  -7   0   94.68    3.86
   5   7   0   90.12    4.64
  -5   7   0   90.74    5.17
  -5  -7   0   93.81    4.98
   5   7   1   13.03    2.25
   5  -7   1   14.20    2.38
  -5   7  -1   14.14    1.82
  -5  -7  -1   11.45    1.69
   5   7   1   12.65    1.69
  -5   7  -1   12.92    2.00
   5  -7   1   18.07    2.07
  -5  -7  -1   12.27    1.34
  -5  -7  -2   60.99    3.77
  -5   7  -2   48.99    3.97
   5   7   2   60.92    3.53
   5  -7   2   55.06    4.44
   5   7   2   56.13    4.58
   5  -7   2   58.57    4.13
   5  -7   2   52.53    3.70
  -5   7  -2   54.81    3.40
  -5   7  -2   53.77    3.76
  -5  -7  -2   53.77    2.60
   5   7   3   62.99    3.40
  -5  -7  -3   64.30    3.81
  -5   7  -3   67.04    4.71
   5  -7   3   65.27    4.25
   5  -7   3   77.18    5.33
   5   7   3   70.53    5.32
   5  -7   3   72.04    4.47
   5   7   3   59.68    4.92
  -5   7  -3   64.92    3.71
  -5   7  -3   70.59    4.31
  -5  -7  -3   70.38    2.73
   5  -7   4  136.37    7.34
   5  -7   4  120.58    5.87
   5   7   4  122.29    7.25
  -5  -7  -4  128.89    3.60
   5  -7   4  135.99    6.47
  -5   7  -4  129.06    5.34
  -5   7  -4  135.75    6.21
  -5  -7  -4  135.05    5.47
  -5  -7  -5    6.45    1.34
   5  -7   5    6.74    1.80
   5  -7   5    6.43    1.57
   5  -7   5    5.68    1.58
  -5   7  -5    5.43    1.28
  -5   7  -5    5.89    1.76
   5   7   5    7.91    0.68
  -5  -7  -6  195.33    6.32
   5  -7   6  207.43    9.45
   5  -7   6  195.62    7.84
   5  -7   6  209.42    8.95
  -5   7  -6  205.38    7.23
  -5   7  -6  204.96    8.01
   5   7   6  205.42    4.04
   5  -7   7    8.22    1.65
  -5   7  -7    9.44    1.75
  -5   7  -7    9.66    1.95
   5   7   7   10.12    0.79
  -5  -7  -7   10.91    1.45
   5  -7   7    4.92    1.61
   5  -7   8    4.64    1.34
  -5   7  -8    3.87    1.13
  -5   7  -8    2.48    1.48
   5   7   8    4.80    0.70
   5  -7   8    4.42    1.98
  -5  -7  -8    5.97    1.05
  -5   7  -9  323.74   10.31
   5   7   9  335.97    6.74
   5  -7   9  327.07   12.69
  -5  -7  -9  314.19    6.89
  -5   7 -10    1.21    1.28
  -5   7 -10    2.03    1.20
   5   7  10    2.06    0.68
  -5   7 -11   62.22    4.60
  -5   7 -11   64.41    5.14
   5   7  11   59.60    2.88
   5  -7  11   60.25    5.53
  -5   7 -12    2.16    1.67
  -5   7 -12    1.85    1.32
   5   7  12    1.44    0.75
   5  -7  12    2.65    1.38
  -5   7 -13   30.98    3.84
  -5   7 -13   34.48    3.85
   5   7  13   21.21    2.12
   5  -7  13   32.15    4.35
   5  -7  14   77.93    6.60
  -5   7 -14   75.50    5.92
  -5   7 -14   76.85    6.11
   5  -7  15   15.61    3.23
  -5   7 -15   10.67    2.48
  -5   7 -15   13.46    2.93
   5  -7  15   11.28    2.85
   5  -7  16   33.22    4.57
  -5   7 -16   25.61    3.92
  -5   7 -16   35.52    4.58
   5  -7  16   37.57    5.30
   5  -7  17    1.73    1.48
  -5   7 -17   -0.11    1.60
  -5   7 -17   -2.11    2.32
   5  -7  17   -1.20    2.51
   5  -7  18    2.41    2.34
  -5   7 -18    1.79    1.77
  -5   7 -18   -0.25    1.75
   5  -7  18    0.07    2.35
  -5   7 -19   18.14    3.80
  -5   7 -19   23.86    4.02
  -5  -9  18    4.12    2.59
   5   9 -18    6.04    2.10
   5   9 -17   11.88    2.76
   5   9 -17    7.63    2.66
  -5  -9  16   11.26    2.88
   5   9 -16   12.65    3.10
   5   9 -16    9.59    2.76
  -5  -9  15    4.21    2.20
   5   9 -15    1.08    1.78
   5   9 -15    0.41    1.81
   5   9 -14   16.22    2.89
   5   9 -14   22.49    3.75
  -5  -9  14   27.26    4.29
   5   9 -13    3.02    1.73
   5   9 -13   -0.88    1.36
  -5  -9  13    1.22    1.82
  -5  -9  12   42.97    5.02
   5   9 -12   46.03    4.36
   5   9 -12   40.88    4.44
   5   9 -11  126.28    7.46
   5   9 -11  131.54    7.36
  -5  -9  11  139.83    8.79
   5   9 -10   10.05    2.49
  -5  -9  10    9.22    2.49
  -5   9  10    8.88    1.50
   5   9 -10   14.29    2.52
  -5  -9   9   11.22    2.59
  -5   9   9    9.48    1.59
   5   9  -9   12.29    2.42
   5   9  -9    9.41    2.09
   5   9  -8   12.31    2.40
  -5  -9   8   10.92    2.55
  -5   9   8   12.09    1.81
   5   9  -8   12.71    2.30
   5   9  -7    5.89    1.76
   5   9  -7    6.49    1.77
  -5   9   7    7.96    1.67
  -5  -9   7    6.40    2.04
  -5   9   6    1.39    1.33
  -5   9   6    2.25    1.19
  -5  -9   6    2.69    1.58
   5   9  -6    3.47    1.62
   5   9  -6    0.37    1.03
  -5  -9   6    2.30    1.23
   5   9  -5    0.68    1.25
  -5   9   5    0.52    1.44
  -5  -9   5    2.56    1.21
  -5   9   5    0.67    0.84
  -5  -9   5    2.90    1.59
  -5   9   4   97.31    5.54
  -5  -9   4  102.12    6.54
   5   9  -4  105.69    6.21
  -5  -9   4  100.60    5.21
   5  -9  -4   82.46    2.16
   5  -9  -4   84.76    2.43
  -5   9   4  124.88    6.74
  -5   9   3   28.34    3.11
  -5  -9   3   39.62    4.12
  -5  -9   3   36.55    3.03
   5  -9  -3   36.03    2.03
   5   9  -3   38.83    3.81
  -5   9   3   30.15    3.28
  -5  -9   2  276.57   10.70
   5   9  -2  288.24   10.74
   5  -9  -2  274.66   10.83
  -5   9   2  287.25   10.02
  -5  -9   2  272.68    8.31
   5  -9  -2  280.32    7.40
  -5  -9   1   27.21    3.28
  -5   9   1   24.52    2.83
  -5  -9   1   28.37    2.35
   5  -9  -1   24.44    2.20
   5   9  -1   31.94    3.79
   5  -9  -1   30.84    3.80
  -5  -9   0   35.42    3.64
  -5   9   0   41.58    3.48
   5  -9   0   43.35    4.47
   5   9   0   35.38    3.84
  -5  -9   0   37.24    2.55
   5  -9   0   48.06    3.33
   5  -9   1   96.27    6.70
  -5   9  -1   96.62    5.35
   5   9   1  101.71    6.62
   5  -9   1  101.20    5.22
   5   9   1   86.03    5.03
  -5  -9  -1   98.44    5.74
  -5  -9  -1   92.45    3.82
   5   9   2    1.01    0.92
  -5   9  -2    0.75    1.20
   5   9   2    0.59    1.36
   5  -9   2    0.89    1.22
  -5  -9  -2   -0.96    1.07
  -5   9  -2    1.06    1.40
  -5  -9  -2    0.85    0.54
   5  -9   2   -0.25    1.17
   5   9   3    9.03    1.61
   5   9   3   10.20    2.47
   5  -9   3   11.80    2.46
   5  -9   3   10.43    2.32
  -5  -9  -3   11.98    2.08
  -5   9  -3   10.91    2.18
  -5  -9  -3    8.53    0.89
   5  -9   3   13.67    2.35
  -5   9  -3    9.84    1.80
  -5  -9  -4    2.71    1.09
   5  -9   4    2.61    1.74
   5  -9   4    3.35    1.47
   5   9   4    3.64    2.20
  -5   9  -4    3.49    1.40
  -5   9  -4    3.10    1.34
   5  -9   4    6.15    1.90
  -5   9  -5   12.21    1.90
   5  -9   5   11.90    2.36
  -5  -9  -5   14.38    2.09
   5   9   5   15.32    3.03
   5  -9   5   16.92    3.07
  -5   9  -5   11.56    2.27
   5  -9   6  153.15    9.01
   5   9   6  163.37    9.75
   5  -9   6  146.32    7.96
  -5   9  -6  152.76    6.95
  -5   9  -6  154.44    7.63
  -5  -9  -6  160.69    6.74
  -5   9  -7    1.23    1.18
   5  -9   7   -0.98    1.75
  -5  -9  -7   -1.10    1.23
   5  -9   7    1.46    1.56
  -5   9  -7   -1.68    1.53
  -5   9  -8  315.10   10.62
   5  -9   8  297.85   12.41
  -5   9  -8  313.32   11.58
  -5  -9  -8  305.07    9.03
   5  -9   8  343.68   14.05
  -5   9  -9    1.89    1.17
   5  -9   9    2.29    1.61
   5  -9   9    1.53    1.85
  -5  -9  -9    2.08    0.80
  -5   9  -9    1.44    1.32
  -5   9 -10   23.35    3.09
   5  -9  10   24.16    3.85
   5  -9  10   21.80    3.72
  -5   9 -10   23.97    3.34
  -5   9 -11   34.41    3.73
   5  -9  11   34.96    4.90
  -5   9 -11   37.77    4.23
   5  -9  11   28.85    4.30
   5  -9  12    3.71    2.08
  -5   9 -12    0.38    1.22
  -5   9 -12    3.62    1.57
   5  -9  12    3.28    1.96
   5  -9  13    1.07    1.94
   5  -9  13    0.09    1.95
  -5   9 -13   -0.13    1.39
  -5   9 -13    1.60    1.49
  -5   9 -14  132.60    8.06
   5  -9  14  149.73   10.02
  -5   9 -14  140.09    8.85
   5  -9  14  151.66   10.53
   5  -9  15    0.93    1.94
  -5   9 -15    0.53    1.52
  -5   9 -15   -0.15    1.63
   5  -9  15    1.21    2.32
   5  -9  16  166.36   10.95
  -5   9 -16  163.41    9.79
  -5   9 -16  163.53   10.07
   5  -9  16  180.76   12.19
   5  -9  17   98.77    8.54
   5  -9  17  100.43    9.13
  -5   9 -17   92.93    7.41
  -5   9 -17   84.96    7.57
   5  11 -15   24.83    4.09
   5  11 -15   29.29    4.34
   5  11 -14    3.74    2.35
   5  11 -14    7.26    2.69
   5  11 -13   30.45    4.52
  -5 -11  13   24.69    4.48
   5  11 -13   24.13    3.67
   5  11 -12   11.22    2.73
   5  11 -12   16.17    3.05
  -5 -11  11    2.26    2.04
   5  11 -11    0.80    1.43
   5  11 -10   79.10    6.27
  -5  11  10   99.92    8.22
   5  11 -10   90.53    6.48
  -5 -11  10   81.19    7.53
   5  11  -9    4.82    1.86
  -5  11   9    6.19    2.19
  -5 -11   9    8.93    3.01
   5  11  -9    5.63    2.06
   5  11  -8  208.72    9.78
  -5 -11   8  190.98   11.28
   5  11  -8  215.77   10.16
   5  11  -7   14.06    2.85
  -5 -11   7   11.04    2.91
  -5  11   7   11.90    2.62
   5  11  -7    5.72    1.82
   5  11  -6   13.07    2.64
  -5  11   6    9.36    2.79
  -5 -11   6   11.50    2.83
   5  11  -6   10.19    2.35
   5  11  -5   18.20    2.97
  -5 -11   5   15.34    2.96
  -5  11   5   19.44    3.27
   5  11  -4    7.46    2.38
  -5 -11   4    4.41    1.39
  -5 -11   4    4.80    1.69
  -5  11   4    6.85    2.26
   5  11  -3   23.34    3.48
  -5 -11   3   20.16    2.48
   5 -11  -3   20.99    1.43
  -5 -11   3   26.90    3.78
  -5  11   3   27.71    3.43
   5  11  -2   14.80    2.81
  -5  11   2   13.65    2.58
   5 -11  -2   15.46    1.61
  -5 -11   2   16.57    3.16
   5 -11  -2   12.12    2.65
   5 -11  -2   12.91    1.35
  -5 -11   2   16.14    2.22
   5 -11  -1   45.32    4.89
  -5  11   1   45.48    4.31
   5  11  -1   48.19    4.80
  -5 -11   1   38.33    2.95
  -5 -11   1   51.09    5.07
   5 -11  -1   47.05    3.19
   5  11   0   18.99    3.26
  -5  11   0   18.77    2.75
   5 -11   0   16.62    2.14
  -5 -11   0   15.88    1.79
  -5 -11   0   17.98    3.10
   5 -11   0   16.17    3.30
   5  11   1   31.76    4.21
  -5  11  -1   23.59    3.01
  -5 -11  -1   26.73    3.62
   5 -11   1   26.04    3.89
  -5  11  -1   28.73    3.61
  -5 -11  -1   22.28    1.93
   5 -11   1   25.37    2.91
  -5  11  -2   11.74    2.19
   5 -11   2   14.13    3.29
  -5 -11  -2    8.89    2.17
   5  11   2   16.22    3.07
  -5  11  -2   10.79    2.44
   5 -11   2   11.87    2.14
  -5  11  -3    1.67    1.64
   5  11   3    1.05    1.67
   5 -11   3    3.37    1.53
  -5  11  -3    2.36    1.60
   5 -11   3    4.15    1.63
  -5  11  -4   25.54    3.12
  -5 -11  -4   28.98    3.48
   5  11   4   30.59    4.12
   5 -11   4   21.16    3.59
  -5  11  -4   22.60    3.28
   5 -11   4   23.41    3.23
   5  11   5   10.76    3.01
  -5 -11  -5    4.71    1.82
   5 -11   5   10.35    3.04
  -5  11  -5    4.52    1.80
   5 -11   5    7.67    1.96
  -5  11  -5    7.05    1.89
  -5 -11  -6   19.88    2.82
   5 -11   6   20.97    3.97
   5  11   6   22.33    4.05
  -5  11  -6   18.11    3.12
   5 -11   6   16.67    3.02
  -5  11  -6   20.77    2.88
  -5 -11  -7    1.89    1.03
   5 -11   7    6.26    2.58
   5  11   7    8.84    2.98
  -5  11  -7    2.20    1.50
   5 -11   7    3.43    1.61
  -5  11  -7    4.40    1.77
   5  11   8    4.94    2.78
   5 -11   8    6.36    2.74
  -5 -11  -8    1.05    1.02
  -5  11  -8    1.52    1.32
   5 -11   8    2.38    1.87
  -5  11  -8    0.44    1.51
   5  11   9   16.22    3.80
   5 -11   9   26.35    4.52
  -5  11  -9   10.63    2.36
  -5  11  -9   21.46    3.51
   5 -11   9   24.71    4.14
  -5  11 -10   20.06    3.14
   5  11  10   15.46    3.81
   5 -11  10   26.36    4.70
  -5  11 -10   19.18    3.48
   5 -11  10   22.28    4.09
   5 -11  11   -2.13    2.20
  -5  11 -11    1.96    1.75
  -5  11 -11    0.12    1.50
   5 -11  11    1.41    2.14
   5 -11  12    0.03    2.47
  -5  11 -12    1.57    1.59
  -5  11 -12    5.89    2.23
   5 -11  12    0.32    2.15
   5 -11  13   34.51    5.52
  -5  11 -13   36.76    4.55
  -5  11 -13   45.68    5.47
   5 -11  13   40.75    5.88
   5 -11  14   -2.22    2.38
   5 -11  14    2.43    2.74
  -5  11 -14    2.32    1.56
  -5  11 -14    1.83    1.95
   5  13 -11    0.76    1.77
  -5 -13  11   -1.31    2.43
  -5  13  11    0.89    2.07
   5  13 -11    2.37    2.05
   5  13 -10   27.09    4.21
  -5 -13  10   32.31    5.44
  -5  13  10   32.66    5.17
   5  13 -10   24.64    4.04
   5  13  -9    7.99    2.54
  -5 -13   9    7.43    2.84
  -5  13   9    5.64    2.84
   5  13  -9    8.42    2.73
   5  13  -8   -0.96    1.51
  -5  13   8   -0.21    1.76
   5  13  -7   64.50    5.94
   5  13  -7   64.40    6.15
  -5  13   7   70.63    6.64
   5  13  -6   15.52    3.20
   5  13  -6   10.89    2.98
  -5  13   6   11.61    2.83
   5  13  -5    1.10    1.69
   5  13  -5    0.25    1.60
  -5  13   5    0.94    1.76
   5  13  -4  194.13   10.31
  -5  13   4  199.23   10.48
  -5  13   3    6.39    1.98
   5  13  -3    7.97    2.53
  -5 -13   3    8.79    2.84
   5  13  -2    7.22    2.38
  -5  13   2    5.67    2.11
  -5 -13   2    4.07    2.14
  -5  13   1    1.14    1.62
   5  13  -1    0.21    1.53
  -5 -13   1    2.15    1.97
   5  13   0    4.39    2.20
  -5  13   0    9.31    2.30
  -5 -13   0    4.16    1.82
   5 -13   0    4.74    2.65
  -5  13  -1   18.32    3.44
   5  13   1   11.27    2.91
  -5  13  -1   19.41    3.05
  -5 -13  -1   19.68    3.74
   5 -13   1   17.49    3.93
  -5  13  -2   43.45    4.87
  -5  13  -2   42.25    4.45
  -5 -13  -2   39.78    4.77
   5 -13   2   44.86    5.87
   5  13   2   46.30    5.44
  -5  13  -3    3.51    1.81
   5  13   3    8.79    2.39
  -5 -13  -3    3.46    2.26
   5 -13   3    3.92    2.01
  -5  13  -3    5.42    2.17
   5 -13   3    6.12    1.86
  -5  13  -4   -2.73    1.57
  -5 -13  -4    0.63    1.50
   5 -13   4    2.41    1.92
   5  13   4   -1.52    1.94
  -5  13  -4   -2.29    1.62
   5 -13   4    1.30    1.73
  -5 -13  -5   18.64    3.09
   5 -13   5   25.41    4.67
   5  13   5   26.40    4.54
  -5  13  -5   26.26    4.06
   5 -13   5   24.74    3.75
  -5  13  -5   22.76    3.20
  -5 -13  -6   14.57    2.84
   5 -13   6   21.31    4.30
   5  13   6   17.52    3.71
  -5  13  -6   21.04    3.49
   5 -13   6   15.71    3.12
  -5  13  -6   15.28    2.82
   5  13   7   11.38    3.81
   5 -13   7    9.60    3.72
  -5  13  -7    6.67    2.45
   5 -13   7   10.93    2.92
  -5  13  -7   10.72    2.67
   5  13   8    7.41    3.49
   5 -13   8    0.13    2.44
  -5  13  -8    4.37    2.22
   5 -13   8    1.93    1.81
  -5  13  -8    3.77    1.88
   5 -13   9   14.10    3.87
   5  13   9   25.21    4.79
  -5  13  -9   24.90    4.02
   5 -13   9   16.84    3.79
  -5  13  -9    9.85    2.58
  -5  13 -10    1.56    1.69
   5 -13  10    5.62    2.91
   5  13  10    5.36    2.30
   6   0 -23    2.90    2.45
   6   0 -22   25.27    4.48
   6   0 -21    1.18    1.97
   6   0 -21    1.67    1.73
   6   0 -20    1.13    1.80
   6   0 -20   -1.09    1.60
   6   0 -19   -2.24    1.88
   6   0 -19    1.11    1.43
  -6   0  19    1.16    0.89
   6   0 -18  154.05    8.76
  -6   0  18  149.77    6.05
   6   0 -18  165.66    8.70
   6   0 -17   -4.71    2.06
  -6   0  17    0.95    0.97
   6   0 -17   -2.30    1.37
   6   0 -16   47.41    4.65
  -6   0  16   43.85    3.06
   6   0 -16   39.59    3.99
  -6   0  15    0.46    0.88
   6   0 -15    1.01    1.57
  -6   0  15   -0.82    1.02
   6   0 -15    2.60    1.52
  -6   0  14  162.51    5.78
   6   0 -14  167.55    7.75
  -6   0  14  164.58    6.41
   6   0 -14  171.18    7.38
  -6   0  13   -0.36    1.00
   6   0 -13    0.26    0.83
  -6   0  13    0.28    0.59
   6   0 -13   -1.20    1.28
  -6   0  13   -0.55    0.83
  -6   0  12   50.85    3.67
  -6   0  12   52.17    2.95
  -6   0  12   49.63    3.68
   6   0 -12   53.12    3.97
   6   0 -12   49.92    3.44
  -6   0  12   54.98    3.24
  -6   0  11    1.57    1.02
   6   0 -11    0.47    0.71
  -6   0  11    0.76    0.72
  -6   0  11    0.83    1.09
   6   0 -11    0.58    0.89
  -6   0  11    0.14    0.62
  -6   0  10  926.36   18.27
  -6   0  10  930.48   16.57
  -6   0  10  942.19   18.27
   6   0 -10  959.03   18.80
   6   0 -10  929.94   17.26
  -6   0  10  948.52   16.61
  -6   0   9    0.08    0.67
   6   0  -9    0.28    0.63
  -6   0   9   -0.33    0.57
   6   0  -9    0.67    0.91
  -6   0   9    0.10    0.72
  -6   0   9   -0.44    0.56
  -6   0   8   33.76    2.51
  -6   0   8   34.77    2.12
  -6   0   8   29.98    2.25
   6   0  -8   31.19    2.58
  -6   0   8   31.56    1.89
   6   0  -8   33.97    2.05
  -6   0   7    0.82    0.44
  -6   0   7    0.68    0.67
   6   0  -7   -0.25    0.53
   6   0  -7    1.66    0.98
  -6   0   7    1.19    0.75
  -6   0   6 1627.00   22.73
   6   0  -6 1632.93   23.02
  -6   0   6 1612.79   24.64
   6   0  -6 1632.57   25.15
  -6   0   6 1634.01   25.32
  -6   0   5    0.70    0.34
   6   0  -5    0.23    0.28
  -6   0   5    0.51    0.37
  -6   0   5   -0.29    0.60
   6   0  -5   -0.06    0.51
   6   0  -5    0.31    0.48
  -6   0   4  174.21    5.04
   6   0  -4  167.41    4.96
  -6   0   4  175.57    4.28
   6   0  -4  174.45    4.38
  -6   0   3    0.35    0.52
   6   0  -3    0.15    0.54
   6   0  -3    0.13    0.46
  -6   0   3    0.04    0.35
   6   0  -1    1.06    0.34
  -6   0   1    0.23    0.35
  -6   0   1   -0.11    0.26
   6   0  -1    0.12    0.32
  -6   0   1    0.07    0.56
   6   0  -1   -0.46    0.62
   6   0   0   90.72    2.37
  -6   0   0   85.67    2.43
   6   0   0   83.87    2.37
   6   0   0   85.19    3.33
   6   0   1    0.22    0.44
   6   0   1    0.34    0.73
  -6   0  -1    0.74    0.58
  -6   0  -1    0.03    0.47
  -6   0  -2   14.71    1.28
   6   0   2   14.90    1.20
  -6   0  -2   12.76    1.47
   6   0   2   15.11    1.58
   6   0   3   -0.02    0.43
   6   0   3    0.46    0.51
   6   0   3    0.72    0.74
  -6   0  -3   -0.43    0.83
  -6   0  -3    0.45    0.55
  -6   0  -4   21.19    1.83
   6   0   4   19.58    1.62
  -6   0  -4   19.38    1.85
   6   0   4   18.83    1.53
   6   0   4   17.45    1.78
  -6   0  -5    0.26    0.55
   6   0   5   -0.35    0.65
  -6   0  -5   -0.45    0.97
   6   0   5   -0.28    0.67
   6   0   5    1.13    0.85
   6   0   6  238.23    7.85
  -6   0  -6  234.83    7.39
   6   0   6  239.46    6.97
   6   0   6  228.65    6.67
  -6   0  -6  243.98    6.46
  -6   0  -7    0.94    0.76
   6   0   7    0.74    0.77
   6   0   7    0.37    0.75
   6   0   7    0.19    0.94
  -6   0  -7   -0.90    0.95
   6   0   8   48.02    3.62
   6   0   8   55.19    3.39
   6   0   8   50.83    3.39
  -6   0  -8   51.62    3.70
  -6   0  -9   -0.53    0.62
  -6   0  -9    1.87    0.97
   6   0   9    0.07    0.84
   6   0   9   -0.42    0.89
   6   0   9   -0.17    0.94
   6   0  10  631.52   16.18
  -6   0 -10  622.05   12.88
   6   0  10  651.75   14.93
  -6   0 -10  630.09   15.79
   6   0  10  659.15   15.14
  -6   0 -11   -0.57    0.53
   6   0  11    0.23    0.79
   6   0  11    0.01    1.07
  -6   0 -11    1.81    1.41
  -6   0 -12   17.92    1.73
   6   0  12   16.91    2.65
  -6   0 -12   12.47    2.24
  -6   0 -13    0.71    0.69
   6   0  13   -0.05    1.26
  -6   0 -14    9.06    1.33
   6   0  14   13.22    2.76
  -6   0 -14   10.66    2.61
  -6   0 -15   -0.58    0.75
   6   0  15   -2.36    1.75
  -6   0 -15    2.03    1.96
   6   0  16   15.54    3.06
  -6   0 -16   10.00    2.71
   6   0  17    1.24    1.65
  -6   0 -17    0.16    1.77
  -6   0 -18   59.95    6.39
   6   0  18   52.01    5.64
   6   0  19   -2.37    2.16
  -6   0 -19    0.51    2.13
   6   0  20   12.20    3.08
  -6   0 -20   16.06    3.95
   6   0  21    4.00    3.08
  -6   0 -21    0.73    2.20
   6  -2 -23    0.02    2.50
   6   2 -23   -1.91    1.86
   6   2 -22    4.48    2.06
   6  -2 -22    9.79    3.18
   6   2 -22   13.31    3.58
   6  -2 -21    0.73    2.12
   6   2 -21    2.87    2.29
   6   2 -21   -0.28    2.02
   6   2 -20   12.70    2.84
   6  -2 -20   14.70    3.40
  -6  -2  20   11.75    2.29
   6   2 -20   12.98    3.22
   6  -2 -19    3.76    2.08
   6   2 -19    0.55    1.48
   6   2 -19    1.19    1.95
  -6  -2  19    2.47    1.25
   6  -2 -18   15.70    3.18
   6   2 -18   17.22    2.90
  -6  -2  18   11.93    2.21
   6   2 -18   19.04    3.23
   6   2 -17   17.74    2.79
   6  -2 -17   18.62    3.14
  -6  -2  17   15.72    2.21
  -6   2  17   16.07    1.50
   6   2 -17   19.66    3.17
   6  -2 -16   16.92    2.94
   6   2 -16   17.84    2.66
   6   2 -16   13.85    2.64
  -6  -2  16   17.34    2.28
  -6   2  16   16.88    1.46
  -6   2  15  137.48    4.38
  -6  -2  15  136.17    6.26
  -6   2  15  124.64    6.26
   6  -2 -15  140.41    7.85
   6   2 -15  152.60    7.79
  -6   2  15  128.06    5.99
   6   2 -15  139.10    6.69
  -6  -2  14   11.68    1.81
  -6   2  14   12.82    1.28
  -6   2  14   11.50    1.82
   6  -2 -14   13.46    2.52
   6   2 -14   13.05    2.31
  -6  -2  14   12.84    1.95
  -6   2  14   11.41    1.92
   6   2 -14   14.87    2.15
  -6  -2  13    3.05    1.11
  -6   2  13    2.54    0.67
  -6   2  13    2.39    1.05
   6  -2 -13    2.99    1.51
   6   2 -13    1.35    1.29
   6   2 -13    0.35    0.93
  -6   2  13    2.91    1.14
  -6  -2  13    3.33    0.97
  -6  -2  12    4.95    1.19
  -6   2  12    4.79    0.82
   6  -2 -12    3.52    1.16
  -6  -2  12    4.27    1.26
  -6   2  12    5.71    1.27
  -6   2  12    4.64    1.31
   6   2 -12    6.99    1.68
   6   2 -12    4.11    1.23
  -6   2  12    4.21    1.23
  -6  -2  12    4.94    1.19
  -6   2  11   28.11    1.84
  -6  -2  11   26.06    2.44
   6  -2 -11   24.87    2.72
  -6   2  11   26.36    2.34
  -6  -2  11   24.22    2.66
   6   2 -11   26.25    2.72
  -6  -2  11   22.53    2.58
   6  -2 -11   26.21    2.68
  -6   2  11   27.70    2.81
  -6  -2  11   26.94    2.26
  -6   2  11   27.80    2.31
   6   2 -11   27.68    2.34
  -6  -2  10 1531.60   26.41
   6  -2 -10 1565.71   27.45
  -6   2  10 1545.24   25.84
  -6  -2  10 1575.56   27.93
   6   2 -10 1587.78   27.47
  -6  -2  10 1501.85   26.88
  -6  -2  10 1504.87   25.00
  -6   2  10 1547.50   26.81
   6  -2 -10 1558.66   27.26
  -6   2  10 1613.92   25.71
   6   2 -10 1514.90   25.51
  -6  -2   9   59.90    3.46
   6  -2  -9   60.79    3.66
  -6  -2   9   58.65    3.71
  -6  -2   9   55.44    3.62
   6   2  -9   62.89    3.69
  -6  -2   9   61.50    3.06
  -6   2   9   63.22    3.58
   6  -2  -9   55.08    3.50
  -6   2   9   64.86    3.21
   6   2  -9   60.87    3.07
  -6  -2   8   33.72    2.52
   6  -2  -8   32.52    2.54
  -6   2   8   38.31    2.41
  -6  -2   8   39.55    2.90
   6   2  -8   34.91    2.70
  -6  -2   8   38.68    2.78
  -6   2   8   42.37    2.70
  -6  -2   8   36.46    2.19
   6  -2  -8   38.90    2.74
   6   2  -8   38.86    2.37
  -6   2   8   35.63    2.28
  -6  -2   7  592.51   12.31
   6  -2  -7  582.75   11.94
   6  -2  -7  571.38   11.22
  -6  -2   7  608.86   12.85
  -6   2   7  592.94   11.63
  -6  -2   7  575.58   12.20
   6   2  -7  593.88   12.39
  -6   2   7  578.55   11.91
  -6  -2   7  574.71   10.83
   6   2  -7  592.94   10.90
  -6   2   7  570.70   11.15
  -6   2   6  159.47    4.68
  -6  -2   6  152.95    5.29
   6   2  -6  156.87    5.22
  -6  -2   6  155.81    5.26
  -6   2   6  159.56    4.90
   6   2  -6  160.79    4.30
  -6  -2   6  162.95    5.52
  -6   2   6  158.79    4.85
   6  -2  -6  166.75    4.70
  -6   2   5   57.86    2.58
  -6  -2   5   54.94    2.91
  -6  -2   5   54.76    2.84
   6   2  -5   58.14    2.88
  -6   2   5   55.80    2.48
   6   2  -5   55.50    2.23
  -6   2   5   59.06    2.70
   6   2  -5   57.27    3.01
  -6  -2   5   59.60    3.10
   6  -2  -5   56.87    2.58
   6   2  -4   33.64    2.19
   6  -2  -4   38.22    2.06
  -6  -2   4   40.48    2.43
  -6  -2   4   34.49    2.22
  -6   2   4   37.63    1.94
  -6  -2   4   40.18    2.30
   6   2  -4   38.13    2.25
  -6   2   4   37.38    1.82
   6   2  -4   36.84    1.77
  -6   2   4   35.24    2.05
  -6   2   3  250.57    6.11
   6  -2  -3  245.00    5.86
   6   2  -3  250.78    6.12
  -6   2   3  247.28    4.98
   6   2  -3  244.39    6.29
  -6  -2   3  240.43    6.32
  -6  -2   3  247.08    6.34
  -6   2   2  599.28   11.22
   6  -2  -2  596.03   11.07
   6   2  -2  595.65   11.29
  -6  -2   2  598.88   11.46
  -6  -2   2  599.97   11.57
   6   2  -2  609.91   11.24
  -6  -2   1   38.12    2.13
   6  -2  -1   33.68    2.11
  -6   2   1   32.24    2.06
   6   2  -1   38.38    2.27
  -6  -2   1   37.90    2.43
  -6   2   1   36.29    1.60
   6   2  -1   37.59    2.11
  -6   2   0   29.52    2.10
   6  -2   0   25.79    2.00
  -6  -2   0   28.76    1.89
   6   2   0   29.33    2.10
   6   2   0   32.09    1.91
  -6   2   0   26.01    1.46
   6  -2   0   28.07    1.57
   6   2   0   29.57    2.01
  -6   2  -1 1958.42   27.68
   6   2   1 1934.57   29.40
  -6   2  -1 1944.17   29.76
  -6  -2  -1 1882.96   29.43
   6  -2   1 1878.89   26.05
  -6   2  -1 1949.54   25.93
   6  -2   1 1942.46   27.84
   6  -2   1 1853.57   29.54
   6   2   1 1874.44   28.51
  -6  -2  -1 1831.26   28.55
  -6   2  -2   76.93    2.98
  -6   2  -2   72.71    3.57
  -6   2  -2   82.19    3.77
   6  -2   2   72.56    3.63
   6   2   2   77.64    3.50
  -6  -2  -2   76.19    3.72
  -6   2  -2   78.51    2.31
   6  -2   2   77.96    2.30
   6  -2   2   78.03    3.01
  -6  -2  -2   74.82    3.18
   6   2   2   76.60    3.21
   6  -2   3    6.81    1.08
  -6   2  -3    7.58    1.11
  -6   2  -3    8.95    1.34
   6   2   3    9.54    1.33
  -6  -2  -3    8.88    1.41
   6  -2   3    8.15    0.80
  -6   2  -3    8.58    0.92
   6   2   3    8.82    1.21
  -6  -2  -3    8.70    1.20
   6  -2   3    6.90    1.48
   6   2   4   74.30    3.72
   6  -2   4   74.21    3.32
  -6   2  -4   69.25    3.36
  -6   2  -4   72.10    3.67
  -6  -2  -4   77.13    4.13
   6  -2   4   72.46    4.00
  -6  -2  -4   73.71    3.41
   6  -2   4   72.85    2.78
  -6   2  -4   71.01    2.88
   6   2   4   74.71    3.43
  -6   2  -5    0.17    0.75
   6  -2   5    0.27    0.63
  -6   2  -5    1.01    0.76
   6  -2   5    1.83    0.74
   6  -2   5    1.02    0.93
   6   2   5    0.61    0.78
  -6   2  -5    1.20    0.64
   6   2   5    0.25    0.83
  -6  -2  -5    0.36    1.00
  -6  -2  -5   -0.22    0.73
   6   2   6  179.11    6.04
  -6   2  -6  178.70    6.29
   6  -2   6  169.56    5.34
   6  -2   6  168.79    6.91
  -6  -2  -6  169.98    6.83
  -6   2  -6  166.08    5.45
   6   2   6  172.60    6.25
  -6   2  -6  175.61    6.05
  -6   2  -7  332.02    9.21
   6   2   7  318.14    9.12
   6  -2   7  337.18   10.42
  -6  -2  -7  326.40   10.28
   6  -2   7  328.32    8.30
  -6   2  -7  320.62    8.48
   6   2   7  329.34    9.30
  -6   2  -7  339.99    9.29
   6  -2   7  333.25    8.87
   6   2   7  312.38    9.17
  -6  -2  -8    0.46    0.51
  -6   2  -8   -0.02    0.73
  -6   2  -8    1.31    1.09
   6   2   8   -0.25    0.79
   6  -2   8   -0.01    0.90
   6  -2   8    0.04    1.06
  -6  -2  -8    0.29    1.00
   6  -2   8    0.29    0.67
   6   2   8    0.03    0.77
  -6   2  -8   -0.15    0.73
   6   2   8    0.03    0.87
   6   2   9    1.22    0.98
  -6   2  -9    2.38    0.98
  -6  -2  -9    2.44    0.53
   6   2   9    2.65    0.97
  -6   2  -9    0.62    1.12
   6  -2   9    1.53    0.94
  -6   2  -9    1.48    0.88
   6   2   9    1.59    1.09
   6  -2   9    1.34    0.80
  -6  -2  -9    0.67    1.13
   6  -2   9    2.59    1.29
  -6  -2 -10   43.20    4.11
   6  -2  10   43.22    4.03
   6   2  10   41.61    3.53
  -6  -2 -10   44.50    1.83
  -6   2 -10   39.78    3.14
   6  -2  10   39.81    3.16
   6   2  10   41.79    3.58
  -6   2 -10   42.79    3.37
   6   2  10   42.09    3.47
   6  -2  10   42.41    3.40
  -6   2 -10   44.47    3.66
   6   2  11   11.32    2.06
  -6  -2 -11   12.68    2.39
   6  -2  11   11.21    2.34
  -6  -2 -11   13.94    0.97
  -6   2 -11   10.45    1.68
   6  -2  11   12.06    1.92
  -6   2 -11   13.09    2.04
  -6   2 -11   13.49    2.23
   6   2  12    1.29    1.41
   6  -2  12   -0.15    1.68
  -6  -2 -12    1.65    1.45
  -6  -2 -12    1.64    0.40
  -6   2 -12    1.28    0.91
  -6   2 -12    1.45    1.05
  -6   2 -12    0.40    0.98
   6   2  13   15.04    2.63
   6  -2  13   11.10    2.54
  -6  -2 -13    8.53    2.37
  -6   2 -13   12.42    1.84
  -6  -2 -13   10.53    0.74
  -6   2 -13    9.99    2.08
  -6   2 -13   10.02    2.28
  -6  -2 -14  113.64    7.73
   6  -2  14  107.98    7.37
   6   2  14  109.38    6.70
  -6   2 -14   94.23    5.16
  -6   2 -14  101.17    6.17
  -6   2 -14  111.67    6.92
   6   2  15   78.98    5.92
  -6  -2 -15   85.28    6.95
   6  -2  15   78.20    6.57
  -6   2 -15   77.93    4.74
  -6   2 -15   76.08    5.67
  -6   2 -15   92.65    6.64
   6  -2  16   15.96    3.25
  -6   2 -16   21.36    3.63
  -6  -2 -16   22.73    3.87
  -6   2 -16   14.79    2.09
  -6   2 -16   18.64    3.18
   6   2  16   20.70    3.31
  -6   2 -17    3.39    1.65
   6   2  17   -1.81    1.77
  -6   2 -17   -1.43    1.40
   6  -2  17    1.14    1.57
  -6  -2 -17   -0.50    2.30
   6  -2  18    8.65    2.68
   6   2  18   15.83    3.27
  -6  -2 -18   15.07    3.81
  -6   2 -18   13.07    3.18
  -6   2 -19   49.13    5.93
   6   2  19   37.09    4.69
   6  -2  19   36.94    5.13
  -6  -2 -19   40.69    5.83
   6  -2  20   -0.22    1.82
   6   2  20    0.27    1.52
  -6  -2 -20   -3.73    2.82
  -6   2 -20    3.24    2.75
   6   2  21    6.08    2.63
   6  -2  21    4.04    2.71
  -6   2 -21   -1.05    2.44
  -6  -2 -21    3.64    2.71
   6   4 -22   13.81    3.27
   6  -4 -22   11.41    3.27
   6   4 -22   10.54    2.95
   6   4 -21    3.30    1.91
   6  -4 -21    5.92    3.06
   6   4 -21    8.59    2.79
   6   4 -20   17.34    3.29
   6  -4 -20   13.15    3.35
   6   4 -20   10.53    3.15
  -6  -4  20   13.96    2.51
   6  -4 -19    6.63    2.69
   6   4 -19    0.19    1.39
   6   4 -19    5.22    2.20
  -6  -4  19    4.17    1.77
   6  -4 -18   63.56    6.08
  -6  -4  18   59.98    5.01
   6   4 -18   66.63    6.03
   6   4 -18   58.72    5.02
   6  -4 -17    7.02    2.43
  -6  -4  17    7.97    1.74
   6   4 -17    3.49    1.68
   6   4 -17    5.26    1.65
  -6   4  16   11.23    2.11
   6  -4 -16   12.80    2.85
  -6  -4  16   10.60    2.10
   6   4 -16    9.99    2.58
   6   4 -16   14.40    2.45
  -6   4  15  206.63    7.83
  -6  -4  15  221.29    9.08
   6  -4 -15  225.48   10.30
   6   4 -15  206.27    9.47
   6   4 -15  203.25    8.45
  -6  -4  14  923.11   21.01
  -6   4  14  933.23   14.05
  -6   4  14  915.68   14.67
   6   4 -14  955.19   21.86
  -6   4  14  914.55   18.94
   6  -4 -14  973.59   23.04
   6   4 -14  907.45   19.90
  -6  -4  13   51.01    4.09
  -6   4  13   53.00    2.12
   6  -4 -13   54.65    4.57
  -6   4  13   50.77    3.49
   6   4 -13   50.30    4.22
  -6  -4  13   45.69    3.54
   6   4 -13   44.69    3.57
  -6   4  13   52.11    3.88
  -6  -4  12    2.55    1.36
   6  -4 -12    3.90    1.60
  -6   4  12    2.06    0.85
  -6   4  12    2.60    0.98
  -6  -4  12    3.55    1.22
   6   4 -12    1.95    1.55
   6   4 -12    3.53    1.28
  -6  -4  11  128.96    6.26
  -6   4  11  129.12    4.98
   6   4 -11  124.15    6.12
  -6  -4  11  121.90    5.31
  -6   4  11  123.99    6.03
   6   4 -11  125.51    5.60
   6   4 -10   65.60    4.15
  -6  -4  10   64.52    4.27
  -6   4  10   66.35    4.14
  -6  -4  10   64.21    4.43
  -6   4  10   65.65    3.30
  -6  -4  10   64.44    4.27
   6   4 -10   66.79    4.41
  -6   4  10   70.63    4.22
   6   4 -10   66.39    3.71
   6   4  -9  281.53    8.89
  -6  -4   9  282.58    9.20
  -6   4   9  280.55    8.73
  -6  -4   9  290.90    9.46
  -6   4   9  276.01    7.11
  -6  -4   9  279.56    9.07
   6   4  -9  256.84    8.55
  -6   4   9  283.76    8.55
   6   4  -9  277.31    7.91
  -6   4   8   34.73    2.88
   6   4  -8   37.09    3.01
  -6  -4   8   36.65    3.07
   6   4  -8   33.00    2.85
  -6  -4   8   37.86    3.05
   6   4  -8   38.67    2.66
  -6   4   8   35.10    2.81
  -6  -4   8   35.95    3.05
  -6   4   8   35.83    2.22
   6  -4  -7  111.65    3.63
  -6  -4   7  123.90    5.37
   6   4  -7  121.98    5.22
  -6  -4   7  119.28    5.47
  -6   4   7  117.32    5.23
   6   4  -7  107.58    4.91
  -6  -4   7  117.90    5.48
   6   4  -7  111.77    4.49
  -6   4   7  113.57    4.73
  -6   4   7  120.15    4.05
  -6  -4   6  138.54    5.55
   6  -4  -6  137.76    3.88
  -6  -4   6  136.44    5.74
   6   4  -6  137.59    5.46
  -6  -4   6  130.37    5.49
  -6   4   6  137.35    4.95
  -6   4   6  143.40    5.75
   6   4  -6  130.91    5.32
   6   4  -6  131.39    4.84
  -6   4   6  135.39    4.21
  -6   4   5   46.23    2.88
  -6  -4   5   48.28    3.30
  -6  -4   5   48.48    3.25
   6   4  -5   44.58    3.00
   6   4  -5   49.53    3.23
   6   4  -5   43.62    2.62
  -6  -4   5   47.13    3.05
   6  -4  -5   51.06    2.22
  -6  -4   4   63.15    3.65
   6   4  -4   68.01    3.57
   6   4  -4   68.74    3.73
   6  -4  -4   67.88    2.68
  -6  -4   4   65.83    3.42
  -6  -4   4   65.81    3.82
  -6   4   4   68.84    3.62
  -6   4   4   70.95    2.87
   6   4  -3  120.13    4.94
  -6  -4   3  123.00    5.30
  -6   4   3  124.65    4.96
  -6  -4   3  117.37    4.94
   6   4  -3  111.23    4.24
  -6  -4   3  113.47    4.42
  -6   4   3  118.94    3.92
   6  -4  -3  122.47    3.93
  -6  -4   2   35.59    2.94
  -6   4   2   29.83    2.53
   6   4  -2   30.09    2.49
  -6   4   2   29.96    2.08
  -6  -4   2   28.75    2.30
  -6   4   2   33.76    2.05
   6   4  -2   28.49    1.97
  -6  -4   2   32.36    2.25
   6  -4  -2   30.96    2.03
  -6  -4   1    1.96    1.06
  -6   4   1    2.46    0.97
  -6   4   1    3.89    0.87
   6   4  -1    2.58    1.01
  -6  -4   1    2.44    0.83
   6  -4  -1    1.26    0.76
  -6   4   1    2.96    0.91
   6   4  -1    3.15    0.84
  -6  -4   1    2.92    0.92
   6   4   0   87.81    3.31
  -6  -4   0   86.51    3.71
   6   4   0   82.26    4.37
  -6   4   0   88.12    3.04
  -6   4   0   92.93    4.44
  -6   4   0   88.24    3.83
  -6   4   0   93.13    3.67
  -6  -4   0   86.01    3.45
   6  -4   0   83.32    3.86
   6   4   1  173.07    4.80
  -6  -4  -1  162.88    5.12
   6  -4   1  167.29    4.88
  -6   4  -1  163.86    6.24
   6   4   1  174.14    6.75
   6   4   1  168.94    6.65
   6  -4   1  157.02    5.71
  -6   4  -1  167.83    4.38
  -6   4  -1  167.79    5.30
  -6  -4  -1  172.60    5.04
   6   4   2 1802.67   26.52
  -6  -4  -2 1703.48   26.94
  -6   4  -2 1776.49   29.97
   6  -4   2 1729.25   26.57
   6  -4   2 1750.04   30.24
   6  -4   2 1729.63   29.15
   6   4   2 1796.29   30.60
  -6   4  -2 1724.45   26.00
  -6   4  -2 1751.07   27.68
  -6  -4  -2 1751.01   26.87
  -6  -4  -3  357.46    8.00
   6  -4   3  382.67   10.64
   6  -4   3  369.55    8.16
   6   4   3  378.70   10.80
   6  -4   3  363.51   10.09
  -6   4  -3  379.30    7.93
   6  -4   3  368.16    9.16
  -6   4  -3  387.60    9.18
   6   4   3  384.27    8.11
  -6  -4  -3  384.16    8.33
   6   4   4  405.12    8.87
  -6  -4  -4  412.06    8.41
  -6   4  -4  433.92   11.49
   6  -4   4  420.40   11.58
  -6  -4  -4  418.07    9.06
   6  -4   4  409.28   11.29
   6   4   4  415.96   11.62
  -6   4  -4  427.48    8.96
   6  -4   4  418.95    9.08
   6  -4   4  437.83   10.36
  -6   4  -4  427.79   10.11
   6   4   5  687.62   12.88
  -6   4  -5  666.08   15.40
  -6  -4  -5  666.42   11.57
   6  -4   5  643.32   15.61
  -6  -4  -5  665.56   16.36
   6   4   5  678.70   15.88
   6  -4   5  679.78   15.90
  -6  -4  -5  686.93   12.98
  -6   4  -5  668.85   12.82
   6  -4   5  647.48   12.97
   6  -4   5  656.32   14.13
  -6   4  -5  661.17   14.08
   6   4   6    6.81    1.23
  -6  -4  -6    7.76    0.86
  -6   4  -6    8.89    1.68
   6  -4   6    6.15    1.48
   6  -4   6    8.20    1.78
   6   4   6    6.34    1.64
  -6  -4  -6    6.95    1.86
   6  -4   6    7.30    1.18
   6  -4   6    7.49    1.44
  -6   4  -6    5.93    1.10
  -6   4  -6    4.70    1.31
   6   4   7    9.18    1.44
  -6   4  -7   10.69    1.91
  -6  -4  -7    9.36    0.85
   6  -4   7    9.30    1.82
   6   4   7   11.18    2.14
  -6  -4  -7    9.05    2.11
   6  -4   7   11.75    2.36
   6  -4   7    8.83    1.49
  -6   4  -7   11.19    1.49
   6  -4   7   10.47    1.71
  -6   4  -7    9.94    1.66
   6   4   8    1.26    0.90
  -6  -4  -8    0.89    0.31
  -6   4  -8    0.67    1.10
   6  -4   8    0.61    0.83
   6   4   8    1.32    0.90
  -6  -4  -8    1.62    1.35
   6  -4   8    0.94    1.29
   6  -4   8    0.02    0.72
  -6   4  -8    4.08    1.17
   6  -4   8   -0.09    0.98
  -6   4  -8    0.83    0.96
   6   4   9   20.88    2.17
  -6   4  -9   20.81    2.55
   6  -4   9   21.49    2.72
   6  -4   9   17.49    2.78
  -6  -4  -9   21.26    3.37
   6  -4   9   18.42    2.15
  -6   4  -9   18.38    2.22
  -6   4  -9   18.80    2.44
   6   4  10  231.66    7.87
  -6   4 -10  229.35    8.80
   6  -4  10  232.85    9.22
  -6  -4 -10  217.56   10.19
   6  -4  10  197.08    9.36
   6  -4  10  214.76    7.72
  -6   4 -10  231.26    8.15
  -6   4 -10  232.92    8.85
   6   4  11    1.71    1.04
   6  -4  11    2.17    1.34
  -6   4 -11    2.53    1.12
  -6  -4 -11    1.45    1.61
   6  -4  11   -0.88    1.41
  -6   4 -11    1.72    1.07
  -6   4 -11    1.46    1.15
   6  -4  12   47.66    4.29
  -6   4 -12   47.99    4.23
   6  -4  12   47.59    4.84
  -6  -4 -12   44.72    5.18
  -6   4 -12   51.59    4.14
   6   4  12   41.87    3.64
   6  -4  13   25.02    3.19
  -6   4 -13   26.82    3.50
  -6   4 -13   22.04    2.96
   6   4  13   21.52    2.73
  -6  -4 -13   28.43    4.29
   6  -4  13   26.50    3.85
  -6   4 -14   71.71    5.61
  -6   4 -14   71.49    5.28
   6   4  14   67.74    4.91
   6  -4  14   70.02    6.38
  -6  -4 -14   72.69    6.63
  -6   4 -15    0.77    1.46
  -6   4 -15   -0.16    1.33
   6   4  15    1.96    1.58
  -6  -4 -15    1.21    1.77
   6  -4  15    0.67    2.07
  -6   4 -16   -1.33    1.70
  -6   4 -16    3.01    1.84
   6   4  16   -0.46    1.25
   6  -4  16   -0.19    1.59
  -6  -4 -16   -1.95    1.84
  -6   4 -17    0.94    1.44
   6  -4  17    0.45    1.81
  -6  -4 -17    2.64    2.79
   6   4  17    3.23    1.80
  -6   4 -17    2.94    1.72
  -6  -4 -18   35.02    5.46
   6  -4  18   27.29    4.52
  -6   4 -18   34.86    4.78
   6   4  18   34.71    4.20
  -6   4 -18   31.89    4.44
   6  -4  19   17.20    4.00
  -6  -4 -19   19.81    4.52
  -6   4 -19   23.63    4.26
   6   4  19   18.07    3.27
  -6   4 -19   22.52    3.90
  -6  -4 -20   14.79    4.32
  -6   4 -20    8.01    2.84
  -6   4 -20   13.58    3.11
   6  -4  20   11.52    3.60
   6   6 -21   -1.53    2.53
   6   6 -21    1.92    1.75
  -6  -6  21    0.78    1.62
   6   6 -20    2.34    1.98
   6   6 -20    6.63    2.45
  -6  -6  20    5.04    2.38
   6   6 -19    6.58    2.48
   6   6 -19    6.99    2.23
  -6  -6  19    8.56    2.43
   6   6 -18   17.87    3.46
   6   6 -18   13.28    2.80
  -6  -6  18   18.62    3.35
   6   6 -17    9.83    2.46
   6   6 -17   13.49    2.66
  -6  -6  17   10.46    2.45
  -6  -6  16    7.08    2.11
   6   6 -16   13.13    2.46
   6   6 -16   11.46    2.65
  -6  -6  15    3.48    1.92
   6   6 -15    3.75    1.72
   6   6 -15    0.18    1.08
   6   6 -14  574.89   16.69
   6   6 -14  594.31   15.86
  -6  -6  14  598.46   17.48
  -6   6  13   21.53    1.99
  -6   6  13   24.77    1.42
  -6  -6  13   21.00    3.05
   6   6 -13   18.22    3.02
   6   6 -13   23.23    2.86
  -6  -6  12  225.62    9.80
  -6   6  12  235.05    5.85
   6   6 -12  231.30    9.55
  -6   6  12  221.62    6.48
   6   6 -12  237.52    8.65
  -6  -6  11   54.43    4.57
  -6   6  11   58.55    2.90
  -6   6  11   49.77    4.30
   6   6 -11   50.26    4.17
   6   6 -11   53.59    3.85
  -6   6  11   52.92    2.72
  -6   6  10    5.10    0.90
  -6  -6  10    6.23    1.50
  -6   6  10    6.11    1.12
   6   6 -10    4.00    1.42
   6   6 -10    5.14    1.37
  -6   6  10    8.57    1.87
  -6   6  10    4.18    1.38
  -6   6   9    0.47    0.45
  -6  -6   9   -0.12    0.99
  -6   6   9    2.40    1.52
   6   6  -9    0.73    1.11
  -6   6   9    1.99    1.11
   6   6  -9    0.49    0.97
  -6  -6   8   23.35    2.66
  -6  -6   8   25.65    3.05
  -6   6   8   22.50    2.09
  -6   6   8   18.57    2.58
   6   6  -8   21.66    2.63
   6   6  -8   23.99    2.46
  -6   6   8   21.99    1.41
  -6  -6   7  195.75    7.50
   6   6  -7  179.72    7.48
  -6  -6   7  190.60    7.95
  -6   6   7  189.79    6.45
  -6   6   7  181.89    7.95
   6   6  -7  191.84    7.51
   6   6  -7  183.25    6.76
  -6   6   7  181.29    4.35
   6   6  -6  603.73   15.06
  -6   6   6  628.79   13.82
  -6  -6   6  633.44   15.75
  -6  -6   6  638.56   16.14
  -6   6   6  689.66   16.46
  -6   6   6  616.07   10.59
   6   6  -6  613.81   14.86
   6   6  -6  591.89   13.90
  -6  -6   6  603.05   14.41
   6  -6  -6  656.30   10.26
  -6  -6   5  610.12   15.57
  -6   6   5  601.67   10.49
   6   6  -5  599.25   14.47
  -6  -6   5  590.72   13.71
   6  -6  -5  611.73   10.26
   6   6  -5  579.87   14.35
  -6   6   5  598.64   13.66
  -6  -6   5  623.16   15.20
  -6  -6   4   63.33    4.55
  -6   6   4   61.05    3.82
   6   6  -4   66.54    4.09
  -6  -6   4   70.05    4.37
   6   6  -4   64.53    4.11
  -6  -6   4   66.11    3.76
   6  -6  -4   67.01    2.68
   6   6  -3  647.52   15.15
  -6   6   3  651.82   14.65
  -6  -6   3  654.36   13.78
   6  -6  -3  668.20   12.18
   6   6  -3  644.06   14.74
  -6  -6   3  649.31   15.32
  -6   6   2   59.20    3.46
   6   6  -2   54.83    3.97
  -6  -6   2   62.54    4.68
  -6  -6   2   57.25    3.23
   6  -6  -2   57.68    2.95
  -6  -6   2   61.37    3.93
  -6   6   2   55.68    3.79
   6   6  -2   57.92    3.64
  -6   6   1   32.26    2.47
   6   6  -1   29.88    2.90
  -6  -6   1   30.47    2.20
   6  -6  -1   28.04    2.19
   6   6  -1   25.38    2.32
  -6   6   1   29.03    2.86
  -6  -6   1   31.13    2.67
   6  -6   0   60.54    4.31
   6   6   0   64.59    4.42
  -6   6   0   57.68    3.21
   6   6   0   62.61    3.57
  -6  -6   0   56.96    3.61
  -6   6   0   59.09    4.08
   6  -6   0   58.63    3.43
  -6  -6   0   60.31    3.03
   6   6   0   58.85    2.81
   6   6   1    3.11    0.73
  -6  -6  -1    3.23    0.82
  -6  -6  -1    2.87    1.06
   6  -6   1    3.79    1.12
  -6   6  -1    0.63    0.78
   6  -6   1    3.34    1.32
   6   6   1    2.37    1.27
  -6   6  -1    3.12    0.87
  -6   6  -1    3.71    1.11
   6  -6   1    3.43    1.28
   6   6   2 1286.76   20.21
  -6   6  -2 1283.88   25.32
  -6  -6  -2 1265.72   22.72
   6  -6   2 1305.20   23.50
   6  -6   2 1263.25   25.83
   6   6   2 1317.37   26.79
   6   6   2 1340.39   26.61
   6  -6   2 1233.54   23.88
  -6   6  -2 1327.53   21.88
  -6   6  -2 1329.01   23.61
  -6  -6  -2 1328.91   21.08
   6   6   3   28.08    1.71
  -6   6  -3   29.32    3.06
  -6  -6  -3   23.98    2.16
   6   6   3   28.22    3.33
   6  -6   3   28.46    3.11
   6  -6   3   28.00    2.50
   6   6   3   31.30    3.32
   6  -6   3   29.87    2.92
  -6   6  -3   29.57    2.24
  -6   6  -3   31.38    2.74
  -6  -6  -3   29.39    1.94
   6   6   4   -0.29    0.48
  -6   6  -4    0.73    0.89
  -6  -6  -4   -0.67    0.69
   6  -6   4   -1.91    1.31
   6   6   4    1.02    1.08
  -6   6  -4    1.21    0.95
   6  -6   4    0.97    0.97
  -6   6  -4   -0.06    0.80
   6  -6   4    0.87    0.87
  -6  -6  -4    0.37    0.45
  -6  -6  -5   52.69    2.90
  -6   6  -5   51.86    4.23
   6  -6   5   53.44    4.57
   6  -6   5   52.53    3.43
   6  -6   5   53.89    4.19
  -6  -6  -5   57.15    2.63
   6   6   5   55.91    4.65
  -6   6  -5   51.12    3.16
  -6   6  -5   50.50    3.66
   6   6   5   59.28    2.56
  -6  -6  -6  471.33    9.90
  -6   6  -6  440.76   13.45
   6  -6   6  463.61   14.24
   6  -6   6  442.34   11.41
   6  -6   6  439.23   13.52
  -6   6  -6  449.86   11.14
  -6   6  -6  429.59   11.99
  -6  -6  -7   25.31    1.79
   6  -6   7   23.55    3.19
   6  -6   7   20.37    2.85
  -6   6  -7   21.65    2.27
   6  -6   7   21.46    2.34
  -6   6  -7   19.53    2.34
   6   6   7   24.29    1.81
  -6   6  -8    0.03    1.15
  -6  -6  -8    0.47    0.50
   6  -6   8   -0.37    1.35
   6  -6   8    3.26    1.52
   6  -6   8   -0.14    0.90
  -6   6  -8   -1.73    1.11
   6   6   8    0.68    0.62
  -6  -6  -9  274.29    5.53
   6  -6   9  285.46   11.38
   6  -6   9  288.83   11.64
   6  -6   9  259.05    9.06
  -6   6  -9  279.73    9.26
  -6   6  -9  284.21   10.09
   6   6   9  278.85    7.45
   6  -6  10   23.83    3.47
   6  -6  10   18.69    2.99
  -6   6 -10   17.27    2.60
  -6   6 -10   22.88    2.95
  -6   6 -11   69.56    5.26
  -6  -6 -11   61.87    6.00
   6  -6  11   77.92    6.30
   6  -6  11   73.82    5.82
  -6   6 -11   71.06    4.92
   6   6  11   71.75    3.97
  -6   6 -12    2.96    1.86
  -6  -6 -12    4.47    2.43
   6  -6  12    3.78    2.10
   6  -6  12    3.43    1.72
  -6   6 -12    1.79    1.61
   6   6  12    4.91    1.46
  -6   6 -13   16.47    2.81
  -6  -6 -13   13.43    3.13
   6  -6  13   21.25    3.69
   6  -6  13   16.01    3.08
  -6   6 -13   13.60    2.47
   6   6  13   14.93    2.08
  -6   6 -14   -1.63    1.50
  -6  -6 -14    1.45    2.28
   6  -6  14    2.71    2.61
   6  -6  14    0.10    1.42
  -6   6 -14    2.02    1.57
   6   6  14    2.29    1.08
  -6   6 -15   -0.59    1.77
  -6  -6 -15    3.13    1.99
   6  -6  15    1.33    1.93
   6  -6  15   -1.58    1.35
  -6   6 -15    0.62    1.29
   6   6  15    2.65    1.36
  -6   6 -16   34.60    4.46
  -6   6 -16   31.81    4.18
   6   6  16   31.82    3.40
   6  -6  16   28.99    4.85
  -6  -6 -16   33.52    5.55
  -6   6 -17   10.64    2.75
  -6   6 -17    3.85    2.08
  -6  -6 -17    3.76    2.76
   6  -6  17    4.34    2.57
  -6   6 -18    4.52    2.40
  -6   6 -18    9.61    3.10
   6  -6  18    5.91    2.93
  -6  -6 -18    7.77    3.39
  -6   6 -19   16.75    3.55
  -6   6 -19   18.70    4.03
  -6  -6 -19   22.86    4.66
   6  -6  19   19.98    4.21
  -6  -8  19    2.34    2.22
   6   8 -19    2.90    1.95
   6   8 -19    1.39    2.21
  -6  -8  18    8.05    2.57
   6   8 -18   11.80    2.84
   6   8 -18    7.96    2.69
  -6  -8  17    3.80    1.52
   6   8 -17    1.29    1.94
   6   8 -17    2.71    1.71
  -6  -8  16    0.73    1.62
   6   8 -16    0.55    1.41
   6   8 -16    3.60    1.97
  -6  -8  15   11.82    2.89
   6   8 -15    8.62    2.59
   6   8 -15   17.16    3.01
   6   8 -14   11.16    2.60
   6   8 -14   13.71    2.83
  -6  -8  14   14.59    3.01
   6   8 -13    7.23    1.75
   6   8 -13    7.24    2.42
  -6  -8  12   45.59    5.00
   6   8 -12   39.15    3.86
   6   8 -12   43.30    4.46
  -6   8  11    1.15    0.67
   6   8 -11    4.11    1.52
   6   8 -11    2.93    1.62
   6   8 -10   66.18    4.91
  -6   8  10   64.13    3.69
  -6  -8  10   77.53    6.02
   6   8 -10   63.89    4.90
   6   8  -9   78.19    5.11
  -6   8   9   80.54    4.24
  -6  -8   9   88.93    6.30
   6   8  -9   76.90    5.43
   6   8  -8   15.91    2.38
  -6   8   8   15.52    1.97
  -6  -8   8   20.06    2.96
   6   8  -8   15.63    2.59
   6   8  -7   86.98    5.28
  -6  -8   7   86.98    6.09
  -6   8   7   97.07    4.98
   6   8  -7   84.82    5.62
  -6  -8   6   79.99    5.59
  -6   8   6   72.55    4.43
   6   8  -6   84.03    5.55
   6   8  -6   71.69    4.66
  -6  -8   6   79.77    4.88
   6   8  -5   19.53    2.72
  -6   8   5   21.75    3.00
  -6  -8   5   25.99    2.73
   6  -8  -5   21.56    1.10
  -6  -8   5   23.22    3.14
  -6   8   5   22.61    2.58
   6   8  -4  111.44    6.28
  -6  -8   4  105.84    6.18
  -6   8   4  102.27    5.55
   6  -8  -4  113.99    3.54
  -6   8   4  116.54    6.36
  -6  -8   3  214.49    8.94
  -6   8   3  213.51    8.37
  -6  -8   3  230.63    7.64
   6  -8  -3  221.19    6.04
  -6   8   3  228.82    8.57
   6   8  -3  220.92    8.91
   6   8  -2   40.82    3.48
  -6  -8   2   47.77    4.02
  -6   8   2   40.26    3.66
  -6   8   2   42.01    3.36
   6   8  -2   45.41    3.98
  -6  -8   2   42.37    3.01
   6  -8  -2   46.02    2.79
  -6   8   1   16.04    2.42
   6   8  -1   17.49    2.24
  -6  -8   1   18.14    2.48
   6   8  -1   20.98    2.98
  -6   8   1   19.26    2.25
   6  -8  -1   15.57    2.49
  -6  -8   1   19.04    1.94
   6  -8  -1   18.69    1.89
   6   8   0   15.12    2.06
  -6  -8   0   20.56    2.55
  -6   8   0   12.81    2.24
   6  -8   0   19.48    2.85
   6   8   0   16.53    2.73
  -6   8   0   18.31    2.17
   6  -8   0   21.25    2.36
  -6  -8   0   16.44    1.73
   6   8   1   66.48    4.10
  -6  -8  -1   73.79    4.65
   6   8   1   80.15    5.61
   6  -8   1   69.78    5.28
   6  -8   1   75.43    4.40
  -6   8  -1   76.12    4.25
  -6   8  -1   65.61    4.39
  -6  -8  -1   74.13    3.50
  -6  -8  -2   72.74    4.52
   6   8   2   63.57    5.15
   6  -8   2   69.76    5.38
   6  -8   2   68.98    4.87
   6  -8   2   67.13    4.36
  -6   8  -2   65.62    3.92
  -6   8  -2   71.64    4.62
  -6  -8  -2   65.26    3.12
  -6  -8  -3   43.29    3.42
   6   8   3   52.47    4.93
   6  -8   3   50.76    4.75
   6  -8   3   50.11    4.09
   6  -8   3   54.68    4.13
  -6   8  -3   48.51    3.40
  -6   8  -3   51.42    3.95
  -6  -8  -3   50.38    2.48
   6  -8   4  115.01    6.14
   6  -8   4  118.68    7.40
   6   8   4  134.31    8.02
  -6  -8  -4  110.56    3.48
   6  -8   4  111.74    6.20
  -6   8  -4  115.56    5.37
  -6   8  -4  117.04    6.06
  -6  -8  -4  122.29    5.56
  -6  -8  -5    6.91    1.44
   6   8   5    6.08    2.30
   6  -8   5    7.02    2.04
   6  -8   5    8.82    1.97
  -6   8  -5    4.53    1.20
  -6   8  -5    4.95    1.62
   6  -8   5    6.21    1.96
   6  -8   6  468.82   13.62
   6  -8   6  476.04   14.89
  -6   8  -6  488.28   12.68
  -6   8  -6  485.35   13.88
  -6  -8  -6  488.74   11.92
  -6   8  -7   10.81    1.84
   6  -8   7   12.68    2.35
  -6  -8  -7   13.03    1.67
   6  -8   7   13.53    2.77
  -6   8  -7   14.87    2.45
  -6   8  -8    6.85    1.66
   6  -8   8    8.79    2.26
  -6  -8  -8    8.26    1.35
   6  -8   8    8.39    2.55
  -6   8  -8    5.71    1.76
   6  -8   9    7.56    2.26
  -6  -8  -9    8.17    1.17
   6  -8   9    8.44    2.50
  -6   8  -9    7.22    1.72
  -6   8  -9   11.71    2.35
  -6   8 -10    0.64    1.36
   6  -8  10    2.00    1.70
   6  -8  10   -0.41    1.62
  -6   8 -10    1.82    1.36
   6   8  10    2.18    0.48
   6  -8  11   17.21    3.28
  -6   8 -11    9.14    2.13
  -6   8 -11   15.47    2.78
   6  -8  11   12.86    2.96
   6  -8  12   22.71    3.80
  -6   8 -12   19.29    3.17
  -6   8 -12   31.56    3.90
   6  -8  12   31.40    4.55
   6  -8  13   20.30    3.85
  -6   8 -13   16.05    2.76
  -6   8 -13   18.69    3.39
   6  -8  13   16.38    3.37
   6  -8  14   27.40    4.16
  -6   8 -14   22.39    3.37
  -6   8 -14   27.10    4.00
   6  -8  14   25.01    4.31
   6  -8  15    8.39    2.50
  -6   8 -15    7.86    2.00
  -6   8 -15    8.38    2.67
   6  -8  15    7.34    2.94
   6  -8  16   19.64    3.74
  -6   8 -16   16.55    3.47
  -6   8 -16   20.19    3.87
   6  -8  16   18.99    4.26
  -6   8 -17   20.89    3.62
  -6   8 -17   22.12    4.05
   6  -8  17   21.45    4.52
  -6 -10  17   25.69    4.53
   6  10 -17   18.81    3.79
   6  10 -17   25.42    4.30
  -6 -10  16   -0.27    1.81
   6  10 -16   -0.67    1.68
   6  10 -16    1.48    1.68
   6  10 -15   24.52    3.80
  -6 -10  15   28.29    4.55
   6  10 -15   24.85    3.82
   6  10 -14   12.72    2.98
  -6 -10  14   14.62    3.82
   6  10 -14   14.50    3.00
   6  10 -13   41.23    4.75
  -6 -10  13   37.16    5.11
   6  10 -13   34.31    4.14
   6  10 -12   49.81    4.87
  -6 -10  12   61.40    6.30
   6  10 -12   51.98    5.23
   6  10 -11  151.32    8.21
  -6 -10  11  172.24   10.36
   6  10 -11  149.43    8.50
   6  10 -10   79.78    5.79
  -6 -10  10   92.03    7.34
   6  10 -10   85.62    6.52
   6  10  -9   64.90    5.31
  -6 -10   9   69.76    6.36
   6  10  -9   70.39    5.67
  -6  10   8    0.88    1.77
   6  10  -8    1.80    1.72
  -6 -10   8    3.04    1.81
  -6  10   8   -0.46    0.96
   6  10  -8    1.12    1.39
  -6  10   7   26.16    3.93
   6  10  -7   22.02    3.04
  -6  10   7   18.71    2.52
  -6 -10   7   22.76    3.87
   6  10  -7   19.89    3.16
  -6  10   6  153.67    8.58
   6  10  -6  134.58    7.56
   6  10  -6  124.25    7.02
  -6 -10   6  138.85    8.41
   6  10  -5   43.05    4.29
  -6 -10   5   38.60    3.59
  -6 -10   5   40.38    4.57
  -6  10   5   42.46    4.26
   6  10  -4   -2.05    1.61
  -6 -10   4   -0.19    1.27
  -6  10   4   -1.20    1.24
   6 -10  -4    0.19    0.37
  -6 -10   4    1.09    1.05
   6 -10  -4    0.41    0.37
   6  10  -3  107.14    7.04
  -6  10   3  120.07    6.71
  -6 -10   3  105.44    7.04
   6 -10  -3  116.11    4.10
  -6 -10   3  101.11    5.32
   6  10  -2 2448.90   43.59
  -6  10   2 2378.22   41.29
  -6 -10   2 2373.94   43.64
   6 -10  -2 2394.39   36.51
  -6 -10   1    5.45    1.30
  -6  10   1    9.99    2.24
   6  10  -1    7.12    2.04
  -6 -10   1    7.16    2.19
   6 -10  -1    4.14    1.29
   6 -10   0   16.13    2.98
  -6 -10   0   16.43    1.84
   6  10   0   14.47    2.90
  -6  10   0   18.34    2.44
  -6 -10   0   21.80    3.05
   6 -10   0   21.40    2.54
  -6 -10  -1    6.57    1.89
   6  10   1    7.29    2.18
   6 -10   1    3.76    1.72
   6 -10   1    5.76    1.49
  -6  10  -1    5.92    1.61
  -6  10  -1    9.51    2.00
  -6 -10  -1    5.76    1.23
  -6  10  -2    0.46    1.09
  -6 -10  -2   -0.08    1.51
   6  10   2    0.61    1.57
   6 -10   2   -1.05    1.63
  -6  10  -2    2.56    1.83
   6 -10   2    1.44    1.20
  -6 -10  -2    0.69    0.57
  -6  10  -3   26.06    2.87
  -6 -10  -3   23.22    2.91
   6  10   3   21.95    3.53
   6 -10   3   23.67    3.73
  -6  10  -3   25.99    3.25
   6 -10   3   26.90    3.21
  -6 -10  -3   20.18    1.34
   6  10   4   13.33    2.88
   6 -10   4    9.29    2.71
  -6 -10  -4   13.38    2.26
  -6  10  -4   14.88    2.25
  -6  10  -4   10.10    2.05
   6 -10   4   10.03    2.04
   6 -10   5   49.37    5.48
   6  10   5   55.12    5.88
   6 -10   5   40.40    4.22
  -6  10  -5   46.74    3.91
  -6  10  -5   39.88    4.02
  -6 -10  -5   48.82    4.08
   6 -10   6  110.93    8.06
   6  10   6  104.96    8.27
   6 -10   6  115.90    7.26
  -6  10  -6  113.40    6.17
  -6  10  -6  105.52    6.75
  -6 -10  -6  108.66    5.98
  -6 -10  -7   21.79    2.57
   6  10   7   25.60    4.54
   6 -10   7   22.27    3.93
  -6  10  -7   24.49    2.98
  -6  10  -7   20.58    3.02
   6 -10   7   24.21    3.56
  -6  10  -8   55.84    4.45
   6 -10   8   52.26    5.35
  -6  10  -8   55.58    4.94
  -6 -10  -8   56.33    3.93
   6 -10   8   49.64    5.80
   6  10   8   61.75    6.34
  -6 -10  -9   -0.97    0.89
   6 -10   9    0.04    2.01
  -6  10  -9    2.79    1.79
   6 -10   9    2.58    2.00
  -6  10  -9   -1.09    1.24
   6 -10  10   -0.71    1.67
  -6  10 -10    1.51    1.30
   6 -10  10   -0.87    1.72
  -6  10 -10    3.98    1.67
   6 -10  11   46.72    5.69
  -6  10 -11   47.92    4.51
  -6  10 -11   36.22    4.46
   6 -10  11   35.65    4.89
   6 -10  12   -0.43    2.10
  -6  10 -12    3.62    1.85
   6 -10  12    0.55    1.75
  -6  10 -12    0.64    1.66
   6 -10  13    0.16    2.04
  -6  10 -13    1.20    1.80
   6 -10  13    5.46    2.76
  -6  10 -13    4.82    2.15
   6 -10  14    8.51    3.09
  -6  10 -14   16.15    3.07
   6 -10  14   20.63    4.42
  -6  10 -14    9.86    2.77
   6 -10  15    6.67    2.66
  -6  10 -15    5.52    2.65
  -6  10 -15    4.28    2.44
   6 -10  15    8.67    3.69
   6  12 -13   -0.04    1.65
   6  12 -13    0.92    1.74
  -6 -12  13    2.09    2.00
   6  12 -12   24.38    3.97
   6  12 -12   25.38    3.76
  -6 -12  12   24.54    4.58
  -6  12  12   18.86    4.27
   6  12 -11    8.00    2.47
   6  12 -11    7.33    2.46
  -6 -12  11   12.61    3.43
  -6  12  11    8.47    3.13
   6  12 -10   47.81    5.31
   6  12 -10   53.31    5.35
  -6 -12  10   52.12    6.26
  -6  12  10   69.50    6.98
   6  12  -9   -1.42    1.45
   6  12  -9    1.52    1.62
  -6  12   9    1.08    1.83
  -6 -12   9    2.78    2.30
   6  12  -8    7.53    2.46
  -6 -12   8    9.99    3.08
   6  12  -8    5.93    2.07
   6  12  -7    0.32    1.42
  -6 -12   7    4.60    2.51
  -6  12   7    2.89    1.92
   6  12  -7    6.74    2.33
   6  12  -6    2.41    1.75
   6  12  -6    2.48    1.67
  -6 -12   6    2.26    1.72
  -6  12   6    1.59    1.53
  -6  12   5   41.75    4.66
  -6 -12   5   48.30    5.43
   6  12  -5   43.78    4.86
  -6 -12   4    5.29    1.97
   6  12  -4    3.02    1.92
  -6 -12   3   15.55    2.96
  -6  12   3   20.62    3.13
   6  12  -3   24.01    3.61
   6  12  -2   98.20    7.23
  -6  12   2  106.76    6.81
  -6 -12   2   95.30    7.34
   6  12  -1    4.03    1.83
  -6  12   1    2.52    1.72
  -6 -12   1   -1.12    1.73
   6 -12  -1    0.68    0.94
   6  12   0    3.88    1.98
  -6  12   0    1.68    1.35
  -6 -12   0    0.31    1.53
   6 -12   0    2.40    1.83
   6 -12   0    3.99    1.34
   6  12   1    9.32    2.73
  -6  12  -1    2.82    1.59
  -6 -12  -1    3.18    1.85
   6 -12   1    3.28    2.25
  -6  12  -1    3.21    1.57
   6 -12   1    5.13    1.53
  -6  12  -2   84.20    5.70
   6 -12   2   88.15    7.48
   6  12   2   81.70    6.91
  -6  12  -2   81.50    6.22
   6 -12   2   82.72    5.65
  -6  12  -3   -0.37    1.24
  -6 -12  -3    4.68    2.03
   6 -12   3    0.86    2.23
   6  12   3   -2.21    2.20
  -6  12  -3   -0.88    1.39
   6 -12   3    0.82    1.44
  -6 -12  -4    1.27    1.30
   6  12   4    5.67    2.59
   6 -12   4    5.32    2.61
  -6  12  -4    4.16    2.25
   6 -12   4    2.24    1.65
  -6  12  -4    1.95    1.25
  -6 -12  -5    0.69    1.61
   6  12   5    3.74    2.51
   6 -12   5    2.89    1.91
  -6  12  -5   -0.62    1.15
  -6  12  -5    1.41    1.47
   6 -12   5    3.55    1.90
  -6  12  -6   47.51    4.56
   6 -12   6   48.06    5.11
  -6  12  -6   46.51    4.90
  -6 -12  -6   42.03    4.32
   6  12   6   48.87    5.94
   6 -12   6   44.98    5.80
  -6  12  -7   29.81    3.67
  -6  12  -7   32.60    4.12
  -6 -12  -7   27.29    3.38
   6 -12   7   32.74    5.05
   6 -12   7   26.59    4.03
  -6  12  -8   -0.28    1.33
  -6  12  -8   -0.43    1.80
   6 -12   8   -3.36    2.64
   6  12   8    0.58    2.15
   6 -12   8    2.68    2.33
  -6  12  -9    5.30    1.97
  -6  12  -9    6.53    2.33
   6  12   9    4.29    2.75
   6 -12   9    5.77    2.32
   6 -12   9    3.51    2.49
  -6  12 -10   30.01    4.12
   6  12  10   47.94    6.55
   6 -12  10   37.54    5.69
   6 -12  10   33.65    4.87
  -6  12 -10   37.62    4.75
   6  12  11    6.70    2.99
   6 -12  11   15.05    4.17
  -6  12 -11   10.41    2.74
   6 -12  11   10.67    3.28
  -6  12 -11    8.16    2.79
   6  12  12   -0.79    2.21
   6 -12  12    2.07    2.31
  -6  12 -12   -1.11    1.79
  -6  12 -12    1.86    2.03
   6 -12  12    1.50    2.45
   6  14  -7   41.08    4.99
   6  14  -7   47.89    5.45
  -6  14   7   52.30    6.01
  -6 -14   7   48.93    6.50
   6  14  -6   91.96    7.48
  -6  14   6   92.06    7.54
   6  14  -6   79.46    6.95
  -6 -14   6   82.95    8.14
   6  14  -5   48.70    5.51
  -6 -14   5   49.71    6.34
  -6  14   5   54.42    5.86
   6  14  -5   46.34    5.43
  -6 -14   4   13.81    3.44
  -6  14   4   13.73    2.98
   6  14  -4   13.24    3.21
  -6 -14   3   10.68    2.83
   6  14  -3   13.53    3.18
  -6  14   3   11.60    2.71
  -6 -14   2   30.51    4.67
  -6  14   2   26.72    3.81
   6  14  -2   28.79    4.44
  -6  14   1    4.59    2.05
  -6 -14   1    2.10    1.98
  -6  14   1    7.72    2.35
   6  14  -1    5.88    3.14
  -6  14   0   34.90    4.57
  -6 -14   0   29.18    4.53
   6  14   0   32.97    5.00
  -6  14   0   31.27    4.05
  -6  14  -1    5.08    2.49
  -6 -14  -1    0.39    1.61
   6  14   1    4.10    2.49
  -6  14  -1    0.18    1.58
  -6  14  -2   84.99    7.05
  -6 -14  -2   80.35    6.98
   6  14   2   91.85    7.98
  -6  14  -2   84.75    6.44
  -6  14  -3   28.81    4.28
  -6  14  -3   32.46    4.07
   6  14   3   40.21    5.61
  -6 -14  -3   38.66    4.99
   6 -14   3   43.03    5.93
  -6  14  -4    1.15    1.39
  -6  14  -4    4.44    2.34
   6  14   4    4.11    2.73
  -6 -14  -4    4.41    2.14
   6 -14   4    1.76    2.52
  -6  14  -5    0.41    1.62
  -6  14  -5    2.85    2.07
   6  14   5    3.29    2.41
   6 -14   5    1.27    2.39
  -6  14  -6    8.27    2.38
  -6  14  -6   16.10    3.33
   6  14   6   16.63    3.99
   6 -14   6   18.85    4.43
   7  -1 -23    1.33    2.56
   7   1 -23    0.42    1.75
   7   1 -23   -1.48    2.25
   7   1 -22   64.96    6.44
   7  -1 -22   49.69    5.97
   7   1 -22   66.30    6.61
   7  -1 -21    4.23    2.43
   7   1 -21    1.18    1.59
   7   1 -21    5.05    2.39
   7   1 -20    6.44    2.15
   7  -1 -20    9.11    2.68
   7   1 -20    7.69    3.07
  -7  -1  20    8.06    1.70
   7   1 -19    1.84    2.02
  -7  -1  19    1.74    1.19
   7   1 -19   -0.88    1.50
   7  -1 -19    2.13    1.60
  -7   1  18   52.40    3.27
  -7  -1  18   60.89    4.20
   7  -1 -18   56.71    5.30
   7   1 -18   55.49    5.29
   7   1 -18   51.71    4.73
   7  -1 -18   63.18    5.52
   7  -1 -17   42.52    4.40
   7   1 -17   35.64    4.14
  -7   1  17   41.77    2.86
  -7  -1  17   41.59    3.35
   7  -1 -17   40.68    4.37
   7   1 -16   -2.04    1.38
   7  -1 -16    0.23    1.30
  -7   1  16    0.75    0.66
  -7  -1  16    0.84    0.81
   7  -1 -16    2.27    1.70
   7   1 -16   -1.73    1.34
  -7   1  15  103.10    4.34
  -7  -1  15  103.86    5.04
   7  -1 -15   99.69    6.00
   7   1 -15  105.86    6.41
   7  -1 -15  103.11    6.25
  -7   1  15   91.82    4.91
  -7  -1  15   93.10    4.87
   7   1 -15   99.89    5.64
  -7   1  14   24.28    2.00
  -7  -1  14   25.74    2.41
  -7   1  14   22.64    2.70
   7  -1 -14   22.22    2.78
   7  -1 -14   24.69    3.04
   7   1 -14   23.50    3.03
  -7  -1  14   21.15    2.25
  -7   1  14   25.32    2.51
   7   1 -14   24.46    2.75
  -7   1  13  153.94    5.23
  -7  -1  13  148.92    5.91
   7  -1 -13  161.02    6.93
  -7   1  13  156.11    6.68
   7   1 -13  153.75    7.13
   7  -1 -13  171.43    7.39
   7   1 -13  152.59    6.28
  -7  -1  13  161.76    5.89
  -7   1  13  163.25    5.99
  -7  -1  12   32.10    2.62
  -7   1  12   38.28    2.45
   7  -1 -12   37.68    3.08
  -7   1  12   37.88    3.08
  -7  -1  12   30.92    3.02
  -7   1  12   33.14    3.00
  -7  -1  12   30.24    2.92
   7   1 -12   31.47    3.15
   7  -1 -12   37.11    3.32
  -7  -1  12   34.44    2.57
  -7   1  12   37.31    2.66
   7   1 -12   36.14    2.86
  -7   1  11    2.78    0.72
  -7  -1  11    3.36    0.94
   7  -1 -11    3.20    0.99
  -7  -1  11    4.69    1.23
  -7   1  11    3.19    0.81
  -7  -1  11    2.77    0.91
  -7   1  11    1.95    1.07
   7  -1 -11    4.06    1.28
   7   1 -11    2.57    1.12
  -7  -1  11    2.61    0.80
  -7   1  11    4.16    0.95
   7   1 -11    3.79    0.89
  -7  -1  10  255.50    7.47
   7  -1 -10  246.82    7.45
  -7   1  10  241.03    7.60
  -7  -1  10  257.09    8.26
  -7  -1  10  253.95    7.94
  -7   1  10  256.32    7.99
   7   1 -10  255.52    8.44
  -7  -1  10  264.02    6.72
   7  -1 -10  237.33    7.98
   7   1 -10  253.58    6.96
  -7   1  10  259.60    6.71
  -7  -1   9    0.27    0.68
   7  -1  -9   -0.31    0.69
  -7  -1   9   -0.51    0.66
  -7  -1   9   -0.04    0.72
   7  -1  -9   -0.10    0.72
  -7   1   9    0.21    0.68
   7   1  -9   -0.79    0.91
  -7  -1   9    0.14    0.56
  -7   1   9    1.07    0.62
   7   1  -9   -0.94    0.63
  -7  -1   8  313.34    8.02
   7  -1  -8  314.76    7.65
   7  -1  -8  312.85    8.08
  -7  -1   8  311.85    8.71
  -7   1   8  313.62    8.21
  -7  -1   8  310.80    8.26
  -7   1   8  322.19    8.18
   7   1  -8  323.18    8.41
  -7  -1   8  308.08    6.73
   7  -1  -8  322.67    8.36
   7   1  -8  310.68    6.94
  -7   1   8  315.73    6.83
  -7  -1   7   32.61    2.26
   7  -1  -7   31.37    1.97
   7   1  -7   35.24    1.80
  -7   1   7   30.89    1.64
   7   1  -7   32.71    2.37
  -7   1   7   29.48    2.14
  -7  -1   7   32.08    2.27
  -7  -1   7   33.95    1.72
   7  -1  -7   32.57    2.32
  -7  -1   7   35.00    2.54
  -7   1   7   31.21    2.26
   7  -1  -7   34.07    2.31
   7   1  -7   31.48    2.42
   7  -1  -6    0.50    0.57
   7   1  -6    0.69    0.38
  -7   1   6    0.65    0.30
  -7  -1   6    0.99    0.37
  -7   1   6    0.19    0.57
   7  -1  -6    0.30    0.53
   7  -1  -6   -0.70    0.73
   7   1  -6    0.22    0.69
  -7   1   6    0.70    0.62
  -7  -1   6    0.82    0.63
  -7  -1   6    2.09    0.74
   7   1  -6    1.19    0.73
   7   1  -5  113.49    2.73
  -7   1   5  111.54    2.71
   7   1  -5  118.30    3.94
  -7   1   5  111.98    3.53
  -7  -1   5  113.08    3.91
   7  -1  -5  115.03    3.61
  -7  -1   5  121.54    4.49
   7   1  -5  107.76    4.21
  -7   1   5  111.89    4.16
   7  -1  -5  120.00    4.18
  -7   1   4  325.92    7.63
  -7   1   4  317.50    5.34
   7   1  -4  307.49    5.33
   7  -1  -4  328.20    6.34
  -7  -1   4  313.52    7.78
   7  -1  -4  312.98    7.39
  -7   1   4  318.02    6.20
   7   1  -4  316.27    6.84
  -7  -1   4  308.30    6.91
  -7  -1   3   14.23    1.25
   7   1  -3   14.40    1.23
  -7   1   3   11.71    0.78
   7  -1  -3   10.65    0.80
  -7   1   3   13.58    1.37
   7  -1  -3   11.86    1.29
  -7  -1   3   10.38    1.30
   7   1  -3   15.15    1.49
   7  -1  -2  554.34   11.02
  -7   1   2  542.96   11.08
  -7  -1   2  572.12   11.29
  -7  -1   2  562.64   10.29
   7   1  -2  571.29    9.42
   7   1  -2  588.46   10.04
  -7   1   2  586.88    8.40
   7  -1  -2  572.12    8.42
  -7   1   2  556.90    8.38
   7   1  -2  569.49   11.16
  -7   1   1 3647.81   46.34
  -7  -1   1 3405.92   47.41
   7   1  -1 3427.11   47.21
   7   1  -1 3331.91   47.65
  -7  -1   1 3362.53   48.21
   7  -1  -1 3590.11   46.32
   7   1  -1 3297.26   48.83
  -7  -1   1 3405.60   49.34
  -7   1   1 3305.63   49.25
   7  -1  -1 3259.07   49.07
  -7  -1   0  436.08    8.75
   7   1   0  440.96    8.39
   7   1   0  429.48    8.83
  -7   1   0  466.65    7.92
   7  -1   0  467.78    7.84
  -7  -1   0  438.69    9.51
   7  -1   0  450.18    9.91
   7   1   0  424.59    9.38
  -7   1   0  443.84    9.77
   7  -1   1  100.73    3.05
  -7   1  -1   93.51    3.04
   7  -1   1   96.55    2.23
  -7   1  -1   93.62    4.03
  -7  -1  -1   97.51    3.89
   7  -1   1   90.45    4.00
   7   1   1   90.11    3.70
  -7  -1  -1   94.03    3.56
   7  -1   2   12.60    1.13
   7   1   2   13.67    1.32
  -7   1  -2   13.31    1.28
   7  -1   2   12.51    0.92
   7  -1   2   11.23    1.52
  -7  -1  -2   13.27    1.60
  -7   1  -2   12.72    1.60
   7   1   2   11.96    1.49
  -7  -1  -2   11.94    1.44
  -7   1  -3  648.35   12.25
   7  -1   3  666.92   12.15
   7   1   3  648.29   12.61
  -7  -1  -3  656.90   13.25
  -7  -1  -3  654.98   13.31
  -7   1  -3  667.54   14.03
   7  -1   3  670.51   11.17
   7  -1   3  655.62   13.87
   7   1   3  644.79   13.25
  -7   1  -4   33.77    2.32
   7   1   4   27.15    2.12
   7  -1   4   34.39    2.27
  -7  -1  -4   30.43    2.48
  -7   1  -4   34.83    2.75
   7  -1   4   31.79    2.63
  -7  -1  -4   31.37    2.47
  -7   1  -4   32.33    2.37
  -7   1  -4   32.85    1.94
   7  -1   4   32.38    1.91
   7   1   4   29.95    2.34
  -7   1  -5   29.78    2.37
   7  -1   5   29.44    2.27
   7   1   5   31.84    2.43
  -7  -1  -5   25.86    2.40
   7  -1   5   27.55    2.68
  -7  -1  -5   26.75    2.44
  -7   1  -5   33.16    2.52
   7  -1   5   30.43    2.05
  -7   1  -5   24.81    1.83
   7   1   5   28.87    2.21
   7   1   5   31.63    2.63
   7  -1   6  849.33   16.08
  -7   1  -6  823.79   16.32
   7   1   6  819.72   16.31
  -7   1  -6  822.73   16.09
   7  -1   6  814.37   17.64
  -7  -1  -6  830.92   17.20
   7  -1   6  820.50   15.13
   7   1   6  816.65   15.89
  -7   1  -6  819.30   15.27
   7   1   6  799.67   16.82
  -7   1  -7  491.04   11.48
  -7  -1  -7  531.33   10.42
  -7  -1  -7  495.42   12.79
   7   1   7  476.31   12.37
   7  -1   7  497.64   13.17
   7  -1   7  487.23   11.02
   7   1   7  501.34   11.66
  -7   1  -7  497.78   11.20
   7   1   7  502.53   12.02
  -7   1  -7  498.16   12.11
  -7  -1  -8   92.54    3.63
  -7  -1  -8   89.04    5.15
   7   1   8   90.47    5.00
   7  -1   8   84.58    5.22
   7  -1   8   85.18    4.32
   7   1   8   90.68    4.70
  -7   1  -8   87.80    4.34
   7  -1   8   92.34    4.76
  -7   1  -8   92.96    4.99
   7   1   8   85.32    4.63
   7  -1   9    1.19    1.05
  -7   1  -9   -3.47    1.21
   7   1   9    1.68    1.17
  -7   1  -9   -0.44    0.69
  -7  -1  -9    0.48    0.56
   7   1   9   -0.36    1.10
   7  -1   9    0.00    0.96
   7  -1   9   -0.30    0.69
   7   1   9    1.10    1.02
  -7   1  -9    1.17    1.00
  -7  -1  -9    0.30    1.10
  -7  -1 -10   60.91    4.60
   7   1  10   64.99    4.58
   7  -1  10   62.31    4.77
  -7  -1 -10   66.44    3.06
  -7   1 -10   61.52    3.65
   7  -1  10   62.27    3.91
   7   1  10   61.05    4.15
  -7   1 -10   55.90    3.91
   7  -1  10   59.81    4.07
  -7   1 -10   53.92    4.12
   7   1  10   58.40    4.13
  -7  -1 -11   73.40    5.49
   7   1  11   71.53    5.04
   7  -1  11   79.78    5.60
  -7  -1 -11   74.18    3.26
  -7   1 -11   75.72    4.12
   7  -1  11   78.76    4.70
  -7   1 -11   79.18    4.82
  -7   1 -11   78.32    5.21
   7  -1  12    0.02    1.23
   7   1  12   -0.80    1.05
  -7   1 -12    1.20    1.55
  -7  -1 -12    0.38    1.25
  -7   1 -12    0.71    0.79
  -7  -1 -12   -0.25    0.47
   7   1  13   23.31    3.31
   7  -1  13   17.80    3.14
  -7   1 -13   21.47    3.26
  -7  -1 -13   13.78    2.73
  -7  -1 -13   15.47    1.46
  -7   1 -13   18.56    2.17
   7   1  14   31.99    3.76
   7  -1  14   33.85    4.16
  -7  -1 -14   28.94    3.85
  -7   1 -14   32.29    3.98
  -7  -1 -14   30.88    2.00
  -7   1 -14   29.94    2.60
   7  -1  15  240.76   11.29
  -7  -1 -15  243.74   11.72
   7   1  15  217.65   10.43
  -7  -1 -15  207.60    5.57
  -7   1 -15  200.10    7.34
  -7   1 -15  241.75   11.12
  -7   1 -16  116.58    8.03
  -7  -1 -16  115.22    8.47
   7  -1  16  117.41    8.19
   7   1  16  110.82    7.53
   7  -1  17    6.48    2.40
   7   1  17    3.22    1.75
  -7   1 -17    4.56    2.12
  -7  -1 -17    8.50    2.97
   7  -1  18   19.33    4.00
   7   1  18   21.27    3.69
  -7   1 -18   20.63    3.86
  -7  -1 -18   19.86    4.08
  -7   1 -19  116.07    9.06
  -7  -1 -19  116.65    9.55
   7  -1  19  112.60    8.90
   7   1  19  103.86    8.12
   7  -1  20    7.04    2.85
   7   1  20    6.84    2.85
  -7   1 -20    2.56    2.51
  -7  -1 -20    4.40    2.53
   7  -1  21   98.26    8.90
  -7  -1 -21  105.83    9.72
   7   1  21  112.66    8.95
  -7   1 -21  130.37   10.34
   7   3 -22    0.35    1.68
   7  -3 -22    2.32    2.34
   7   3 -22   -0.25    1.74
   7  -3 -21   11.58    3.17
   7   3 -21    8.84    2.55
  -7  -3  21    6.77    2.00
   7   3 -21   12.02    3.15
   7   3 -20    0.52    1.46
   7  -3 -20    2.60    2.29
   7   3 -20    2.53    2.25
  -7  -3  20   -0.64    1.11
   7   3 -19   -0.66    1.54
  -7  -3  19    0.25    1.07
   7   3 -19   -0.63    1.25
   7  -3 -19    1.30    1.69
   7   3 -18   11.71    2.68
  -7  -3  18   15.77    2.52
   7   3 -18   16.74    2.82
   7  -3 -18   16.15    3.21
  -7   3  17    7.33    0.89
  -7  -3  17    7.63    1.85
   7   3 -17    9.29    2.64
   7   3 -17    6.07    1.85
   7  -3 -17    6.95    2.28
  -7  -3  16    4.98    1.63
  -7   3  16    3.05    0.67
   7   3 -16    3.73    2.13
   7   3 -16    4.25    1.62
   7  -3 -16    4.49    1.91
  -7  -3  15   43.49    3.73
  -7   3  15   46.81    2.26
   7  -3 -15   38.94    4.11
   7   3 -15   45.88    4.42
   7   3 -15   40.25    3.64
  -7   3  15   38.65    3.42
  -7   3  14   18.16    1.49
  -7  -3  14   19.84    2.56
   7  -3 -14   19.95    2.87
  -7   3  14   18.11    2.29
   7   3 -14   18.72    2.80
  -7  -3  14   19.05    2.30
   7   3 -14   20.05    2.42
  -7   3  14   17.17    2.25
  -7   3  13   71.70    2.95
  -7  -3  13   68.05    4.48
   7  -3 -13   71.50    5.18
  -7   3  13   65.58    4.12
   7   3 -13   61.73    5.07
  -7  -3  13   64.43    3.93
  -7   3  13   61.58    3.93
   7   3 -13   62.88    3.97
  -7  -3  12   62.08    4.17
   7  -3 -12   72.86    4.95
  -7   3  12   62.45    3.75
   7   3 -12   57.61    4.49
  -7   3  12   62.95    4.26
  -7  -3  12   61.95    3.65
  -7   3  12   71.76    4.02
   7   3 -12   64.92    3.84
  -7  -3  11   87.98    4.87
   7  -3 -11   88.05    5.05
  -7  -3  11   81.63    5.04
  -7   3  11   86.07    4.20
  -7  -3  11   78.11    4.68
   7   3 -11   88.22    5.01
  -7   3  11   82.04    4.58
  -7  -3  11   84.39    4.08
   7   3 -11   80.89    4.10
  -7   3  11   86.08    4.26
  -7  -3  10   14.16    1.95
   7  -3 -10   15.13    2.13
  -7   3  10   13.45    1.69
  -7  -3  10   15.63    2.11
  -7   3  10   15.81    1.77
  -7  -3  10   17.79    2.32
   7   3 -10   14.05    2.00
  -7   3  10   16.12    1.99
  -7  -3  10   13.00    1.66
   7   3 -10   15.71    1.78
  -7  -3   9  110.51    5.20
  -7   3   9  114.01    4.54
  -7  -3   9  115.34    5.59
  -7  -3   9  107.02    5.18
   7   3  -9  110.22    5.29
  -7   3   9  119.03    5.03
   7   3  -9  110.90    4.31
  -7   3   9  118.63    4.73
  -7  -3   8    9.48    1.58
  -7   3   8    9.15    1.36
   7  -3  -8    9.91    1.29
  -7   3   8    8.36    1.21
  -7  -3   8   10.98    1.75
  -7  -3   8   10.25    1.61
   7   3  -8    9.20    1.69
  -7   3   8    9.83    1.46
   7   3  -8    7.86    1.14
  -7   3   7   60.58    3.28
  -7  -3   7   70.39    3.90
  -7  -3   7   65.47    3.77
   7   3  -7   63.00    3.61
  -7   3   7   66.19    3.30
   7   3  -7   67.86    3.06
  -7  -3   7   75.22    4.07
   7  -3  -7   67.54    2.96
  -7   3   7   63.52    3.15
  -7  -3   6   65.06    3.61
   7  -3  -6   62.55    2.83
  -7  -3   6   58.93    3.46
  -7   3   6   59.51    3.18
  -7  -3   6   59.35    3.53
   7   3  -6   61.51    3.37
   7   3  -6   53.88    2.62
  -7   3   6   63.91    3.06
  -7   3   6   65.12    3.08
   7   3  -5  634.85   13.28
   7  -3  -5  665.32   12.04
  -7  -3   5  648.11   13.53
  -7  -3   5  654.22   13.57
  -7  -3   5  641.35   13.50
  -7   3   5  675.51   12.82
   7   3  -5  630.29   13.06
  -7   3   5  658.99   11.94
   7   3  -5  654.49   11.90
  -7   3   5  657.49   12.49
   7  -3  -4  257.67    6.36
   7   3  -4  255.60    7.09
  -7  -3   4  259.75    7.29
  -7  -3   4  257.01    7.52
  -7  -3   4  261.75    7.39
   7   3  -4  259.63    7.11
  -7   3   4  255.47    5.84
  -7   3   4  267.90    6.68
  -7  -3   3   -0.54    0.83
  -7  -3   3    1.43    0.78
   7   3  -3    0.80    0.75
   7  -3  -3    0.18    0.59
  -7  -3   3    0.31    0.59
   7   3  -3   -0.16    0.68
  -7   3   3    0.27    0.49
  -7  -3   2   12.18    1.55
  -7  -3   2   12.51    1.44
   7   3  -2   10.85    1.42
   7  -3  -2   13.41    1.43
  -7   3   2   14.15    1.49
  -7  -3   2    9.51    1.29
   7   3  -2   12.60    1.42
  -7  -3   1    1.72    0.70
   7   3  -1    0.76    0.55
  -7  -3   1    1.34    0.71
  -7   3   1    1.33    0.40
  -7  -3   1    1.96    1.00
   7   3  -1    1.35    1.08
  -7   3   1    2.62    0.66
  -7   3   1    1.38    0.80
   7  -3  -1    0.63    0.61
  -7   3   0    0.24    0.52
  -7   3   0    0.80    0.79
   7   3   0    0.89    0.70
  -7   3   0    0.22    0.30
  -7   3   0   -0.49    0.77
   7  -3   0    0.84    0.89
   7   3   0   -0.34    0.63
  -7  -3   0    0.29    0.62
   7   3   1    4.34    0.91
  -7   3  -1    5.07    0.91
   7   3   1    4.83    1.37
  -7   3  -1    4.46    1.13
   7  -3   1    4.96    0.69
   7   3   1    6.37    1.19
  -7   3  -1    4.39    0.57
   7  -3   1    3.45    0.75
   7  -3   1    5.02    1.23
  -7  -3  -1    3.82    0.81
  -7   3  -1    2.26    0.92
  -7   3  -2  412.71    8.87
  -7  -3  -2  395.05   10.38
   7   3   2  400.24   10.28
  -7   3  -2  426.33   10.48
   7  -3   2  400.02    7.53
  -7   3  -2  410.03    7.31
   7  -3   2  416.83    9.05
   7   3   2  415.45    9.06
   7  -3   2  401.28   10.25
  -7  -3  -2  421.89    9.28
  -7   3  -3  467.94   10.08
  -7   3  -3  467.83   11.64
   7   3   3  481.09   11.57
  -7  -3  -3  474.68   12.04
   7  -3   3  455.36   11.61
  -7   3  -3  453.59    8.68
   7  -3   3  457.01    8.77
   7  -3   3  489.39   10.35
   7   3   3  483.67   10.23
  -7  -3  -3  477.31   10.35
  -7   3  -4  140.80    5.92
   7  -3   4  138.54    6.07
  -7  -3  -4  146.94    5.12
   7   3   4  134.91    5.71
  -7  -3  -4  139.67    6.39
  -7   3  -4  139.72    4.25
   7  -3   4  143.93    4.31
   7  -3   4  146.26    5.21
  -7   3  -4  145.73    5.25
   7  -3   5   10.87    1.53
  -7   3  -5   11.64    1.75
  -7   3  -5   14.19    1.93
   7  -3   5   13.48    1.41
   7   3   5   14.95    1.75
   7  -3   5   12.24    2.01
  -7  -3  -5   12.18    1.55
  -7   3  -5   11.47    1.37
  -7  -3  -5   11.37    2.09
   7   3   5   13.18    1.97
  -7  -3  -6   51.22    4.13
   7  -3   6   56.38    4.12
  -7   3  -6   59.43    3.54
   7   3   6   55.80    3.82
   7  -3   6   59.85    3.09
  -7   3  -6   54.08    3.02
   7  -3   6   55.51    3.34
   7   3   6   56.60    3.40
   7   3   7  248.06    7.75
  -7   3  -7  228.53    8.14
   7  -3   7  220.13    8.78
  -7  -3  -7  246.48    9.52
   7  -3   7  230.83    6.92
  -7   3  -7  233.37    7.04
   7  -3   7  245.47    7.79
   7   3   7  252.09    8.53
  -7   3  -7  248.09    8.01
   7  -3   8   12.05    1.87
  -7   3  -8   12.80    1.92
  -7   3  -8   12.90    1.95
   7   3   8   10.82    1.76
   7  -3   8   15.01    2.48
  -7  -3  -8   12.17    2.25
   7  -3   8   11.02    1.54
  -7   3  -8   13.67    1.78
   7   3   8   13.43    1.80
   7   3   9   11.58    1.86
  -7   3  -9   11.58    1.94
  -7  -3  -9   11.18    0.97
   7  -3   9    6.99    1.43
   7  -3   9   10.68    1.80
  -7   3  -9    9.76    1.79
   7   3   9   11.95    2.01
  -7   3  -9    9.13    1.58
  -7  -3  -9    8.81    2.07
   7  -3   9    7.12    1.86
   7   3   9    5.50    1.41
   7   3  10    5.03    1.57
  -7  -3 -10    5.81    2.14
   7  -3  10    5.26    1.60
  -7   3 -10    7.09    1.50
  -7  -3 -10    6.75    0.64
   7  -3  10    7.23    1.50
  -7   3 -10    5.97    1.52
  -7   3 -10    7.09    1.60
   7   3  11   83.33    5.09
   7  -3  11   76.34    5.77
  -7  -3 -11   78.45    6.11
  -7   3 -11   69.17    4.57
   7  -3  11   68.36    4.31
  -7   3 -11   76.93    4.77
  -7   3 -11   80.83    5.32
  -7  -3 -12  107.77    7.40
   7  -3  12  127.02    7.78
   7   3  12  116.43    6.36
  -7   3 -12  108.92    5.80
  -7   3 -12  118.07    6.16
  -7   3 -12  109.67    6.58
   7  -3  13   57.28    5.36
  -7  -3 -13   45.46    5.03
   7   3  13   60.97    4.70
  -7   3 -13   48.33    3.94
  -7   3 -13   49.49    4.22
  -7   3 -13   64.19    5.18
   7   3  14   21.88    3.08
   7  -3  14   14.34    2.94
  -7  -3 -14   25.49    3.99
  -7   3 -14   16.46    2.41
  -7   3 -14   21.13    3.03
  -7   3 -14   18.96    3.12
  -7   3 -15    0.02    1.36
  -7  -3 -15   -0.63    1.60
   7  -3  15   -1.21    1.63
   7   3  15   -0.86    1.76
  -7   3 -15    2.86    1.60
  -7   3 -16   -0.45    1.84
  -7  -3 -16   -0.51    1.63
   7   3  16    0.00    1.24
   7  -3  16    2.25    2.00
  -7   3 -16   -0.31    1.31
  -7   3 -17    4.67    1.84
  -7  -3 -17    3.94    2.22
   7  -3  17    3.90    1.64
   7   3  17    2.33    1.36
  -7   3 -17    6.12    2.16
  -7  -3 -18   25.20    4.84
  -7   3 -18   16.34    3.56
   7   3  18   20.65    3.28
   7  -3  18   23.40    4.24
  -7   3 -18   19.92    3.32
  -7   3 -19    1.27    1.99
  -7  -3 -19    3.29    2.52
   7  -3  19   -1.39    2.11
   7   3  19    1.96    1.59
  -7   3 -20   14.17    3.71
  -7  -3 -20   11.27    3.87
   7  -3  20   15.39    3.78
   7   3  20    8.09    2.56
   7   5 -21    1.44    2.15
   7   5 -21    4.11    2.18
  -7  -5  21    1.02    1.65
   7   5 -20    1.85    1.47
  -7  -5  20    3.42    1.76
   7   5 -19    0.78    1.93
   7   5 -19   -2.75    1.72
  -7  -5  19   -0.03    1.24
   7   5 -18   26.77    4.08
   7   5 -18   27.92    3.56
  -7  -5  18   31.59    3.91
   7   5 -17  117.79    7.82
   7   5 -17  106.95    6.62
  -7  -5  17  120.23    7.37
  -7   5  16   10.87    2.12
  -7  -5  16   10.49    2.27
   7   5 -16    8.57    2.45
   7   5 -16    4.96    1.38
  -7   5  15   43.54    1.67
  -7  -5  15   44.21    4.33
  -7   5  15   42.51    1.51
  -7   5  15   39.78    3.35
   7   5 -15   45.59    3.93
   7   5 -15   40.44    4.37
  -7   5  14  195.75    4.93
  -7  -5  14  185.82    8.69
  -7   5  14  193.55    4.54
   7   5 -14  188.27    9.16
  -7   5  14  179.06    6.89
   7   5 -14  192.82    8.09
  -7  -5  13  787.14   19.70
  -7   5  13  827.35   14.32
   7   5 -13  807.58   19.61
  -7   5  13  792.18   18.56
   7   5 -13  817.54   18.23
  -7   5  13  772.17   16.37
  -7   5  12    6.09    1.38
  -7  -5  12    3.61    1.30
  -7   5  12    8.04    1.13
  -7   5  12    5.90    1.52
   7   5 -12    5.83    1.90
   7   5 -12    7.45    1.61
  -7   5  11  189.15    6.12
  -7  -5  11  200.23    8.48
  -7   5  11  195.18    6.02
  -7   5  11  194.17    8.01
   7   5 -11  191.75    7.97
  -7   5  11  202.67    7.85
   7   5 -11  181.71    6.90
  -7   5  10    1.93    0.78
  -7  -5  10    1.01    0.97
  -7   5  10    2.40    0.79
  -7   5  10    2.31    1.12
   7   5 -10    3.04    1.13
  -7   5  10    1.75    1.09
   7   5 -10   -0.77    0.84
  -7  -5   9  535.67   14.31
   7   5  -9  548.66   14.21
  -7  -5   9  569.05   14.78
  -7   5   9  576.90   12.28
  -7   5   9  535.28   14.06
  -7  -5   9  552.37   14.37
   7   5  -9  548.67   13.91
   7   5  -9  545.49   12.72
  -7   5   9  578.53   13.53
  -7   5   9  563.75   11.44
  -7   5   8    1.26    0.61
  -7  -5   8    1.04    0.79
   7   5  -8    0.89    0.97
  -7  -5   8    2.69    1.17
  -7   5   8    0.40    0.63
  -7   5   8    0.04    0.87
  -7  -5   8    0.15    0.87
   7   5  -8    0.39    0.91
  -7   5   8    1.10    0.79
   7   5  -8    0.18    0.69
  -7  -5   7   12.61    1.79
   7  -5  -7   12.63    1.11
   7   5  -7   14.39    1.88
  -7  -5   7    9.92    1.74
  -7   5   7   12.71    1.65
  -7   5   7   15.02    2.11
  -7  -5   7   12.11    1.95
   7   5  -7   12.34    1.89
   7   5  -7   12.82    1.69
  -7   5   7   14.13    1.36
  -7  -5   6    0.39    0.73
   7  -5  -6    0.42    0.48
   7   5  -6    2.34    1.02
  -7  -5   6    1.31    0.93
  -7   5   6   -0.36    0.86
  -7   5   6    1.93    1.09
  -7  -5   6    1.65    1.06
   7   5  -6    0.67    0.91
   7   5  -6    0.87    0.86
  -7   5   6    1.43    0.71
  -7  -5   5  751.54   16.62
   7   5  -5  765.01   16.32
   7   5  -5  787.69   16.50
  -7   5   5  752.16   15.89
  -7  -5   5  769.97   17.18
  -7  -5   5  780.65   15.99
   7  -5  -5  769.99   13.26
  -7   5   5  750.89   13.52
  -7  -5   4  109.63    5.16
  -7  -5   4  109.94    5.59
  -7   5   4  103.62    4.90
   7   5  -4  112.10    5.21
  -7  -5   4  107.50    4.73
   7  -5  -4   99.65    3.66
  -7   5   4  103.14    3.80
   7   5  -3   26.31    2.58
  -7   5   3   22.99    2.33
  -7  -5   3   30.38    3.01
  -7  -5   3   25.51    2.46
  -7   5   3   26.65    1.91
  -7  -5   3   26.64    2.23
   7   5  -3   23.34    2.03
   7  -5  -3   23.56    1.87
  -7  -5   2  171.30    7.34
  -7   5   2  155.56    6.31
   7   5  -2  162.21    6.44
  -7  -5   2  156.57    6.05
  -7   5   2  160.48    5.25
  -7  -5   2  167.79    5.63
   7   5  -2  162.31    5.37
   7  -5  -2  155.84    5.23
  -7   5   1  104.78    5.21
   7   5  -1  113.22    5.40
  -7   5   1  106.55    3.95
  -7  -5   1  117.20    6.07
  -7  -5   1  110.26    4.81
  -7   5   1  108.40    4.46
   7  -5  -1   91.21    4.19
  -7  -5   1  111.10    4.38
   7   5  -1  110.24    4.14
   7   5   0   40.44    2.42
  -7  -5   0   43.81    2.96
  -7   5   0   45.17    3.48
   7   5   0   44.33    3.55
  -7   5   0   45.43    2.39
  -7   5   0   46.27    2.87
  -7  -5   0   40.12    2.54
   7  -5   0   45.34    2.99
   7   5   1   13.68    1.43
  -7  -5  -1   14.14    1.67
  -7   5  -1   17.54    2.29
   7  -5   1   14.71    1.73
   7   5   1   16.69    2.44
   7   5   1   14.02    2.14
  -7   5  -1   17.20    1.45
  -7   5  -1   16.80    1.88
  -7  -5  -1   13.64    1.49
   7  -5   1   14.36    1.82
  -7  -5  -2   61.57    3.22
  -7   5  -2   64.98    4.27
   7  -5   2   66.53    3.29
   7   5   2   66.63    4.71
   7  -5   2   67.30    4.14
   7   5   2   59.38    4.39
  -7   5  -2   65.23    2.88
  -7   5  -2   64.22    3.58
   7   5   2   66.22    2.97
   7   5   3    3.39    0.83
  -7  -5  -3    2.29    0.76
  -7   5  -3    6.11    1.60
   7  -5   3    5.11    1.60
   7   5   3    3.08    1.08
   7  -5   3    4.13    1.00
  -7   5  -3    5.92    1.09
  -7   5  -3    4.98    1.21
   7  -5   3    5.05    1.65
  -7  -5  -3    3.52    0.89
  -7  -5  -4   32.80    2.24
  -7   5  -4   27.94    2.90
   7  -5   4   31.21    3.17
   7  -5   4   30.89    2.28
   7   5   4   31.61    3.34
   7  -5   4   30.17    3.00
  -7   5  -4   32.39    2.27
  -7   5  -4   30.22    2.55
   7   5   4   39.25    2.32
  -7  -5  -4   38.74    2.44
   7   5   5   55.99    2.90
  -7  -5  -5   55.60    2.71
  -7   5  -5   57.80    4.31
   7  -5   5   54.18    4.24
   7   5   5   54.05    4.30
   7  -5   5   52.79    4.09
  -7  -5  -5   58.83    3.05
  -7   5  -5   51.48    2.94
   7  -5   5   54.54    3.14
   7  -5   5   53.45    3.63
  -7   5  -5   56.49    3.67
   7   5   6  122.38    4.54
  -7   5  -6  119.58    6.28
  -7  -5  -6  121.67    3.97
   7  -5   6  122.15    6.50
  -7  -5  -6  128.30    4.81
   7   5   6  118.10    6.43
   7  -5   6  116.12    6.41
   7  -5   6  118.30    4.96
  -7   5  -6  126.21    4.94
   7  -5   6  114.67    5.52
  -7   5  -6  126.36    5.66
   7   5   7  314.51    8.16
  -7  -5  -7  313.70    6.74
  -7   5  -7  299.90   10.48
   7  -5   7  297.56   10.82
   7   5   7  286.61   10.54
   7  -5   7  301.46   10.94
  -7  -5  -7  310.43   11.70
   7  -5   7  305.96    8.65
  -7   5  -7  275.52    8.39
   7  -5   7  296.26    9.61
  -7   5  -7  302.05    9.52
  -7   5  -8   58.16    4.60
  -7  -5  -8   64.40    2.41
   7  -5   8   71.78    5.15
  -7  -5  -8   61.27    5.38
   7  -5   8   62.24    5.06
   7  -5   8   66.03    3.88
  -7   5  -8   63.87    3.93
  -7   5  -8   74.85    4.66
   7   5   8   66.60    3.62
   7   5   9   40.13    2.99
  -7  -5  -9   42.17    1.60
   7  -5   9   39.81    4.05
   7  -5   9   37.82    4.11
  -7  -5  -9   30.17    3.86
   7  -5   9   35.96    3.05
  -7   5  -9   40.48    3.34
  -7   5  -9   41.55    3.64
  -7   5 -10   50.91    4.18
   7  -5  10   58.23    4.88
   7  -5  10   54.66    5.03
  -7  -5 -10   54.76    5.44
   7  -5  10   51.76    3.90
  -7   5 -10   55.02    4.04
   7   5  10   60.00    3.89
   7  -5  11 1398.98   29.56
  -7  -5 -11 1446.94   32.49
   7  -5  11 1378.28   31.19
  -7   5 -11 1392.05   26.84
   7   5  11 1443.14   26.11
   7  -5  12   95.38    6.40
  -7   5 -12   92.71    6.30
  -7   5 -12   98.07    5.91
   7   5  12  113.69    5.77
   7  -5  12  100.30    7.35
  -7  -5 -12  105.37    7.90
  -7   5 -13   50.07    4.74
  -7   5 -13   61.39    4.79
   7   5  13   50.67    4.02
   7  -5  13   48.20    5.27
  -7  -5 -13   41.45    5.26
  -7   5 -14   41.20    4.57
  -7   5 -14   39.98    4.07
   7   5  14   39.24    3.77
  -7  -5 -14   39.54    5.44
   7  -5  14   38.57    5.03
  -7   5 -15    8.96    2.28
  -7   5 -15    6.33    2.02
   7   5  15   13.92    2.44
  -7  -5 -15   11.83    3.48
   7  -5  15   12.46    2.96
  -7   5 -16    3.33    1.79
  -7   5 -16    1.58    1.61
   7   5  16    1.79    1.56
  -7  -5 -16    0.89    2.01
   7  -5  16    2.12    1.83
  -7   5 -17   29.66    4.41
  -7   5 -17   24.84    3.73
   7   5  17   29.93    3.65
   7  -5  17   33.97    5.06
  -7  -5 -17   30.49    5.39
  -7   5 -18    2.66    2.15
  -7  -5 -18    3.51    2.93
   7  -5  18   -0.84    1.84
  -7   5 -18   -4.72    2.40
  -7  -5 -19    6.03    3.06
  -7   5 -19    1.85    2.01
  -7   5 -19    8.09    2.74
   7  -5  19    1.91    2.10
   7   7 -20   18.51    3.75
  -7  -7  20   19.66    3.73
   7   7 -20   24.01    3.87
   7   7 -19    0.13    1.69
  -7  -7  19   -2.00    2.27
   7   7 -19    1.17    1.74
   7   7 -18   19.00    3.56
   7   7 -18   23.58    3.50
   7   7 -17   16.81    3.54
  -7  -7  17   16.72    3.24
   7   7 -17   17.50    3.08
  -7  -7  16    4.83    2.16
   7   7 -16    4.37    1.78
   7   7 -16    1.43    1.75
  -7  -7  15    2.31    1.73
   7   7 -15    0.59    1.23
   7   7 -15    0.97    1.56
  -7  -7  14    1.68    1.47
   7   7 -14   -0.59    1.44
   7   7 -14   -0.31    1.27
   7   7 -13  133.97    7.74
  -7   7  13  142.67    4.52
  -7  -7  13  137.49    8.12
   7   7 -13  146.00    7.05
   7   7 -12    7.40    1.97
  -7   7  12    8.21    1.23
  -7  -7  12    5.16    2.05
   7   7 -12    7.29    1.77
  -7   7  12    6.95    1.03
  -7  -7  11  127.13    7.39
  -7   7  11  118.74    4.79
   7   7 -11  119.85    6.17
  -7   7  11   96.83    3.27
   7   7 -11  105.90    6.69
  -7  -7  10   45.64    4.46
  -7   7  10   42.41    2.90
   7   7 -10   43.75    4.05
   7   7 -10   41.72    3.55
  -7   7  10   34.40    1.76
  -7  -7   9    6.20    1.61
  -7   7   9    4.94    1.19
  -7   7   9    5.68    1.74
   7   7  -9    3.35    1.39
   7   7  -9    8.44    1.82
  -7   7   9    3.83    0.59
  -7  -7   8    0.20    0.99
  -7   7   8    1.67    0.92
   7   7  -8    1.02    1.14
  -7   7   8    0.34    0.34
   7   7  -8    1.79    1.14
  -7   7   8   -0.28    1.55
  -7  -7   7   56.04    4.62
  -7   7   7   55.20    3.63
   7   7  -7   54.50    4.17
  -7   7   7   53.43    2.06
  -7   7   7   49.63    4.35
   7   7  -7   52.64    3.81
  -7  -7   7   52.97    3.98
   7   7  -6   28.35    3.19
  -7  -7   6   30.09    2.95
   7  -7  -6   30.47    1.57
  -7  -7   6   31.45    3.23
  -7   7   6   28.49    2.74
   7   7  -5    6.10    1.50
  -7  -7   5    2.53    1.20
   7  -7  -5    5.06    0.82
  -7   7   5    6.49    1.54
   7   7  -4    1.43    1.04
  -7  -7   4    1.49    0.92
   7  -7  -4    2.24    0.71
  -7   7   4    2.34    1.10
  -7   7   4    2.34    1.20
   7   7  -4    3.29    1.25
  -7  -7   4    1.86    1.00
   7   7  -3   79.49    4.97
  -7  -7   3   88.42    6.04
  -7  -7   3   85.36    4.35
   7  -7  -3   81.04    3.59
  -7   7   3   79.64    4.88
   7   7  -3   77.44    4.62
  -7  -7   3   91.84    5.33
  -7   7   2   94.54    4.70
   7   7  -2   93.29    5.43
  -7  -7   2   93.77    6.26
  -7  -7   2   96.62    4.48
   7  -7  -2   93.29    4.15
   7   7  -2   87.09    4.74
  -7   7   2   94.73    5.38
  -7  -7   2   92.23    5.21
  -7   7   1  262.76    7.94
   7   7  -1  273.99    9.81
   7   7  -1  259.71    8.55
  -7   7   1  265.33    9.53
  -7  -7   1  267.44    9.09
  -7  -7   1  281.28    7.89
   7  -7  -1  274.88    8.05
  -7   7   0    6.20    1.63
   7   7   0    5.60    1.73
  -7  -7   0    4.28    1.16
  -7   7   0    4.93    1.11
   7  -7   0    3.64    1.11
  -7  -7   0    4.87    1.13
   7   7   1   16.50    1.55
  -7  -7  -1   20.23    2.21
  -7   7  -1   17.09    2.53
   7   7   1   15.72    2.68
   7  -7   1   19.68    2.93
  -7   7  -1   16.76    1.85
  -7   7  -1   16.51    2.15
  -7  -7  -1   20.17    1.86
   7  -7   1   18.09    2.19
   7   7   2   45.15    2.45
  -7   7  -2   48.14    4.15
  -7  -7  -2   47.00    3.34
   7   7   2   50.15    4.50
   7  -7   2   43.39    4.09
   7  -7   2   53.83    3.77
   7   7   2   40.27    4.11
   7  -7   2   48.52    3.74
  -7   7  -2   50.51    3.10
  -7   7  -2   50.34    3.59
  -7  -7  -2   48.52    2.78
   7   7   3   56.63    2.61
  -7  -7  -3   57.28    3.58
   7  -7   3   53.07    4.68
   7  -7   3   55.48    3.79
   7   7   3   69.76    5.36
   7  -7   3   58.05    4.23
  -7   7  -3   55.61    3.34
  -7   7  -3   61.28    4.08
  -7  -7  -3   62.54    3.05
   7   7   4   23.30    1.61
  -7  -7  -4   22.36    2.23
   7   7   4   23.48    3.53
   7  -7   4   23.70    2.55
   7  -7   4   19.49    2.93
   7  -7   4   28.57    3.17
  -7   7  -4   21.93    2.13
  -7   7  -4   29.29    2.90
  -7  -7  -4   26.08    1.90
  -7  -7  -5  178.15    6.17
   7  -7   5  177.86    8.81
   7  -7   5  161.23    6.79
  -7  -7  -5  181.69    5.20
   7  -7   5  181.79    8.25
  -7   7  -5  175.29    6.40
  -7   7  -5  180.93    7.50
   7   7   5  185.54    4.93
  -7  -7  -6   68.20    3.54
   7  -7   6   63.19    4.14
   7  -7   6   49.03    4.74
   7  -7   6   60.17    4.89
  -7   7  -6   55.54    3.62
  -7   7  -6   59.93    4.29
   7   7   6   67.03    2.81
  -7  -7  -7  140.93    5.01
   7  -7   7  134.05    6.31
   7  -7   7  137.81    8.00
   7  -7   7  125.09    7.33
  -7   7  -7  131.65    5.80
  -7   7  -7  130.30    6.60
   7   7   7  147.23    4.40
  -7   7  -8   -0.53    1.33
  -7  -7  -8    0.33    0.53
   7  -7   8   -2.17    1.78
   7  -7   8    1.57    1.44
   7  -7   8   -0.87    1.19
  -7   7  -8    0.16    1.04
   7   7   8    0.12    0.61
  -7   7  -9    6.96    1.86
  -7  -7  -9    4.26    0.72
   7  -7   9    6.64    2.19
   7  -7   9    2.38    1.53
  -7   7  -9    3.99    1.29
   7   7   9    3.72    0.94
   7  -7  10   40.43    4.75
   7  -7  10   43.26    4.92
  -7   7 -10   38.77    3.67
  -7   7 -10   38.68    3.94
   7   7  10   36.20    2.43
  -7   7 -11    3.03    1.55
   7  -7  11    8.92    2.63
   7  -7  11    5.76    2.01
  -7   7 -11    5.57    1.69
   7   7  11    4.99    1.17
  -7   7 -12    6.04    2.10
   7  -7  12    2.57    1.84
   7  -7  12    7.20    2.54
  -7   7 -12    4.73    1.73
   7   7  12    4.10    1.14
  -7   7 -13    9.30    2.60
   7  -7  13    8.63    2.66
   7  -7  13   10.34    2.98
  -7   7 -13   12.66    2.47
   7   7  13   12.27    1.73
   7  -7  14   -0.77    1.64
   7  -7  14   -0.47    1.68
  -7   7 -14    0.58    1.37
  -7   7 -14    0.67    1.34
  -7   7 -15   64.39    5.60
   7  -7  15   65.67    6.86
  -7   7 -15   61.51    5.82
  -7   7 -16    1.35    1.46
   7  -7  16    1.51    2.10
  -7   7 -16    0.46    1.39
  -7   7 -17    4.45    2.46
   7  -7  17    5.24    2.57
  -7   7 -17    3.09    2.34
  -7   7 -18   -0.65    1.83
  -7   7 -18    4.28    2.33
   7  -7  18    2.25    2.64
   7   9 -18  140.30    9.82
  -7  -9  18  161.43   10.77
   7   9 -18  147.55    9.02
  -7  -9  17    9.17    2.70
   7   9 -17    8.43    2.58
   7   9 -17   11.37    2.81
  -7  -9  16   25.48    4.39
   7   9 -16   21.25    3.48
   7   9 -16   23.03    3.90
  -7  -9  15   10.51    2.53
   7   9 -15    8.93    2.59
   7   9 -15    7.52    2.14
  -7  -9  14  115.10    8.42
   7   9 -14  108.47    6.86
   7   9 -14  103.55    7.31
  -7  -9  13   26.00    4.13
   7   9 -13   19.43    2.98
   7   9 -13   26.33    3.77
  -7  -9  12   11.66    2.81
   7   9 -12    8.96    1.89
   7   9 -12    7.60    2.31
  -7  -9  11   10.76    2.67
   7   9 -11    7.59    2.02
   7   9 -11    8.81    2.32
  -7   9  10   11.79    1.81
  -7  -9  10   14.21    3.10
   7   9 -10   13.69    2.41
   7   9 -10   13.83    2.80
   7   9  -9  132.00    7.46
  -7   9   9  135.91    6.26
  -7  -9   9  143.89    8.59
   7   9  -9  140.10    7.22
   7   9  -8    1.72    1.49
   7   9  -8    1.89    1.35
  -7   9   8    1.15    1.06
  -7  -9   8    0.21    1.24
   7   9  -7    2.54    1.88
  -7   9   7    4.02    1.29
  -7  -9   7    2.60    1.43
   7   9  -7    2.35    1.29
  -7   9   7    2.61    1.74
   7   9  -6   13.39    2.46
  -7  -9   6    9.72    2.32
  -7   9   6   13.77    2.16
  -7   9   6   14.30    2.62
   7   9  -5   12.42    2.48
  -7   9   5    8.81    1.88
  -7  -9   5   12.23    2.42
   7  -9  -5   11.16    0.95
  -7  -9   5   11.67    2.04
  -7   9   5   14.29    2.63
  -7   9   4  156.07    7.38
  -7  -9   4  151.70    7.97
   7   9  -4  147.92    7.64
  -7  -9   4  139.86    6.41
   7  -9  -4  151.24    4.54
  -7   9   3   -0.40    1.16
  -7  -9   3   -0.02    1.11
   7   9  -3    0.51    1.22
  -7  -9   3    0.70    0.77
   7  -9  -3    0.38    0.62
  -7   9   2  165.36    7.14
   7   9  -2  162.54    8.14
  -7  -9   2  161.04    6.41
   7  -9  -2  168.55    6.00
  -7  -9   2  166.37    8.15
   7   9  -1  407.20   13.50
  -7   9   1  398.33   11.32
  -7  -9   1  385.34   12.72
  -7  -9   1  375.98   10.13
   7  -9  -1  402.44   10.59
   7  -9   0    8.48    2.17
   7   9   0   15.02    2.69
  -7  -9   0   11.82    2.19
  -7   9   0    8.93    1.93
   7  -9   0    9.98    1.85
  -7  -9   0   11.60    1.60
  -7  -9  -1    9.41    1.95
   7   9   1    7.80    2.18
   7  -9   1   11.63    2.62
  -7   9  -1   10.78    1.84
  -7   9  -1   10.30    1.97
   7  -9   1   11.87    2.13
  -7  -9  -1    7.75    1.40
  -7  -9  -2   56.73    4.36
   7   9   2   59.96    5.27
   7  -9   2   56.94    5.39
   7  -9   2   58.71    4.40
  -7   9  -2   50.77    3.62
  -7   9  -2   58.49    4.46
  -7  -9  -2   57.78    3.15
  -7  -9  -3  280.49    9.79
   7   9   3  303.52   12.62
   7  -9   3  285.22   12.13
   7  -9   3  270.46   10.55
   7  -9   3  268.83   10.10
  -7   9  -3  283.54    9.12
  -7   9  -3  273.25   10.12
  -7  -9  -3  287.04    7.01
  -7  -9  -4    2.13    1.20
  -7   9  -4    2.03    1.23
   7  -9   4    3.51    1.59
   7  -9   4    4.95    2.07
   7   9   4    1.72    1.57
   7  -9   4    3.71    1.61
  -7  -9  -4    2.71    0.65
  -7   9  -4    3.82    1.78
  -7  -9  -5   13.61    1.93
   7   9   5   11.24    2.93
   7  -9   5   14.87    2.57
   7  -9   5   10.85    2.57
  -7   9  -5   13.62    1.98
  -7   9  -5   10.73    2.01
   7  -9   5   15.01    2.88
   7  -9   6   50.32    5.40
   7  -9   6   49.83    4.72
  -7   9  -6   49.31    3.76
  -7   9  -6   49.89    4.42
  -7  -9  -6   61.05    4.06
   7  -9   7   56.81    5.67
   7   9   7   56.74    6.02
   7  -9   7   58.77    5.31
  -7   9  -7   49.22    3.99
  -7   9  -7   48.83    4.41
  -7  -9  -7   48.72    3.52
   7  -9   8   84.33    7.05
   7  -9   8   82.71    6.54
  -7   9  -8   74.54    4.91
  -7  -9  -8   72.98    4.14
  -7   9  -8   78.01    5.69
  -7   9  -9    2.36    1.65
  -7   9  -9    1.13    1.03
   7  -9   9    4.72    2.53
  -7  -9  -9    3.03    1.10
   7  -9   9    2.75    1.76
  -7   9 -10    7.06    1.88
  -7   9 -10    7.30    2.04
   7  -9  10    9.78    2.57
   7  -9  10    6.15    2.90
  -7   9 -11   11.49    2.48
   7  -9  11   15.82    3.36
  -7   9 -11   13.83    2.56
   7  -9  11   21.39    3.83
  -7   9 -12   68.80    5.38
   7  -9  12   75.23    7.18
  -7   9 -12   64.77    5.89
   7  -9  12   76.50    7.08
  -7   9 -13   14.13    3.22
  -7   9 -13   16.36    2.89
   7  -9  13   13.37    3.50
   7  -9  13   15.03    3.59
  -7   9 -14   11.69    3.04
  -7   9 -14   11.03    2.68
   7  -9  14   14.06    3.68
   7  -9  14   17.67    3.74
  -7   9 -15   41.25    5.14
   7  -9  15   46.02    5.89
  -7   9 -15   40.63    4.73
   7  -9  15   54.43    6.51
   7  -9  16   67.68    7.63
  -7   9 -16   62.18    5.98
  -7   9 -16   60.44    6.42
   7  11 -15   -3.26    2.07
  -7 -11  15    2.52    2.21
   7  11 -15   -0.24    1.64
   7  11 -14    1.64    1.68
  -7 -11  14   -1.55    1.93
   7  11 -14    1.51    1.74
   7  11 -13   51.67    5.10
   7  11 -13   53.81    5.58
  -7 -11  13   45.08    6.05
   7  11 -12    6.59    1.96
  -7 -11  12   16.39    3.66
   7  11 -12   12.72    2.89
   7  11 -11    8.92    2.83
  -7 -11  11    8.20    2.57
   7  11 -11    9.29    2.32
   7  11 -10   22.30    3.64
  -7 -11  10   30.30    4.60
  -7  11  10   26.41    4.05
   7  11 -10   23.54    3.39
   7  11  -9   22.24    3.57
  -7  11   9   29.15    4.34
  -7 -11   9   28.14    4.22
   7  11  -9   21.78    3.20
   7  11  -8    5.62    2.05
  -7 -11   8   11.94    3.02
  -7  11   8    8.02    2.44
   7  11  -8    7.16    2.52
  -7  11   7    3.87    2.04
   7  11  -7    2.07    1.68
  -7 -11   7    6.68    2.82
   7  11  -7    5.01    1.98
  -7  11   6   21.38    3.27
   7  11  -6   15.82    2.79
   7  11  -6   20.42    3.35
  -7 -11   6   19.03    3.28
   7  11  -5   67.67    5.72
  -7 -11   5   71.96    6.33
  -7  11   5   73.95    5.79
   7  11  -4    0.90    1.60
  -7 -11   4    0.97    1.42
  -7  11   4    3.61    1.66
   7 -11  -4    0.46    0.43
  -7  11   3  142.16    7.51
   7  11  -3  143.74    8.29
  -7 -11   3  122.36    6.18
  -7 -11   3  144.64    8.67
   7 -11  -3  130.60    4.61
  -7 -11   2    1.25    1.11
  -7  11   2    5.29    1.82
   7  11  -2    3.91    1.93
   7 -11  -2    3.19    1.09
  -7 -11   2    5.50    2.02
  -7 -11   1   63.53    5.45
  -7 -11   1   59.23    3.75
   7 -11  -1   62.20    3.97
   7  11  -1   73.41    6.11
  -7  11   1   64.85    4.81
   7  11   0    6.41    2.14
  -7  11   0    7.96    2.00
   7 -11   0    7.47    1.70
  -7  11   0    9.69    2.18
  -7 -11   0    6.55    2.18
   7 -11   1   42.39    5.20
   7  11   1   43.42    5.03
  -7 -11  -1   44.01    4.37
  -7  11  -1   44.74    3.97
  -7  11  -1   48.30    4.54
   7 -11   1   46.55    3.89
  -7  11  -2    9.71    2.00
  -7 -11  -2   10.58    2.36
   7 -11   2   14.28    3.35
   7  11   2    9.20    2.70
  -7  11  -2    9.25    2.27
   7 -11   2   11.03    2.15
  -7  11  -3   19.21    2.70
   7  11   3   32.92    4.44
  -7 -11  -3   29.66    3.58
   7 -11   3   18.79    3.64
  -7  11  -3   20.15    3.10
   7 -11   3   18.10    2.91
  -7 -11  -4    3.49    1.41
   7  11   4    9.26    2.84
   7 -11   4    8.43    2.79
  -7  11  -4    5.71    1.80
  -7  11  -4    7.61    2.06
   7 -11   4    7.22    2.33
  -7  11  -5   50.02    4.20
   7 -11   5   47.02    4.77
  -7  11  -5   50.56    4.80
   7 -11   5   47.07    5.74
   7  11   5   53.93    5.91
  -7 -11  -6    5.69    1.82
   7 -11   6    6.92    2.48
   7  11   6    9.50    3.10
  -7  11  -6    7.90    1.83
  -7  11  -6    8.66    2.53
   7 -11   6   12.45    2.74
   7  11   7  153.79   10.29
   7 -11   7  138.05    9.66
   7 -11   7  144.93    8.83
  -7  11  -7  135.56    7.22
  -7  11  -7  148.43    8.56
  -7 -11  -7  133.24    6.89
  -7  11  -8    6.98    1.98
  -7 -11  -8    3.40    1.44
   7  11   8    8.11    3.16
   7 -11   8    5.52    2.56
  -7  11  -8    5.54    2.23
   7 -11   8    5.91    2.51
  -7  11  -9   23.35    3.18
  -7  11  -9   27.20    4.00
   7 -11   9   26.35    4.10
   7  11   9   28.19    4.84
   7 -11   9   18.34    3.88
  -7  11 -10    0.67    1.40
  -7  11 -10    3.30    1.69
   7 -11  10   -1.40    1.80
   7 -11  10    2.86    2.26
   7  11  10   -0.86    2.57
  -7  11 -11    4.71    2.11
  -7  11 -11    5.76    1.91
   7 -11  11   11.40    3.30
   7  11  11    7.43    2.82
  -7  11 -12    3.28    2.20
   7 -11  12    0.10    2.26
  -7  11 -12    4.36    1.80
   7 -11  12    2.89    2.16
  -7  11 -13   46.09    5.20
   7 -11  13   62.85    7.13
  -7  11 -13   57.75    6.15
   7 -11  13   61.48    7.14
   7  13 -11    2.26    2.07
   7  13 -11    5.14    2.25
  -7 -13  11    1.29    2.00
  -7  13  11    8.85    3.08
   7  13 -10   51.15    5.81
   7  13 -10   58.49    5.83
  -7 -13  10   57.83    6.94
   7  13  -9   18.41    3.52
  -7 -13   9   18.74    4.07
  -7  13   9   22.98    4.00
   7  13  -9   16.15    3.30
   7  13  -8   35.48    4.48
   7  13  -8   34.58    4.57
  -7 -13   8   35.38    5.52
  -7  13   8   44.51    5.40
   7  13  -7    1.92    1.85
   7  13  -7    4.63    2.28
  -7 -13   7    3.94    2.54
  -7  13   7    3.76    2.09
   7  13  -6   25.40    3.83
   7  13  -6   21.85    3.61
  -7 -13   6   25.69    4.46
  -7  13   6   37.03    4.57
   7  13  -5   50.98    5.35
  -7 -13   5   44.18    5.85
  -7  13   5   51.34    5.24
  -7  13   4    1.67    1.78
   7  13  -4   -3.23    1.89
  -7 -13   4    2.11    2.06
  -7  13   3   -2.87    1.74
   7  13  -3   -1.92    1.74
  -7 -13   3    0.91    1.65
   7  13  -2    2.27    1.80
  -7  13   2    3.86    1.76
  -7 -13   2    4.30    2.39
  -7  13   1   13.88    2.91
   7  13  -1   10.86    2.89
  -7  13   1   15.58    3.01
  -7 -13   1   11.01    3.04
  -7  13   0    8.39    2.59
   7  13   0   10.21    2.90
  -7  13   0    8.69    2.25
  -7 -13   0    8.82    2.72
  -7  13  -1    7.25    2.41
   7  13   1    3.86    2.29
  -7  13  -1    7.30    2.13
  -7  13  -2   -1.67    1.51
   7  13   2   -0.10    1.82
  -7  13  -2   -1.11    1.38
  -7 -13  -2    2.34    1.80
  -7  13  -3   29.86    3.69
   7  13   3   23.25    4.17
  -7 -13  -3   33.21    4.35
   7 -13   3   26.30    3.65
  -7 -13  -4   -2.81    1.85
   7 -13   4    1.23    2.16
   7  13   4    1.25    2.18
  -7  13  -4   -2.45    2.07
   7 -13   4    1.67    1.73
  -7  13  -4    5.98    1.87
   7  13   5    0.03    2.04
  -7 -13  -5   -0.15    1.42
   7 -13   5    2.49    2.78
  -7  13  -5   -1.78    1.61
   7 -13   5    0.26    1.53
  -7  13  -5    1.62    1.48
   7  13   6    5.20    2.53
   7 -13   6   -0.39    1.89
  -7  13  -6    2.61    1.76
  -7  13  -6    1.92    1.92
   7 -13   6    1.39    1.47
  -7  13  -7   62.15    5.27
   7 -13   7   66.25    6.35
  -7  13  -7   75.29    6.62
   7  13   7   75.00    7.77
   7 -13   7   67.23    7.52
   7  13   8   12.45    3.87
   7 -13   8   15.03    3.95
  -7  13  -8   16.01    3.29
   7 -13   8    9.85    2.80
  -7  13  -8    6.29    2.19
   7 -13   9    0.50    2.11
  -7  13  -9    0.29    1.51
  -7  13  -9    2.44    1.78
   7 -13   9    2.18    2.46
   8   0 -23    0.90    2.11
   8   0 -22   23.27    3.99
   8   0 -22   19.74    3.79
   8   0 -21    0.08    1.67
   8   0 -21    3.17    2.19
   8   0 -20   31.40    4.30
   8   0 -20   27.79    3.91
   8   0 -19    0.76    1.54
  -8   0  19    0.70    0.86
   8   0 -19   -2.08    1.80
   8   0 -18  125.98    7.84
  -8   0  18  111.59    5.42
   8   0 -18  114.32    7.13
   8   0 -17    2.40    1.69
  -8   0  17    0.07    0.74
   8   0 -17   -0.02    1.14
  -8   0  16   81.84    4.32
   8   0 -16   80.08    5.75
  -8   0  16   69.95    4.27
   8   0 -16   88.68    5.55
  -8   0  15   -0.69    0.81
   8   0 -15    0.87    1.28
  -8   0  15    1.10    0.89
   8   0 -15   -1.19    1.19
  -8   0  14  132.69    5.43
   8   0 -14  142.01    7.02
   8   0 -14  132.09    6.20
  -8   0  14  127.37    5.31
  -8   0  13    1.26    1.02
   8   0 -13   -0.78    0.92
  -8   0  13    0.13    0.65
   8   0 -13   -0.47    1.12
  -8   0  13   -0.11    0.70
  -8   0  12  252.40    8.81
  -8   0  12  251.74    8.52
  -8   0  12  254.05    7.51
   8   0 -12  276.95    9.32
  -8   0  12  261.73    7.18
   8   0 -12  271.65    8.14
  -8   0  11    0.65    0.73
  -8   0  11   -0.58    1.02
  -8   0  11   -0.69    0.56
   8   0 -11   -0.34    0.84
  -8   0  11   -0.12    0.67
  -8   0  10    2.10    0.88
  -8   0  10    3.20    0.93
  -8   0  10    3.09    1.16
   8   0 -10    2.79    1.04
  -8   0  10    2.36    0.69
  -8   0   9   -0.50    0.57
  -8   0   9    1.21    0.68
   8   0  -9   -0.65    0.62
   8   0  -9    0.45    0.94
  -8   0   9    0.76    0.75
   8   0  -8 1358.19   20.94
  -8   0   8 1353.48   20.35
  -8   0   8 1393.31   22.88
   8   0  -8 1372.84   23.10
  -8   0   8 1367.21   23.72
   8   0  -8 1330.48   23.40
  -8   0   7   -0.01    0.38
   8   0  -7   -0.13    0.44
  -8   0   7   -0.62    0.68
   8   0  -7   -0.84    0.96
  -8   0   7    0.05    0.73
   8   0  -7    0.23    0.68
  -8   0   6   89.60    3.42
  -8   0   6   89.85    4.02
   8   0  -6   90.68    3.91
  -8   0   6   90.57    2.23
  -8   0   5   -0.01    0.47
  -8   0   5    1.75    0.75
   8   0  -5    1.09    0.72
   8   0  -5   -1.02    0.56
  -8   0   4 7158.93   95.70
  -8   0   4 7156.48   93.04
   8   0  -4 6959.24   92.97
   8   0  -3   -0.09    0.66
  -8   0   3   -0.70    0.62
  -8   0   3   -0.05    0.37
   8   0  -3   -0.41    0.41
   8   0  -2   59.23    1.92
  -8   0   2   56.33    1.67
  -8   0   2   58.57    2.05
   8   0  -2   57.76    3.00
  -8   0   2   54.68    3.03
   8   0  -1    0.04    0.28
  -8   0   1    0.44    0.42
  -8   0   1   -0.12    0.38
   8   0  -1    0.09    0.36
  -8   0   1    1.09    0.66
   8   0  -1    0.83    0.78
   8   0   0 7657.95   98.49
  -8   0   0 7393.79   98.78
   8   0   0 7312.04   98.57
  -8   0   0 7082.57  101.45
   8   0   0 7500.33  101.72
   8   0   1    0.03    0.44
   8   0   1    1.29    0.97
  -8   0  -1    0.52    0.65
  -8   0  -1    1.42    0.58
  -8   0  -2  381.65    8.22
   8   0   2  378.31    7.98
  -8   0  -2  373.67    9.50
   8   0   2  378.03    9.48
   8   0   3    0.16    0.65
   8   0   3    0.06    0.44
  -8   0  -3    0.32    0.72
   8   0   3   -0.30    1.02
  -8   0  -3   -0.52    0.63
  -8   0  -4  169.65    5.73
   8   0   4  174.00    5.44
   8   0   4  170.46    4.97
   8   0   4  167.78    6.30
  -8   0  -4  171.41    6.40
   8   0   5    0.66    0.64
  -8   0  -5    0.80    1.01
  -8   0  -5   -0.24    0.99
   8   0   5    0.40    0.73
   8   0   5   -1.04    1.12
  -8   0  -6    9.74    1.42
   8   0   6    8.42    1.36
  -8   0  -6    9.28    1.69
   8   0   6   10.29    1.39
   8   0   6   10.97    1.99
  -8   0  -7    0.49    0.60
   8   0   7   -0.66    0.80
  -8   0  -7    1.30    1.00
   8   0   7    0.45    0.72
   8   0   7    0.40    1.01
   8   0   8  409.21   12.16
  -8   0  -8  424.99   11.88
   8   0   8  422.95   10.85
  -8   0  -8  416.49   10.19
  -8   0  -9   -0.13    0.66
   8   0   9    0.10    0.89
  -8   0  -9    1.14    1.19
   8   0   9    0.58    0.75
   8   0   9    0.62    1.01
  -8   0 -10    1.25    1.48
   8   0  10    2.24    1.39
   8   0  10    0.80    0.88
  -8   0 -10    0.82    0.81
  -8   0 -11    0.25    0.66
   8   0  11    0.51    1.47
  -8   0 -11    0.89    1.35
  -8   0 -12   57.32    3.39
   8   0  12   53.83    4.92
  -8   0 -13    0.36    0.64
   8   0  13    0.22    1.46
  -8   0 -13    1.34    1.70
  -8   0 -14   13.49    1.71
   8   0  14   16.38    3.12
  -8   0 -14   13.55    2.86
  -8   0 -15   -0.06    0.68
   8   0  15    0.27    1.37
  -8   0 -15    2.46    1.90
   8   0  16    1.61    2.10
  -8   0 -16    1.11    1.89
   8   0  17    4.35    2.16
  -8   0 -17   -2.06    1.80
   8   0  18   -0.03    2.13
  -8   0 -18    2.00    2.15
   8   0  19    1.93    2.03
  -8   0 -19    1.67    1.92
   8   0  20   17.26    3.98
  -8   0 -20   16.25    4.00
   8   2 -23   10.98    3.39
   8   2 -23    8.00    2.97
   8  -2 -23    4.06    2.76
   8   2 -22    2.50    2.03
   8   2 -22    2.86    2.20
   8  -2 -22   -1.01    2.24
   8   2 -21   87.34    7.60
   8   2 -21   93.62    6.97
   8  -2 -21   96.04    7.94
   8   2 -20  105.16    7.81
  -8  -2  20  101.69    6.04
   8  -2 -20  102.61    7.75
   8   2 -19    1.70    1.54
  -8  -2  19   -0.53    0.99
   8   2 -19   -0.55    1.37
   8  -2 -19    0.41    1.58
   8   2 -18   27.24    3.78
  -8   2  18   23.58    1.95
  -8  -2  18   24.26    3.01
   8  -2 -18   25.31    3.56
   8   2 -18   26.23    3.44
  -8  -2  17  178.79    7.67
  -8   2  17  175.75    5.66
   8   2 -17  187.75    9.35
   8   2 -17  182.58    8.17
   8  -2 -17  176.12    9.20
  -8   2  16    4.42    0.97
  -8  -2  16    2.67    1.05
   8   2 -16    2.78    1.90
  -8   2  16    4.34    1.37
   8  -2 -16    2.82    1.75
   8   2 -16    3.93    1.31
  -8   2  15   41.10    2.62
  -8  -2  15   36.31    3.31
   8   2 -15   38.90    4.09
  -8  -2  15   33.72    2.88
   8   2 -15   36.97    3.33
  -8   2  15   39.67    3.20
   8  -2 -15   40.54    4.03
  -8   2  14   39.61    2.49
  -8  -2  14   35.35    3.16
   8  -2 -14   33.99    3.54
  -8  -2  14   35.59    2.82
   8   2 -14   35.32    3.50
   8  -2 -14   43.94    3.93
   8   2 -14   31.91    2.94
  -8   2  14   32.18    2.78
  -8  -2  13    4.93    1.24
  -8   2  13    7.79    1.13
   8  -2 -13    9.70    2.12
  -8   2  13    5.31    1.50
   8   2 -13    7.43    1.85
   8  -2 -13    3.68    1.32
  -8  -2  13    4.78    1.09
   8   2 -13    4.58    1.27
  -8   2  13    6.83    1.32
  -8  -2  12   65.77    4.04
   8  -2 -12   70.12    4.45
  -8   2  12   62.63    4.03
   8   2 -12   70.07    4.71
  -8   2  12   61.05    4.14
  -8  -2  12   64.28    3.49
   8  -2 -12   70.89    4.55
   8   2 -12   65.17    3.70
  -8   2  12   68.17    3.56
  -8  -2  11   69.76    4.07
   8  -2 -11   70.13    4.27
  -8   2  11   65.24    3.96
  -8  -2  11   68.70    4.39
   8   2 -11   63.20    4.38
  -8   2  11   67.60    4.08
  -8  -2  11   66.67    4.19
  -8  -2  11   64.79    3.29
   8  -2 -11   69.49    4.25
  -8   2  11   72.56    3.50
   8   2 -11   66.03    3.50
  -8  -2  10  184.27    6.63
   8  -2 -10  193.71    6.77
  -8  -2  10  185.72    7.19
  -8   2  10  184.58    6.43
  -8   2  10  181.80    6.49
  -8  -2  10  172.47    6.59
   8   2 -10  169.89    6.85
  -8  -2  10  183.80    5.57
   8  -2 -10  184.36    6.76
   8   2 -10  174.74    5.59
  -8   2  10  189.98    5.71
  -8  -2   9  107.18    4.86
   8  -2  -9  101.41    4.50
   8  -2  -9  110.88    4.49
  -8   2   9  113.54    4.73
  -8  -2   9  111.05    5.31
   8   2  -9  103.28    5.15
  -8  -2   9  111.74    4.91
  -8   2   9  113.68    4.73
  -8  -2   9  109.52    3.93
   8  -2  -9  110.35    4.86
  -8   2   9  110.12    3.99
   8   2  -9  108.13    3.99
  -8  -2   8    4.65    1.06
  -8   2   8    8.33    1.03
   8  -2  -8    6.95    1.19
  -8  -2   8    7.33    1.41
   8   2  -8    5.84    1.24
  -8  -2   8    7.60    1.46
   8  -2  -8   10.07    1.36
  -8   2   8    8.65    1.38
  -8  -2   8    7.58    1.03
  -8   2   8    8.40    1.25
   8  -2  -8    6.30    1.31
   8   2  -8    7.15    1.00
  -8  -2   7   85.96    4.07
  -8   2   7   82.51    3.80
   8   2  -7   75.80    3.98
   8  -2  -7   85.04    3.68
  -8  -2   7   82.21    3.89
   8   2  -7   85.54    3.98
  -8   2   7   85.20    3.57
   8  -2  -7   81.25    3.63
   8   2  -7   85.43    2.99
  -8   2   7   79.63    3.02
  -8   2   6  226.73    5.45
  -8  -2   6  230.13    6.86
  -8  -2   6  237.76    6.78
   8   2  -6  236.18    6.62
  -8   2   6  234.27    5.92
   8   2  -6  235.65    5.20
   8  -2  -6  225.92    5.95
  -8   2   6  226.32    6.56
   8   2  -6  234.43    7.06
   8  -2  -6  228.12    6.23
  -8   2   5 2523.80   37.47
  -8   2   5 2490.12   35.39
  -8  -2   5 2454.10   37.21
   8   2  -5 2466.79   36.97
  -8   2   5 2532.70   35.52
   8   2  -5 2440.41   34.82
   8   2  -5 2472.76   37.89
  -8  -2   5 2518.88   38.23
   8  -2  -5 2482.79   36.93
  -8   2   4  869.22   15.97
   8   2  -4  872.74   15.40
  -8  -2   4  863.66   15.67
  -8   2   4  890.04   13.75
   8   2  -4  866.68   16.20
   8  -2  -4  855.98   15.56
  -8  -2   4  886.88   16.48
   8  -2  -3   18.90    1.72
  -8   2   3   18.80    1.77
   8   2  -3   21.49    1.69
  -8   2   3   22.19    1.08
  -8  -2   3   20.14    1.72
  -8  -2   3   20.32    1.91
   8   2  -3   19.62    1.85
   8   2  -2  121.18    4.18
  -8  -2   2  124.49    4.53
  -8   2   2  113.90    4.45
  -8  -2   2  122.69    4.58
   8  -2  -2  122.04    4.51
  -8   2   2  126.97    3.16
   8   2  -2  109.52    4.28
   8   2  -1  167.42    5.27
  -8  -2   1  174.26    5.79
   8  -2  -1  187.24    5.91
  -8  -2   1  169.77    5.62
  -8   2   1  188.76    5.92
   8   2  -1  180.72    5.31
  -8   2   1  189.37    4.26
   8   2  -1  180.48    5.54
   8   2   0    2.55    0.73
  -8   2   0    3.09    0.63
   8   2   0    3.74    1.01
  -8  -2   0    2.33    0.78
   8   2   0    3.62    0.82
   8  -2   0    3.24    0.65
   8  -2   0    2.36    0.90
  -8  -2   0    2.92    0.91
  -8   2   0    3.50    1.10
  -8   2  -1  804.98   13.58
   8  -2   1  803.52   11.46
   8   2   1  820.89   14.84
  -8   2  -1  768.61   15.65
  -8  -2  -1  801.60   15.35
  -8   2  -1  791.87   11.46
   8  -2   1  790.82   13.58
   8  -2   1  764.13   15.67
   8   2   1  769.22   14.83
  -8  -2  -1  770.66   14.98
  -8   2  -2   19.23    1.61
   8   2   2   18.23    1.81
  -8  -2  -2   17.14    1.90
  -8   2  -2   19.53    2.08
   8  -2   2   17.56    1.04
  -8   2  -2   18.08    1.06
   8  -2   2   18.65    1.59
   8  -2   2   17.55    2.02
  -8  -2  -2   17.30    1.78
   8   2   2   17.86    1.67
  -8   2  -3 1769.17   27.27
   8   2   3 1737.88   28.14
  -8   2  -3 1751.33   29.11
  -8   2  -3 1746.17   29.65
  -8  -2  -3 1743.29   29.33
   8  -2   3 1692.64   25.04
  -8   2  -3 1719.66   25.26
   8  -2   3 1774.41   27.08
  -8  -2  -3 1743.84   28.33
   8  -2   3 1678.00   29.49
   8   2   3 1760.86   28.33
   8   2   4 1124.44   19.99
  -8   2  -4 1092.99   19.17
   8  -2   4 1075.29   18.79
  -8   2  -4 1075.28   20.50
  -8  -2  -4 1101.83   21.03
   8  -2   4 1073.78   21.12
  -8  -2  -4 1093.08   20.00
   8  -2   4 1071.90   17.25
  -8   2  -4 1068.04   17.48
   8   2   4 1091.38   19.96
   8  -2   5   78.43    3.76
   8   2   5   71.54    3.97
  -8   2  -5   82.95    4.02
  -8   2  -5   81.54    4.38
   8  -2   5   80.45    4.75
  -8  -2  -5   77.50    4.02
  -8  -2  -5   79.50    4.59
   8  -2   5   77.84    3.18
  -8   2  -5   74.43    3.28
   8   2   5   76.47    4.05
  -8   2  -6    1.35    0.98
   8  -2   6    1.45    0.81
  -8   2  -6    0.74    0.90
   8  -2   6    0.70    1.10
   8   2   6    0.16    0.99
  -8   2  -6    1.10    0.61
   8  -2   6    1.40    0.72
  -8  -2  -6    0.73    0.81
   8   2   6    1.30    0.90
  -8  -2  -6    1.92    1.35
   8   2   7   45.21    3.40
  -8  -2  -7   42.65    3.75
   8  -2   7   46.88    3.86
  -8   2  -7   45.05    3.36
   8  -2   7   43.96    2.80
  -8   2  -7   45.05    2.90
   8   2   7   43.82    3.21
   8   2   7   48.16    3.48
   8  -2   7   41.82    3.03
  -8   2  -7   43.00    3.24
  -8   2  -8   75.51    4.47
   8  -2   8   70.11    4.05
   8   2   8   71.46    4.37
  -8  -2  -8   68.60    4.80
   8  -2   8   75.53    5.08
   8  -2   8   68.59    3.68
  -8   2  -8   67.10    3.80
   8   2   8   73.36    4.33
   8   2   8   73.76    4.51
  -8   2  -9   12.54    1.94
  -8  -2  -9   13.62    1.35
  -8   2  -9   10.44    1.93
   8  -2   9   13.19    1.91
   8   2   9   10.71    1.87
   8  -2   9   12.11    1.79
   8   2   9   12.33    2.06
  -8   2  -9   12.92    1.71
   8   2   9   10.92    2.01
   8  -2   9   14.20    2.27
  -8  -2  -9   11.31    2.16
   8  -2  10   10.62    2.32
   8   2  10   13.39    2.13
  -8  -2 -10    9.40    2.32
  -8  -2 -10   11.83    1.25
  -8   2 -10    8.61    1.65
   8  -2  10    9.04    1.62
   8   2  10   12.34    2.11
  -8   2 -10   11.76    1.83
  -8   2 -10    8.06    1.81
  -8  -2 -11   36.12    4.14
   8  -2  11   40.70    4.24
   8   2  11   39.05    3.82
  -8   2 -11   39.67    3.35
  -8  -2 -11   40.74    2.13
   8  -2  11   36.15    3.24
  -8   2 -11   37.66    3.32
  -8   2 -11   43.64    4.06
   8   2  12   27.54    3.26
   8  -2  12   27.23    3.51
  -8  -2 -12   32.65    4.06
  -8   2 -12   26.84    2.77
  -8  -2 -12   31.39    1.78
  -8   2 -12   31.68    3.34
  -8   2 -12   30.59    3.71
  -8  -2 -13   89.10    6.87
   8   2  13   88.31    6.05
   8  -2  13   92.99    6.81
  -8   2 -13   81.60    4.88
  -8  -2 -13   90.82    2.98
  -8   2 -13   84.03    5.43
  -8   2 -13   91.26    6.29
  -8   2 -14    8.18    2.21
  -8  -2 -14    5.97    2.09
  -8  -2 -14    6.82    0.80
  -8   2 -14    8.11    1.59
  -8   2 -14    7.39    2.04
   8  -2  14   10.16    2.69
   8   2  14    8.73    2.40
   8  -2  15    2.27    1.79
   8   2  15    3.00    2.06
  -8   2 -15    3.46    1.63
  -8  -2 -15   -3.23    1.97
  -8   2 -15    0.65    1.05
  -8   2 -16   14.77    3.08
  -8  -2 -16   11.61    3.06
   8  -2  16   19.73    3.71
   8   2  16   14.52    2.90
  -8   2 -17    6.41    2.14
  -8  -2 -17    1.08    1.84
   8  -2  17    2.76    2.32
   8   2  17    0.40    1.36
   8   2  18   46.70    5.18
   8  -2  18   46.76    5.95
  -8   2 -18   48.95    5.72
  -8  -2 -19    0.85    2.41
   8  -2  19   -3.04    2.40
   8   2  19    3.90    2.04
  -8  -2 -20   24.54    5.31
  -8   2 -20   39.99    5.77
   8   2  20   31.26    4.57
   8  -2  20   31.95    5.19
   8   4 -22    1.57    2.02
   8   4 -22   -0.65    1.73
  -8  -4  21   67.45    5.66
   8   4 -21   57.64    6.32
   8   4 -21   69.77    6.05
   8   4 -20   11.77    2.61
   8  -4 -20   15.70    3.84
   8   4 -20    8.42    2.80
  -8  -4  20   11.21    2.44
  -8  -4  19   13.57    2.67
   8   4 -19   14.62    3.08
   8   4 -19   14.44    2.74
   8  -4 -19   15.55    3.52
  -8  -4  18    7.84    2.10
   8   4 -18   10.45    2.61
   8   4 -18    6.64    1.88
   8  -4 -18    7.50    2.38
  -8  -4  17    2.79    1.63
   8  -4 -17    2.42    1.84
   8   4 -17    2.07    1.75
   8   4 -17    1.43    1.37
  -8   4  16   16.93    1.27
  -8  -4  16   17.50    2.69
   8  -4 -16   17.72    3.05
  -8   4  16   13.30    2.25
   8   4 -16   21.16    3.47
   8   4 -16   17.05    2.52
   8  -4 -15   55.21    4.95
   8   4 -15   50.93    4.92
  -8   4  15   43.93    3.73
  -8  -4  15   54.00    4.55
  -8   4  15   51.53    2.41
   8   4 -15   46.92    3.84
  -8   4  14  353.90    7.63
  -8  -4  14  351.45   11.61
   8   4 -14  344.30   11.96
  -8   4  14  318.92   10.05
  -8  -4  14  320.19    9.98
   8   4 -14  342.38   10.50
  -8   4  14  345.10   10.53
   8   4 -13  369.70   12.00
  -8   4  13  353.38   10.07
  -8  -4  13  363.27   11.69
   8   4 -13  354.15   10.37
  -8   4  13  351.77   10.43
  -8  -4  12   26.88    3.01
  -8   4  12   27.61    2.51
   8   4 -12   30.58    3.27
  -8   4  12   27.98    2.87
   8   4 -12   30.44    2.74
  -8   4  12   27.97    2.63
  -8  -4  11   -0.12    1.13
  -8   4  11    0.42    0.77
  -8   4  11   -0.56    0.76
   8   4 -11    2.86    1.38
  -8   4  11    0.08    0.95
   8   4 -11    0.15    0.79
  -8  -4  10    8.54    1.71
  -8   4  10   10.65    1.74
  -8   4  10   11.29    1.53
  -8  -4  10    9.38    1.84
  -8  -4  10   11.03    1.94
   8   4 -10    7.85    1.79
  -8   4  10   12.85    1.97
   8   4 -10    9.36    1.52
  -8  -4   9    0.10    0.88
  -8   4   9   -0.48    0.92
  -8   4   9    0.33    0.84
  -8  -4   9    0.27    0.78
   8   4  -9    0.73    1.00
  -8  -4   9    0.87    0.83
  -8   4   9    0.58    0.65
   8   4  -9    0.03    0.65
  -8  -4   8 1350.22   24.97
   8  -4  -8 1315.88   21.39
  -8  -4   8 1298.60   24.76
  -8   4   8 1345.19   23.94
  -8  -4   8 1256.38   24.76
   8   4  -8 1307.66   24.29
  -8   4   8 1366.57   23.11
   8   4  -8 1299.51   22.16
  -8   4   8 1326.78   22.32
  -8  -4   7   70.39    4.21
   8  -4  -7   72.86    3.13
  -8  -4   7   68.58    4.13
  -8  -4   7   72.31    4.22
  -8   4   7   72.02    3.95
   8   4  -7   62.99    3.82
  -8   4   7   70.95    3.47
   8   4  -7   68.26    3.35
  -8   4   7   72.19    3.43
   8  -4  -6   38.09    2.23
  -8  -4   6   35.65    2.93
  -8  -4   6   39.52    3.05
   8   4  -6   37.89    2.95
  -8   4   6   34.22    2.35
   8   4  -6   35.18    2.40
  -8   4   6   35.68    2.30
  -8   4   6   33.75    2.65
   8  -4  -5    0.98    0.71
  -8  -4   5    1.02    0.88
   8   4  -5    1.86    0.84
  -8  -4   5    0.23    0.92
  -8  -4   5    1.79    0.99
   8   4  -5    0.57    0.90
  -8   4   5    1.73    0.73
  -8   4   5    2.36    0.78
  -8  -4   4   28.85    2.68
  -8  -4   4   28.73    2.51
   8   4  -4   30.01    2.54
   8   4  -4   25.84    2.25
  -8  -4   4   27.44    2.38
   8  -4  -4   29.02    2.07
  -8   4   4   29.00    2.13
  -8  -4   3  144.63    6.05
   8   4  -3  142.41    5.56
  -8   4   3  142.64    5.80
   8   4  -3  137.23    5.09
  -8  -4   3  144.28    5.38
  -8   4   3  143.57    4.99
   8  -4  -3  141.09    4.90
  -8  -4   3  141.61    5.49
   8   4  -2  119.90    5.22
  -8   4   2  128.39    5.58
  -8  -4   2  126.74    5.83
  -8   4   2  121.15    3.88
  -8  -4   2  129.72    5.11
   8  -4  -2  120.80    4.73
  -8   4   2  114.35    4.56
   8   4  -2  128.86    4.71
  -8  -4   2  127.83    4.92
   8   4  -1    7.71    1.21
  -8  -4   1    5.63    1.10
  -8  -4   1    6.56    1.32
  -8  -4   1    5.18    1.30
   8   4  -1    6.55    1.53
  -8   4   1    6.47    1.64
  -8   4   1    7.08    0.87
  -8   4   1    6.54    1.07
   8  -4  -1    6.06    1.24
  -8   4   1    5.47    1.22
   8   4   0  716.58   14.25
  -8  -4   0  770.31   14.82
   8   4   0  776.99   16.53
  -8   4   0  745.28   16.48
   8   4   0  785.50   16.43
  -8   4   0  776.75   15.59
  -8   4   0  784.71   12.35
  -8   4   0  784.20   14.34
   8  -4   0  764.31   15.60
  -8  -4   0  772.53   14.90
   8   4   1    0.37    0.62
  -8  -4  -1    0.89    0.72
   8  -4   1   -0.01    0.51
   8   4   1   -0.28    1.10
  -8   4  -1    1.49    1.15
  -8   4  -1    0.02    0.80
   8   4   1   -1.18    0.91
  -8   4  -1    1.09    0.54
   8  -4   1   -0.19    0.87
  -8  -4  -1   -0.26    0.74
  -8   4  -1    1.67    1.00
   8   4   2   10.94    1.40
  -8  -4  -2   11.67    1.47
  -8   4  -2    9.09    1.77
   8   4   2    7.49    1.53
   8  -4   2   11.08    1.14
  -8   4  -2   10.73    1.05
  -8   4  -2   10.77    1.36
   8  -4   2   10.38    1.83
  -8  -4  -2   10.06    1.38
   8   4   3   60.18    3.24
  -8  -4  -3   67.65    3.46
  -8  -4  -3   67.53    3.11
  -8   4  -3   65.83    4.28
   8  -4   3   67.87    2.86
  -8   4  -3   65.27    2.67
  -8   4  -3   71.95    3.63
   8  -4   3   72.02    3.72
   8   4   3   67.35    4.30
   8  -4   3   66.31    4.22
   8   4   4 1616.56   26.74
  -8  -4  -4 1717.38   27.38
  -8  -4  -4 1664.95   25.77
  -8   4  -4 1650.32   30.01
   8  -4   4 1650.68   30.06
   8   4   4 1646.41   29.84
  -8  -4  -4 1672.28   30.75
   8  -4   4 1650.53   25.69
  -8   4  -4 1594.11   25.33
   8  -4   4 1738.78   28.11
  -8   4  -4 1686.15   27.61
   8  -4   5   14.11    2.44
   8   4   5   12.58    1.66
  -8  -4  -5   11.55    1.63
  -8  -4  -5   11.05    1.20
  -8   4  -5   13.09    2.06
   8  -4   5   12.30    1.44
  -8   4  -5   16.63    2.02
  -8   4  -5   10.37    1.34
   8  -4   5   12.98    1.78
   8   4   5   12.38    2.05
  -8  -4  -5   11.38    2.28
   8   4   6  196.25    6.56
  -8  -4  -6  195.97    5.10
  -8   4  -6  196.45    7.90
  -8  -4  -6  190.28    8.51
   8   4   6  189.09    7.69
  -8  -4  -6  195.74    6.67
   8  -4   6  189.76    8.12
   8  -4   6  176.40    5.80
  -8   4  -6  186.16    5.97
   8  -4   6  188.90    6.98
  -8   4  -6  187.64    7.05
   8  -4   7    6.96    1.93
   8   4   7    8.73    1.61
  -8  -4  -7    9.08    0.97
  -8   4  -7    6.85    1.77
   8   4   7    6.64    1.67
  -8  -4  -7    7.72    1.93
   8  -4   7    6.42    1.25
  -8   4  -7    7.02    1.37
  -8   4  -7    5.75    1.38
   8  -4   7    7.93    1.53
   8   4   8   21.09    2.30
   8  -4   8   18.80    2.76
  -8  -4  -8   24.96    1.46
  -8   4  -8   16.55    2.41
   8  -4   8   18.57    2.08
  -8   4  -8   18.85    2.45
  -8   4  -8   19.13    2.14
  -8  -4  -8   22.97    3.24
   8   4   9   32.66    2.98
   8  -4   9   34.89    3.78
  -8  -4  -9   36.68    1.62
  -8   4  -9   29.58    3.09
  -8  -4  -9   30.25    3.73
   8  -4   9   29.94    2.61
  -8   4  -9   31.98    2.86
  -8   4  -9   36.84    3.45
   8  -4  10    0.70    1.31
   8   4  10   -0.59    0.99
  -8   4 -10   -0.20    1.35
  -8  -4 -10   -0.02    0.25
  -8  -4 -10    1.30    0.45
   8  -4  10    0.10    0.80
  -8   4 -10   -0.73    0.85
  -8   4 -10    2.46    1.35
  -8  -4 -10    0.90    1.26
  -8   4 -11    2.23    1.29
  -8   4 -11    1.29    1.24
   8  -4  11    0.34    1.37
   8   4  11    0.50    0.97
  -8  -4 -11   -0.61    1.61
  -8   4 -12   22.47    3.20
  -8   4 -12   22.54    2.76
   8  -4  12   23.74    3.52
   8   4  12   25.14    2.92
  -8  -4 -12   26.31    3.94
  -8   4 -13   47.61    4.56
  -8   4 -13   45.67    4.11
   8   4  13   45.82    4.05
   8  -4  13   45.62    5.19
  -8  -4 -13   49.03    5.61
  -8   4 -14    0.52    1.51
  -8   4 -14    3.46    1.58
   8  -4  14    3.12    2.09
   8   4  14    1.34    1.15
  -8  -4 -14    1.81    2.12
  -8   4 -15   -0.42    1.44
  -8   4 -15    0.62    1.38
   8  -4  15   -1.31    2.16
   8   4  15    1.49    1.58
  -8  -4 -15   -0.42    1.99
  -8   4 -16    8.27    2.59
  -8  -4 -16    7.61    2.70
   8   4  16    6.45    1.93
   8  -4  16    9.45    2.67
  -8   4 -16    4.46    1.89
  -8   4 -17    6.11    2.84
  -8  -4 -17    4.88    2.54
   8   4  17    5.05    2.05
   8  -4  17    5.34    2.55
  -8   4 -17    2.15    1.53
  -8   4 -18   35.18    5.14
  -8  -4 -18   34.98    5.73
   8   4  18   33.68    4.31
   8  -4  18   34.73    5.33
  -8   4 -18   40.81    5.01
  -8   4 -19   25.93    4.78
  -8  -4 -19   29.09    5.91
   8   4  19   19.82    3.53
   8  -4  19   28.88    4.87
  -8   4 -19   28.73    4.31
  -8   4 -20    3.12    2.71
  -8  -4 -20    5.94    3.35
   8  -4  20    6.79    3.25
  -8  -6  21    9.75    2.76
   8   6 -21   12.52    2.85
   8   6 -20    0.39    1.74
  -8  -6  20    3.82    1.76
   8   6 -20    2.30    1.75
   8   6 -19    3.01    1.83
  -8  -6  19    2.71    1.41
   8   6 -19    0.43    1.58
  -8  -6  18    4.19    1.96
   8   6 -18    5.25    1.80
   8   6 -18    6.10    2.10
   8   6 -17  164.14    9.42
   8   6 -17  151.68    7.93
  -8  -6  17  165.61    9.24
   8   6 -16   10.25    2.62
   8   6 -16   15.97    2.57
  -8  -6  16   16.16    2.91
   8   6 -15   23.19    3.38
   8   6 -15   20.79    2.89
  -8  -6  15   24.66    3.52
  -8   6  14   25.94    2.45
  -8  -6  14   22.74    3.37
  -8   6  14   24.51    1.79
   8   6 -14   26.31    3.65
   8   6 -14   19.47    2.66
  -8  -6  13    1.34    1.29
  -8   6  13    0.59    0.60
   8   6 -13    2.11    1.53
   8   6 -13    1.32    1.30
  -8   6  13    0.83    0.84
  -8  -6  12  286.56   11.14
  -8   6  12  300.52    8.01
  -8   6  12  262.57   10.14
   8   6 -12  265.03   10.47
  -8   6  12  279.72    7.94
   8   6 -12  272.45    9.37
  -8  -6  11   47.32    4.43
  -8   6  11   41.21    2.91
  -8   6  11   42.97    4.02
   8   6 -11   42.54    3.94
   8   6 -11   43.39    3.45
  -8   6  11   38.34    2.62
  -8  -6  10  106.11    6.34
  -8   6  10   99.62    4.64
  -8   6  10   94.02    5.74
   8   6 -10  103.94    5.88
   8   6 -10   95.61    5.00
  -8   6  10   92.43    5.27
  -8   6  10   92.20    3.87
  -8  -6   9    2.91    1.40
  -8   6   9    4.02    1.19
  -8   6   9    2.59    1.42
   8   6  -9    3.00    1.29
  -8   6   9    6.27    1.33
   8   6  -9    7.40    1.66
  -8  -6   8  267.88    9.57
   8  -6  -8  287.66    6.39
  -8  -6   8  290.56   10.36
  -8   6   8  275.26    8.59
  -8   6   8  266.27    9.91
   8   6  -8  273.35    9.49
   8   6  -8  276.51    8.67
  -8   6   8  281.57    8.88
  -8   6   8  258.50    6.71
  -8  -6   7   72.07    4.56
   8  -6  -7   76.68    2.92
  -8  -6   7   61.99    4.59
  -8   6   7   71.00    4.19
  -8  -6   7   65.64    4.77
  -8   6   7   71.55    4.88
   8   6  -7   57.75    4.13
   8   6  -7   67.25    3.96
  -8   6   7   72.52    3.09
  -8  -6   6  223.43    8.56
  -8   6   6  224.87    7.87
  -8  -6   6  222.00    8.87
   8  -6  -6  222.23    5.67
  -8   6   6  226.51    5.99
  -8   6   5   56.22    3.87
  -8  -6   5   62.34    4.60
  -8   6   5   58.13    2.88
   8   6  -5   62.97    4.18
   8  -6  -5   58.72    2.81
  -8  -6   5   65.69    4.06
  -8  -6   5   64.01    4.37
  -8  -6   4  789.41   17.84
  -8   6   4  801.92   17.69
  -8  -6   4  826.36   19.46
  -8   6   4  793.93   14.87
   8   6  -4  795.58   17.73
  -8  -6   4  805.98   16.75
   8  -6  -4  814.79   14.86
  -8  -6   3   14.69    2.15
  -8   6   3   16.48    2.22
  -8   6   3   17.61    1.98
  -8  -6   3   18.27    2.63
  -8   6   3   18.02    1.81
   8   6  -3   13.99    2.08
  -8  -6   3   15.15    1.86
   8  -6  -3   17.61    1.77
  -8  -6   2   46.07    3.44
   8   6  -2   45.47    2.87
  -8  -6   2   44.39    3.04
   8  -6  -2   47.47    3.00
  -8   6   2   45.97    2.91
   8   6  -2   43.01    3.55
  -8  -6   2   47.55    4.34
  -8   6   2   46.72    3.71
  -8  -6   1   89.28    4.72
  -8   6   1   95.50    5.41
   8  -6  -1   97.33    4.58
   8   6  -1   92.73    4.01
  -8  -6   1   94.01    4.33
  -8   6   1   95.20    3.96
   8   6  -1   89.39    5.25
   8   6   0  222.44    6.34
  -8   6   0  191.14    8.01
  -8  -6   0  212.05    7.34
  -8   6   0  211.69    6.08
   8   6   0  209.47    8.43
  -8   6   0  204.32    6.94
   8  -6   0  207.30    7.20
  -8  -6   0  223.81    6.78
   8   6   1   25.71    1.99
  -8  -6  -1   26.80    2.36
  -8   6  -1   24.90    2.92
   8   6   1   25.51    3.12
   8  -6   1   23.93    2.18
   8   6   1   26.09    3.15
  -8   6  -1   27.16    1.97
  -8   6  -1   28.70    2.56
   8  -6   1   28.35    2.72
  -8  -6  -1   26.46    2.18
   8   6   2   -0.62    0.66
  -8  -6  -2    0.25    0.66
  -8   6  -2   -0.82    1.05
   8   6   2   -0.65    1.25
   8   6   2   -1.22    1.30
  -8   6  -2   -0.19    0.61
  -8   6  -2   -0.08    0.76
   8  -6   2   -0.98    1.08
   8   6   3  147.10    4.88
  -8  -6  -3  138.94    5.34
  -8   6  -3  141.89    7.02
   8  -6   3  136.12    5.39
   8   6   3  142.08    7.54
   8  -6   3  133.35    6.44
   8   6   3  139.51    7.47
  -8   6  -3  133.86    4.79
  -8   6  -3  144.07    5.97
  -8  -6  -3  147.71    5.20
   8   6   4  217.01    6.09
  -8  -6  -4  203.62    6.52
  -8   6  -4  206.69    8.80
   8  -6   4  208.72    6.86
   8   6   4  204.83    9.20
   8  -6   4  219.22    8.71
  -8   6  -4  220.75    6.48
  -8   6  -4  213.88    7.63
  -8  -6  -4  216.79    6.44
  -8  -6  -5  338.01    8.57
   8  -6   5  349.53   12.31
   8  -6   5  351.46    9.44
  -8  -6  -5  353.34    8.75
   8  -6   5  348.04   11.66
  -8   6  -5  350.12    8.97
  -8   6  -5  357.36   10.53
   8   6   5  374.46    8.54
  -8  -6  -6   27.59    2.04
   8  -6   6   31.87    2.72
   8  -6   6   26.54    3.48
  -8  -6  -6   30.60    2.26
   8  -6   6   28.46    3.40
  -8   6  -6   25.36    2.38
   8   6   6   26.96    2.08
  -8   6  -6   30.95    3.03
  -8  -6  -7   48.30    2.62
   8  -6   7   48.70    4.52
   8  -6   7   55.60    4.89
   8  -6   7   52.73    3.61
  -8   6  -7   55.57    3.50
   8   6   7   55.07    3.09
  -8   6  -7   56.46    4.11
  -8  -6  -8  195.17    5.31
[truncated: 581,343 more chars]
