# Supplementary material for: Pentaborate(1-) Salts and a Tetraborate(2-) Salt Derived from C2- or C3-Linked Bis(alkylammonium) Dications: Synthesis, Characterization, and Structural (XRD) Studies
Source: Molecules. 2019 Dec 23;25(1):53. doi: 10.3390/molecules25010053 (PMC6982793; doi:10.3390/molecules25010053)
Supplement: Supplementary file 1 [file molecules-25-00053-s001.zip › MAB9.cif]

data_MAB9

#2017ncs0329

_audit_creation_date               2019-11-26
_audit_creation_method
;
Olex2 1.3
(compiled 2019.09.11 svn.r3662 for OlexSys, GUI svn.r5938)
;
_shelx_SHELXL_version_number       '2018/3'
loop_
  _audit_author_name
  _audit_author_email
  _audit_author_address
 'Beckett, M.A.' ''
;
Bangor University
School of Chemistry
Bangor
LL57 2UW
UK
;
 'Horton, P.N.' pnh@soton.ac.uk
;
University of Southampton
Chemistry
Southampton
SO17 1BJ
UK
;

_audit_contact_author_address      ?
_audit_contact_author_email        ?
_audit_contact_author_name         ''
_audit_contact_author_phone        ?
_publ_contact_author_id_orcid      ?
_publ_section_references
;
Dolomanov, O.V., Bourhis, L.J., Gildea, R.J, Howard, J.A.K. & Puschmann, H.
 (2009), J. Appl. Cryst. 42, 339-341.

Sheldrick, G.M. (2015). Acta Cryst. A71, 3-8.

Sheldrick, G.M. (2015). Acta Cryst. C71, 3-8.
;
_chemical_name_common              ?
_chemical_name_systematic          ?
_chemical_formula_moiety           'B4 H4 O9, 2(B H3 O3), 2(H2 O), 1(C8 H22 N2)'
_chemical_formula_sum              'C8 H36 B6 N2 O17'
_chemical_formula_weight           497.25
_chemical_absolute_configuration   .
_chemical_melting_point            ?
_chemical_oxdiff_formula           'C8 H30 B2 N6 O14'
_chemical_oxdiff_usercomment       MAB/TAR/B3(1)
loop_
  _atom_type_symbol
  _atom_type_description
  _atom_type_scat_dispersion_real
  _atom_type_scat_dispersion_imag
  _atom_type_scat_source
 'C' 'C' 0.0033 0.0016 'International Tables Vol C Tables 4.2.6.8 and 6.1.1.4'
 'H' 'H' 0.0000 0.0000 'International Tables Vol C Tables 4.2.6.8 and 6.1.1.4'
 'B' 'B' 0.0013 0.0007 'International Tables Vol C Tables 4.2.6.8 and 6.1.1.4'
 'N' 'N' 0.0061 0.0033 'International Tables Vol C Tables 4.2.6.8 and 6.1.1.4'
 'O' 'O' 0.0106 0.0060 'International Tables Vol C Tables 4.2.6.8 and 6.1.1.4'

_shelx_space_group_comment
;
The symmetry employed for this shelxl refinement is uniquely defined
by the following loop, which should always be used as a source of
symmetry information in preference to the above space-group names.
They are only intended as comments.
;
_space_group_crystal_system        'monoclinic'
_space_group_IT_number             4
_space_group_name_H-M_alt          'P 1 21 1'
_space_group_name_Hall             'P 2yb'
loop_
  _space_group_symop_operation_xyz
 'x, y, z'
 '-x, y+1/2, -z'

_cell_length_a                     9.0242(2)
_cell_length_b                     12.0350(3)
_cell_length_c                     11.1688(4)
_cell_angle_alpha                  90
_cell_angle_beta                   109.811(3)
_cell_angle_gamma                  90
_cell_volume                       1141.21(6)
_cell_formula_units_Z              2
_cell_measurement_reflns_used      13138
_cell_measurement_temperature      100(2)
_cell_measurement_theta_max        31.8400
_cell_measurement_theta_min        1.9280
_shelx_estimated_absorpt_T_max     0.997
_shelx_estimated_absorpt_T_min     0.983
_exptl_absorpt_coefficient_mu      0.131
_exptl_absorpt_correction_T_max    1.00000
_exptl_absorpt_correction_T_min    0.77165
_exptl_absorpt_correction_type     multi-scan
_exptl_absorpt_process_details
;
CrysAlisPro 1.171.40.53 (Rigaku Oxford Diffraction, 2019)
Empirical absorption correction using spherical harmonics,
 implemented in SCALE3 ABSPACK scaling algorithm.
;
_exptl_absorpt_special_details     ?
_exptl_crystal_colour              colourless
_exptl_crystal_colour_primary      colourless
_exptl_crystal_density_diffrn      1.447
_exptl_crystal_density_meas        ?
_exptl_crystal_density_method      ?
_exptl_crystal_description         plate
_exptl_crystal_F_000               528
_exptl_crystal_recrystallization_method 
 'The material was recrystallised from water'
_exptl_crystal_size_max            0.13
_exptl_crystal_size_mid            0.08
_exptl_crystal_size_min            0.025
_exptl_transmission_factor_max     ?
_exptl_transmission_factor_min     ?
_diffrn_reflns_av_R_equivalents    0.0265
_diffrn_reflns_av_unetI/netI       0.0224
_diffrn_reflns_Laue_measured_fraction_full  1.000
_diffrn_reflns_Laue_measured_fraction_max  1.000
_diffrn_reflns_limit_h_max         11
_diffrn_reflns_limit_h_min         -11
_diffrn_reflns_limit_k_max         15
_diffrn_reflns_limit_k_min         -15
_diffrn_reflns_limit_l_max         14
_diffrn_reflns_limit_l_min         -14
_diffrn_reflns_number              24237
_diffrn_reflns_point_group_measured_fraction_full  1.000
_diffrn_reflns_point_group_measured_fraction_max  0.995
_diffrn_reflns_theta_full          25.242
_diffrn_reflns_theta_max           27.480
_diffrn_reflns_theta_min           1.938
_diffrn_ambient_temperature        100(2)
_diffrn_detector                   'hybrid pixel detector'
_diffrn_detector_area_resol_mean   10
_diffrn_detector_dtime             0.000
_diffrn_detector_type              'Rigaku, HyPix 6000'
_diffrn_measured_fraction_theta_full  1.000
_diffrn_measured_fraction_theta_max  1.000
_diffrn_measurement_details
;
List of Runs (angles in degrees, time in seconds):

  # Type    Start    End  Width  t~exp~   \w     \q     \k     \f   Frames
--------------------------------------------------------------------------
  1  \w    -97.00  25.00   0.50    3.00    --   -8.00 -57.00-120.00  244
  2  \w    -97.00  29.00   0.50    3.00    --   -8.00 -38.00  30.00  252
  3  \w    -97.00 -22.00   0.50    3.00    --   -8.00 -65.00   0.00  150
  4  \w    -42.00  81.00   0.50    3.00    --   -8.00  65.00 120.00  246
  5  \w    -45.00  81.00   0.50    3.00    --   -8.00  38.00-150.00  252
  6  \w    -45.00  43.00   0.50    3.00    --   -8.00  38.00   0.00  176
;
_diffrn_measurement_device         'four-circle diffractometer'
_diffrn_measurement_device_details  'Rigaku, AFC12 \k goniometer'
_diffrn_measurement_device_type   
 'Rigaku FRE+ equipped with VHF Varimax confocal mirrors and an AFC12 goniometer and HyPix 6000 detector'
_diffrn_measurement_method         'profile data from \w-scans'
_diffrn_measurement_specimen_support  'MiTeGen MicroLoop'
_diffrn_orient_matrix_type        
 'CrysAlisPro convention (1999,Acta A55,543-557)'
_diffrn_orient_matrix_UB_11        -0.0186161000
_diffrn_orient_matrix_UB_12        0.0571946000
_diffrn_orient_matrix_UB_13        0.0011163000
_diffrn_orient_matrix_UB_21        -0.0221836000
_diffrn_orient_matrix_UB_22        -0.0092805000
_diffrn_orient_matrix_UB_23        0.0543289000
_diffrn_orient_matrix_UB_31        0.0783128000
_diffrn_orient_matrix_UB_32        0.0109955000
_diffrn_orient_matrix_UB_33        0.0400225000
_diffrn_radiation_collimation      0.2
_diffrn_radiation_monochromator    'Confocal mirrors, VHF Varimax'
_diffrn_radiation_probe            x-ray
_diffrn_radiation_type             'Mo K\a'
_diffrn_radiation_wavelength       0.71075
_diffrn_radiation_xray_symbol      K-L~3~
_diffrn_source                     'Rotating Anode'
_diffrn_source_current             55.0
_diffrn_source_power               2.475
_diffrn_source_target              Mo
_diffrn_source_type                'Rigaku FRE+'
_diffrn_source_voltage             45.0
_reflns_Friedel_coverage           0.899
_reflns_Friedel_fraction_full      0.999
_reflns_Friedel_fraction_max       0.990
_reflns_number_gt                  4895
_reflns_number_total               5229
_reflns_odcompleteness_completeness  99.96
_reflns_odcompleteness_iscentric   1
_reflns_odcompleteness_theta       27.42
_reflns_special_details
;
 Reflections were merged by SHELXL according to the crystal
 class for the calculation of statistics and refinement.
 
 _reflns_Friedel_fraction is defined as the number of unique
 Friedel pairs measured divided by the number that would be
 possible theoretically, ignoring centric projections and
 systematic absences.
;
_reflns_threshold_expression       'I > 2\s(I)'
_computing_cell_refinement         'CrysAlisPro 1.171.40.53 (Rigaku OD, 2019)'
_computing_data_collection         'CrysAlisPro 1.171.39.28e (Rigaku OD, 2015)'
_computing_data_reduction          'CrysAlisPro 1.171.40.53 (Rigaku OD, 2019)'
_computing_molecular_graphics      'Olex2 1.3 (Dolomanov et al., 2009)'
_computing_publication_material    'Olex2 1.3 (Dolomanov et al., 2009)'
_computing_structure_refinement    'ShelXL 2018/3 (Sheldrick, 2015)'
_computing_structure_solution      'SHELXT 2018/2 (Sheldrick, 2018)'
_refine_diff_density_max           0.201
_refine_diff_density_min           -0.386
_refine_diff_density_rms           0.041
_refine_ls_abs_structure_details
;
 Flack x determined using 2117 quotients [(I+)-(I-)]/[(I+)+(I-)]
 (Parsons, Flack and Wagner, Acta Cryst. B69 (2013) 249-259).
;
_refine_ls_abs_structure_Flack     -0.2(2)
_refine_ls_extinction_coef         .
_refine_ls_extinction_method       none
_refine_ls_goodness_of_fit_ref     1.059
_refine_ls_hydrogen_treatment      constr
_refine_ls_matrix_type             full
_refine_ls_number_parameters       449
_refine_ls_number_reflns           5229
_refine_ls_number_restraints       974
_refine_ls_R_factor_all            0.0337
_refine_ls_R_factor_gt             0.0303
_refine_ls_restrained_S_all        1.021
_refine_ls_shift/su_max            0.000
_refine_ls_shift/su_mean           0.000
_refine_ls_structure_factor_coef   Fsqd
_refine_ls_weighting_details      
 'w=1/[\s^2^(Fo^2^)+(0.0536P)^2^+0.0601P] where P=(Fo^2^+2Fc^2^)/3'
_refine_ls_weighting_scheme        calc
_refine_ls_wR_factor_gt            0.0785
_refine_ls_wR_factor_ref           0.0802
_refine_special_details           
 'There is disorder of the ammonium cation and a boric acid. As such various restraints (SAME, SIMU, RIGU, DELU and SUMP) have been applied. Also the atoms of the 2 lesser components of the ammonium cation have been left isotropic.'
_olex2_refinement_description
;
1. Fixed Uiso
 At 1.2 times of:
  All C(H,H) groups
 At 1.5 times of:
  All C(H,H,H) groups, All O(H) groups, All O(H,H) groups
2. Restrained distances
 O6_$5-H23A
 2 with sigma of 0.03
3. Uiso/Uaniso restraints and constraints
All non-hydrogen atoms have similar U: within 2A with sigma of 0.02 and sigma
for terminal atoms of 0.04 within 2A
Uanis(B21) = Uanis(B21A)
4. Rigid body (RIGU) restrains
 All non-hydrogen atoms
 with sigma for 1-2 distances of 0.002 and sigma for 1-3 distances of 0.002
5. Same fragment restrains
{N1, N2, C1, C2, C3, C4, C5, C6, C7, C8} sigma for 1-2: 0.02, 1-3: 0.04
as in
{N1B, N2B, C1B, C2B, C3B, C4B, C5B, C6B, C7B, C8B}
{N1, N2, C1, C2, C3, C4, C5, C6, C7, C8} sigma for 1-2: 0.02, 1-3: 0.04
as in
{N1C, N2C, C1C, C2C, C3C, C4C, C5C, C6C, C7C, C8C}
6. Others
 1*[Sof(N1)+Sof(N2)+Sof(C1)+Sof(H1A)+Sof(H1B)+Sof(C2)+Sof(H2A)+Sof(H2B)+
 Sof(C3)+Sof(H3A)+Sof(H3B)+Sof(H3C)+Sof(C4)+Sof(H4A)+Sof(H4B)+Sof(H4C)+Sof(C5)+
 Sof(H5A)+Sof(H5B)+Sof(H5C)+Sof(C6)+Sof(H6A)+Sof(H6B)+Sof(H6C)+Sof(C7)+Sof(H7A)+
 Sof(H7B)+Sof(H7C)+Sof(C8)+Sof(H8A)+Sof(H8B)+Sof(H8C)]+1*[Sof(N1B)+Sof(N2B)+
 Sof(C1B)+Sof(H1BA)+Sof(H1BB)+Sof(C2B)+Sof(H2BA)+Sof(H2BB)+Sof(C3B)+Sof(H3BA)+
 Sof(H3BB)+Sof(H3BC)+Sof(C4B)+Sof(H4BA)+Sof(H4BB)+Sof(H4BC)+Sof(C5B)+Sof(H5BA)+
 Sof(H5BB)+Sof(H5BC)+Sof(C6B)+Sof(H6BA)+Sof(H6BB)+Sof(H6BC)+Sof(C7B)+Sof(H7BA)+
 Sof(H7BB)+Sof(H7BC)+Sof(C8B)+Sof(H8BA)+Sof(H8BB)+Sof(H8BC)]+1*[Sof(N1C)+
 Sof(N2C)+Sof(C1C)+Sof(H1CA)+Sof(H1CB)+Sof(C2C)+Sof(H2CA)+Sof(H2CB)+Sof(C3C)+
 Sof(H3CA)+Sof(H3CB)+Sof(H3CC)+Sof(C4C)+Sof(H4CA)+Sof(H4CB)+Sof(H4CC)+Sof(C5C)+
 Sof(H5CA)+Sof(H5CB)+Sof(H5CC)+Sof(C6C)+Sof(H6CA)+Sof(H6CB)+Sof(H6CC)+Sof(C7C)+
 Sof(H7CA)+Sof(H7CB)+Sof(H7CC)+Sof(C8C)+Sof(H8CA)+Sof(H8CB)+Sof(H8CC)]=1 with
 esd of 0.0001
 Sof(N1)=Sof(N2)=Sof(C1)=Sof(H1A)=Sof(H1B)=Sof(C2)=Sof(H2A)=Sof(H2B)=Sof(C3)=
 Sof(H3A)=Sof(H3B)=Sof(H3C)=Sof(C4)=Sof(H4A)=Sof(H4B)=Sof(H4C)=Sof(C5)=Sof(H5A)=
 Sof(H5B)=Sof(H5C)=Sof(C6)=Sof(H6A)=Sof(H6B)=Sof(H6C)=Sof(C7)=Sof(H7A)=Sof(H7B)=
 Sof(H7C)=Sof(C8)=Sof(H8A)=Sof(H8B)=Sof(H8C)=FVAR(1)
 Sof(N1B)=Sof(N2B)=Sof(C1B)=Sof(H1BA)=Sof(H1BB)=Sof(C2B)=Sof(H2BA)=Sof(H2BB)=
 Sof(C3B)=Sof(H3BA)=Sof(H3BB)=Sof(H3BC)=Sof(C4B)=Sof(H4BA)=Sof(H4BB)=Sof(H4BC)=
 Sof(C5B)=Sof(H5BA)=Sof(H5BB)=Sof(H5BC)=Sof(C6B)=Sof(H6BA)=Sof(H6BB)=Sof(H6BC)=
 Sof(C7B)=Sof(H7BA)=Sof(H7BB)=Sof(H7BC)=Sof(C8B)=Sof(H8BA)=Sof(H8BB)=Sof(H8BC)=
 FVAR(2)
 Sof(N1C)=Sof(N2C)=Sof(C1C)=Sof(H1CA)=Sof(H1CB)=Sof(C2C)=Sof(H2CA)=Sof(H2CB)=
 Sof(C3C)=Sof(H3CA)=Sof(H3CB)=Sof(H3CC)=Sof(C4C)=Sof(H4CA)=Sof(H4CB)=Sof(H4CC)=
 Sof(C5C)=Sof(H5CA)=Sof(H5CB)=Sof(H5CC)=Sof(C6C)=Sof(H6CA)=Sof(H6CB)=Sof(H6CC)=
 Sof(C7C)=Sof(H7CA)=Sof(H7CB)=Sof(H7CC)=Sof(C8C)=Sof(H8CA)=Sof(H8CB)=Sof(H8CC)=
 FVAR(3)
 Sof(B21A)=Sof(O21A)=Sof(H21A)=Sof(O22A)=Sof(H22A)=Sof(O23A)=Sof(H23A)=1-FVAR(4)
 Sof(O21)=Sof(H21)=Sof(O22)=Sof(H22)=Sof(O23)=Sof(H23)=Sof(B21)=FVAR(4)
7.a Free rotating group:
 O32(H32A,H32B), O31(H31A,H31B)
7.b Secondary CH2 refined with riding coordinates:
 C1(H1A,H1B), C2(H2A,H2B), C1B(H1BA,H1BB), C2B(H2BA,H2BB), C1C(H1CA,H1CB),
 C2C(H2CA,H2CB)
7.c Idealised Me refined as rotating group:
 C3(H3A,H3B,H3C), C4(H4A,H4B,H4C), C5(H5A,H5B,H5C), C6(H6A,H6B,H6C), C7(H7A,
 H7B,H7C), C8(H8A,H8B,H8C), C3B(H3BA,H3BB,H3BC), C4B(H4BA,H4BB,H4BC), C5B(H5BA,
 H5BB,H5BC), C6B(H6BA,H6BB,H6BC), C7B(H7BA,H7BB,H7BC), C8B(H8BA,H8BB,H8BC),
 C3C(H3CA,H3CB,H3CC), C4C(H4CA,H4CB,H4CC), C5C(H5CA,H5CB,H5CC), C6C(H6CA,H6CB,
 H6CC), C7C(H7CA,H7CB,H7CC), C8C(H8CA,H8CB,H8CC)
7.d Idealised tetrahedral OH refined as rotating group:
 O6(H6), O7(H7), O8(H8), O9(H9), O11(H11), O12(H12), O13(H13), O21(H21),
 O22(H22), O23(H23), O21A(H21A), O22A(H22A), O23A(H23A)
;
_atom_sites_solution_hydrogens     mixed
_atom_sites_solution_primary       dual
_atom_sites_solution_secondary     ?
loop_
  _atom_site_label
  _atom_site_type_symbol
  _atom_site_fract_x
  _atom_site_fract_y
  _atom_site_fract_z
  _atom_site_U_iso_or_equiv
  _atom_site_adp_type
  _atom_site_occupancy
  _atom_site_site_symmetry_order
  _atom_site_calc_flag
  _atom_site_refinement_flags_posn
  _atom_site_refinement_flags_adp
  _atom_site_refinement_flags_occupancy
  _atom_site_disorder_assembly
  _atom_site_disorder_group
 O1 O 0.18220(14) 0.75561(11) 0.30437(12) 0.0116(3) Uani 1 1 d . U . . .
 O2 O 0.30250(14) 0.58220(11) 0.39545(12) 0.0131(3) Uani 1 1 d . U . . .
 O3 O 0.07539(15) 0.58144(12) 0.20677(13) 0.0155(3) Uani 1 1 d . U . . .
 O4 O 0.22110(15) 0.70140(12) 0.11060(13) 0.0145(3) Uani 1 1 d . U . . .
 O5 O 0.44180(14) 0.71440(11) 0.30416(12) 0.0129(3) Uani 1 1 d . U . . .
 O6 O 0.40234(15) 0.74896(11) 0.50328(12) 0.0139(3) Uani 1 1 d . U . . .
 H6 H 0.429172 0.813225 0.497251 0.021 Uiso 1 1 calc R U . . .
 O7 O -0.03895(14) 0.74886(11) 0.10680(12) 0.0138(3) Uani 1 1 d . U . . .
 H7 H -0.022105 0.807207 0.075732 0.021 Uiso 1 1 calc R U . . .
 O8 O 0.13153(16) 0.42503(13) 0.33725(14) 0.0201(3) Uani 1 1 d . U . . .
 H8 H 0.190978 0.404405 0.406954 0.030 Uiso 1 1 calc R U . . .
 O9 O 0.46917(15) 0.73788(15) 0.10066(13) 0.0232(3) Uani 1 1 d . U . . .
 H9 H 0.561457 0.743734 0.146662 0.035 Uiso 1 1 calc R U . . .
 O11 O -0.22495(15) 0.76541(13) 0.24017(14) 0.0198(3) Uani 1 1 d . U . . .
 H11 H -0.154553 0.763868 0.209212 0.030 Uiso 1 1 calc R U . . .
 O12 O -0.26192(16) 0.80468(14) 0.43505(14) 0.0207(3) Uani 1 1 d . U . . .
 H12 H -0.349631 0.781359 0.393322 0.031 Uiso 1 1 calc R U . . .
 O13 O -0.00883(16) 0.81658(14) 0.42694(14) 0.0226(3) Uani 1 1 d . U . . .
 H13 H 0.042335 0.798757 0.381714 0.034 Uiso 1 1 calc R U . . .
 O21 O 0.2414(7) 0.9667(3) 0.2654(5) 0.0243(10) Uani 0.76(2) 1 d . U P A 1
 H21 H 0.227388 0.906443 0.294218 0.037 Uiso 0.76(2) 1 calc R U P A 1
 O22 O 0.4536(17) 0.9687(12) 0.4617(9) 0.020(2) Uani 0.76(2) 1 d . U P A 1
 H22 H 0.522510 1.011024 0.504265 0.030 Uiso 0.76(2) 1 calc R U P A 1
 O23 O 0.3847(8) 1.1293(3) 0.3262(4) 0.0269(11) Uani 0.76(2) 1 d . U P A 1
 H23 H 0.460549 1.155373 0.382786 0.040 Uiso 0.76(2) 1 calc R U P A 1
 O32 O 0.0195(2) 0.94598(14) 1.00868(16) 0.0323(4) Uani 1 1 d G . . . .
 H32A H -0.015085 0.990767 0.946451 0.049 Uiso 1 1 d G U . . .
 H32B H 0.100965 0.973499 1.063761 0.049 Uiso 1 1 d G U . . .
 B1 B 0.3315(2) 0.70225(17) 0.3777(2) 0.0116(4) Uani 1 1 d . U . . .
 B2 B 0.1105(2) 0.69810(17) 0.1817(2) 0.0122(4) Uani 1 1 d . U . . .
 B3 B 0.1712(2) 0.53056(19) 0.3138(2) 0.0138(4) Uani 1 1 d . U . . .
 B4 B 0.3768(2) 0.71901(18) 0.1742(2) 0.0137(4) Uani 1 1 d . U . . .
 B11 B -0.1636(2) 0.79497(18) 0.3651(2) 0.0150(4) Uani 1 1 d . U . . .
 B21 B 0.3647(7) 1.0206(4) 0.3534(6) 0.0182(10) Uani 0.76(2) 1 d . U P A 1
 O31 O 0.6875(2) 0.6604(2) 0.9340(2) 0.0506(6) Uani 1 1 d G . . . .
 H31A H 0.780216 0.681400 0.976984 0.076 Uiso 1 1 d G U . . .
 H31B H 0.678830 0.654948 0.856044 0.076 Uiso 1 1 d G U . . .
 N1 N 0.1668(9) 0.6363(6) 0.7726(8) 0.0169(15) Uani 0.474(4) 1 d D U P B 1
 N2 N 0.3381(6) 0.9267(4) 0.7646(5) 0.0138(9) Uani 0.474(4) 1 d D U P B 1
 C1 C 0.2930(5) 0.7244(4) 0.8044(4) 0.0202(9) Uani 0.474(4) 1 d D U P B 1
 H1A H 0.388800 0.693210 0.797353 0.024 Uiso 0.474(4) 1 calc R U P B 1
 H1B H 0.315395 0.748580 0.891590 0.024 Uiso 0.474(4) 1 calc R U P B 1
 C2 C 0.2423(5) 0.8235(4) 0.7160(4) 0.0173(9) Uani 0.474(4) 1 d D U P B 1
 H2A H 0.250286 0.804079 0.634099 0.021 Uiso 0.474(4) 1 calc R U P B 1
 H2B H 0.132575 0.839533 0.702847 0.021 Uiso 0.474(4) 1 calc R U P B 1
 C3 C 0.1178(10) 0.6017(6) 0.6357(6) 0.0247(15) Uani 0.474(4) 1 d D U P B 1
 H3A H 0.064777 0.662297 0.582521 0.037 Uiso 0.474(4) 1 calc R U P B 1
 H3B H 0.047893 0.539162 0.621847 0.037 Uiso 0.474(4) 1 calc R U P B 1
 H3C H 0.209250 0.581429 0.615218 0.037 Uiso 0.474(4) 1 calc R U P B 1
 C4 C 0.2337(10) 0.5387(8) 0.8598(9) 0.030(2) Uani 0.474(4) 1 d D U P B 1
 H4A H 0.323003 0.509277 0.842161 0.045 Uiso 0.474(4) 1 calc R U P B 1
 H4B H 0.154679 0.482106 0.845789 0.045 Uiso 0.474(4) 1 calc R U P B 1
 H4C H 0.265807 0.562941 0.946778 0.045 Uiso 0.474(4) 1 calc R U P B 1
 C5 C 0.0238(12) 0.6771(9) 0.8010(11) 0.0221(19) Uani 0.474(4) 1 d D U P B 1
 H5A H 0.056921 0.714510 0.881670 0.033 Uiso 0.474(4) 1 calc R U P B 1
 H5B H -0.041725 0.615026 0.803797 0.033 Uiso 0.474(4) 1 calc R U P B 1
 H5C H -0.034527 0.727683 0.735518 0.033 Uiso 0.474(4) 1 calc R U P B 1
 C6 C 0.5069(8) 0.9030(6) 0.7865(7) 0.0226(13) Uani 0.474(4) 1 d D U P B 1
 H6A H 0.548320 0.856413 0.860122 0.034 Uiso 0.474(4) 1 calc R U P B 1
 H6B H 0.564710 0.971489 0.800036 0.034 Uiso 0.474(4) 1 calc R U P B 1
 H6C H 0.516542 0.865743 0.713518 0.034 Uiso 0.474(4) 1 calc R U P B 1
 C7 C 0.3535(16) 0.9660(11) 0.9023(10) 0.055(3) Uani 0.474(4) 1 d D U P B 1
 H7A H 0.250478 0.974331 0.908315 0.083 Uiso 0.474(4) 1 calc R U P B 1
 H7B H 0.407801 1.035911 0.919832 0.083 Uiso 0.474(4) 1 calc R U P B 1
 H7C H 0.411778 0.911698 0.963080 0.083 Uiso 0.474(4) 1 calc R U P B 1
 C8 C 0.2793(7) 1.0125(7) 0.6635(8) 0.0272(14) Uani 0.474(4) 1 d D U P B 1
 H8A H 0.283979 0.983979 0.584582 0.041 Uiso 0.474(4) 1 calc R U P B 1
 H8B H 0.343616 1.077852 0.687019 0.041 Uiso 0.474(4) 1 calc R U P B 1
 H8C H 0.172276 1.030952 0.653639 0.041 Uiso 0.474(4) 1 calc R U P B 1
 N1B N 0.1299(15) 0.6486(10) 0.7410(12) 0.028(4) Uiso 0.287(4) 1 d D U P C 2
 N2B N 0.3430(9) 0.9318(6) 0.8176(8) 0.0148(17) Uiso 0.287(4) 1 d D U P C 2
 C1B C 0.1994(8) 0.7579(6) 0.7138(7) 0.0192(15) Uiso 0.287(4) 1 d D U P C 2
 H1BA H 0.294762 0.742412 0.695099 0.023 Uiso 0.287(4) 1 calc R U P C 2
 H1BB H 0.124771 0.792910 0.639515 0.023 Uiso 0.287(4) 1 calc R U P C 2
 C2B C 0.2371(8) 0.8368(6) 0.8261(7) 0.0178(15) Uiso 0.287(4) 1 d D U P C 2
 H2BA H 0.139568 0.866945 0.830858 0.021 Uiso 0.287(4) 1 calc R U P C 2
 H2BB H 0.288015 0.795602 0.903889 0.021 Uiso 0.287(4) 1 calc R U P C 2
 C3B C 0.0611(13) 0.5912(9) 0.6168(9) 0.025(3) Uiso 0.287(4) 1 d D U P C 2
 H3BA H -0.020010 0.636821 0.560315 0.037 Uiso 0.287(4) 1 calc R U P C 2
 H3BB H 0.016792 0.521512 0.629386 0.037 Uiso 0.287(4) 1 calc R U P C 2
 H3BC H 0.141873 0.578314 0.580485 0.037 Uiso 0.287(4) 1 calc R U P C 2
 C4B C 0.2575(13) 0.5801(10) 0.8321(12) 0.030(4) Uiso 0.287(4) 1 d D U P C 2
 H4BA H 0.341989 0.570395 0.798973 0.045 Uiso 0.287(4) 1 calc R U P C 2
 H4BB H 0.216019 0.508757 0.842712 0.045 Uiso 0.287(4) 1 calc R U P C 2
 H4BC H 0.296393 0.617209 0.912802 0.045 Uiso 0.287(4) 1 calc R U P C 2
 C5B C -0.003(2) 0.6667(19) 0.793(2) 0.022(4) Uiso 0.287(4) 1 d D U P C 2
 H5BA H 0.040120 0.682725 0.882561 0.034 Uiso 0.287(4) 1 calc R U P C 2
 H5BB H -0.066499 0.600758 0.780346 0.034 Uiso 0.287(4) 1 calc R U P C 2
 H5BC H -0.066918 0.727911 0.749759 0.034 Uiso 0.287(4) 1 calc R U P C 2
 C6B C 0.5043(12) 0.8911(9) 0.8338(12) 0.028(3) Uiso 0.287(4) 1 d D U P C 2
 H6BA H 0.543239 0.848180 0.910629 0.041 Uiso 0.287(4) 1 calc R U P C 2
 H6BB H 0.572659 0.953352 0.838949 0.041 Uiso 0.287(4) 1 calc R U P C 2
 H6BC H 0.501015 0.845523 0.762453 0.041 Uiso 0.287(4) 1 calc R U P C 2
 C7B C 0.3518(11) 1.0089(9) 0.9243(10) 0.027(2) Uiso 0.287(4) 1 d D U P C 2
 H7BA H 0.250308 1.041759 0.909934 0.041 Uiso 0.287(4) 1 calc R U P C 2
 H7BB H 0.427435 1.066218 0.928815 0.041 Uiso 0.287(4) 1 calc R U P C 2
 H7BC H 0.383327 0.968244 1.002944 0.041 Uiso 0.287(4) 1 calc R U P C 2
 C8B C 0.2751(17) 0.9900(16) 0.6961(12) 0.027(4) Uiso 0.287(4) 1 d D U P C 2
 H8BA H 0.288744 0.945795 0.629077 0.041 Uiso 0.287(4) 1 calc R U P C 2
 H8BB H 0.327163 1.060152 0.700129 0.041 Uiso 0.287(4) 1 calc R U P C 2
 H8BC H 0.164788 1.002227 0.679543 0.041 Uiso 0.287(4) 1 calc R U P C 2
 N1C N 0.142(2) 0.6458(15) 0.761(2) 0.023(5) Uiso 0.239(4) 1 d D U P D 3
 N2C N 0.3905(11) 0.9115(7) 0.7970(9) 0.010(2) Uiso 0.239(4) 1 d D U P D 3
 C1C C 0.1922(10) 0.7647(8) 0.7977(9) 0.0202(19) Uiso 0.239(4) 1 d D U P D 3
 H1CA H 0.193231 0.778228 0.883606 0.024 Uiso 0.239(4) 1 calc R U P D 3
 H1CB H 0.116247 0.814813 0.741037 0.024 Uiso 0.239(4) 1 calc R U P D 3
 C2C C 0.3550(9) 0.7886(7) 0.7911(8) 0.0160(17) Uiso 0.239(4) 1 d D U P D 3
 H2CA H 0.433761 0.751491 0.861197 0.019 Uiso 0.239(4) 1 calc R U P D 3
 H2CB H 0.361419 0.758504 0.712398 0.019 Uiso 0.239(4) 1 calc R U P D 3
 C3C C 0.1623(19) 0.6064(14) 0.6381(15) 0.028(4) Uiso 0.239(4) 1 d D U P D 3
 H3CA H 0.117046 0.659955 0.572135 0.043 Uiso 0.239(4) 1 calc R U P D 3
 H3CB H 0.110163 0.536235 0.613852 0.043 Uiso 0.239(4) 1 calc R U P D 3
 H3CC H 0.272404 0.598036 0.650773 0.043 Uiso 0.239(4) 1 calc R U P D 3
 C4C C 0.245(2) 0.5660(15) 0.856(2) 0.015(3) Uiso 0.239(4) 1 d D U P D 3
 H4CA H 0.349113 0.566361 0.850983 0.022 Uiso 0.239(4) 1 calc R U P D 3
 H4CB H 0.201631 0.492521 0.838913 0.022 Uiso 0.239(4) 1 calc R U P D 3
 H4CC H 0.250526 0.587901 0.940375 0.022 Uiso 0.239(4) 1 calc R U P D 3
 C5C C -0.0207(16) 0.6318(14) 0.7622(15) 0.044(4) Uiso 0.239(4) 1 d D U P D 3
 H5CA H -0.022376 0.646328 0.846279 0.066 Uiso 0.239(4) 1 calc R U P D 3
 H5CB H -0.055509 0.557145 0.738050 0.066 Uiso 0.239(4) 1 calc R U P D 3
 H5CC H -0.089659 0.682958 0.703245 0.066 Uiso 0.239(4) 1 calc R U P D 3
 C6C C 0.5544(13) 0.9198(10) 0.8060(12) 0.015(3) Uiso 0.239(4) 1 d D U P D 3
 H6CA H 0.618349 0.876114 0.876462 0.022 Uiso 0.239(4) 1 calc R U P D 3
 H6CB H 0.587370 0.996081 0.818625 0.022 Uiso 0.239(4) 1 calc R U P D 3
 H6CC H 0.566011 0.892843 0.728737 0.022 Uiso 0.239(4) 1 calc R U P D 3
 C7C C 0.3133(16) 0.9686(14) 0.8799(12) 0.013(3) Uiso 0.239(4) 1 d D U P D 3
 H7CA H 0.200986 0.963091 0.841531 0.020 Uiso 0.239(4) 1 calc R U P D 3
 H7CB H 0.343557 1.045483 0.889164 0.020 Uiso 0.239(4) 1 calc R U P D 3
 H7CC H 0.346107 0.933828 0.962127 0.020 Uiso 0.239(4) 1 calc R U P D 3
 C8C C 0.2875(16) 0.9738(13) 0.6796(14) 0.021(4) Uiso 0.239(4) 1 d D U P D 3
 H8CA H 0.276061 0.930255 0.604991 0.031 Uiso 0.239(4) 1 calc R U P D 3
 H8CB H 0.335879 1.043635 0.673406 0.031 Uiso 0.239(4) 1 calc R U P D 3
 H8CC H 0.185714 0.986852 0.686389 0.031 Uiso 0.239(4) 1 calc R U P D 3
 B21A B 0.390(2) 1.0181(15) 0.3253(19) 0.0182(10) Uani 0.24(2) 1 d . U P A 2
 O21A O 0.2821(17) 0.9585(9) 0.2349(15) 0.017(3) Uani 0.24(2) 1 d . U P A 2
 H21A H 0.257569 0.903552 0.267500 0.026 Uiso 0.24(2) 1 calc R U P A 2
 O22A O 0.457(5) 0.969(4) 0.442(3) 0.014(3) Uani 0.24(2) 1 d . U P A 2
 H22A H 0.540640 0.999676 0.480696 0.021 Uiso 0.24(2) 1 calc R U P A 2
 O23A O 0.4348(18) 1.1175(8) 0.2956(16) 0.023(3) Uani 0.24(2) 1 d . U P A 2
 H23A H 0.510986 1.139842 0.354660 0.035 Uiso 0.24(2) 1 calc DR U P A 2

loop_
  _atom_site_aniso_label
  _atom_site_aniso_U_11
  _atom_site_aniso_U_22
  _atom_site_aniso_U_33
  _atom_site_aniso_U_23
  _atom_site_aniso_U_13
  _atom_site_aniso_U_12
 O1 0.0090(6) 0.0115(6) 0.0136(6) -0.0010(5) 0.0029(5) 0.0013(5)
 O2 0.0123(6) 0.0111(6) 0.0134(6) 0.0011(5) 0.0010(5) -0.0008(5)
 O3 0.0130(6) 0.0128(6) 0.0163(7) 0.0004(5) -0.0005(5) -0.0014(5)
 O4 0.0103(6) 0.0184(7) 0.0135(6) -0.0023(5) 0.0022(5) 0.0004(5)
 O5 0.0092(6) 0.0136(6) 0.0146(6) 0.0008(5) 0.0022(5) 0.0003(5)
 O6 0.0131(6) 0.0108(6) 0.0150(7) -0.0016(5) 0.0012(5) -0.0007(5)
 O7 0.0097(6) 0.0154(6) 0.0146(7) 0.0023(5) 0.0018(5) 0.0010(5)
 O8 0.0199(7) 0.0164(7) 0.0179(7) 0.0043(6) -0.0015(6) -0.0052(6)
 O9 0.0108(6) 0.0430(10) 0.0149(7) 0.0011(7) 0.0034(5) 0.0004(6)
 O11 0.0106(6) 0.0316(8) 0.0177(7) -0.0017(6) 0.0057(5) -0.0008(5)
 O12 0.0119(6) 0.0300(8) 0.0203(7) -0.0097(6) 0.0056(5) -0.0038(6)
 O13 0.0134(6) 0.0331(8) 0.0217(7) -0.0108(6) 0.0065(6) -0.0022(6)
 O21 0.0276(19) 0.0149(13) 0.0203(16) 0.0039(11) -0.0053(13) -0.0057(12)
 O22 0.017(2) 0.0148(18) 0.018(3) 0.000(2) -0.007(2) -0.0056(16)
 O23 0.037(2) 0.0172(11) 0.0152(15) 0.0011(9) -0.0055(13) -0.0111(12)
 O32 0.0367(10) 0.0237(9) 0.0222(8) 0.0097(7) -0.0089(7) -0.0114(7)
 B1 0.0096(8) 0.0106(9) 0.0135(9) -0.0001(7) 0.0024(7) 0.0011(7)
 B2 0.0097(8) 0.0111(9) 0.0138(9) 0.0003(7) 0.0014(7) 0.0003(7)
 B3 0.0121(9) 0.0140(9) 0.0141(10) -0.0008(8) 0.0027(8) -0.0010(7)
 B4 0.0123(9) 0.0140(9) 0.0142(9) 0.0005(8) 0.0037(7) 0.0021(7)
 B11 0.0136(9) 0.0133(10) 0.0176(10) -0.0016(8) 0.0046(8) 0.0010(8)
 B21 0.021(2) 0.0154(11) 0.015(2) -0.0006(14) 0.0022(14) -0.0030(12)
 O31 0.0384(10) 0.0791(16) 0.0326(11) -0.0061(11) 0.0096(8) -0.0200(10)
 N1 0.018(3) 0.010(2) 0.020(3) -0.0065(18) 0.003(2) -0.010(2)
 N2 0.0078(19) 0.0161(19) 0.014(2) -0.0058(17) -0.0006(18) -0.0020(15)
 C1 0.0157(19) 0.019(2) 0.023(2) -0.0015(16) 0.0027(16) -0.0062(16)
 C2 0.0182(19) 0.0142(18) 0.018(2) -0.0036(15) 0.0038(15) -0.0047(15)
 C3 0.013(4) 0.041(4) 0.019(3) -0.004(2) 0.004(3) -0.009(3)
 C4 0.040(4) 0.020(3) 0.031(3) 0.007(3) 0.012(2) 0.002(3)
 C5 0.021(3) 0.019(3) 0.026(4) 0.003(2) 0.008(3) -0.006(3)
 C6 0.012(2) 0.025(3) 0.023(4) -0.009(2) -0.003(2) -0.005(2)
 C7 0.093(9) 0.043(5) 0.050(5) -0.022(4) 0.050(6) -0.010(5)
 C8 0.024(3) 0.016(3) 0.039(4) 0.004(3) 0.008(3) 0.001(2)
 B21A 0.021(2) 0.0154(11) 0.015(2) -0.0006(14) 0.0022(14) -0.0030(12)
 O21A 0.014(4) 0.009(3) 0.022(5) 0.002(3) -0.003(3) 0.002(3)
 O22A 0.016(6) 0.009(5) 0.017(5) -0.002(5) 0.005(5) -0.003(4)
 O23A 0.023(5) 0.015(3) 0.023(5) 0.002(3) -0.004(4) -0.005(3)

_geom_special_details
;
 All esds (except the esd in the dihedral angle between two l.s. planes)
 are estimated using the full covariance matrix.  The cell esds are taken
 into account individually in the estimation of esds in distances, angles
 and torsion angles; correlations between esds in cell parameters are only
 used when they are defined by crystal symmetry.  An approximate (isotropic)
 treatment of cell esds is used for estimating esds involving l.s. planes.
;
loop_
  _geom_bond_atom_site_label_1
  _geom_bond_atom_site_label_2
  _geom_bond_distance
  _geom_bond_site_symmetry_2
  _geom_bond_publ_flag
 O1 B1 1.466(2) . ?
 O1 B2 1.475(2) . ?
 O2 B1 1.493(2) . ?
 O2 B3 1.375(3) . ?
 O3 B2 1.487(2) . ?
 O3 B3 1.360(3) . ?
 O4 B2 1.471(2) . ?
 O4 B4 1.359(2) . ?
 O5 B1 1.497(2) . ?
 O5 B4 1.370(3) . ?
 O6 H6 0.8200 . ?
 O6 B1 1.444(2) . ?
 O7 H7 0.8200 . ?
 O7 B2 1.458(2) . ?
 O8 H8 0.8200 . ?
 O8 B3 1.369(3) . ?
 O9 H9 0.8200 . ?
 O9 B4 1.373(2) . ?
 O11 H11 0.8200 . ?
 O11 B11 1.362(3) . ?
 O12 H12 0.8200 . ?
 O12 B11 1.372(2) . ?
 O13 H13 0.8200 . ?
 O13 B11 1.357(3) . ?
 O21 H21 0.8200 . ?
 O21 B21 1.373(5) . ?
 O22 H22 0.8200 . ?
 O22 B21 1.356(9) . ?
 O23 H23 0.8200 . ?
 O23 B21 1.368(5) . ?
 O32 H32A 0.8509 . ?
 O32 H32B 0.8499 . ?
 O31 H31A 0.8495 . ?
 O31 H31B 0.8501 . ?
 N1 C1 1.507(7) . ?
 N1 C3 1.499(8) . ?
 N1 C4 1.514(10) . ?
 N1 C5 1.512(11) . ?
 N2 C2 1.506(6) . ?
 N2 C6 1.486(8) . ?
 N2 C7 1.569(9) . ?
 N2 C8 1.489(9) . ?
 C1 H1A 0.9700 . ?
 C1 H1B 0.9700 . ?
 C1 C2 1.517(6) . ?
 C2 H2A 0.9700 . ?
 C2 H2B 0.9700 . ?
 C3 H3A 0.9600 . ?
 C3 H3B 0.9600 . ?
 C3 H3C 0.9600 . ?
 C4 H4A 0.9600 . ?
 C4 H4B 0.9600 . ?
 C4 H4C 0.9600 . ?
 C5 H5A 0.9600 . ?
 C5 H5B 0.9600 . ?
 C5 H5C 0.9600 . ?
 C6 H6A 0.9600 . ?
 C6 H6B 0.9600 . ?
 C6 H6C 0.9600 . ?
 C7 H7A 0.9600 . ?
 C7 H7B 0.9600 . ?
 C7 H7C 0.9600 . ?
 C8 H8A 0.9600 . ?
 C8 H8B 0.9600 . ?
 C8 H8C 0.9600 . ?
 N1B C1B 1.531(13) . ?
 N1B C3B 1.484(13) . ?
 N1B C4B 1.499(13) . ?
 N1B C5B 1.517(15) . ?
 N2B C2B 1.513(9) . ?
 N2B C6B 1.487(11) . ?
 N2B C7B 1.492(12) . ?
 N2B C8B 1.464(13) . ?
 C1B H1BA 0.9700 . ?
 C1B H1BB 0.9700 . ?
 C1B C2B 1.518(10) . ?
 C2B H2BA 0.9700 . ?
 C2B H2BB 0.9700 . ?
 C3B H3BA 0.9600 . ?
 C3B H3BB 0.9600 . ?
 C3B H3BC 0.9600 . ?
 C4B H4BA 0.9600 . ?
 C4B H4BB 0.9600 . ?
 C4B H4BC 0.9600 . ?
 C5B H5BA 0.9600 . ?
 C5B H5BB 0.9600 . ?
 C5B H5BC 0.9600 . ?
 C6B H6BA 0.9600 . ?
 C6B H6BB 0.9600 . ?
 C6B H6BC 0.9600 . ?
 C7B H7BA 0.9600 . ?
 C7B H7BB 0.9600 . ?
 C7B H7BC 0.9600 . ?
 C8B H8BA 0.9600 . ?
 C8B H8BB 0.9600 . ?
 C8B H8BC 0.9600 . ?
 N1C C1C 1.514(17) . ?
 N1C C3C 1.517(18) . ?
 N1C C4C 1.501(18) . ?
 N1C C5C 1.488(17) . ?
 N2C C2C 1.510(10) . ?
 N2C C6C 1.452(12) . ?
 N2C C7C 1.500(14) . ?
 N2C C8C 1.523(14) . ?
 C1C H1CA 0.9700 . ?
 C1C H1CB 0.9700 . ?
 C1C C2C 1.523(10) . ?
 C2C H2CA 0.9700 . ?
 C2C H2CB 0.9700 . ?
 C3C H3CA 0.9600 . ?
 C3C H3CB 0.9600 . ?
 C3C H3CC 0.9600 . ?
 C4C H4CA 0.9600 . ?
 C4C H4CB 0.9600 . ?
 C4C H4CC 0.9600 . ?
 C5C H5CA 0.9600 . ?
 C5C H5CB 0.9600 . ?
 C5C H5CC 0.9600 . ?
 C6C H6CA 0.9600 . ?
 C6C H6CB 0.9600 . ?
 C6C H6CC 0.9600 . ?
 C7C H7CA 0.9600 . ?
 C7C H7CB 0.9600 . ?
 C7C H7CC 0.9600 . ?
 C8C H8CA 0.9600 . ?
 C8C H8CB 0.9600 . ?
 C8C H8CC 0.9600 . ?
 B21A O21A 1.35(2) . ?
 B21A O22A 1.37(3) . ?
 B21A O23A 1.338(19) . ?
 O21A H21A 0.8200 . ?
 O22A H22A 0.8200 . ?
 O23A H23A 0.8200 . ?

loop_
  _geom_angle_atom_site_label_1
  _geom_angle_atom_site_label_2
  _geom_angle_atom_site_label_3
  _geom_angle
  _geom_angle_site_symmetry_1
  _geom_angle_site_symmetry_3
  _geom_angle_publ_flag
 B1 O1 B2 110.13(14) . . ?
 B3 O2 B1 119.97(15) . . ?
 B3 O3 B2 118.56(15) . . ?
 B4 O4 B2 119.50(15) . . ?
 B4 O5 B1 117.36(14) . . ?
 B1 O6 H6 109.5 . . ?
 B2 O7 H7 109.5 . . ?
 B3 O8 H8 109.5 . . ?
 B4 O9 H9 109.5 . . ?
 B11 O11 H11 109.5 . . ?
 B11 O12 H12 109.5 . . ?
 B11 O13 H13 109.5 . . ?
 B21 O21 H21 109.5 . . ?
 B21 O22 H22 109.5 . . ?
 B21 O23 H23 109.5 . . ?
 H32A O32 H32B 109.4 . . ?
 O1 B1 O2 109.19(14) . . ?
 O1 B1 O5 107.86(15) . . ?
 O2 B1 O5 110.27(14) . . ?
 O6 B1 O1 113.11(15) . . ?
 O6 B1 O2 106.71(15) . . ?
 O6 B1 O5 109.70(15) . . ?
 O1 B2 O3 108.82(15) . . ?
 O4 B2 O1 108.93(14) . . ?
 O4 B2 O3 110.74(15) . . ?
 O7 B2 O1 111.43(15) . . ?
 O7 B2 O3 106.79(14) . . ?
 O7 B2 O4 110.11(15) . . ?
 O3 B3 O2 121.85(18) . . ?
 O3 B3 O8 117.16(17) . . ?
 O8 B3 O2 120.99(18) . . ?
 O4 B4 O5 122.88(17) . . ?
 O4 B4 O9 116.32(17) . . ?
 O5 B4 O9 120.76(17) . . ?
 O11 B11 O12 119.23(17) . . ?
 O13 B11 O11 124.25(17) . . ?
 O13 B11 O12 116.52(18) . . ?
 O22 B21 O21 120.7(7) . . ?
 O22 B21 O23 123.8(7) . . ?
 O23 B21 O21 115.4(4) . . ?
 H31A O31 H31B 109.5 . . ?
 C1 N1 C4 106.8(6) . . ?
 C1 N1 C5 110.6(6) . . ?
 C3 N1 C1 112.0(6) . . ?
 C3 N1 C4 110.9(6) . . ?
 C3 N1 C5 109.0(8) . . ?
 C5 N1 C4 107.4(7) . . ?
 C2 N2 C7 116.8(6) . . ?
 C6 N2 C2 109.4(4) . . ?
 C6 N2 C7 98.7(6) . . ?
 C6 N2 C8 109.9(5) . . ?
 C8 N2 C2 106.6(5) . . ?
 C8 N2 C7 115.2(7) . . ?
 N1 C1 H1A 109.4 . . ?
 N1 C1 H1B 109.4 . . ?
 N1 C1 C2 111.3(5) . . ?
 H1A C1 H1B 108.0 . . ?
 C2 C1 H1A 109.4 . . ?
 C2 C1 H1B 109.4 . . ?
 N2 C2 C1 113.9(4) . . ?
 N2 C2 H2A 108.8 . . ?
 N2 C2 H2B 108.8 . . ?
 C1 C2 H2A 108.8 . . ?
 C1 C2 H2B 108.8 . . ?
 H2A C2 H2B 107.7 . . ?
 N1 C3 H3A 109.5 . . ?
 N1 C3 H3B 109.5 . . ?
 N1 C3 H3C 109.5 . . ?
 H3A C3 H3B 109.5 . . ?
 H3A C3 H3C 109.5 . . ?
 H3B C3 H3C 109.5 . . ?
 N1 C4 H4A 109.5 . . ?
 N1 C4 H4B 109.5 . . ?
 N1 C4 H4C 109.5 . . ?
 H4A C4 H4B 109.5 . . ?
 H4A C4 H4C 109.5 . . ?
 H4B C4 H4C 109.5 . . ?
 N1 C5 H5A 109.5 . . ?
 N1 C5 H5B 109.5 . . ?
 N1 C5 H5C 109.5 . . ?
 H5A C5 H5B 109.5 . . ?
 H5A C5 H5C 109.5 . . ?
 H5B C5 H5C 109.5 . . ?
 N2 C6 H6A 109.5 . . ?
 N2 C6 H6B 109.5 . . ?
 N2 C6 H6C 109.5 . . ?
 H6A C6 H6B 109.5 . . ?
 H6A C6 H6C 109.5 . . ?
 H6B C6 H6C 109.5 . . ?
 N2 C7 H7A 109.5 . . ?
 N2 C7 H7B 109.5 . . ?
 N2 C7 H7C 109.5 . . ?
 H7A C7 H7B 109.5 . . ?
 H7A C7 H7C 109.5 . . ?
 H7B C7 H7C 109.5 . . ?
 N2 C8 H8A 109.5 . . ?
 N2 C8 H8B 109.5 . . ?
 N2 C8 H8C 109.5 . . ?
 H8A C8 H8B 109.5 . . ?
 H8A C8 H8C 109.5 . . ?
 H8B C8 H8C 109.5 . . ?
 C3B N1B C1B 106.5(9) . . ?
 C3B N1B C4B 111.1(10) . . ?
 C3B N1B C5B 106.9(12) . . ?
 C4B N1B C1B 109.6(9) . . ?
 C4B N1B C5B 110.1(12) . . ?
 C5B N1B C1B 112.6(12) . . ?
 C6B N2B C2B 110.9(7) . . ?
 C6B N2B C7B 108.8(8) . . ?
 C7B N2B C2B 106.4(7) . . ?
 C8B N2B C2B 110.2(9) . . ?
 C8B N2B C6B 110.8(9) . . ?
 C8B N2B C7B 109.6(10) . . ?
 N1B C1B H1BA 109.3 . . ?
 N1B C1B H1BB 109.3 . . ?
 H1BA C1B H1BB 108.0 . . ?
 C2B C1B N1B 111.5(7) . . ?
 C2B C1B H1BA 109.3 . . ?
 C2B C1B H1BB 109.3 . . ?
 N2B C2B C1B 113.0(6) . . ?
 N2B C2B H2BA 109.0 . . ?
 N2B C2B H2BB 109.0 . . ?
 C1B C2B H2BA 109.0 . . ?
 C1B C2B H2BB 109.0 . . ?
 H2BA C2B H2BB 107.8 . . ?
 N1B C3B H3BA 109.5 . . ?
 N1B C3B H3BB 109.5 . . ?
 N1B C3B H3BC 109.5 . . ?
 H3BA C3B H3BB 109.5 . . ?
 H3BA C3B H3BC 109.5 . . ?
 H3BB C3B H3BC 109.5 . . ?
 N1B C4B H4BA 109.5 . . ?
 N1B C4B H4BB 109.5 . . ?
 N1B C4B H4BC 109.5 . . ?
 H4BA C4B H4BB 109.5 . . ?
 H4BA C4B H4BC 109.5 . . ?
 H4BB C4B H4BC 109.5 . . ?
 N1B C5B H5BA 109.5 . . ?
 N1B C5B H5BB 109.5 . . ?
 N1B C5B H5BC 109.5 . . ?
 H5BA C5B H5BB 109.5 . . ?
 H5BA C5B H5BC 109.5 . . ?
 H5BB C5B H5BC 109.5 . . ?
 N2B C6B H6BA 109.5 . . ?
 N2B C6B H6BB 109.5 . . ?
 N2B C6B H6BC 109.5 . . ?
 H6BA C6B H6BB 109.5 . . ?
 H6BA C6B H6BC 109.5 . . ?
 H6BB C6B H6BC 109.5 . . ?
 N2B C7B H7BA 109.5 . . ?
 N2B C7B H7BB 109.5 . . ?
 N2B C7B H7BC 109.5 . . ?
 H7BA C7B H7BB 109.5 . . ?
 H7BA C7B H7BC 109.5 . . ?
 H7BB C7B H7BC 109.5 . . ?
 N2B C8B H8BA 109.5 . . ?
 N2B C8B H8BB 109.5 . . ?
 N2B C8B H8BC 109.5 . . ?
 H8BA C8B H8BB 109.5 . . ?
 H8BA C8B H8BC 109.5 . . ?
 H8BB C8B H8BC 109.5 . . ?
 C1C N1C C3C 115.3(14) . . ?
 C4C N1C C1C 110.9(14) . . ?
 C4C N1C C3C 102.0(15) . . ?
 C5C N1C C1C 107.9(13) . . ?
 C5C N1C C3C 113.3(14) . . ?
 C5C N1C C4C 107.2(15) . . ?
 C2C N2C C8C 112.7(9) . . ?
 C6C N2C C2C 105.5(8) . . ?
 C6C N2C C7C 126.9(10) . . ?
 C6C N2C C8C 109.6(9) . . ?
 C7C N2C C2C 109.9(9) . . ?
 C7C N2C C8C 91.7(9) . . ?
 N1C C1C H1CA 109.3 . . ?
 N1C C1C H1CB 109.3 . . ?
 N1C C1C C2C 111.6(9) . . ?
 H1CA C1C H1CB 108.0 . . ?
 C2C C1C H1CA 109.3 . . ?
 C2C C1C H1CB 109.3 . . ?
 N2C C2C C1C 112.1(7) . . ?
 N2C C2C H2CA 109.2 . . ?
 N2C C2C H2CB 109.2 . . ?
 C1C C2C H2CA 109.2 . . ?
 C1C C2C H2CB 109.2 . . ?
 H2CA C2C H2CB 107.9 . . ?
 N1C C3C H3CA 109.5 . . ?
 N1C C3C H3CB 109.5 . . ?
 N1C C3C H3CC 109.5 . . ?
 H3CA C3C H3CB 109.5 . . ?
 H3CA C3C H3CC 109.5 . . ?
 H3CB C3C H3CC 109.5 . . ?
 N1C C4C H4CA 109.5 . . ?
 N1C C4C H4CB 109.5 . . ?
 N1C C4C H4CC 109.5 . . ?
 H4CA C4C H4CB 109.5 . . ?
 H4CA C4C H4CC 109.5 . . ?
 H4CB C4C H4CC 109.5 . . ?
 N1C C5C H5CA 109.5 . . ?
 N1C C5C H5CB 109.5 . . ?
 N1C C5C H5CC 109.5 . . ?
 H5CA C5C H5CB 109.5 . . ?
 H5CA C5C H5CC 109.5 . . ?
 H5CB C5C H5CC 109.5 . . ?
 N2C C6C H6CA 109.5 . . ?
 N2C C6C H6CB 109.5 . . ?
 N2C C6C H6CC 109.5 . . ?
 H6CA C6C H6CB 109.5 . . ?
 H6CA C6C H6CC 109.5 . . ?
 H6CB C6C H6CC 109.5 . . ?
 N2C C7C H7CA 109.5 . . ?
 N2C C7C H7CB 109.5 . . ?
 N2C C7C H7CC 109.5 . . ?
 H7CA C7C H7CB 109.5 . . ?
 H7CA C7C H7CC 109.5 . . ?
 H7CB C7C H7CC 109.5 . . ?
 N2C C8C H8CA 109.5 . . ?
 N2C C8C H8CB 109.5 . . ?
 N2C C8C H8CC 109.5 . . ?
 H8CA C8C H8CB 109.5 . . ?
 H8CA C8C H8CC 109.5 . . ?
 H8CB C8C H8CC 109.5 . . ?
 O21A B21A O22A 117(2) . . ?
 O23A B21A O21A 119.5(14) . . ?
 O23A B21A O22A 123(2) . . ?
 B21A O21A H21A 109.5 . . ?
 B21A O22A H22A 109.5 . . ?
 B21A O23A H23A 109.5 . . ?

loop_
  _geom_hbond_atom_site_label_D
  _geom_hbond_atom_site_label_H
  _geom_hbond_atom_site_label_A
  _geom_hbond_distance_DH
  _geom_hbond_distance_HA
  _geom_hbond_distance_DA
  _geom_hbond_angle_DHA
  _geom_hbond_site_symmetry_A
  _geom_hbond_publ_flag
 O6 H6 O22 0.82 1.94 2.751(14) 169.5 . yes
 O6 H6 O22A 0.82 2.02 2.82(4) 166.8 . yes
 O7 H7 O32 0.82 1.92 2.738(2) 178.0 1_554 yes
 O8 H8 O12 0.82 2.05 2.815(2) 155.2 2_546 yes
 O9 H9 O11 0.82 1.87 2.6909(19) 174.7 1_655 yes
 O11 H11 O7 0.82 1.80 2.6020(18) 165.7 . yes
 O12 H12 O5 0.82 1.98 2.7958(18) 174.9 1_455 yes
 O13 H13 O1 0.82 1.83 2.6427(19) 170.9 . yes
 O21 H21 O1 0.82 1.87 2.662(4) 161.2 . yes
 O22 H22 O2 0.82 1.81 2.622(14) 169.5 2_656 yes
 O23 H23 O6 0.82 1.83 2.629(3) 164.1 2_656 yes
 O32 H32A O3 0.85 1.95 2.790(2) 171.8 2_556 yes
 O32 H32B O21 0.85 2.18 2.899(4) 142.3 1_556 yes
 O32 H32B O21A 0.85 2.06 2.822(11) 149.0 1_556 yes
 O31 H31A O7 0.85 1.95 2.779(2) 163.2 1_656 yes
 O31 H31B O23 0.85 1.94 2.780(5) 167.8 2_646 yes
 O31 H31B O23A 0.85 1.72 2.479(14) 148.0 2_646 yes
 O21A H21A O1 0.82 2.00 2.801(14) 166.3 . yes
 O22A H22A O2 0.82 1.89 2.68(4) 161.2 2_656 yes
 O23A H23A O6 0.82 2.00 2.733(13) 147.9 2_656 yes

loop_
  _geom_torsion_atom_site_label_1
  _geom_torsion_atom_site_label_2
  _geom_torsion_atom_site_label_3
  _geom_torsion_atom_site_label_4
  _geom_torsion
  _geom_torsion_site_symmetry_1
  _geom_torsion_site_symmetry_2
  _geom_torsion_site_symmetry_3
  _geom_torsion_site_symmetry_4
  _geom_torsion_publ_flag
 B1 O1 B2 O3 62.12(17) . . . . ?
 B1 O1 B2 O4 -58.71(18) . . . . ?
 B1 O1 B2 O7 179.61(14) . . . . ?
 B1 O2 B3 O3 8.3(3) . . . . ?
 B1 O2 B3 O8 -171.69(17) . . . . ?
 B1 O5 B4 O4 -7.1(3) . . . . ?
 B1 O5 B4 O9 175.42(18) . . . . ?
 B2 O1 B1 O2 -56.83(18) . . . . ?
 B2 O1 B1 O5 63.01(18) . . . . ?
 B2 O1 B1 O6 -175.48(14) . . . . ?
 B2 O3 B3 O2 -3.0(3) . . . . ?
 B2 O3 B3 O8 177.02(16) . . . . ?
 B2 O4 B4 O5 12.0(3) . . . . ?
 B2 O4 B4 O9 -170.44(17) . . . . ?
 B3 O2 B1 O1 21.9(2) . . . . ?
 B3 O2 B1 O5 -96.42(18) . . . . ?
 B3 O2 B1 O6 144.50(16) . . . . ?
 B3 O3 B2 O1 -31.7(2) . . . . ?
 B3 O3 B2 O4 88.0(2) . . . . ?
 B3 O3 B2 O7 -152.10(15) . . . . ?
 B4 O4 B2 O1 20.9(2) . . . . ?
 B4 O4 B2 O3 -98.7(2) . . . . ?
 B4 O4 B2 O7 143.42(17) . . . . ?
 B4 O5 B1 O1 -29.9(2) . . . . ?
 B4 O5 B1 O2 89.26(19) . . . . ?
 B4 O5 B1 O6 -153.49(16) . . . . ?
 N1 C1 C2 N2 162.7(5) . . . . ?
 C3 N1 C1 C2 54.6(7) . . . . ?
 C4 N1 C1 C2 176.1(5) . . . . ?
 C5 N1 C1 C2 -67.2(8) . . . . ?
 C6 N2 C2 C1 57.9(6) . . . . ?
 C7 N2 C2 C1 -53.0(8) . . . . ?
 C8 N2 C2 C1 176.6(5) . . . . ?
 N1B C1B C2B N2B 165.1(7) . . . . ?
 C3B N1B C1B C2B 165.9(8) . . . . ?
 C4B N1B C1B C2B -73.8(10) . . . . ?
 C5B N1B C1B C2B 49.1(14) . . . . ?
 C6B N2B C2B C1B -69.0(9) . . . . ?
 C7B N2B C2B C1B 172.8(7) . . . . ?
 C8B N2B C2B C1B 54.1(11) . . . . ?
 N1C C1C C2C N2C 166.5(11) . . . . ?
 C3C N1C C1C C2C -48.9(17) . . . . ?
 C4C N1C C1C C2C 66.3(16) . . . . ?
 C5C N1C C1C C2C -176.6(11) . . . . ?
 C6C N2C C2C C1C 173.0(8) . . . . ?
 C7C N2C C2C C1C 33.2(11) . . . . ?
 C8C N2C C2C C1C -67.5(11) . . . . ?

_shelx_res_file
;
TITL 2017ncs0329_5b_a.res in P2(1)
    2017ncs0329_5b.res
    created by SHELXL-2018/3 at 15:10:31 on 26-Nov-2019
REM Old TITL 2017ncs0329_5b in P2(1)
REM SHELXT solution in P2(1): R1 0.129, Rweak 0.040, Alpha 0.008
REM <I/s> 0.660 for 8 systematic absences, Orientation as input
REM Flack x = -0.299 ( 0.246 ) from 1988 Parsons' quotients
REM Formula found by SHELXT: C14 B2 N O16
CELL 0.71075 9.0242 12.035 11.1688 90 109.811 90
ZERR 2 0.0002 0.0003 0.0004 0 0.003 0
LATT -1
SYMM -X,0.5+Y,-Z
SFAC C H B N O
UNIT 16 72 12 4 34
EQIV $1 +X,+Y,-1+Z
EQIV $2 -X,-0.5+Y,1-Z
EQIV $3 1+X,+Y,+Z
EQIV $4 -1+X,+Y,+Z
EQIV $5 1-X,0.5+Y,1-Z
EQIV $6 -X,0.5+Y,1-Z
EQIV $7 +X,+Y,1+Z
EQIV $8 1+X,+Y,1+Z
EQIV $9 1-X,-0.5+Y,1-Z
DFIX 2 0.03 O6_$5 H23A
SIMU 0.02 0.04 2
RIGU 0.002 0.002
EADP B21 B21A
SUMP 1 0.0001 1 2 1 3 1 4

L.S. 10
PLAN  10
SIZE 0.025 0.08 0.13
HTAB O6 O22
HTAB O6 O22A
HTAB O7 O32_$1
HTAB O8 O12_$2
HTAB O9 O11_$3
HTAB O11 O7
HTAB O12 O5_$4
HTAB O13 O1
HTAB O21 O1
HTAB O22 O2_$5
HTAB O23 O6_$5
HTAB O32 O3_$6
HTAB O32 O21_$7
HTAB O32 O21A_$7
HTAB O31 O7_$8
HTAB O31 O23_$9
HTAB O31 O23A_$9
HTAB O21A O1
HTAB O22A O2_$5
HTAB O23A O6_$5
CONF
HTAB
BOND $H
MORE -1
fmap 2
acta
MERG 2
REM <olex2.extras>
REM <HklSrc "%.\\2017ncs0329_5b.hkl">
REM </olex2.extras>

WGHT    0.053600    0.060100
FVAR       1.04875   0.47385   0.28687   0.23928   0.76299
O1    5    0.182203    0.755612    0.304370    11.00000    0.00897    0.01151 =
         0.01361   -0.00104    0.00288    0.00131
O2    5    0.302500    0.582200    0.395454    11.00000    0.01226    0.01110 =
         0.01343    0.00107    0.00097   -0.00084
O3    5    0.075391    0.581444    0.206767    11.00000    0.01304    0.01283 =
         0.01635    0.00039   -0.00052   -0.00137
O4    5    0.221105    0.701404    0.110595    11.00000    0.01029    0.01836 =
         0.01349   -0.00231    0.00221    0.00044
O5    5    0.441797    0.714402    0.304164    11.00000    0.00924    0.01358 =
         0.01456    0.00084    0.00216    0.00026
O6    5    0.402336    0.748962    0.503282    11.00000    0.01315    0.01084 =
         0.01497   -0.00164    0.00121   -0.00069
AFIX 147
H6    2    0.429172    0.813225    0.497251    11.00000   -1.50000
AFIX   0
O7    5   -0.038949    0.748860    0.106804    11.00000    0.00975    0.01540 =
         0.01460    0.00231    0.00181    0.00101
AFIX 147
H7    2   -0.022105    0.807207    0.075732    11.00000   -1.50000
AFIX   0
O8    5    0.131534    0.425027    0.337247    11.00000    0.01986    0.01639 =
         0.01789    0.00425   -0.00153   -0.00518
AFIX 147
H8    2    0.190978    0.404405    0.406954    11.00000   -1.50000
AFIX   0
O9    5    0.469175    0.737877    0.100665    11.00000    0.01080    0.04301 =
         0.01494    0.00114    0.00343    0.00036
AFIX 147
H9    2    0.561457    0.743734    0.146662    11.00000   -1.50000
AFIX   0
O11   5   -0.224954    0.765406    0.240169    11.00000    0.01063    0.03160 =
         0.01775   -0.00169    0.00569   -0.00078
AFIX 147
H11   2   -0.154553    0.763868    0.209212    11.00000   -1.50000
AFIX   0
O12   5   -0.261923    0.804679    0.435050    11.00000    0.01194    0.03004 =
         0.02027   -0.00969    0.00556   -0.00380
AFIX 147
H12   2   -0.349631    0.781359    0.393322    11.00000   -1.50000
AFIX   0
O13   5   -0.008829    0.816576    0.426940    11.00000    0.01343    0.03311 =
         0.02172   -0.01083    0.00651   -0.00223
AFIX 147
H13   2    0.042335    0.798757    0.381714    11.00000   -1.50000
AFIX   0

PART 1
O21   5    0.241436    0.966672    0.265442    51.00000    0.02759    0.01489 =
         0.02026    0.00395   -0.00532   -0.00575
AFIX 147
H21   2    0.227388    0.906443    0.294218    51.00000   -1.50000
AFIX   0
O22   5    0.453591    0.968661    0.461690    51.00000    0.01732    0.01480 =
         0.01824    0.00004   -0.00677   -0.00564
AFIX 147
H22   2    0.522510    1.011024    0.504265    51.00000   -1.50000
AFIX   0
O23   5    0.384741    1.129306    0.326241    51.00000    0.03730    0.01722 =
         0.01524    0.00114   -0.00551   -0.01107
AFIX 147
H23   2    0.460549    1.155373    0.382786    51.00000   -1.50000
AFIX   6

PART 0
O32   5    0.019467    0.945978    1.008681    11.00000    0.03668    0.02372 =
         0.02216    0.00975   -0.00889   -0.01145
H32A  2   -0.015085    0.990767    0.946451    11.00000   -1.50000
H32B  2    0.100965    0.973499    1.063761    11.00000   -1.50000
AFIX   0

B1    3    0.331496    0.702247    0.377693    11.00000    0.00961    0.01062 =
         0.01350   -0.00008    0.00242    0.00106
B2    3    0.110508    0.698097    0.181680    11.00000    0.00967    0.01115 =
         0.01376    0.00033    0.00140    0.00026
B3    3    0.171203    0.530559    0.313766    11.00000    0.01206    0.01398 =
         0.01411   -0.00075    0.00269   -0.00102
B4    3    0.376769    0.719014    0.174158    11.00000    0.01234    0.01402 =
         0.01420    0.00049    0.00372    0.00210
B11   3   -0.163553    0.794973    0.365078    11.00000    0.01362    0.01329 =
         0.01759   -0.00164    0.00463    0.00099
PART 1
B21   3    0.364737    1.020637    0.353385    51.00000    0.02076    0.01544 =
         0.01535   -0.00061    0.00221   -0.00302

PART 0
AFIX   6
O31   5    0.687528    0.660406    0.934023    11.00000    0.03836    0.07913 =
         0.03257   -0.00608    0.00958   -0.01998
H31A  2    0.780216    0.681400    0.976984    11.00000   -1.50000
H31B  2    0.678830    0.654948    0.856044    11.00000   -1.50000
AFIX   0

PART 1
N1    4    0.166833    0.636271    0.772592    21.00000    0.01796    0.01002 =
         0.01991   -0.00646    0.00295   -0.00985
N2    4    0.338071    0.926716    0.764634    21.00000    0.00778    0.01608 =
         0.01429   -0.00580   -0.00064   -0.00196
C1    1    0.292959    0.724377    0.804380    21.00000    0.01574    0.01924 =
         0.02277   -0.00152    0.00265   -0.00620
AFIX  23
H1A   2    0.388800    0.693210    0.797353    21.00000   -1.20000
H1B   2    0.315395    0.748580    0.891590    21.00000   -1.20000
AFIX   0
C2    1    0.242308    0.823490    0.715988    21.00000    0.01821    0.01418 =
         0.01774   -0.00356    0.00382   -0.00470
AFIX  23
H2A   2    0.250286    0.804079    0.634099    21.00000   -1.20000
H2B   2    0.132575    0.839533    0.702847    21.00000   -1.20000
AFIX   0
C3    1    0.117779    0.601681    0.635744    21.00000    0.01292    0.04052 =
         0.01936   -0.00426    0.00371   -0.00859
AFIX 137
H3A   2    0.064777    0.662297    0.582521    21.00000   -1.50000
H3B   2    0.047893    0.539162    0.621847    21.00000   -1.50000
H3C   2    0.209250    0.581429    0.615218    21.00000   -1.50000
AFIX   0
C4    1    0.233699    0.538723    0.859811    21.00000    0.04000    0.02035 =
         0.03076    0.00665    0.01223    0.00187
AFIX 137
H4A   2    0.323003    0.509277    0.842161    21.00000   -1.50000
H4B   2    0.154679    0.482106    0.845789    21.00000   -1.50000
H4C   2    0.265807    0.562941    0.946778    21.00000   -1.50000
AFIX   0
C5    1    0.023831    0.677097    0.800984    21.00000    0.02113    0.01902 =
         0.02640    0.00339    0.00848   -0.00642
AFIX 137
H5A   2    0.056921    0.714510    0.881670    21.00000   -1.50000
H5B   2   -0.041725    0.615026    0.803797    21.00000   -1.50000
H5C   2   -0.034527    0.727683    0.735518    21.00000   -1.50000
AFIX   0
C6    1    0.506850    0.902990    0.786514    21.00000    0.01237    0.02534 =
         0.02334   -0.00940   -0.00266   -0.00506
AFIX 137
H6A   2    0.548320    0.856413    0.860122    21.00000   -1.50000
H6B   2    0.564710    0.971489    0.800036    21.00000   -1.50000
H6C   2    0.516542    0.865743    0.713518    21.00000   -1.50000
AFIX   0
C7    1    0.353533    0.965974    0.902329    21.00000    0.09277    0.04271 =
         0.04988   -0.02188    0.05033   -0.00953
AFIX 137
H7A   2    0.250478    0.974331    0.908315    21.00000   -1.50000
H7B   2    0.407801    1.035911    0.919832    21.00000   -1.50000
H7C   2    0.411778    0.911698    0.963080    21.00000   -1.50000
AFIX   0
C8    1    0.279262    1.012494    0.663484    21.00000    0.02444    0.01644 =
         0.03869    0.00431    0.00787    0.00129
AFIX 137
H8A   2    0.283979    0.983979    0.584582    21.00000   -1.50000
H8B   2    0.343616    1.077852    0.687019    21.00000   -1.50000
H8C   2    0.172276    1.030952    0.653639    21.00000   -1.50000
AFIX   0
SAME 0.02 0.04 N1 > C8
PART 0
PART 2
N1B   4    0.129897    0.648580    0.740994    31.00000    0.02763
N2B   4    0.342992    0.931760    0.817562    31.00000    0.01482
C1B   1    0.199379    0.757861    0.713796    31.00000    0.01917
AFIX  23
H1BA  2    0.294762    0.742412    0.695099    31.00000   -1.20000
H1BB  2    0.124771    0.792910    0.639515    31.00000   -1.20000
AFIX   0
C2B   1    0.237133    0.836823    0.826130    31.00000    0.01777
AFIX  23
H2BA  2    0.139568    0.866945    0.830858    31.00000   -1.20000
H2BB  2    0.288015    0.795602    0.903889    31.00000   -1.20000
AFIX   0
C3B   1    0.061066    0.591249    0.616842    31.00000    0.02458
AFIX 137
H3BA  2   -0.020010    0.636821    0.560315    31.00000   -1.50000
H3BB  2    0.016792    0.521512    0.629386    31.00000   -1.50000
H3BC  2    0.141873    0.578314    0.580485    31.00000   -1.50000
AFIX   0
C4B   1    0.257549    0.580078    0.832056    31.00000    0.03000
AFIX 137
H4BA  2    0.341989    0.570395    0.798973    31.00000   -1.50000
H4BB  2    0.216019    0.508757    0.842712    31.00000   -1.50000
H4BC  2    0.296393    0.617209    0.912802    31.00000   -1.50000
AFIX   0
C5B   1   -0.003053    0.666652    0.793208    31.00000    0.02248
AFIX 137
H5BA  2    0.040120    0.682725    0.882561    31.00000   -1.50000
H5BB  2   -0.066499    0.600758    0.780346    31.00000   -1.50000
H5BC  2   -0.066918    0.727911    0.749759    31.00000   -1.50000
AFIX   0
C6B   1    0.504266    0.891101    0.833840    31.00000    0.02760
AFIX 137
H6BA  2    0.543239    0.848180    0.910629    31.00000   -1.50000
H6BB  2    0.572659    0.953352    0.838949    31.00000   -1.50000
H6BC  2    0.501015    0.845523    0.762453    31.00000   -1.50000
AFIX   0
C7B   1    0.351800    1.008866    0.924328    31.00000    0.02701
AFIX 137
H7BA  2    0.250308    1.041759    0.909934    31.00000   -1.50000
H7BB  2    0.427435    1.066218    0.928815    31.00000   -1.50000
H7BC  2    0.383327    0.968244    1.002944    31.00000   -1.50000
AFIX   0
C8B   1    0.275078    0.989994    0.696129    31.00000    0.02706
AFIX 137
H8BA  2    0.288744    0.945795    0.629077    31.00000   -1.50000
H8BB  2    0.327163    1.060152    0.700129    31.00000   -1.50000
H8BC  2    0.164788    1.002227    0.679543    31.00000   -1.50000
AFIX   0
SAME 0.02 0.04 N1 > C8
PART 0
PART 3
N1C   4    0.142411    0.645825    0.760766    41.00000    0.02260
N2C   4    0.390502    0.911515    0.797033    41.00000    0.01044
C1C   1    0.192240    0.764679    0.797724    41.00000    0.02023
AFIX  23
H1CA  2    0.193231    0.778228    0.883606    41.00000   -1.20000
H1CB  2    0.116247    0.814813    0.741037    41.00000   -1.20000
AFIX   0
C2C   1    0.354976    0.788584    0.791058    41.00000    0.01601
AFIX  23
H2CA  2    0.433761    0.751491    0.861197    41.00000   -1.20000
H2CB  2    0.361419    0.758504    0.712398    41.00000   -1.20000
AFIX   0
C3C   1    0.162334    0.606394    0.638127    41.00000    0.02844
AFIX 137
H3CA  2    0.117046    0.659955    0.572135    41.00000   -1.50000
H3CB  2    0.110163    0.536235    0.613852    41.00000   -1.50000
H3CC  2    0.272404    0.598036    0.650773    41.00000   -1.50000
AFIX   0
C4C   1    0.245181    0.565955    0.856374    41.00000    0.01456
AFIX 137
H4CA  2    0.349113    0.566361    0.850983    41.00000   -1.50000
H4CB  2    0.201631    0.492521    0.838913    41.00000   -1.50000
H4CC  2    0.250526    0.587901    0.940375    41.00000   -1.50000
AFIX   0
C5C   1   -0.020748    0.631823    0.762213    41.00000    0.04371
AFIX 137
H5CA  2   -0.022376    0.646328    0.846279    41.00000   -1.50000
H5CB  2   -0.055509    0.557145    0.738050    41.00000   -1.50000
H5CC  2   -0.089659    0.682958    0.703245    41.00000   -1.50000
AFIX   0
C6C   1    0.554449    0.919844    0.805971    41.00000    0.01451
AFIX 137
H6CA  2    0.618349    0.876114    0.876462    41.00000   -1.50000
H6CB  2    0.587370    0.996081    0.818625    41.00000   -1.50000
H6CC  2    0.566011    0.892843    0.728737    41.00000   -1.50000
AFIX   0
C7C   1    0.313339    0.968621    0.879929    41.00000    0.01309
AFIX 137
H7CA  2    0.200986    0.963091    0.841531    41.00000   -1.50000
H7CB  2    0.343557    1.045483    0.889164    41.00000   -1.50000
H7CC  2    0.346107    0.933828    0.962127    41.00000   -1.50000
AFIX   0
C8C   1    0.287520    0.973823    0.679600    41.00000    0.02061
AFIX 137
H8CA  2    0.276061    0.930255    0.604991    41.00000   -1.50000
H8CB  2    0.335879    1.043635    0.673406    41.00000   -1.50000
H8CC  2    0.185714    0.986852    0.686389    41.00000   -1.50000
AFIX   0

PART 0
PART 2
B21A  3    0.390470    1.018138    0.325291   -51.00000    0.02076    0.01544 =
         0.01535   -0.00061    0.00221   -0.00302
O21A  5    0.282066    0.958469    0.234944   -51.00000    0.01404    0.00909 =
         0.02235    0.00166   -0.00292    0.00233
AFIX 147
H21A  2    0.257569    0.903552    0.267500   -51.00000   -1.50000
AFIX   0
O22A  5    0.456539    0.969332    0.442364   -51.00000    0.01561    0.00925 =
         0.01700   -0.00174    0.00493   -0.00324
AFIX 147
H22A  2    0.540640    0.999676    0.480696   -51.00000   -1.50000
AFIX   0
O23A  5    0.434761    1.117534    0.295641   -51.00000    0.02316    0.01462 =
         0.02268    0.00201   -0.00428   -0.00507
AFIX 147
H23A  2    0.510986    1.139842    0.354660   -51.00000   -1.50000
AFIX   0
HKLF 4


REM  2017ncs0329_5b_a.res in P2(1)
REM wR2 = 0.0802, GooF = S = 1.059, Restrained GooF = 1.021 for all data
REM R1 = 0.0303 for 4895 Fo > 4sig(Fo) and 0.0337 for all 5229 data
REM 449 parameters refined using 974 restraints

END

WGHT      0.0536      0.0601

REM Instructions for potential hydrogen bonds
HTAB O6 O22
HTAB O6 O22A
HTAB O7 O32_$1
HTAB O8 O12_$2
HTAB O9 O11_$3
HTAB O11 O7
HTAB O12 O5_$4
HTAB O13 O1
HTAB O21 O1
HTAB O22 O2_$5
HTAB O23 O6_$5
HTAB C1 O31
HTAB C1 O9_$7
HTAB C2 O6
HTAB C2 O8_$6
HTAB C3 O13
EQIV $10 -x, y-1/2, -z+2
HTAB C4 O32_$10
HTAB C4 O4_$7
HTAB C5 O4_$7
HTAB C5 O21_$2
HTAB C5 O8_$6
HTAB C6 O6
EQIV $11 -x+1, y+1/2, -z+2
HTAB C7 O31_$11
HTAB C7 O9_$7
HTAB C8 O22
HTAB C8 O5_$5
HTAB C1B O6
HTAB C1B O13
HTAB C2B O8_$6
HTAB C2B O9_$7
HTAB C3B O13
HTAB C3B O13_$2
HTAB C4B O23A_$9
HTAB C4B O9_$7
HTAB C5B O4_$7
HTAB C5B O21A_$2
HTAB C5B O8_$6
HTAB C6B O31
HTAB C7B O9_$5
HTAB C1C O4_$7
HTAB C1C O8_$6
HTAB C2C O9_$7
HTAB C2C O31
HTAB C2C O6
HTAB C3C O13
HTAB C4C O4_$7
HTAB C7C O31_$11
HTAB O21A O1
HTAB O22A O2_$5
HTAB O23A O6_$5

REM Highest difference peak  0.201,  deepest hole -0.386,  1-sigma level  0.041
Q1    1   0.0971  0.6361  0.2009  11.00000  0.05    0.20
Q2    1   0.4051  0.7224  0.2467  11.00000  0.05    0.20
Q3    1   0.2492  0.7386  0.3406  11.00000  0.05    0.20
Q4    1   0.4045  0.7128  0.3351  11.00000  0.05    0.18
Q5    1   0.1844  0.6982  0.1543  11.00000  0.05    0.17
Q6    1   0.3193  0.6325  0.3949  11.00000  0.05    0.17
Q7    1   0.0971  0.9220  0.9927  11.00000  0.05    0.16
Q8    1   0.2030  0.9923  0.8744  11.00000  0.05    0.16
Q9    1   0.0387  0.5879  0.2083  11.00000  0.05    0.14
Q10   1   0.1612  0.7601  0.3234  11.00000  0.05    0.14
;
_shelx_res_checksum                54205
_shelx_hkl_file
;
   0 -15   0    0.95    5.45
   0 -15   0    7.70    6.71
   0 -15   0   -5.45    6.72
   0 -15  -1   55.98    7.42
   0 -15   1   53.16    7.84
   0 -15   1   46.83    8.94
   0 -15   1   49.39    8.54
   0 -15  -1   52.86    8.19
   0 -15  -1   58.93    8.88
   0 -15   2    8.31    7.71
   0 -15   2   10.87    6.09
   0 -15  -2    4.94    5.32
   0 -15  -2   16.99    7.70
   0 -15  -2    3.73    5.98
   0 -15   2    8.03    6.85
   0 -15   3    1.09    6.02
   0 -15   3   -8.74    8.28
   0 -15   3    1.69    7.00
   0 -15  -3   -1.37    6.43
   0 -15   3   -0.77    8.23
   0 -14   0   23.44    7.11
   0 -14   0   17.07    6.27
   0 -14   0   14.32    5.58
   0 -14  -1   12.74    6.88
   0 -14   1    4.81    6.36
   0 -14   1   12.42    7.09
   0 -14  -1   12.45    6.21
   0 -14   1   12.62    5.53
   0 -14  -1   14.73    5.77
   0 -14   2  128.95   11.94
   0 -14  -2  147.76   11.24
   0 -14  -2  139.07    9.46
   0 -14   2  149.44   10.84
   0 -14   2  148.42   10.97
   0 -14  -2  156.80   10.52
   0 -14   3   25.49    7.37
   0 -14  -3   47.36    6.61
   0 -14   3   37.74    7.44
   0 -14   3   33.76    8.91
   0 -14  -3   25.32    6.32
   0 -14  -4   32.14    6.34
   0 -14   4   25.09    7.01
   0 -14   4   31.88    8.07
   0 -14   4   26.46    8.58
   0 -14   4   32.64    9.48
   0 -14   5  241.29   16.34
   0 -14   5  276.69   15.69
   0 -14   5  244.96   14.81
   0 -14  -5  242.76   12.68
   0 -14   6    3.73    7.88
   0 -14   6   15.70    6.34
   0 -14   6   21.86    9.44
   0 -14  -6   22.19    6.39
   0 -13   0    1.50    6.22
   0 -13   0   -1.28    5.49
   0 -13   0   -0.39    4.55
   0 -13  -1   97.99    9.21
   0 -13   1   86.02    8.61
   0 -13   1   95.98    9.74
   0 -13  -1   94.26    8.38
   0 -13   1   93.01    8.15
   0 -13  -1  117.24    8.59
   0 -13   2   92.62    9.01
   0 -13  -2   79.53    7.34
   0 -13   2   81.19    8.16
   0 -13  -2   87.65    7.98
   0 -13   3   19.32    7.07
   0 -13  -3   14.21    5.42
   0 -13   3   17.63    6.21
   0 -13  -3   22.89    5.94
   0 -13  -4   40.03    6.58
   0 -13   4   41.39    7.02
   0 -13   4   33.20    7.71
   0 -13   4   46.84    5.18
   0 -13   4   37.42    8.70
   0 -13   5   72.77    9.29
   0 -13   5   64.62    8.80
   0 -13   5   72.38    6.07
   0 -13  -5   76.01    7.56
   0 -13   6   35.53    8.66
   0 -13  -6   52.81    6.11
   0 -13   6   47.83    7.34
   0 -13   6   33.98    4.69
   0 -13  -6   37.48    6.48
   0 -13  -7   26.47    5.92
   0 -13   7   22.38    5.44
   0 -13  -7   28.81    5.71
   0 -13   7   19.47    8.62
   0 -12   0   24.30    5.30
   0 -12   0   14.01    5.58
   0 -12   1   18.42    5.97
   0 -12  -1   14.12    5.43
   0 -12   1   24.46    5.00
   0 -12  -1   21.78    5.23
   0 -12   1   16.83    5.28
   0 -12  -2   17.98    5.39
   0 -12   2   21.44    5.60
   0 -12  -2   19.38    4.91
   0 -12   2   28.62    6.37
   0 -12  -3  163.21    9.68
   0 -12   3  177.45   11.45
   0 -12   3  149.04   10.05
   0 -12  -3  165.99    9.57
   0 -12   4   10.88    6.25
   0 -12  -4   14.11    4.83
   0 -12   4    7.21    5.72
   0 -12   4    7.49    6.98
   0 -12  -4   16.51    5.25
   0 -12   5    7.92    6.24
   0 -12  -5    6.04    3.90
   0 -12   5    6.01    5.83
   0 -12  -5    5.67    4.85
   0 -12   6  134.93   11.27
   0 -12  -6  112.55    7.50
   0 -12   6  116.34    8.92
   0 -12  -6  112.23    8.34
   0 -12   7  104.33   10.87
   0 -12  -7  116.21    7.90
   0 -12   7  128.55    8.27
   0 -12  -7  125.34    9.02
   0 -12   8   35.95    8.83
   0 -12  -8   35.94    5.57
   0 -12   8   39.70    5.07
   0 -12  -8   30.42    6.29
   0 -11   0    3.52    4.54
   0 -11   0   -1.92    4.23
   0 -11  -1  397.80   13.96
   0 -11   1  355.31   13.91
   0 -11  -1  353.50   12.97
   0 -11  -1  336.13   13.60
   0 -11   1  359.85   14.53
   0 -11  -2   34.95    5.69
   0 -11   2   42.68    5.96
   0 -11  -2   29.89    5.18
   0 -11   2   35.87    6.38
   0 -11   3  169.94   10.57
   0 -11  -3  182.27    9.50
   0 -11   3  174.76   10.29
   0 -11  -3  168.96    9.15
   0 -11   4   29.46    6.53
   0 -11  -4   32.35    5.62
   0 -11   4   38.22    6.40
   0 -11   4   40.30    7.87
   0 -11  -4   37.49    4.91
   0 -11  -4   41.51    5.62
   0 -11   5   42.65    7.50
   0 -11   5   37.29    6.91
   0 -11  -5   51.71    5.37
   0 -11  -5   52.22    6.01
   0 -11   6   55.27    8.19
   0 -11   6   63.30    6.89
   0 -11  -6   53.75    5.54
   0 -11  -6   59.50    6.61
   0 -11   7   61.05    9.10
   0 -11  -7   76.66    6.38
   0 -11   7   80.09    6.52
   0 -11  -7   73.37    7.26
   0 -11   8    9.66    7.39
   0 -11  -8   19.62    4.85
   0 -11   8   10.93    3.73
   0 -11  -8   14.18    5.86
   0 -11   9   54.70    9.67
   0 -11   9   57.99    4.25
   0 -11  -9   63.44    7.44
   0 -11  -9   59.35    6.32
   0 -10   0   94.94    7.03
   0 -10   0   90.92    6.49
   0 -10   1  166.67    8.85
   0 -10  -1  159.18    8.31
   0 -10  -1  165.34    8.30
   0 -10  -1  157.51    8.70
   0 -10   1  157.80    9.20
   0 -10   2   39.96    6.11
   0 -10  -2   38.27    5.24
   0 -10   2   37.05    5.57
   0 -10  -2   43.86    5.21
   0 -10  -3  228.02   10.04
   0 -10   3  204.71   11.22
   0 -10   3  202.92   10.69
   0 -10  -3  214.93    9.92
   0 -10  -3  215.97    9.05
   0 -10  -3  222.31    9.89
   0 -10  -4  546.87   16.60
   0 -10  -4  532.56   16.56
   0 -10  -4  484.27   16.38
   0 -10   4  501.38   18.01
   0 -10   4  547.54   19.32
   0 -10  -4  469.76   16.12
   0 -10  -4  522.63   15.55
   0 -10   4  547.57   19.93
   0 -10  -5  484.06   15.95
   0 -10  -5  499.95   16.87
   0 -10   5  482.34   18.76
   0 -10  -5  424.92   16.16
   0 -10  -5  484.33   14.81
   0 -10   5  465.55   17.47
   0 -10   6  187.88   12.26
   0 -10  -6  186.30    8.75
   0 -10   6  198.78   10.09
   0 -10  -6  205.87   10.15
   0 -10   7    1.08    6.74
   0 -10  -7    6.93    3.96
   0 -10   7    8.66    3.82
   0 -10  -7   16.26    5.16
   0 -10   8  162.25   12.25
   0 -10  -8  155.08    8.47
   0 -10   8  150.20    6.99
   0 -10  -8  144.35    9.51
   0 -10   9   57.83    9.53
   0 -10  -9   55.87    6.28
   0 -10   9   62.05    3.96
   0 -10  -9   66.52    7.54
   0 -10 -10   11.51    6.55
   0 -10  10   -2.55    7.77
   0 -10 -10    6.11    4.76
   0  -9   0   -0.28    3.45
   0  -9   0    4.01    3.41
   0  -9   1   31.45    5.09
   0  -9  -1   39.20    4.75
   0  -9   1   38.86    4.73
   0  -9  -1   32.50    4.40
   0  -9  -2  289.22   10.91
   0  -9   2  279.21   12.08
   0  -9   2  272.12   11.23
   0  -9  -2  305.84   11.00
   0  -9  -3  296.61   11.15
   0  -9   3  296.86   12.83
   0  -9  -3  292.48   11.23
   0  -9   3  302.65   12.23
   0  -9  -3  309.15   11.19
   0  -9  -3  287.76   10.18
   0  -9  -4  272.43   10.65
   0  -9   4  270.54   11.92
   0  -9  -4  249.81   10.72
   0  -9   4  247.39   12.26
   0  -9  -4  269.85   10.52
   0  -9  -4  252.83    9.61
   0  -9   4  232.99   12.25
   0  -9  -5   63.64    5.99
   0  -9  -5   62.78    6.48
   0  -9   5   59.59    7.59
   0  -9   5   55.40    6.44
   0  -9  -5   68.74    5.39
   0  -9  -5   65.93    5.99
   0  -9  -6  142.41    8.56
   0  -9   6  142.22    8.00
   0  -9  -6  143.69    7.50
   0  -9   6  153.86   10.81
   0  -9  -6  148.55    9.81
   0  -9  -6  149.94    8.17
   0  -9  -7   22.39    5.27
   0  -9  -7   16.90    4.19
   0  -9   7   30.07    7.24
   0  -9   7   17.20    7.54
   0  -9   7   13.99    3.54
   0  -9   8   67.69    8.91
   0  -9   8   53.51    4.16
   0  -9  -8   56.07    5.79
   0  -9   8   53.16    9.60
   0  -9  -8   64.46    7.22
   0  -9  -9   55.68    7.39
   0  -9  -9   44.75    5.67
   0  -9   9   52.32    8.60
   0  -9   9   53.19   10.54
   0  -9   9   49.99    3.28
   0  -9 -10    7.29    6.29
   0  -9 -10    2.71    4.65
   0  -9  10    3.67    6.70
   0  -9  10    2.40    8.97
   0  -9  10    1.68    1.43
   0  -9  11   10.25    9.48
   0  -9 -11    8.35    5.44
   0  -9 -11    2.95    6.66
   0  -8   0  456.95   13.76
   0  -8   0  468.81   14.44
   0  -8   1    1.87    3.48
   0  -8  -1   -1.37    3.22
   0  -8   1    0.47    2.85
   0  -8  -1    0.64    2.88
   0  -8   2  151.14    8.41
   0  -8  -2  140.23    7.10
   0  -8  -2  141.40    7.12
   0  -8   2  137.81    7.45
   0  -8  -2  159.34    7.44
   0  -8  -2  156.74    6.66
   0  -8   3  110.39    7.52
   0  -8  -3  108.21    6.30
   0  -8  -3   98.57    6.42
   0  -8   3   92.50    6.85
   0  -8   3  102.78    7.86
   0  -8  -3  105.80    6.30
   0  -8  -3  106.57    5.61
   0  -8  -4  113.20    6.72
   0  -8  -4  126.63    7.71
   0  -8   4  107.98    7.44
   0  -8   4  118.68    8.69
   0  -8   4  104.83    7.93
   0  -8  -4  111.51    6.66
   0  -8  -4  120.29    6.08
   0  -8   4  110.17    8.17
   0  -8  -5 1348.92   32.51
   0  -8  -5 1357.52   34.11
   0  -8   5 1310.48   35.18
   0  -8   5 1323.08   36.94
   0  -8  -5 1376.73   31.26
   0  -8   5 1369.21   33.27
   0  -8  -5 1423.47   32.29
   0  -8  -6   30.67    4.50
   0  -8  -6   27.65    5.17
   0  -8  -6   18.06    5.75
   0  -8   6   29.12    6.47
   0  -8   6   26.57    6.94
   0  -8  -6   22.94    4.07
   0  -8   6   25.32    3.99
   0  -8   7  224.40    8.13
   0  -8  -7  207.17    9.30
   0  -8   7  213.46   12.39
   0  -8  -7  211.60   10.77
   0  -8  -7  195.45   11.46
   0  -8   7  203.94   13.93
   0  -8  -7  229.74    9.67
   0  -8  -8   24.66    4.64
   0  -8   8   19.08    7.00
   0  -8  -8   17.97    5.69
   0  -8   8   19.93    7.74
   0  -8   8   21.68    2.77
   0  -8  -9   81.81    6.75
   0  -8  -9   78.01    8.22
   0  -8   9   73.69    9.07
   0  -8   9   79.87   11.14
   0  -8   9   85.75    3.69
   0  -8 -10  192.72   11.85
   0  -8 -10  165.96    9.48
   0  -8  10  168.67   12.54
   0  -8  10  169.77   14.71
   0  -8  10  148.67    4.02
   0  -8  11  188.45   15.58
   0  -8 -11  182.73   12.56
   0  -8 -11  165.24   10.11
   0  -7   0    4.21    3.08
   0  -7   0    1.51    2.72
   0  -7  -1 1905.54   41.83
   0  -7   1 1957.20   42.92
   0  -7  -1 1966.51   41.73
   0  -7   1 1947.67   42.12
   0  -7   1 1960.77   43.59
   0  -7   2  934.07   24.51
   0  -7  -2  944.47   22.63
   0  -7   2  905.42   23.13
   0  -7  -2  937.49   21.70
   0  -7   2  885.71   23.78
   0  -7  -2  941.45   22.51
   0  -7  -3   46.51    4.52
   0  -7  -3   44.90    4.21
   0  -7  -3   36.36    4.64
   0  -7   3   42.57    4.66
   0  -7   3   49.18    5.30
   0  -7   3   46.06    5.61
   0  -7  -3   47.76    3.79
   0  -7  -4  305.16   10.71
   0  -7  -4  292.14   11.67
   0  -7   4  291.24   12.42
   0  -7   4  305.18   13.34
   0  -7  -4  321.92   10.76
   0  -7  -4  297.35    9.70
   0  -7   4  312.03   12.17
   0  -7  -5  197.07    8.97
   0  -7  -5  194.16   10.30
   0  -7   5  180.10   10.97
   0  -7   5  190.52   10.47
   0  -7   5  186.66    8.46
   0  -7  -5  201.39    7.91
   0  -7  -5  204.88    8.41
   0  -7  -6   93.77    5.89
   0  -7   6   99.21    5.50
   0  -7  -6  102.96    7.20
   0  -7   6   82.09    8.16
   0  -7   6   75.11    8.61
   0  -7  -6   92.26    6.11
   0  -7   7  190.79    6.79
   0  -7  -7  178.57    9.96
   0  -7  -7  180.78    8.61
   0  -7   7  194.03   11.62
   0  -7   7  171.85   12.46
   0  -7  -7  191.12    8.50
   0  -7  -8  101.61    8.44
   0  -7  -8   90.98    6.79
   0  -7   8  104.41    9.28
   0  -7   8   98.01   10.86
   0  -7  -8   93.54    6.44
   0  -7   8   92.09    4.16
   0  -7  -9  131.10    9.87
   0  -7  -9  145.11    8.47
   0  -7   9  121.84   10.63
   0  -7   9  126.85   12.78
   0  -7  -9  135.30    7.34
   0  -7   9  130.30    4.29
   0  -7 -10   -0.71    4.54
   0  -7  10   -5.17    8.69
   0  -7  10    1.61    0.96
   0  -7 -10    0.97    6.02
   0  -7  11   66.34   12.28
   0  -7 -11   82.96    9.64
   0  -7 -11   67.48    7.29
   0  -7  12   10.20    9.86
   0  -7 -12    8.02    7.94
   0  -7 -12   32.22    6.48
   0  -6   0 3176.91   63.37
   0  -6   0 3084.83   63.81
   0  -6   1  768.27   19.89
   0  -6   1  754.36   19.50
   0  -6  -1  771.73   18.71
   0  -6   1  775.62   18.89
   0  -6  -1  769.81   18.55
   0  -6  -1  770.31   18.03
   0  -6   2  508.76   15.49
   0  -6  -2  495.33   13.63
   0  -6   2  514.80   15.09
   0  -6   2  484.29   14.15
   0  -6  -2  537.09   14.27
   0  -6  -2  508.72   13.01
   0  -6   3  286.96   10.36
   0  -6  -3  274.43   10.26
   0  -6   3  273.73   11.18
   0  -6   3  300.81   11.11
   0  -6  -3  268.84    9.34
   0  -6  -3  280.95    9.56
   0  -6  -3  288.99    8.79
   0  -6  -4  967.97   25.68
   0  -6  -4 1018.43   24.16
   0  -6  -4  956.47   22.69
   0  -6   4  971.18   24.46
   0  -6  -4  992.31   23.33
   0  -6   4 1005.98   26.90
   0  -6   4  966.88   25.88
   0  -6   5  179.18   10.48
   0  -6   5  181.11    9.61
   0  -6  -5  176.97    8.44
   0  -6  -5  174.30    7.32
   0  -6   5  185.44    7.39
   0  -6   6  335.62    9.88
   0  -6  -6  347.81   13.15
   0  -6  -6  346.63   11.48
   0  -6   6  317.62   13.85
   0  -6   6  350.13   15.39
   0  -6  -6  340.03   11.14
   0  -6  -7  161.29    9.53
   0  -6  -7  163.65    8.15
   0  -6   7  162.20   10.41
   0  -6   7  153.17   11.54
   0  -6  -7  159.56    7.41
   0  -6   7  148.41    5.47
   0  -6  -8  185.72   11.07
   0  -6   8  186.54   11.56
   0  -6  -8  208.21    9.73
   0  -6   8  201.21   13.59
   0  -6  -8  193.29    8.27
   0  -6   8  186.05    5.66
   0  -6   9  142.27   10.67
   0  -6   9  144.18   12.69
   0  -6   9  139.81    4.24
   0  -6  -9  130.24    7.20
   0  -6  -9  137.53    8.71
   0  -6  10  563.38   24.51
   0  -6 -10  555.15   16.29
   0  -6 -10  558.88   18.87
   0  -6  11   12.27    8.28
   0  -6 -11   22.59    5.87
   0  -6  12    0.82    9.23
   0  -6 -12   15.63    6.14
   0  -5   0    0.58    2.39
   0  -5   0   -1.16    2.08
   0  -5   1 4179.80   83.56
   0  -5  -1 4223.78   82.28
   0  -5   1 4173.57   82.51
   0  -5   1 4122.83   83.18
   0  -5  -1 4100.24   82.17
   0  -5  -1 4192.89   81.62
   0  -5   2  690.43   18.36
   0  -5   2  675.41   17.25
   0  -5  -2  691.35   17.31
   0  -5  -2  699.45   15.96
   0  -5  -2  667.54   16.52
   0  -5   2  699.28   18.11
   0  -5  -3  129.64    5.93
   0  -5  -3  132.23    7.03
   0  -5   3  130.26    6.61
   0  -5  -3  118.13    5.93
   0  -5   3  136.48    7.63
   0  -5   3  125.93    7.08
   0  -5  -3  109.16    6.04
   0  -5   3  121.60    6.74
   0  -5  -3  123.77    5.23
   0  -5  -4 2532.91   53.25
   0  -5  -4 2550.98   51.83
   0  -5   4 2448.58   54.75
   0  -5   4 2480.22   55.87
   0  -5   4 2553.91   52.35
   0  -5  -4 2511.01   51.94
   0  -5   5 1369.83   29.59
   0  -5  -5 1317.74   32.40
   0  -5   5 1380.25   33.85
   0  -5  -5 1349.96   31.01
   0  -5   5 1402.35   35.45
   0  -5  -5 1431.47   30.70
   0  -5   6  490.18   12.01
   0  -5   6  470.90   16.81
   0  -5  -6  490.24   14.71
   0  -5   6  457.89   18.02
   0  -5  -6  511.99   13.81
   0  -5  -7   32.05    4.83
   0  -5   7   19.90    6.23
   0  -5   7   29.61    2.30
   0  -5  -7   24.39    3.81
   0  -5   7   25.61    5.73
   0  -5  -8   36.01    5.65
   0  -5   8   39.20    7.78
   0  -5   8   41.18    2.39
   0  -5  -8   45.93    4.45
   0  -5   8   33.58    6.32
   0  -5  -9   57.26    6.70
   0  -5  -9   52.35    4.70
   0  -5   9   51.66    2.46
   0  -5 -10   48.53    6.67
   0  -5  10   49.76    9.48
   0  -5  10   40.54    2.01
   0  -5 -10   50.42    4.75
   0  -5  11  151.67   14.14
   0  -5 -11  153.83    7.62
   0  -5 -11  165.69   10.60
   0  -5  12   30.18    9.52
   0  -5 -12    9.24    6.27
   0  -4   0 7699.27  146.93
   0  -4   0 7586.01  147.23
   0  -4  -1 3267.09   64.22
   0  -4   1 3244.04   65.06
   0  -4   1 3251.85   64.47
   0  -4  -1 3321.98   64.46
   0  -4  -1 3225.53   63.62
   0  -4   1 3185.60   65.29
   0  -4  -2  203.98    6.76
   0  -4   2  213.21    7.80
   0  -4   2  212.30    7.98
   0  -4  -2  204.37    7.66
   0  -4   2  208.06    7.22
   0  -4  -2  192.72    6.11
   0  -4   3  168.20    6.81
   0  -4  -3  183.67    7.04
   0  -4   3  171.75    8.16
   0  -4   3  158.80    7.35
   0  -4  -3  168.78    6.27
   0  -4  -3  164.40    7.06
   0  -4  -3  167.91    6.05
   0  -4  -4  372.74   10.61
   0  -4  -4  367.95   10.96
   0  -4   4  390.09   11.56
   0  -4   4  375.29   13.64
   0  -4   4  358.01   12.64
   0  -4  -4  389.59   12.48
   0  -4   4  382.41   10.16
   0  -4  -5 3088.12   61.42
   0  -4  -5 3013.00   62.79
   0  -4   5 3095.54   62.41
   0  -4   5 2949.30   64.76
   0  -4  -5 3007.62   64.95
   0  -4   5 3019.03   66.54
   0  -4   5 3030.42   59.88
   0  -4  -6  236.99    9.71
   0  -4   6  249.71    9.04
   0  -4   6  229.07   10.84
   0  -4   6  238.17   12.19
   0  -4   6  238.25    6.50
   0  -4  -6  244.94    8.27
   0  -4  -7  107.49    7.33
   0  -4   7  125.92    8.76
   0  -4   7  102.10    9.51
   0  -4   7  113.32    6.33
   0  -4  -7  117.31    5.78
   0  -4   7  114.84    3.89
   0  -4   8   65.00    5.28
   0  -4  -8   65.04    6.81
   0  -4  -8   62.78    4.59
   0  -4   8   66.61    2.84
   0  -4   8   64.07    8.56
   0  -4  -9   78.72    7.64
   0  -4   9   83.77   10.08
   0  -4   9   77.31    3.13
   0  -4  -9   81.32    5.22
   0  -4  10  138.51   12.32
   0  -4 -10  123.05    6.49
   0  -4 -10  127.36    9.43
   0  -4 -11  115.28    9.64
   0  -4 -11  111.07    6.33
   0  -4  11  130.71   12.51
   0  -4  12   17.69    8.54
   0  -4 -12   -2.93    6.24
   0  -4  13    0.82    9.24
   0  -4 -13    9.32    6.42
   0  -3   0    2.50    1.58
   0  -3   0   -0.17    1.75
   0  -3   1 9853.26  189.10
   0  -3  -1 9748.64  188.29
   0  -3   1 9831.58  189.28
   0  -3   1 9974.62  188.63
   0  -3  -1 9999.00  188.75
   0  -3  -1 9850.30  187.88
   0  -3   2 1038.41   22.78
   0  -3  -2 1040.86   22.56
   0  -3   2 1053.89   23.65
   0  -3   2 1007.16   23.16
   0  -3  -2 1041.98   22.10
   0  -3  -2  979.99   22.55
   0  -3  -2 1057.78   21.83
   0  -3  -3  594.57   14.35
   0  -3   3  569.34   13.74
   0  -3   3  597.99   15.68
   0  -3   3  615.39   16.46
   0  -3  -3  583.01   15.46
   0  -3  -3  602.68   14.01
   0  -3  -4 1084.30   23.07
   0  -3  -4 1059.48   24.35
   0  -3   4 1097.75   23.86
   0  -3   4 1060.44   25.70
   0  -3   4 1107.98   27.00
   0  -3  -4 1064.28   25.82
   0  -3   4  988.28   21.86
   0  -3   5 1038.04   23.83
   0  -3   5 1013.99   26.29
   0  -3  -5 1051.84   25.40
   0  -3  -5 1038.39   26.85
   0  -3   5 1051.01   27.92
   0  -3   5 1059.78   21.64
   0  -3  -5 1060.48   23.24
   0  -3   6  535.82   14.32
   0  -3   6  528.50   16.95
   0  -3  -6  548.49   17.83
   0  -3   6  527.70   18.62
   0  -3  -6  545.87   13.78
   0  -3   6  550.13   11.95
   0  -3  -6  525.81   16.31
   0  -3   7   16.42    3.37
   0  -3   7   18.41    5.82
   0  -3  -7   11.57    2.59
   0  -3   7   18.40    1.78
   0  -3  -7   15.03    4.60
   0  -3   8  286.33    9.74
   0  -3  -8  292.53   12.89
   0  -3   8  294.93   14.99
   0  -3  -8  287.33    9.22
   0  -3   8  284.19    7.31
   0  -3  -9  148.52    9.32
   0  -3  -9  142.53    9.81
   0  -3   9  143.95   11.42
   0  -3  -9  149.12    6.49
   0  -3   9  144.90    4.72
   0  -3  10  266.01    9.38
   0  -3 -10  242.82   13.07
   0  -3  10  244.01   15.20
   0  -3 -10  254.78    9.06
   0  -3 -10  271.28   13.09
   0  -3 -11  165.31   11.55
   0  -3 -11  171.48    7.56
   0  -3  11  178.93   14.05
   0  -3  12   88.98   11.74
   0  -3 -12   91.57   10.06
   0  -3  13   27.70    9.77
   0  -3 -13   39.88    8.63
   0  -2   0 4607.76   87.90
   0  -2   0 4569.06   88.01
   0  -2  -1  378.44    8.76
   0  -2   1  349.83    9.19
   0  -2   1  373.41    9.34
   0  -2   1  388.14    8.94
   0  -2  -1  364.66    8.33
   0  -2   2 1006.56   22.03
   0  -2   2  992.26   22.41
   0  -2  -2  995.02   20.82
   0  -2  -2  976.30   21.74
   0  -2  -2 1016.35   21.17
   0  -2  -3 1627.48   33.91
   0  -2  -3 1641.28   32.55
   0  -2   3 1599.13   34.48
   0  -2   3 1651.66   35.42
   0  -2  -3 1585.27   34.73
   0  -2   3 1562.17   31.69
   0  -2   4  944.23   20.59
   0  -2  -4  927.93   22.28
   0  -2   4  921.52   18.80
   0  -2  -4  911.38   19.94
   0  -2   4  914.44   22.48
   0  -2   4  954.89   23.87
   0  -2  -4  898.54   22.94
   0  -2   4  899.79   24.58
   0  -2  -5 1183.12   28.36
   0  -2   5 1193.89   31.17
   0  -2  -5 1169.01   24.97
   0  -2   5 1175.38   23.60
   0  -2   5 1162.51   28.14
   0  -2   5 1144.31   29.69
   0  -2  -5 1107.39   28.89
   0  -2   5 1185.93   25.63
   0  -2   6  431.98   17.26
   0  -2  -6  454.82   15.11
   0  -2  -6  453.95   15.78
   0  -2   6  433.90   16.46
   0  -2   6  449.76   12.21
   0  -2  -6  454.33   11.59
   0  -2   6  462.05   10.31
   0  -2  -7  401.81   14.86
   0  -2   7  400.71   17.32
   0  -2  -7  383.15   10.72
   0  -2   7  404.10    9.52
   0  -2  -7  382.71   15.52
   0  -2   7  386.22   16.16
   0  -2   7  419.83   11.54
   0  -2   8   -2.81    6.54
   0  -2  -8    1.97    4.95
   0  -2   8    1.99    1.74
   0  -2  -8    2.04    2.34
   0  -2  -8   10.05    4.63
   0  -2  -8   12.26    6.15
   0  -2   8   -0.97    5.91
   0  -2   8    1.50    3.08
   0  -2  -9   87.76    8.59
   0  -2   9  106.98   11.18
   0  -2  -9   97.14    5.06
   0  -2   9   91.01    3.95
   0  -2  -9   86.03    7.93
   0  -2   9   97.98   10.08
   0  -2   9   91.09    5.42
   0  -2 -10  459.07   18.83
   0  -2 -10  465.30   12.97
   0  -2 -10  461.21   17.70
   0  -2  10  461.70   20.59
   0  -2  10  451.16   12.87
   0  -2 -11   36.28    4.12
   0  -2  11   42.90    8.87
   0  -2  11   31.79    3.91
   0  -2 -11   32.39    7.80
   0  -2 -12   46.76    8.55
   0  -2  12   41.59    9.38
   0  -2 -13   50.31    9.36
   0  -2  13   50.47    9.98
   0  -1   0    1.02    0.50
   0  -1  -1 2083.15   40.02
   0  -1  -1 2032.23   39.76
   0  -1   1 2093.03   40.44
   0  -1   1 2091.24   40.65
   0  -1  -1 2048.85   40.22
   0  -1   1 2021.75   40.03
   0  -1   2  387.17    9.96
   0  -1  -2  400.37    8.73
   0  -1  -2  378.13   10.25
   0  -1   2  380.14   10.40
   0  -1  -2  384.15   10.00
   0  -1   2  405.22   11.35
   0  -1   3 2998.28   60.91
   0  -1   3 3025.42   61.83
   0  -1  -3 2971.58   61.47
   0  -1   3 3036.88   62.86
   0  -1  -3 3019.27   61.47
   0  -1  -3 3067.01   58.82
   0  -1  -4  101.68    6.22
   0  -1   4  106.23    7.28
   0  -1   4   95.81    6.25
   0  -1  -4   91.35    6.03
   0  -1   4   96.62    4.13
   0  -1  -4  103.38    3.72
   0  -1   4   98.29    3.07
   0  -1   5  989.00   27.15
   0  -1  -5 1015.39   25.67
   0  -1  -5  999.16   21.21
   0  -1   5  995.70   20.45
   0  -1  -5 1006.06   25.68
   0  -1   5 1003.17   25.97
   0  -1   5  983.08   21.72
   0  -1   6 1290.48   33.76
   0  -1  -6 1225.35   31.46
   0  -1  -6 1224.55   26.15
   0  -1   6 1249.37   25.44
   0  -1  -6 1205.66   29.65
   0  -1   6 1259.29   32.09
   0  -1  -6 1240.43   31.56
   0  -1   6 1249.51   26.80
   0  -1   7  460.85   18.45
   0  -1  -7  467.44   16.90
   0  -1  -7  444.50   11.50
   0  -1   7  450.82   10.87
   0  -1  -7  445.38   14.86
   0  -1  -7  458.85   16.87
   0  -1   7  441.49   17.08
   0  -1   7  463.23   12.21
   0  -1   8   39.16    7.71
   0  -1  -8   45.45    6.94
   0  -1   8   34.73    2.79
   0  -1  -8   39.00    3.22
   0  -1  -8   37.57    5.71
   0  -1  -8   35.78    6.86
   0  -1   8   35.54    6.40
   0  -1   8   33.04    3.63
   0  -1  -9  539.93   20.41
   0  -1   9  533.45   22.64
   0  -1  -9  551.15   14.09
   0  -1  -9  531.05   18.65
   0  -1   9  512.20   20.73
   0  -1  -9  553.91   20.90
   0  -1   9  555.69   14.40
   0  -1 -10   65.75    9.12
   0  -1 -10   60.74    4.42
   0  -1 -10   55.08    7.85
   0  -1  10   64.78    9.27
   0  -1  10   62.70    4.61
   0  -1 -11  233.34   14.33
   0  -1  11  204.55   14.39
   0  -1  11  205.97    7.51
   0  -1 -11  199.68    7.89
   0  -1 -12  101.28   10.89
   0  -1  12  103.63    4.99
   0  -1  12   86.22   11.10
   0  -1  13   75.42   11.47
   0  -1 -13   57.53    9.90
   0   0  -1  446.59   10.00
   0   0   1  457.69   10.03
   0   0  -1  452.01   10.23
   0   0   1  463.64   10.29
   0   0  -2 6555.92  125.58
   0   0  -2 6606.28  124.11
   0   0  -2 6400.10  126.24
   0   0   2 6495.91  126.25
   0   0   2 6575.28  126.87
   0   0  -2 6431.62  126.64
   0   0  -3    6.12    2.80
   0   0  -3    5.10    1.16
   0   0  -3    4.23    3.28
   0   0   3    4.13    2.99
   0   0  -3    4.08    3.27
   0   0   3    8.12    4.07
   0   0  -4  248.96   10.09
   0   0   4  281.03   11.06
   0   0  -4  253.83    6.54
   0   0   4  276.28    6.62
   0   0  -4  268.69    8.99
   0   0   4  269.04    9.88
   0   0  -4  266.18    9.77
   0   0   4  258.40    7.03
   0   0   5  193.07   10.27
   0   0  -5  180.18    9.39
   0   0  -5  186.81    5.53
   0   0  -5  200.10    8.41
   0   0  -5  176.96    8.91
   0   0   5  197.09    9.11
   0   0   5  192.81    6.20
   0   0   6    1.62    5.41
   0   0  -6    4.31    4.60
   0   0   6    3.00    1.81
   0   0  -6   -1.10    1.65
   0   0  -6    3.30    3.95
   0   0   6    0.67    3.93
   0   0  -6   -3.23    4.60
   0   0   6   -1.40    2.40
   0   0  -7  120.18    8.95
   0   0   7  114.26    9.92
   0   0  -7  112.87    4.60
   0   0   7  118.01    4.64
   0   0  -7  125.04    7.65
   0   0   7  125.86    8.59
   0   0  -7  117.52    8.60
   0   0   7  113.65    5.20
   0   0  -8   58.15    7.47
   0   0  -8   65.03    3.77
   0   0  -8   65.50    6.67
   0   0   8   50.90    6.82
   0   0  -8   65.62    7.66
   0   0   8   64.74    4.28
   0   0  -9  401.33   17.88
   0   0  -9  408.73   11.25
   0   0  -9  401.28   15.79
   0   0   9  438.00   18.07
   0   0  -9  399.70   17.38
   0   0   9  392.60   11.49
   0   0 -10  497.31   20.73
   0   0 -10  485.21   13.21
   0   0 -10  518.00   18.84
   0   0  10  470.56   20.11
   0   0  10  485.87   13.23
   0   0 -11    9.15    7.41
   0   0  11   14.70    7.46
   0   0  11    8.61    3.12
   0   0 -11    4.23    3.04
   0   0 -12   -5.19    7.37
   0   0  12   -1.37    2.81
   0   0  12    3.97    7.13
   0   0  13    4.22    8.49
   0   0 -13    7.49    8.52
   0   1  -1 2046.05   40.46
   0   1   1 2081.94   40.54
   0   1  -1 2060.59   40.92
   0   1  -1 2035.66   40.76
   0   1   1 2140.93   40.60
   0   1  -1 2099.55   40.51
   0   1  -2  392.57    9.02
   0   1   2  389.02   10.31
   0   1  -2  409.67   11.45
   0   1   2  402.19    8.78
   0   1  -2  382.16    9.96
   0   1  -2  362.01   10.22
   0   1   2  404.37   10.05
   0   1  -2  379.60    8.38
   0   1  -3 2945.32   57.89
   0   1   3 2994.71   60.71
   0   1  -3 3055.69   61.94
   0   1  -3 2932.80   59.70
   0   1   3 2982.29   60.22
   0   1  -3 2916.63   60.35
   0   1  -3 2968.29   57.19
   0   1   4  101.20    6.76
   0   1  -4   95.41    7.00
   0   1  -4   98.74    3.36
   0   1   4   91.33    3.65
   0   1  -4   99.67    5.72
   0   1   4   94.55    5.87
   0   1  -4   96.38    6.24
   0   1  -4   95.11    3.93
   0   1   5 1003.57   26.82
   0   1  -5  960.51   26.98
   0   1  -5  993.97   21.02
   0   1   5 1018.94   21.64
   0   1  -5  982.98   24.60
   0   1  -5  990.53   25.81
   0   1   5 1024.51   25.73
   0   1  -5 1007.24   21.59
   0   1   5 1023.10   21.63
   0   1   6 1221.66   32.89
   0   1  -6 1214.22   32.81
   0   1  -6 1223.98   25.79
   0   1   6 1221.11   26.29
   0   1  -6 1202.27   29.96
   0   1  -6 1202.34   31.20
   0   1   6 1262.62   31.65
   0   1   6 1282.52   26.52
   0   1  -7  434.39   17.62
   0   1   7  447.01   11.93
   0   1  -7  446.86   15.43
   0   1  -7  447.18   16.53
   0   1   7  464.66   16.75
   0   1  -7  465.87   11.43
   0   1  -8   36.13    7.55
   0   1   8   40.83    3.68
   0   1  -8   32.72    5.91
   0   1   8   35.86    6.57
   0   1  -8   44.02    6.91
   0   1  -8   38.77    3.13
   0   1  -9  544.91   21.98
   0   1   9  564.29   14.71
   0   1  -9  573.32   19.50
   0   1  -9  570.02   20.69
   0   1   9  587.83   20.95
   0   1  -9  553.24   14.26
   0   1 -10   53.89    9.17
   0   1  10   60.81    4.59
   0   1  10   62.19    8.42
   0   1 -10   55.00    4.17
   0   1  11  219.95   13.83
   0   1  11  201.10    7.65
   0   1 -11  216.94   14.99
   0   1  12   91.38   10.50
   0   1 -12   96.66   11.77
   0   1  12   95.04    5.06
   0   1  13   62.68    9.99
   0   1 -13   51.47   10.94
   0   2   0 4562.22   88.45
   0   2   0 4621.55   88.37
   0   2   0 4654.68   88.17
   0   2  -1  371.20    9.19
   0   2   1  375.62    8.41
   0   2   1  359.60    8.85
   0   2  -1  378.68    9.17
   0   2  -1  356.94    8.69
   0   2   2  976.64   21.65
   0   2  -2  981.44   21.51
   0   2  -2 1001.48   22.01
   0   2  -2  996.96   22.21
   0   2   2 1053.16   21.75
   0   2  -2 1011.84   21.52
   0   2  -3 1589.63   33.01
   0   2  -3 1574.07   34.19
   0   2  -3 1601.55   34.70
   0   2   3 1594.90   34.55
   0   2  -3 1642.28   36.79
   0   2   3 1585.77   33.99
   0   2  -3 1601.69   32.35
   0   2  -4  922.77   20.75
   0   2  -4  953.48   22.72
   0   2  -4  918.08   23.29
   0   2  -4  927.31   25.24
   0   2   4  957.81   23.61
   0   2   4  941.19   22.73
   0   2  -4  927.80   19.88
   0   2  -5 1162.74   25.36
   0   2  -5 1178.80   28.07
   0   2  -5 1185.89   29.02
   0   2  -5 1182.77   31.40
   0   2   5 1181.84   28.42
   0   2  -5 1133.65   24.38
   0   2  -6  456.20   11.98
   0   2  -6  431.47   14.71
   0   2  -6  470.20   17.85
   0   2  -6  443.50   15.71
   0   2   6  445.71   15.14
   0   2  -6  454.44   11.26
   0   2   7  401.04   11.21
   0   2  -7  418.51   11.29
   0   2  -7  410.63   17.53
   0   2  -7  418.82   14.84
   0   2  -7  425.10   15.76
   0   2   7  395.56   15.26
   0   2  -7  405.08   10.72
   0   2  -8    7.14    6.92
   0   2  -8    3.34    2.43
   0   2  -8    5.06    4.82
   0   2  -8    2.51    5.70
   0   2   8   11.92    4.97
   0   2   8   -1.10    2.89
   0   2  -9   86.17   10.16
   0   2   9   90.91    5.39
   0   2  -9   86.56    8.51
   0   2  -9   86.97    9.16
   0   2   9   94.22    8.94
   0   2  -9   98.98    5.05
   0   2 -10  476.70   21.41
   0   2  10  461.26   13.18
   0   2  10  487.84   19.58
   0   2 -10  462.79   12.81
   0   2 -11   44.74    9.55
   0   2  11   36.67    7.78
   0   2  11   27.40    3.99
   0   2 -12   39.87   10.05
   0   2  12   49.90    8.69
   0   2  12   43.46    4.12
   0   2  13   42.35    9.08
   0   2 -13   68.17   11.67
   0   3   0    2.51    1.84
   0   3   0   -1.20    1.48
   0   3   0    0.08    1.72
   0   3  -1 9804.00  190.06
   0   3  -1 9844.35  189.39
   0   3  -1 9942.46  189.58
   0   3   1 9925.13  188.45
   0   3  -1 9950.84  188.90
   0   3  -2 1001.45   22.86
   0   3   2 1031.56   22.11
   0   3  -2 1041.40   22.91
   0   3  -2 1031.25   22.25
   0   3  -2 1001.49   22.96
   0   3  -3  573.89   15.31
   0   3  -3  567.97   15.48
   0   3  -3  597.67   14.91
   0   3  -3  599.53   14.76
   0   3  -3  573.26   17.76
   0   3  -4 1096.82   26.44
   0   3  -4 1073.68   25.90
   0   3  -4 1096.50   24.72
   0   3   4 1069.14   25.45
   0   3  -4 1108.23   29.17
   0   3  -5 1057.95   29.76
   0   3  -5 1068.77   24.08
   0   3  -5 1073.40   26.75
   0   3  -5 1056.48   26.07
   0   3   5 1046.01   25.89
   0   3  -5  988.79   23.01
   0   3  -6  534.66   20.25
   0   3  -6  566.76   14.71
   0   3  -6  553.45   17.04
   0   3  -6  513.21   17.23
   0   3   6  560.73   17.05
   0   3  -6  521.50   13.55
   0   3  -7   17.95    3.07
   0   3  -7   15.14    6.66
   0   3  -7   18.33    3.43
   0   3  -7   19.91    4.95
   0   3  -7   18.46    5.44
   0   3   7    7.94    4.47
   0   3  -8  305.30   16.40
   0   3  -8  293.02    9.76
   0   3   8  295.09    9.56
   0   3  -8  310.63   13.25
   0   3  -8  309.76   13.89
   0   3   8  302.17   13.49
   0   3  -8  279.87    9.14
   0   3  -9  142.41   12.38
   0   3   9  130.86   11.96
   0   3   9  140.27    6.63
   0   3  -9  137.21    6.39
   0   3  -9  140.20    9.94
   0   3  -9  138.81   10.82
   0   3   9  150.20   10.33
   0   3  -9  135.62    6.08
   0   3  10  244.91    9.17
   0   3  10  259.08   13.94
   0   3 -10  255.29    8.64
   0   3 -10  261.40   16.60
   0   3  11  195.67   12.58
   0   3  11  169.69    7.60
   0   3 -11  208.92   15.70
   0   3  12   92.48    5.65
   0   3  12  103.88   10.26
   0   3 -12   76.44   11.99
   0   3  13   36.87    8.24
   0   3 -13   36.62   10.78
   0   4   0 7673.35  144.45
   0   4   0 7384.03  143.88
   0   4  -1 3198.06   66.18
   0   4  -1 3329.02   64.54
   0   4   1 3255.38   65.55
   0   4  -2  199.73    7.77
   0   4  -2  207.10    6.89
   0   4  -2  213.28    7.66
   0   4  -3  159.02    7.28
   0   4  -3  168.89    7.57
   0   4  -3  172.76    7.40
   0   4  -3  175.05    6.73
   0   4  -4  371.58   12.48
   0   4  -4  363.22   15.10
   0   4  -4  354.86   12.52
   0   4  -4  390.70   11.99
   0   4  -4  391.27   11.70
   0   4  -5 3145.37   63.91
   0   4  -5 3097.66   65.27
   0   4  -5 2930.38   65.41
   0   4  -5 3010.84   69.64
   0   4   5 3178.38   64.83
   0   4  -5 3101.91   64.07
   0   4  -6  241.37    9.32
   0   4  -6  261.00   11.43
   0   4  -6  231.05   10.61
   0   4  -6  233.55   13.57
   0   4   6  245.86   10.44
   0   4  -6  273.14   10.18
   0   4  -7  124.79    8.79
   0   4  -7  120.78    8.38
   0   4  -7  116.15   10.78
   0   4   7  104.69    7.45
   0   4  -7  125.93    6.71
   0   4  -8   61.85    5.26
   0   4  -8   62.04    7.13
   0   4  -8   77.55   10.07
   0   4   8   67.26    8.73
   0   4  -8   64.82    7.65
   0   4   8   61.26    6.73
   0   4  -9   81.70    5.79
   0   4   9   97.71    5.76
   0   4  -9   76.80    7.98
   0   4  -9   82.01    8.67
   0   4   9   70.27    7.50
   0   4   9   77.60   10.50
   0   4  -9   70.05   10.78
   0   4  10  127.29    9.92
   0   4 -10  127.04    6.44
   0   4  10  113.53    6.51
   0   4 -10  122.38   13.07
   0   4  11  123.20   10.56
   0   4 -11  124.72   13.62
   0   4  11  106.73    6.43
   0   4 -12   22.96    9.43
   0   4  12    6.80    6.24
   0   4  12   11.17    3.84
   0   4 -13    2.58    9.76
   0   4  13    2.42    6.82
   0   5   0    1.70    2.70
   0   5  -1 4162.90   84.71
   0   5   1 4207.49   83.69
   0   5  -1 4188.65   82.44
   0   5  -2  653.37   18.07
   0   5  -2  687.68   16.52
   0   5  -3  126.74    7.05
   0   5  -3  130.99    6.02
   0   5  -3  133.41    7.11
   0   5  -4 2623.60   54.91
   0   5  -4 2574.82   53.62
   0   5  -4 2492.20   54.94
   0   5  -5 1307.66   32.69
   0   5  -5 1363.06   33.27
   0   5  -5 1397.19   32.36
   0   5  -5 1409.09   31.86
   0   5  -6  507.62   16.78
   0   5  -6  506.01   17.05
   0   5   6  501.73   17.49
   0   5  -6  493.73   20.79
   0   5  -6  522.05   15.72
   0   5  -6  517.78   15.61
   0   5  -7   20.79    4.61
   0   5  -7   30.25    5.65
   0   5  -7   23.72    7.75
   0   5   7   35.09    6.93
   0   5  -7   20.02    5.70
   0   5  -7   34.43    4.82
   0   5   7   30.29    4.90
   0   5  -8   32.67    4.83
   0   5  -8   56.39    7.04
   0   5  -8   50.39    7.41
   0   5  -8   37.83    9.34
   0   5   8   44.36    8.16
   0   5   8   48.69    6.24
   0   5   9   52.17    9.40
   0   5  -9   33.89    9.41
   0   5  -9   51.51    5.46
   0   5   9   55.68    6.94
   0   5 -10   54.36   10.60
   0   5  10   44.21    4.95
   0   5 -10   54.04    5.42
   0   5  10   40.92    6.78
   0   5  11  157.21   11.16
   0   5 -11  171.86    7.81
   0   5  11  148.21    7.79
   0   5 -11  160.26   15.31
   0   5  12   21.30    4.54
   0   5  12   17.00    6.51
   0   5 -12   18.99    9.98
   0   6   0 3036.53   62.06
   0   6   0 3103.85   62.22
   0   6   1  776.13   18.46
   0   6   1  716.83   19.23
   0   6  -1  773.75   18.18
   0   6  -1  733.33   20.54
   0   6   2  517.21   14.27
   0   6  -2  475.66   15.41
   0   6  -2  510.83   13.50
   0   6  -3  272.97   11.06
   0   6  -3  286.08    9.51
   0   6  -3  280.39   10.43
   0   6  -4  990.73   25.98
   0   6  -4 1008.42   24.21
   0   6  -4 1009.68   25.59
   0   6   5  178.41    9.05
   0   6  -5  194.28   12.41
   0   6  -5  172.20    8.98
   0   6  -5  178.85    8.12
   0   6  -5  187.80    9.38
   0   6  -6  324.42   16.86
   0   6   6  346.81   14.00
   0   6  -6  315.97   12.53
   0   6  -6  348.35   12.14
   0   6  -6  326.00   13.16
   0   6  -7  176.01   13.59
   0   6   7  176.37   11.17
   0   6  -7  155.07    9.98
   0   6  -7  165.72    8.92
   0   6  -7  159.69    8.61
   0   6  -8  187.92   11.23
   0   6  -8  213.44   10.08
   0   6   8  193.15   12.66
   0   6  -8  199.30   15.35
   0   6  -8  225.21   12.04
   0   6  -9  140.70    8.30
   0   6  -9  129.37   13.62
   0   6 -10  591.97   17.82
   0   6 -10  581.63   26.78
   0   6 -11   21.34    4.53
   0   6 -11   33.29   10.57
   0   6  11   17.70    4.51
   0   6 -12   10.96   10.10
   0   7   0    1.81    4.12
   0   7   0   -1.34    3.03
   0   7   0    0.18    2.81
   0   7  -1 1929.93   44.88
   0   7   1 1932.97   43.07
   0   7  -1 1993.01   41.79
   0   7  -1 1928.98   42.09
   0   7   1 2015.44   42.09
   0   7  -2  906.73   25.06
   0   7  -2  939.06   22.42
   0   7  -2  970.06   23.27
   0   7   2  944.15   23.18
   0   7  -3   37.38    5.54
   0   7   3   40.52    4.18
   0   7  -3   41.88    4.18
   0   7   4  304.93   11.18
   0   7  -4  311.98   12.77
   0   7  -4  329.31   10.95
   0   7  -4  294.61   11.81
   0   7   5  199.65    9.71
   0   7  -5  177.96    9.79
   0   7  -5  177.66    8.24
   0   7  -5  182.16    9.65
   0   7   6   85.46    7.92
   0   7  -6  101.05    7.91
   0   7  -6   98.52    6.78
   0   7  -6   87.50    7.50
   0   7   7  185.62   11.44
   0   7  -7  171.45   14.02
   0   7  -7  204.62   10.51
   0   7  -7  192.86    9.49
   0   7  -7  188.95   10.91
   0   7   8   87.72   10.03
   0   7  -8  108.16   12.49
   0   7  -8   93.28    7.72
   0   7  -9  141.29   14.15
   0   7  -9  130.45    8.88
   0   7 -10   -5.27   10.48
   0   7 -10    4.19    5.11
   0   7 -11   68.87   13.28
   0   7 -12   18.16   10.92
   0   8   0  456.60   16.41
   0   8   0  456.76   12.58
   0   8   0  462.63   14.05
   0   8   0  465.04   13.64
   0   8  -1    3.54    4.30
   0   8   1   -2.33    3.34
   0   8  -1    0.86    3.23
   0   8   1    1.45    2.45
   0   8  -1    3.89    2.88
   0   8   1   -0.27    3.64
   0   8  -2  157.75    7.64
   0   8   2  157.03    7.77
   0   8  -2  150.58    7.04
   0   8   2  159.30    6.69
   0   8  -3  110.62    6.82
   0   8  -3  103.48    8.02
   0   8  -3  107.72    6.18
   0   8   3  101.24    5.94
   0   8  -4  111.48    7.42
   0   8   4  121.88    7.01
   0   8  -4  102.28    8.32
   0   8  -4  115.91    6.65
   0   8  -5 1365.66   33.86
   0   8   5 1362.67   33.62
   0   8  -5 1357.02   35.29
   0   8  -5 1379.72   32.38
   0   8  -5 1384.24   34.22
   0   8   6   29.55    6.39
   0   8  -6   18.36    5.92
   0   8  -6   23.79    4.76
   0   8  -6   35.59    6.51
   0   8  -6   42.67    6.08
   0   8   7  206.64   12.39
   0   8  -7  224.97   11.78
   0   8  -7  196.42    9.95
   0   8  -7  224.05   11.92
   0   8  -8   15.57    5.85
   0   8  -9   74.97    7.66
   0   8 -10  177.51   15.99
   0   8 -10  170.52   10.15
   0   8 -11  180.97   17.36
   0   9   0   -4.42    4.78
   0   9   0    2.14    2.79
   0   9   0   -1.59    3.87
   0   9   0    1.16    3.44
   0   9   1   28.86    6.25
   0   9   1   37.65    4.75
   0   9  -1   40.49    4.70
   0   9  -1   43.21    4.11
   0   9   1   37.93    3.87
   0   9  -1   37.29    4.49
   0   9   1   41.98    5.57
   0   9  -2  271.86   13.10
   0   9   2  285.39    9.93
   0   9  -2  302.52   11.13
   0   9   2  294.70   11.29
   0   9  -2  301.42   10.06
   0   9  -2  291.49   10.56
   0   9  -3  317.86   11.92
   0   9   3  285.06   11.89
   0   9  -3  295.55   13.85
   0   9  -3  303.59   11.02
   0   9   3  302.61   10.79
   0   9  -4  249.90   11.11
   0   9  -4  243.72   12.90
   0   9  -4  252.90   10.07
   0   9   4  281.90   10.96
   0   9  -5   53.09    6.40
   0   9   5   60.01    6.66
   0   9  -5   73.73    8.04
   0   9  -5   55.16    5.64
   0   9  -6  135.77    9.31
   0   9   6  152.84    9.99
   0   9  -6  163.67   10.02
   0   9  -6  125.78    9.85
   0   9  -6  150.11    8.14
   0   9  -7   33.12    7.06
   0   9  -8   64.48    8.01
   0   9  -9   60.97    7.96
   0   9 -10   10.55    6.02
   0  10   0   79.33    8.29
   0  10   0  100.01    5.63
   0  10   0   74.41    6.65
   0  10   0   83.86    6.36
   0  10  -1  165.72   11.08
   0  10   1  154.09   11.07
   0  10  -1  168.08    7.41
   0  10   1  173.57    7.59
   0  10   1  182.09    9.98
   0  10  -1  168.57    8.59
   0  10   1  166.68    8.65
   0  10  -1  178.14    8.59
   0  10  -2   43.09    7.45
   0  10   2   50.17    5.91
   0  10  -2   46.09    5.52
   0  10  -2   47.49    4.53
   0  10   2   41.28    4.56
   0  10  -2   45.71    5.12
   0  10  -3  220.77   12.84
   0  10   3  238.70    9.80
   0  10   3  230.03   11.00
   0  10  -3  241.27   10.49
   0  10  -3  235.08    9.26
   0  10  -3  228.37    9.96
   0  10   4  531.89   16.63
   0  10  -4  528.66   17.21
   0  10  -4  503.78   19.75
   0  10  -4  515.40   16.08
   0  10   5  487.60   16.82
   0  10  -5  470.26   18.96
   0  10  -5  497.74   17.12
   0  10  -6  204.57   12.63
   0  10  -7   13.49    7.02
   0  10  -8  153.18   11.24
   0  10  -9   63.73    8.79
   0  11   0    2.17    3.35
   0  11   0    4.49    5.27
   0  11   0   -3.99    4.38
   0  11  -1  394.35   17.39
   0  11   1  370.74   17.30
   0  11  -1  393.83   12.34
   0  11   1  385.81   12.36
   0  11   1  351.45   15.43
   0  11  -1  375.38   13.87
   0  11  -1  382.43   13.57
   0  11   1  357.67   13.63
   0  11  -2   27.67    7.07
   0  11  -2   21.49    5.10
   0  11   2   32.30    6.01
   0  11   2   33.15    4.55
   0  11  -2   33.74    4.42
   0  11  -2   37.32    5.41
   0  11   3  172.04   10.00
   0  11  -3  165.69    9.34
   0  11  -3  157.76    7.98
   0  11  -3  175.43   12.25
   0  11   3  167.78    8.60
   0  11  -4   34.62    5.93
   0  11   4   41.18    5.73
   0  11  -4   35.40    8.00
   0  11  -5   47.10    8.27
   0  11  -6   54.77    8.70
   0  11  -7   56.46    8.66
   0  11  -7   65.17   11.84
   0  11  -8   16.64    7.26
   0  11  -8    4.56   10.09
   0  11  -9   67.55    9.29
   0  12   0   19.68    7.29
   0  12   0   17.65    5.19
   0  12  -1   24.77    7.71
   0  12   1   15.85    5.45
   0  12  -1   24.30    5.42
   0  12  -2   21.09    7.61
   0  12  -2   23.84    5.55
   0  12   2   19.36    6.05
   0  12  -3  168.51   12.47
   0  12   3  134.67   11.85
   0  12   4   18.55    7.40
   0  12  -4   18.02    7.76
   0  12  -5    5.22    7.36
   0  12   5    2.25    6.81
   0  12   6  130.31   11.83
   0  12  -6  122.47   11.57
   0  12  -7  124.35   14.60
   0  12   7  114.03   11.16
   0  12  -7  116.08   11.49
   0  12  -8   26.72   11.17
   0  12  -8   44.51    9.19
   0  12   8   36.02    8.92
   0  13   0    0.61    6.97
   0  13   1  104.91   11.25
   0  13  -1  105.31   11.29
   0  13  -2   83.20   10.54
   0  13  -3    7.56    7.52
   0  13   3   18.51    8.50
   0  13   4   37.56    8.96
   0  13  -4   51.91    9.64
   0  13  -5   58.65   10.05
   0  13   5   69.03   10.29
   0  13   6   42.47    9.48
   0  13  -6   43.37    9.28
   0  13  -7   32.18   12.23
   0  13  -7   24.79    8.89
   0  13   7   20.93    8.61
   0  14   0    3.38    8.17
   0  14   1    7.98    7.75
   0  14  -1   25.12    8.36
   0  14  -2  132.68   12.91
   0  14   3   22.84    8.68
   0  14  -3   24.65    9.30
   0  14  -4   33.58    9.57
   0  14   5  226.79   15.82
   0  14  -5  245.75   16.09
   0  14   6   13.35    9.06
   0  14  -6   22.33    9.16
   0  15   0    3.67    8.61
   0  15  -1   61.14   10.76
   0  15   1   51.10   11.13
   0  15  -2    0.74    9.12
   0  15   3   -0.72    8.81
   0  15  -3    4.45    8.78
  -1 -15   4   37.47    8.09
   1 -15  -4   40.56    6.88
   1 -15  -4   25.73    6.86
  -1 -15   4   23.36    8.64
   1 -15  -3   -4.39    6.97
  -1 -15   3    1.05    6.73
  -1 -15   3    1.59    6.14
   1 -15  -3    6.39    6.83
  -1 -15   3   -8.91   10.00
   1 -15  -2   59.69    8.74
   1 -15  -2   67.35    8.56
  -1 -15   2   46.22    8.12
  -1 -15   2   63.35    8.47
  -1 -15   1   46.88    7.83
   1 -15  -1   53.90    8.14
   1 -15  -1   43.94    8.71
  -1 -15   1   49.11    7.49
  -1 -15   0  122.12    9.90
   1 -15   0  108.91   11.56
  -1 -15   0  118.96   10.04
   1 -15   0  136.17   11.12
  -1 -15  -1    9.06    5.35
   1 -15   1    6.10    6.71
   1 -15   1   14.11    7.99
  -1 -15  -1    7.48    6.00
   1 -15   2   16.67    7.56
  -1 -15  -2   15.40    6.57
   1 -15   2   23.20    8.40
  -1 -15  -2   10.72    5.91
   1 -15   3  128.37   12.07
   1 -15   3  103.10   11.78
  -1 -15  -3  105.76    9.00
  -1 -14   6   32.17    8.63
   1 -14  -6   31.75    6.32
   1 -14  -6   48.19    7.67
  -1 -14   6   31.84    7.49
  -1 -14   5  103.40   10.24
  -1 -14   5   95.68    9.83
   1 -14  -5   76.22    7.87
   1 -14  -5  102.40    9.02
  -1 -14   5  115.51   11.47
  -1 -14   4   37.60    7.77
  -1 -14   4   32.08    7.19
   1 -14  -4   25.21    6.81
  -1 -14   4   30.51    8.86
  -1 -14   3    7.88    6.46
  -1 -14   3   19.63    6.09
   1 -14  -3   14.15    6.26
  -1 -14   3   15.30    9.03
  -1 -14   2   64.73    7.99
  -1 -14   2   61.35    8.09
   1 -14  -2   56.79    8.34
   1 -14  -2   63.93    8.23
  -1 -14   1   16.81    5.97
   1 -14  -1   29.74    6.73
   1 -14  -1   20.48    7.35
  -1 -14   1   32.72    6.75
  -1 -14   0   17.94    5.63
   1 -14   0   17.84    7.18
   1 -14   0   19.95    6.81
  -1 -14   0   20.75    6.16
  -1 -14  -1    3.75    5.39
   1 -14   1   15.57    6.62
  -1 -14  -1    5.30    5.44
   1 -14   1    1.13    6.92
  -1 -14  -2   23.63    6.21
   1 -14   2   20.50    7.35
   1 -14   2   13.71    7.40
  -1 -14  -2   30.90    6.07
   1 -14   3  257.82   14.85
   1 -14   3  230.32   14.97
   1 -14   3  261.83   14.19
  -1 -14  -3  240.01   12.44
  -1 -14  -3  237.87   12.07
  -1 -14  -4   83.70    7.99
  -1 -14  -4   84.12    8.06
   1 -14   4   94.97   10.82
   1 -14   4   99.15   11.65
   1 -14   4   60.54    9.68
  -1 -14  -5   45.97    6.93
  -1 -14  -5   30.76    6.40
   1 -14   5   55.28    9.52
   1 -14   5   35.79    9.46
   1 -14   5   38.80    7.74
   1 -13  -7   25.33    6.55
   1 -13  -7   17.99    6.03
  -1 -13   7   26.57    8.36
  -1 -13   7   26.16   10.31
  -1 -13   7   36.78    6.55
   1 -13  -7   21.69    5.11
   1 -13  -6  148.55   10.04
   1 -13  -6  135.68    9.44
  -1 -13   6  124.92   11.12
  -1 -13   6  138.10   12.96
  -1 -13   6  140.84   11.01
   1 -13  -6  142.87    8.92
   1 -13  -5   55.19    7.43
  -1 -13   5   57.65    8.05
  -1 -13   5   63.42    8.92
  -1 -13   5   51.99    9.64
  -1 -13   5   51.99    8.91
  -1 -13   4   27.07    7.00
  -1 -13   4   28.22    6.75
   1 -13  -4   31.04    6.22
  -1 -13   4   32.02    8.73
  -1 -13   3   71.03    8.26
  -1 -13   3   69.87    7.74
   1 -13  -3   64.64    7.59
  -1 -13   3   59.16   10.26
   1 -13  -2   15.84    6.18
  -1 -13   2   12.53    5.77
  -1 -13   2   19.44    5.82
   1 -13  -2   28.30    6.40
   1 -13  -1  265.98   14.04
  -1 -13   1  272.80   12.97
   1 -13  -1  279.20   13.73
  -1 -13   1  276.38   13.12
  -1 -13   0   26.08    5.55
  -1 -13   0    8.58    5.45
   1 -13   0   11.84    6.34
   1 -13   0    8.30    6.10
  -1 -13  -1   20.89    5.55
   1 -13   1   31.62    7.47
   1 -13   1   42.42    7.40
  -1 -13  -1   37.66    6.18
  -1 -13  -2   34.70    5.90
   1 -13   2   35.37    7.23
   1 -13   2   39.95    8.07
  -1 -13  -2   34.87    6.02
  -1 -13  -3    4.61    5.06
   1 -13   3   11.98    6.11
  -1 -13  -3   17.07    5.44
   1 -13   3   14.89    6.79
   1 -13   3   11.61    7.29
   1 -13   3   14.87    4.28
   1 -13   4   74.59    5.92
  -1 -13  -4   79.42    7.27
  -1 -13  -4   87.53    7.70
   1 -13   4   79.48    9.64
   1 -13   4   59.54    9.49
   1 -13   4   72.74    9.55
   1 -13   5   52.75    4.97
  -1 -13  -5   50.25    6.36
  -1 -13  -5   49.95    6.87
   1 -13   5   59.59    9.27
   1 -13   5   54.48    9.82
   1 -13   5   55.12    8.19
  -1 -13  -6    5.74    5.34
  -1 -13  -6   12.69    5.75
   1 -13   6   15.73    8.17
   1 -13   6    0.72    8.43
   1 -13   6    3.96    4.98
  -1 -13  -6   11.56    4.62
  -1 -13  -7   29.27    5.99
  -1 -13  -7   16.86    5.24
   1 -13   7   10.60    7.88
   1 -13   7    9.33    9.08
   1 -13   7   16.36    4.62
   1 -12  -9   17.28    6.55
   1 -12  -9   22.42    6.52
  -1 -12   9   20.04    8.19
   1 -12  -9   18.75    5.26
  -1 -12   9   19.51    4.40
   1 -12  -8  108.03    9.20
   1 -12  -8  107.69    9.01
  -1 -12   8  108.40   11.24
  -1 -12   8  105.36   12.60
  -1 -12   8  134.17    8.41
   1 -12  -8  111.19    7.95
   1 -12  -7    5.69    5.73
   1 -12  -7   29.21    6.05
  -1 -12   7   10.71    7.01
  -1 -12   7    7.81    8.36
   1 -12  -7   11.87    4.77
  -1 -12   7   23.73    5.49
   1 -12  -6   47.06    6.56
   1 -12  -6   44.48    6.39
  -1 -12   6   43.91    7.83
  -1 -12   6   46.40    9.26
   1 -12  -6   43.41    5.68
  -1 -12   6   52.38    7.44
   1 -12  -5   67.31    7.26
  -1 -12   5   59.57    7.96
  -1 -12   5   73.10    8.74
  -1 -12   5   62.29    9.67
   1 -12  -5   64.95    6.22
  -1 -12   5   70.77    8.89
   1 -12  -4   43.39    6.32
  -1 -12   4   28.24    6.32
  -1 -12   4   45.05    7.20
  -1 -12   4   44.91    8.25
  -1 -12   4   44.01    8.61
   1 -12  -3  121.31    8.83
  -1 -12   3  119.46    9.10
  -1 -12   3  134.25   11.06
  -1 -12   3  130.48    9.53
  -1 -12   2  295.10   13.44
   1 -12  -2  295.55   13.42
  -1 -12   2  281.58   12.89
  -1 -12   2  295.20   14.88
  -1 -12   1  134.10    8.97
   1 -12  -1  114.04    9.03
  -1 -12   1  117.52    8.32
   1 -12  -1  114.09    9.41
   1 -12   0  214.34   12.20
  -1 -12   0  210.70   10.59
  -1 -12   0  199.22   10.62
   1 -12   0  192.37   11.33
   1 -12   0  226.16    9.93
  -1 -12  -1   16.56    4.95
   1 -12   1   15.10    5.93
   1 -12   1    5.65    6.09
  -1 -12  -1    6.55    4.46
   1 -12   1   13.25    4.38
  -1 -12  -2   33.40    5.47
   1 -12   2   19.80    5.77
  -1 -12  -2   25.04    5.18
   1 -12   2   30.99    7.02
   1 -12   2   23.96    6.94
   1 -12   2   36.05    4.75
  -1 -12  -3   35.10    5.51
   1 -12   3   35.80    6.50
  -1 -12  -3   29.05    5.52
   1 -12   3   31.23    6.97
   1 -12   3   31.06    7.54
   1 -12   3   40.08    4.88
  -1 -12  -4    8.67    4.64
  -1 -12  -4    7.26    4.83
   1 -12   4   -0.53    6.30
   1 -12   4   13.39    7.45
   1 -12   4   12.63    3.74
   1 -12   5   22.26    3.91
  -1 -12  -5   22.15    5.39
  -1 -12  -5   17.59    5.38
   1 -12   5   25.93    7.57
   1 -12   5   20.86    8.22
  -1 -12  -5   17.90    4.51
   1 -12   5   35.28    6.65
  -1 -12  -6  164.79    9.37
  -1 -12  -6  177.22   10.69
   1 -12   6  172.31   12.92
   1 -12   6  162.82   14.02
   1 -12   6  162.32    9.55
  -1 -12  -6  163.97    8.77
   1 -12   6  194.62    7.56
   1 -12   7    5.31    3.89
  -1 -12  -7   13.05    5.46
  -1 -12  -7   12.01    5.88
   1 -12   7    9.50    7.45
   1 -12   7   -5.19    8.56
  -1 -12  -7   12.31    4.21
  -1 -12  -8   63.27    7.33
  -1 -12  -8   54.77    8.12
   1 -12   8   63.18    9.69
   1 -12   8   51.45   11.31
  -1 -12  -8   66.84    6.50
   1 -11 -10   11.89    6.27
   1 -11 -10   11.60    6.49
  -1 -11  10   11.97    7.33
   1 -11 -10    7.05    4.84
  -1 -11  10    8.06    3.11
  -1 -11   9    3.44    3.42
   1 -11  -9    1.72    5.75
   1 -11  -9    7.47    6.01
  -1 -11   9    4.22    6.99
  -1 -11   9    1.56    8.83
   1 -11  -9    3.69    4.27
  -1 -11   8   11.92    4.34
   1 -11  -8   10.95    5.68
   1 -11  -8    9.26    5.55
  -1 -11   8    2.85    6.66
  -1 -11   8   12.35    8.26
   1 -11  -8    9.60    4.41
  -1 -11   7    0.37    4.35
   1 -11  -7    2.31    4.98
   1 -11  -7    3.10    4.97
  -1 -11   7   -2.14    6.53
  -1 -11   7    6.01    7.71
   1 -11  -7    2.76    3.91
  -1 -11   6   60.46    8.24
  -1 -11   6   60.57    7.63
   1 -11  -6   58.36    5.65
  -1 -11   6   66.20    9.21
   1 -11  -6   70.29    7.40
   1 -11  -5   29.03    5.64
  -1 -11   5   18.37    5.67
  -1 -11   5   26.40    6.62
  -1 -11   5   27.46    7.72
  -1 -11   5   19.31    6.71
   1 -11  -5   23.37    4.50
   1 -11  -4  210.68   10.85
  -1 -11   4  229.74   11.94
  -1 -11   4  212.67   11.93
  -1 -11   4  254.52   13.89
   1 -11  -4  217.85   10.32
   1 -11  -4  230.65   10.14
  -1 -11   4  220.47   13.78
   1 -11  -3  102.41    7.89
  -1 -11   3   99.64    7.87
  -1 -11   3  104.33    9.49
  -1 -11   3   83.91    7.96
  -1 -11   2   19.30    5.22
  -1 -11   2   17.44    5.88
  -1 -11   2    8.32    4.43
   1 -11  -2    8.15    5.09
   1 -11  -2   25.40    4.49
   1 -11  -1  170.15   10.46
  -1 -11   1  185.81   11.21
  -1 -11   1  175.75    9.60
  -1 -11   1  198.86   10.27
   1 -11  -1  172.61    9.98
   1 -11  -1  200.97    9.13
  -1 -11   0   30.00    6.01
   1 -11   0   33.03    6.36
  -1 -11   0   34.82    5.48
   1 -11   0   20.94    5.84
  -1 -11   0   27.12    4.98
   1 -11   0   36.62    4.94
   1 -11   1  135.91    9.60
  -1 -11  -1  123.40    7.99
   1 -11   1  131.52    8.31
  -1 -11  -1  121.76    7.88
   1 -11   1  115.68    9.01
   1 -11   1  122.26    6.93
   1 -11   2  199.08   12.05
  -1 -11  -2  205.79    9.96
   1 -11   2  192.13   10.50
   1 -11   2  208.71    8.72
  -1 -11  -2  192.88    9.55
   1 -11   2  188.27   11.29
  -1 -11  -3   11.26    4.52
  -1 -11  -3   13.23    4.67
   1 -11   3   14.20    5.48
   1 -11   3   11.51    6.16
   1 -11   3   19.17    6.94
   1 -11   3   13.87    3.71
   1 -11   4    7.36    3.47
  -1 -11  -4    2.62    4.04
  -1 -11  -4    3.07    4.56
   1 -11   4    8.42    6.30
   1 -11   4    3.24    6.30
  -1 -11  -4    1.28    3.49
  -1 -11  -5  148.29    8.32
  -1 -11  -5  131.92    8.78
   1 -11   5  128.59   11.86
   1 -11   5  116.72   10.33
   1 -11   5  124.66    9.25
  -1 -11  -5  132.11    7.41
   1 -11   5  126.17    6.23
   1 -11   6   -0.32    2.78
  -1 -11  -6    6.04    4.59
  -1 -11  -6   -0.41    5.10
   1 -11   6    5.10    6.42
   1 -11   6   -5.17    7.38
   1 -11   6    4.74    4.34
  -1 -11  -6    3.28    3.95
   1 -11   7    2.20    2.57
   1 -11   7    4.80    3.56
  -1 -11  -7    5.72    4.94
  -1 -11  -7    7.17    5.79
   1 -11   7    3.02    6.65
   1 -11   7   -2.11    8.08
  -1 -11  -7    2.30    3.87
   1 -11   8    2.40    2.45
  -1 -11  -8    5.74    5.24
  -1 -11  -8   -0.49    5.81
   1 -11   8    0.64    7.47
   1 -11   8    0.76    8.94
  -1 -11  -8    0.61    4.33
  -1 -11  -9   10.00    5.61
  -1 -11  -9   11.37    7.32
   1 -11   9    6.01    8.09
   1 -11   9   16.38    9.85
  -1 -11  -9    7.68    4.48
  -1 -10  10   36.16    3.73
   1 -10 -10   28.87    7.09
   1 -10 -10   38.36    8.03
  -1 -10  10   32.67    8.64
  -1 -10  10   41.40   10.43
   1 -10 -10   28.50    5.56
  -1 -10   9   12.47    3.47
   1 -10  -9   16.17    6.16
   1 -10  -9   19.22    6.77
  -1 -10   9   13.24    6.83
  -1 -10   9    8.97    8.60
   1 -10  -9   22.21    4.86
  -1 -10   8    0.81    3.58
   1 -10  -8    5.11    5.14
   1 -10  -8    7.41    5.68
  -1 -10   8    6.51    6.58
  -1 -10   8    8.97    7.97
   1 -10  -8    3.63    3.90
  -1 -10   7  527.34   20.19
  -1 -10   7  524.19   22.42
   1 -10  -7  491.41   18.17
   1 -10  -7  513.99   16.25
  -1 -10   7  506.79   16.93
   1 -10  -7  542.19   18.06
  -1 -10   6  114.71    9.49
   1 -10  -6  107.10    6.81
  -1 -10   6   87.39    7.74
  -1 -10   6   75.83    9.50
   1 -10  -6   85.17    7.26
   1 -10  -5  222.60   10.48
  -1 -10   5  190.65   10.68
  -1 -10   5  168.95   12.40
  -1 -10   5  196.71   11.45
   1 -10  -5  185.49    9.80
   1 -10  -5  203.06    9.08
  -1 -10   5  184.91   11.30
   1 -10  -4  191.20    9.11
   1 -10  -4  194.24    9.85
  -1 -10   4  182.54   10.38
  -1 -10   4  185.98   11.68
  -1 -10   4  205.25   11.20
   1 -10  -4  180.99    9.21
  -1 -10   4  197.53   12.37
   1 -10  -4  199.05    8.87
  -1 -10   3  129.72    8.85
  -1 -10   3  121.10    9.46
  -1 -10   3  124.71    8.29
   1 -10  -3  133.54    7.27
   1 -10  -3  126.86    7.98
  -1 -10   2  760.54   23.64
  -1 -10   2  734.65   21.67
   1 -10  -2  795.45   20.80
   1 -10  -2  778.08   22.12
  -1 -10   2  775.80   22.42
  -1 -10   1  102.75    8.34
  -1 -10   1   83.69    6.67
   1 -10  -1   88.66    6.08
  -1 -10   1   82.05    6.88
   1 -10  -1   97.87    7.36
   1 -10   0   74.21    7.07
   1 -10   0   72.40    6.92
  -1 -10   0   72.62    6.36
   1 -10   0   71.83    5.55
  -1 -10   0   74.40    6.20
   1 -10   1  259.17   12.36
   1 -10   1  249.52   10.97
  -1 -10  -1  256.36   10.65
   1 -10   1  257.29    9.63
  -1 -10  -1  251.02   10.43
   1 -10   1  256.85   12.28
   1 -10   2  398.01   16.17
  -1 -10  -2  379.14   13.62
   1 -10   2  392.14   14.82
   1 -10   2  428.42   12.70
  -1 -10  -2  405.42   13.54
   1 -10   2  416.22   16.19
   1 -10   3  157.51   10.34
  -1 -10  -3  155.29    7.94
   1 -10   3  152.20    9.44
  -1 -10  -3  151.35    8.63
   1 -10   3  142.90   10.53
   1 -10   3  174.72    7.30
  -1 -10  -3  142.32    7.15
  -1 -10  -4  177.66    8.56
  -1 -10  -4  167.82    9.41
   1 -10   4  164.85   11.68
   1 -10   4  197.36   11.70
  -1 -10  -4  176.61    9.02
   1 -10   4  174.01    7.16
  -1 -10  -4  174.93    7.98
  -1 -10  -5  169.00    8.68
  -1 -10  -5  172.08    9.84
   1 -10   5  166.55   11.35
   1 -10   5  184.15   12.47
   1 -10   5  171.23    9.80
  -1 -10  -5  144.16    7.64
   1 -10   5  166.85    6.76
   1 -10   6    5.45    2.68
  -1 -10  -6    5.08    4.11
  -1 -10  -6    8.55    5.27
   1 -10   6   15.49    7.04
   1 -10   6    9.79    7.88
   1 -10   6    7.62    4.09
  -1 -10  -6    6.10    3.69
   1 -10   7    2.26    3.04
   1 -10   7    0.95    2.29
  -1 -10  -7    4.87    4.65
  -1 -10  -7    7.35    5.67
   1 -10   7    4.01    6.55
   1 -10   7    6.68    8.27
  -1 -10  -7    3.77    3.89
   1 -10   8  110.47    4.15
  -1 -10  -8  106.40    8.30
  -1 -10  -8  102.35    9.83
   1 -10   8  114.15   11.10
   1 -10   8  110.90   12.48
  -1 -10  -8  100.21    7.09
   1 -10   8  103.20    4.42
  -1 -10  -9   44.86    6.96
  -1 -10  -9   32.52    8.26
   1 -10   9   40.30    8.44
   1 -10   9   40.93   10.64
  -1 -10  -9   38.59    5.76
   1 -10  10  127.49   14.21
  -1 -10 -10  135.45   10.14
  -1 -10 -10  127.51    8.58
   1  -9 -11   67.69    8.82
   1  -9 -11   63.82    6.98
  -1  -9  11   72.06   12.32
  -1  -9  11   65.71    3.66
  -1  -9  10   54.87    3.90
   1  -9 -10   25.29    7.01
   1  -9 -10   57.00    8.85
  -1  -9  10   42.92    8.63
  -1  -9  10   42.82   10.33
   1  -9 -10   44.60    6.08
  -1  -9   9   27.73    3.59
   1  -9  -9   23.16    6.50
   1  -9  -9   36.37    7.50
  -1  -9   9   30.05    7.34
  -1  -9   9   21.50    8.42
   1  -9  -9   30.86    5.08
   1  -9  -8  104.42    8.49
   1  -9  -8   97.42    9.05
  -1  -9   8  125.63   10.15
  -1  -9   8  106.12   11.05
  -1  -9   8  109.20    6.49
   1  -9  -8  108.39    7.26
  -1  -9   7   95.59    9.03
   1  -9  -7   85.67    6.35
  -1  -9   7   89.89    6.57
   1  -9  -7   88.90    8.35
  -1  -9   7   83.65   10.08
   1  -9  -7   94.80    7.64
   1  -9  -6  158.14    9.03
   1  -9  -6  141.63    7.59
  -1  -9   6  166.60    9.19
  -1  -9   6  159.37   10.48
  -1  -9   6  139.46   11.50
   1  -9  -6  138.31    8.96
   1  -9  -6  153.95    8.27
   1  -9  -5   -1.03    3.92
   1  -9  -5   -0.91    4.09
   1  -9  -5   -0.31    3.86
  -1  -9   5   -1.61    5.16
  -1  -9   5    0.48    5.93
   1  -9  -5   -0.24    3.37
  -1  -9   5    2.75    4.99
   1  -9  -4  203.61    8.72
   1  -9  -4  172.06    9.03
  -1  -9   4  189.57    9.84
  -1  -9   4  179.56   10.96
  -1  -9   4  182.19   10.12
   1  -9  -4  171.33    8.44
  -1  -9   4  214.71   11.87
   1  -9  -4  182.64    8.10
  -1  -9   3   51.31    5.98
  -1  -9   3   53.66    6.58
  -1  -9   3   49.88    5.51
   1  -9  -3   57.57    5.74
   1  -9  -3   57.24    4.82
  -1  -9   2  187.99   10.36
  -1  -9   2  181.40    8.92
  -1  -9   2  168.22    8.95
   1  -9  -2  186.38    8.99
  -1  -9   1  337.22   13.59
  -1  -9   1  366.61   12.62
   1  -9  -1  366.78   11.95
   1  -9  -1  363.24   13.17
  -1  -9   1  374.94   12.97
   1  -9   0  180.13    9.46
   1  -9   0  185.10    7.81
   1  -9   0  161.32    9.08
  -1  -9   0  183.46    8.46
  -1  -9   0  178.21    8.21
   1  -9   1  151.98    6.89
   1  -9   1  149.77    8.65
  -1  -9  -1  136.94    7.18
   1  -9   1  135.01    7.62
  -1  -9  -1  146.37    7.50
   1  -9   2  132.11    6.33
   1  -9   2  123.43    8.27
  -1  -9  -2  130.61    6.91
   1  -9   2  127.62    7.96
  -1  -9  -2  129.80    7.12
   1  -9   3  113.12    8.60
  -1  -9  -3  105.61    6.39
  -1  -9  -3   99.46    6.78
   1  -9   3   99.72    7.44
   1  -9   3  106.38    5.53
  -1  -9  -3  117.81    6.10
  -1  -9  -4 1591.84   36.81
  -1  -9  -4 1655.19   38.91
   1  -9   4 1570.22   40.96
  -1  -9  -4 1660.66   37.73
   1  -9   4 1637.32   34.86
  -1  -9  -4 1612.96   36.07
  -1  -9  -5  974.03   25.09
  -1  -9  -5  968.68   27.40
   1  -9   5  958.79   29.14
   1  -9   5  976.66   22.32
  -1  -9  -5 1029.87   25.73
   1  -9   5  990.18   26.02
  -1  -9  -5  999.52   24.25
  -1  -9  -6   21.27    4.76
  -1  -9  -6   24.03    6.27
   1  -9   6   29.10    6.96
   1  -9   6   21.15    2.90
  -1  -9  -6   23.50    4.05
   1  -9   6   22.44    3.89
  -1  -9  -7   91.42    7.39
  -1  -9  -7   85.93    9.38
   1  -9   7   95.96    9.50
   1  -9   7   82.48    3.84
   1  -9   7   70.44    4.38
  -1  -9  -7   86.05    6.35
  -1  -9  -8   33.60    6.32
  -1  -9  -8   41.34    8.14
   1  -9   8   46.16    8.07
  -1  -9  -8   37.15    5.16
   1  -9   8   40.22    2.31
   1  -9   8   35.40    2.44
   1  -9   9   24.43    7.92
  -1  -9  -9   24.73    4.85
  -1  -9  -9   22.40    6.07
   1  -9  10    7.68    7.88
  -1  -9 -10   20.09    6.70
  -1  -9 -10   13.34    4.97
   1  -8 -12   56.39    8.95
   1  -8 -12   68.96    7.42
   1  -8 -11   38.08    8.18
  -1  -8  11   44.44   10.42
  -1  -8  11   34.30    2.76
   1  -8 -11   44.88    6.31
   1  -8 -10    0.96    6.39
   1  -8 -10    8.83    4.56
  -1  -8  10    3.18    2.15
   1  -8  -9  103.90    9.06
   1  -8  -9  105.51    7.41
  -1  -8   9   97.35    9.59
  -1  -8   9  106.70   11.48
  -1  -8   9   93.77    5.12
  -1  -8   8  106.14    9.43
   1  -8  -8  100.16    7.03
  -1  -8   8  107.87    5.95
  -1  -8   8  110.05   11.17
   1  -8  -8  116.58    8.99
   1  -8  -7  683.77   20.88
   1  -8  -7  694.98   18.91
  -1  -8   7  629.66   18.19
  -1  -8   7  667.54   22.55
  -1  -8   7  690.80   24.55
   1  -8  -7  621.59   21.20
   1  -8  -7  663.13   18.74
   1  -8  -6  615.67   18.69
  -1  -8   6  602.53   17.98
   1  -8  -6  580.51   16.76
  -1  -8   6  569.07   20.12
  -1  -8   6  629.17   22.14
   1  -8  -6  592.18   19.02
   1  -8  -6  600.94   17.24
   1  -8  -5  714.07   20.53
  -1  -8   5  747.97   21.84
   1  -8  -5  732.08   19.18
  -1  -8   5  713.85   23.73
  -1  -8   5  749.51   22.49
   1  -8  -5  694.71   20.50
   1  -8  -5  763.15   19.79
   1  -8  -4  299.02   10.36
   1  -8  -4  259.88   10.63
  -1  -8   4  271.19   11.42
  -1  -8   4  276.54   12.96
  -1  -8   4  278.28   11.98
   1  -8  -4  263.03   10.40
  -1  -8   4  305.34   13.21
   1  -8  -4  281.42    9.76
   1  -8  -3   72.75    5.70
  -1  -8   3   72.05    5.83
  -1  -8   3   70.64    6.92
  -1  -8   3   73.29    6.18
   1  -8  -3   72.12    5.36
   1  -8  -3   73.56    4.89
  -1  -8   2  387.33   14.26
  -1  -8   2  394.36   12.93
   1  -8  -2  391.19   11.95
   1  -8  -2  384.96   12.87
  -1  -8   2  392.95   13.25
  -1  -8   1 1010.93   27.17
  -1  -8   1 1076.61   25.84
   1  -8  -1 1078.94   26.62
  -1  -8   1 1054.54   26.05
   1  -8  -1 1085.59   25.12
  -1  -8   0  611.71   16.85
   1  -8   0  599.72   16.91
   1  -8   0  615.12   18.08
  -1  -8   0  628.29   16.94
   1  -8   0  625.77   16.28
  -1  -8  -1  186.58    7.96
   1  -8   1  162.31    7.91
   1  -8   1  188.23    7.20
  -1  -8  -1  174.97    7.45
   1  -8   1  179.04    9.11
   1  -8   2    0.33    3.80
   1  -8   2   -3.30    3.24
  -1  -8  -2    3.07    3.21
  -1  -8  -2   -1.77    2.98
  -1  -8  -2    4.84    2.58
   1  -8   3    6.43    4.77
  -1  -8  -3    1.61    3.65
   1  -8   3    5.48    3.89
  -1  -8  -3    1.77    2.51
  -1  -8  -3    5.10    2.98
  -1  -8  -4  411.13   13.18
  -1  -8  -4  397.00   12.63
  -1  -8  -4  389.76   14.42
   1  -8   4  376.77   15.37
  -1  -8  -4  394.77   13.80
  -1  -8  -4  401.62   11.93
  -1  -8  -5   22.54    4.39
  -1  -8  -5   29.26    5.56
  -1  -8  -5   29.57    5.70
   1  -8   5   26.35    6.30
  -1  -8  -5   27.80    4.72
  -1  -8  -5   32.87    3.97
   1  -8   5   26.58    4.19
  -1  -8  -6   35.94    5.12
  -1  -8  -6   40.95    6.98
   1  -8   6   36.70    7.01
  -1  -8  -6   48.06    4.75
  -1  -8  -6   42.72    5.20
   1  -8   6   42.13    3.02
   1  -8   6   38.76    3.86
   1  -8   7  117.05   10.15
  -1  -8  -7  104.28    7.95
   1  -8   7  109.04    4.46
  -1  -8  -7  115.90    6.88
   1  -8   7  118.61    4.13
  -1  -8  -7  109.37    7.06
   1  -8   8   10.93    6.64
  -1  -8  -8   12.67    5.30
  -1  -8  -8    9.58    4.16
   1  -8   8    9.87    1.13
   1  -8   8   11.91    1.18
  -1  -8  -9   30.58    6.61
  -1  -8  -9   25.87    5.24
   1  -8   9   16.30    6.99
  -1  -8 -10   19.24    6.79
  -1  -8 -10   33.71    5.65
   1  -8  10   29.39    7.99
  -1  -8 -11   15.14    5.50
  -1  -8 -11   12.39    6.74
   1  -7 -12    8.12    7.28
  -1  -7  12    5.01    8.80
   1  -7 -12    8.60    5.68
   1  -7 -11  106.51    8.44
  -1  -7  11   92.52   12.48
   1  -7 -11   97.55   10.33
  -1  -7  11   92.57    4.05
   1  -7 -10   24.21    7.06
   1  -7 -10   37.01    5.79
  -1  -7  10   24.41    8.70
  -1  -7  10   23.14    2.66
   1  -7  -9   20.53    6.52
   1  -7  -9   24.12    5.21
  -1  -7   9   16.76    6.40
  -1  -7   9   30.15    8.55
  -1  -7   9   28.54    3.12
   1  -7  -9   20.01    4.21
   1  -7  -8    2.39    5.22
   1  -7  -8    6.26    3.96
  -1  -7   8    5.95    5.86
  -1  -7   8    7.08    7.28
   1  -7  -8   -0.91    6.28
   1  -7  -8    1.22    3.69
  -1  -7   8    3.51    2.54
   1  -7  -7  166.17    9.81
  -1  -7   7  188.05    7.74
   1  -7  -7  170.01    8.36
  -1  -7   7  192.91   11.21
   1  -7  -7  172.17   10.53
  -1  -7   7  175.11   12.30
   1  -7  -7  182.13    8.32
   1  -7  -6  136.81    8.34
  -1  -7   6  156.34    7.64
   1  -7  -6  150.97    7.30
  -1  -7   6  143.34    9.34
  -1  -7   6  137.36   10.24
   1  -7  -6  138.46    8.78
   1  -7  -6  144.32    7.22
   1  -7  -5   13.65    3.41
   1  -7  -5   10.84    4.15
   1  -7  -5   10.82    3.92
  -1  -7   5   18.56    4.63
  -1  -7   5   11.93    5.41
   1  -7  -5   11.08    2.93
  -1  -7   5   11.66    4.03
   1  -7  -4  264.33    9.54
   1  -7  -4  258.19   10.02
  -1  -7   4  263.14   10.59
  -1  -7   4  272.17   12.24
  -1  -7   4  267.28   11.20
   1  -7  -4  244.40    9.65
   1  -7  -4  255.52    8.95
  -1  -7   4  271.91   11.72
   1  -7  -3  566.30   16.46
  -1  -7   3  573.31   16.79
  -1  -7   3  579.94   17.34
  -1  -7   3  595.19   18.26
   1  -7  -3  606.94   15.94
  -1  -7   3  573.08   19.38
   1  -7  -3  614.87   15.60
  -1  -7   2  350.22   12.67
  -1  -7   2  343.04   11.40
  -1  -7   2  360.45   11.98
   1  -7  -2  340.48   11.48
   1  -7  -2  365.91   10.77
  -1  -7   1  468.86   14.84
   1  -7  -1  474.14   14.26
  -1  -7   1  497.14   14.06
  -1  -7   1  473.03   13.65
   1  -7   0 2744.63   55.79
   1  -7   0 2654.19   57.71
  -1  -7   0 2755.12   56.39
  -1  -7   0 2749.96   56.44
   1  -7   0 2707.83   56.58
   1  -7   1  470.29   12.92
   1  -7   1  447.26   14.12
   1  -7   1  463.29   15.08
  -1  -7  -1  468.80   13.39
  -1  -7  -2  564.97   16.01
   1  -7   2  561.37   16.55
  -1  -7  -2  575.62   14.48
  -1  -7  -2  571.28   15.00
   1  -7   2  579.04   17.51
  -1  -7  -3   70.88    4.74
   1  -7   3   68.93    5.79
  -1  -7  -3   79.01    5.88
   1  -7   3   69.72    6.24
  -1  -7  -3   65.26    5.21
  -1  -7  -3   77.63    4.34
  -1  -7  -4 1370.50   30.50
  -1  -7  -4 1280.84   29.82
  -1  -7  -4 1304.21   32.71
   1  -7   4 1273.02   33.31
  -1  -7  -4 1268.99   31.37
   1  -7   4 1288.18   30.95
  -1  -7  -4 1293.09   28.98
  -1  -7  -5  129.52    6.47
   1  -7   5  133.90    6.37
   1  -7   5  125.10    9.19
  -1  -7  -5  149.25    7.66
  -1  -7  -5  136.61    8.44
  -1  -7  -5  127.60    6.96
   1  -7   6   86.33    4.27
  -1  -7  -6  103.86    6.28
   1  -7   6   92.15    8.61
  -1  -7  -6  103.21    7.19
  -1  -7  -6  102.70    6.38
  -1  -7  -7   50.59    5.24
  -1  -7  -7   59.95    6.76
   1  -7   7   55.12    7.79
  -1  -7  -7   49.57    7.85
  -1  -7  -7   54.16    5.12
   1  -7   7   52.64    2.55
   1  -7   7   51.71    2.41
   1  -7   8  295.52   15.04
  -1  -7  -8  299.38   11.76
  -1  -7  -8  289.90   13.21
  -1  -7  -8  292.06   10.93
   1  -7   9   26.39    6.98
  -1  -7  -9   20.65    5.09
  -1  -7  -9   22.42    6.17
   1  -7  10   14.54    7.47
  -1  -7 -10    9.24    4.91
  -1  -7 -10   14.79    6.54
  -1  -7 -11   20.71    5.88
  -1  -7 -11   15.14    7.50
   1  -6 -12   49.61    7.43
  -1  -6  12   42.59    2.83
  -1  -6  12   40.88    9.93
   1  -6 -11   71.81    7.61
  -1  -6  11   72.01    3.68
  -1  -6  11   78.57   11.39
   1  -6 -10    2.92    4.70
  -1  -6  10    6.18    8.17
  -1  -6  10    4.08    2.11
   1  -6 -10    6.21    3.79
   1  -6  -9    1.41    3.48
  -1  -6   9    2.05    2.11
  -1  -6   9   -0.64    4.90
   1  -6  -9    7.75    6.05
   1  -6  -9    5.48    6.76
  -1  -6   9    1.88    7.57
   1  -6  -9    4.94    4.61
  -1  -6   8  219.30   10.44
   1  -6  -8  204.96   11.57
   1  -6  -8  195.50    9.54
  -1  -6   8  210.70   11.80
   1  -6  -8  222.13   12.34
  -1  -6   8  191.38   13.42
   1  -6  -8  212.25    8.82
  -1  -6   8  218.96    7.47
   1  -6  -7  107.87    6.21
  -1  -6   7  108.62    7.63
   1  -6  -7   92.51    7.74
   1  -6  -7  101.98    6.58
  -1  -6   7   99.52    8.18
  -1  -6   7   95.91    9.68
   1  -6  -7   93.56    8.35
  -1  -6   7  103.56    5.34
  -1  -6   6    7.04    4.34
   1  -6  -6    2.18    4.03
   1  -6  -6    7.33    2.92
  -1  -6   6    6.87    3.03
  -1  -6   6    1.07    4.32
   1  -6  -6    0.33    4.04
  -1  -6   6    1.76    4.65
   1  -6  -6    6.66    3.26
  -1  -6   5  340.77   12.40
   1  -6  -5  328.07   12.00
   1  -6  -5  333.71   10.59
  -1  -6   5  302.46   12.55
  -1  -6   5  308.79   13.55
   1  -6  -5  312.15   11.80
   1  -6  -5  320.27   10.43
  -1  -6   5  326.56   11.28
  -1  -6   4   82.88    6.15
   1  -6  -4   76.17    4.61
  -1  -6   4   91.50    6.59
   1  -6  -4   71.08    5.27
  -1  -6   4   81.79    5.66
  -1  -6   4   95.92    7.08
  -1  -6   4   78.86    6.19
   1  -6  -4   71.51    5.19
   1  -6  -4   75.17    4.91
  -1  -6   3  616.50   18.02
  -1  -6   3  613.86   17.28
  -1  -6   3  610.95   16.91
   1  -6  -3  593.11   15.32
  -1  -6   3  623.16   19.11
   1  -6  -3  627.35   16.57
  -1  -6   2  876.04   21.66
   1  -6  -2  900.29   21.48
  -1  -6   2  882.69   21.20
  -1  -6   2  901.04   22.60
   1  -6  -2  859.40   20.65
   1  -6  -2  851.26   20.21
  -1  -6   1  506.78   13.79
   1  -6  -1  524.28   13.71
  -1  -6   1  509.30   13.99
   1  -6  -1  530.64   14.51
   1  -6   0  429.44   11.50
  -1  -6   0  428.09   11.75
   1  -6   0  423.71   12.75
  -1  -6   0  418.37   11.83
   1  -6   0  422.23   11.94
  -1  -6  -1  816.05   19.02
   1  -6   1  813.91   21.06
  -1  -6  -1  821.75   18.66
   1  -6   1  806.38   20.03
  -1  -6  -1  823.89   19.79
   1  -6   2  561.53   16.70
  -1  -6  -2  567.79   14.31
  -1  -6  -2  582.16   13.91
  -1  -6  -2  548.78   15.68
   1  -6   2  543.37   15.71
  -1  -6  -3 1074.66   24.76
   1  -6   3 1135.10   28.04
  -1  -6  -3 1077.67   27.11
  -1  -6  -3 1058.90   25.98
  -1  -6  -3 1089.68   24.10
  -1  -6  -4  134.31    6.73
  -1  -6  -4  137.55    5.99
   1  -6   4  152.69    6.84
   1  -6   4  150.24    8.66
  -1  -6  -4  128.32    7.60
  -1  -6  -4  137.13    6.54
  -1  -6  -5   29.04    5.00
  -1  -6  -5   32.99    4.60
   1  -6   5   27.80    5.63
  -1  -6  -5   25.75    3.52
   1  -6   5   31.19    3.02
  -1  -6  -5   22.96    3.62
   1  -6   6  110.98    3.90
  -1  -6  -6  104.40    7.42
  -1  -6  -6  113.68    6.48
   1  -6   6  100.85    8.67
  -1  -6  -6   94.98    8.38
  -1  -6  -6  109.45    6.22
  -1  -6  -7   66.37    7.06
   1  -6   7   62.47    7.37
   1  -6   7   58.38    1.93
   1  -6   7   58.39    1.94
  -1  -6  -7   71.27    5.16
  -1  -6  -7   64.28    8.29
  -1  -6  -7   73.27    5.97
   1  -6   8   32.57    7.18
  -1  -6  -8   32.71    5.31
  -1  -6  -8   35.75    4.50
  -1  -6  -9  376.03   14.49
  -1  -6  -9  380.04   12.46
   1  -6   9  379.03   17.29
  -1  -6 -10   73.49    5.68
  -1  -6 -10   71.92    7.27
  -1  -6 -11   35.95    6.54
  -1  -6 -12   26.33    6.55
   1  -5 -13   30.26    7.05
  -1  -5  13   28.91    9.59
   1  -5 -12    8.62    5.75
  -1  -5  12    3.08    8.51
  -1  -5  12    9.88    2.24
   1  -5 -11  176.51   11.09
  -1  -5  11  207.11   15.04
   1  -5 -11  197.47    8.76
  -1  -5  11  177.76    6.05
  -1  -5  11  188.31    9.60
   1  -5 -10  101.41    8.43
  -1  -5  10  111.33   11.53
   1  -5 -10   98.85    6.44
  -1  -5  10  108.35    4.52
  -1  -5  10  111.33    7.65
   1  -5  -9  121.02    6.67
  -1  -5   9  130.27    5.10
   1  -5  -9  130.80   10.61
  -1  -5   9  125.48   11.58
   1  -5  -9  126.32    8.62
   1  -5  -8   65.12    4.92
  -1  -5   8   63.44    3.82
  -1  -5   8   63.67    6.09
  -1  -5   8   58.08    6.83
   1  -5  -8   46.03    7.34
  -1  -5   8   62.05    8.51
   1  -5  -8   65.77    6.34
  -1  -5   7  258.18   10.73
   1  -5  -7  274.06   10.73
  -1  -5   7  267.50   12.15
   1  -5  -7  260.76   12.34
  -1  -5   7  258.55   13.67
  -1  -5   7  268.15    8.52
   1  -5  -7  285.96    9.65
   1  -5  -6   81.52    5.04
  -1  -5   6   80.89    6.17
   1  -5  -6   87.74    6.80
   1  -5  -6   78.85    5.45
  -1  -5   6   82.91    6.82
  -1  -5   6   79.84    7.95
   1  -5  -6   84.93    7.03
  -1  -5   6   84.96    4.73
  -1  -5   5  282.86   10.89
   1  -5  -5  285.52   11.14
   1  -5  -5  300.92    9.91
  -1  -5   5  312.48   11.97
  -1  -5   5  307.65   12.85
  -1  -5   5  301.81    9.94
   1  -5  -5  296.57    9.56
  -1  -5   4  148.22    8.55
  -1  -5   4  144.00    7.57
   1  -5  -4  141.17    6.38
   1  -5  -4  170.72    6.54
  -1  -5   4  164.51    7.47
   1  -5  -4  158.81    7.54
   1  -5  -3 1009.41   23.79
   1  -5  -3 1019.18   23.00
  -1  -5   3 1003.81   25.18
  -1  -5   3  965.29   24.22
  -1  -5   3 1001.03   25.51
   1  -5  -3 1030.07   22.65
  -1  -5   3 1015.80   23.95
  -1  -5   2  441.65   13.79
  -1  -5   2  451.44   12.92
   1  -5  -2  476.35   12.85
  -1  -5   2  446.88   12.52
  -1  -5   2  501.67   13.96
   1  -5  -2  455.98   12.13
   1  -5  -2  465.27   11.90
   1  -5  -1  784.91   18.65
  -1  -5   1  767.45   18.19
   1  -5  -1  774.74   17.79
   1  -5  -1  746.18   17.83
  -1  -5   1  781.34   18.11
   1  -5   0 2636.46   54.27
  -1  -5   0 2622.15   52.80
   1  -5   0 2578.47   53.22
  -1  -5   0 2684.52   53.19
  -1  -5  -1  153.64    5.43
   1  -5   1  154.37    7.06
  -1  -5  -1  139.07    5.03
   1  -5   1  137.49    6.05
  -1  -5  -1  150.08    6.23
   1  -5   2  775.26   20.59
  -1  -5  -2  785.16   18.18
  -1  -5  -2  834.82   20.34
   1  -5   2  776.81   19.81
  -1  -5  -2  799.57   17.79
  -1  -5  -3  697.03   17.27
   1  -5   3  733.28   19.81
  -1  -5  -3  675.20   18.31
  -1  -5  -3  706.93   16.58
   1  -5   4  212.32    6.96
  -1  -5  -4  207.10    8.38
   1  -5   4  193.08    9.61
  -1  -5  -4  204.49    7.69
  -1  -5  -4  200.57    8.99
  -1  -5  -4  198.47    7.36
  -1  -5  -5   97.38    5.61
   1  -5   5   91.05    3.54
   1  -5   5   92.55    7.07
  -1  -5  -5   92.67    7.20
  -1  -5  -5  100.52    5.43
   1  -5   6  260.21   12.12
   1  -5   6  254.84    5.78
  -1  -5  -6  252.75   12.08
  -1  -5  -6  246.50    9.84
  -1  -5  -7    9.88    4.11
   1  -5   7    9.22    5.41
  -1  -5  -7    4.87    5.47
  -1  -5  -7    8.28    3.23
   1  -5   8  123.60    9.88
  -1  -5  -8  126.94    6.45
  -1  -5  -8  118.03   10.34
  -1  -5  -8  126.33    8.15
  -1  -5  -9  194.48   10.60
  -1  -5  -9  194.62    8.18
  -1  -5  -9  207.76   10.94
   1  -5   9  212.17   12.59
  -1  -5 -10  242.69    9.25
  -1  -5 -10  233.90   12.19
  -1  -5 -11   12.61    5.90
  -1  -5 -12    1.85    5.97
  -1  -4  13   60.00   11.27
   1  -4 -13   46.64    8.06
  -1  -4  12  329.44   12.15
  -1  -4  12  324.81   18.87
   1  -4 -12  311.61   11.42
  -1  -4  12  291.30    8.50
   1  -4 -12  279.99   14.67
   1  -4 -11   35.93    4.57
  -1  -4  11   41.98    3.17
  -1  -4  11   38.47    8.96
   1  -4 -11   50.90    7.29
  -1  -4  11   44.73    5.76
  -1  -4  10   51.42    3.38
   1  -4 -10   58.67    4.99
  -1  -4  10   55.30    9.50
   1  -4 -10   36.64    6.53
  -1  -4  10   48.94    5.67
   1  -4  -9   68.81    4.96
  -1  -4   9   64.91    3.64
  -1  -4   9   63.29    6.03
  -1  -4   9   66.12    9.21
   1  -4  -9   67.76    8.26
   1  -4  -9   64.76    6.84
   1  -4  -8  140.21    8.49
  -1  -4   8  154.73    8.08
  -1  -4   8  138.92   10.48
   1  -4  -8  133.88    9.90
   1  -4  -8  142.46    6.63
  -1  -4   8  143.80    5.35
   1  -4  -7  214.33    9.59
  -1  -4   7  225.38    9.43
  -1  -4   7  227.85   10.97
  -1  -4   7  232.58   12.43
   1  -4  -7  206.35   11.24
  -1  -4   7  224.79    7.08
   1  -4  -7  217.26    8.04
   1  -4  -6  133.35    7.02
  -1  -4   6  133.69    8.01
  -1  -4   6  142.12    7.34
  -1  -4   6  146.29    9.31
  -1  -4   6  129.85    5.38
   1  -4  -6  143.89    6.16
  -1  -4   5    2.93    2.34
   1  -4  -5    0.45    2.51
  -1  -4   5   -2.21    3.69
  -1  -4   5    2.38    3.64
  -1  -4   5    1.96    4.84
   1  -4  -5    2.91    2.83
   1  -4  -4  210.16    8.80
   1  -4  -4  217.25    7.59
  -1  -4   4  226.05    9.17
  -1  -4   4  218.25    9.82
  -1  -4   4  211.57    7.81
   1  -4  -4  223.75    7.44
   1  -4  -3 1534.46   32.97
   1  -4  -3 1483.43   31.64
  -1  -4   3 1517.81   34.08
  -1  -4   3 1527.99   33.24
   1  -4  -3 1505.09   31.58
  -1  -4   3 1454.28   33.38
  -1  -4   3 1488.69   32.61
   1  -4  -2  483.84   12.74
   1  -4  -2  499.36   12.19
  -1  -4   2  492.78   12.88
  -1  -4   2  483.86   13.40
   1  -4  -2  476.06   11.79
  -1  -4   2  480.67   12.39
  -1  -4   1 4755.17   92.43
   1  -4  -1 4767.21   92.94
  -1  -4   1 4703.65   94.08
   1  -4  -1 4750.35   92.10
  -1  -4   1 4740.51   92.27
   1  -4  -1 4767.37   92.18
   1  -4  -1 4688.24   92.03
   1  -4   0 1549.66   32.69
  -1  -4   0 1599.06   32.70
   1  -4   0 1563.96   33.59
  -1  -4   0 1610.20   32.28
  -1  -4  -1 1105.16   23.93
   1  -4   1 1063.99   23.64
  -1  -4  -1 1076.91   22.16
   1  -4   1 1042.08   22.12
  -1  -4  -1 1069.95   22.38
   1  -4   1 1038.36   24.34
   1  -4   2  127.40    5.87
   1  -4   2  119.98    6.42
  -1  -4  -2  124.51    5.08
  -1  -4  -2  127.88    5.69
  -1  -4  -2  129.28    4.59
   1  -4   3 1154.24   27.53
  -1  -4  -3 1158.41   24.87
  -1  -4  -3 1107.80   26.65
  -1  -4  -3 1116.74   25.52
  -1  -4  -4  181.63    7.13
  -1  -4  -4  183.65    6.83
  -1  -4  -4  165.23    8.33
   1  -4   4  174.10    5.06
   1  -4   4  180.91    8.76
  -1  -4  -5   11.30    2.77
   1  -4   5    6.53    0.94
   1  -4   5    4.72    3.51
  -1  -4  -5    4.46    3.91
  -1  -4  -5    7.28    3.23
   1  -4   6  537.28   18.02
  -1  -4  -6  548.44   14.38
   1  -4   6  528.96   19.33
  -1  -4  -6  569.90   18.89
  -1  -4  -6  539.92   16.32
  -1  -4  -7   49.97    4.05
   1  -4   7   49.58    6.37
   1  -4   7   40.27    7.57
  -1  -4  -7   49.09    7.28
  -1  -4  -7   45.73    5.69
   1  -4   8  227.61   12.10
  -1  -4  -8  231.63   10.90
  -1  -4  -8  230.68    8.39
  -1  -4  -8  229.45   13.55
   1  -4   8  233.69   14.07
  -1  -4  -8  231.21   11.26
  -1  -4  -9   20.47    5.78
   1  -4   9   37.59    8.65
  -1  -4  -9   40.27    4.13
  -1  -4  -9   38.25    6.44
  -1  -4 -10   32.57    3.96
   1  -4  10   37.75    9.24
  -1  -4 -10   31.33    6.60
   1  -4  11   98.99   12.47
  -1  -4 -11   86.90    8.75
   1  -4  12    4.73    8.84
  -1  -4 -12   20.06    7.13
  -1  -3  13  113.78   12.87
   1  -3 -13  121.55   10.93
   1  -3 -12    1.01    6.26
  -1  -3  12   -5.04    7.85
  -1  -3  12   -2.54    4.28
  -1  -3  12   -0.13    2.36
   1  -3 -12   -3.83    3.83
   1  -3 -11  105.17    9.46
   1  -3 -11  114.53    6.51
  -1  -3  11  114.92   11.80
  -1  -3  11  107.88    7.14
   1  -3 -10  167.08   10.94
  -1  -3  10  188.68    6.39
   1  -3 -10  172.20    7.55
   1  -3 -10  173.77   10.84
  -1  -3  10  148.11   12.36
   1  -3 -10  176.06   12.11
  -1  -3  10  183.55    8.87
  -1  -3   9  242.69   10.03
  -1  -3   9  230.61    7.38
   1  -3  -9  238.70    8.77
   1  -3  -9  246.27   12.14
   1  -3  -9  241.14   13.21
  -1  -3   9  247.14   14.01
  -1  -3   9  252.66   15.32
  -1  -3   8  214.41    9.14
   1  -3  -8  207.51    7.80
  -1  -3   8  206.58    6.65
   1  -3  -8  200.28   10.38
  -1  -3   8  226.53   12.79
  -1  -3   8  207.54   13.27
  -1  -3   7   76.35    8.54
   1  -3  -7   90.43    6.75
  -1  -3   7   84.74    8.05
  -1  -3   7   81.70    3.88
   1  -3  -7   83.07    4.66
  -1  -3   7   87.34    5.91
   1  -3  -6 2178.98   47.90
  -1  -3   6 2223.83   46.90
  -1  -3   6 2216.59   50.80
   1  -3  -6 2138.63   45.11
  -1  -3   6 2204.43   44.32
   1  -3  -5 2113.99   45.42
  -1  -3   5 2087.21   45.15
  -1  -3   5 2137.24   46.51
  -1  -3   5 2092.39   47.77
  -1  -3   5 2128.71   43.19
   1  -3  -5 2153.69   43.65
   1  -3  -4  699.69   16.98
  -1  -3   4  698.55   19.08
  -1  -3   4  682.53   17.89
  -1  -3   4  669.04   16.11
   1  -3  -4  673.04   15.98
  -1  -3   3  190.32    7.27
  -1  -3   3  197.91    7.97
   1  -3  -3  191.36    6.43
   1  -3  -3  202.38    6.27
   1  -3  -3  177.13    7.35
   1  -3  -2 2654.17   51.46
   1  -3  -2 2588.95   52.17
  -1  -3   2 2582.50   52.96
  -1  -3   2 2624.36   52.79
  -1  -3   2 2590.81   52.17
   1  -3  -2 2585.59   51.20
  -1  -3   2 2620.05   51.84
   1  -3  -2 2483.93   51.84
  -1  -3   1  437.60   11.89
   1  -3  -1  447.85   10.50
   1  -3  -1  449.07   10.41
  -1  -3   1  454.06   10.54
   1  -3  -1  457.53   10.41
  -1  -3   1  428.27   10.63
   1  -3  -1  436.97   11.02
  -1  -3   0 3558.41   70.03
   1  -3   0 3531.81   68.72
  -1  -3   0 3607.89   68.77
  -1  -3   0 3497.81   68.09
   1  -3   0 3434.89   69.47
  -1  -3  -1 2426.90   49.35
   1  -3   1 2390.78   48.71
  -1  -3  -1 2453.22   47.48
   1  -3   1 2372.31   49.33
  -1  -3  -1 2437.23   47.30
   1  -3   2  722.03   18.01
   1  -3   2  732.89   14.91
  -1  -3  -2  689.90   17.42
  -1  -3  -2  764.06   16.26
  -1  -3  -3 1856.25   38.28
   1  -3   3 1813.58   40.01
   1  -3   3 1867.62   40.94
  -1  -3  -3 1840.30   40.01
   1  -3   3 1821.41   36.04
   1  -3   4  346.71   12.11
  -1  -3  -4  347.74    9.61
  -1  -3  -4  328.11   12.11
   1  -3   4  334.58   12.98
  -1  -3  -4  341.42   10.86
   1  -3   5 1351.19   33.05
  -1  -3  -5 1386.24   29.39
   1  -3   5 1335.88   34.58
  -1  -3  -5 1362.59   33.72
  -1  -3  -5 1379.53   31.93
   1  -3   6  601.46   18.85
  -1  -3  -6  620.92   15.14
   1  -3   6  598.98   20.58
  -1  -3  -6  612.68   19.82
  -1  -3  -6  613.77   18.17
   1  -3   7  113.33    8.13
  -1  -3  -7   99.65    6.99
  -1  -3  -7  108.31    5.17
   1  -3   7  107.05    9.47
  -1  -3  -7  112.51    9.16
  -1  -3  -7  103.07    7.65
  -1  -3  -8  515.41   17.00
  -1  -3  -8  506.11   13.34
  -1  -3  -8  478.96   19.35
   1  -3   8  505.79   20.31
  -1  -3  -8  494.18   17.81
  -1  -3  -9  141.24    9.53
  -1  -3  -9  148.75   11.81
   1  -3   9  140.22   12.10
  -1  -3  -9  147.17   10.23
  -1  -3  -9  154.94    6.45
   1  -3  10   71.80    9.98
  -1  -3 -10   74.27    8.27
  -1  -3 -10   73.32    4.86
   1  -3  11   59.72   10.13
  -1  -3 -11   72.32    8.82
   1  -3  12    1.53    8.23
  -1  -3 -12    2.67    6.68
  -1  -2  13   -3.72    8.72
   1  -2 -13    1.15    7.01
  -1  -2  13   -2.27    4.24
   1  -2 -12  148.77   11.83
  -1  -2  12  156.51   13.55
  -1  -2  12  156.02    6.42
  -1  -2  12  175.65    8.49
   1  -2 -11  190.10   12.47
  -1  -2  11  199.49    9.01
  -1  -2  11  187.08   13.85
   1  -2 -11  179.28    8.03
  -1  -2  11  188.81    6.91
  -1  -2  10  166.45   13.63
   1  -2 -10  162.25   11.12
  -1  -2  10  152.90    8.00
   1  -2 -10  149.88   10.13
  -1  -2  10  178.08   12.52
   1  -2 -10  161.98   11.73
  -1  -2  10  149.11    5.93
   1  -2 -10  163.99    7.20
   1  -2  -9  130.17    9.73
  -1  -2   9  139.78    7.43
   1  -2  -9  145.21    9.08
  -1  -2   9  145.99   11.19
  -1  -2   9  151.19    5.69
   1  -2  -9  146.51    6.50
  -1  -2   8   19.53    6.91
   1  -2  -8   21.29    5.55
  -1  -2   8   23.94    6.39
   1  -2  -8   17.96    3.01
  -1  -2   8   21.32    2.53
  -1  -2   8   27.50    4.29
  -1  -2   7  492.37   19.27
   1  -2  -7  535.23   17.12
  -1  -2   7  521.07   18.46
  -1  -2   7  518.78   12.43
   1  -2  -7  503.01   13.30
  -1  -2   7  501.45   14.57
  -1  -2   6 1455.83   37.91
   1  -2  -6 1500.04   35.12
  -1  -2   6 1455.59   36.51
  -1  -2   6 1484.67   30.72
   1  -2  -6 1507.76   31.56
  -1  -2   6 1471.32   32.89
   1  -2  -5 1162.16   27.28
  -1  -2   5 1114.38   29.83
  -1  -2   5 1112.14   25.88
  -1  -2   5 1189.21   28.97
  -1  -2   5 1139.87   24.07
   1  -2  -5 1133.75   24.63
  -1  -2   4  550.30   14.67
  -1  -2   4  557.87   16.75
   1  -2  -4  546.25   14.44
  -1  -2   4  552.95   15.72
  -1  -2   4  529.43   12.68
   1  -2  -4  522.89   12.77
   1  -2  -3  932.73   20.78
  -1  -2   3  929.72   21.18
  -1  -2   3  941.87   22.00
   1  -2  -3  944.06   19.95
  -1  -2   3  894.65   22.79
  -1  -2   2 2216.79   45.88
   1  -2  -2 2142.02   45.55
   1  -2  -2 2299.33   44.83
  -1  -2   2 2297.58   45.86
  -1  -2   2 2265.82   45.39
  -1  -2   2 2278.62   44.98
   1  -2  -2 2298.85   44.64
   1  -2  -1 2717.97   52.73
  -1  -2   1 2688.92   54.02
  -1  -2   1 2773.37   53.39
  -1  -2   1 2737.15   52.79
   1  -2  -1 2638.46   52.57
  -1  -2   1 2684.16   54.90
  -1  -2   1 2683.49   52.65
   1  -2  -1 2719.69   52.58
   1  -2  -1 2785.31   53.32
  -1  -2   0   19.53    2.66
  -1  -2   0   20.11    1.29
   1  -2   0   20.32    2.28
   1  -2   0   19.14    1.71
  -1  -2   0   20.01    1.94
  -1  -2   0   18.76    1.21
   1  -2   1  231.41    7.06
  -1  -2  -1  239.25    5.75
  -1  -2  -1  225.47    6.74
   1  -2   1  229.44    7.04
   1  -2   2 2932.24   57.82
  -1  -2  -2 2858.67   56.49
  -1  -2  -2 2767.91   57.64
   1  -2   2 2864.48   58.17
   1  -2   3 8055.98  155.00
  -1  -2  -3 7941.90  155.35
   1  -2   3 7944.87  155.89
  -1  -2  -3 7888.06  154.09
   1  -2   4 1930.50   43.29
  -1  -2  -4 2020.20   40.32
   1  -2   4 1987.08   44.76
  -1  -2  -4 2011.47   44.31
  -1  -2  -4 1978.76   43.16
  -1  -2  -5 1469.22   33.49
   1  -2   5 1490.83   34.92
  -1  -2  -5 1510.03   31.02
   1  -2   5 1449.73   36.52
  -1  -2  -5 1493.55   35.99
  -1  -2  -5 1506.63   34.97
  -1  -2  -6  193.98    8.70
  -1  -2  -6  200.33    6.54
   1  -2   6  211.21   11.14
  -1  -2  -6  177.23    9.99
  -1  -2  -6  212.77    9.91
  -1  -2  -7  227.46   10.18
  -1  -2  -7  224.51    7.23
   1  -2   7  233.58   12.63
  -1  -2  -7  232.56   12.25
  -1  -2  -7  219.41   11.24
  -1  -2  -8  101.26    7.89
  -1  -2  -8  116.76    5.09
   1  -2   8  108.69    9.87
  -1  -2  -8  111.89    9.90
  -1  -2  -8  100.05    8.57
  -1  -2  -9  389.28   15.51
   1  -2   9  396.20   18.36
  -1  -2  -9  378.57   17.61
  -1  -2  -9  402.42   16.97
  -1  -2  -9  404.74   11.12
   1  -2  10   43.88    8.54
  -1  -2 -10   37.98    7.80
  -1  -2 -10   44.71    3.82
   1  -2  11   13.01    8.09
  -1  -2 -11   12.94    6.69
   1  -2  12   66.02   10.57
  -1  -2 -12   63.15    9.40
  -1  -2 -13   23.06    8.01
  -1  -1  13    7.84    7.91
   1  -1 -13   15.33    7.40
  -1  -1  13   10.81    4.17
  -1  -1  12  148.21   13.06
   1  -1 -12  127.02   11.43
  -1  -1  12  122.22    7.36
   1  -1 -11   20.49    7.20
  -1  -1  11   12.15    4.49
  -1  -1  11   13.46    7.41
  -1  -1  11   17.48    3.19
   1  -1 -11    9.23    3.54
  -1  -1  10  362.58   19.01
   1  -1 -10  350.68   16.40
  -1  -1  10  352.72   12.01
   1  -1 -10  373.02   15.44
  -1  -1  10  331.81   16.71
  -1  -1  10  354.43   10.35
   1  -1 -10  343.22   11.07
  -1  -1   9   63.40    9.50
   1  -1  -9   65.89    7.96
  -1  -1   9   69.56    5.50
   1  -1  -9   67.10    7.02
  -1  -1   9   68.51    8.45
   1  -1  -9   59.72    4.43
  -1  -1   9   76.70    4.24
   1  -1  -8  375.20   14.87
  -1  -1   8  360.46   16.76
  -1  -1   8  326.32   11.05
   1  -1  -8  337.62   13.26
  -1  -1   8  325.15   14.86
   1  -1  -8  313.96    9.81
  -1  -1   8  333.36    9.36
  -1  -1   7  331.56   15.30
   1  -1  -7  338.69   13.74
  -1  -1   7  339.05   13.90
  -1  -1   7  329.83    9.03
   1  -1  -7  332.01    9.55
  -1  -1   7  323.98   10.64
   1  -1  -6  552.63   17.45
  -1  -1   6  561.02   19.38
  -1  -1   6  526.21   17.62
  -1  -1   6  567.37   13.05
   1  -1  -6  545.54   13.49
  -1  -1   6  541.47   14.65
   1  -1  -5 1336.47   31.59
  -1  -1   5 1322.74   33.46
  -1  -1   5 1358.71   32.17
  -1  -1   5 1359.47   27.73
   1  -1  -5 1330.83   28.15
  -1  -1   5 1333.95   29.33
   1  -1  -4 1572.72   32.18
  -1  -1   4 1588.21   36.52
   1  -1  -4 1588.09   34.72
  -1  -1   4 1562.22   35.11
   1  -1  -3 1098.47   22.61
  -1  -1   3 1123.67   24.69
   1  -1  -3 1070.41   24.05
  -1  -1   3 1059.58   25.45
  -1  -1   2 2765.20   54.84
  -1  -1   2 2813.60   55.74
   1  -1  -2 2836.29   54.54
  -1  -1   2 2743.65   54.93
  -1  -1   2 2779.82   54.33
   1  -1  -2 2733.52   53.89
   1  -1  -1   78.90    2.63
   1  -1  -1   76.08    3.08
  -1  -1   1   72.55    3.35
  -1  -1   1   77.04    2.76
   1  -1  -1   75.58    2.43
  -1  -1   1   82.54    3.36
   1  -1  -1   74.13    2.37
  -1  -1   1   82.23    2.36
   1  -1   0 3960.55   75.96
  -1  -1   0 4038.74   76.84
   1  -1   0 4095.57   76.65
   1  -1   0 3988.44   76.24
   1  -1   0 3947.18   76.20
  -1  -1   0 3909.76   77.85
   1  -1   1  914.58   20.43
  -1  -1  -1 1004.37   20.05
  -1  -1  -1  961.23   20.53
   1  -1   1  980.59   20.76
  -1  -1  -1  977.27   19.56
   1  -1   2  575.61   14.01
  -1  -1  -2  574.78   13.23
   1  -1   2  581.28   14.69
  -1  -1  -2  594.19   14.63
  -1  -1  -2  579.89   14.17
  -1  -1  -3  300.05    9.73
  -1  -1  -3  299.52    7.21
  -1  -1  -3  284.24    8.66
   1  -1   3  274.51    9.08
   1  -1   3  288.11   10.02
  -1  -1  -3  292.90   10.08
   1  -1   3  280.50   10.80
  -1  -1  -4  557.76   14.79
  -1  -1  -4  553.45   12.37
   1  -1   4  554.72   16.64
  -1  -1  -4  528.16   16.20
  -1  -1  -4  549.48   16.18
  -1  -1  -5  345.64   12.70
   1  -1   5  328.36    7.76
  -1  -1  -5  315.72   11.01
  -1  -1  -5  340.26   13.08
   1  -1   5  307.83   12.62
  -1  -1  -5  335.39    8.41
  -1  -1  -6  358.78   14.06
   1  -1   6  365.08    8.50
  -1  -1  -6  347.62   12.41
  -1  -1  -6  351.31   14.18
   1  -1   6  365.78   14.43
  -1  -1  -6  339.41    8.98
  -1  -1  -7  306.92   13.74
   1  -1   7  310.60    7.71
  -1  -1  -7  316.75   12.30
   1  -1   7  316.29   14.47
  -1  -1  -7  320.10   14.21
  -1  -1  -7  304.17    8.42
  -1  -1  -8   99.45    7.84
  -1  -1  -8   81.85    4.10
   1  -1   8   99.58    9.19
  -1  -1  -8   87.30    8.71
  -1  -1  -8  100.91    9.17
  -1  -1  -9  214.96   11.58
  -1  -1  -9  251.57   14.30
   1  -1   9  226.47   13.51
  -1  -1  -9  234.67    7.42
  -1  -1  -9  207.41   12.88
   1  -1  10  765.50   27.26
  -1  -1 -10  751.25   18.02
  -1  -1 -10  793.96   26.88
   1  -1  11   40.85    9.47
  -1  -1 -11   78.26   10.11
   1  -1  12   42.91    9.11
  -1  -1 -12   32.40    8.59
   1  -1  13   -1.49    7.80
  -1  -1 -13    1.30    7.87
  -1   0  14   -6.47    7.75
  -1   0  13    8.18    7.60
  -1   0  13    7.84    4.01
   1   0 -13   -1.32    7.72
  -1   0  12   34.61    8.42
  -1   0  12   29.67    4.91
   1   0 -12   41.22    8.81
  -1   0  11  138.69    6.46
   1   0 -11  146.35   11.83
  -1   0  11  137.76    7.46
  -1   0  11  152.88   12.07
   1   0 -11  129.79    6.72
  -1   0  10   19.51    4.30
   1   0 -10   25.20    6.53
   1   0 -10   19.05    7.57
  -1   0  10   21.90    8.98
  -1   0  10   10.20    6.68
   1   0 -10   16.59    3.42
  -1   0  10   11.78    3.11
  -1   0   9    7.07    3.63
   1   0  -9   -0.38    4.96
   1   0  -9    1.96    5.59
  -1   0   9    8.93    7.69
  -1   0   9    0.96    5.51
  -1   0   9    2.82    2.53
   1   0  -9    6.70    2.89
  -1   0   8   87.64    5.61
   1   0  -8  105.11    7.69
  -1   0   8   90.25    9.78
   1   0  -8   86.10    8.14
  -1   0   8   87.68    8.12
  -1   0   8   98.72    4.77
   1   0  -8   89.22    4.79
  -1   0   7  350.09   10.94
   1   0  -7  364.58   13.01
  -1   0   7  339.50   15.54
   1   0  -7  351.51   14.39
  -1   0   7  353.39   14.20
   1   0  -7  345.45    9.94
  -1   0   7  357.69    9.74
  -1   0   6  290.82    9.41
   1   0  -6  294.52   10.81
  -1   0   6  303.03   12.08
  -1   0   6  301.45    8.27
   1   0  -6  280.97    8.36
  -1   0   6  301.57   13.34
   1   0  -6  281.14   12.17
  -1   0   5  683.94   16.50
  -1   0   5  661.12   18.77
   1   0  -5  659.89   15.53
  -1   0   5  699.00   15.35
   1   0  -5  693.53   19.51
  -1   0   5  682.64   20.35
  -1   0   4 2457.57   50.38
   1   0  -4 2341.90   47.34
   1   0  -4 2396.29   50.75
  -1   0   4 2411.74   51.41
   1   0  -3 1483.34   29.16
  -1   0   3 1436.22   30.39
   1   0  -3 1345.94   30.17
   1   0  -3 1378.54   28.56
   1   0  -3 1411.51   30.78
  -1   0   3 1413.86   31.20
  -1   0   2 2045.65   40.29
   1   0  -2 2055.47   40.18
   1   0  -2 1996.76   40.38
  -1   0   2 2002.46   40.42
   1   0  -2 2003.61   39.75
  -1   0   2 2046.49   39.66
   1   0  -2 2010.74   40.79
  -1   0   2 2021.95   40.98
  -1   0   1 1051.40   21.08
   1   0  -1 1047.20   21.03
  -1   0   1 1030.76   20.74
   1   0  -1 1042.13   20.84
  -1   0   1 1020.26   20.60
   1   0  -1 1028.89   20.52
   1   0   0    0.76    0.95
  -1   0   0    1.96    0.96
  -1   0   0   -0.25    0.85
   1   0   0    1.39    1.01
  -1   0  -1  459.75   10.38
   1   0   1  469.15   10.40
  -1   0  -1  463.71   10.27
  -1   0  -1  474.16   11.25
  -1   0  -1  462.68   10.96
   1   0   1  465.44   10.91
  -1   0  -2   69.94    3.72
  -1   0  -2   74.15    4.61
   1   0   2   64.90    4.18
  -1   0  -2   80.52    4.79
  -1   0  -3   70.68    4.39
  -1   0  -3   72.71    2.35
  -1   0  -3   67.89    5.17
   1   0   3   66.33    4.86
  -1   0  -3   65.01    5.34
  -1   0  -4 1954.09   42.43
  -1   0  -4 1978.57   38.82
   1   0   4 1998.14   44.05
  -1   0  -4 2014.23   44.15
  -1   0  -4 2038.14   44.87
  -1   0  -5 3189.61   67.12
   1   0   5 3102.74   59.41
  -1   0  -5 3150.55   64.49
   1   0   5 3123.75   66.39
  -1   0  -5 3002.76   66.07
  -1   0  -5 3038.33   59.85
  -1   0  -6    1.92    4.97
   1   0   6    1.42    1.50
  -1   0  -6   -0.27    3.53
   1   0   6    4.35    4.23
  -1   0  -6   -2.47    4.92
  -1   0  -6    2.26    1.36
  -1   0  -7    9.25    5.46
   1   0   7    5.43    1.69
  -1   0  -7    5.57    4.12
   1   0   7    5.02    4.43
  -1   0  -7    3.64    4.91
  -1   0  -7    7.32    1.70
  -1   0  -8   11.78    6.41
   1   0   8    5.16    1.76
  -1   0  -8   12.63    5.22
   1   0   8    9.46    6.00
  -1   0  -8    9.57    6.36
  -1   0  -8    4.88    1.96
  -1   0  -9  585.96   20.12
  -1   0  -9  623.41   22.61
   1   0   9  615.69   22.52
   1   0   9  622.12   24.27
  -1   0  -9  616.57   23.23
  -1   0  -9  591.52   14.31
   1   0  10   20.39    6.83
  -1   0 -10    4.69    7.11
  -1   0 -10   14.69    2.71
   1   0  11   19.62    7.64
  -1   0 -11   24.72    8.46
   1   0  12   17.60    8.02
  -1   0 -12    6.06    7.80
   1   0  13  166.78   14.23
  -1   0 -13  179.33   14.85
  -1   1  13   14.28    7.64
   1   1 -13   14.21    8.48
  -1   1  13   13.30    4.25
  -1   1  12  137.07   11.97
   1   1 -12  113.52   12.37
  -1   1  12  127.55    7.35
   1   1 -11    5.62    7.51
  -1   1  11   16.49    4.34
  -1   1  11    8.45    6.49
   1   1 -11   19.75    3.85
  -1   1  10  343.57   10.93
   1   1 -10  356.50   17.37
  -1   1  10  361.37   19.09
  -1   1  10  356.44   11.90
   1   1 -10  364.01   15.49
  -1   1  10  311.81   15.93
   1   1 -10  333.88   10.97
  -1   1   9   60.40    4.46
   1   1  -9   76.64    9.19
  -1   1   9   66.42    9.91
  -1   1   9   65.22    5.36
   1   1  -9   60.37    7.03
  -1   1   9   61.18    7.94
   1   1  -9   64.35    4.58
  -1   1   8  338.68   10.22
  -1   1   8  338.47   16.23
   1   1  -8  321.97   15.27
  -1   1   8  351.67   11.23
   1   1  -8  358.22   13.84
  -1   1   8  330.01   14.40
   1   1  -8  337.77   10.22
  -1   1   7  328.86    9.71
  -1   1   7  377.63   15.63
   1   1  -7  363.42   15.00
  -1   1   7  339.32   10.69
   1   1  -7  340.03   12.87
  -1   1   7  340.50   13.71
   1   1  -7  333.12    9.88
  -1   1   6  557.09   13.57
  -1   1   6  534.42   18.45
   1   1  -6  511.83   18.17
   1   1  -6  569.97   14.31
  -1   1   6  559.36   14.40
   1   1  -6  558.65   16.34
  -1   1   6  556.08   17.24
   1   1  -6  523.75   13.48
  -1   1   5 1325.79   28.28
   1   1  -5 1370.05   33.25
  -1   1   5 1412.92   33.26
   1   1  -5 1353.81   29.19
  -1   1   5 1348.57   29.06
   1   1  -5 1342.73   30.96
  -1   1   5 1366.90   31.77
   1   1  -5 1344.67   28.49
  -1   1   4 1613.90   35.81
   1   1  -4 1605.66   36.48
   1   1  -4 1583.49   33.34
   1   1  -4 1581.35   34.50
   1   1  -4 1571.56   35.01
  -1   1   4 1606.66   34.93
   1   1  -4 1582.09   32.65
  -1   1   3 1095.17   22.50
   1   1  -3 1094.75   25.46
  -1   1   3 1106.01   24.69
   1   1  -3 1086.82   23.44
   1   1  -3 1096.23   24.35
   1   1  -3 1074.72   23.86
  -1   1   3 1116.66   24.08
   1   1  -3 1052.80   22.85
  -1   1   2 2868.27   53.88
   1   1  -2 2654.61   54.73
   1   1  -2 2705.43   55.65
  -1   1   2 2732.37   54.72
   1   1  -2 2775.63   54.51
   1   1  -2 2819.67   54.78
  -1   1   2 2766.01   54.27
   1   1  -2 2782.14   54.49
  -1   1   1   81.19    2.55
   1   1  -1   76.40    3.35
  -1   1   1   69.06    2.96
  -1   1   1   81.18    2.56
   1   1  -1   73.81    3.13
   1   1  -1   74.94    2.56
   1   1  -1   74.90    2.72
   1   1  -1   76.81    3.51
   1   1  -1   76.88    2.27
  -1   1   0 4067.27   77.46
   1   1   0 4018.41   77.74
  -1   1   0 4032.57   77.03
  -1   1   0 3984.69   77.03
  -1   1   0 4069.41   76.84
  -1   1  -1  946.56   20.48
   1   1   1  968.53   20.22
  -1   1  -1  972.12   20.32
  -1   1  -2  568.74   15.27
   1   1   2  562.49   13.73
  -1   1  -2  555.31   14.18
  -1   1  -2  560.49   11.60
  -1   1  -2  543.81   13.58
  -1   1  -3  291.99   11.06
  -1   1  -3  285.68    9.31
  -1   1  -3  292.26   10.07
   1   1   3  285.48    9.68
  -1   1  -3  293.67    6.66
  -1   1  -4  590.45   17.97
  -1   1  -4  531.50   11.17
  -1   1  -4  561.80   15.39
  -1   1  -4  546.74   16.39
   1   1   4  533.79   15.92
  -1   1  -4  564.54   11.62
  -1   1  -5  334.40   13.80
  -1   1  -5  313.44    7.40
  -1   1  -5  328.84   11.77
  -1   1  -5  332.26   12.91
   1   1   5  349.62   12.74
   1   1   5  339.11    7.80
  -1   1  -6  349.78   15.06
  -1   1  -6  345.77    8.12
  -1   1  -6  357.98   12.67
   1   1   6  346.96   13.54
  -1   1  -6  335.52   13.77
   1   1   6  339.54    8.33
  -1   1  -7  317.53   14.99
   1   1   7  294.75   14.95
   1   1   7  309.86    7.91
  -1   1  -7  297.54   12.46
   1   1   7  316.91   13.71
  -1   1  -7  335.64   14.23
  -1   1  -7  311.99    7.85
  -1   1  -8   93.19   10.05
   1   1   8   96.53   10.14
   1   1   8   91.10    3.74
  -1   1  -8   98.15    7.95
  -1   1  -8   97.87    8.85
   1   1   8  106.60    8.83
  -1   1  -8   93.31    3.92
   1   1   9  220.48   14.63
  -1   1  -9  214.72   14.28
   1   1   9  205.18    5.76
  -1   1  -9  233.70   12.15
  -1   1  -9  214.71   13.20
   1   1   9  252.83   13.51
  -1   1  -9  215.53    6.63
  -1   1 -10  756.24   17.41
  -1   1 -10  756.96   27.83
   1   1  11   93.44   10.34
  -1   1 -11   65.25   10.18
   1   1  12   25.33    8.45
  -1   1 -12   32.34    9.57
   1   1  13    0.69    7.83
  -1   1 -13   -3.75    9.52
  -1   2  13    0.48    4.21
  -1   2  13    5.68    6.59
   1   2 -13    3.75    8.45
  -1   2  12  173.45   12.74
   1   2 -12  185.06   14.75
  -1   2  12  165.33    8.34
   1   2 -11  191.60   14.61
  -1   2  11  193.69    8.87
  -1   2  11  185.33   12.23
   1   2 -11  176.71    8.20
   1   2 -10  153.02   12.47
  -1   2  10  161.77    7.88
   1   2 -10  145.53   10.23
  -1   2  10  158.09   11.06
   1   2 -10  144.71    7.12
  -1   2   9  142.56    6.72
  -1   2   9  136.56    7.24
   1   2  -9  140.57   11.69
  -1   2   9  142.21   12.10
   1   2  -9  164.97   10.20
  -1   2   9  129.80    9.74
   1   2  -9  143.10    6.70
  -1   2   8   25.80    4.03
   1   2  -8   24.47    3.71
   1   2  -8   16.17    5.17
  -1   2   8   29.22    3.49
   1   2  -8   26.32    3.44
  -1   2   8   25.45    5.62
  -1   2   8   25.61    7.26
   1   2  -8   32.32    6.94
   1   2  -7  541.60   14.52
  -1   2   7  526.70   14.26
   1   2  -7  525.03   19.61
  -1   2   7  517.48   18.98
  -1   2   7  496.93   13.66
   1   2  -7  532.83   17.00
  -1   2   7  520.79   17.16
   1   2  -7  509.53   13.76
   1   2  -6 1498.43   32.56
  -1   2   6 1496.94   36.66
   1   2  -6 1375.17   37.32
  -1   2   6 1450.80   31.58
   1   2  -6 1440.35   35.19
   1   2  -6 1494.96   34.74
  -1   2   6 1510.13   35.20
   1   2  -6 1485.90   31.78
   1   2  -5 1136.78   25.97
   1   2  -5 1144.01   27.86
   1   2  -5 1129.48   27.40
   1   2  -5 1142.67   30.05
  -1   2   5 1163.53   28.87
  -1   2   5 1163.11   27.56
   1   2  -5 1145.81   25.23
   1   2  -4  520.63   13.84
  -1   2   4  525.04   15.25
   1   2  -4  535.95   16.72
   1   2  -4  540.75   14.89
   1   2  -4  538.41   14.59
  -1   2   4  529.00   14.28
   1   2  -4  534.18   13.31
   1   2  -3  905.70   20.75
  -1   2   3  900.60   21.03
   1   2  -3  897.20   22.70
  -1   2   3  915.93   19.63
   1   2  -3  904.31   20.90
   1   2  -3  911.15   21.14
  -1   2   3  926.69   20.44
   1   2  -3  906.81   20.42
  -1   2   2 2157.20   44.16
   1   2  -2 2294.88   45.59
   1   2  -2 2277.01   46.41
  -1   2   2 2211.13   44.52
   1   2  -2 2206.10   45.08
   1   2  -2 2241.11   45.71
   1   2  -2 2290.24   44.23
   1   2  -1 2819.13   54.95
  -1   2   1 2783.98   53.58
  -1   2   1 2754.90   54.10
  -1   2   1 2730.86   53.37
   1   2  -1 2754.86   53.30
  -1   2   1 2701.52   53.58
  -1   2   0   22.16    2.29
   1   2   0   17.76    2.69
   1   2   0   15.87    2.40
  -1   2   0   20.01    1.81
  -1   2   0   20.45    1.59
  -1   2  -1  221.97    6.83
  -1   2  -1  231.88    6.96
  -1   2  -1  236.76    6.55
  -1   2  -2 2859.56   57.59
  -1   2  -2 2778.41   57.77
   1   2   2 2930.18   57.36
  -1   2  -2 2861.58   56.09
  -1   2  -3 7851.56  153.69
  -1   2  -3 7802.92  154.26
  -1   2  -3 7886.91  151.24
   1   2   3 8088.43  153.68
  -1   2  -3 7842.46  156.60
  -1   2  -4 1962.52   42.17
  -1   2  -4 1888.31   38.84
   1   2   4 1993.94   42.48
  -1   2  -4 1957.17   43.02
  -1   2  -4 1899.79   45.24
  -1   2  -5 1429.23   33.92
  -1   2  -5 1471.63   29.95
   1   2   5 1421.73   34.43
  -1   2  -5 1477.50   35.15
  -1   2  -5 1430.14   37.52
  -1   2  -6  192.15   11.68
   1   2   6  225.29   11.67
  -1   2  -6  197.66    5.99
  -1   2  -6  204.95    9.63
   1   2   6  181.19    9.64
  -1   2  -6  216.94   10.56
  -1   2  -6  193.11    5.13
  -1   2  -7  217.66   13.17
   1   2   7  229.41   12.89
   1   2   7  215.96    6.60
  -1   2  -7  224.15   10.80
   1   2   7  197.87   10.85
  -1   2  -7  204.35   11.56
  -1   2  -7  227.73    5.92
  -1   2  -8  115.55   10.94
   1   2   8  118.29   11.09
   1   2   8  107.50    4.56
  -1   2  -8  111.81    8.61
  -1   2  -8   96.07    9.10
   1   2   8  120.50    9.13
  -1   2  -8  108.32    3.96
   1   2   9  414.78   19.57
  -1   2  -9  426.71   19.93
   1   2   9  377.74    9.76
  -1   2  -9  430.32   16.52
   1   2   9  378.05   16.52
  -1   2  -9  380.66   16.97
  -1   2  -9  369.32    9.24
   1   2  10   40.79    2.78
  -1   2 -10   30.47    2.34
   1   2  10   39.63    7.64
  -1   2 -10   34.97    9.17
   1   2  11    3.51    6.13
  -1   2 -11   12.23    8.82
   1   2  12   56.59    9.09
  -1   2 -12   53.69   10.88
  -1   2 -13   27.64   10.02
  -1   3  13  131.00   11.89
   1   3 -13  148.68   14.66
  -1   3  12    0.77    4.24
  -1   3  12   -0.56    6.11
   1   3 -12   -0.75    8.15
  -1   3  11  110.92    7.10
  -1   3  11  106.59    9.65
   1   3 -11  118.55   12.33
   1   3 -11  119.41    7.03
  -1   3  10  169.34    8.31
  -1   3  10  162.96   11.18
   1   3 -10  171.99    8.05
   1   3  -9  258.28   15.42
   1   3  -9  240.69    9.51
  -1   3   9  239.18    9.48
   1   3  -9  236.89   12.42
  -1   3   9  248.01   12.45
   1   3  -9  242.40    9.28
  -1   3   8  210.13    8.41
  -1   3   8  205.67   12.75
   1   3  -8  223.86   13.85
  -1   3   8  225.23    8.78
   1   3  -8  226.33    9.07
   1   3  -8  220.23   11.21
  -1   3   8  218.55   10.89
   1   3  -8  225.30    8.63
  -1   3   7   91.59    5.27
  -1   3   7   81.39    8.11
   1   3  -7   76.96    8.54
   1   3  -7   87.48    5.76
   1   3  -7   85.83    7.35
   1   3  -7   95.18    7.25
  -1   3   7   93.23    7.01
   1   3  -7   84.78    5.30
  -1   3   6 2196.51   45.46
  -1   3   6 2114.75   49.57
   1   3  -6 2211.01   52.49
   1   3  -6 2175.37   46.60
   1   3  -6 2172.02   48.84
   1   3  -6 2162.67   48.30
  -1   3   6 2158.57   48.15
   1   3  -6 2177.09   45.91
   1   3  -5 2149.38   49.96
  -1   3   5 2074.54   47.11
   1   3  -5 2138.59   45.27
   1   3  -5 2079.73   46.03
   1   3  -5 2109.73   46.53
  -1   3   5 2140.61   45.62
   1   3  -5 2109.93   44.59
  -1   3   4  652.23   17.82
   1   3  -4  661.73   17.40
   1   3  -4  651.65   17.78
  -1   3   4  696.37   17.04
   1   3  -4  698.01   17.33
   1   3  -3  197.10    7.61
  -1   3   3  188.94    7.04
   1   3  -3  192.61    7.53
   1   3  -3  193.57    7.80
  -1   3   3  209.85    6.48
   1   3  -2 2597.26   52.81
  -1   3   2 2558.04   52.17
  -1   3   2 2639.53   51.18
   1   3  -2 2567.80   51.95
  -1   3   2 2492.18   51.13
   1   3  -2 2571.61   50.98
   1   3  -1  438.06   12.06
  -1   3   1  459.80   10.67
  -1   3   1  444.39   10.31
  -1   3   1  431.90   11.06
   1   3  -1  435.47   10.33
  -1   3   1  438.08   10.67
  -1   3   0 3485.10   68.65
   1   3   0 3458.43   69.48
   1   3   0 3612.55   68.58
  -1   3   0 3442.98   67.85
  -1   3   0 3470.26   67.90
  -1   3  -1 2372.33   48.29
  -1   3  -1 2386.39   48.56
  -1   3  -1 2420.33   47.83
  -1   3  -2  720.01   17.72
  -1   3  -2  722.29   17.73
  -1   3  -2  738.85   17.16
  -1   3  -3 1816.34   38.35
  -1   3  -3 1835.90   40.04
  -1   3  -3 1817.28   40.35
   1   3   3 1912.05   39.80
  -1   3  -3 1900.51   39.33
  -1   3  -4  338.41   11.73
  -1   3  -4  347.59   14.50
  -1   3  -4  357.45   12.43
   1   3   4  351.46   11.66
  -1   3  -4  346.63    9.95
  -1   3  -5 1395.80   33.08
  -1   3  -5 1375.95   33.79
   1   3   5 1358.08   34.11
  -1   3  -5 1359.68   36.92
   1   3   5 1337.43   32.74
  -1   3  -5 1440.48   29.95
  -1   3  -6  619.44   19.42
  -1   3  -6  636.82   18.82
  -1   3  -6  598.45   22.25
   1   3   6  612.17   20.24
   1   3   6  579.08   18.37
  -1   3  -6  605.24   14.98
  -1   3  -7  119.76    9.19
  -1   3  -7  113.90    8.14
   1   3   7  107.71    9.50
   1   3   7  114.72    7.99
  -1   3  -7  104.23    4.94
  -1   3  -8  482.31   18.77
  -1   3  -8  499.21   17.82
  -1   3  -8  478.39   21.53
   1   3   8  496.27   20.54
   1   3   8  530.08   18.65
  -1   3  -8  500.96   12.50
   1   3   8  493.24   12.60
  -1   3  -9  149.01   10.55
  -1   3  -9  148.82   11.42
   1   3   9  165.89   10.87
   1   3   9  150.99    5.97
   1   3   9  152.65   13.18
  -1   3  -9  141.03   12.98
   1   3  10   61.72    3.94
  -1   3 -10   58.95   10.44
   1   3  11   73.09    8.71
  -1   3 -11   70.44   11.53
   1   3  12    1.81    6.28
  -1   3 -12    2.42    8.84
  -1   4  13   52.59    8.72
   1   4 -13   38.94   11.05
  -1   4  12  309.29   15.69
   1   4 -12  294.48   19.02
  -1   4  12  306.49   11.89
   1   4 -11   42.11   10.31
  -1   4  11   40.91    5.37
  -1   4  11   33.36    6.83
  -1   4  10   52.56    5.57
   1   4 -10   56.60    5.49
   1   4 -10   59.31   10.16
   1   4 -10   54.81    5.57
  -1   4  10   42.80    7.01
   1   4  -9   61.51    5.84
  -1   4   9   58.53    5.43
   1   4  -9   69.71    7.60
  -1   4   9   60.56    7.06
   1   4  -9   60.25    5.68
   1   4  -9   62.36   10.09
   1   4  -8  143.03   12.05
   1   4  -8  147.63    7.92
   1   4  -8  142.10    9.59
   1   4  -8  149.50    9.51
  -1   4   8  132.93    8.64
   1   4  -8  148.91    7.64
   1   4  -7  218.64   13.64
   1   4  -7  218.28    9.43
   1   4  -7  215.96   10.76
  -1   4   7  232.05   10.18
   1   4  -7  205.64    8.92
  -1   4   6  142.90    8.88
   1   4  -6  149.65    7.50
   1   4  -6  123.56    7.80
  -1   4   6  148.46    7.61
   1   4  -6  129.06    7.07
   1   4  -5    0.24    3.62
  -1   4   5    2.71    4.26
   1   4  -5    0.78    4.07
  -1   4   5   -0.22    2.94
   1   4  -4  220.47    9.09
  -1   4   4  201.73    8.64
   1   4  -4  229.27    9.19
   1   4  -3 1468.40   33.04
   1   4  -3 1476.60   33.79
  -1   4   3 1540.84   32.42
  -1   4   2  464.38   11.86
   1   4  -2  503.62   14.13
   1   4  -2  499.90   12.10
  -1   4   2  480.14   13.13
   1   4  -1 4601.14   93.69
  -1   4   1 4790.14   91.22
  -1   4   1 4775.78   91.79
   1   4  -1 4668.07   91.42
  -1   4   1 4618.20   92.21
   1   4   0 1544.93   33.99
  -1   4   0 1531.85   32.78
  -1   4   0 1553.86   31.98
  -1   4   0 1549.28   32.04
   1   4   0 1601.82   32.77
  -1   4  -1 1030.83   23.53
  -1   4  -1 1050.86   23.85
   1   4   1 1075.13   22.62
  -1   4  -1 1066.30   23.09
  -1   4  -2  126.31    6.30
  -1   4  -2  136.99    5.76
  -1   4  -2  144.30    6.52
  -1   4  -3 1138.28   26.99
   1   4   3 1155.19   26.33
  -1   4  -3 1135.09   27.09
  -1   4  -3 1117.83   25.86
  -1   4  -3 1147.84   26.06
  -1   4  -4  186.93    8.65
  -1   4  -4  184.19    8.74
   1   4   4  173.58    8.71
  -1   4  -4  186.13    7.49
  -1   4  -4  181.14    7.82
  -1   4  -4  198.28   11.27
  -1   4  -5    9.68    3.23
  -1   4  -5    1.95    5.58
   1   4   5    0.63    4.31
  -1   4  -5    8.71    3.96
  -1   4  -5    8.72    4.48
  -1   4  -5    9.39    3.56
   1   4   5    9.79    3.30
  -1   4  -6  567.12   18.04
  -1   4  -6  547.72   18.41
  -1   4  -6  547.28   21.91
   1   4   6  580.21   19.35
   1   4   6  560.70   17.82
  -1   4  -6  579.00   15.29
  -1   4  -7   47.79    4.32
   1   4   7   45.65    7.54
  -1   4  -7   53.76    8.90
  -1   4  -7   54.57    6.59
  -1   4  -7   54.67    7.29
   1   4   7   50.99    5.98
  -1   4  -8  241.68   11.99
  -1   4  -8  229.30   15.56
   1   4   8  213.61   13.83
  -1   4  -8  232.01   12.82
   1   4   8  217.33   11.61
  -1   4  -8  234.28    8.34
   1   4   9   35.35    6.36
  -1   4  -9   25.45    9.03
   1   4   9   31.54    8.98
   1   4   9   30.25    3.69
  -1   4  -9   35.29    3.87
   1   4  10   30.57    3.68
   1   4  10   24.50    6.16
  -1   4 -10   38.80   10.36
   1   4  11   80.75    4.71
   1   4  11   79.98    4.62
   1   4  11  101.08    9.55
  -1   4 -11   79.99   11.90
   1   4  12   23.17    7.45
  -1   4 -12   19.52    9.32
  -1   5  13   19.74    7.07
   1   5 -13   18.27   11.41
  -1   5  12   17.61    5.25
  -1   5  12   17.87    6.58
   1   5 -12   26.62   10.55
  -1   5  11  182.66   11.52
   1   5 -11  179.88   15.59
  -1   5  11  184.06    9.25
   1   5 -11  196.96    9.39
  -1   5  10   97.64    6.89
   1   5 -10  107.42    7.51
  -1   5  10  103.43    8.83
   1   5  -9  125.66    8.03
  -1   5   9  123.65    8.86
   1   5  -9  130.41    8.40
   1   5  -9  122.96    9.61
   1   5  -8   67.14    6.34
   1   5  -8   64.05    7.68
  -1   5   8   54.06    6.07
   1   5  -7  272.70   11.33
  -1   5   7  272.01   11.44
   1   5  -7  289.17   12.66
   1   5  -6   77.49    6.28
   1   5  -6   78.44    6.82
   1   5  -5  292.84   11.51
   1   5  -5  292.33   11.48
   1   5  -4  132.28    7.44
   1   5  -4  153.79    8.02
  -1   5   4  148.52    7.29
   1   5  -3 1000.50   24.04
  -1   5   3  986.16   22.98
   1   5  -3 1002.44   25.23
   1   5  -2  462.88   14.38
  -1   5   2  467.58   11.91
   1   5  -2  447.40   12.00
   1   5  -2  447.75   12.33
   1   5  -1  757.67   20.23
  -1   5   1  768.40   17.48
  -1   5   1  762.48   18.15
   1   5  -1  764.23   17.84
   1   5  -1  793.64   17.88
   1   5   0 2635.40   55.35
  -1   5   0 2584.05   53.56
   1   5   0 2666.79   52.34
   1   5   0 2615.81   53.57
  -1   5   0 2586.33   52.79
  -1   5   0 2628.26   52.59
   1   5   1  148.36    5.64
  -1   5  -1  155.66    6.62
   1   5   1  137.24    5.09
  -1   5  -1  139.40    5.82
  -1   5  -2  748.90   19.45
   1   5   2  738.59   18.14
  -1   5  -2  768.75   19.39
  -1   5  -2  796.84   19.96
  -1   5  -2  804.33   18.66
  -1   5  -3  707.93   19.02
   1   5   3  734.58   18.27
  -1   5  -3  689.86   18.92
  -1   5  -3  707.03   18.68
  -1   5  -3  712.93   18.01
  -1   5  -4  211.99    9.33
   1   5   4  206.70    9.10
  -1   5  -4  211.31    9.48
  -1   5  -4  203.39    8.59
  -1   5  -4  207.20    8.50
  -1   5  -5   91.71    6.90
   1   5   5   94.29    7.36
  -1   5  -5   90.96    9.19
  -1   5  -5   87.57    6.77
  -1   5  -5   90.99    5.94
  -1   5  -5  102.00    6.29
  -1   5  -6  257.01   11.52
  -1   5  -6  244.12   11.67
   1   5   6  242.76   12.16
  -1   5  -6  283.13   15.70
  -1   5  -6  259.54    9.85
  -1   5  -6  253.90   10.58
  -1   5  -7    6.97    3.74
  -1   5  -7   17.78    8.24
   1   5   7   12.38    6.05
  -1   5  -7   10.75    5.34
  -1   5  -7    5.49    5.46
   1   5   7    8.94    4.64
  -1   5  -7    7.75    4.22
  -1   5  -8  142.96    7.20
  -1   5  -8  140.53    9.70
  -1   5  -8  135.71   10.35
   1   5   8  142.05    9.50
  -1   5  -8  147.74    9.02
  -1   5  -8  117.91   12.54
   1   5   8  128.32   11.11
   1   5   9  232.93   12.26
  -1   5  -9  208.41    8.43
  -1   5  -9  221.55   16.24
   1   5   9  198.01   14.55
   1   5  10  266.35   13.87
  -1   5 -10  248.16    8.77
   1   5  10  252.07    8.96
  -1   5 -10  234.97   17.50
   1   5  11   20.59    3.96
   1   5  11    5.23    3.34
   1   5  11    7.44    6.02
  -1   5 -11   24.05   10.33
   1   5  12   -2.28    6.51
  -1   5 -12   -1.79   10.07
  -1   6  12   40.26    5.81
  -1   6  11   74.52    6.68
   1   6 -11   71.97    6.93
   1   6 -10   13.95    5.19
   1   6  -9    2.03    4.63
   1   6  -8  214.61   11.78
   1   6  -8  232.78   11.13
   1   6  -7   99.81    8.19
   1   6  -7  101.94    7.81
   1   6  -6    1.29    3.93
   1   6  -6   -0.33    4.36
   1   6  -5  297.07   11.79
   1   6  -5  313.51   12.60
   1   6  -4   79.57    6.17
   1   6  -4   72.91    6.74
   1   6  -4   82.67    5.87
   1   6  -3  641.31   19.00
   1   6  -3  622.73   16.80
   1   6  -2  871.87   23.57
  -1   6   2  840.35   20.07
   1   6  -2  888.72   20.46
   1   6  -2  885.92   20.91
   1   6  -1  496.69   16.05
   1   6  -1  523.85   12.83
  -1   6   1  516.92   13.13
   1   6  -1  509.11   13.62
  -1   6   1  517.92   14.19
   1   6  -1  523.98   13.45
   1   6   0  413.98   14.14
   1   6   0  446.71   11.49
   1   6   0  421.34   12.48
  -1   6   0  432.66   11.94
  -1   6   0  422.25   11.50
   1   6   0  421.75   10.82
   1   6   1  841.80   19.38
   1   6   1  820.84   18.58
  -1   6  -1  804.57   19.47
   1   6   2  575.61   14.53
  -1   6  -2  560.38   16.79
  -1   6  -2  579.06   15.11
  -1   6  -3 1077.47   26.57
   1   6   3 1083.38   25.38
  -1   6  -3 1070.85   26.61
  -1   6  -3 1055.04   26.83
  -1   6  -3 1117.81   25.63
  -1   6  -4  153.46    8.24
   1   6   4  149.11    7.65
  -1   6  -4  134.23    7.53
  -1   6  -4  130.93    6.89
  -1   6  -4  144.34    8.04
   1   6   5   22.21    5.38
  -1   6  -5   25.78    7.21
  -1   6  -5   24.56    4.78
  -1   6  -5   28.41    5.29
  -1   6  -5   27.99    4.76
  -1   6  -5   31.55    4.36
  -1   6  -6  119.29    8.47
  -1   6  -6  111.18    8.47
   1   6   6  132.08    9.26
  -1   6  -6  119.06   11.27
  -1   6  -6  126.38    7.54
  -1   6  -6  102.10    7.03
  -1   6  -7   65.57    6.13
  -1   6  -7   59.70    7.27
  -1   6  -7   59.38    7.53
  -1   6  -7   69.77    6.45
   1   6   7   68.35    8.62
  -1   6  -7   63.70   10.01
  -1   6  -8   28.53    7.23
   1   6   8   28.32    8.29
  -1   6  -8   19.78    9.48
  -1   6  -8   32.13    5.09
  -1   6  -9  376.58   21.34
  -1   6  -9  368.22   12.72
  -1   6 -10   79.43   12.50
  -1   6 -10   74.33    5.81
  -1   6 -11   47.16   11.84
   1   6  11   41.01    4.66
   1   6  11   43.80    5.21
  -1   6 -12   27.08   10.96
  -1   7  12   10.90    5.02
   1   7 -11   98.82    8.18
   1   7 -10   26.02    6.11
   1   7  -9   25.93    6.25
  -1   7   8    2.98    6.98
   1   7  -8    5.27    5.95
   1   7  -8   11.29    5.63
   1   7  -8    5.72    5.20
   1   7  -8    3.08    4.03
   1   7  -7  178.24   10.43
   1   7  -7  174.28   10.20
   1   7  -7  179.84   10.29
   1   7  -6  160.13    9.78
   1   7  -6  149.10    9.21
   1   7  -6  160.21    9.27
   1   7  -5   12.03    5.31
   1   7  -5   10.63    4.76
   1   7  -5   11.21    4.37
   1   7  -4  278.79   12.26
   1   7  -4  263.81   10.36
   1   7  -3  625.47   19.41
  -1   7   3  574.01   17.37
   1   7  -3  619.16   16.76
   1   7  -2  334.89   13.25
   1   7  -2  337.08   10.46
  -1   7   2  325.29   11.38
   1   7  -2  344.40   10.79
   1   7  -1  467.34   16.07
   1   7  -1  484.92   12.58
  -1   7   1  496.48   14.28
   1   7  -1  471.05   13.51
   1   7  -1  502.05   13.39
   1   7   0 2600.45   59.57
   1   7   0 2793.01   55.92
  -1   7   0 2749.09   56.46
   1   7   0 2753.24   57.49
  -1   7   0 2674.30   55.79
   1   7   0 2786.60   55.12
   1   7   1  480.86   13.07
   1   7   1  461.63   12.19
  -1   7  -1  461.34   12.85
  -1   7  -1  474.87   13.23
   1   7   2  566.16   15.75
   1   7   2  592.70   15.00
  -1   7  -2  556.95   17.71
  -1   7  -2  591.96   15.66
   1   7   3   77.89    5.27
  -1   7  -3   78.44    6.65
  -1   7  -3   68.01    5.09
  -1   7  -3   81.77    6.23
   1   7   4 1308.26   31.08
  -1   7  -4 1290.57   31.91
  -1   7  -4 1273.83   32.19
  -1   7  -4 1299.18   30.36
  -1   7  -5  132.99    8.56
   1   7   5  140.63    8.63
  -1   7  -5  128.28    8.35
  -1   7  -5  129.00    7.45
  -1   7  -5  143.12    8.88
  -1   7  -6   75.45   10.43
   1   7   6   91.43    8.49
  -1   7  -6   94.27    7.46
  -1   7  -6   80.01    6.49
  -1   7  -6   84.20    7.61
  -1   7  -6   92.50    7.81
   1   7   7   57.23    8.31
  -1   7  -7   50.82    6.16
  -1   7  -7   57.86    6.14
  -1   7  -7   49.51    7.48
  -1   7  -7   48.28    7.21
  -1   7  -8  293.67   18.68
   1   7   8  269.13   15.28
  -1   7  -8  306.82   12.36
  -1   7  -9   16.28    9.71
  -1   7  -9   18.11    5.20
  -1   7 -10    5.42    9.53
   1   7  10   17.13    5.00
  -1   7 -10   21.28    4.68
  -1   7 -11   27.28   11.12
   1   7  11   27.93    5.18
   1   8 -11   31.11    6.64
   1   8 -10    2.47    6.03
   1   8  -9  104.67    9.07
   1   8  -8  126.38    9.68
   1   8  -7  658.83   21.39
  -1   8   7  680.79   22.27
   1   8  -7  675.09   21.21
   1   8  -7  651.24   21.95
   1   8  -6  600.86   19.58
  -1   8   6  595.77   19.71
   1   8  -6  631.84   24.63
   1   8  -6  623.69   20.90
   1   8  -6  612.00   19.20
   1   8  -5  758.39   23.67
   1   8  -5  773.95   21.74
   1   8  -4  282.43   13.09
   1   8  -4  286.46   11.08
   1   8  -3   61.98    7.18
   1   8  -3   73.65    5.65
  -1   8   3   77.00    6.45
   1   8  -2  377.24   15.08
   1   8  -2  391.77   11.40
   1   8  -2  399.81   12.28
  -1   8   2  402.96   13.22
   1   8  -2  388.48   12.25
   1   8  -1 1059.63   29.44
   1   8  -1 1121.10   24.73
   1   8  -1 1038.15   26.00
  -1   8   1 1089.99   26.79
  -1   8   1 1137.12   26.67
   1   8  -1 1105.32   25.61
   1   8   0  577.15   19.56
   1   8   0  617.12   15.37
   1   8   0  666.15   18.14
  -1   8   0  606.43   16.83
   1   8   0  617.26   16.19
  -1   8   0  629.64   17.37
   1   8   1  177.13    6.80
  -1   8  -1  183.21    7.70
   1   8   1  187.91    7.68
  -1   8  -2   -2.44    4.58
   1   8   2   -0.18    2.77
  -1   8  -2    5.65    3.11
   1   8   2    2.95    3.64
   1   8   3    0.35    4.52
  -1   8  -3    2.10    4.65
   1   8   3    0.22    3.37
  -1   8  -3    0.67    3.02
   1   8   4  405.99   13.56
  -1   8  -4  373.27   14.75
   1   8   4  375.00   14.67
  -1   8  -4  370.88   12.62
  -1   8  -4  392.90   14.10
   1   8   5   30.05    5.94
  -1   8  -5   20.09    5.56
  -1   8  -5   27.52    4.62
  -1   8  -5   36.39    6.07
  -1   8  -6   39.20    9.41
   1   8   6   41.21    6.90
  -1   8  -6   37.95    6.26
  -1   8  -6   32.26    4.90
  -1   8  -6   42.29    6.83
  -1   8  -7  124.37    8.86
   1   8   7   96.62    9.70
  -1   8  -7  108.47   12.34
  -1   8  -8   14.48    5.60
  -1   8  -8    6.63    8.33
  -1   8  -9   43.95    6.36
   1   8   9   38.73    6.20
  -1   8  -9   23.22   10.49
   1   8  10   22.48    5.40
  -1   8 -10   25.48   11.47
  -1   8 -11   33.26   11.98
   1   9 -11   59.86   13.03
   1   9 -10   41.29    7.55
   1   9 -10   49.93   11.67
   1   9  -9   34.25    7.43
   1   9  -9   20.89    9.87
   1   9  -8   82.74    8.87
   1   9  -8  115.38   13.36
   1   9  -7   84.62    7.91
   1   9  -7   73.12   10.90
   1   9  -7   86.56    9.08
  -1   9   6  157.70   10.01
   1   9  -6  163.92   13.67
   1   9  -6  169.96   11.17
   1   9  -6  157.58    9.54
   1   9  -5    4.08    4.64
  -1   9   5    4.05    4.53
   1   9  -5   -2.72    5.55
  -1   9   4  174.69    8.78
   1   9  -4  173.45   11.43
   1   9  -4  198.00    9.30
   1   9  -3   49.11    7.20
   1   9  -3   57.41    5.47
  -1   9   3   62.73    6.50
   1   9  -2  189.07   11.28
   1   9  -2  200.95    7.75
   1   9  -2  193.73    8.41
  -1   9   2  202.18    9.52
   1   9  -2  202.36    8.67
   1   9  -1  368.20   15.54
   1   9  -1  359.93   10.93
  -1   9   1  358.46   13.14
   1   9  -1  361.94   12.72
   1   9  -1  379.14   12.06
  -1   9   1  404.03   13.20
   1   9   0  180.18   10.86
   1   9   0  188.14    7.11
  -1   9   0  189.25    8.65
   1   9   0  164.58    9.02
  -1   9   0  180.55    8.59
   1   9   0  195.79    8.05
  -1   9  -1  133.38    9.32
   1   9   1  148.42    7.38
  -1   9  -1  145.59    7.82
   1   9   1  149.34    6.54
  -1   9  -1  143.32    7.38
   1   9   2  126.68    7.45
  -1   9  -2  121.54    7.58
  -1   9  -2  120.67    9.12
  -1   9  -2  131.72    7.03
   1   9   2  115.96    6.18
  -1   9  -3  100.03    7.33
   1   9   3  109.96    6.67
  -1   9  -3  118.31    6.96
  -1   9  -3  118.65    8.88
   1   9   3  119.45    8.95
   1   9   4 1595.87   37.28
  -1   9  -4 1545.96   39.81
   1   9   4 1603.60   40.04
  -1   9  -4 1598.82   36.67
   1   9   5  984.52   26.73
   1   9   5  982.07   27.90
  -1   9  -5  916.52   27.70
  -1   9  -5  988.24   25.30
  -1   9  -5  970.30   26.84
  -1   9  -6   10.38    8.30
   1   9   6   16.14    6.45
  -1   9  -6   19.75    6.45
   1   9   6   13.62    5.60
  -1   9  -7   85.99   11.81
   1   9   7   90.34    9.77
  -1   9  -7   82.00    8.24
   1   9   7   80.84    8.09
  -1   9  -8   21.54    9.89
   1   9   8   35.51    7.01
  -1   9  -8   41.80    7.11
  -1   9  -9   20.37    9.68
  -1   9  -9   16.36    6.16
   1   9   9   24.89    6.33
  -1   9 -10   16.62   11.12
   1   9  10   11.59    5.68
   1  10 -10   26.96   11.87
   1  10 -10   37.36    7.96
   1  10  -9   -4.55   10.58
   1  10  -9   14.14    7.34
   1  10  -8    0.84    9.93
   1  10  -8    8.17    6.73
   1  10  -7  485.45   23.69
   1  10  -7  488.90   19.62
   1  10  -6   88.86   11.59
   1  10  -6   98.22    8.13
   1  10  -6   83.46    9.61
  -1  10   5  192.43   10.09
   1  10  -5  192.71    9.96
   1  10  -5  163.17   11.72
  -1  10   4  182.48    9.29
   1  10  -4  195.48    9.57
   1  10  -4  203.99   12.55
  -1  10   3  130.94    7.30
   1  10  -3  134.51    6.72
   1  10  -3  115.33   10.01
  -1  10   3  143.04    9.02
   1  10  -3  128.09    7.67
   1  10  -2  745.78   25.20
  -1  10   2  784.77   20.13
   1  10  -2  773.19   19.57
   1  10  -2  752.94   21.00
   1  10  -2  779.99   20.77
  -1  10   2  791.73   22.16
   1  10  -1   87.52    8.90
   1  10  -1   99.93    5.60
   1  10  -1   92.97    7.13
  -1  10   1   82.95    7.47
  -1  10   1   94.30    6.99
   1  10  -1   97.90    6.33
   1  10   0   83.84    8.71
  -1  10   0   77.56    8.28
   1  10   0   77.51    5.03
   1  10   0   74.13    7.20
  -1  10   0   64.23    6.25
  -1  10   0   74.98    6.32
   1  10   0   73.85    5.74
  -1  10  -1  233.12   12.94
   1  10   1  243.64   10.05
  -1  10  -1  238.18   10.58
   1  10   1  245.57    8.98
  -1  10  -1  253.17   10.14
  -1  10  -2  414.38   13.71
   1  10   2  406.40   12.83
  -1  10  -2  420.47   14.67
   1  10   2  413.42   14.14
   1  10   3  160.42    8.23
  -1  10  -3  168.57    9.24
   1  10   3  157.36   10.72
  -1  10  -3  142.93   10.36
  -1  10  -3  163.54    8.28
   1  10   4  188.82    9.44
  -1  10  -4  177.64    9.95
  -1  10  -4  187.96    9.12
  -1  10  -4  195.90   11.93
   1  10   4  172.01   11.41
   1  10   5  156.78    9.95
   1  10   5  149.58   10.90
  -1  10  -5  160.64   11.08
   1  10   6    2.54    6.16
  -1  10  -6    4.13    5.95
   1  10   6    6.75    5.83
   1  10   7    0.45    6.02
  -1  10  -7    2.73    6.40
  -1  10  -8   95.08   13.16
  -1  10  -8   89.21    9.06
   1  10   8  103.55    9.79
  -1  10  -9   31.69   11.63
   1  10   9   19.84    6.96
  -1  10  -9   25.84    6.72
   1  11 -10    4.99   10.61
   1  11 -10    1.59    7.36
   1  11  -9    1.89    9.83
   1  11  -9    6.55    7.21
   1  11  -8    2.65    9.23
   1  11  -8    6.65    7.69
   1  11  -7    0.56    7.17
   1  11  -6   41.86    9.86
   1  11  -6   48.40    8.38
   1  11  -5   22.59    7.06
   1  11  -5   21.73    5.35
   1  11  -4  228.36   10.61
   1  11  -4  234.36    9.52
   1  11  -4  226.23   13.98
  -1  11   3   93.14    6.89
   1  11  -3  105.93    6.37
   1  11  -3  105.83   10.19
   1  11  -3  101.47    7.32
  -1  11   3  101.11    8.41
   1  11  -2   12.52    3.58
  -1  11   2   18.34    4.20
   1  11  -2   15.92    7.04
  -1  11   2   12.33    5.44
   1  11  -2   26.55    4.83
   1  11  -1  199.48   12.79
  -1  11   1  182.65    8.35
   1  11  -1  188.22    7.90
  -1  11   1  191.99   10.97
   1  11  -1  179.00   10.17
   1  11  -1  200.87    9.20
  -1  11   1  190.99    9.95
   1  11   0   30.94    7.50
  -1  11   0   35.28    7.45
  -1  11   0   27.26    4.29
   1  11   0   31.51    4.20
   1  11   0   30.23    6.21
  -1  11   0   30.21    5.67
   1  11   0   33.82    4.99
  -1  11   0   36.17    5.77
  -1  11  -1  117.23   10.31
   1  11   1  126.46    7.76
  -1  11  -1   98.44    7.67
  -1  11  -1  118.48    6.80
   1  11   1  127.89    6.71
  -1  11  -1  122.51    8.02
  -1  11  -2  200.77   10.24
   1  11   2  203.98   10.02
  -1  11  -2  186.90    8.63
  -1  11  -2  185.25   12.40
   1  11   2  200.90    8.82
  -1  11  -3   15.88    5.38
   1  11   3   16.02    4.74
  -1  11  -3   11.61    6.52
   1  11   4    5.49    4.72
   1  11   4    5.03    6.69
  -1  11  -4   14.74    6.72
   1  11   5  139.01   11.09
  -1  11  -5  134.30   10.99
  -1  11  -6   -0.51    6.57
   1  11   6   -2.00    5.95
  -1  11  -7    6.52    6.65
   1  11   7    1.99    6.85
   1  11   8    3.46    6.61
  -1  11  -8   -1.94    6.67
  -1  11  -9   20.52    7.06
   1  12  -9   27.59    8.52
   1  12  -9   23.53   10.89
   1  12  -8   98.63   11.02
   1  12  -8  108.14   14.58
   1  12  -7   24.04    8.47
   1  12  -7   20.07    9.85
   1  12  -6   44.73    9.39
   1  12  -6   49.40   11.20
   1  12  -5   62.48    9.60
   1  12  -4   40.53    8.65
   1  12  -3  137.24   11.99
   1  12  -3  124.83    8.24
  -1  12   3  102.34    9.22
  -1  12   2  301.75   13.44
   1  12  -2  298.47   12.06
   1  12  -2  299.02   16.39
   1  12  -2  290.48   10.62
   1  12  -1  120.37    7.61
  -1  12   1  100.19    8.29
   1  12  -1  112.61   10.79
  -1  12   1  118.29   10.99
   1  12  -1  113.81    6.52
   1  12   0  216.79   10.19
  -1  12   0  221.92   10.87
  -1  12   0  229.96   14.04
   1  12   0  225.55   14.31
   1  12   0  206.96    8.92
   1  12   1    7.80    4.85
   1  12   1    9.76    4.06
   1  12   2   31.17    6.09
   1  12   2   30.00    5.00
   1  12   2   21.24    7.32
  -1  12  -2   25.35    7.79
   1  12   3   27.97    7.73
  -1  12  -3   35.15    8.01
   1  12   4    4.45    6.97
  -1  12  -4    2.25    6.96
  -1  12  -5    9.01    7.07
  -1  12  -6  169.50   12.70
  -1  12  -7   15.88    7.51
   1  12   7    8.79    7.35
  -1  12  -8   51.31    8.73
   1  12   8   57.55    9.33
   1  13  -7   21.98    9.06
   1  13  -7   10.09    9.89
   1  13  -6  142.26   12.90
   1  13  -6  133.48   14.72
   1  13  -5   37.74    9.35
   1  13  -4   24.01    8.39
   1  13  -3   70.58   10.54
  -1  13   2   17.29    7.76
   1  13  -2   11.55    7.53
   1  13  -1  258.15   16.08
  -1  13   1  282.05   16.64
   1  13  -1  295.17   12.13
   1  13   0   13.17    7.49
   1  13   0    7.48    5.30
  -1  13  -1   28.16    8.37
   1  13   1   37.20    6.32
  -1  13  -2   37.18    8.96
   1  13   2   31.39    8.62
   1  13   2   36.17    6.53
  -1  13  -3   18.46    8.19
   1  13   3    8.49    6.93
   1  13   4   72.96   10.17
  -1  13  -4   58.41    9.39
  -1  13  -5   50.25    9.75
   1  13   5   50.35    9.43
   1  13   6    3.01    7.76
  -1  13  -6   -1.21    8.13
  -1  13  -7   15.43    8.10
   1  13   7   14.91    8.13
   1  14  -6   35.00   11.20
   1  14  -6   26.60    9.24
  -1  14   6   29.97    9.50
   1  14  -5  102.58   12.42
  -1  14   5   84.87   11.63
  -1  14   4   36.61    9.38
   1  14  -4   11.92    8.61
   1  14  -3   11.91    8.60
   1  14  -2   65.57   10.42
  -1  14   2   58.64   10.29
   1  14  -1   24.92    8.81
   1  14   0   15.09    8.64
  -1  14   0   13.41    8.66
  -1  14  -1   -4.62    8.28
   1  14   2   16.20    8.86
  -1  14  -2   30.73    9.29
  -1  14  -3  226.07   15.65
   1  14   3  249.06   16.40
  -1  14  -4   79.18   11.28
   1  14   4   89.48   11.44
  -1  14  -5   34.44    9.53
   1  14   5   35.16    9.05
  -1  15   4   21.22    9.69
   1  15  -4   36.85   10.21
   1  15  -3   -4.51    8.87
   1  15  -2   64.78   11.50
  -1  15   1   55.28   11.22
   1  15  -1   42.64   10.54
   1  15   0  111.98   12.94
  -1  15   0  101.01   12.34
  -1  15  -1    2.17    8.57
  -1  15  -2   13.06    8.91
   1  15   2   27.85   10.08
   1  15   3  119.26   12.97
  -1  15  -3  113.16   13.12
  -2 -15   3   42.17    9.51
  -2 -15   3   33.14    7.58
   2 -15  -3   32.89    7.70
   2 -15  -3   20.55    7.42
  -2 -15   3   16.58    6.71
   2 -15  -3   28.72    6.45
  -2 -15   3   41.56   10.65
   2 -15  -2   18.42    6.47
  -2 -15   2   32.90    7.39
  -2 -15   2   24.19   10.08
   2 -15  -2   20.96    7.09
   2 -15  -2   39.08    8.52
  -2 -15   2   45.83    7.72
  -2 -15   2   31.57    8.87
   2 -15  -1   41.80    7.35
  -2 -15   1   29.44    6.81
  -2 -15   1   26.05    8.06
   2 -15  -1   33.80    8.11
  -2 -15   1   30.90    6.92
   2 -15  -1   39.63    8.39
   2 -15   0   34.80    7.23
  -2 -15   0   31.33    6.86
   2 -15   0   33.19    8.34
  -2 -15   0   21.82    8.33
  -2 -15   0   35.67    6.64
   2 -15   0   27.65    8.13
   2 -15   1   18.34    8.01
  -2 -15  -1   10.70    7.33
  -2 -15  -1   20.73    6.29
   2 -15   1   25.01    6.94
   2 -15   1   26.51    8.94
   2 -15   2  126.20   11.94
   2 -15   2  137.16   13.11
   2 -15   2  152.45   11.66
   2 -14  -6   41.31    6.56
  -2 -14   6   51.82    9.29
   2 -14  -6   38.43    7.66
  -2 -14   6   32.45    9.64
  -2 -14   6   49.17    8.64
  -2 -14   5   30.43    7.29
   2 -14  -5   11.72    5.58
  -2 -14   5   22.06    7.32
   2 -14  -5   12.43    6.44
  -2 -14   5    7.59    8.21
  -2 -14   5    9.79    7.88
  -2 -14   4    5.04    5.71
   2 -14  -4    4.88    5.06
  -2 -14   4    9.66    6.49
   2 -14  -4    2.41    6.33
  -2 -14   4   14.38    8.21
  -2 -14   4    6.55    8.24
  -2 -14   3  107.30    9.64
   2 -14  -3  121.28   10.32
  -2 -14   3  109.76   11.15
   2 -14  -3  119.60   10.26
  -2 -14   3  122.12   13.06
  -2 -14   3  103.45    9.46
   2 -14  -3  128.52    9.06
   2 -14  -2   36.39    7.74
  -2 -14   2   27.22    6.62
  -2 -14   2   29.65    8.08
   2 -14  -2   36.06    7.40
  -2 -14   2   26.18    9.92
  -2 -14   2   31.19    6.79
   2 -14  -2   34.17    6.39
  -2 -14   1   32.70    7.75
   2 -14  -1   28.36    7.18
   2 -14  -1   27.50    7.19
  -2 -14   1   26.48    6.18
   2 -14  -1   20.52    6.08
  -2 -14   1   24.39    6.12
   2 -14   0   50.42    8.65
   2 -14   0   59.99    8.55
  -2 -14   0   37.38    7.85
  -2 -14   0   54.21    7.05
  -2 -14   0   55.24    7.03
   2 -14   0   51.84    7.65
   2 -14   1   96.64   10.40
  -2 -14  -1  129.90   11.05
  -2 -14  -1  128.35    8.98
   2 -14   1  113.08   11.01
   2 -14   1  113.20    9.48
  -2 -14  -1  110.66    8.81
  -2 -14  -2  228.51   11.32
   2 -14   2  244.16   14.53
  -2 -14  -2  233.04   12.05
   2 -14   3   48.81    9.46
  -2 -14  -3   53.92    7.30
  -2 -14  -3   58.90    6.84
   2 -14   3   59.73    9.16
  -2 -14  -4  122.06    9.27
   2 -14   4  135.66   12.28
   2 -14   4  133.47   12.69
   2 -14   4  126.35   11.30
   2 -13  -8  101.31    9.35
  -2 -13   8   85.54    8.21
  -2 -13   8   86.21   10.13
   2 -13  -8   88.02    8.28
   2 -13  -8   96.73    8.06
   2 -13  -7  116.18    9.00
  -2 -13   7  110.80   10.70
   2 -13  -7  110.13    9.73
  -2 -13   7  119.31   13.15
   2 -13  -7   96.94    8.01
  -2 -13   7  109.82    9.79
   2 -13  -6   67.51    7.17
  -2 -13   6   65.62    8.72
   2 -13  -6   53.70    7.80
  -2 -13   6   81.75   10.97
   2 -13  -6   69.23    6.95
  -2 -13   6   74.88    9.35
   2 -13  -5   14.58    5.55
  -2 -13   5    9.28    6.10
  -2 -13   5   14.09    6.68
   2 -13  -5   25.38    6.55
  -2 -13   5   21.25    8.29
  -2 -13   5    8.69    7.31
  -2 -13   4   28.86    6.72
   2 -13  -4   29.77    5.74
  -2 -13   4   26.80    6.74
   2 -13  -4   28.61    6.55
  -2 -13   4   22.35    7.77
  -2 -13   4   18.39    8.09
  -2 -13   3   -4.66    5.89
  -2 -13   3    8.02    6.71
   2 -13  -3    1.36    5.63
  -2 -13   3    6.55    5.04
   2 -13  -3   -0.75    4.46
  -2 -13   3    8.25    8.30
   2 -13  -2  245.90   13.18
   2 -13  -2  234.62   11.75
  -2 -13   2  233.57   12.20
  -2 -13   2  253.93   14.71
  -2 -13   2  245.49   12.31
   2 -13  -2  230.02   13.00
  -2 -13   1   11.10    5.11
   2 -13  -1   16.72    5.18
  -2 -13   1   17.34    7.26
  -2 -13   1    7.78    5.23
   2 -13  -1    8.99    6.19
   2 -13  -1   20.02    6.47
   2 -13   0   34.05    6.17
  -2 -13   0   39.27    6.25
   2 -13   0   37.69    7.27
  -2 -13   0   41.31    7.84
  -2 -13   0   32.70    5.72
   2 -13   0   32.21    7.35
   2 -13   1   40.56    7.93
  -2 -13  -1   41.75    6.11
  -2 -13  -1   46.51    6.17
   2 -13   1   34.68    7.40
   2 -13   2   56.73    5.31
  -2 -13  -2   49.22    6.23
   2 -13   2   72.59    8.94
   2 -13   2   52.39    8.65
  -2 -13  -2   60.52    6.69
   2 -13   3  457.18   20.46
   2 -13   3  468.72   14.12
   2 -13   3  432.92   19.57
  -2 -13  -3  452.49   15.76
  -2 -13  -3  444.76   16.77
  -2 -13  -4  103.96    7.59
   2 -13   4   92.88    5.95
   2 -13   4  108.67   10.83
   2 -13   4  106.41   11.46
  -2 -13  -4   90.03    8.24
  -2 -13  -5   44.85    6.70
  -2 -13  -5   44.58    5.99
   2 -13   5   32.30    8.92
   2 -13   5   42.82    4.17
   2 -13   5   36.60    9.34
   2 -13   5   37.19    6.80
  -2 -13  -6   45.72    7.42
   2 -13   6   55.89    9.80
   2 -13   6   34.75    9.84
   2 -13   6   46.49    5.80
  -2 -13  -6   45.06    5.62
   2 -12  -9  130.51    9.78
   2 -12  -9  124.23   10.39
  -2 -12   9  141.83   11.85
  -2 -12   9  122.93   14.06
   2 -12  -9  128.20    8.66
  -2 -12   9  138.79    8.73
   2 -12  -8   20.61    5.98
   2 -12  -8   19.29    6.40
  -2 -12   8   15.82    5.27
  -2 -12   8   25.12    7.64
  -2 -12   8   12.06    9.13
   2 -12  -8    9.09    4.75
   2 -12  -7   85.62    7.55
  -2 -12   7   91.64    9.95
   2 -12  -7   73.76    8.14
  -2 -12   7   87.19   11.45
  -2 -12   7   82.64    8.25
   2 -12  -7   75.29    6.85
   2 -12  -6   23.50    5.32
  -2 -12   6   29.15    7.09
   2 -12  -6   25.08    6.03
  -2 -12   6   31.08    8.67
  -2 -12   6   30.34    7.21
   2 -12  -6   21.01    5.10
  -2 -12   5   54.33    7.28
   2 -12  -5   54.45    6.33
  -2 -12   5   40.73    7.10
   2 -12  -5   51.71    6.88
  -2 -12   5   57.69    9.25
  -2 -12   5   43.92    8.33
   2 -12  -5   44.30    5.57
   2 -12  -4   18.27    4.68
  -2 -12   4   21.39    5.85
  -2 -12   4   32.65    6.84
   2 -12  -4   22.94    6.06
  -2 -12   4   14.49    7.23
  -2 -12   4   24.36    7.80
   2 -12  -3  385.08   15.91
   2 -12  -3  407.95   14.75
  -2 -12   3  371.70   15.16
  -2 -12   3  393.61   19.91
  -2 -12   3  362.29   17.18
  -2 -12   3  365.67   15.15
  -2 -12   2  138.05   10.75
   2 -12  -2  103.28    8.96
   2 -12  -2  127.35    8.40
  -2 -12   2  130.13    8.94
  -2 -12   2  123.12    8.77
   2 -12  -2  127.25    9.33
  -2 -12   1  340.36   15.83
   2 -12  -1  330.16   14.98
   2 -12  -1  335.87   15.19
  -2 -12   1  363.25   14.00
  -2 -12   1  376.94   14.55
   2 -12  -1  356.28   14.24
   2 -12   0   53.80    5.36
  -2 -12   0   48.48    5.97
   2 -12   0   58.92    7.83
  -2 -12   0   50.19    7.65
  -2 -12   0   50.15    6.10
   2 -12   0   57.89    7.72
   2 -12   1   31.50    4.77
   2 -12   1   23.52    6.59
  -2 -12  -1   50.50    5.80
   2 -12   1   32.20    7.03
  -2 -12  -1   33.00    5.49
   2 -12   2  116.62   10.09
   2 -12   2  103.25    6.35
  -2 -12  -2  105.18    7.20
   2 -12   2  127.12   10.32
  -2 -12  -2   90.43    7.56
  -2 -12  -3   53.29    5.53
   2 -12   3   51.43    4.80
   2 -12   3   49.97    8.03
   2 -12   3   34.64    8.19
  -2 -12  -3   50.21    6.22
  -2 -12  -4   62.01    6.03
   2 -12   4   73.42    5.06
   2 -12   4   76.18    9.31
   2 -12   4   74.71    9.78
  -2 -12  -4   69.42    7.15
  -2 -12  -5   28.04    5.82
  -2 -12  -5   31.20    5.24
   2 -12   5   22.53    3.42
   2 -12   5   27.54    8.00
   2 -12   5   27.27    8.86
  -2 -12  -5   19.04    4.26
   2 -12   5   33.95    6.21
  -2 -12  -6   97.90    8.80
  -2 -12  -6   98.01    7.26
   2 -12   6   94.94    4.91
   2 -12   6   86.19   10.51
   2 -12   6  114.49   12.31
  -2 -12  -6   94.96    6.98
   2 -12   6  107.06    7.10
  -2 -12  -7  270.85   14.12
  -2 -12  -7  278.36   11.79
   2 -12   7  279.37   16.69
   2 -12   7  268.70   18.08
  -2 -12  -7  275.12   11.40
   2 -12   7  254.61    8.93
   2 -11 -10    8.77    6.16
   2 -11 -10   16.64    6.88
  -2 -11  10   17.38    4.26
  -2 -11  10    6.55    7.00
  -2 -11  10    9.06    9.91
   2 -11 -10    6.45    4.85
   2 -11  -9   19.46    5.72
   2 -11  -9   13.47    6.10
  -2 -11   9   22.15    4.70
  -2 -11   9   16.39    7.55
  -2 -11   9   23.06    9.60
   2 -11  -9   28.78    5.40
   2 -11  -8    8.58    5.10
   2 -11  -8   13.20    6.01
  -2 -11   8    9.15    4.77
  -2 -11   8    4.81    6.52
  -2 -11   8   11.39    7.97
   2 -11  -8    9.83    4.51
  -2 -11   7  301.54   15.30
  -2 -11   7  320.56   17.86
   2 -11  -7  345.37   14.70
   2 -11  -7  314.14   13.27
  -2 -11   7  336.43   14.50
   2 -11  -7  331.10   12.85
   2 -11  -6   41.96    5.60
  -2 -11   6   28.92    6.77
   2 -11  -6   40.72    6.37
  -2 -11   6   44.06    9.01
   2 -11  -6   36.97    5.22
  -2 -11   6   39.93    6.99
  -2 -11   5   85.15    7.98
   2 -11  -5   86.74    6.71
   2 -11  -5   86.64    7.24
  -2 -11   5   99.10    8.76
   2 -11  -5  102.50    8.28
  -2 -11   5   85.83    9.81
  -2 -11   5  113.85   10.06
   2 -11  -5   85.31    6.70
   2 -11  -4    5.55    4.03
  -2 -11   4    3.13    4.98
   2 -11  -4    3.37    5.06
  -2 -11   4   11.03    5.69
  -2 -11   4   14.28    7.03
   2 -11  -4    7.41    4.14
  -2 -11   4    4.73    6.86
   2 -11  -3   40.69    6.36
   2 -11  -3   36.73    5.05
  -2 -11   3   34.69    6.13
  -2 -11   3   39.19    6.86
   2 -11  -3   35.59    5.21
  -2 -11   3   33.56    5.65
  -2 -11   3   44.76    8.99
  -2 -11   2  211.96   12.24
   2 -11  -2  226.74   11.47
   2 -11  -2  214.92    9.47
   2 -11  -2  226.13   11.56
  -2 -11   2  227.25   10.81
   2 -11  -2  204.65    9.94
  -2 -11   2  215.87   10.57
  -2 -11   1  334.63   14.76
   2 -11  -1  302.96   13.81
   2 -11  -1  337.74   11.75
   2 -11  -1  321.11   14.11
  -2 -11   1  341.60   12.85
  -2 -11   1  313.17   12.71
   2 -11  -1  307.09   12.71
  -2 -11   0   53.33    5.78
   2 -11   0   69.32    7.61
   2 -11   0   63.79    7.41
   2 -11   0   58.75    5.22
  -2 -11   0   50.33    5.99
   2 -11   1  183.36   11.02
   2 -11   1  185.09    8.11
   2 -11   1  189.96   11.35
  -2 -11  -1  176.86    8.79
  -2 -11  -1  177.93    9.40
  -2 -11  -2   57.89    5.54
   2 -11   2   54.91    4.69
   2 -11   2   62.67    7.88
   2 -11   2   47.26    7.75
  -2 -11  -2   52.09    5.83
  -2 -11  -3   77.43    6.19
   2 -11   3   69.72    4.99
   2 -11   3   69.95    8.43
   2 -11   3   80.57    9.36
  -2 -11  -3   72.34    6.93
  -2 -11  -4   65.84    7.05
  -2 -11  -4   64.11    5.77
   2 -11   4   76.52    4.79
   2 -11   4   73.61    8.74
   2 -11   4   71.69    9.19
  -2 -11  -4   73.83    5.58
  -2 -11  -5   13.74    5.26
  -2 -11  -5   17.93    4.50
   2 -11   5   15.12    2.92
   2 -11   5   16.39    7.48
   2 -11   5   15.92    7.89
  -2 -11  -5   17.66    4.12
   2 -11   5    8.84    5.11
  -2 -11  -6   86.17    8.62
  -2 -11  -6  111.65    7.33
   2 -11   6   94.33    4.54
   2 -11   6  111.85   10.87
   2 -11   6   90.58   11.10
   2 -11   6  103.14    6.52
  -2 -11  -6  110.79    6.93
  -2 -11  -7   58.64    7.89
  -2 -11  -7   41.04    5.76
   2 -11   7   42.67    8.96
   2 -11   7   45.16    3.49
   2 -11   7   48.40    2.90
   2 -11   7   46.10   10.40
  -2 -11  -7   52.85    5.56
  -2 -11  -8   90.89    9.72
   2 -11   8   77.16   10.77
   2 -11   8   70.17   11.87
  -2 -11  -8   96.07    6.96
  -2 -10  11  126.07    6.43
   2 -10 -11  135.67   11.11
   2 -10 -11  109.55   10.92
   2 -10 -11  123.57    8.74
   2 -10 -10    7.63    5.97
   2 -10 -10    1.42    6.22
  -2 -10  10    7.93    3.64
  -2 -10  10   16.61    9.70
   2 -10 -10    8.67    4.82
   2 -10  -9   89.83    8.48
  -2 -10   9   87.08   10.07
   2 -10  -9  100.91    9.05
  -2 -10   9   93.08   11.74
   2 -10  -9   95.28    7.32
  -2 -10   9  107.21    7.08
   2 -10  -8  293.22   13.57
  -2 -10   8  287.97   14.90
  -2 -10   8  262.78   16.31
   2 -10  -8  257.05   12.46
  -2 -10   8  293.78   12.16
   2 -10  -8  282.02   11.67
   2 -10  -7   17.18    5.09
   2 -10  -7   13.09    5.33
  -2 -10   7   19.80    5.37
  -2 -10   7    9.48    6.11
  -2 -10   7   24.59    7.99
   2 -10  -7   12.31    4.09
   2 -10  -6   40.27    6.21
   2 -10  -6   42.79    5.79
  -2 -10   6   30.22    6.39
   2 -10  -6   37.78    6.14
  -2 -10   6   35.87    7.76
  -2 -10   6   39.72    6.41
   2 -10  -6   36.06    4.83
   2 -10  -5  107.31    7.11
  -2 -10   5  103.11    8.30
  -2 -10   5  111.54    9.98
  -2 -10   5  108.92    8.72
   2 -10  -5  100.60    7.76
   2 -10  -5   88.14    7.05
   2 -10  -5   98.46    6.73
  -2 -10   5   98.40    8.85
  -2 -10   4   34.56    5.79
   2 -10  -4   32.48    4.87
   2 -10  -4   32.21    5.46
  -2 -10   4   33.56    6.02
  -2 -10   4   42.42    7.49
   2 -10  -4   30.14    4.46
  -2 -10   4   39.06    7.58
   2 -10  -3  242.89   11.21
   2 -10  -3  222.26    9.56
  -2 -10   3  227.58   10.83
  -2 -10   3  218.84   12.33
   2 -10  -3  222.73    9.82
  -2 -10   3  248.95   11.04
  -2 -10   3  212.51   14.36
  -2 -10   2   70.38    6.41
  -2 -10   2   65.03    7.42
   2 -10  -2   69.37    5.53
   2 -10  -2   64.76    6.76
   2 -10  -2   57.63    5.62
  -2 -10   2   64.11    6.12
  -2 -10   1   27.90    4.78
   2 -10  -1   17.33    4.97
  -2 -10   1   18.96    5.58
   2 -10  -1   27.61    4.24
   2 -10  -1   26.34    5.52
  -2 -10   1   18.14    4.47
   2 -10   0  120.10    8.50
   2 -10   0  119.67    6.47
   2 -10   0  114.05    8.68
  -2 -10   0  116.46    7.08
  -2 -10   0  106.44    7.11
   2 -10   1   23.02    5.73
   2 -10   1   19.28    5.66
   2 -10   1   25.20    3.94
  -2 -10  -1   22.38    4.25
  -2 -10  -1   20.58    4.49
   2 -10   2 1524.82   38.87
   2 -10   2 1564.62   33.41
   2 -10   2 1453.67   38.99
  -2 -10  -2 1487.52   34.30
  -2 -10  -2 1463.37   35.84
  -2 -10  -3   20.75    4.75
  -2 -10  -3   19.61    4.73
  -2 -10  -3   17.21    4.08
   2 -10   3   26.91    3.62
   2 -10   3   28.51    6.82
   2 -10   3   21.06    6.68
  -2 -10  -3   23.13    3.73
  -2 -10  -4  360.56   12.10
   2 -10   4  355.51   10.33
   2 -10   4  350.74   16.56
   2 -10   4  344.80   16.10
  -2 -10  -4  366.49   14.24
  -2 -10  -4  342.37   11.61
  -2 -10  -5  120.12    9.14
  -2 -10  -5  106.16    6.96
   2 -10   5  121.26    5.22
   2 -10   5  119.41   10.42
   2 -10   5  124.16   11.01
   2 -10   5  120.58    7.68
  -2 -10  -5  108.72    6.51
  -2 -10  -6   79.26    8.41
  -2 -10  -6   83.30    6.48
   2 -10   6   86.42    3.99
   2 -10   6   73.28    9.43
   2 -10   6   78.08   10.50
  -2 -10  -6   92.46    6.08
   2 -10   6   83.80    5.29
  -2 -10  -7   75.01    8.81
  -2 -10  -7   78.92    6.71
   2 -10   7   77.53    3.01
   2 -10   7   73.86    9.56
   2 -10   7   93.60   11.14
  -2 -10  -7   90.34    6.39
   2 -10   7   71.21    3.43
  -2 -10  -8   62.60    8.85
   2 -10   8   62.67    9.51
  -2 -10  -8   63.72    6.74
   2 -10   8   75.54   12.05
  -2 -10  -8   68.34    6.05
  -2 -10  -9   53.20    9.45
  -2 -10  -9   45.47    6.72
   2 -10   9   44.96    9.47
   2 -10   9   44.26   11.25
  -2 -10  -9   55.96    6.12
   2  -9 -11  214.69   14.10
  -2  -9  11  202.14    7.96
   2  -9 -11  186.24   12.78
  -2  -9  11  196.36   16.36
   2  -9 -11  212.02   10.89
   2  -9 -10   43.00    8.23
   2  -9 -10   38.60    7.49
  -2  -9  10   40.71    4.46
  -2  -9  10   35.82    9.60
   2  -9 -10   44.92    5.97
   2  -9  -9   62.73    8.17
   2  -9  -9   60.81    7.70
  -2  -9   9   60.77    5.45
  -2  -9   9   57.80    8.21
  -2  -9   9   57.83   10.55
   2  -9  -9   74.86    6.43
   2  -9  -8   42.39    6.73
   2  -9  -8   43.43    6.64
  -2  -9   8   43.21    5.26
  -2  -9   8   47.10    7.59
  -2  -9   8   35.13    8.60
   2  -9  -8   46.33    5.45
   2  -9  -7  146.83    9.47
   2  -9  -7  153.93    9.59
  -2  -9   7  161.72   10.66
  -2  -9   7  147.46   11.98
   2  -9  -7  137.15    9.66
  -2  -9   7  165.65    9.21
   2  -9  -7  164.80    8.30
   2  -9  -6   52.49    6.12
   2  -9  -6   42.86    5.66
   2  -9  -6   43.25    6.17
   2  -9  -6   49.21    5.50
  -2  -9   6   56.54    7.08
  -2  -9   6   62.55    8.57
   2  -9  -6   41.07    4.73
  -2  -9   6   41.96    6.09
  -2  -9   5   27.27    5.56
   2  -9  -5   22.96    4.72
   2  -9  -5   22.41    4.72
   2  -9  -5   23.45    5.24
   2  -9  -5   20.45    4.31
  -2  -9   5   31.64    6.05
  -2  -9   5   24.81    6.50
  -2  -9   5   30.96    6.21
   2  -9  -5   22.84    4.19
   2  -9  -4   12.41    3.90
  -2  -9   4    9.68    4.53
   2  -9  -4   14.67    4.06
  -2  -9   4   11.06    4.83
   2  -9  -4   11.90    4.41
  -2  -9   4   11.44    5.73
  -2  -9   4   17.98    6.14
   2  -9  -4   14.82    3.89
   2  -9  -3   79.56    6.79
  -2  -9   3   71.47    6.37
  -2  -9   3   64.04    7.28
  -2  -9   3   84.31    6.42
   2  -9  -3   78.01    5.81
   2  -9  -3   70.81    5.43
  -2  -9   3   79.45    9.24
  -2  -9   2  797.34   24.16
   2  -9  -2  875.77   21.52
  -2  -9   2  834.00   22.41
   2  -9  -2  839.59   23.39
  -2  -9   2  837.61   22.47
  -2  -9   1  259.02   11.71
   2  -9  -1  252.01   10.83
   2  -9  -1  268.30    9.55
  -2  -9   1  259.81   10.11
   2  -9  -1  256.03   11.18
  -2  -9   1  251.95   10.18
   2  -9   0  184.62    9.64
   2  -9   0  211.73    8.12
   2  -9   0  207.53   10.43
  -2  -9   0  203.40    8.55
  -2  -9   0  228.43    9.41
   2  -9   1  209.70   10.44
   2  -9   1  220.50    8.03
   2  -9   1  209.93   10.95
  -2  -9  -1  187.54    8.10
  -2  -9  -1  213.49    9.23
   2  -9   2  111.17    8.46
   2  -9   2  112.67    5.52
   2  -9   2  106.70    8.48
  -2  -9  -2  107.63    6.06
  -2  -9  -2  121.68    7.32
  -2  -9  -3 3673.82   76.62
  -2  -9  -3 3583.39   73.81
   2  -9   3 3655.26   79.80
   2  -9   3 3786.06   72.56
   2  -9   3 3632.64   79.78
  -2  -9  -3 3432.51   75.82
  -2  -9  -3 3565.99   73.49
  -2  -9  -4  229.22   11.16
  -2  -9  -4  235.55    9.26
   2  -9   4  254.63    7.75
   2  -9   4  264.80   13.33
   2  -9   4  248.93   13.53
  -2  -9  -4  220.86   10.92
  -2  -9  -4  240.87    8.89
  -2  -9  -5   44.74    6.62
  -2  -9  -5   57.41    5.25
  -2  -9  -5   63.49    6.04
   2  -9   5   47.56    3.22
   2  -9   5   48.79    7.68
   2  -9   5   46.89    8.22
   2  -9   5   48.99    5.14
  -2  -9  -5   61.67    4.93
  -2  -9  -6    7.75    5.71
  -2  -9  -6    6.36    4.05
   2  -9   6    7.93    1.88
   2  -9   6   12.31    6.65
   2  -9   6    7.76    7.12
  -2  -9  -6   13.32    3.62
   2  -9   6    8.58    2.73
  -2  -9  -7   96.74    9.22
  -2  -9  -7   81.88    6.84
   2  -9   7   62.60    8.93
   2  -9   7   93.18   11.02
  -2  -9  -7   83.01    6.02
  -2  -9  -8  134.90   11.97
  -2  -9  -8  133.05    8.75
   2  -9   8  147.67   13.40
  -2  -9  -8  131.04    7.70
   2  -9   8  122.90   11.57
  -2  -9  -9   15.86    5.90
   2  -9   9    6.98    8.97
  -2  -9  -9   18.75    4.87
   2  -9   9   17.31    7.60
  -2  -9 -10   33.89    7.01
   2  -9  10   31.57   10.44
  -2  -9 -10   20.22    5.30
   2  -8 -12   61.75    9.74
  -2  -8  12   80.98   12.90
   2  -8 -12   94.03    8.26
  -2  -8  12   85.45    4.71
   2  -8 -11   89.46    9.67
  -2  -8  11   74.79   11.32
   2  -8 -11   81.90    7.43
  -2  -8  11   78.27    4.89
   2  -8 -10   51.46    8.05
  -2  -8  10   49.70    4.39
  -2  -8  10   64.05   10.21
   2  -8 -10   49.04    6.12
   2  -8  -9  181.64    9.33
  -2  -8   9  163.96   10.73
   2  -8  -9  151.22   10.67
  -2  -8   9  154.99    7.64
  -2  -8   9  173.96   11.65
  -2  -8   9  155.72   12.95
   2  -8  -9  161.54   11.23
  -2  -8   8  660.59   18.85
   2  -8  -8  644.74   19.19
  -2  -8   8  676.87   21.92
   2  -8  -8  695.41   21.91
  -2  -8   8  698.18   22.82
  -2  -8   8  671.23   25.32
   2  -8  -8  646.60   22.24
   2  -8  -8  644.59   21.76
   2  -8  -7   50.19    5.28
  -2  -8   7   61.57    7.41
   2  -8  -7   50.35    6.33
  -2  -8   7   65.38    5.90
   2  -8  -7   56.94    5.51
  -2  -8   7   56.65    7.59
  -2  -8   7   51.62    8.24
   2  -8  -7   51.54    6.70
   2  -8  -7   45.57    6.32
  -2  -8   6  239.22   10.91
   2  -8  -6  222.33    9.32
  -2  -8   6  250.47   12.08
   2  -8  -6  222.75   10.80
   2  -8  -6  219.65   10.46
  -2  -8   6  217.80   13.06
  -2  -8   6  229.88   11.62
   2  -8  -6  217.32   10.54
   2  -8  -6  234.11    9.52
   2  -8  -5  131.45    6.94
   2  -8  -5  127.09    7.88
   2  -8  -5  122.30    7.16
  -2  -8   5  126.31    8.04
  -2  -8   5  122.36    8.31
  -2  -8   5  129.07    9.51
   2  -8  -5  113.32    7.08
  -2  -8   5  123.47    8.62
   2  -8  -5  119.20    6.48
   2  -8  -4  435.62   13.19
   2  -8  -4  416.86   14.35
  -2  -8   4  408.85   14.21
   2  -8  -4  418.92   13.26
  -2  -8   4  437.68   16.12
  -2  -8   4  419.30   14.65
   2  -8  -4  401.47   13.02
  -2  -8   4  433.62   16.72
   2  -8  -4  415.33   12.85
  -2  -8   3   40.61    5.79
  -2  -8   3   33.96    4.78
  -2  -8   3   33.21    4.32
   2  -8  -3   44.70    4.26
   2  -8  -3   48.31    4.47
  -2  -8   3   54.94    7.43
   2  -8  -3   33.99    4.62
  -2  -8   2  543.58   17.37
  -2  -8   2  506.30   15.44
   2  -8  -2  522.73   14.63
   2  -8  -2  536.08   16.32
  -2  -8   2  529.00   15.54
   2  -8  -1  305.71   11.27
  -2  -8   1  291.45   10.40
   2  -8  -1  311.34    9.95
   2  -8  -1  308.62   11.81
  -2  -8   1  296.96   10.38
   2  -8   0  218.92    9.61
  -2  -8   0  190.50    8.21
   2  -8   0  225.90    7.78
   2  -8   0  214.56    9.95
  -2  -8   0  189.05    7.80
   2  -8   1  368.40   13.37
  -2  -8  -1  350.41   11.90
   2  -8   1  367.07   10.57
  -2  -8  -1  351.92   10.81
   2  -8   1  351.78   13.65
  -2  -8  -2  426.06   12.05
   2  -8   2  399.44   15.21
  -2  -8  -2  439.21   13.93
   2  -8   2  421.56   15.19
  -2  -8  -2  411.33   11.75
   2  -8   2  424.84   11.47
   2  -8   3  398.55   10.44
  -2  -8  -3  373.83   11.35
   2  -8   3  379.67   15.12
  -2  -8  -3  385.32   13.71
   2  -8   3  386.71   15.38
  -2  -8  -3  359.81   12.93
  -2  -8  -3  376.47   11.14
   2  -8   4  516.64   12.29
  -2  -8  -4  502.31   14.22
  -2  -8  -4  493.13   17.03
   2  -8   4  488.77   18.95
   2  -8   4  512.74   18.48
  -2  -8  -4  449.51   16.22
  -2  -8  -4  497.73   13.76
  -2  -8  -5  393.18   13.04
   2  -8   5  369.75    9.20
  -2  -8  -5  378.61   12.29
  -2  -8  -5  359.53   15.41
   2  -8   5  361.99   15.87
   2  -8   5  339.62   16.51
  -2  -8  -5  354.37   14.54
   2  -8   5  361.31   11.32
  -2  -8  -5  365.91   11.54
   2  -8   6   46.51    2.88
  -2  -8  -6   39.34    4.32
   2  -8   6   38.15    7.18
  -2  -8  -6   46.61    5.38
   2  -8   6   35.05    7.79
   2  -8   6   46.68    2.24
  -2  -8  -6   45.88    5.36
  -2  -8  -7   42.86    4.93
   2  -8   7   35.81    7.57
  -2  -8  -7   40.53    5.84
   2  -8   7   38.37    8.81
  -2  -8  -7   35.66    5.20
  -2  -8  -8   11.33    5.29
   2  -8   8    6.89    8.02
  -2  -8  -8   11.70    4.14
   2  -8   8   16.18    7.39
  -2  -8  -9   23.45    6.23
   2  -8   9   21.67    8.77
  -2  -8  -9   19.02    4.74
   2  -8   9   23.83    8.02
  -2  -8 -10   75.43    8.41
   2  -8  10   79.68   10.23
   2  -8  10   78.00   12.12
  -2  -8 -10   69.35    6.89
   2  -7 -12  331.08   14.72
  -2  -7  12  361.25   10.42
   2  -7 -12  377.28   18.17
  -2  -7  11   16.42    3.12
  -2  -7  11   17.42    6.63
  -2  -7  11   25.69    9.18
   2  -7 -11   20.88    5.45
   2  -7 -11   11.95    6.78
  -2  -7  10   67.99    4.61
   2  -7 -10   70.64    8.65
  -2  -7  10   75.16    8.08
  -2  -7  10   56.95   10.19
   2  -7 -10   58.11    6.48
  -2  -7   9  186.86   10.78
   2  -7  -9  198.29   11.64
   2  -7  -9  204.71    9.90
   2  -7  -9  183.72   11.80
  -2  -7   9  178.49   13.27
  -2  -7   9  182.39    7.78
  -2  -7   8  126.67    8.98
   2  -7  -8   93.42    8.54
   2  -7  -8   85.60    6.27
  -2  -7   8   99.07    8.69
  -2  -7   8  109.32   10.61
   2  -7  -8  111.89    9.28
  -2  -7   8   96.83    6.12
   2  -7  -8  100.32    6.94
   2  -7  -7  805.69   21.56
  -2  -7   7  797.82   21.62
  -2  -7   7  833.99   24.12
   2  -7  -7  800.82   23.86
   2  -7  -7  843.33   21.46
  -2  -7   7  815.98   24.53
  -2  -7   7  886.79   27.51
   2  -7  -7  793.38   23.96
   2  -7  -7  791.13   24.22
   2  -7  -6   60.66    4.95
  -2  -7   6   53.03    6.71
   2  -7  -6   58.73    6.27
   2  -7  -6   68.18    5.18
  -2  -7   6   53.79    5.46
  -2  -7   6   63.83    6.93
  -2  -7   6   52.35    7.48
   2  -7  -6   59.07    6.13
   2  -7  -6   65.62    6.30
  -2  -7   5  200.84   10.04
   2  -7  -5  207.26    8.25
  -2  -7   5  203.49   10.49
   2  -7  -5  203.10    9.30
   2  -7  -5  207.74    8.42
  -2  -7   5  212.55   10.16
  -2  -7   5  188.94   11.01
   2  -7  -5  215.40    9.18
   2  -7  -5  211.80    9.13
  -2  -7   4   59.11    5.37
   2  -7  -4   64.99    5.04
   2  -7  -4   57.44    5.22
   2  -7  -4   69.61    4.92
  -2  -7   4   64.87    5.91
  -2  -7   4   65.76    6.44
   2  -7  -4   67.63    4.99
   2  -7  -4   68.18    4.62
  -2  -7   4   61.45    6.48
  -2  -7   3  120.30    8.06
  -2  -7   3  135.64    7.98
  -2  -7   3  112.78    6.72
  -2  -7   3  116.13    6.43
   2  -7  -3  128.76    7.06
  -2  -7   3  123.96    8.99
   2  -7  -3  131.24    6.08
  -2  -7   2  726.45   18.80
  -2  -7   2  722.47   20.47
  -2  -7   2  743.80   18.90
   2  -7  -2  703.06   18.26
   2  -7  -2  739.58   19.68
   2  -7  -1  172.47    7.74
  -2  -7   1  173.90    7.27
   2  -7  -1  178.31    6.75
  -2  -7   1  177.31    7.19
   2  -7  -1  172.36    8.24
   2  -7   0  201.94    8.90
  -2  -7   0  223.68    8.28
   2  -7   0  214.59    7.44
  -2  -7   0  214.70    7.56
   2  -7   0  213.63    9.38
   2  -7   1  416.03   14.12
  -2  -7  -1  435.85   12.97
   2  -7   1  446.50   11.60
   2  -7   1  425.73   14.53
  -2  -7  -1  436.08   11.76
  -2  -7  -2   82.00    4.44
   2  -7   2   94.94    7.00
  -2  -7  -2   90.73    5.95
   2  -7   2   91.60    6.94
  -2  -7  -2   79.30    4.30
   2  -7   2   88.07    4.24
   2  -7   3  810.46   17.76
   2  -7   3  781.95   23.19
  -2  -7  -3  821.31   19.14
  -2  -7  -3  799.80   22.09
   2  -7   3  790.09   23.44
  -2  -7  -3  739.74   20.95
  -2  -7  -3  785.97   18.72
   2  -7   4   28.81    2.39
  -2  -7  -4   26.37    3.80
  -2  -7  -4   28.47    5.40
  -2  -7  -4   28.22    5.02
   2  -7   4   21.62    5.35
   2  -7   4   20.56    5.93
  -2  -7  -4   29.42    3.30
   2  -7   5   51.67    2.49
  -2  -7  -5   51.77    5.06
  -2  -7  -5   53.94    5.16
  -2  -7  -5   52.90    6.64
   2  -7   5   51.78    7.22
   2  -7   5   59.02    7.78
   2  -7   5   53.89    3.53
  -2  -7  -5   51.24    4.38
  -2  -7  -6   11.52    3.58
   2  -7   6   18.80    6.18
  -2  -7  -6   13.00    4.44
  -2  -7  -6   23.25    6.41
   2  -7   6   12.43    6.98
  -2  -7  -6   18.99    4.26
  -2  -7  -7   67.69    5.61
  -2  -7  -7   65.00    6.80
   2  -7   7   71.89    8.53
   2  -7   7   58.19    9.35
  -2  -7  -7   70.04    5.78
  -2  -7  -8  159.63   10.14
  -2  -7  -8  157.94    8.56
   2  -7   8  176.93   12.22
   2  -7   8  185.68   13.96
  -2  -7  -8  176.90    8.42
  -2  -7  -9    2.50    5.07
   2  -7   9    7.52    7.10
   2  -7   9    6.48    7.53
  -2  -7  -9   -5.75    4.63
  -2  -7  -9    1.68    5.99
   2  -7  10   10.86    9.19
  -2  -7 -10    5.27    5.02
  -2  -7 -10    8.82    6.25
   2  -7  11    4.95    8.81
  -2  -7 -11   15.91    5.98
  -2  -7 -11   14.13    7.14
   2  -6 -13   77.69    8.59
  -2  -6  13   67.18   12.36
  -2  -6  13   76.20    4.42
   2  -6 -13   83.44   10.76
  -2  -6  12   12.96    2.83
  -2  -6  12   10.13    6.01
  -2  -6  12    3.12    8.84
   2  -6 -12   15.56    7.32
   2  -6 -12   13.85    5.83
   2  -6 -11    5.52    6.73
   2  -6 -11   12.07    5.31
  -2  -6  11   15.20    8.39
  -2  -6  11   13.21    2.89
   2  -6 -10  114.92   10.12
  -2  -6  10  109.25    8.48
   2  -6 -10  104.25    8.13
  -2  -6  10  107.65   11.64
  -2  -6  10  113.58    5.59
   2  -6  -9   67.17    5.81
  -2  -6   9   77.10    4.94
   2  -6  -9   75.34    8.50
  -2  -6   9   86.80    7.84
  -2  -6   9   86.78   10.38
   2  -6  -9   84.89    8.92
   2  -6  -9   67.88    6.39
  -2  -6   8  123.70    8.65
   2  -6  -8  137.66    9.76
   2  -6  -8  133.18    7.81
   2  -6  -8  144.33    9.90
  -2  -6   8  126.46    6.57
   2  -6  -8  141.45    7.17
   2  -6  -7  116.73    6.30
  -2  -6   7  101.19    7.74
   2  -6  -7  107.67    7.98
   2  -6  -7  115.81    6.83
  -2  -6   7  118.33    8.38
   2  -6  -7  106.46    8.29
  -2  -6   7  105.47    9.62
  -2  -6   7  111.51    6.34
  -2  -6   6  206.76   10.22
   2  -6  -6  220.58   10.44
   2  -6  -6  215.61    8.50
  -2  -6   6  231.72   10.66
  -2  -6   6  238.49   11.88
   2  -6  -6  207.35    9.82
   2  -6  -6  215.78    8.65
  -2  -6   6  208.96    9.03
  -2  -6   5  260.08   10.59
   2  -6  -5  269.74    9.28
  -2  -6   5  261.73   11.27
   2  -6  -5  281.40   10.93
   2  -6  -5  253.96    9.21
  -2  -6   5  263.50   12.01
  -2  -6   5  265.53   10.93
   2  -6  -5  266.46   10.25
   2  -6  -5  264.92   10.40
  -2  -6   4   65.12    5.15
   2  -6  -4   55.55    4.72
   2  -6  -4   57.43    5.29
   2  -6  -4   54.48    4.41
  -2  -6   4   58.79    5.21
  -2  -6   4   65.34    6.22
   2  -6  -4   64.56    4.60
  -2  -6   4   78.59    6.40
   2  -6  -4   63.94    4.30
  -2  -6   3  390.01   14.08
   2  -6  -3  415.68   12.97
   2  -6  -3  418.31   11.76
  -2  -6   3  401.34   13.72
  -2  -6   3  400.40   12.60
   2  -6  -3  415.35   11.69
  -2  -6   3  414.51   12.39
  -2  -6   2 1091.30   26.69
  -2  -6   2 1027.12   24.03
  -2  -6   2 1003.57   25.40
   2  -6  -2 1028.17   24.95
   2  -6  -2 1017.41   23.61
  -2  -6   2 1038.78   24.04
  -2  -6   1 1978.30   41.65
   2  -6  -1 1965.38   41.07
  -2  -6   1 1992.59   41.30
   2  -6  -1 1981.53   43.19
   2  -6   0  147.39    7.02
  -2  -6   0  159.42    6.52
   2  -6   0  163.07    5.92
   2  -6   0  161.50    7.70
  -2  -6   0  161.56    5.87
  -2  -6  -1  207.47    6.68
   2  -6   1  207.40    9.13
  -2  -6  -1  214.62    8.07
   2  -6   1  205.27    8.83
   2  -6   1  220.33    6.71
  -2  -6  -1  204.60    6.54
   2  -6   2  857.99   23.22
  -2  -6  -2  844.57   19.38
  -2  -6  -2  852.98   22.10
   2  -6   2  851.86   23.11
  -2  -6  -2  868.91   19.30
   2  -6   2  880.27   18.91
   2  -6   3  157.25    4.89
   2  -6   3  145.95    8.48
  -2  -6  -3  154.28    6.11
  -2  -6  -3  165.06    8.79
   2  -6   3  136.82    8.68
  -2  -6  -3  148.58    7.61
  -2  -6  -3  159.73    5.86
   2  -6   4  174.92    6.86
  -2  -6  -4  193.51    7.15
  -2  -6  -4  194.43    7.78
   2  -6   4  194.72   10.19
  -2  -6  -4  197.96    9.62
   2  -6   4  195.83   10.89
   2  -6   4  191.29    5.18
   2  -6   5  391.10    9.09
  -2  -6  -5  430.94   13.43
  -2  -6  -5  411.55   12.23
   2  -6   5  414.23   15.90
  -2  -6  -5  393.15   15.18
   2  -6   5  417.96   16.93
  -2  -6  -5  432.16   12.84
   2  -6   5  398.75    8.52
  -2  -6  -6  105.56    7.33
   2  -6   6  108.20    9.11
  -2  -6  -6   96.64    6.15
   2  -6   6   93.96    9.66
  -2  -6  -6  115.04    9.29
  -2  -6  -6  107.06    6.41
   2  -6   7  302.24   14.63
  -2  -6  -7  294.41   10.57
   2  -6   7  296.88   15.87
  -2  -6  -7  281.92   14.49
  -2  -6  -7  295.17   11.46
  -2  -6  -8  115.85    8.11
  -2  -6  -8  130.86    6.97
   2  -6   8  123.48   12.07
  -2  -6  -8  143.80    8.39
  -2  -6  -9   63.97    7.13
   2  -6   9   53.31   10.48
  -2  -6  -9   55.60    5.10
  -2  -6  -9   72.29    6.99
   2  -6  10    8.95    8.56
  -2  -6 -10   33.71    6.27
   2  -6  11   73.73   11.87
  -2  -6 -11   60.02    7.63
  -2  -5  13   31.03    3.47
  -2  -5  13   42.58    6.64
  -2  -5  13   37.65   10.45
   2  -5 -13   28.30    6.83
   2  -5 -12  356.85   15.62
  -2  -5  12  372.57   14.70
  -2  -5  12  363.58   20.00
  -2  -5  12  354.78   10.53
   2  -5 -11  126.81    9.37
  -2  -5  11  136.64   12.77
  -2  -5  11  142.46    6.01
  -2  -5  11  125.37    8.83
  -2  -5  10    7.58    2.67
   2  -5 -10   13.07    3.89
   2  -5 -10    5.05    6.78
  -2  -5  10    8.87    7.51
   2  -5 -10    6.31    4.85
  -2  -5  10    7.24    5.38
   2  -5  -9   11.36    3.90
  -2  -5   9    8.35    2.74
  -2  -5   9    8.03    7.23
   2  -5  -9    1.36    5.76
   2  -5  -9   12.65    4.82
  -2  -5   9   10.09    5.29
  -2  -5   8   22.10    3.37
   2  -5  -8   26.18    3.83
  -2  -5   8   27.88    5.65
  -2  -5   8   25.64    6.77
   2  -5  -8   24.95    6.11
   2  -5  -8   22.19    4.62
   2  -5  -7  140.25    6.83
  -2  -5   7  155.76    8.66
   2  -5  -7  154.66    9.32
   2  -5  -7  133.69    7.37
   2  -5  -7  136.49    8.80
  -2  -5   7  138.37   10.07
  -2  -5   7  139.32    6.58
   2  -5  -6  274.71    9.24
  -2  -5   6  275.25   11.36
   2  -5  -6  245.09   11.21
   2  -5  -6  263.66    9.64
  -2  -5   6  268.19   11.22
  -2  -5   6  278.64   12.78
   2  -5  -6  275.72   11.29
  -2  -5   6  267.99    9.69
  -2  -5   5  597.71   17.66
   2  -5  -5  592.13   17.32
   2  -5  -5  564.87   15.38
  -2  -5   5  570.52   17.05
  -2  -5   5  558.78   18.30
   2  -5  -5  560.19   16.45
  -2  -5   5  599.30   16.59
   2  -5  -5  593.56   15.55
   2  -5  -4  252.78    9.17
  -2  -5   4  269.74    9.47
   2  -5  -4  241.01    9.72
   2  -5  -4  264.83    8.66
  -2  -5   4  263.47   10.65
  -2  -5   4  261.15    9.79
   2  -5  -4  261.55    9.06
   2  -5  -4  244.89    8.45
  -2  -5   4  259.21   10.23
  -2  -5   3   95.54    6.72
   2  -5  -3  111.33    6.11
   2  -5  -3   97.46    5.09
  -2  -5   3  100.17    6.45
  -2  -5   3  105.26    5.76
   2  -5  -3  108.16    4.98
  -2  -5   3   85.16    4.97
  -2  -5   2 2893.34   62.18
  -2  -5   2 2963.88   59.94
  -2  -5   2 3009.88   61.53
   2  -5  -2 2966.62   59.56
   2  -5  -2 2912.21   60.79
  -2  -5   2 3017.20   59.91
  -2  -5   1  192.71    6.46
   2  -5  -1  186.77    7.68
  -2  -5   1  203.14    8.88
  -2  -5   1  195.65    6.72
   2  -5   0 2464.99   51.84
  -2  -5   0 2550.66   51.31
   2  -5   0 2559.29   50.35
   2  -5   0 2534.18   52.84
  -2  -5   0 2477.98   49.95
   2  -5   1   42.69    2.85
  -2  -5  -1   48.18    2.87
  -2  -5  -1   41.53    4.15
   2  -5   1   39.03    4.39
   2  -5   1   46.88    4.65
  -2  -5  -1   40.23    2.65
   2  -5   2  548.40   12.09
  -2  -5  -2  543.22   15.92
  -2  -5  -2  536.59   12.79
   2  -5   2  512.55   15.85
   2  -5   2  486.44   15.70
  -2  -5  -2  511.33   14.69
  -2  -5  -2  540.09   12.65
  -2  -5  -3 1408.32   31.09
   2  -5   3 1427.79   34.60
  -2  -5  -3 1466.84   30.67
  -2  -5  -3 1412.13   33.43
   2  -5   3 1463.70   28.86
  -2  -5  -4   43.83    5.53
  -2  -5  -4   47.77    4.38
   2  -5   4   48.61    5.78
   2  -5   4   47.80    2.68
   2  -5   4   43.86    1.77
  -2  -5  -4   44.04    3.69
  -2  -5  -5   23.49    3.71
   2  -5   5   12.19    4.88
  -2  -5  -5   19.88    5.04
  -2  -5  -5   19.26    3.48
   2  -5   6   75.43    7.77
  -2  -5  -6   82.98    5.21
  -2  -5  -6   73.09    5.63
  -2  -5  -6   71.00    7.80
  -2  -5  -7  244.46   10.57
  -2  -5  -7  249.92   13.47
  -2  -5  -7  238.33   10.51
  -2  -5  -8  356.03   13.91
  -2  -5  -8  357.32   13.93
  -2  -5  -8  370.73   11.62
  -2  -5  -9    2.19    5.20
  -2  -5  -9    4.80    5.09
  -2  -5  -9    0.20    3.26
  -2  -5 -10   49.93    7.02
  -2  -5 -10   54.38    4.78
  -2  -5 -11  104.69    9.30
   2  -4 -13  146.05   11.07
  -2  -4  13  156.99   14.73
  -2  -4  13  154.25    6.46
  -2  -4  13  137.13    9.14
  -2  -4  12   81.65    4.78
   2  -4 -12   88.56    8.67
  -2  -4  12   72.88    7.43
   2  -4 -11   32.37    4.57
  -2  -4  11   32.03    3.40
  -2  -4  11   29.79    8.75
   2  -4 -11   30.00    6.45
  -2  -4  11   27.56    6.01
   2  -4 -10   42.02    4.80
  -2  -4  10   53.41    3.90
  -2  -4  10   43.96    6.32
   2  -4 -10   39.23    7.59
  -2  -4  10   44.83    8.89
   2  -4 -10   49.96    6.69
   2  -4  -9  121.59    8.62
  -2  -4   9  144.86    8.67
  -2  -4   9  123.58   11.10
   2  -4  -9  119.08    9.81
  -2  -4   9  129.56    5.79
   2  -4  -9  125.09    6.72
   2  -4  -8  162.09    8.65
   2  -4  -8  163.20   10.13
  -2  -4   8  137.99   10.79
  -2  -4   8  148.99    6.37
   2  -4  -8  158.68    7.21
  -2  -4   8  149.68    8.52
   2  -4  -7   17.42    3.40
  -2  -4   7   25.54    3.21
  -2  -4   7   29.56    5.07
   2  -4  -7   24.70    5.21
  -2  -4   7   22.02    6.02
   2  -4  -7   28.21    4.34
   2  -4  -6  723.03   17.61
  -2  -4   6  685.72   19.53
   2  -4  -6  682.62   18.36
   2  -4  -6  670.31   19.77
  -2  -4   6  693.59   21.50
  -2  -4   6  698.50   17.64
   2  -4  -5  169.68    6.59
  -2  -4   5  169.35    8.46
   2  -4  -5  150.36    8.15
   2  -4  -5  164.35    7.00
  -2  -4   5  155.84    8.79
  -2  -4   5  152.54    7.66
   2  -4  -5  165.77    7.68
  -2  -4   5  162.27    7.08
   2  -4  -4  112.66    6.73
   2  -4  -4  112.97    5.31
  -2  -4   4  113.50    6.22
  -2  -4   4  113.81    6.88
   2  -4  -4  108.06    5.70
  -2  -4   4  115.77    6.28
   2  -4  -4  116.38    5.38
   2  -4  -3  605.05   14.46
  -2  -4   3  592.86   16.74
   2  -4  -3  565.85   15.58
   2  -4  -3  610.03   14.59
  -2  -4   3  610.58   16.39
  -2  -4   3  605.29   15.38
   2  -4  -3  568.29   14.36
  -2  -4   3  604.31   15.04
   2  -4  -2 1534.92   31.69
   2  -4  -2 1563.05   32.85
  -2  -4   2 1500.22   34.08
  -2  -4   2 1501.68   31.84
  -2  -4   2 1519.11   33.11
   2  -4  -2 1491.66   31.59
  -2  -4   2 1494.23   35.45
  -2  -4   2 1513.93   31.79
  -2  -4   1  382.66   11.80
  -2  -4   1  371.32    9.27
   2  -4  -1  355.68   10.60
  -2  -4   1  381.51   13.51
   2  -4  -1  358.30    9.75
  -2  -4   1  375.40    9.66
   2  -4   0  838.39   18.31
  -2  -4   0  856.02   17.79
   2  -4   0  829.80   20.30
  -2  -4   0  876.60   20.99
  -2  -4   0  866.45   19.26
   2  -4   1  159.48    7.23
  -2  -4  -1  164.92    4.81
  -2  -4  -1  170.26    7.05
  -2  -4  -1  171.18    4.90
   2  -4   1  169.68    4.99
   2  -4   2 3771.62   76.72
  -2  -4  -2 3789.39   73.31
   2  -4   2 3681.50   72.03
  -2  -4  -2 3688.09   75.51
  -2  -4  -2 3821.31   73.09
   2  -4   3   56.25    5.27
   2  -4   3   50.88    1.92
  -2  -4  -3   50.30    3.61
  -2  -4  -3   51.44    5.12
   2  -4   4  853.39   23.24
  -2  -4  -4  856.37   20.44
  -2  -4  -4  819.46   22.89
  -2  -4  -5  708.93   17.32
  -2  -4  -5  698.66   21.37
  -2  -4  -5  668.53   18.42
  -2  -4  -6   64.60    4.36
  -2  -4  -6   59.34    5.40
  -2  -4  -6   62.78    7.19
  -2  -4  -6   63.57    5.61
  -2  -4  -7  256.02   10.96
  -2  -4  -7  270.05    9.03
  -2  -4  -7  254.26   13.59
  -2  -4  -7  254.33   11.30
  -2  -4  -8    6.57    4.94
  -2  -4  -8    7.03    3.14
  -2  -4  -8   18.21    7.23
  -2  -4  -8    9.96    4.92
  -2  -4  -9   46.05    6.81
  -2  -4  -9   53.83    4.44
  -2  -4  -9   50.01    6.77
  -2  -4 -10    7.02    5.88
  -2  -4 -10    6.38    3.06
  -2  -4 -11   42.92    7.61
  -2  -4 -12  130.99   10.95
  -2  -3  14   26.19    9.51
  -2  -3  14   19.89    3.48
  -2  -3  13   23.96    3.60
  -2  -3  13   19.38    9.25
   2  -3 -13   21.58    7.29
  -2  -3  13   29.58    6.01
   2  -3 -12   51.31    5.31
  -2  -3  12   62.63    4.43
  -2  -3  12   58.08    9.86
   2  -3 -12   49.38    7.97
  -2  -3  12   62.30    6.94
   2  -3 -11   62.32    5.48
  -2  -3  11   66.95    4.51
  -2  -3  11   74.16    7.14
  -2  -3  11   56.31    9.49
   2  -3 -11   58.74    8.03
  -2  -3  10   20.83    3.03
   2  -3 -10   18.59    3.83
  -2  -3  10   26.05    5.37
  -2  -3  10   19.93    8.13
   2  -3 -10   23.35    6.93
  -2  -3  10   23.63    7.85
   2  -3 -10   25.81    6.01
   2  -3  -9  225.32   11.53
  -2  -3   9  245.41   10.67
  -2  -3   9  222.24   13.53
   2  -3  -9  240.58   12.81
   2  -3  -9  222.78    8.83
  -2  -3   9  230.53    7.88
  -2  -3   8  316.33   15.74
   2  -3  -8  317.21   12.63
  -2  -3   8  296.69   11.87
  -2  -3   8  318.83   14.97
   2  -3  -8  333.52   13.95
  -2  -3   8  331.97    9.70
   2  -3  -8  307.45   10.34
  -2  -3   7 1326.74   36.16
   2  -3  -7 1349.40   32.22
  -2  -3   7 1278.05   31.65
  -2  -3   7 1330.75   34.97
   2  -3  -7 1340.47   33.31
   2  -3  -7 1321.79   29.62
  -2  -3   7 1346.23   29.21
   2  -3  -6   35.28    3.54
  -2  -3   6   36.91    3.27
  -2  -3   6   26.44    4.45
  -2  -3   6   39.90    5.62
   2  -3  -6   35.05    4.92
  -2  -3   6   39.06    6.54
   2  -3  -6   40.28    4.51
   2  -3  -5  251.88    8.19
  -2  -3   5  268.33   11.83
   2  -3  -5  268.07    9.22
   2  -3  -5  240.11    9.61
  -2  -3   5  251.42   10.63
  -2  -3   5  266.38    8.68
   2  -3  -4  688.64   18.68
   2  -3  -4  705.19   16.99
  -2  -3   4  708.37   18.78
   2  -3  -4  692.25   17.49
   2  -3  -4  698.97   16.61
   2  -3  -3  174.42    6.10
  -2  -3   3  174.26    7.81
   2  -3  -3  183.90    7.14
   2  -3  -3  187.05    6.14
  -2  -3   3  198.63    7.49
  -2  -3   3  196.67    6.77
   2  -3  -3  176.85    6.15
  -2  -3   3  183.06    6.34
   2  -3  -2  146.80    5.08
   2  -3  -2  153.03    5.85
  -2  -3   2  149.81    6.87
  -2  -3   2  144.11    5.82
  -2  -3   2  150.76    5.18
  -2  -3   2  146.67    6.97
   2  -3  -2  152.37    4.98
  -2  -3   2  144.91    4.98
   2  -3  -1  334.72    9.48
  -2  -3   1  339.78   10.50
  -2  -3   1  341.55    8.08
  -2  -3   1  339.68   11.80
   2  -3  -1  337.37    8.72
  -2  -3   1  358.35    8.59
  -2  -3   0 1136.72   25.11
  -2  -3   0 1101.17   21.93
   2  -3   0 1100.66   24.67
  -2  -3   0 1112.49   22.15
  -2  -3   0 1160.29   23.88
  -2  -3  -1  162.53    4.39
   2  -3   1  167.47    6.76
  -2  -3  -1  161.20    6.39
  -2  -3  -1  160.38    4.41
   2  -3   1  155.39    4.37
   2  -3   2  198.33    8.04
  -2  -3  -2  204.85    6.21
  -2  -3  -2  203.14    7.75
   2  -3   2  201.92    4.85
  -2  -3  -3  365.41   12.30
   2  -3   3  379.42   12.42
  -2  -3  -3  377.47   10.66
  -2  -3  -4  244.02   10.79
  -2  -3  -4  242.71    8.42
  -2  -3  -4  248.48    9.12
  -2  -3  -5  182.64    7.81
  -2  -3  -5  182.71    8.36
  -2  -3  -5  181.37    9.81
  -2  -3  -5  174.74    6.45
  -2  -3  -6  176.92    8.43
  -2  -3  -6  185.63    9.19
  -2  -3  -6  180.74    6.64
  -2  -3  -7   89.29    7.03
  -2  -3  -7   95.99    9.16
  -2  -3  -7   87.28    4.73
  -2  -3  -8   27.08    5.59
  -2  -3  -8   21.61    5.95
  -2  -3  -8   19.48    7.36
  -2  -3  -8   30.70    3.43
  -2  -3  -9  112.39    8.84
  -2  -3  -9  122.79    5.70
  -2  -3  -9  125.44    9.58
  -2  -3 -10  100.68    5.19
  -2  -3 -10   90.00    9.11
  -2  -3 -11   24.06    7.36
  -2  -3 -12   15.57    7.24
  -2  -2  14   55.94   10.70
  -2  -2  14   59.36    5.00
   2  -2 -14   58.60    9.55
  -2  -2  13   85.43    7.37
  -2  -2  13  106.39   11.72
  -2  -2  13   85.37    5.43
   2  -2 -13   79.30    9.66
  -2  -2  12   54.16    6.45
  -2  -2  12   54.67    9.38
   2  -2 -12   46.40    5.19
  -2  -2  12   47.37    4.40
   2  -2 -12   45.99    8.14
  -2  -2  11   77.37    6.88
  -2  -2  11   68.30    9.73
  -2  -2  11   70.08    4.78
   2  -2 -11   71.89    5.60
   2  -2 -11   82.31    8.92
  -2  -2  10   44.07    5.96
   2  -2 -10   48.60    8.15
  -2  -2  10   29.71    7.64
   2  -2 -10   41.07    4.53
  -2  -2  10   39.64    3.73
   2  -2 -10   40.67    7.05
  -2  -2  10   39.44    9.09
  -2  -2   9    2.24    4.35
  -2  -2   9    0.49    5.38
   2  -2  -9   -0.43    5.55
  -2  -2   9    0.77    2.41
   2  -2  -9    2.83    2.84
   2  -2  -9    4.76    5.21
  -2  -2   9   -3.54    7.16
  -2  -2   8  116.05    7.34
  -2  -2   8  122.05    9.22
   2  -2  -8  114.45    8.66
   2  -2  -8  114.10    5.92
  -2  -2   8  117.11    5.28
   2  -2  -8  110.82    7.91
  -2  -2   8  119.91   10.30
  -2  -2   7   73.83    5.96
  -2  -2   7   75.22    7.00
   2  -2  -7   68.21    6.64
  -2  -2   7   72.77    4.13
   2  -2  -7   63.36    4.38
   2  -2  -7   65.62    6.06
  -2  -2   7   73.67    7.96
  -2  -2   6  144.23    7.23
   2  -2  -6  144.53    7.60
  -2  -2   6  138.56    9.44
   2  -2  -6  131.81    5.75
  -2  -2   6  134.58    5.58
  -2  -2   6  154.19    8.91
   2  -2  -6  158.56    8.18
   2  -2  -5  834.04   20.55
  -2  -2   5  795.50   22.94
   2  -2  -5  839.78   18.99
  -2  -2   5  786.67   18.84
   2  -2  -5  811.69   20.83
  -2  -2   5  831.47   21.87
   2  -2  -4 3247.67   64.07
  -2  -2   4 3101.55   66.53
   2  -2  -4 3105.36   64.23
  -2  -2   4 3192.96   65.44
   2  -2  -4 3206.96   63.16
   2  -2  -3  144.32    6.34
   2  -2  -3  140.52    5.13
  -2  -2   3  144.88    6.74
  -2  -2   3  155.03    6.21
  -2  -2   3  140.83    6.49
   2  -2  -3  141.79    5.08
   2  -2  -2  883.44   18.94
  -2  -2   2  847.31   20.42
  -2  -2   2  881.78   19.40
  -2  -2   2  885.51   20.50
   2  -2  -2  885.69   18.57
  -2  -2   2  868.75   18.40
   2  -2  -2  876.74   19.64
  -2  -2   1 3725.99   74.06
   2  -2  -1 3748.59   72.23
  -2  -2   1 3809.37   75.12
  -2  -2   1 3669.84   71.83
   2  -2  -1 3794.85   73.12
   2  -2   0  182.87    6.13
  -2  -2   0  185.35    6.60
  -2  -2   0  186.52    7.84
  -2  -2   0  192.90    4.16
  -2  -2  -1 1642.21   34.01
   2  -2   1 1662.90   34.83
  -2  -2  -1 1663.68   32.46
   2  -2   1 1635.38   32.47
  -2  -2  -1 1656.70   34.41
  -2  -2  -1 1661.14   32.71
  -2  -2  -2 4841.60   95.26
   2  -2   2 4952.03   93.84
  -2  -2  -2 5000.63   97.63
  -2  -2  -2 4901.07   95.91
  -2  -2  -3   97.69    6.23
  -2  -2  -3   80.04    4.46
  -2  -2  -3   81.73    5.06
  -2  -2  -4 1342.13   32.87
  -2  -2  -4 1337.15   30.20
  -2  -2  -4 1399.66   31.69
  -2  -2  -5  852.01   21.75
  -2  -2  -5  879.97   23.36
  -2  -2  -5  873.07   24.61
  -2  -2  -5  872.83   19.41
  -2  -2  -6   33.75    4.63
  -2  -2  -6   47.77    5.90
  -2  -2  -6   47.99    6.90
  -2  -2  -6   47.41    3.19
  -2  -2  -7   30.00    5.19
   2  -2   7   33.64    5.67
  -2  -2  -7   16.91    5.46
  -2  -2  -7   22.92    6.78
  -2  -2  -7   29.94    3.00
  -2  -2  -8   51.30    6.45
  -2  -2  -8   55.23    7.41
  -2  -2  -8   52.32    8.58
  -2  -2  -8   52.01    3.56
  -2  -2  -9   51.60    7.06
  -2  -2  -9   54.18    3.75
  -2  -2  -9   60.67    8.19
  -2  -2 -10   56.08    8.21
  -2  -2 -11   45.89    8.26
  -2  -2 -12   90.11   10.57
  -2  -1  14   10.97    8.29
   2  -1 -14   28.64    9.10
  -2  -1  13   19.77    5.31
  -2  -1  13   16.58    8.48
  -2  -1  13   26.44    4.00
   2  -1 -13   27.94    8.12
  -2  -1  12   61.45    6.55
  -2  -1  12   61.29    9.98
  -2  -1  12   64.45    4.93
   2  -1 -12   70.81    5.83
   2  -1 -12   67.02    9.21
  -2  -1  11   42.52    5.91
   2  -1 -11   54.20    8.10
  -2  -1  11   46.27    8.30
  -2  -1  11   35.75    4.01
   2  -1 -11   42.94    4.69
  -2  -1  10    9.69    4.71
   2  -1 -10    7.64    5.54
  -2  -1  10   14.92    7.93
   2  -1 -10   14.52    6.18
   2  -1 -10   11.25    6.60
  -2  -1  10    9.56    6.84
   2  -1 -10   12.10    3.54
  -2  -1  10    4.93    2.92
  -2  -1   9  470.92   15.27
   2  -1  -9  506.16   17.17
   2  -1  -9  537.83   18.75
  -2  -1   9  485.04   18.92
  -2  -1   9  466.75   13.03
   2  -1  -9  481.88   13.95
   2  -1  -9  461.69   17.91
  -2  -1   9  490.35   20.93
  -2  -1   8  316.83   11.71
  -2  -1   8  344.87   14.52
   2  -1  -8  324.38   13.70
  -2  -1   8  311.43    9.63
   2  -1  -8  337.84   10.53
   2  -1  -8  331.63   14.05
  -2  -1   8  369.58   16.64
  -2  -1   7  360.07   11.89
   2  -1  -7  359.45   13.57
  -2  -1   7  337.69   13.87
  -2  -1   7  353.78    9.91
   2  -1  -7  315.93   10.19
  -2  -1   7  350.74   15.30
   2  -1  -7  346.88   13.24
  -2  -1   6   21.46    4.14
   2  -1  -6   31.36    5.07
  -2  -1   6   22.14    4.91
   2  -1  -6   29.27    3.17
  -2  -1   6   31.32    2.98
  -2  -1   6   23.58    6.04
   2  -1  -6   27.56    4.80
   2  -1  -5  302.65   10.52
  -2  -1   5  279.73   10.71
   2  -1  -5  283.79    8.61
  -2  -1   5  269.11   11.92
   2  -1  -5  292.55   10.46
  -2  -1   4  201.55    7.89
   2  -1  -4  196.12    6.44
  -2  -1   4  198.27    8.88
   2  -1  -4  194.68    7.39
  -2  -1   3 2322.12   47.97
   2  -1  -3 2325.14   46.90
  -2  -1   3 2328.77   48.48
  -2  -1   3 2310.50   47.40
   2  -1  -3 2371.61   46.69
  -2  -1   3 2308.33   47.01
  -2  -1   2 8113.90  158.62
   2  -1  -2 8120.05  158.12
  -2  -1   2 8274.09  157.90
  -2  -1   2 8253.95  157.29
  -2  -1   2 8411.36  158.28
   2  -1  -2 8187.72  157.48
   2  -1  -1  689.64   15.19
   2  -1  -1  699.95   15.23
  -2  -1   1  702.35   16.32
  -2  -1   1  704.04   13.99
  -2  -1   1  701.30   16.18
  -2  -1   0 6602.18  122.34
  -2  -1   0 6380.88  124.04
  -2  -1  -1  291.87    7.63
  -2  -1  -1  303.41    7.23
  -2  -1  -1  299.53    7.85
  -2  -1  -1  307.34    8.54
  -2  -1  -1  300.26    9.18
  -2  -1  -2  162.50    6.39
  -2  -1  -2  170.52    6.89
  -2  -1  -2  171.10    4.65
  -2  -1  -2  162.98    5.55
  -2  -1  -3 1710.09   36.17
  -2  -1  -3 1726.81   37.73
  -2  -1  -3 1692.86   38.14
  -2  -1  -4  288.72    9.75
  -2  -1  -4  272.06   11.17
  -2  -1  -4  288.63   11.07
  -2  -1  -5   14.73    3.74
  -2  -1  -5   16.42    1.96
  -2  -1  -5   16.33    4.90
  -2  -1  -5   15.27    4.66
  -2  -1  -6  354.37   14.23
  -2  -1  -6  348.30    8.85
  -2  -1  -6  313.19   12.13
  -2  -1  -6  351.99   14.56
   2  -1   6  352.73   15.57
  -2  -1  -7  624.80   21.00
  -2  -1  -7  621.71   14.22
  -2  -1  -7  618.65   18.89
  -2  -1  -7  591.47   21.25
   2  -1   7  602.12   22.55
  -2  -1  -8  283.19   12.63
  -2  -1  -8  283.12    8.05
  -2  -1  -8  295.34   14.94
  -2  -1  -8  318.24   14.94
  -2  -1  -9  249.43   12.62
  -2  -1  -9  246.97    7.50
  -2  -1  -9  262.16   14.33
  -2  -1 -10   93.56   10.44
  -2  -1 -11   63.50    9.61
  -2  -1 -12   13.89    8.35
  -2   0  14   20.20    9.03
   2   0 -14   31.23    9.27
  -2   0  13    8.87    4.88
  -2   0  13    0.66    7.29
  -2   0  13    1.60    3.18
   2   0 -13   11.46    7.57
  -2   0  12    3.03    4.54
  -2   0  12    7.98    6.95
  -2   0  12    1.54    3.17
   2   0 -12    4.74    3.99
   2   0 -12    0.59    7.29
   2   0 -11  107.64   10.90
  -2   0  11  109.96    7.58
  -2   0  11   99.47   10.25
   2   0 -11  106.09    6.58
  -2   0  10  723.87   18.41
   2   0 -10  774.39   25.34
  -2   0  10  723.91   27.18
  -2   0  10  691.95   20.24
   2   0 -10  739.84   23.42
  -2   0  10  712.68   24.50
   2   0 -10  728.54   24.20
   2   0 -10  709.06   19.05
  -2   0   9   11.52    7.43
   2   0  -9    0.93    5.85
  -2   0   9    5.23    4.14
   2   0  -9   -0.73    4.75
   2   0  -9    0.41    5.39
  -2   0   9   -1.82    5.55
   2   0  -9    0.41    3.05
  -2   0   9    1.57    2.60
   2   0  -8  115.41    8.86
  -2   0   8  126.46   10.23
  -2   0   8  108.76    6.92
   2   0  -8  106.48    7.62
  -2   0   8  105.58    8.53
   2   0  -8  115.35    8.41
  -2   0   8  108.25    5.30
   2   0  -8  108.51    5.73
   2   0  -7  240.21   11.47
  -2   0   7  251.62   12.68
  -2   0   7  263.28    9.77
  -2   0   7  246.78   11.32
   2   0  -7  250.24   11.19
   2   0  -7  253.25    8.49
  -2   0   7  243.68    8.00
  -2   0   6  204.02   10.73
   2   0  -6  227.04   10.32
  -2   0   6  219.69    8.58
  -2   0   6  222.36    9.88
   2   0  -6  183.17    9.09
  -2   0   6  198.67    6.90
   2   0  -6  210.13    7.37
  -2   0   5   45.76    5.03
  -2   0   5   55.99    6.29
   2   0  -5   42.62    3.50
  -2   0   4   97.53    5.35
  -2   0   4   99.16    6.38
   2   0  -4   95.33    4.41
  -2   0   3 3156.82   63.77
  -2   0   3 3084.47   63.38
   2   0  -3 3246.14   63.28
  -2   0   3 3166.42   62.83
   2   0  -3 3158.09   62.70
  -2   0   3 3194.13   62.43
  -2   0   2 7555.04  142.74
   2   0  -2 7570.45  143.27
  -2   0   2 7439.83  143.43
  -2   0   2 7286.47  142.53
  -2   0   2 7368.46  141.86
   2   0  -2 7498.55  142.93
  -2   0   1   11.95    2.50
  -2   0   1   10.50    1.19
  -2   0   1    6.88    1.81
   2   0  -1   10.44    2.17
  -2   0   1   11.48    1.93
   2   0  -1   10.69    2.28
  -2   0   0  598.14   13.51
  -2   0   0  626.64   12.73
  -2   0   0  602.31   13.03
  -2   0   0  577.91   13.51
  -2   0  -1  850.76   17.81
  -2   0  -1  887.87   18.40
  -2   0  -1  893.04   19.60
  -2   0  -1  834.21   19.15
  -2   0  -1  847.79   18.46
  -2   0  -2  516.44   14.19
  -2   0  -2  501.82   13.67
  -2   0  -2  504.41   12.10
  -2   0  -2  503.52   12.55
  -2   0  -3   11.93    3.97
  -2   0  -3   13.99    3.17
  -2   0  -3    8.65    4.07
  -2   0  -3   10.92    2.52
  -2   0  -4  233.20    9.05
   2   0   4  240.05    9.01
  -2   0  -4  245.20    6.00
  -2   0  -4  213.41   10.17
  -2   0  -4  253.79   10.93
   2   0   4  227.39   10.86
  -2   0  -5   14.78    3.96
  -2   0  -5   17.28    1.59
  -2   0  -5   18.75    5.09
   2   0   5   17.21    5.51
  -2   0  -5   17.87    5.04
  -2   0  -6  318.24   12.18
  -2   0  -6  323.30    7.70
  -2   0  -6  306.92   13.52
  -2   0  -6  316.34   14.05
   2   0   6  313.96   14.52
  -2   0  -7  255.10   11.47
  -2   0  -7  267.16    6.86
  -2   0  -7  272.70   13.56
  -2   0  -7  268.81   13.93
  -2   0  -8    5.37    5.04
  -2   0  -8    8.69    1.87
  -2   0  -8   13.12    7.03
  -2   0  -8    8.75    6.73
   2   0   8   10.45    7.03
  -2   0  -9  544.18   21.65
   2   0   9  565.42   23.34
  -2   0  -9  521.80   12.28
  -2   0  -9  536.59   18.95
  -2   0 -10   17.65    7.77
  -2   0 -11   10.36    7.76
  -2   0 -12    2.74    8.14
  -2   1  14   27.94    8.62
   2   1 -14   14.08    9.12
  -2   1  13   26.19    7.96
   2   1 -13   26.88    8.92
  -2   1  13   17.20    5.18
   2   1 -12   74.51   10.27
  -2   1  12   79.81    9.66
   2   1 -12   70.43    6.08
  -2   1  12   72.19    5.68
  -2   1  12   66.85    6.72
   2   1 -11   58.86    9.28
  -2   1  11   41.63    5.82
  -2   1  11   40.86    7.54
  -2   1  11   41.58    4.68
   2   1 -11   51.22    5.19
  -2   1  10   12.84    8.29
   2   1 -10    9.82    6.58
  -2   1  10    2.77    4.54
   2   1 -10   -0.42    5.82
  -2   1  10   15.11    6.48
   2   1 -10    9.18    6.68
   2   1 -10    6.32    3.58
  -2   1   9  464.50   13.65
   2   1  -9  479.80   19.24
  -2   1   9  500.78   15.38
   2   1  -9  513.19   17.64
  -2   1   9  489.75   18.36
   2   1  -9  519.65   18.53
   2   1  -9  502.64   14.42
  -2   1   8  346.13   10.45
   2   1  -8  334.58   15.07
  -2   1   8  328.72   15.71
  -2   1   8  327.91   11.70
   2   1  -8  328.78   13.22
  -2   1   8  333.46   14.09
   2   1  -8  341.81   13.86
   2   1  -8  327.01   10.76
  -2   1   7  342.08   10.26
  -2   1   7  343.44   11.60
   2   1  -7  372.22   11.46
  -2   1   7  331.51   15.02
   2   1  -7  370.12   13.07
  -2   1   7  341.20   13.45
   2   1  -7  348.45   13.23
   2   1  -7  344.92   10.76
  -2   1   6   27.45    4.09
   2   1  -6   27.74    3.78
   2   1  -6   27.35    4.52
  -2   1   6   26.88    4.57
  -2   1   6   30.07    6.05
  -2   1   6   25.13    2.88
   2   1  -6   25.14    3.24
   2   1  -5  292.04    9.73
  -2   1   5  285.35   11.47
  -2   1   5  281.92   10.19
   2   1  -5  286.10    9.04
   2   1  -4  201.18    7.49
  -2   1   4  194.54    8.17
  -2   1   4  190.00    6.26
  -2   1   4  200.30    7.29
   2   1  -4  195.38    6.90
   2   1  -3 2262.99   46.93
  -2   1   3 2301.69   46.85
  -2   1   3 2343.98   45.64
  -2   1   3 2234.48   45.73
   2   1  -3 2261.08   46.58
   2   1  -2 8109.92  156.80
  -2   1   2 8244.71  155.57
  -2   1   2 8118.57  155.49
  -2   1   2 8106.80  154.48
   2   1  -2 8081.39  156.82
   2   1  -1  689.97   16.04
  -2   1   1  696.50   15.27
  -2   1   1  697.63   14.96
  -2   1   1  686.76   13.73
  -2   1   1  709.44   14.36
   2   1  -1  700.43   16.56
  -2   1   0 6303.83  120.02
   2   1   0 6235.75  122.42
  -2   1   0 6331.01  120.04
  -2   1   0 6228.61  120.48
  -2   1  -1  300.49    8.55
  -2   1  -1  300.17    6.90
  -2   1  -1  305.02    8.27
   2   1   2  179.67    4.86
  -2   1  -2  174.03    6.46
  -2   1  -2  159.64    6.90
  -2   1  -2  180.63    4.35
  -2   1  -3 1676.80   39.13
   2   1   3 1615.07   37.91
  -2   1  -3 1707.60   37.82
  -2   1  -3 1736.58   36.62
  -2   1  -4  294.07   10.42
  -2   1  -4  282.22   11.51
   2   1   4  275.29   11.66
  -2   1  -4  278.04   12.28
  -2   1  -5   16.46    5.61
   2   1   5   18.97    5.48
  -2   1  -5   16.17    1.02
  -2   1  -5   17.64    4.23
  -2   1  -5   18.62    5.17
  -2   1  -5   14.96    1.61
  -2   1  -6  342.72   12.66
  -2   1  -6  321.01    7.09
  -2   1  -6  319.82   13.87
  -2   1  -6  342.34   15.31
   2   1   6  342.64   14.98
  -2   1  -7  624.62   19.03
  -2   1  -7  575.32   12.32
  -2   1  -7  622.90   20.96
   2   1   7  665.28   22.67
  -2   1  -7  640.93   22.69
  -2   1  -8  293.89   12.91
  -2   1  -8  263.66    6.34
  -2   1  -8  286.29   14.72
   2   1   8  296.12   15.82
  -2   1  -8  280.40   15.27
   2   1   9  251.89   14.10
   2   1   9  272.14   16.29
  -2   1  -9  277.08   15.99
  -2   1  -9  273.50   13.19
   2   1  10   99.26   10.13
  -2   1 -10  124.14   12.13
   2   1  11   46.42    8.24
  -2   1 -11   59.93   10.48
   2   1  12    9.93    7.96
  -2   1 -12    0.73    8.56
  -2   2  14   62.88   10.00
   2   2 -14   63.43   11.31
  -2   2  13   90.15    7.56
   2   2 -13   98.41   12.59
  -2   2  13   92.05   10.21
  -2   2  12   44.49    5.20
  -2   2  12   40.69    6.00
  -2   2  12   56.02    8.26
   2   2 -12   56.27   10.08
  -2   2  11   68.65    5.68
  -2   2  11   68.37    6.61
  -2   2  11   64.88    8.52
   2   2 -11   76.47    6.15
  -2   2  10   51.02    9.63
  -2   2  10   52.31    5.83
   2   2 -10   32.49    6.72
  -2   2  10   31.28    6.41
   2   2 -10   37.96    7.31
  -2   2  10   40.64    4.60
   2   2 -10   45.99    4.98
  -2   2   9    5.55    6.81
  -2   2   9    0.26    4.01
   2   2  -9    2.30    5.03
   2   2  -9    6.12    5.59
  -2   2   9    3.28    5.06
   2   2  -9   -0.93    3.36
  -2   2   9    0.21    2.97
  -2   2   8  103.08    5.71
  -2   2   8  122.18   10.18
  -2   2   8  104.38    6.64
   2   2  -8  116.28    6.62
   2   2  -8  103.69    8.12
   2   2  -8  107.03    7.70
  -2   2   8  115.34    8.15
   2   2  -8  119.37    6.33
  -2   2   7   59.70    5.07
   2   2  -7   65.93    5.22
  -2   2   7   65.88    7.80
  -2   2   7   60.33    4.31
  -2   2   7   73.52    6.15
   2   2  -7   66.87    4.77
  -2   2   6  147.52    6.84
   2   2  -6  143.51    7.25
  -2   2   6  134.52    7.34
   2   2  -6  140.54    6.52
  -2   2   6  134.67    8.76
   2   2  -5  831.08   20.64
  -2   2   5  771.71   21.79
  -2   2   5  834.85   20.49
   2   2  -5  818.54   20.01
   2   2  -4 3197.54   64.81
  -2   2   4 3125.73   64.91
  -2   2   4 3124.44   62.91
  -2   2   4 3205.69   63.69
   2   2  -4 3201.51   64.45
   2   2  -3  154.22    6.63
  -2   2   3  143.73    5.08
  -2   2   3  132.91    5.72
  -2   2   3  138.00    4.77
   2   2  -3  148.76    6.41
  -2   2   2  863.49   19.85
   2   2  -2  875.87   20.43
  -2   2   2  837.18   18.59
   2   2  -2  884.75   20.92
  -2   2   2  891.32   18.75
  -2   2   1 3792.23   72.44
  -2   2   1 3775.35   73.23
   2   2  -1 3734.70   74.27
   2   2  -1 3672.08   75.54
  -2   2   1 3747.20   72.22
  -2   2   1 3697.07   71.79
  -2   2   0  186.45    5.95
  -2   2   0  176.46    5.17
  -2   2   0  176.25    4.83
  -2   2   0  179.50    5.15
  -2   2  -1 1638.21   34.40
   2   2   1 1655.15   33.46
  -2   2  -1 1604.89   34.18
  -2   2  -1 1673.39   32.21
  -2   2  -1 1630.56   33.79
  -2   2  -2 4988.97   99.49
   2   2   2 4885.70   99.34
  -2   2  -2 4874.29   99.76
   2   2   2 4820.75   97.90
  -2   2  -2 5171.25   95.89
  -2   2  -3   87.96    5.66
  -2   2  -3  102.92    6.36
  -2   2  -3   88.24    3.59
   2   2   3   80.78    3.78
   2   2   3   87.42    6.22
  -2   2  -4 1371.33   31.63
  -2   2  -4 1356.93   32.62
   2   2   4 1330.22   27.61
  -2   2  -4 1375.76   27.44
  -2   2  -4 1322.66   34.96
   2   2   4 1368.71   33.17
  -2   2  -5  881.44   23.10
   2   2   5  852.62   24.83
  -2   2  -5  850.54   26.49
   2   2   5  898.41   23.75
  -2   2  -5  857.28   24.24
   2   2   5  863.11   18.15
  -2   2  -5  874.38   17.78
   2   2   6   40.89    2.08
   2   2   6   40.15    1.89
  -2   2  -6   51.52    5.74
  -2   2  -6   33.33    7.29
   2   2   6   41.16    6.98
  -2   2  -6   32.17    6.25
   2   2   6   46.55    5.87
  -2   2  -7   29.11    5.57
   2   2   7   30.15    7.45
  -2   2  -7    8.89    6.71
  -2   2  -7   18.23    6.17
   2   2   7   19.01    5.27
  -2   2  -8   51.48    6.95
  -2   2  -8   35.76    8.00
   2   2   8   54.96    8.96
  -2   2  -8   56.71    8.44
   2   2   8   50.27    7.21
   2   2   9   63.09   10.38
  -2   2  -9   65.93   10.22
   2   2   9   58.17    8.13
  -2   2  -9   49.67    7.43
  -2   2 -10   45.57    9.91
   2   2  10   56.31    8.02
  -2   2 -11   50.19   10.67
   2   2  11   51.95    8.69
  -2   2 -12   71.03   11.75
   2   2  12   80.09    9.98
  -2   3  14   34.36    8.09
  -2   3  13   26.53    5.88
  -2   3  13   22.09    7.41
  -2   3  12   60.26    6.60
  -2   3  12   65.72    8.86
  -2   3  11   70.85    6.80
  -2   3  11   69.33    5.91
  -2   3  11   78.06    8.33
   2   3 -11   70.69    6.41
   2   3 -10   23.28    4.87
  -2   3  10   17.74    4.21
  -2   3  10   24.57    5.18
   2   3 -10   21.52    4.61
  -2   3  10   30.03    8.86
   2   3 -10   21.65    7.08
  -2   3  10   25.68    5.95
  -2   3   9  242.63   10.22
   2   3  -9  244.39   10.35
  -2   3   9  276.44   14.93
  -2   3   9  238.49    9.51
   2   3  -9  239.65   12.41
  -2   3   9  226.75   11.80
   2   3  -9  249.04   10.15
  -2   3   8  294.76   10.46
  -2   3   8  323.45   15.15
   2   3  -8  315.33   11.77
  -2   3   8  311.45   11.28
  -2   3   8  311.42   12.80
   2   3  -8  336.58   11.55
  -2   3   7 1355.74   34.91
   2   3  -7 1331.77   31.66
  -2   3   7 1334.47   32.42
   2   3  -7 1291.71   30.93
  -2   3   6   40.84    5.99
   2   3  -6   41.20    4.83
  -2   3   6   42.37    4.54
   2   3  -6   37.08    4.07
   2   3  -6   38.09    4.53
   2   3  -5  256.73    9.70
   2   3  -5  241.82    9.80
  -2   3   5  243.75   10.35
  -2   3   5  266.45    9.11
   2   3  -5  260.77    8.71
  -2   3   4  675.76   16.78
  -2   3   4  701.42   18.25
   2   3  -4  712.30   18.88
  -2   3   4  752.82   17.16
   2   3  -4  714.23   18.94
   2   3  -3  200.17    8.15
  -2   3   3  178.33    6.65
   2   3  -3  184.94    8.20
  -2   3   3  177.29    6.16
   2   3  -2  147.68    6.83
  -2   3   2  150.25    6.17
  -2   3   2  151.77    5.14
   2   3  -2  137.64    4.95
   2   3  -2  140.88    7.34
  -2   3   2  133.80    4.98
  -2   3   1  355.35    8.76
   2   3  -1  344.50   10.62
   2   3  -1  343.60    7.83
  -2   3   1  331.81    9.55
  -2   3   1  334.59    8.50
  -2   3   1  327.76    8.28
  -2   3   0 1120.27   23.46
  -2   3   0 1114.40   24.52
   2   3   0 1130.53   22.10
   2   3   0 1140.94   22.32
  -2   3   0 1135.81   23.60
  -2   3   0 1125.40   23.60
  -2   3   0 1064.47   23.13
  -2   3  -1  158.58    6.32
   2   3   1  158.60    5.20
  -2   3  -1  152.76    5.94
  -2   3  -1  162.35    4.56
  -2   3  -1  163.09    5.74
  -2   3  -2  200.06    7.86
   2   3   2  205.40    7.40
  -2   3  -2  200.69    7.80
   2   3   2  189.23    7.04
  -2   3  -2  219.01    7.42
  -2   3  -3  370.34   12.12
   2   3   3  378.47   12.20
  -2   3  -3  388.23   12.55
   2   3   3  407.64   11.99
   2   3   3  372.14   10.49
  -2   3  -4  238.95    9.90
   2   3   4  251.15   10.60
  -2   3  -4  239.29   12.34
  -2   3  -4  232.03   10.27
   2   3   4  245.87    9.60
   2   3   4  247.99    7.67
  -2   3  -4  245.19    7.51
  -2   3  -5  162.36    8.60
  -2   3  -5  177.22   11.40
   2   3   5  182.30    9.93
  -2   3  -5  169.73    9.30
   2   3   5  160.46    8.34
  -2   3  -5  173.60    5.91
   2   3   5  178.00    6.07
  -2   3  -6  189.30    9.57
  -2   3  -6  179.86   10.19
  -2   3  -6  184.73   12.49
   2   3   6  202.06   11.38
   2   3   6  183.82    9.62
  -2   3  -6  183.32    5.85
   2   3   6  175.76    6.04
  -2   3  -7   87.63    7.82
   2   3   7  104.83    9.87
  -2   3  -7   95.59   10.80
  -2   3  -7  103.95    9.00
   2   3   7   86.34    7.53
   2   3   7   84.72    4.06
  -2   3  -7   98.14    3.67
   2   3   8   26.26    2.15
   2   3   8   23.19    2.28
  -2   3  -8   36.11    6.77
  -2   3  -8   34.94    7.43
   2   3   8   26.54    5.97
   2   3   8   26.78    8.16
  -2   3  -8   32.17    8.59
   2   3   9  134.48   10.22
   2   3   9  125.65   12.22
  -2   3  -9  130.15   13.05
   2   3  10   97.76    9.62
  -2   3 -10  107.65   12.25
   2   3  11   27.69    7.69
  -2   3 -11   23.57    9.39
   2   3  12   12.99    7.77
  -2   3 -12   13.17    9.58
  -2   4  13  154.60    9.51
  -2   4  13  150.64   11.67
  -2   4  12   73.48    7.31
  -2   4  12   68.67    8.68
  -2   4  11   39.20    5.91
  -2   4  11   35.67    6.67
   2   4 -11   18.47    5.29
   2   4 -11   38.57    5.61
   2   4 -10   49.80    6.10
  -2   4  10   49.38    6.63
   2   4 -10   50.89    6.03
  -2   4  10   55.02    5.99
   2   4 -10   56.59    8.05
   2   4 -10   59.31    6.31
   2   4  -9  136.04    8.10
  -2   4   9  127.82   11.34
   2   4  -9  146.32    8.53
  -2   4   9  142.07    8.01
  -2   4   9  107.98    6.87
  -2   4   9  130.75    8.72
   2   4  -9  141.18    8.19
   2   4  -8  162.88    8.47
  -2   4   8  145.78   10.87
   2   4  -8  149.28    8.52
  -2   4   8  137.03    7.33
  -2   4   8  150.45    8.73
   2   4  -8  160.02    8.11
  -2   4   7   32.04    6.53
   2   4  -7   26.45    4.76
  -2   4   7   24.68    3.82
  -2   4   7   26.51    4.36
   2   4  -7   23.23    4.02
   2   4  -7   32.96    5.15
   2   4  -6  688.64   19.48
   2   4  -6  664.96   19.56
  -2   4   6  679.16   20.42
  -2   4   6  678.10   18.45
   2   4  -6  696.53   18.09
  -2   4   5  158.88    6.81
  -2   4   5  145.68    8.00
   2   4  -5  169.20    8.51
   2   4  -5  146.33    7.68
   2   4  -5  170.93    8.57
   2   4  -5  175.41    6.94
   2   4  -4  113.50    7.12
  -2   4   4  108.75    6.27
   2   4  -4  121.11    6.24
   2   4  -4  104.91    7.31
  -2   4   4  111.24    5.44
   2   4  -3  598.26   14.84
   2   4  -3  618.34   17.05
  -2   4   3  596.81   14.78
   2   4  -3  569.99   17.09
  -2   4   3  578.09   14.58
  -2   4   2 1473.90   31.26
   2   4  -2 1438.18   33.70
  -2   4   2 1498.69   31.01
  -2   4   2 1488.07   31.68
   2   4  -2 1513.25   30.89
  -2   4   2 1425.39   32.19
  -2   4   1  355.49    9.84
   2   4  -1  378.12   12.21
   2   4  -1  377.47    8.77
  -2   4   1  370.63    9.70
  -2   4   1  367.65    9.60
   2   4  -1  389.43    9.02
  -2   4   1  368.61   10.75
  -2   4   0  874.57   19.10
  -2   4   0  849.06   20.17
   2   4   0  865.80   17.82
  -2   4   0  856.68   19.20
   2   4   0  864.93   17.87
  -2   4   0  855.23   18.81
  -2   4  -1  165.88    6.58
   2   4   1  172.61    5.54
  -2   4  -1  170.26    6.25
  -2   4  -1  155.62    6.94
  -2   4  -2 3774.95   76.76
  -2   4  -2 3765.69   76.39
   2   4   2 3853.53   75.40
   2   4   2 3718.77   76.24
  -2   4  -2 3803.91   75.72
   2   4   3   44.14    4.05
   2   4   3   51.05    5.06
  -2   4  -3   50.21    4.96
  -2   4  -3   46.70    5.03
  -2   4  -3   57.46    4.64
  -2   4  -4  822.16   22.09
   2   4   4  870.70   22.57
  -2   4  -4  853.95   22.58
  -2   4  -4  833.31   19.82
   2   4   4  785.62   19.81
  -2   4  -4  843.14   26.19
  -2   4  -4  839.07   21.20
  -2   4  -5  659.92   19.70
  -2   4  -5  680.60   20.40
  -2   4  -5  669.42   23.84
   2   4   5  662.00   20.57
   2   4   5  680.10   19.53
   2   4   5  668.01   16.82
  -2   4  -5  695.95   16.91
   2   4   6   54.52    4.17
  -2   4  -6   57.98    4.16
   2   4   6   56.66    7.62
  -2   4  -6   60.55    8.81
  -2   4  -6   67.32    6.65
  -2   4  -6   60.27    6.99
   2   4   6   63.55    6.11
  -2   4  -7  271.51   12.56
  -2   4  -7  249.08   12.91
  -2   4  -7  265.05   16.03
   2   4   7  259.94   13.88
   2   4   7  259.81   12.08
   2   4   7  245.41    8.33
  -2   4  -7  273.35    8.36
  -2   4  -8    9.76    2.55
   2   4   8    6.79    2.86
  -2   4  -8   13.84    5.76
  -2   4  -8    6.48    6.53
   2   4   8   11.87    5.20
  -2   4  -8    6.35    8.16
   2   4   8    1.14    6.99
   2   4   9   46.43    3.12
   2   4   9   40.08    3.38
   2   4   9   54.38    7.24
   2   4   9   54.51    9.98
  -2   4  -9   42.23   10.15
   2   4  10    4.63    5.96
  -2   4 -10   16.82    9.46
   2   4  11   36.49    7.63
  -2   4 -11   35.64   10.46
   2   4  12  158.19   12.15
  -2   4 -12  127.32   14.59
  -2   5  13   45.07    7.84
  -2   5  13   29.64    6.18
  -2   5  12  408.30   17.42
   2   5 -12  373.24   14.16
  -2   5  11  128.11    9.75
   2   5 -11  141.72    8.96
  -2   5  11  151.83    9.05
   2   5 -10   10.28    5.17
  -2   5  10    5.30    4.78
   2   5 -10   10.53    5.20
  -2   5  10    7.39    4.96
  -2   5   9    6.47    7.41
   2   5  -9   -1.37    4.87
   2   5  -9    2.87    5.91
   2   5  -9   13.13    5.28
  -2   5   9   16.47    5.07
   2   5  -9    8.02    4.23
  -2   5   8   17.84    4.30
   2   5  -8   22.36    5.55
   2   5  -8   22.11    5.94
  -2   5   8   22.81    7.21
   2   5  -8   32.13    5.75
  -2   5   8   16.69    4.50
   2   5  -8   24.40    4.73
   2   5  -7  150.55    8.93
   2   5  -7  156.27    9.06
  -2   5   7  158.05    9.87
   2   5  -7  147.74    8.80
   2   5  -7  165.27    7.71
   2   5  -6  271.54   14.06
  -2   5   6  257.28   11.36
   2   5  -6  268.90   10.95
   2   5  -6  250.46   11.15
   2   5  -6  258.04    9.56
   2   5  -5  594.54   16.93
   2   5  -5  583.45   18.28
   2   5  -5  621.61   20.62
  -2   5   5  572.55   17.10
  -2   5   5  592.29   16.09
   2   5  -5  591.21   15.72
   2   5  -4  261.30   11.99
  -2   5   4  259.99    9.50
   2   5  -4  258.95   11.01
   2   5  -4  274.60    9.56
  -2   5   4  246.86    8.99
  -2   5   3   98.62    5.33
   2   5  -3   85.27    6.74
  -2   5   3   98.47    5.25
   2   5  -3  105.64    5.32
  -2   5   3   96.13    6.44
  -2   5   2 2996.51   59.44
   2   5  -2 2961.20   62.50
  -2   5   2 2898.14   58.81
  -2   5   2 2932.66   59.90
   2   5  -2 2917.58   58.70
  -2   5   2 2900.92   60.44
   2   5  -1  209.68    9.25
  -2   5   1  211.58    7.88
   2   5  -1  201.13    6.06
  -2   5   1  189.44    6.76
   2   5  -1  184.15    5.73
  -2   5   1  193.37    6.60
  -2   5   0 2545.38   52.43
   2   5   0 2565.44   49.92
   2   5   0 2492.40   49.79
  -2   5   0 2510.95   51.17
  -2   5   0 2530.37   51.12
  -2   5  -1   35.46    4.11
   2   5   1   43.39    3.06
  -2   5  -1   42.83    3.62
  -2   5  -1   42.29    4.54
  -2   5  -2  541.81   15.51
   2   5   2  550.87   13.97
  -2   5  -2  522.75   14.98
   2   5   2  519.79   15.42
  -2   5  -2  546.19   14.39
  -2   5  -3 1406.41   33.00
  -2   5  -3 1384.02   32.74
   2   5   3 1481.91   32.29
  -2   5  -3 1421.86   32.03
   2   5   3 1339.00   31.99
  -2   5  -3 1427.36   31.83
   2   5   4   41.36    4.40
  -2   5  -4   43.68    4.43
  -2   5  -4   49.28    5.50
   2   5   4   41.93    5.28
  -2   5  -4   40.64    5.36
  -2   5  -4   41.39    4.54
  -2   5  -5   19.31    3.84
   2   5   5   13.04    3.53
  -2   5  -5   13.53    4.51
   2   5   5   20.90    5.22
  -2   5  -5   14.96    6.72
  -2   5  -5   23.83    4.97
  -2   5  -5   24.22    4.11
  -2   5  -6   81.22   10.42
   2   5   6   65.44    7.83
  -2   5  -6   58.78    6.80
  -2   5  -6   83.41    7.87
  -2   5  -6   74.31    5.33
   2   5   6   69.64    5.21
  -2   5  -6   79.42    6.46
  -2   5  -7  255.32   12.32
  -2   5  -7  268.33   13.07
   2   5   7  243.50    9.13
  -2   5  -7  236.46    8.96
  -2   5  -7  268.27   11.45
   2   5   7  252.48   13.81
  -2   5  -7  261.19   16.34
   2   5   8  408.22   15.87
   2   5   8  347.62   11.31
  -2   5  -8  375.26   11.12
  -2   5  -8  364.52   20.33
   2   5   8  382.40   18.21
   2   5   9    2.68    3.20
  -2   5  -9    2.44    2.73
   2   5   9    3.26    5.39
  -2   5  -9    5.59    9.16
   2   5  10   43.74    3.43
   2   5  10   44.46    3.80
   2   5  10   59.39    7.82
  -2   5 -10   37.12   10.66
   2   5  11  121.59   10.64
  -2   5 -11  110.00   14.13
   2   6 -13   80.23   13.41
   2   6 -12    8.11    5.79
  -2   6  12   12.31    5.45
   2   6 -12   21.04   10.77
   2   6 -11   10.44    9.35
  -2   6  11    8.73    5.17
   2   6 -11   18.21    5.83
   2   6 -10  122.95    8.73
   2   6 -10  102.59   12.42
   2   6  -9   82.95   10.88
   2   6  -9   77.15    8.08
   2   6  -9   70.44    7.44
   2   6  -9   82.14    6.83
  -2   6   8  137.60   10.89
   2   6  -8  156.44   12.85
   2   6  -8  161.85    9.84
   2   6  -8  160.73    9.93
   2   6  -8  140.84    7.86
   2   6  -7  101.74   10.74
  -2   6   7  118.34    8.96
   2   6  -7  111.07    7.99
   2   6  -7  127.43    8.88
   2   6  -7  112.50    6.75
   2   6  -6  223.42   13.22
  -2   6   6  218.47   10.56
   2   6  -6  226.68   10.22
   2   6  -6  203.38   10.82
   2   6  -6  227.53    8.96
  -2   6   5  271.67   10.74
   2   6  -5  236.07   12.81
   2   6  -5  263.98   10.36
   2   6  -5  261.88   11.88
   2   6  -5  270.59    9.39
  -2   6   4   61.74    5.18
   2   6  -4   58.76    4.94
   2   6  -4   66.50    6.58
  -2   6   3  417.99   12.17
   2   6  -3  407.00   14.83
   2   6  -3  436.33   12.38
   2   6  -2  974.83   26.74
  -2   6   2 1021.94   23.22
  -2   6   2  977.84   24.31
  -2   6   2 1050.47   25.03
   2   6  -2 1070.66   23.25
   2   6  -1 1988.95   45.90
  -2   6   1 1976.69   43.40
   2   6  -1 2070.89   41.41
  -2   6   1 2000.58   42.36
   2   6  -1 2037.94   40.96
  -2   6   1 2033.95   42.06
   2   6   0  160.10    5.55
  -2   6   0  161.03    7.44
   2   6   0  161.37    5.31
  -2   6   0  164.37    6.47
  -2   6   0  151.84    6.32
   2   6   1  203.64    6.65
  -2   6  -1  208.20    7.55
  -2   6  -1  217.87    8.59
   2   6   1  194.62    6.93
  -2   6  -2  854.60   22.13
   2   6   2  889.20   20.44
  -2   6  -2  844.90   21.76
   2   6   2  838.71   22.72
  -2   6  -2  876.72   20.99
  -2   6  -3  160.49    8.06
   2   6   3  164.61    7.45
  -2   6  -3  142.91    7.75
  -2   6  -3  149.18    7.88
   2   6   3  158.30    8.14
  -2   6  -3  155.93    7.18
  -2   6  -4  185.16    9.26
   2   6   4  191.95    9.11
  -2   6  -4  172.18    9.02
  -2   6  -4  186.66    8.59
   2   6   4  171.02    8.49
  -2   6  -4  195.30    8.49
  -2   6  -5  431.44   15.32
   2   6   5  456.71   15.80
  -2   6  -5  392.30   14.95
   2   6   5  412.20   13.83
  -2   6  -5  432.69   13.88
  -2   6  -5  429.36   14.03
  -2   6  -5  411.63   19.00
  -2   6  -6  114.05    8.30
  -2   6  -6  109.66   11.51
   2   6   6  102.92    8.87
  -2   6  -6  101.73    8.51
   2   6   6  102.33    6.75
  -2   6  -6   99.92    6.70
  -2   6  -6  116.57    7.44
  -2   6  -7  268.99   13.11
   2   6   7  315.65   15.30
  -2   6  -7  305.24   17.87
   2   6   7  273.55   10.72
  -2   6  -7  290.21   10.80
  -2   6  -7  316.96   12.60
  -2   6  -7  263.62   13.58
  -2   6  -8  129.30    7.02
   2   6   8  125.98    7.12
  -2   6  -8  131.00   13.82
   2   6   8  137.45   12.02
   2   6   9   66.05    5.49
  -2   6  -9   54.33    5.00
  -2   6  -9   55.78   11.07
   2   6  10   19.94    3.87
   2   6  10   15.18    3.36
  -2   6 -10    7.98   10.09
  -2   6 -11   73.21   13.34
   2   7 -12  384.65   15.47
   2   7 -12  346.29   21.87
   2   7 -11   13.89    6.31
   2   7 -11   41.37   11.30
   2   7 -10   47.31    7.51
   2   7 -10   76.52   11.63
   2   7  -9  198.93   11.55
   2   7  -9  192.19   15.13
   2   7  -8  103.92    8.58
   2   7  -8  108.32    9.16
   2   7  -8  102.03    7.19
   2   7  -8   98.33   11.24
   2   7  -7  842.56   23.90
   2   7  -7  779.47   28.32
   2   7  -7  815.80   24.94
   2   7  -7  821.15   21.82
   2   7  -6   60.53    8.54
  -2   7   6   52.34    6.37
   2   7  -6   59.02    6.04
   2   7  -6   59.14    7.24
   2   7  -6   57.58    5.17
  -2   7   5  188.85    9.29
   2   7  -5  203.72   12.34
   2   7  -5  199.09    9.24
   2   7  -5  203.63   11.04
   2   7  -5  206.17    8.31
  -2   7   4   76.87    5.58
   2   7  -4   74.03    5.48
   2   7  -4   67.87    4.80
  -2   7   3  113.26    6.02
   2   7  -3  134.94    8.93
   2   7  -3  137.17    6.45
   2   7  -2  744.30   22.08
   2   7  -2  717.89   17.16
  -2   7   2  718.49   18.05
  -2   7   2  735.69   19.57
   2   7  -2  747.78   18.01
   2   7  -1  183.30    9.91
   2   7  -1  188.73    6.66
  -2   7   1  171.43    7.37
  -2   7   1  169.49    6.79
   2   7  -1  186.51    6.24
  -2   7   0  224.70    9.02
   2   7   0  206.06    7.05
   2   7   0  208.95    6.69
  -2   7   0  209.18    7.64
  -2   7   0  213.44    7.82
   2   7   1  452.43   11.75
  -2   7  -1  424.96   13.74
   2   7   1  448.35   12.28
  -2   7  -1  438.62   12.63
  -2   7  -1  444.03   12.73
  -2   7  -2   82.64    6.13
   2   7   2   89.11    5.08
   2   7   2   81.96    6.79
  -2   7  -2   95.64    5.55
  -2   7  -3  787.68   21.78
   2   7   3  816.64   20.55
  -2   7  -3  778.63   21.29
   2   7   3  747.31   21.98
  -2   7  -3  781.46   21.96
  -2   7  -3  796.63   20.39
  -2   7  -4   30.64    5.29
   2   7   4   29.36    5.08
  -2   7  -4   23.45    5.14
   2   7   4   25.17    5.38
  -2   7  -4   19.72    4.78
  -2   7  -4   26.47    4.20
  -2   7  -5   48.59    6.37
   2   7   5   64.91    7.04
  -2   7  -5   48.59    5.99
   2   7   5   49.11    6.01
  -2   7  -5   58.99    5.77
  -2   7  -5   51.15    6.55
   2   7   6   19.34    6.21
  -2   7  -6   14.49    8.30
  -2   7  -6    9.17    4.72
   2   7   6   11.24    4.83
  -2   7  -6    8.57    4.67
  -2   7  -6   14.35    5.91
  -2   7  -6    8.31    5.32
  -2   7  -7   67.53    8.04
  -2   7  -7   60.82    6.19
   2   7   7   58.16    5.99
   2   7   7   61.63    8.73
  -2   7  -7   63.30   10.17
   2   7   8  166.46    8.77
  -2   7  -8  159.07    8.52
  -2   7  -8  148.85   14.74
   2   7   8  143.48   12.14
   2   7   9   -4.32    4.47
  -2   7  -9   -0.24    4.20
  -2   7  -9    7.03    9.26
   2   7  10    3.23    4.09
  -2   7 -10    4.63    9.67
  -2   7 -11   32.59   11.93
   2   8 -12   90.17    9.00
   2   8 -12   85.20   13.81
   2   8 -11   70.78    8.41
   2   8 -11   62.11   12.07
   2   8 -10   62.55    8.06
   2   8 -10   49.08   10.78
   2   8  -9  163.97   11.10
   2   8  -9  151.03   14.43
   2   8  -8  641.57   21.36
   2   8  -8  674.39   27.13
   2   8  -8  674.60   22.64
   2   8  -8  647.31   19.22
   2   8  -7   50.77    9.51
   2   8  -7   64.01    7.20
   2   8  -7   54.94    8.03
   2   8  -7   53.69    5.64
   2   8  -6  257.88   14.97
   2   8  -6  233.51   10.82
   2   8  -6  244.89    9.77
   2   8  -5  121.64    7.49
   2   8  -5  114.71    9.41
   2   8  -5  118.77    6.80
   2   8  -5  130.37   10.62
  -2   8   4  404.71   13.41
   2   8  -4  404.35   16.51
   2   8  -4  425.94   13.03
   2   8  -4  445.07   13.76
  -2   8   3   45.12    4.38
   2   8  -3   50.58    6.92
   2   8  -3   47.44    4.60
   2   8  -2  516.23   18.69
   2   8  -2  558.27   14.06
  -2   8   2  556.32   14.93
  -2   8   2  528.87   16.49
   2   8  -2  535.14   14.66
   2   8  -1  313.93   13.65
   2   8  -1  294.47    9.42
  -2   8   1  300.65   10.72
  -2   8   1  303.49    9.87
   2   8  -1  296.86    8.95
   2   8   0  210.37    7.54
  -2   8   0  203.52    7.83
   2   8   0  201.03    6.92
  -2   8   0  202.60    8.08
   2   8   1  350.20   10.22
   2   8   1  349.88   10.85
  -2   8  -1  339.35   10.97
  -2   8  -1  350.63   11.24
   2   8   2  408.57   15.42
  -2   8  -2  409.53   12.80
   2   8   2  424.11   12.37
  -2   8  -3  387.36   13.93
   2   8   3  388.54   12.70
   2   8   3  371.22   14.51
  -2   8  -3  380.90   14.53
  -2   8  -3  375.11   12.50
  -2   8  -4  516.78   17.03
   2   8   4  528.82   16.45
  -2   8  -4  478.33   16.41
   2   8   4  496.04   17.12
  -2   8  -4  476.96   16.80
  -2   8  -4  484.02   15.20
  -2   8  -5  363.56   14.59
   2   8   5  360.38   14.46
   2   8   5  361.00   14.24
  -2   8  -5  382.28   14.45
  -2   8  -5  371.58   13.19
  -2   8  -5  348.90   14.12
  -2   8  -6   33.43    6.42
  -2   8  -6   40.66    9.15
   2   8   6   49.42    7.66
  -2   8  -6   49.96    6.35
   2   8   6   39.86    6.30
   2   8   7   27.55    7.90
  -2   8  -7   30.79    9.20
  -2   8  -7   30.69    5.80
   2   8   7   33.38    6.12
  -2   8  -8   11.09    9.19
  -2   8  -8    4.42    4.71
   2   8   8    7.52    5.11
  -2   8  -9   10.07   10.17
   2   8   9   22.08    5.33
  -2   8 -10   47.22   12.56
   2   8  10   57.65    6.49
   2   9 -11  222.70   18.51
   2   9 -11  202.01   12.83
   2   9 -10   54.26   11.96
   2   9 -10   39.80    7.96
   2   9  -9   52.56   11.09
   2   9  -9   65.00    8.73
   2   9  -8   47.99    9.91
   2   9  -8   42.63    8.17
   2   9  -7  139.59   12.98
   2   9  -7  154.08   11.32
   2   9  -7  157.06    9.77
   2   9  -6   38.29    8.64
   2   9  -6   59.30    6.45
   2   9  -6   51.25    7.87
   2   9  -6   56.84    5.58
   2   9  -5   27.38    7.09
   2   9  -5   24.47    4.56
   2   9  -5   21.74    4.90
   2   9  -4    6.59    6.26
   2   9  -4   15.84    4.00
  -2   9   4   14.26    5.46
   2   9  -4   10.79    4.16
   2   9  -3   73.89    4.80
   2   9  -3   79.75    8.60
  -2   9   3   87.48    7.32
   2   9  -3   74.89    5.65
   2   9  -2  825.02   26.29
  -2   9   2  860.08   21.42
   2   9  -2  862.67   20.42
  -2   9   2  838.70   23.48
  -2   9   2  874.12   23.52
   2   9  -2  848.64   21.23
   2   9  -1  242.86   13.04
   2   9  -1  239.61    8.86
  -2   9   1  231.14    9.85
   2   9  -1  263.19    8.46
  -2   9   1  263.54    9.28
   2   9   0  209.47    8.10
  -2   9   0  203.74    8.20
   2   9   0  209.32    7.47
  -2   9   0  197.87    8.91
   2   9   1  202.60    7.66
   2   9   1  189.49    8.28
  -2   9  -1  209.83    8.52
  -2   9  -1  215.78    8.74
  -2   9  -2  119.76    8.89
   2   9   2  103.79    8.65
  -2   9  -2  118.57    6.55
   2   9   2  110.71    6.29
  -2   9  -2  102.93    6.37
   2   9   3 3752.28   76.44
  -2   9  -3 3740.26   76.49
  -2   9  -3 3608.34   79.90
   2   9   3 3621.20   79.99
   2   9   4  245.11   11.00
   2   9   4  224.05   11.82
  -2   9  -4  208.00   11.40
  -2   9  -4  246.59   10.30
  -2   9  -5   48.56    6.69
  -2   9  -5   48.41    6.80
   2   9   5   54.44    6.97
   2   9   5   52.34    7.11
  -2   9  -6   10.53    5.88
   2   9   6   10.15    5.73
  -2   9  -6    8.43    7.78
   2   9   6    1.78    6.25
  -2   9  -7   80.66    7.87
   2   9   7   87.59    8.10
   2   9   7   81.72    9.51
  -2   9  -7   88.56   12.13
   2   9   8  139.12    9.47
  -2   9  -8  133.89    9.30
  -2   9  -8  134.30   14.38
   2   9   9   17.29    5.76
  -2   9  -9   18.93   10.30
   2   9  10   22.04    5.91
  -2   9 -10   20.90   11.59
   2  10 -11  111.67   10.63
   2  10 -11  128.96   15.69
   2  10 -10    5.36    7.19
   2  10 -10   34.18   11.63
   2  10  -9  111.16   10.72
   2  10  -9  115.96   13.77
   2  10  -8  270.97   15.18
   2  10  -8  253.95   17.85
   2  10  -7   10.83    7.20
   2  10  -7    5.28    8.02
   2  10  -6   44.81    8.21
   2  10  -6   44.41    9.17
   2  10  -6   30.27    6.00
   2  10  -5   94.98    9.57
   2  10  -5  102.33    6.93
   2  10  -5  101.57    7.27
   2  10  -4   35.13    7.64
   2  10  -4   31.92    4.91
   2  10  -4   36.34    5.20
  -2  10   4   36.29    6.75
   2  10  -3  229.88   13.43
   2  10  -3  238.77    8.81
   2  10  -3  244.97   10.19
   2  10  -3  244.64    9.75
  -2  10   3  236.84   11.81
   2  10  -2   77.36    9.01
   2  10  -2   67.11    4.66
  -2  10   2   74.71    7.28
  -2  10   2   71.04    6.97
   2  10  -2   61.18    5.38
   2  10  -1   17.12    6.41
  -2  10   1   25.42    5.42
   2  10  -1   26.94    4.10
  -2  10   1   23.45    5.25
   2  10  -1   24.43    3.40
  -2  10   0  123.44    8.01
   2  10   0  107.62    6.41
  -2  10   0  116.09    7.47
   2  10   0  110.97    5.70
  -2  10   0  121.67    6.58
  -2  10  -1   27.42    5.36
   2  10   1   23.22    4.48
  -2  10  -1   27.86    4.25
   2  10   1   20.54    3.71
  -2  10  -1   22.88    4.67
  -2  10  -2 1440.02   39.08
   2  10   2 1525.52   39.84
  -2  10  -2 1509.32   34.71
  -2  10  -2 1523.17   35.16
   2  10   2 1522.20   34.34
  -2  10  -3   19.99    6.46
   2  10   3   12.24    6.14
   2  10   3   14.98    4.62
  -2  10  -3   21.30    4.80
   2  10   4  368.02   13.75
   2  10   4  340.24   15.43
  -2  10  -4  317.42   14.93
   2  10   5  107.24    8.69
  -2  10  -5  112.73    9.46
   2  10   5  102.68    9.19
   2  10   6   72.45    8.70
  -2  10  -6   73.59   11.34
  -2  10  -6   88.85    8.72
   2  10   6   88.96    9.09
  -2  10  -7   78.98    8.33
   2  10   7   60.84    8.20
   2  10   8   56.89    7.91
  -2  10  -8   45.43    7.40
  -2  10  -9   48.94   12.16
   2  10   9   50.44    7.60
   2  11 -10    2.88   10.02
   2  11 -10   10.89    7.49
   2  11  -9   11.86   10.81
   2  11  -9   26.28    8.41
   2  11  -8   24.64   10.53
   2  11  -8   14.09    7.68
   2  11  -7  312.51   19.14
   2  11  -7  324.78   17.04
   2  11  -6   41.46    9.84
   2  11  -6   38.32    8.90
   2  11  -5  100.79   10.54
   2  11  -5   89.68    7.39
   2  11  -4    6.61    3.63
   2  11  -4    2.26    7.06
   2  11  -4    5.99    4.33
  -2  11   4    3.81    6.32
   2  11  -3   41.32    4.41
   2  11  -3   42.40    8.25
   2  11  -3   30.76    5.03
  -2  11   3   40.16    7.05
   2  11  -2  230.71   13.90
   2  11  -2  224.85    8.62
  -2  11   2  206.13   11.91
  -2  11   2  238.41   11.55
   2  11  -2  220.08    9.39
   2  11  -1  313.61   16.24
   2  11  -1  325.16   11.53
  -2  11   1  340.52   13.67
  -2  11   1  337.49   13.65
   2  11  -1  337.12   10.75
   2  11   0   56.92    5.57
  -2  11   0   54.40    6.62
   2  11   0   65.36    4.85
  -2  11   0   63.53    6.51
   2  11   1  193.28    8.24
  -2  11  -1  173.89   11.77
  -2  11  -1  193.96    9.54
   2  11   1  205.28    9.44
  -2  11  -1  190.78   10.13
   2  11   2   49.79    5.28
  -2  11  -2   58.31    8.60
   2  11   2   50.54    8.46
   2  11   3   76.79    6.57
   2  11   3   56.53    8.50
  -2  11  -3   75.75    9.01
  -2  11  -4   71.60    8.85
   2  11   4   68.92    9.02
   2  11   4   54.54    6.84
   2  11   5   26.91    7.30
  -2  11  -5    6.91    6.53
   2  11   5   18.99    6.46
  -2  11  -6   88.90    9.53
  -2  11  -6   71.65   11.99
  -2  11  -7   49.21    7.90
   2  11   7   48.03    8.51
  -2  11  -7   48.75   11.11
   2  11   8  106.28    9.97
  -2  11  -8   75.33   12.66
   2  12  -9  126.65   12.08
   2  12  -9  130.90   15.44
   2  12  -8   13.24    8.48
   2  12  -8    9.79   10.24
   2  12  -7   76.89   10.45
   2  12  -7   78.16   12.21
   2  12  -6   30.74    8.57
   2  12  -6   22.83    9.74
   2  12  -5   49.38    9.55
   2  12  -4   18.50    7.87
   2  12  -4   13.00    4.95
   2  12  -3  404.21   13.98
   2  12  -3  386.98   18.95
   2  12  -3  396.10   12.69
   2  12  -2  133.95    7.86
   2  12  -2  138.08    6.89
   2  12  -1  357.19   12.74
   2  12  -1  389.42   18.51
   2  12  -1  359.21   11.77
   2  12   0   40.18    5.49
  -2  12   0   45.85    8.35
   2  12   0   54.81    5.11
   2  12   1   36.94    5.60
   2  12   1   27.97    4.57
  -2  12  -1   34.45    7.84
   2  12   1   39.78    8.50
   2  12   2  100.34   10.74
   2  12   2   98.44    6.78
   2  12   3   43.37    6.08
  -2  12  -3   51.41    8.82
   2  12   3   63.67    9.16
   2  12   4   68.36    9.64
  -2  12  -4   62.77    9.05
   2  12   5   32.47    7.85
  -2  12  -5   32.14    8.25
   2  12   6   97.87   10.44
  -2  12  -6   96.59   10.42
   2  12   7  253.65   15.31
  -2  12  -7  284.53   14.99
  -2  12  -7  225.75   18.61
   2  13  -8  105.62   12.15
   2  13  -8   69.66   13.11
   2  13  -7   99.90   11.94
   2  13  -6   74.86   11.05
   2  13  -6   45.15   11.24
   2  13  -5    7.42    7.96
   2  13  -4   26.78    9.04
   2  13  -3    0.66    7.38
   2  13  -3    3.63    4.71
   2  13  -2  248.52   16.09
   2  13  -2  265.42   11.23
   2  13  -1   11.05    7.98
  -2  13   1   10.51    7.76
   2  13  -1    8.16    4.75
  -2  13   0   36.80    8.53
   2  13   0   43.79    5.98
  -2  13  -1   43.28    9.14
   2  13   1   54.50    6.42
   2  13   2   52.46    9.54
  -2  13  -2   40.53    8.83
  -2  13  -3  470.00   20.79
   2  13   3  469.09   21.19
  -2  13  -4  106.86   11.00
   2  13   4   82.01   10.69
  -2  13  -5   52.45    9.39
   2  13   5   30.86    9.12
  -2  13  -6   69.23   10.11
   2  13   6   51.36    9.67
   2  14  -6   22.36    9.70
   2  14  -6   67.93   12.75
   2  14  -5   13.02    8.88
   2  14  -4   11.53    9.10
   2  14  -3  140.16   13.51
   2  14  -2   32.60    9.51
  -2  14   2   48.74    9.82
   2  14  -1   19.73    9.64
  -2  14   1   26.90    9.15
   2  14  -1   15.06    5.78
  -2  14   0   40.05    9.60
   2  14   0   48.81    6.55
  -2  14  -1   99.59   11.82
   2  14   1  101.54   12.01
   2  14   1  109.61    8.58
  -2  14  -2  214.70   14.99
   2  14   2  232.01   15.77
  -2  14  -3   58.89   10.26
   2  14   3   50.54   10.50
   2  14   4  112.28   12.50
  -2  14  -4  129.04   12.60
   2  15  -3   36.78   10.43
  -2  15   3   22.06    9.71
   2  15  -2   28.93   10.25
  -2  15   2   20.50    9.99
   2  15  -1   31.81    9.98
  -2  15   1   34.91   10.38
  -2  15   0   36.87   10.19
  -2  15  -1   24.97    9.41
   2  15   1    2.24    8.96
   2  15   2  160.58   15.08
  -2  15  -2  154.56   13.79
  -3 -15   2   56.00    7.78
   3 -15  -2   50.20    7.56
  -3 -15   2   37.17   11.56
   3 -15  -2   55.57    9.28
   3 -15  -2   46.79    8.36
  -3 -15   1   35.55    7.16
   3 -15  -1   47.86    7.93
  -3 -15   1   34.56   11.39
  -3 -15   1   36.41    9.08
   3 -15  -1   25.40    8.07
   3 -15  -1   27.16    7.94
   3 -15   0   31.79    7.14
  -3 -15   0   24.65    6.41
   3 -15   0   20.72    8.04
   3 -15   0   17.72    8.04
  -3 -15   0   21.68   11.39
   3 -14  -6   19.29    5.72
  -3 -14   6   22.94    7.37
   3 -14  -6    9.70    6.56
  -3 -14   6   35.11    9.62
  -3 -14   6   21.10    8.07
  -3 -14   5   16.51    6.71
   3 -14  -5   18.19    5.59
  -3 -14   5   11.26    6.57
   3 -14  -5   23.02    7.17
  -3 -14   5   16.45    8.38
  -3 -14   5   10.32    7.95
   3 -14  -4   29.44    6.47
  -3 -14   4   21.68    6.50
   3 -14  -4   30.05    7.35
  -3 -14   4   25.78    6.55
   3 -14  -4   22.18    7.05
  -3 -14   4   40.35    9.29
  -3 -14   4   32.94    9.50
  -3 -14   3   10.60    7.41
  -3 -14   3    6.52    5.76
   3 -14  -3   12.66    7.24
   3 -14  -3   19.39    7.15
   3 -14  -3   10.45    5.38
  -3 -14   3   15.85    6.00
  -3 -14   3    0.81    9.12
  -3 -14   2   12.90    5.72
   3 -14  -2    8.63    5.49
  -3 -14   2   21.70    9.32
  -3 -14   2   23.16    6.10
   3 -14  -2   12.46    6.50
   3 -14  -2   20.38    7.10
  -3 -14   2   17.30    7.73
  -3 -14   1   33.49    6.36
   3 -14  -1   30.50    6.69
  -3 -14   1   30.16   10.00
  -3 -14   1   39.03    6.34
  -3 -14   1   27.84    8.14
   3 -14  -1   36.39    7.90
   3 -14  -1   32.52    7.82
  -3 -14   0  122.54    9.52
   3 -14   0  152.52   10.64
  -3 -14   0  145.70   11.60
   3 -14   0  129.83   11.50
   3 -14   0  142.93   11.41
   3 -14   1  124.44   11.57
  -3 -14  -1  116.13    8.95
   3 -14   1  133.47   10.42
   3 -14   1  125.24   11.42
   3 -14   2   21.51    8.16
   3 -14   2   17.88    6.85
  -3 -14  -2   28.57    6.33
   3 -14   2   29.42    8.48
   3 -14   3   64.67   10.32
   3 -14   3   54.21   10.29
  -3 -14  -3   59.79    7.24
   3 -13  -7   16.36    5.46
  -3 -13   7   27.50    7.18
   3 -13  -7   22.72    6.73
  -3 -13   7   32.84    9.74
   3 -13  -7   21.97    5.35
  -3 -13   7   20.83    6.76
   3 -13  -6   12.30    5.10
  -3 -13   6   11.92    6.52
   3 -13  -6    6.18    6.10
  -3 -13   6    5.46    8.11
  -3 -13   6    9.39    7.37
   3 -13  -5   86.39    7.69
  -3 -13   5   95.32    9.26
  -3 -13   5   86.47    8.73
   3 -13  -5   82.19    8.89
  -3 -13   5   78.63   10.59
  -3 -13   5   95.40   10.65
  -3 -13   4    6.37    5.78
   3 -13  -4   13.05    5.25
  -3 -13   4   12.76    6.01
   3 -13  -4   14.89    6.17
  -3 -13   4   10.24    7.56
  -3 -13   4    4.29    8.22
   3 -13  -3  116.92    9.52
  -3 -13   3  133.56    9.22
  -3 -13   3  106.90   10.95
   3 -13  -3  118.96   10.07
   3 -13  -3  106.99    8.48
  -3 -13   3  115.18    9.06
  -3 -13   3  109.52   12.29
   3 -13  -2   40.85    7.24
  -3 -13   2   28.94    5.81
  -3 -13   2   36.79    7.73
   3 -13  -2   28.77    6.90
   3 -13  -2   24.73    5.60
  -3 -13   2   41.07    6.54
  -3 -13   2   33.02    9.83
  -3 -13   1   75.64    7.32
   3 -13  -1   51.82    6.91
  -3 -13   1   49.89   10.75
   3 -13  -1   54.91    8.24
   3 -13  -1   56.75    7.93
  -3 -13   1   63.35    8.81
  -3 -13   1   49.19    6.35
  -3 -13   0   72.33    6.62
  -3 -13   0   49.38    8.24
   3 -13   0   53.83    8.38
   3 -13   0   53.23    7.29
  -3 -13   0   70.45    7.25
   3 -13   0   66.02    8.73
   3 -13   1   36.07    8.08
  -3 -13  -1   33.01    5.26
   3 -13   1   28.38    7.68
   3 -13   1   31.53    6.34
  -3 -13  -1   28.16    5.83
   3 -13   2   87.87   10.01
  -3 -13  -2   74.60    6.46
   3 -13   2   76.65    5.87
   3 -13   2   88.80   10.00
   3 -13   2   98.53    9.19
  -3 -13  -2   79.79    7.62
   3 -13   3   24.17    8.04
   3 -13   3   17.34    3.91
   3 -13   3   15.87    8.03
  -3 -13  -3   29.50    5.94
   3 -13   4   42.67    9.00
   3 -13   4   45.30    4.34
   3 -13   4   47.34    9.68
  -3 -13  -4   40.85    6.44
  -3 -13  -5    5.56    5.64
   3 -13   5   12.68    8.49
   3 -13   5    8.45    8.79
   3 -13   5    7.06    4.97
   3 -12  -9   25.94    6.18
   3 -12  -9   34.16    7.47
  -3 -12   9   24.96    6.04
  -3 -12   9   27.87    7.61
  -3 -12   9   42.12   10.76
   3 -12  -9   19.62    5.53
   3 -12  -8   47.50    6.51
   3 -12  -8   46.16    7.63
  -3 -12   8   51.64    7.29
  -3 -12   8   44.57    8.00
  -3 -12   8   42.73    9.98
   3 -12  -8   50.91    6.37
   3 -12  -7  110.36    8.31
   3 -12  -7   93.87    9.18
  -3 -12   7  115.18    9.94
  -3 -12   7  121.46   10.17
  -3 -12   7  106.99   11.86
   3 -12  -7  115.70    8.12
   3 -12  -6   22.04    5.22
  -3 -12   6   24.93    6.54
   3 -12  -6   18.25    5.90
  -3 -12   6   21.65    8.38
   3 -12  -6   17.67    4.92
  -3 -12   6   25.37    7.34
   3 -12  -5   21.28    4.96
  -3 -12   5   30.27    6.58
  -3 -12   5   26.91    6.27
   3 -12  -5   31.56    6.54
  -3 -12   5   30.84    7.95
  -3 -12   5   17.63    7.42
   3 -12  -4   47.95    7.06
  -3 -12   4   52.03    6.91
   3 -12  -4   52.29    5.98
  -3 -12   4   63.45    9.83
  -3 -12   4   53.17    6.90
  -3 -12   4   61.04    8.50
   3 -12  -3  242.80   12.92
   3 -12  -3  236.65   11.39
  -3 -12   3  253.51   12.31
  -3 -12   3  240.31   16.23
  -3 -12   3  242.27   13.77
  -3 -12   3  241.46   11.62
   3 -12  -3  261.70   12.80
   3 -12  -2   86.05    8.79
   3 -12  -2   79.62    8.30
  -3 -12   2   84.44    9.16
  -3 -12   2   87.57    7.29
  -3 -12   2   67.74   10.98
   3 -12  -2   83.46    7.35
  -3 -12   2   87.18    7.52
  -3 -12   1   19.18    5.10
   3 -12  -1    5.19    4.33
   3 -12  -1    8.98    6.09
   3 -12  -1    9.37    5.81
  -3 -12   1   13.57    6.39
  -3 -12   1   15.80    4.53
   3 -12   0   34.30    4.63
  -3 -12   0   34.18    5.46
   3 -12   0   27.91    5.46
  -3 -12   0   19.50    4.71
   3 -12   0   32.44    7.01
   3 -12   0   39.90    7.20
   3 -12   1   10.97    3.66
   3 -12   1    2.41    6.01
   3 -12   1   14.69    5.54
  -3 -12  -1    6.59    4.23
   3 -12   1    8.25    6.22
  -3 -12  -1    8.46    4.30
   3 -12   2   16.37    3.73
  -3 -12  -2   13.21    4.27
   3 -12   2   10.27    6.48
   3 -12   2   16.17    7.08
   3 -12   2   17.59    5.72
  -3 -12  -2   15.24    4.87
  -3 -12  -3   33.99    4.82
   3 -12   3   36.03    4.02
   3 -12   3   32.94    7.68
   3 -12   3   28.93    8.13
  -3 -12  -3   33.49    5.80
  -3 -12  -4   21.37    4.52
   3 -12   4   21.62    7.62
   3 -12   4   22.88    3.32
   3 -12   4   20.93    8.26
  -3 -12  -4   16.69    5.60
  -3 -12  -5   18.78    5.70
   3 -12   5   11.42    7.63
   3 -12   5   12.61    2.80
   3 -12   5   28.70    8.93
  -3 -12  -5   16.21    4.20
   3 -12   5    7.37    4.94
  -3 -12  -6  161.20   10.81
   3 -12   6  173.79   13.68
   3 -12   6  143.53   13.93
  -3 -12  -6  147.77    7.99
   3 -12   6  154.15    7.03
   3 -11 -10   -1.25    5.42
   3 -11 -10    2.46    6.26
  -3 -11  10    1.98    4.21
  -3 -11  10   -0.81    8.88
   3 -11 -10   -1.10    5.01
   3 -11  -9   34.39    6.34
   3 -11  -9   21.99    6.80
  -3 -11   9   22.81    5.49
  -3 -11   9   24.76    7.20
  -3 -11   9   29.51    9.57
   3 -11  -9   23.16    5.31
   3 -11  -8  259.04   13.35
  -3 -11   8  262.29   13.95
  -3 -11   8  288.07   17.17
   3 -11  -8  249.13   11.80
  -3 -11   8  267.34   12.93
   3 -11  -8  253.21   11.62
   3 -11  -7   62.11    6.54
   3 -11  -7   59.08    7.43
  -3 -11   7   65.29    7.95
  -3 -11   7   79.65    8.75
  -3 -11   7   61.26   10.07
   3 -11  -7   59.34    6.11
   3 -11  -6   15.60    4.55
   3 -11  -6   10.52    4.89
  -3 -11   6   17.95    6.05
   3 -11  -6   13.72    5.70
  -3 -11   6   -0.59    6.52
   3 -11  -6   11.54    4.45
  -3 -11   6   16.80    6.37
   3 -11  -5   50.19    5.91
   3 -11  -5   53.95    5.88
  -3 -11   5   58.13    7.09
  -3 -11   5   53.20    7.17
   3 -11  -5   67.93    7.53
  -3 -11   5   44.39    8.45
  -3 -11   5   54.90    8.59
   3 -11  -5   47.70    5.59
   3 -11  -4   61.78    7.18
  -3 -11   4   62.48    6.73
   3 -11  -4   48.68    5.77
  -3 -11   4   55.89    9.09
  -3 -11   4   70.30    8.76
  -3 -11   4   67.70    6.96
   3 -11  -3   43.62    6.45
  -3 -11   3   46.15    6.08
  -3 -11   3   33.42    7.12
   3 -11  -3   39.88    5.63
  -3 -11   3   51.94    6.30
  -3 -11   3   45.00    9.14
   3 -11  -2   16.29    5.82
   3 -11  -2   10.69    3.88
  -3 -11   2   21.25    4.79
  -3 -11   2   24.61    6.66
   3 -11  -2   21.20    5.57
   3 -11  -2   17.19    4.39
  -3 -11   2   18.93    4.82
  -3 -11   2   10.84    8.41
  -3 -11   1   14.01    5.90
   3 -11  -1   15.99    5.64
  -3 -11   1   15.00    4.43
   3 -11  -1   19.30    4.06
   3 -11  -1   21.23    6.29
   3 -11  -1   21.03    4.95
  -3 -11   1   11.18    4.46
   3 -11   0   10.15    5.54
   3 -11   0    9.04    6.01
  -3 -11   0   11.94    4.21
   3 -11   0   10.81    3.67
   3 -11   0   17.47    5.11
  -3 -11   0   15.33    4.33
  -3 -11  -1   93.28    6.24
   3 -11   1   97.27    5.80
   3 -11   1   87.56    8.38
   3 -11   1   93.72    7.67
  -3 -11  -1   89.58    7.05
   3 -11   1   93.52    9.03
   3 -11   2   59.94    4.74
  -3 -11  -2   56.41    5.25
   3 -11   2   57.36    8.59
   3 -11   2   68.96    8.41
  -3 -11  -2   56.32    6.26
   3 -11   2   53.45    6.80
  -3 -11  -3   12.75    3.86
   3 -11   3   15.83    3.13
   3 -11   3   26.60    7.37
   3 -11   3    9.97    6.51
  -3 -11  -3    9.34    4.72
  -3 -11  -4  262.43    9.94
   3 -11   4  251.29    8.31
   3 -11   4  266.15   15.10
   3 -11   4  245.32   14.87
  -3 -11  -4  279.81   12.40
  -3 -11  -4  230.00    9.47
  -3 -11  -5   87.52    8.31
  -3 -11  -5   91.03    6.32
   3 -11   5   88.29    4.32
   3 -11   5   79.23    9.99
   3 -11   5  100.85   11.15
  -3 -11  -5   73.39    5.71
   3 -11   5   94.61    7.05
  -3 -11  -6   96.56    8.89
  -3 -11  -6   92.44    6.58
   3 -11   6   90.88   10.85
   3 -11   6   92.40    3.78
   3 -11   6   79.22   11.01
  -3 -11  -6   96.66    6.48
   3 -11   6   90.87    4.89
  -3 -11  -7   73.11    8.91
   3 -11   7   95.65   11.10
   3 -11   7   68.92   11.60
  -3 -11  -7   73.30    5.99
   3 -10 -11   43.64    7.72
  -3 -10  11   34.05    5.02
   3 -10 -11   49.59    8.36
  -3 -10  11   58.52   11.64
   3 -10 -11   55.10    6.70
   3 -10 -10   76.55    8.40
  -3 -10  10   78.13    6.50
  -3 -10  10   78.91   11.96
   3 -10 -10   83.59    7.28
   3 -10 -10   83.30    9.13
   3 -10  -9  108.74    8.77
   3 -10  -9   94.16    9.19
  -3 -10   9  118.51   12.60
   3 -10  -9  109.96    7.91
  -3 -10   9  104.73    7.85
   3 -10  -8   39.74    5.91
   3 -10  -8   43.13    7.09
  -3 -10   8   56.67    6.71
  -3 -10   8   56.12    7.80
   3 -10  -8   50.09    5.88
   3 -10  -7  158.97    9.05
  -3 -10   7  182.84   12.94
  -3 -10   7  171.88   10.82
   3 -10  -7  163.21   10.19
   3 -10  -7  170.51   10.28
   3 -10  -7  167.80    8.81
  -3 -10   7  173.52   10.61
   3 -10  -6   83.51    7.16
   3 -10  -6   83.21    6.69
  -3 -10   6   82.22    8.10
   3 -10  -6   93.60    8.27
  -3 -10   6   87.79    9.90
  -3 -10   6   80.45    8.44
   3 -10  -6   87.44    6.57
  -3 -10   5   38.54    6.07
   3 -10  -5   29.32    4.97
   3 -10  -5   36.23    5.07
   3 -10  -5   36.11    6.31
  -3 -10   5   34.46    6.00
  -3 -10   5   34.28    7.57
   3 -10  -5   25.57    4.69
  -3 -10   5   32.09    7.14
   3 -10  -4  315.73   13.39
   3 -10  -4  307.17   11.56
  -3 -10   4  323.66   14.81
  -3 -10   4  295.14   12.52
   3 -10  -4  299.61   11.69
  -3 -10   4  305.12   12.95
   3 -10  -4  303.55   11.83
  -3 -10   4  303.68   15.95
   3 -10  -3   49.02    6.46
   3 -10  -3   59.52    5.18
  -3 -10   3   54.50    5.83
  -3 -10   3   57.50    7.65
  -3 -10   3   44.48    5.67
   3 -10  -3   41.86    5.07
  -3 -10   3   44.60    8.41
  -3 -10   2  175.51    8.59
   3 -10  -2  169.25    9.43
  -3 -10   2  176.53   10.85
   3 -10  -2  187.83    8.19
   3 -10  -2  164.79   10.12
   3 -10  -2  181.42    8.83
  -3 -10   2  179.43    9.14
   3 -10  -1   67.24    6.81
   3 -10  -1   73.59    5.44
   3 -10  -1   67.30    7.34
  -3 -10   1   66.24    5.63
  -3 -10   1   72.48    5.99
   3 -10  -1   60.30    5.89
   3 -10   0    4.73    4.83
   3 -10   0    3.71    5.31
  -3 -10   0    0.44    3.36
   3 -10   0    9.06    3.39
  -3 -10   0    3.38    3.82
   3 -10   0   10.23    4.37
   3 -10   1  562.04   19.37
   3 -10   1  586.67   15.35
  -3 -10  -1  560.50   15.59
   3 -10   1  523.37   19.50
   3 -10   1  550.51   18.26
  -3 -10  -1  558.43   17.26
   3 -10   2  157.94   10.80
   3 -10   2  169.22    6.90
  -3 -10  -2  167.85    7.41
   3 -10   2  162.79   11.06
   3 -10   2  160.72    9.59
  -3 -10  -2  188.48    9.18
  -3 -10  -3   83.39    6.99
  -3 -10  -3   75.22    5.32
   3 -10   3   76.44    4.51
   3 -10   3   83.57    9.12
   3 -10   3   88.57    9.09
  -3 -10  -3   80.24    5.36
  -3 -10  -4   61.79    6.57
  -3 -10  -4   62.21    4.97
   3 -10   4   55.16    3.69
   3 -10   4   66.17    8.60
   3 -10   4   64.40    8.94
  -3 -10  -4   59.25    4.88
  -3 -10  -5  194.62   11.20
  -3 -10  -5  184.11    8.17
   3 -10   5  194.53    6.11
   3 -10   5  191.11   12.77
   3 -10   5  187.54   13.27
   3 -10   5  178.56    8.33
  -3 -10  -5  188.35    8.08
  -3 -10  -6   25.36    6.58
  -3 -10  -6   36.46    4.75
   3 -10   6   29.64    2.04
   3 -10   6   28.88    2.69
   3 -10   6   35.53    8.23
   3 -10   6   19.51    8.29
  -3 -10  -6   26.64    4.27
  -3 -10  -7    7.85    6.78
   3 -10   7   17.87    7.78
  -3 -10  -7   14.47    4.47
   3 -10   7   12.05    8.28
  -3 -10  -7   13.78    4.04
  -3 -10  -8   81.91   10.16
   3 -10   8   77.94   10.52
   3 -10   8   83.35   11.91
  -3 -10  -8   87.23    6.47
   3  -9 -11   29.46    7.27
  -3  -9  11   24.90    4.21
   3  -9 -11   34.98    7.96
  -3  -9  11   22.41   10.06
   3  -9 -11   29.49    5.73
   3  -9 -10   25.80    6.59
  -3  -9  10   24.45    4.69
  -3  -9  10   15.56    8.82
   3  -9 -10   16.99    4.91
   3  -9 -10   10.62    6.23
   3  -9  -9  107.49    8.56
   3  -9  -9  105.86    9.26
  -3  -9   9  102.91   12.03
  -3  -9   9  120.41    7.79
   3  -9  -9  119.59    7.87
   3  -9  -8  181.55   10.02
   3  -9  -8  204.32   11.29
  -3  -9   8  180.00   11.37
  -3  -9   8  191.77   13.82
   3  -9  -8  191.63   11.47
   3  -9  -8  181.89    9.18
  -3  -9   8  189.30   10.00
   3  -9  -7   11.48    4.12
  -3  -9   7   23.62    7.21
   3  -9  -7   11.94    5.30
  -3  -9   7    5.05    4.69
  -3  -9   7   18.09    5.78
  -3  -9   7   23.19    7.84
   3  -9  -7   15.62    5.47
   3  -9  -7   12.66    4.37
  -3  -9   6   49.04    6.86
   3  -9  -6   55.53    5.40
  -3  -9   6   63.51    8.07
   3  -9  -6   49.71    6.39
   3  -9  -6   57.30    5.49
  -3  -9   6   54.78    6.71
  -3  -9   6   43.35    7.68
   3  -9  -6   55.32    6.15
   3  -9  -6   48.20    5.21
  -3  -9   5  102.49    7.86
   3  -9  -5   90.73    6.27
  -3  -9   5  109.32    8.02
   3  -9  -5   97.02    7.79
   3  -9  -5   94.90    6.59
  -3  -9   5   97.38    8.99
   3  -9  -5  108.14    6.65
  -3  -9   5  101.08    9.08
   3  -9  -4   56.77    6.43
  -3  -9   4   47.27    5.74
  -3  -9   4   46.77    6.91
  -3  -9   4   52.02    5.86
   3  -9  -4   51.53    4.99
  -3  -9   4   50.70    7.68
   3  -9  -4   46.09    4.90
   3  -9  -3   39.18    5.90
   3  -9  -3   45.20    4.71
  -3  -9   3   49.67    5.30
  -3  -9   3   38.91    5.94
   3  -9  -3   40.99    4.69
  -3  -9   3   45.33    5.31
  -3  -9   3   48.26    8.18
  -3  -9   2  193.92    8.48
  -3  -9   2  173.89    9.88
   3  -9  -2  178.23    8.95
   3  -9  -2  174.26    7.72
   3  -9  -2  158.19    9.54
   3  -9  -2  183.42    8.39
  -3  -9   2  177.10    8.56
   3  -9  -1   57.84    5.95
   3  -9  -1   56.99    4.62
  -3  -9   1   54.15    4.83
   3  -9  -1   46.56    6.14
   3  -9  -1   61.22    5.38
  -3  -9   1   58.96    5.12
   3  -9   0   43.13    6.51
   3  -9   0   40.88    5.73
  -3  -9   0   49.31    4.34
   3  -9   0   47.16    4.26
  -3  -9   0   46.82    4.96
   3  -9   0   34.58    4.76
   3  -9   1  316.05   13.35
   3  -9   1  322.98   10.15
  -3  -9  -1  334.55   10.42
   3  -9   1  360.51   14.69
  -3  -9  -1  340.11   12.20
   3  -9   1  331.18   12.79
   3  -9   2 1745.34   42.96
   3  -9   2 1746.97   36.80
   3  -9   2 1692.96   43.43
  -3  -9  -2 1720.69   37.18
   3  -9   2 1750.03   41.40
  -3  -9  -2 1754.15   40.26
  -3  -9  -3  189.74    9.84
  -3  -9  -3  183.53    7.27
   3  -9   3  183.02   11.40
   3  -9   3  191.95    6.60
   3  -9   3  201.11   11.82
  -3  -9  -3  158.78    9.09
  -3  -9  -3  172.09    7.17
  -3  -9  -4   27.48    6.03
  -3  -9  -4   28.48    3.90
   3  -9   4   30.74    2.80
   3  -9   4   29.14    7.08
   3  -9   4   25.85    7.56
  -3  -9  -4   30.55    3.73
  -3  -9  -5   19.89    6.21
  -3  -9  -5   20.87    3.94
   3  -9   5   25.49    2.24
   3  -9   5   31.30    7.34
   3  -9   5   26.33    7.36
  -3  -9  -5   20.02    3.62
   3  -9   5   27.99    3.79
  -3  -9  -6  184.31   12.03
   3  -9   6  166.57   12.45
  -3  -9  -6  183.34    8.34
   3  -9   6  174.86   13.58
  -3  -9  -6  176.49    7.87
  -3  -9  -7  176.65   12.63
  -3  -9  -7  180.11    8.97
   3  -9   7  171.66   13.64
  -3  -9  -7  167.44    8.06
   3  -9   7  168.57   12.67
  -3  -9  -8  101.71    7.53
   3  -9   8  104.26   11.44
   3  -9   8  105.17   12.29
  -3  -9  -8   97.61    6.78
   3  -9   9    2.37    9.26
  -3  -9  -9    6.70    4.41
  -3  -8  12    3.12    3.07
   3  -8 -12   -1.55    5.09
  -3  -8  12   15.65    9.97
   3  -8 -12   -0.57    7.62
   3  -8 -11    4.76    6.64
   3  -8 -11    2.07    6.54
  -3  -8  11    1.17    3.29
  -3  -8  11   -6.12    8.53
   3  -8 -11   -3.25    4.88
   3  -8 -10    9.30    5.99
   3  -8 -10    9.81    6.51
  -3  -8  10   12.60    3.77
  -3  -8  10   24.14    9.00
   3  -8 -10   12.38    4.70
   3  -8  -9  238.35   10.67
  -3  -8   9  248.89   10.48
   3  -8  -9  261.32   13.32
  -3  -8   9  237.85   12.94
  -3  -8   9  239.20   15.03
   3  -8  -9  239.62   13.45
   3  -8  -9  240.95   12.69
   3  -8  -8   49.64    6.51
   3  -8  -8   41.14    6.79
  -3  -8   8   48.23    5.68
  -3  -8   8   51.65    8.66
   3  -8  -8   41.29    7.02
   3  -8  -8   50.04    5.51
   3  -8  -7  640.86   19.20
   3  -8  -7  613.19   20.21
   3  -8  -7  641.57   18.14
  -3  -8   7  580.44   22.42
  -3  -8   7  651.07   20.69
   3  -8  -7  581.55   19.56
  -3  -8   7  619.35   19.57
   3  -8  -7  618.49   18.03
  -3  -8   6  147.05    9.42
   3  -8  -6  148.30    7.60
  -3  -8   6  138.06   10.03
   3  -8  -6  146.67    9.07
   3  -8  -6  150.02    7.84
  -3  -8   6  165.33    9.35
  -3  -8   6  152.63   11.09
   3  -8  -6  133.56    8.22
   3  -8  -6  158.42    8.27
   3  -8  -5  409.83   13.30
  -3  -8   5  425.85   14.86
   3  -8  -5  416.12   15.03
   3  -8  -5  427.82   13.42
  -3  -8   5  435.14   16.67
  -3  -8   5  419.71   14.86
   3  -8  -5  405.95   13.49
   3  -8  -5  404.63   13.09
  -3  -8   5  419.65   16.44
  -3  -8   4   81.91    8.20
   3  -8  -4   84.31    5.61
  -3  -8   4   92.61    8.38
   3  -8  -4   72.38    6.73
  -3  -8   4   96.35    8.04
  -3  -8   4   83.59    6.48
   3  -8  -4   87.89    5.64
   3  -8  -4   75.08    5.30
  -3  -8   4   82.80    6.14
  -3  -8   3   17.41    5.76
   3  -8  -3   16.95    4.51
   3  -8  -3   19.61    3.56
  -3  -8   3   13.43    3.63
  -3  -8   3   10.23    3.87
  -3  -8   3   20.15    5.13
   3  -8  -3   18.83    3.59
   3  -8  -3   15.49    3.40
  -3  -8   2    2.25    3.13
  -3  -8   2    0.97    4.29
   3  -8  -2   -0.24    3.28
  -3  -8   2   -0.23    2.96
   3  -8  -2    6.27    2.87
   3  -8  -2    5.15    3.03
   3  -8  -2   -0.31    3.58
   3  -8  -1    0.26    3.49
  -3  -8   1   -0.18    2.71
  -3  -8   1   -0.22    2.99
   3  -8  -1   -0.92    3.37
   3  -8  -1   -0.35    2.65
   3  -8  -1   -0.95    4.00
   3  -8   0  388.75   13.72
  -3  -8   0  401.11   12.70
   3  -8   0  414.62   13.37
   3  -8   0  394.36   11.38
   3  -8   0  420.11   15.10
  -3  -8   0  392.94   11.30
   3  -8   1   91.63    7.09
   3  -8   1   76.60    6.13
  -3  -8  -1   71.74    5.52
   3  -8   1   80.06    4.48
   3  -8   1   95.71    7.58
  -3  -8  -1   78.32    4.45
   3  -8   2  310.73   13.74
  -3  -8  -2  320.42    9.45
  -3  -8  -2  316.15   11.91
   3  -8   2  312.13   13.41
  -3  -8  -2  317.46    9.60
   3  -8   2  333.54    9.33
   3  -8   3  152.53    5.42
   3  -8   3  153.58    9.97
  -3  -8  -3  145.01    6.10
  -3  -8  -3  146.32    8.49
   3  -8   3  144.41    9.94
  -3  -8  -3  123.57    7.97
  -3  -8  -3  142.87    6.10
   3  -8   4  314.22    8.14
  -3  -8  -4  307.77    9.82
  -3  -8  -4  290.48   13.34
   3  -8   4  322.61   14.97
  -3  -8  -4  275.05   12.43
   3  -8   4  295.45   14.70
  -3  -8  -4  317.55    9.87
   3  -8   5  296.97    7.15
  -3  -8  -5  282.87   10.08
  -3  -8  -5  301.42   14.34
   3  -8   5  324.08   15.32
   3  -8   5  304.90   15.58
  -3  -8  -5  295.31    9.89
   3  -8   5  283.99    8.39
  -3  -8  -6   60.99    5.11
   3  -8   6   85.51    9.16
  -3  -8  -6   67.11    5.85
   3  -8   6   57.22    9.26
  -3  -8  -6   77.24    6.29
  -3  -8  -7  182.98    9.06
   3  -8   7  172.17   12.59
  -3  -8  -7  193.94    9.52
  -3  -8  -7  194.05    8.68
   3  -8   7  203.90   14.62
  -3  -8  -8   31.15    5.80
  -3  -8  -8   28.56    4.84
   3  -8   8   21.21    8.89
  -3  -8  -9   39.35    6.97
   3  -8   9   38.16   10.21
  -3  -8  -9   44.18    5.47
   3  -7 -12   10.48    7.41
  -3  -7  12    4.74    8.71
   3  -7 -12   22.89    5.73
  -3  -7  12   19.52    3.58
   3  -7 -11   53.78    8.62
  -3  -7  11   52.29    4.84
  -3  -7  11   55.02   10.63
   3  -7 -11   44.09    6.27
   3  -7 -10  170.60   11.66
  -3  -7  10  164.93    7.98
   3  -7 -10  164.79    9.50
  -3  -7  10  199.52   14.47
  -3  -7  10  171.19   11.00
   3  -7  -9   59.84    7.74
  -3  -7   9   63.12    7.93
  -3  -7   9   56.59    5.48
  -3  -7   9   42.11    8.52
   3  -7  -9   52.88    7.79
   3  -7  -9   50.13    5.71
  -3  -7   8  973.76   25.14
   3  -7  -8  951.09   24.86
  -3  -7   8  983.10   27.94
   3  -7  -8  980.27   27.97
   3  -7  -8  939.52   24.44
   3  -7  -8  953.35   27.59
  -3  -7   8  955.73   30.44
   3  -7  -8  907.04   26.73
  -3  -7   7  121.67    7.71
   3  -7  -7  124.31    7.08
  -3  -7   7  135.65    9.59
   3  -7  -7  120.53    8.60
   3  -7  -7  129.30    7.18
  -3  -7   7  126.36    8.71
  -3  -7   7  115.69   10.23
   3  -7  -7  121.92    8.48
   3  -7  -7  109.55    7.94
   3  -7  -6   17.61    3.59
  -3  -7   6   21.87    6.01
   3  -7  -6   20.37    4.86
  -3  -7   6   21.37    4.86
   3  -7  -6   14.13    3.59
  -3  -7   6   24.46    4.89
  -3  -7   6   26.26    6.25
   3  -7  -6   17.46    4.38
   3  -7  -6   20.02    4.30
   3  -7  -5   10.16    3.34
   3  -7  -5    6.75    3.45
  -3  -7   5   12.87    3.86
   3  -7  -5   14.98    4.36
   3  -7  -5    9.39    3.36
  -3  -7   5    8.53    4.07
  -3  -7   5   13.80    5.35
   3  -7  -5   11.07    3.16
  -3  -7   5    5.90    4.34
  -3  -7   4  102.70    8.08
   3  -7  -4  118.16    6.15
   3  -7  -4  113.61    7.37
  -3  -7   4  121.47    8.57
  -3  -7   4  116.68    8.07
  -3  -7   4  119.67    6.92
   3  -7  -4  108.42    5.88
  -3  -7   4  123.39    6.79
   3  -7  -4  116.36    5.96
   3  -7  -3  166.96    8.44
  -3  -7   3  173.14    8.96
  -3  -7   3  166.48    7.43
   3  -7  -3  175.27    7.36
   3  -7  -3  168.98    7.01
  -3  -7   3  149.76    7.34
   3  -7  -2  382.40   13.01
   3  -7  -2  377.52   11.19
  -3  -7   2  375.99   11.25
  -3  -7   2  372.04   13.18
  -3  -7   2  391.25   14.39
  -3  -7   2  356.23   11.50
   3  -7  -2  367.55   11.30
  -3  -7   1  113.84    7.81
  -3  -7   1   92.53    4.76
   3  -7  -1   88.77    6.53
  -3  -7   1   99.04    5.49
   3  -7  -1   95.17    5.54
   3  -7  -1   98.64    5.98
   3  -7  -1   85.51    4.82
  -3  -7   1  103.61    9.40
  -3  -7   0   34.94    3.07
   3  -7   0   44.18    4.81
  -3  -7   0   33.52    3.74
   3  -7   0   36.66    4.07
   3  -7   0   38.86    5.21
   3  -7   0   28.39    3.10
   3  -7   1   92.41    6.76
   3  -7   1   90.83    6.11
  -3  -7  -1   98.22    5.92
   3  -7   1  105.85    4.59
   3  -7   1   91.58    6.98
  -3  -7  -1   90.49    4.25
   3  -7   2  500.86   12.24
   3  -7   2  508.25   17.29
  -3  -7  -2  503.25   12.38
  -3  -7  -2  509.03   15.54
   3  -7   2  494.95   16.94
  -3  -7  -2  469.54   15.02
  -3  -7  -2  498.35   12.60
   3  -7   3   57.28    3.12
  -3  -7  -3   54.03    3.80
  -3  -7  -3   62.88    6.54
  -3  -7  -3   47.70    5.24
   3  -7   3   57.08    6.58
   3  -7   3   51.61    6.90
  -3  -7  -3   64.33    3.88
   3  -7   4   51.63    2.60
  -3  -7  -4   43.52    6.70
  -3  -7  -4   32.52    5.50
  -3  -7  -4   44.88    4.08
   3  -7   4   57.88    7.54
  -3  -7  -4   51.33    3.86
   3  -7   4   45.55    6.97
  -3  -7  -5  195.52    8.35
   3  -7   5  197.93   12.16
  -3  -7  -5  186.55   11.20
   3  -7   5  192.58   12.26
  -3  -7  -5  217.62    8.03
  -3  -7  -6  632.74   18.11
  -3  -7  -6  608.51   17.09
   3  -7   6  624.21   23.53
  -3  -7  -6  644.84   18.04
  -3  -7  -7   97.72    7.49
  -3  -7  -7  101.79    6.63
  -3  -7  -7   90.88    6.86
   3  -7   7  104.12   10.88
  -3  -7  -7  103.93    6.63
  -3  -7  -8   87.83    7.81
  -3  -7  -8   66.47    6.11
  -3  -7  -8   73.13    6.90
   3  -7   8   55.01    9.82
  -3  -7  -8   81.53    6.08
  -3  -7  -9   28.53    5.45
   3  -7   9   17.57    8.90
  -3  -7  -9   29.65    6.54
   3  -7  10   37.23    9.01
  -3  -7 -10   32.73    6.10
  -3  -7 -10   24.86    7.28
   3  -6 -13    5.65    5.67
  -3  -6  13    4.84    9.53
  -3  -6  13    2.61    3.08
   3  -6 -13    5.14    8.17
   3  -6 -12   48.73    6.76
  -3  -6  12   53.80   10.87
  -3  -6  12   47.33    4.38
   3  -6 -12   63.68    9.91
  -3  -6  11   40.21    4.23
   3  -6 -11   42.47    8.20
  -3  -6  11   24.66    6.68
  -3  -6  11   46.94    9.83
   3  -6 -11   36.51    6.03
   3  -6 -10  472.44   19.36
  -3  -6  10  503.00   18.33
   3  -6 -10  438.08   16.19
   3  -6 -10  466.06   19.14
  -3  -6  10  473.81   21.63
  -3  -6  10  500.56   14.42
   3  -6  -9  187.73   11.83
  -3  -6   9  179.43   11.02
   3  -6  -9  189.88    9.54
   3  -6  -9  177.60   11.20
  -3  -6   9  181.09   13.19
   3  -6  -9  184.32    8.73
  -3  -6   9  182.64    8.26
   3  -6  -8  430.44   13.82
  -3  -6   8  441.03   16.60
   3  -6  -8  429.04   16.74
   3  -6  -8  411.86   14.22
   3  -6  -8  417.18   16.21
  -3  -6   8  450.47   18.78
  -3  -6   8  449.33   14.11
  -3  -6   7  182.47    8.66
   3  -6  -7  179.51    8.31
  -3  -6   7  180.69   10.36
   3  -6  -7  167.90    9.85
   3  -6  -7  181.19    8.08
  -3  -6   7  182.28   11.28
   3  -6  -7  179.63    9.79
   3  -6  -7  171.31    9.47
   3  -6  -6  155.19    7.23
  -3  -6   6  128.02    7.67
  -3  -6   6  134.38    8.90
   3  -6  -6  145.83    8.40
   3  -6  -6  134.20    6.63
  -3  -6   6  130.95    7.89
  -3  -6   6  140.35    9.35
   3  -6  -6  130.67    7.79
   3  -6  -6  135.66    7.52
   3  -6  -5  339.89   11.16
   3  -6  -5  312.46   12.13
   3  -6  -5  323.50   10.75
  -3  -6   5  335.02   12.01
  -3  -6   5  355.64   13.79
   3  -6  -5  340.62   11.46
  -3  -6   5  340.57   12.90
   3  -6  -5  324.98   10.68
   3  -6  -4   37.08    3.64
  -3  -6   4   49.44    5.98
   3  -6  -4   37.71    4.81
   3  -6  -4   33.97    3.69
  -3  -6   4   46.61    4.50
  -3  -6   4   50.59    5.73
  -3  -6   4   42.84    4.40
   3  -6  -4   32.02    3.54
   3  -6  -4   43.32    3.77
  -3  -6   3 1663.56   39.74
   3  -6  -3 1662.04   38.23
  -3  -6   3 1691.14   38.86
  -3  -6   3 1729.75   36.93
   3  -6  -3 1701.42   36.65
  -3  -6   3 1674.09   36.95
   3  -6  -3 1716.47   36.15
  -3  -6   2  664.11   19.51
   3  -6  -2  670.09   18.27
   3  -6  -2  636.55   16.22
  -3  -6   2  674.25   16.24
  -3  -6   2  666.92   18.41
   3  -6  -2  641.45   16.67
  -3  -6   2  662.16   21.60
   3  -6  -2  666.58   16.40
  -3  -6   2  652.77   16.60
  -3  -6   1  316.47   12.13
   3  -6  -1  315.47   11.50
   3  -6  -1  304.72    9.20
  -3  -6   1  316.09    8.78
   3  -6  -1  301.79   10.03
  -3  -6   1  305.70   14.51
   3  -6  -1  316.72    9.80
  -3  -6   1  304.04    9.61
   3  -6   0  251.24   10.43
  -3  -6   0  252.74    7.16
   3  -6   0  245.70    7.65
   3  -6   0  244.72    9.38
  -3  -6   0  263.66   10.73
   3  -6   0  265.45    9.17
  -3  -6   0  256.14    8.74
   3  -6   1  515.58   16.28
  -3  -6  -1  506.82   11.94
   3  -6   1  474.07   14.73
  -3  -6  -1  552.12   14.93
   3  -6   1  511.31   15.68
  -3  -6  -1  511.05   12.29
   3  -6   1  537.64   12.63
   3  -6   2  292.44    7.81
  -3  -6  -2  281.24    7.79
   3  -6   2  286.54   12.10
  -3  -6  -2  300.41   11.18
   3  -6   2  287.20   11.82
  -3  -6  -2  285.21   10.45
  -3  -6  -2  288.72    8.05
   3  -6   3  191.69   10.11
  -3  -6  -3  206.88    6.78
  -3  -6  -3  198.72    6.67
   3  -6   3  202.71   10.54
  -3  -6  -3  190.83    9.15
   3  -6   3  197.12    5.63
   3  -6   4   73.52    2.64
  -3  -6  -4   61.61    6.29
  -3  -6  -4   73.62    4.93
   3  -6   4   72.53    7.25
   3  -6   4   70.69    7.67
  -3  -6  -4   69.95    4.31
  -3  -6  -5  213.20    8.16
   3  -6   5  215.92   12.67
  -3  -6  -5  192.97   11.12
  -3  -6  -5  206.20    8.79
  -3  -6  -6   89.39    6.86
  -3  -6  -6   98.98    6.47
  -3  -6  -6  107.42    6.39
   3  -6   6  100.81   10.23
  -3  -6  -6   89.87    8.81
  -3  -6  -6  100.66    6.18
  -3  -6  -7  181.00    9.12
  -3  -6  -7  197.80    8.56
   3  -6   7  206.87   13.53
  -3  -6  -7  181.74    8.95
  -3  -6  -8  268.72   11.94
  -3  -6  -8  274.40   10.22
   3  -6   8  273.37   16.19
  -3  -6  -8  284.99   11.70
   3  -6   9   60.72    9.21
  -3  -6  -9   51.13    6.60
  -3  -6  -9   57.26    6.66
   3  -6   9   57.63   10.21
  -3  -6  -9   49.10    4.99
   3  -6  10   -1.52    8.57
   3  -6  10   -4.80    7.34
  -3  -6 -10   -1.48    5.03
  -3  -5  13   30.92   10.00
  -3  -5  13   29.78    3.80
   3  -5 -13   32.34    7.09
  -3  -5  12   37.39    4.08
  -3  -5  12   43.38   10.12
   3  -5 -12   28.39    6.71
  -3  -5  12   35.62    7.35
  -3  -5  11    7.47    3.06
  -3  -5  11   -0.81    6.70
  -3  -5  11    6.68    7.38
   3  -5 -11    7.04    5.35
   3  -5 -10  253.89   14.16
  -3  -5  10  247.38   12.48
   3  -5 -10  256.36   11.91
  -3  -5  10  268.68   15.53
   3  -5 -10  219.78   13.09
  -3  -5  10  243.24    9.17
   3  -5 -10  243.77   10.40
   3  -5  -9  775.83   25.30
  -3  -5   9  799.46   23.81
   3  -5  -9  780.39   22.32
   3  -5  -9  786.86   24.52
  -3  -5   9  763.87   26.69
   3  -5  -9  763.87   20.81
  -3  -5   9  804.61   20.40
  -3  -5   8   14.62    3.59
   3  -5  -8   14.82    3.58
   3  -5  -8    6.59    5.56
  -3  -5   8   20.04    5.79
  -3  -5   8   11.23    6.66
   3  -5  -8   15.98    5.63
   3  -5  -8   15.98    4.07
   3  -5  -7   84.45    5.61
  -3  -5   7   94.26    7.48
   3  -5  -7   79.04    7.42
   3  -5  -7   80.37    5.80
  -3  -5   7   83.14    8.27
   3  -5  -7   88.89    7.08
  -3  -5   7   87.98    5.90
  -3  -5   6  101.83    7.71
   3  -5  -6  109.24    7.80
   3  -5  -6  114.27    6.05
  -3  -5   6  104.15    8.14
   3  -5  -6  111.12    6.86
   3  -5  -6  112.90    6.09
  -3  -5   6  119.23    6.79
   3  -5  -5  105.58    5.91
   3  -5  -5  100.53    6.70
   3  -5  -5   99.44    5.47
  -3  -5   5  106.44    7.29
   3  -5  -5   97.55    5.91
  -3  -5   5   93.79    6.43
   3  -5  -5   98.49    5.29
   3  -5  -4  386.70   11.29
  -3  -5   4  386.62   13.99
   3  -5  -4  383.47   12.87
   3  -5  -4  385.54   11.43
  -3  -5   4  413.18   12.16
  -3  -5   4  435.40   13.82
   3  -5  -4  395.13   11.35
  -3  -5   4  387.02   11.97
   3  -5  -4  390.76   11.16
  -3  -5   3 1235.55   30.22
  -3  -5   3 1228.39   27.15
  -3  -5   3 1246.11   29.06
   3  -5  -3 1183.26   28.49
   3  -5  -3 1197.59   26.96
  -3  -5   3 1184.34   27.15
   3  -5  -3 1263.02   26.54
  -3  -5   2  167.92    8.52
   3  -5  -2  167.35    7.49
  -3  -5   2  166.98    7.62
  -3  -5   2  168.42    6.04
   3  -5  -2  164.93    6.45
  -3  -5   2  173.67    9.86
   3  -5  -2  176.13    6.21
  -3  -5   2  177.44    6.45
  -3  -5   1  194.21    8.99
   3  -5  -1  200.71    8.10
   3  -5  -1  190.86    6.46
   3  -5  -1  184.05    6.86
  -3  -5   1  179.57    5.63
  -3  -5   1  199.04   10.73
   3  -5  -1  181.92    6.62
  -3  -5   1  183.51    6.58
  -3  -5   0   60.68    2.75
   3  -5   0   54.26    4.97
   3  -5   0   61.78    3.41
   3  -5   0   57.45    4.41
  -3  -5   0   61.64    5.65
  -3  -5   0   55.71    4.04
   3  -5   0   67.04    4.43
  -3  -5  -1  762.91   15.94
   3  -5   1  779.19   20.77
  -3  -5  -1  786.23   19.50
   3  -5   1  752.51   19.88
   3  -5   1  747.44   16.82
  -3  -5  -1  752.33   16.39
   3  -5   2  608.55   18.56
  -3  -5  -2  631.94   14.04
  -3  -5  -2  642.94   14.32
   3  -5   2  625.68   18.40
  -3  -5  -2  612.78   17.22
   3  -5   2  620.12   13.91
  -3  -5  -3   40.73    4.96
  -3  -5  -3   38.71    3.37
   3  -5   3   42.22    2.23
  -3  -5  -3   48.35    3.27
   3  -5   3   51.77    5.87
  -3  -5  -4  413.79   11.81
  -3  -5  -4  424.35   11.84
  -3  -5  -4  418.32   15.02
   3  -5   4  404.39   15.94
  -3  -5  -5  219.60    8.59
   3  -5   5  220.05   12.23
  -3  -5  -5  227.18   11.74
  -3  -5  -5  225.11    8.74
  -3  -5  -6  572.26   16.82
  -3  -5  -6  576.95   15.92
  -3  -5  -6  583.49   20.87
   3  -5   6  543.16   21.31
  -3  -5  -6  614.08   17.09
  -3  -5  -7  168.88    8.92
  -3  -5  -7  177.57    7.66
  -3  -5  -7  199.48   12.86
   3  -5   7  184.43   13.02
  -3  -5  -7  178.75    9.09
  -3  -5  -8   62.96    6.69
   3  -5   8   80.17   10.17
  -3  -5  -8   64.60    5.06
   3  -5   8   66.64    8.45
  -3  -5  -8   64.24    6.80
  -3  -5  -9   27.87    5.71
   3  -5   9   21.02    8.36
  -3  -5  -9   27.15    3.93
  -3  -5  -9   21.09    5.89
   3  -5   9   22.02    6.93
   3  -5  10   14.72    8.88
  -3  -5 -10   11.51    5.66
   3  -5  11    3.94    9.41
  -3  -5 -11   17.23    6.53
   3  -4 -13  227.26   13.04
  -3  -4  13  225.41   16.36
  -3  -4  13  240.56    9.04
  -3  -4  13  249.61   12.87
  -3  -4  12   53.87    4.52
  -3  -4  12   44.86    9.83
   3  -4 -12   51.17    7.60
  -3  -4  12   45.31    7.48
  -3  -4  11   50.78    4.50
   3  -4 -11   52.47    5.57
  -3  -4  11   40.56    7.29
   3  -4 -11   55.14    7.17
  -3  -4  10  106.55    8.67
   3  -4 -10   92.78    9.38
  -3  -4  10   99.06   10.15
   3  -4 -10   88.54    6.37
  -3  -4  10   98.69    5.72
   3  -4 -10   95.71    8.00
  -3  -4   9  104.39    8.55
   3  -4  -9  122.83    9.45
  -3  -4   9  132.12   10.78
  -3  -4   9  127.95    6.39
   3  -4  -9  118.46    6.84
   3  -4  -9  143.72    8.57
  -3  -4   8  324.61   13.19
   3  -4  -8  312.61   12.21
   3  -4  -8  310.27   13.39
  -3  -4   8  351.37   15.54
  -3  -4   8  327.12   10.89
   3  -4  -8  325.66   11.18
   3  -4  -7   55.50    6.71
  -3  -4   7   60.30    6.34
   3  -4  -7   59.42    5.24
   3  -4  -7   61.38    6.06
  -3  -4   7   61.15    7.02
   3  -4  -7   57.52    4.66
  -3  -4   7   76.45    5.20
   3  -4  -6  352.92   11.13
  -3  -4   6  346.56   13.24
   3  -4  -6  363.68   13.34
   3  -4  -6  370.93   11.66
  -3  -4   6  372.51   14.14
   3  -4  -6  351.51   12.41
  -3  -4   6  375.67   12.01
  -3  -4   5  508.27   15.44
   3  -4  -5  547.16   16.22
   3  -4  -5  530.78   14.23
  -3  -4   5  518.63   16.55
   3  -4  -5  531.50   14.91
   3  -4  -5  528.30   14.23
  -3  -4   4  835.42   22.37
   3  -4  -4  822.33   21.20
   3  -4  -4  824.92   19.53
  -3  -4   4  841.19   21.54
   3  -4  -4  822.29   19.43
   3  -4  -4  807.64   19.17
  -3  -4   4  803.85   19.62
  -3  -4   3  259.91   10.51
  -3  -4   3  263.71   10.68
   3  -4  -3  257.95    9.46
   3  -4  -3  249.67    8.32
  -3  -4   3  275.34    9.63
   3  -4  -3  271.44    7.67
  -3  -4   3  273.59    8.28
   3  -4  -3  258.14    7.54
  -3  -4   2 1101.11   26.94
   3  -4  -2 1116.28   25.64
  -3  -4   2 1112.57   23.25
  -3  -4   2 1127.54   25.39
  -3  -4   2 1084.24   27.99
  -3  -4   2 1121.44   23.89
   3  -4  -2 1074.12   23.47
  -3  -4   1  534.02   15.46
   3  -4  -1  520.60   14.40
   3  -4  -1  531.53   12.85
   3  -4  -1  505.86   12.83
  -3  -4   1  525.08   11.30
  -3  -4   1  555.49   17.54
   3  -4  -1  524.80   12.89
  -3  -4   1  525.93   12.76
  -3  -4   0  203.59    8.41
   3  -4   0  196.94    7.87
   3  -4   0  178.62    5.85
   3  -4   0  185.27    7.01
  -3  -4   0  188.48    6.77
   3  -4   0  180.97    6.70
  -3  -4   0  175.29   10.00
   3  -4   1 1612.00   32.54
  -3  -4  -1 1654.47   35.56
  -3  -4  -1 1578.49   31.29
   3  -4   1 1646.32   35.59
  -3  -4  -1 1628.13   34.91
  -3  -4  -1 1599.41   31.82
  -3  -4  -2  463.12   10.93
  -3  -4  -2  439.15   10.73
   3  -4   2  469.80   10.49
   3  -4   2  442.39   14.29
  -3  -4  -2  430.05   13.51
  -3  -4  -2  457.59   10.89
  -3  -4  -3  172.10    6.21
   3  -4   3  185.58    4.84
   3  -4   3  183.38    9.39
  -3  -4  -3  193.29    9.11
  -3  -4  -3  193.28    6.63
  -3  -4  -4   48.93    3.99
   3  -4   4   51.35    6.18
  -3  -4  -4   49.30    5.92
  -3  -4  -4   49.14    4.09
  -3  -4  -5  342.25   11.05
   3  -4   5  334.05   14.47
  -3  -4  -5  318.76   13.90
  -3  -4  -5  313.52   11.21
  -3  -4  -6   52.18    5.24
  -3  -4  -6   53.66    4.35
  -3  -4  -6   45.88    7.44
   3  -4   6   64.42    8.29
  -3  -4  -6   60.26    5.85
   3  -4   7  353.97   15.51
  -3  -4  -7  386.73   13.69
  -3  -4  -7  392.95   11.48
  -3  -4  -7  360.57   16.95
   3  -4   7  379.63   17.57
  -3  -4  -7  366.85   13.87
  -3  -4  -8   84.34    7.35
   3  -4   8   76.27    8.31
  -3  -4  -8   83.27    5.13
   3  -4   8  102.10   10.71
  -3  -4  -8   92.21    7.85
  -3  -4  -9    8.47    5.21
   3  -4   9    9.19    7.97
  -3  -4  -9    3.59    5.74
  -3  -4  -9    5.10    3.07
   3  -4  10   17.79    8.56
  -3  -4 -10   22.46    6.57
   3  -4  11   59.44   10.94
  -3  -4 -11   55.57    8.11
  -3  -3  14   28.28    9.88
  -3  -3  14   28.90    4.27
   3  -3 -14   23.90    7.66
  -3  -3  13   29.90    4.16
  -3  -3  13   34.25    6.89
  -3  -3  13   17.23    8.70
   3  -3 -13   17.57    6.75
   3  -3 -12  119.07    9.86
  -3  -3  12  138.91   12.78
  -3  -3  12  122.17    6.36
  -3  -3  12  112.16    9.32
  -3  -3  11   12.53    3.27
   3  -3 -11   14.15    4.24
  -3  -3  11   12.25    6.03
  -3  -3  11    8.48    7.23
   3  -3 -11    8.03    6.60
   3  -3 -11   11.63    6.22
   3  -3 -10   16.74    4.08
  -3  -3  10   16.86    3.50
  -3  -3  10   27.00    8.77
  -3  -3  10   13.56    5.76
   3  -3 -10   17.25    6.74
  -3  -3  10   14.87    6.79
   3  -3 -10   23.04    5.71
   3  -3  -9  864.89   25.37
  -3  -3   9  973.85   30.62
  -3  -3   9  941.96   25.77
   3  -3  -9  942.29   27.10
  -3  -3   9  913.31   28.43
   3  -3  -9  897.82   23.19
  -3  -3   9  942.22   22.39
   3  -3  -8   67.45    4.98
  -3  -3   8   60.53    4.55
  -3  -3   8   63.04    8.55
  -3  -3   8   60.35    6.52
  -3  -3   8   74.61    7.98
   3  -3  -8   55.65    6.58
   3  -3  -8   58.10    5.86
  -3  -3   7   19.37    3.24
   3  -3  -7   17.25    3.23
  -3  -3   7   22.48    6.10
  -3  -3   7   19.32    4.89
  -3  -3   7   30.40    5.78
   3  -3  -7   15.85    4.43
   3  -3  -7   15.30    4.04
  -3  -3   6  260.54   10.88
  -3  -3   6  265.92   12.29
   3  -3  -6  291.03   10.61
  -3  -3   6  259.44   11.29
   3  -3  -6  262.60    9.04
  -3  -3   6  269.20    9.45
   3  -3  -5  932.49   24.17
   3  -3  -5  924.42   21.78
  -3  -3   5  925.38   24.08
   3  -3  -5  948.41   22.63
  -3  -3   5  914.47   24.94
  -3  -3   4  585.86   17.06
   3  -3  -4  589.08   16.26
   3  -3  -4  592.55   14.83
  -3  -3   4  597.79   16.34
   3  -3  -4  588.06   14.71
   3  -3  -4  566.93   14.55
  -3  -3   3  538.14   15.81
  -3  -3   3  559.75   16.18
   3  -3  -3  566.24   15.07
   3  -3  -3  562.50   13.98
  -3  -3   3  566.31   14.79
   3  -3  -3  559.96   13.08
   3  -3  -3  573.26   12.84
  -3  -3   3  544.00   13.38
   3  -3  -2 1305.61   28.26
  -3  -3   2 1322.82   27.88
  -3  -3   2 1260.46   29.61
  -3  -3   2 1296.46   30.25
  -3  -3   2 1277.70   26.48
   3  -3  -2 1250.74   26.08
   3  -3  -1  645.90   14.96
  -3  -3   1  680.16   17.80
  -3  -3   1  712.74   19.14
   3  -3  -1  681.98   15.20
  -3  -3   1  690.55   15.05
   3  -3   0 1105.81   23.38
  -3  -3   0 1070.23   25.55
   3  -3   0 1130.56   24.25
  -3  -3   0 1122.57   24.45
  -3  -3   0 1084.24   27.93
   3  -3   1 3037.06   60.62
  -3  -3  -1 3100.64   62.88
  -3  -3  -1 3142.02   59.50
  -3  -3  -1 3115.38   59.57
  -3  -3  -1 3050.59   66.66
  -3  -3  -1 3145.39   62.88
   3  -3   1 3114.50   63.15
  -3  -3  -1 3049.30   59.79
  -3  -3  -2   95.68    4.07
  -3  -3  -2   88.70    4.94
  -3  -3  -2  100.14    4.00
  -3  -3  -2   87.15    5.75
   3  -3   2  103.40    6.30
   3  -3   2   92.10    3.48
  -3  -3  -3  816.46   18.63
   3  -3   3  784.84   16.46
  -3  -3  -3  819.55   19.16
   3  -3   3  811.70   22.12
  -3  -3  -3  830.32   21.96
  -3  -3  -4   85.70    4.98
  -3  -3  -4   95.97    5.63
  -3  -3  -4   90.12    7.16
   3  -3   4   84.21    7.14
  -3  -3  -5  107.73    6.21
   3  -3   5  114.02    7.77
   3  -3   5  105.59    8.42
  -3  -3  -5  109.25    8.42
  -3  -3  -5  103.44    6.68
  -3  -3  -6  461.81   14.47
   3  -3   6  433.97   16.17
  -3  -3  -6  433.31   12.06
  -3  -3  -6  462.58   15.41
   3  -3   6  412.96   17.38
  -3  -3  -6  434.89   17.53
  -3  -3  -7   30.32    5.15
   3  -3   7   37.93    6.20
  -3  -3  -7   30.96    7.67
   3  -3   7   37.68    7.21
  -3  -3  -7   24.19    5.56
  -3  -3  -8   31.94    5.87
   3  -3   8   27.34    6.16
  -3  -3  -8   26.43    3.37
   3  -3   8   31.70    8.07
  -3  -3  -8   27.45    5.97
  -3  -3  -9   39.37    6.72
   3  -3   9   45.45    8.60
  -3  -3  -9   41.21    7.30
  -3  -3  -9   44.93    3.76
   3  -3  10   50.62    9.38
  -3  -3 -10   55.85    8.47
   3  -3  11  248.12   17.04
  -3  -3 -11  218.06   13.28
  -3  -2  14   58.92   10.49
   3  -2 -14   71.95    9.52
  -3  -2  13    6.83    5.77
  -3  -2  13    4.82    7.55
  -3  -2  13    6.90    3.59
   3  -2 -13    5.33    6.78
  -3  -2  12   20.05    6.41
  -3  -2  12   29.33    8.35
   3  -2 -12   28.55    4.94
  -3  -2  12   28.92    4.13
   3  -2 -12   34.38    7.68
  -3  -2  11   61.39    7.00
   3  -2 -11   68.87    8.88
  -3  -2  11   68.36    9.28
   3  -2 -11   66.93    5.76
  -3  -2  11   60.98    4.87
   3  -2 -11   49.00    7.75
  -3  -2  10  272.70   12.29
  -3  -2  10  277.77   15.18
   3  -2 -10  263.77   13.85
  -3  -2  10  279.84    9.66
   3  -2 -10  274.90   10.64
  -3  -2  10  271.58   16.29
   3  -2 -10  301.04   13.54
  -3  -2   9  373.83   14.27
  -3  -2   9  399.38   16.62
   3  -2  -9  386.09   15.72
  -3  -2   9  393.44   11.81
   3  -2  -9  395.57   12.80
  -3  -2   9  395.14   18.46
  -3  -2   8   51.98    6.24
  -3  -2   8   66.31    7.30
   3  -2  -8   48.88    6.40
  -3  -2   8   56.29    4.20
   3  -2  -8   55.69    4.68
  -3  -2   8   60.46    8.32
  -3  -2   7  134.98    8.14
  -3  -2   7  127.80    8.59
   3  -2  -7  125.13    7.74
   3  -2  -7  132.22    6.42
  -3  -2   7  139.83    6.23
  -3  -2   7  150.44   10.20
  -3  -2   6  206.27    9.43
  -3  -2   6  201.47   10.66
  -3  -2   6  215.70    7.86
   3  -2  -6  197.03    7.68
  -3  -2   6  206.51    9.63
   3  -2  -6  201.88    8.90
  -3  -2   5  903.91   24.59
  -3  -2   5  922.14   23.36
   3  -2  -5  925.67   22.19
   3  -2  -5  924.96   21.56
  -3  -2   4  383.40   12.67
   3  -2  -4  391.16   12.30
  -3  -2   4  399.63   11.93
   3  -2  -4  393.86   10.95
   3  -2  -4  385.50   10.70
  -3  -2   4  390.24   12.80
  -3  -2   3 4197.14   83.77
  -3  -2   3 4249.19   84.34
  -3  -2   3 4180.44   83.01
  -3  -2   3 4309.53   82.53
   3  -2  -3 4075.90   80.52
   3  -2  -3 4156.10   80.92
   3  -2  -3 4191.86   82.27
  -3  -2   2   91.88    5.48
  -3  -2   2   97.53    4.17
  -3  -2   2   87.97    5.65
   3  -2  -2   85.79    2.72
   3  -2  -2   91.46    2.90
  -3  -2   2   86.34    3.09
  -3  -2   1  213.88    8.04
   3  -2  -1  227.58    5.63
   3  -2  -1  215.89    5.98
  -3  -2   1  231.49    5.89
  -3  -2   1  221.99    8.61
   3  -2   0  487.69   11.80
  -3  -2   0  483.63   13.14
  -3  -2   0  510.59   12.14
   3  -2   0  481.38   11.86
  -3  -2   0  504.27   14.57
  -3  -2  -1 1417.57   30.49
  -3  -2  -1 1437.93   28.27
  -3  -2  -1 1428.00   28.66
  -3  -2  -1 1403.40   30.89
   3  -2   1 1436.49   30.92
   3  -2   1 1406.88   29.23
  -3  -2  -1 1395.17   32.98
  -3  -2  -2 1249.75   26.68
  -3  -2  -2 1261.45   27.15
  -3  -2  -2 1254.99   29.18
   3  -2   2 1229.42   28.92
  -3  -2  -2 1212.88   30.19
   3  -2   2 1263.31   25.99
  -3  -2  -2 1269.64   26.38
  -3  -2  -3 1099.00   24.70
  -3  -2  -3 1122.55   25.93
   3  -2   3 1109.45   27.64
  -3  -2  -3 1118.99   27.70
   3  -2   4  211.97    9.46
  -3  -2  -4  217.97    8.18
  -3  -2  -4  226.02    9.44
   3  -2   4  214.96   10.33
  -3  -2  -4  227.89   10.61
  -3  -2  -5   98.09    6.24
   3  -2   5  110.63    7.35
  -3  -2  -5  119.12    8.56
   3  -2   5  107.56    8.16
  -3  -2  -5  121.81    7.61
  -3  -2  -6   38.23    5.11
   3  -2   6   31.57    5.43
  -3  -2  -6   32.40    3.03
  -3  -2  -6   40.62    6.84
   3  -2   6   38.60    6.27
  -3  -2  -6   40.35    6.21
   3  -2   7  463.89   17.22
  -3  -2  -7  487.07   16.20
  -3  -2  -7  483.17   12.41
   3  -2   7  550.97   20.22
  -3  -2  -7  496.49   19.57
  -3  -2  -7  522.37   18.17
  -3  -2  -8  438.96   16.01
  -3  -2  -8  431.74   11.48
   3  -2   8  459.63   19.80
  -3  -2  -8  462.79   19.65
  -3  -2  -8  458.23   17.90
  -3  -2  -9   11.86    5.72
   3  -2   9   15.21    7.11
  -3  -2  -9   17.98    6.91
  -3  -2  -9   10.72    2.48
   3  -2  10   13.23    7.76
  -3  -2 -10    8.34    6.50
   3  -2  11   33.84    9.12
  -3  -2 -11   32.53    8.28
  -3  -1  14   26.75    9.16
   3  -1 -14   25.34    8.33
  -3  -1  14   33.35    4.72
   3  -1 -13    8.51    6.63
  -3  -1  13   17.88    8.26
  -3  -1  13   16.69    5.91
  -3  -1  13   15.62    3.79
  -3  -1  12    9.80    6.86
  -3  -1  12   12.66    5.89
  -3  -1  12    9.96    3.64
   3  -1 -12   13.77    4.58
   3  -1 -11   34.77    7.90
  -3  -1  11   12.24    6.72
  -3  -1  11   19.53    5.86
  -3  -1  11   26.77    3.79
   3  -1 -11   19.59    4.40
  -3  -1  10  128.21   12.07
  -3  -1  10  150.66   11.20
   3  -1 -10  139.85   10.19
  -3  -1  10  131.90    8.69
  -3  -1  10  133.09    6.66
   3  -1 -10  138.91    7.46
  -3  -1   9  245.60   14.74
  -3  -1   9  276.39   13.31
   3  -1  -9  228.24   11.95
  -3  -1   9  238.36   11.00
  -3  -1   9  262.03    9.06
   3  -1  -9  252.30    9.74
  -3  -1   8  295.10   14.90
  -3  -1   8  316.11   13.64
   3  -1  -8  301.34   12.82
  -3  -1   8  311.08   12.13
  -3  -1   8  311.98    9.96
   3  -1  -8  322.06   10.77
  -3  -1   7   40.39    6.85
   3  -1  -7   45.90    5.38
  -3  -1   7   32.33    5.31
  -3  -1   7   41.93    5.32
   3  -1  -7   38.14    3.93
  -3  -1   7   34.77    3.30
  -3  -1   6   57.97    6.84
   3  -1  -6   67.07    5.56
  -3  -1   6   67.74    5.91
  -3  -1   6   55.65    5.57
   3  -1  -6   59.91    4.42
  -3  -1   5  269.66    9.92
   3  -1  -5  281.20    9.49
  -3  -1   5  275.88   11.38
   3  -1  -5  249.76    8.85
  -3  -1   4 5818.72  117.39
  -3  -1   4 5904.40  115.83
   3  -1  -4 5929.09  115.64
  -3  -1   4 5993.29  116.02
   3  -1  -4 5920.13  115.08
  -3  -1   4 5932.94  117.33
  -3  -1   3 1762.60   38.68
  -3  -1   3 1747.19   37.61
   3  -1  -3 1772.68   37.30
  -3  -1   3 1801.57   36.73
   3  -1  -3 1805.54   35.69
  -3  -1   3 1809.71   37.88
   3  -1  -2 3068.18   61.58
  -3  -1   2 3036.72   62.63
  -3  -1   2 3166.24   60.15
  -3  -1   2 3114.19   62.35
  -3  -1   2 3049.90   59.04
  -3  -1   2 3087.84   60.41
  -3  -1   1   56.05    4.23
  -3  -1   1   67.02    2.50
  -3  -1   1   65.54    4.23
  -3  -1   0  635.04   15.74
  -3  -1   0  668.03   13.54
  -3  -1   0  659.72   14.99
   3  -1   0  647.45   14.48
  -3  -1   0  666.54   16.50
  -3  -1  -1 1288.59   27.26
  -3  -1  -1 1307.97   26.23
  -3  -1  -1 1257.89   27.14
   3  -1   1 1238.33   27.75
  -3  -1  -1 1341.30   28.43
  -3  -1  -1 1282.71   28.81
   3  -1   1 1287.38   27.30
  -3  -1  -2 1375.47   28.04
  -3  -1  -2 1387.65   28.72
   3  -1   2 1341.17   30.04
   3  -1   2 1315.89   28.90
  -3  -1  -2 1358.56   30.51
   3  -1   2 1362.70   30.65
  -3  -1  -2 1328.91   30.92
  -3  -1  -2 1366.22   30.05
  -3  -1  -3   69.98    4.45
   3  -1   3   69.65    5.09
  -3  -1  -3   68.35    5.00
   3  -1   3   69.06    5.63
  -3  -1  -3   64.50    5.73
  -3  -1  -3   58.95    5.26
  -3  -1  -4   48.32    4.53
   3  -1   4   41.98    4.74
  -3  -1  -4   44.22    4.39
  -3  -1  -4   49.60    5.45
   3  -1   4   38.25    5.05
  -3  -1  -4   49.44    5.91
   3  -1   5  197.98    9.05
  -3  -1  -5  170.25    8.30
  -3  -1  -5  191.82   10.12
   3  -1   5  195.38   10.14
  -3  -1  -5  188.03   10.41
   3  -1   6   85.64    6.78
  -3  -1  -6   71.66    6.18
   3  -1   6   75.11    7.58
  -3  -1  -6   87.07    8.30
  -3  -1  -6   67.08    7.45
  -3  -1  -7  616.04   19.39
  -3  -1  -7  650.16   14.71
  -3  -1  -7  653.66   22.90
   3  -1   7  670.00   22.89
  -3  -1  -7  635.57   21.78
  -3  -1  -8   32.57    5.88
  -3  -1  -8   23.46    2.39
  -3  -1  -8   22.09    8.19
   3  -1   8   34.60    7.37
  -3  -1  -8   28.20    7.26
  -3  -1  -9    2.67    6.50
  -3  -1  -9    4.30    3.83
  -3  -1  -9    5.87    5.42
   3  -1   9    0.58    6.77
  -3  -1  -9    1.49    1.86
   3  -1  10   43.12    9.11
  -3  -1 -10   36.73    8.29
   3  -1  11   50.14    9.53
  -3  -1 -11   47.36    9.54
  -3   0  14   78.50    6.28
  -3   0  14   71.84   10.64
  -3   0  13   33.52    4.74
  -3   0  13   34.22    8.66
  -3   0  12   71.10    7.54
  -3   0  12   68.23    5.58
   3   0 -12   64.47    6.28
  -3   0  12   66.16    9.48
  -3   0  11   51.36    6.77
  -3   0  11   59.27    8.29
   3   0 -11   53.00    8.37
  -3   0  11   45.55    4.78
   3   0 -11   63.92    5.83
  -3   0  10  134.72    6.82
  -3   0  10  129.73   12.30
  -3   0  10  132.17    8.71
   3   0 -10  141.91    9.76
   3   0 -10  132.25   10.00
  -3   0  10  128.55    9.98
   3   0 -10  135.34    7.43
  -3   0   9  259.31    9.23
  -3   0   9  252.60   14.91
  -3   0   9  245.32   11.08
   3   0  -9  252.14   11.70
   3   0  -9  268.32   12.55
  -3   0   9  256.38   12.83
   3   0  -9  253.99    9.90
  -3   0   8   24.53    4.69
   3   0  -8   33.68    5.67
  -3   0   8   24.30    5.47
  -3   0   8   22.39    3.21
   3   0  -8   29.60    4.10
  -3   0   8   17.81    6.61
  -3   0   7 1361.31   32.34
  -3   0   7 1338.40   33.29
   3   0  -7 1386.91   32.90
   3   0  -7 1349.91   30.90
  -3   0   7 1333.38   30.05
  -3   0   7 1394.91   35.76
  -3   0   6  354.94   12.34
  -3   0   6  342.37   12.32
   3   0  -6  372.54   12.22
  -3   0   6  365.77   14.29
   3   0  -6  372.85   11.37
   3   0  -5 1548.65   33.90
  -3   0   5 1555.82   34.46
   3   0  -5 1546.51   34.13
  -3   0   5 1560.30   36.24
  -3   0   4  800.76   18.82
  -3   0   4  809.00   20.34
  -3   0   4  787.77   20.20
   3   0  -4  834.10   18.67
  -3   0   4  812.67   18.96
   3   0  -4  787.94   19.31
  -3   0   3 1340.96   28.50
  -3   0   3 1333.83   28.56
  -3   0   3 1284.39   29.43
   3   0  -3 1327.05   29.20
   3   0  -3 1315.18   26.90
  -3   0   3 1319.23   27.31
   3   0  -3 1310.87   28.89
  -3   0   2 1001.53   22.87
   3   0  -2 1022.14   22.62
   3   0  -2  963.07   20.04
  -3   0   2  989.34   20.77
  -3   0   2 1011.85   19.90
   3   0  -2  982.94   22.49
  -3   0   2 1001.43   22.07
  -3   0   1 4888.12   97.08
  -3   0   1 4971.61   94.32
  -3   0   1 4999.82   94.51
  -3   0   1 4885.60   96.70
  -3   0   1 4907.71   95.51
  -3   0   0  182.24    6.45
   3   0   0  192.21    5.64
  -3   0   0  195.93    5.43
  -3   0   0  183.76    5.87
   3   0   0  194.62    5.34
  -3   0   0  190.87    6.33
  -3   0  -1 1183.72   25.43
  -3   0  -1 1229.65   25.44
  -3   0  -1 1213.97   26.92
   3   0   1 1208.50   25.71
  -3   0  -1 1226.22   26.72
   3   0   1 1197.49   26.06
  -3   0  -1 1225.45   25.98
   3   0   1 1200.96   27.03
  -3   0  -2 3154.04   62.01
  -3   0  -2 3211.39   63.66
  -3   0  -2 3196.45   65.85
   3   0   2 3203.41   63.85
  -3   0  -2 3185.44   65.39
   3   0   2 3135.13   64.73
  -3   0  -2 3191.87   63.22
  -3   0  -3  135.39    6.29
  -3   0  -3  126.23    7.68
   3   0   3  128.50    7.05
  -3   0  -3  143.49    7.67
  -3   0  -3  123.37    5.14
   3   0   3  130.03    6.16
  -3   0  -4   34.25    5.42
   3   0   4   31.68    3.94
  -3   0  -4   38.35    4.32
  -3   0  -4   36.79    5.46
  -3   0  -4   34.21    3.13
   3   0   5 1343.83   35.36
  -3   0  -5 1341.31   34.97
  -3   0  -5 1379.84   27.41
  -3   0  -5 1346.07   32.17
  -3   0  -5 1323.14   34.48
  -3   0  -5 1340.34   29.18
   3   0   6   30.49    7.07
  -3   0  -6   43.91    6.83
  -3   0  -6   42.84    2.27
  -3   0  -6   35.56    5.03
  -3   0  -6   37.61    6.88
  -3   0  -6   43.09    3.55
   3   0   7 1233.09   35.23
  -3   0  -7 1251.89   34.41
  -3   0  -7 1186.73   24.08
  -3   0  -7 1140.76   30.53
  -3   0  -7 1200.29   33.73
  -3   0  -7 1190.26   26.09
  -3   0  -8   80.33    9.35
  -3   0  -8   74.55    2.98
  -3   0  -8   77.70    7.59
  -3   0  -8   88.28   10.06
  -3   0  -8   82.95    4.31
  -3   0  -9    7.64    5.62
  -3   0  -9    4.02    7.15
  -3   0  -9    7.88    2.29
  -3   0  -9   13.54    1.61
  -3   0 -10   10.58    7.74
  -3   0 -11   22.39    8.69
   3   0  11   24.65    8.05
  -3   1  14   30.45    5.23
  -3   1  14   30.64    8.33
  -3   1  13    9.87    4.18
  -3   1  13   17.94    7.31
  -3   1  12    9.93    5.29
   3   1 -12    4.67    4.45
  -3   1  12   12.25    6.69
  -3   1  11   16.01    5.54
  -3   1  11   25.00    6.64
   3   1 -11   14.13    6.99
  -3   1  11   26.09    4.33
   3   1 -11   27.25    5.02
  -3   1  10  139.19    7.10
  -3   1  10  143.44   12.51
  -3   1  10  143.34    8.85
   3   1 -10  151.63   10.43
  -3   1  10  144.01   10.28
   3   1 -10  132.61    7.70
  -3   1   9  238.97    9.23
  -3   1   9  260.70   14.79
  -3   1   9  260.35   11.24
   3   1  -9  262.01   12.56
  -3   1   9  228.69   12.04
   3   1  -9  264.82   10.25
  -3   1   8  302.71   10.24
  -3   1   8  312.85   12.02
  -3   1   8  333.22   15.31
   3   1  -8  331.43   13.08
  -3   1   8  329.67   13.27
   3   1  -8  323.62   11.28
  -3   1   7   33.19    4.85
  -3   1   7   25.51    6.02
   3   1  -7   32.29    4.61
  -3   1   7   34.88    5.04
   3   1  -7   43.53    5.31
   3   1  -7   41.25    4.31
  -3   1   7   37.06    3.57
  -3   1   6   53.16    5.28
   3   1  -6   55.72    5.05
   3   1  -6   50.53    4.58
  -3   1   6   56.92    5.14
   3   1  -6   59.73    5.21
  -3   1   6   64.12    6.76
   3   1  -5  262.92    9.89
  -3   1   5  270.24   10.75
  -3   1   5  265.05    8.48
   3   1  -5  271.39    9.42
  -3   1   5  273.34    9.38
   3   1  -5  260.79    9.37
  -3   1   4 5920.46  115.36
   3   1  -4 5778.33  115.50
   3   1  -4 5672.82  114.77
  -3   1   4 5858.95  115.37
  -3   1   4 5901.32  113.79
   3   1  -4 5913.46  113.89
  -3   1   4 5779.39  113.55
   3   1  -4 5903.52  115.17
   3   1  -3 1722.11   37.70
  -3   1   3 1765.66   36.34
   3   1  -3 1760.71   37.86
  -3   1   3 1783.88   37.52
   3   1  -3 1755.75   36.03
  -3   1   3 1689.03   36.36
   3   1  -3 1766.18   35.53
  -3   1   3 1718.02   34.82
   3   1  -3 1778.84   34.35
  -3   1   2 3140.11   62.37
   3   1  -2 3070.43   62.75
  -3   1   2 2973.82   61.85
  -3   1   2 3097.78   61.38
   3   1  -2 3134.68   59.70
  -3   1   2 3041.72   60.47
   3   1  -2 3086.08   63.11
   3   1  -2 3118.97   59.30
  -3   1   1   65.12    3.48
   3   1  -1   67.59    2.39
  -3   1   1   62.12    4.04
  -3   1   1   67.05    3.36
  -3   1   1   62.51    2.10
  -3   1   1   66.65    2.59
   3   1  -1   68.95    4.66
  -3   1   0  642.76   14.79
   3   1   0  669.35   13.67
  -3   1   0  660.61   14.67
  -3   1   0  624.09   14.40
  -3   1   0  637.73   15.10
  -3   1  -1 1293.05   27.42
  -3   1  -1 1319.58   26.42
   3   1   1 1229.31   26.28
  -3   1  -1 1295.63   27.99
   3   1   1 1296.76   27.03
  -3   1  -1 1276.02   26.66
  -3   1  -2 1318.92   27.27
   3   1   2 1322.56   27.53
  -3   1  -2 1348.04   27.38
  -3   1  -2 1373.30   29.57
   3   1   2 1361.02   28.47
  -3   1  -2 1359.18   30.66
   3   1   2 1375.13   30.45
  -3   1  -3   63.73    4.93
  -3   1  -3   64.03    2.66
   3   1   3   65.32    2.59
  -3   1  -3   63.81    6.34
  -3   1  -3   64.31    5.70
  -3   1  -3   67.51    2.75
  -3   1  -4   45.99    6.27
   3   1   4   49.19    5.90
  -3   1  -4   57.19    5.00
  -3   1  -4   43.49    5.56
  -3   1  -4   46.49    2.12
  -3   1  -5  193.33    4.70
  -3   1  -5  203.78    9.14
  -3   1  -5  188.64   10.46
  -3   1  -5  195.60    4.38
   3   1   5  195.78   10.84
  -3   1  -5  192.80   11.29
  -3   1  -6   79.96    8.83
   3   1   6   74.54    8.07
  -3   1  -6   93.56    7.07
  -3   1  -6   73.03    8.09
  -3   1  -7  619.14   23.20
  -3   1  -7  648.18   22.24
  -3   1  -7  622.34   19.70
  -3   1  -8   25.77    7.53
   3   1   8   29.98    8.64
  -3   1  -8   25.31    7.98
  -3   1  -8   21.83    6.04
  -3   1  -9   -0.62    7.30
  -3   1 -10   42.00    9.32
  -3   1 -11   54.15   10.32
  -3   2  14   61.21    9.41
  -3   2  13    8.84    5.47
  -3   2  13   10.33    6.99
  -3   2  13    8.53    4.27
  -3   2  12   19.33    6.04
  -3   2  12   29.61    7.76
   3   2 -12   29.94    5.36
  -3   2  12   30.45    4.99
  -3   2  11   59.76    7.03
  -3   2  11   62.33    7.92
   3   2 -11   65.27    6.41
  -3   2  10  261.96   10.20
  -3   2  10  280.12   16.27
  -3   2  10  285.29   12.12
   3   2 -10  278.56   13.44
  -3   2  10  243.25   12.81
   3   2 -10  274.67   11.28
  -3   2   9  372.04   12.53
  -3   2   9  402.88   14.26
   3   2  -9  412.57   14.07
  -3   2   9  409.41   18.33
   3   2  -9  388.42   15.55
  -3   2   9  407.97   15.47
   3   2  -9  396.35   13.59
  -3   2   8   55.76    5.80
   3   2  -8   56.85    5.66
  -3   2   8   52.58    4.53
   3   2  -8   56.87    5.30
  -3   2   8   65.09    6.38
   3   2  -8   58.33    6.66
  -3   2   8   68.51    8.17
   3   2  -7  140.44    7.69
  -3   2   7  133.98    7.48
   3   2  -7  133.98    7.97
  -3   2   7  133.16    9.32
   3   2  -7  131.80    9.05
  -3   2   7  124.71    7.29
   3   2  -7  139.78    7.19
   3   2  -6  206.70    9.09
  -3   2   6  198.40    8.70
   3   2  -6  193.33   10.01
  -3   2   6  183.55    9.76
   3   2  -6  205.44    8.85
  -3   2   6  208.77    8.48
   3   2  -6  203.12    8.56
   3   2  -5  938.03   23.12
   3   2  -5  899.74   23.24
  -3   2   5  876.84   23.50
   3   2  -5  941.51   23.97
  -3   2   5  927.81   21.40
   3   2  -5  910.47   22.44
   3   2  -5  950.53   22.48
  -3   2   5  933.79   21.67
   3   2  -5  898.55   20.75
   3   2  -4  388.53   12.38
   3   2  -4  383.40   12.55
  -3   2   4  377.73   11.69
   3   2  -4  394.58   12.17
  -3   2   4  387.99   10.71
   3   2  -4  382.74   11.04
   3   2  -4  390.00   11.18
  -3   2   4  381.16   10.04
   3   2  -4  385.99    9.77
  -3   2   3 4266.77   83.59
   3   2  -3 4216.70   85.88
  -3   2   3 4200.04   83.77
   3   2  -3 4238.86   84.00
   3   2  -3 4372.62   83.43
   3   2  -3 4273.71   83.37
   3   2  -3 4252.29   86.14
   3   2  -3 4238.44   82.05
  -3   2   2   98.82    4.16
   3   2  -2   85.10    5.55
  -3   2   2   93.68    5.02
  -3   2   2   97.59    3.86
   3   2  -2   93.48    3.65
   3   2  -2   91.27    3.51
   3   2  -2   86.51    5.99
   3   2  -2   89.50    3.20
  -3   2   2   92.21    3.40
  -3   2   1  224.96    5.58
  -3   2   1  212.63    7.11
   3   2  -1  213.61    9.15
  -3   2   1  223.60    6.05
  -3   2   1  221.47    6.45
  -3   2   0  488.64   12.55
  -3   2   0  493.52   11.56
  -3   2   0  508.77   11.51
  -3   2   0  503.29   11.67
  -3   2  -1 1414.51   30.60
   3   2   1 1401.67   29.69
  -3   2  -1 1442.01   30.47
   3   2   1 1410.08   30.35
  -3   2  -1 1419.44   28.44
   3   2   2 1261.32   26.98
   3   2   2 1263.96   28.66
  -3   2  -2 1239.95   28.43
  -3   2  -2 1280.66   29.04
  -3   2  -2 1268.60   25.11
   3   2   3 1119.09   23.33
   3   2   3 1100.28   27.01
  -3   2  -3 1075.89   29.30
  -3   2  -3 1075.24   26.03
  -3   2  -3 1076.39   26.95
  -3   2  -3 1097.90   21.41
  -3   2  -4  222.02    9.28
  -3   2  -4  214.49    9.99
   3   2   4  218.08    5.86
  -3   2  -4  207.32    5.59
   3   2   4  215.89   10.32
  -3   2  -4  209.03   11.47
  -3   2  -5  102.14    9.04
   3   2   5  111.79    8.46
  -3   2  -5  108.80    8.20
  -3   2  -5  111.02    7.21
  -3   2  -6   38.12    5.54
  -3   2  -6   32.41    6.36
  -3   2  -6   44.87    8.05
   3   2   6   40.84    7.31
  -3   2  -7  530.62   19.52
  -3   2  -7  491.02   17.35
   3   2   7  511.95   20.28
  -3   2  -7  527.03   21.72
  -3   2  -8  451.28   18.91
  -3   2  -8  461.19   17.31
  -3   2  -8  449.11   20.66
   3   2   8  478.62   20.48
   3   2   9   15.62    8.53
  -3   2  -9    2.02    8.09
  -3   2 -10   13.54    8.51
  -3   2 -11   20.35    9.32
  -3   3  14   41.39    8.34
   3   3 -14   33.48   10.17
   3   3 -13   25.27    9.39
  -3   3  13   10.84    6.20
  -3   3  13   13.75    7.03
  -3   3  13   38.23    5.73
  -3   3  12   96.35    7.22
  -3   3  12  107.70    8.87
   3   3 -12  109.43   12.09
  -3   3  12  120.77   10.13
   3   3 -12  119.22    8.54
  -3   3  11   17.90    5.69
  -3   3  11   12.99    4.40
   3   3 -11   12.67    7.72
  -3   3  11   19.66    5.98
   3   3 -11   12.47    4.99
   3   3 -10   20.28    5.18
  -3   3  10   19.52    4.28
  -3   3  10   20.02    5.63
   3   3 -10   14.04    4.91
   3   3 -10   12.21    7.45
  -3   3  10   15.70    8.17
   3   3 -10   10.56    6.13
  -3   3  10   12.36    5.23
  -3   3   9  898.82   24.54
   3   3  -9  963.25   25.27
  -3   3   9  898.01   28.93
   3   3  -9  897.14   29.11
  -3   3   9  866.48   23.06
   3   3  -9  944.17   26.59
   3   3  -9  908.80   26.35
  -3   3   9  986.75   26.34
   3   3  -9  906.23   24.61
   3   3  -8   57.03    6.01
  -3   3   8   70.87    6.22
  -3   3   8   67.42    8.20
   3   3  -8   53.84    7.80
  -3   3   8   47.81    4.59
   3   3  -8   81.06    7.08
   3   3  -8   65.44    6.75
  -3   3   8   65.55    5.98
   3   3  -8   67.20    6.01
   3   3  -7   14.82    4.16
  -3   3   7   22.40    5.79
   3   3  -7   25.64    6.12
   3   3  -7   16.11    4.48
   3   3  -7   19.20    4.66
   3   3  -7   11.83    4.46
  -3   3   7   23.86    3.97
   3   3  -7   16.19    3.41
   3   3  -6  266.37   10.75
   3   3  -6  278.14   11.16
  -3   3   6  270.45   11.57
   3   3  -6  262.57   12.11
   3   3  -6  271.16   10.54
   3   3  -6  287.61   10.77
  -3   3   6  274.72    9.60
   3   3  -6  260.25    9.01
   3   3  -5  926.77   24.08
   3   3  -5  913.67   24.09
   3   3  -5  909.54   24.76
  -3   3   5  940.47   23.67
  -3   3   5  918.69   21.78
   3   3  -5  908.00   22.84
   3   3  -5  929.52   22.85
  -3   3   5  961.25   21.62
   3   3  -5  928.81   21.22
  -3   3   4  561.02   14.75
   3   3  -4  599.61   17.17
  -3   3   4  558.00   15.49
   3   3  -4  578.18   16.67
   3   3  -4  585.67   15.14
   3   3  -4  586.63   15.31
   3   3  -4  592.73   17.33
   3   3  -4  581.49   13.81
  -3   3   3  564.78   13.87
   3   3  -3  548.52   16.05
  -3   3   3  539.68   15.57
   3   3  -3  541.43   14.81
  -3   3   3  554.76   13.86
   3   3  -3  568.74   13.63
   3   3  -3  514.13   16.47
   3   3  -3  545.16   12.62
  -3   3   2 1313.70   27.41
   3   3  -2 1304.57   30.10
  -3   3   2 1280.96   28.65
   3   3  -2 1290.66   27.45
   3   3  -2 1259.06   26.31
   3   3  -2 1306.81   31.42
  -3   3   2 1293.29   27.05
   3   3  -2 1280.17   26.58
  -3   3   2 1291.12   26.70
  -3   3   1  681.06   14.90
  -3   3   1  678.05   16.70
  -3   3   1  647.66   15.28
   3   3  -1  693.85   13.56
  -3   3   1  686.27   15.52
  -3   3   0 1132.53   23.46
  -3   3   0 1118.45   24.79
   3   3   0 1077.12   22.14
  -3   3   0 1096.71   23.38
  -3   3   0 1093.47   23.56
  -3   3   0 1126.98   23.12
   3   3   1 3147.83   63.03
  -3   3  -1 3100.20   62.77
   3   3   1 3026.61   61.05
  -3   3  -1 2970.43   61.92
  -3   3  -1 3154.10   60.09
  -3   3  -1 3088.60   61.76
   3   3   2   84.33    5.01
  -3   3  -2  102.21    5.95
   3   3   2   97.18    5.50
  -3   3  -2   91.45    5.67
  -3   3  -2   90.64    3.06
  -3   3  -2   97.09    5.18
  -3   3  -3  817.37   20.91
   3   3   3  799.82   21.11
  -3   3  -3  808.10   21.23
   3   3   3  802.48   18.85
  -3   3  -3  766.04   23.92
  -3   3  -4   94.45    7.03
  -3   3  -4   90.89    8.85
   3   3   4   89.03    7.07
  -3   3  -4   91.43    6.53
   3   3   4   90.89    4.48
  -3   3  -5  114.28    8.05
  -3   3  -5  105.90    9.69
   3   3   5  128.37    8.90
  -3   3  -5  115.99    7.54
  -3   3  -5   95.79    4.09
   3   3   5  102.93    4.39
  -3   3  -6  425.56   16.51
  -3   3  -6  443.00   19.53
   3   3   6  447.95   17.65
  -3   3  -6  470.49   16.02
   3   3   6  422.80    9.93
  -3   3  -7   37.29    6.30
   3   3   7   33.62    7.78
  -3   3  -7   24.09    8.13
  -3   3  -7   27.55    6.87
  -3   3  -8   37.54    6.80
  -3   3  -8   34.85    9.08
   3   3   8   34.95    8.55
  -3   3  -8   38.42    7.84
  -3   3  -9   44.61    9.33
  -3   3 -10   60.99   11.37
  -3   3 -11  204.08   16.57
   3   4 -13  256.60   17.54
  -3   4  13  243.94   14.05
  -3   4  13  232.97   12.45
  -3   4  12   47.23    6.78
   3   4 -12   56.79   10.64
  -3   4  12   56.37    7.63
  -3   4  12   50.27    6.19
  -3   4  11   35.28    5.51
  -3   4  11   48.65    6.94
   3   4 -11   65.94    6.88
   3   4 -11   46.04    9.58
  -3   4  11   50.55    7.12
   3   4 -11   58.39    7.01
   3   4 -10   89.06    7.64
  -3   4  10   74.96    6.40
   3   4 -10   91.69    7.83
  -3   4  10   78.59    7.46
   3   4 -10  112.00   11.10
   3   4 -10   94.03    8.72
  -3   4  10   97.01    7.97
   3   4 -10   97.71    9.07
   3   4 -10  102.57    7.22
   3   4  -9  123.33    8.62
   3   4  -9  126.40    8.58
  -3   4   9  134.78    8.31
   3   4  -9  128.59   11.18
  -3   4   9  117.66   10.75
  -3   4   9  102.02    6.90
   3   4  -9  121.92    8.94
   3   4  -9  115.56    9.08
  -3   4   9  130.78    8.26
   3   4  -9  130.32    7.69
   3   4  -8  318.28   12.83
  -3   4   8  307.40   14.67
   3   4  -8  293.12   15.30
   3   4  -8  291.65   12.70
   3   4  -8  309.12   13.00
   3   4  -8  334.04   13.25
  -3   4   8  335.30   12.34
   3   4  -8  327.04   11.49
   3   4  -7   65.67    6.29
   3   4  -7   55.27    6.33
  -3   4   7   45.87    6.80
   3   4  -7   68.49    8.11
   3   4  -7   66.79    6.37
   3   4  -7   68.94    6.37
  -3   4   7   67.09    5.34
   3   4  -7   69.15    4.99
  -3   4   6  349.88   11.39
   3   4  -6  379.42   15.14
  -3   4   6  377.70   13.62
   3   4  -6  357.89   13.49
   3   4  -6  360.43   12.58
   3   4  -6  349.62   12.39
   3   4  -6  350.38   13.41
   3   4  -6  349.88   10.94
  -3   4   5  521.27   14.47
   3   4  -5  519.11   17.62
  -3   4   5  514.60   15.73
   3   4  -5  536.55   16.98
   3   4  -5  547.16   15.36
   3   4  -5  520.80   15.34
   3   4  -5  512.09   17.12
   3   4  -5  549.29   13.86
  -3   4   4  804.88   19.77
   3   4  -4  829.25   22.48
   3   4  -4  832.05   22.40
  -3   4   4  799.24   20.15
   3   4  -4  817.70   19.84
   3   4  -4  818.81   20.26
   3   4  -4  815.30   23.19
   3   4  -4  816.60   18.66
  -3   4   3  263.29    8.73
   3   4  -3  266.33   10.95
  -3   4   3  261.50   10.21
  -3   4   3  266.78    8.61
   3   4  -3  280.75   10.02
   3   4  -3  261.88    8.19
   3   4  -3  267.32   11.95
   3   4  -3  275.07    7.80
  -3   4   2 1099.60   24.08
   3   4  -2 1116.28   27.24
  -3   4   2 1087.75   23.74
  -3   4   2 1081.23   23.66
   3   4  -2 1128.09   23.65
   3   4  -2 1058.73   22.77
  -3   4   2 1076.09   25.45
  -3   4   1  547.13   12.74
   3   4  -1  529.15   11.19
  -3   4   1  555.00   14.47
   3   4  -1  530.32   11.32
  -3   4   1  539.41   13.12
  -3   4   1  542.36   13.19
  -3   4   0  180.83    6.21
  -3   4   0  185.81    7.42
   3   4   0  181.10    5.13
  -3   4   0  178.36    6.33
  -3   4   0  202.03    6.07
   3   4   1 1587.41   35.94
  -3   4  -1 1576.63   35.36
   3   4   1 1637.76   33.42
  -3   4  -1 1582.31   34.41
  -3   4  -1 1623.42   32.77
  -3   4  -1 1622.66   34.16
  -3   4  -2  476.01   13.85
   3   4   2  438.35   12.62
  -3   4  -2  437.03   13.26
   3   4   2  456.20   13.46
  -3   4  -2  468.77   12.92
  -3   4  -3  185.81    8.55
  -3   4  -3  177.71    8.42
   3   4   3  177.43    8.18
   3   4   3  175.05    7.48
  -3   4  -3  186.90    7.78
   3   4   4   49.69    4.36
  -3   4  -4   45.46    3.81
   3   4   4   35.83    5.43
  -3   4  -4   42.81    7.10
  -3   4  -4   50.46    5.39
  -3   4  -4   48.99    5.69
  -3   4  -4   41.67    4.75
  -3   4  -5  316.20   13.14
  -3   4  -5  332.81   16.34
   3   4   5  346.10   13.91
  -3   4  -5  321.90   12.70
  -3   4  -5  310.61    9.42
   3   4   5  307.98    9.75
   3   4   6   56.68    7.85
  -3   4  -6   53.78    8.91
  -3   4  -6   54.21    6.55
  -3   4  -6   56.14    7.17
   3   4   6   58.43    4.13
  -3   4  -6   50.61    3.73
  -3   4  -7  366.88   16.09
  -3   4  -7  367.00    8.96
   3   4   7  353.76    9.60
  -3   4  -7  386.36   15.32
  -3   4  -7  377.56   19.71
   3   4   7  391.93   17.40
   3   4   8   94.31   10.58
  -3   4  -8   78.51   11.38
  -3   4  -9   13.92    9.00
  -3   4 -10   31.70   10.51
  -3   4 -11   82.02   12.81
  -3   5  13   32.98    7.06
   3   5 -13   37.46   10.43
   3   5 -12   29.51    6.33
   3   5 -12   37.05    9.96
  -3   5  12   33.13    6.67
  -3   5  12   42.80    7.15
   3   5 -11    7.69    5.77
  -3   5  11    1.76    5.34
  -3   5  11    0.33    4.24
  -3   5  11    0.84    4.89
   3   5 -11    0.84    6.02
   3   5 -11    7.82    8.69
   3   5 -10  249.95   12.46
   3   5 -10  244.42   12.11
  -3   5  10  238.55   11.46
   3   5 -10  278.21   16.75
  -3   5  10  247.14   11.85
   3   5 -10  243.28   10.85
   3   5  -9  787.73   24.09
   3   5  -9  749.56   23.61
  -3   5   9  798.62   26.54
   3   5  -9  813.16   28.33
  -3   5   9  713.77   21.33
   3   5  -9  775.92   23.96
   3   5  -9  833.98   24.53
  -3   5   9  850.31   23.16
   3   5  -9  801.24   21.74
   3   5  -8    8.91    6.77
  -3   5   8   13.59    6.13
   3   5  -8   18.88    5.82
   3   5  -8   22.01    5.79
   3   5  -8   22.68    5.75
   3   5  -8   13.81    5.70
   3   5  -8   11.79    3.66
  -3   5   7   87.54    7.89
   3   5  -7   96.89    9.45
   3   5  -7   95.61    7.86
   3   5  -7   94.63    7.40
   3   5  -7   91.14    7.05
   3   5  -7   84.49    7.81
   3   5  -7   93.81    5.86
  -3   5   6   96.42    6.04
   3   5  -6  110.19    9.13
  -3   5   6  106.22    7.46
   3   5  -6  105.23    7.79
   3   5  -6  118.68    7.09
   3   5  -6  105.84    7.01
   3   5  -6   98.83    7.83
   3   5  -6  111.79    5.81
  -3   5   5  101.77    5.81
   3   5  -5  100.99    7.65
  -3   5   5   96.48    6.53
   3   5  -5   95.65    8.05
   3   5  -5  103.44    6.23
   3   5  -5   95.22    6.16
   3   5  -5   91.15    7.89
   3   5  -5  108.95    5.32
   3   5  -4  397.43   11.86
   3   5  -4  401.46   14.57
  -3   5   4  384.52   12.21
   3   5  -4  430.51   14.77
  -3   5   4  393.92   12.06
   3   5  -4  404.81   11.05
   3   5  -3 1223.30   26.30
  -3   5   3 1192.88   28.84
   3   5  -3 1162.98   30.16
  -3   5   3 1191.40   26.82
   3   5  -3 1215.90   29.27
   3   5  -3 1220.97   26.08
  -3   5   3 1131.18   26.92
  -3   5   2  163.50    6.55
   3   5  -2  163.28    8.97
  -3   5   2  171.68    6.41
  -3   5   2  180.12    6.73
   3   5  -2  176.84    6.55
   3   5  -2  167.02    5.61
  -3   5   2  164.47    7.58
   3   5  -1  195.95    7.94
  -3   5   1  194.45    6.58
   3   5  -1  195.60    5.27
  -3   5   1  182.28    7.77
  -3   5   1  191.77    6.75
   3   5  -1  189.69    5.31
  -3   5   1  197.37    6.91
  -3   5   0   65.86    3.94
  -3   5   0   61.98    4.90
   3   5   0   56.81    2.91
  -3   5   0   59.82    3.98
  -3   5   0   58.28    3.64
  -3   5  -1  770.13   19.80
   3   5   1  774.76   17.59
  -3   5  -1  749.90   18.79
   3   5   1  766.02   20.72
  -3   5  -1  765.85   18.41
  -3   5  -2  626.27   17.60
   3   5   2  646.96   16.41
  -3   5  -2  642.39   17.10
   3   5   2  610.18   17.68
  -3   5  -2  627.98   16.44
  -3   5  -3   39.99    5.14
   3   5   3   45.00    5.01
  -3   5  -3   42.79    5.06
   3   5   3   44.56    4.84
  -3   5  -3   49.49    4.53
  -3   5  -4  433.91   14.68
   3   5   4  447.02   15.01
  -3   5  -4  429.81   14.70
  -3   5  -4  395.74   12.49
   3   5   4  423.46   13.25
  -3   5  -4  442.10   13.87
  -3   5  -5  230.07   10.93
   3   5   5  235.31   11.70
  -3   5  -5  236.72   11.23
  -3   5  -5  240.82    8.90
   3   5   5  234.28    9.08
  -3   5  -5  256.36   10.58
  -3   5  -6  564.92   18.99
   3   5   6  579.51   20.55
  -3   5  -6  566.96   23.78
  -3   5  -6  572.86   19.47
   3   5   6  579.06   15.70
  -3   5  -6  557.64   15.18
  -3   5  -6  604.98   18.29
  -3   5  -7  175.81   10.70
  -3   5  -7  201.29   15.31
   3   5   7  183.24   12.35
   3   5   7  164.87    7.11
  -3   5  -7  188.42    7.00
  -3   5  -7  183.02    9.86
  -3   5  -7  176.73   11.40
  -3   5  -8   65.58    3.76
   3   5   8   63.08    4.28
   3   5   8   58.21    9.33
  -3   5  -8   52.73   10.58
   3   5   9   16.50    1.71
   3   5   9   14.40    1.89
  -3   5 -10   -5.15    9.84
  -3   5 -11   19.71   10.74
   3   6 -13   15.06   10.80
   3   6 -13   -0.39    5.79
   3   6 -12   43.01   10.71
   3   6 -12   40.04    7.22
   3   6 -11   48.20   10.55
   3   6 -11   47.71    7.18
  -3   6  11   43.12    6.54
   3   6 -10  486.85   22.56
   3   6 -10  478.65   18.17
   3   6  -9  203.16   11.47
   3   6  -9  184.01   11.02
   3   6  -9  186.89   11.10
   3   6  -9  200.19   14.51
  -3   6   9  166.04    9.10
   3   6  -9  197.96    9.31
  -3   6   8  445.09   17.98
   3   6  -8  445.18   20.12
   3   6  -8  448.14   17.12
   3   6  -8  434.37   14.14
   3   6  -8  427.28   15.93
   3   6  -8  452.98   16.34
  -3   6   7  180.43   10.60
   3   6  -7  172.24   12.40
   3   6  -7  188.86    9.88
   3   6  -7  167.32    9.45
   3   6  -7  204.60   11.07
   3   6  -7  179.33    8.12
   3   6  -6  147.65    9.68
   3   6  -6  136.53    7.81
  -3   6   6  120.00    8.30
   3   6  -6  134.41   10.26
   3   6  -6  150.55    8.42
  -3   6   6  158.95    7.80
   3   6  -6  152.10    6.99
   3   6  -5  328.58   13.96
   3   6  -5  329.83   11.44
  -3   6   5  328.33   11.93
   3   6  -5  317.09   14.26
   3   6  -5  331.04   10.45
  -3   6   5  331.23   11.36
  -3   6   4   31.74    4.11
   3   6  -4   45.31    6.22
  -3   6   4   32.08    5.38
   3   6  -4   43.17    6.05
   3   6  -4   36.81    4.09
  -3   6   4   44.43    4.48
   3   6  -4   44.45    3.75
   3   6  -3 1691.73   35.96
  -3   6   3 1687.39   38.97
   3   6  -3 1710.69   40.88
  -3   6   3 1685.02   36.55
   3   6  -3 1737.33   36.15
  -3   6   3 1629.62   36.89
  -3   6   2  617.61   16.73
   3   6  -2  705.56   20.62
   3   6  -2  663.89   15.01
  -3   6   2  669.07   16.50
  -3   6   2  628.14   18.10
   3   6  -2  679.56   15.51
  -3   6   2  678.64   17.03
   3   6  -2  638.52   16.63
  -3   6   1  320.69   10.95
   3   6  -1  322.52    8.18
   3   6  -1  308.96   10.73
  -3   6   1  312.34    9.56
  -3   6   1  310.55    9.58
   3   6  -1  314.31    8.06
  -3   6   1  304.24    9.66
   3   6   0  249.66    7.09
  -3   6   0  260.30    9.69
   3   6   0  255.26    7.10
  -3   6   0  253.26    8.47
  -3   6   0  258.01    8.45
  -3   6  -1  523.71   15.47
   3   6   1  528.56   13.05
   3   6   1  502.28   16.51
  -3   6  -1  510.81   13.98
  -3   6  -2  281.27   10.91
   3   6   2  294.61    9.64
  -3   6  -2  285.30   10.36
   3   6   2  263.83   11.10
  -3   6  -2  292.07    9.74
  -3   6  -3  184.26    9.28
   3   6   3  210.71    8.98
  -3   6  -3  201.82    9.17
   3   6   3  190.48    9.20
  -3   6  -3  199.61    8.40
  -3   6  -4   59.05    6.49
   3   6   4   75.32    6.76
  -3   6  -4   74.51    6.57
   3   6   4   74.36    6.25
  -3   6  -4   71.79    5.71
  -3   6  -4   73.06    5.67
  -3   6  -5  190.12   10.35
  -3   6  -5  198.75   13.53
   3   6   5  217.63   11.23
  -3   6  -5  189.97   10.37
  -3   6  -5  186.33    8.62
   3   6   5  207.10    9.30
  -3   6  -5  211.83    9.62
  -3   6  -6  105.39    6.51
   3   6   6   91.91    6.49
  -3   6  -6  111.69    8.57
  -3   6  -6   96.45   11.39
   3   6   6   87.03    8.79
  -3   6  -6   84.52    8.06
  -3   6  -6  106.76    7.63
  -3   6  -7  170.50    7.85
   3   6   7  199.48    8.59
  -3   6  -7  191.26   15.38
   3   6   7  194.42   12.82
  -3   6  -7  182.53   11.41
   3   6   8  270.70    9.82
  -3   6  -8  266.22    9.13
   3   6   8  267.91   15.99
  -3   6  -8  296.41   19.05
   3   6   9   41.50    4.21
  -3   6  -9   47.39   11.58
  -3   6 -10    1.80    9.39
   3   7 -12   28.40    6.84
   3   7 -12   29.96   10.59
   3   7 -11   63.82    8.27
   3   7 -11   46.89   10.56
   3   7 -10  174.97   11.40
   3   7 -10  187.28   15.16
   3   7  -9   39.39    9.75
   3   7  -9   48.24    7.41
   3   7  -9   58.35    8.24
   3   7  -9   67.22    6.18
   3   7  -8  973.29   27.10
  -3   7   8  914.14   28.45
   3   7  -8 1031.15   33.16
   3   7  -8  954.49   27.20
   3   7  -8  999.91   29.07
   3   7  -8  953.02   24.81
   3   7  -7  123.14    8.25
   3   7  -7  112.36    8.47
   3   7  -7  108.25    9.38
   3   7  -7  128.60   11.57
  -3   7   7  121.96    9.13
   3   7  -7  133.76    7.12
   3   7  -6   22.55    4.64
   3   7  -6   14.30    5.96
   3   7  -6   13.66    3.61
  -3   7   6    8.82    4.79
   3   7  -6   18.38    6.87
  -3   7   5    8.58    3.78
   3   7  -5   13.05    5.69
   3   7  -5    8.86    5.61
   3   7  -5   12.22    3.84
  -3   7   5   14.61    4.24
   3   7  -5    7.49    3.29
  -3   7   4  120.10    6.80
   3   7  -4  119.30    6.33
  -3   7   4  110.73    8.15
   3   7  -4  109.28    8.95
   3   7  -4  117.75    5.92
  -3   7   3  160.74    7.19
   3   7  -3  151.57    9.72
   3   7  -3  164.10    6.99
  -3   7   3  158.78    8.67
   3   7  -3  183.62    6.99
   3   7  -2  364.55   14.78
   3   7  -2  371.42   10.34
  -3   7   2  376.63   13.11
   3   7  -2  391.58   12.06
  -3   7   2  364.27   11.86
   3   7  -2  380.64    9.98
  -3   7   2  381.40   11.33
  -3   7   1   98.73    6.50
   3   7  -1   88.82    4.14
   3   7  -1  103.75    6.51
  -3   7   1   88.34    5.26
  -3   7   1   84.86    4.95
   3   7  -1   96.64    4.02
  -3   7   0   37.61    4.89
   3   7   0   37.02    3.04
  -3   7   0   41.60    3.82
   3   7   0   32.59    2.77
  -3   7   0   38.85    3.84
   3   7   1   84.96    7.17
   3   7   1   95.99    4.76
  -3   7  -1   95.38    6.52
  -3   7  -1   96.25    5.38
  -3   7  -1   95.03    5.34
  -3   7  -2  524.74   16.18
   3   7   2  510.36   14.23
   3   7   2  472.74   16.69
  -3   7  -2  508.02   14.53
  -3   7  -3   57.43    5.77
   3   7   3   55.41    5.56
  -3   7  -3   49.10    5.50
   3   7   3   59.18    6.41
  -3   7  -3   51.50    4.87
  -3   7  -4   45.02    6.14
   3   7   4   57.83    6.41
  -3   7  -4   51.58    6.11
  -3   7  -4   56.27    5.90
   3   7   4   49.20    6.08
  -3   7  -4   50.50    5.18
  -3   7  -5  200.03   11.02
   3   7   5  217.40   11.35
  -3   7  -5  184.89    9.40
   3   7   5  190.67    9.73
  -3   7  -5  197.31   14.09
  -3   7  -5  201.63    9.47
  -3   7  -5  187.91   10.34
   3   7   6  655.68   22.06
   3   7   6  633.27   18.97
  -3   7  -6  593.74   18.27
  -3   7  -6  642.76   19.41
  -3   7  -6  648.38   21.06
   3   7   7   91.56    6.91
  -3   7  -7   97.80    6.78
   3   7   7   97.14   10.27
  -3   7  -7   91.87   12.15
   3   7   8   69.77    6.20
  -3   7  -8   71.18    5.74
   3   7   9   20.98    4.51
  -3   7  -9   23.39   10.36
  -3   7 -10   36.76   11.51
   3   8 -12    5.26    6.44
   3   8 -12   -1.75    9.66
   3   8 -11    5.41    6.72
   3   8 -11    0.84    9.27
   3   8 -10    8.97    6.56
   3   8 -10   30.05    9.87
   3   8  -9  241.07   13.82
   3   8  -9  241.85   16.75
   3   8  -8   51.74    9.55
   3   8  -8   51.06    7.07
   3   8  -8   56.23    8.23
   3   8  -8   48.30    5.43
  -3   8   7  620.57   21.06
   3   8  -7  664.50   25.28
   3   8  -7  634.82   19.93
   3   8  -7  681.44   23.12
   3   8  -7  644.21   18.28
  -3   8   6  149.91    9.18
   3   8  -6  140.41   11.54
   3   8  -6  163.58    8.75
   3   8  -6  148.59   10.84
   3   8  -6  147.67    7.42
   3   8  -5  448.14   18.34
  -3   8   5  392.06   14.23
   3   8  -5  446.22   14.07
   3   8  -5  428.40   17.46
   3   8  -5  413.24   13.02
  -3   8   4   75.62    6.02
   3   8  -4   77.74    8.33
   3   8  -4   88.66    5.64
   3   8  -4   92.75    5.83
   3   8  -3   10.07    5.73
  -3   8   3   17.68    3.64
   3   8  -3   16.10    3.65
   3   8  -3   21.03    3.44
   3   8  -2    2.55    5.48
   3   8  -2    2.58    2.54
  -3   8   2    4.65    4.13
  -3   8   2   -1.97    3.73
   3   8  -2   10.74    3.79
  -3   8   2    1.98    2.74
   3   8  -2    4.31    2.21
   3   8  -1    1.06    2.25
  -3   8   1   -0.28    3.81
   3   8  -1    2.18    2.06
  -3   8   1    2.30    2.89
  -3   8   1    3.62    3.36
   3   8  -1    3.75    4.35
   3   8   0  385.90   10.73
  -3   8   0  394.12   13.69
   3   8   0  401.97   11.08
  -3   8   0  413.94   12.31
  -3   8   0  410.92   12.34
   3   8   1   75.20    7.64
   3   8   1   83.49    4.79
  -3   8  -1   76.52    6.33
  -3   8  -1   75.29    5.30
  -3   8  -1   71.55    5.37
  -3   8  -2  326.63   12.48
   3   8   2  320.74   10.74
   3   8   2  322.13   13.81
  -3   8  -2  318.85   11.07
  -3   8  -3  148.53    8.85
   3   8   3  145.53    7.93
  -3   8  -3  148.47    8.50
  -3   8  -3  158.15    9.21
   3   8   3  138.32    9.16
  -3   8  -3  140.56    7.45
  -3   8  -4  316.00   13.29
   3   8   4  331.20   13.11
   3   8   4  303.97   13.23
  -3   8  -4  317.79   11.83
  -3   8  -4  330.13   13.13
  -3   8  -5  270.43   12.20
   3   8   5  294.40   12.82
  -3   8  -5  297.52   11.94
  -3   8  -5  277.72   12.67
  -3   8  -6   63.83   10.42
   3   8   6   59.14    8.27
  -3   8  -6   69.64    6.80
   3   8   6   60.98    6.89
   3   8   7  200.57   13.19
  -3   8  -7  162.94   14.66
   3   8   7  190.17   10.10
  -3   8  -7  162.84    9.23
  -3   8  -8   13.99    9.56
   3   8   8   20.87    5.37
  -3   8  -8   34.58    5.33
  -3   8  -9   51.18   11.83
   3   8   9   47.56    5.95
   3   9 -11   33.39   11.73
   3   9 -11   33.92    8.14
   3   9 -10    7.50    9.18
   3   9 -10   20.43    7.63
   3   9  -9   89.77   12.78
   3   9  -9  123.44   10.88
   3   9  -8  187.98   15.18
   3   9  -8  174.01   12.26
   3   9  -8  209.89   11.18
   3   9  -7   15.04    5.30
   3   9  -7   21.41    8.51
   3   9  -7   20.63    7.08
   3   9  -7   13.33    4.38
   3   9  -6   60.22    8.81
   3   9  -6   47.08    9.38
   3   9  -6   63.05    6.27
  -3   9   6   57.62    6.78
   3   9  -6   54.34    5.41
   3   9  -5   95.93   10.06
  -3   9   5  108.34    7.65
   3   9  -5  100.82    9.69
   3   9  -5   85.78    6.17
   3   9  -5  107.40    7.04
   3   9  -4   53.47    8.09
  -3   9   4   52.21    5.51
   3   9  -4   59.68    5.35
   3   9  -4   48.36    4.94
   3   9  -3   57.60    8.29
   3   9  -3   50.85    3.99
  -3   9   3   39.47    4.72
   3   9  -3   46.27    5.16
   3   9  -3   48.02    4.55
   3   9  -2  162.52   11.23
   3   9  -2  179.70    7.30
   3   9  -2  185.41    9.16
  -3   9   2  188.41    9.46
  -3   9   2  189.35    8.14
   3   9  -2  186.22    6.84
   3   9  -1   52.59    4.15
  -3   9   1   50.42    4.62
   3   9  -1   53.69    3.78
  -3   9   1   57.97    5.63
   3   9  -1   46.41    6.34
   3   9   0   44.06    3.73
   3   9   0   45.33    4.21
  -3   9   0   48.37    5.93
  -3   9   0   39.42    4.42
  -3   9   0   48.19    4.99
   3   9   1  341.37   14.98
   3   9   1  330.18   10.37
  -3   9  -1  337.18   13.04
  -3   9  -1  330.99   11.26
  -3   9  -1  301.33   11.14
   3   9   2 1797.75   43.74
   3   9   2 1728.06   38.42
  -3   9  -2 1730.85   41.02
  -3   9  -2 1748.34   39.01
  -3   9  -2 1707.13   39.03
  -3   9  -3  186.33   10.01
   3   9   3  198.81    9.25
  -3   9  -3  188.70   10.83
   3   9   3  156.16   10.54
  -3   9  -3  190.18    8.81
   3   9   4   27.92    5.69
   3   9   4   24.14    6.05
  -3   9  -4   27.59    5.93
  -3   9  -4   27.00    5.10
  -3   9  -4   24.84    5.77
  -3   9  -5   26.55    6.22
  -3   9  -5   30.20    6.17
   3   9   5   23.74    6.30
   3   9   5   27.27    6.57
   3   9   6  166.17   10.40
  -3   9  -6  163.80   10.04
  -3   9  -6  162.31   14.47
   3   9   6  175.65   11.90
   3   9   7  172.91   10.40
  -3   9  -7  170.18    9.98
   3   9   7  169.96   12.54
   3   9   8   85.60    8.03
  -3   9  -8   98.44   13.60
   3   9   9    3.70    5.06
  -3   9  -9    0.96   10.33
   3  10 -11   45.27    9.12
   3  10 -11   47.39   11.90
   3  10 -10   90.05   10.35
   3  10 -10   82.45   13.24
   3  10  -9  121.31   11.33
   3  10  -9  101.77   13.29
   3  10  -8   64.16    9.42
   3  10  -8   37.85   10.41
   3  10  -7  179.69   12.81
   3  10  -7  171.14   13.96
   3  10  -7  166.29    9.91
   3  10  -6   75.50    9.79
   3  10  -6   78.10    6.90
   3  10  -5   38.55    8.15
   3  10  -5   44.73    5.49
   3  10  -5   35.33    7.68
   3  10  -5   33.40    4.88
   3  10  -4  304.10   15.94
  -3  10   4  303.73   12.17
   3  10  -4  332.08   10.59
   3  10  -4  309.12   11.91
  -3  10   4  311.80   14.36
   3  10  -4  321.33   11.45
   3  10  -3   42.51    8.14
  -3  10   3   62.03    5.66
   3  10  -3   55.23    4.28
   3  10  -3   40.49    5.55
  -3  10   3   48.53    7.09
   3  10  -3   50.91    4.83
   3  10  -2  173.16   12.05
   3  10  -2  175.37    7.45
   3  10  -2  167.28    9.61
  -3  10   2  163.48    9.67
  -3  10   2  165.94    7.98
   3  10  -2  179.49    6.91
   3  10  -1   76.93    5.12
  -3  10   1   71.36    6.48
   3  10  -1   69.51    7.51
  -3  10   1   79.31    5.70
   3  10  -1   75.50    4.67
   3  10   0    5.28    3.30
  -3  10   0    2.80    3.55
   3  10   0    4.25    2.90
  -3  10   0    0.26    3.87
   3  10   1  544.84   20.97
  -3  10  -1  594.30   16.82
   3  10   1  564.41   15.58
  -3  10  -1  586.57   17.03
  -3  10  -2  167.12    8.56
   3  10   2  152.08   11.16
   3  10   3   80.09    6.83
  -3  10  -3   75.61    8.26
   3  10   3   88.55    8.85
   3  10   4   48.83    6.86
  -3  10  -4   48.66    7.18
   3  10   4   43.75    7.71
   3  10   5  180.72   11.19
  -3  10  -5  175.98   11.01
   3  10   5  169.83   11.49
   3  10   6   22.76    7.20
  -3  10  -6   28.17    9.72
  -3  10  -6   30.90    6.85
   3  10   6   20.74    6.93
  -3  10  -7    3.54    9.33
  -3  10  -7   19.80    6.24
   3  10   7   16.32    6.58
  -3  10  -8   63.46   12.48
   3  10   8   78.37    8.38
   3  11 -10   -1.83   10.10
   3  11 -10    8.61    8.18
   3  11  -9   19.11   10.68
   3  11  -9   48.21    9.42
   3  11  -8  265.21   18.20
   3  11  -8  265.28   16.01
   3  11  -7   42.14    9.82
   3  11  -7   56.06    9.44
   3  11  -6    6.99    8.17
   3  11  -6   12.77    7.18
   3  11  -6   13.77    5.06
   3  11  -5   46.10    8.79
   3  11  -5   68.28    6.28
   3  11  -4   61.08    4.93
   3  11  -4   68.45    9.64
   3  11  -4   68.62    6.10
   3  11  -3   51.86    4.40
   3  11  -3   47.61    8.35
   3  11  -3   54.30    5.28
   3  11  -2   21.58    7.25
   3  11  -2   13.08    3.70
  -3  11   2   16.63    5.89
   3  11  -2   16.45    5.77
   3  11  -2   19.51    3.40
   3  11  -1   11.17    3.77
  -3  11   1   21.75    5.68
   3  11  -1   13.66    3.29
   3  11   0   16.24    4.20
   3  11   0   16.34    3.62
  -3  11   0   11.02    4.85
   3  11   1  116.47   10.54
   3  11   1   91.54    6.00
  -3  11  -2   60.68    8.37
   3  11   2   50.94    8.48
   3  11   2   57.91    5.65
  -3  11  -3   10.78    6.27
   3  11   3    4.69    6.54
   3  11   3   11.95    5.13
  -3  11  -4  261.01   13.83
   3  11   4  243.08   14.08
   3  11   4  264.18   12.45
  -3  11  -5   75.81    8.83
   3  11   5   77.69    9.32
   3  11   5   73.38    8.70
  -3  11  -6   97.78    9.39
   3  11   6   87.15    9.90
  -3  11  -6   91.64   12.47
   3  11   7   71.92    9.10
   3  12  -9   30.33    9.77
   3  12  -9   22.66   11.53
   3  12  -8   54.20   10.35
   3  12  -8   44.16   10.97
   3  12  -7  120.76   12.10
   3  12  -7  122.64   13.35
   3  12  -6   19.61    8.68
   3  12  -6   28.31    9.39
   3  12  -5   24.12    5.08
   3  12  -5   29.09    8.48
   3  12  -4   54.83    6.10
   3  12  -4   53.40    5.00
   3  12  -4   39.64    9.07
   3  12  -3  241.81   10.03
   3  12  -3  245.86    9.20
   3  12  -3  220.76   14.86
   3  12  -2   70.85    5.82
   3  12  -2   80.86    5.40
   3  12  -2   72.43    9.60
   3  12  -1   19.68    4.26
   3  12  -1   12.83    3.57
   3  12   0   34.07    5.07
   3  12   0   19.77    8.23
   3  12   0   33.16    4.51
   3  12   1    6.50    7.33
  -3  12  -1   15.55    7.02
   3  12   1   16.82    4.34
  -3  12  -2   14.28    7.47
   3  12   2    6.40    7.47
   3  12   2    6.07    4.44
   3  12   3   25.74    8.05
  -3  12  -3   35.20    7.97
   3  12   3   37.30    6.18
  -3  12  -4   21.33    7.12
   3  12   4   19.14    7.97
   3  12   4   13.52    6.15
  -3  12  -5    8.42    6.90
   3  12   5    8.29    7.35
   3  12   6  139.95   11.88
  -3  12  -6  153.23   11.82
  -3  12  -6  115.74   14.63
   3  13  -7   24.63    9.13
   3  13  -7   30.27   10.08
   3  13  -6    2.80    8.26
   3  13  -6    3.95    8.99
   3  13  -5   86.09   11.43
   3  13  -4   15.08    4.80
   3  13  -4   18.60    9.24
   3  13  -3  116.68    7.47
   3  13  -3  132.89   12.76
   3  13  -2   28.86    4.98
   3  13  -2   31.04    4.32
   3  13  -2   39.57    9.38
   3  13  -1   55.47    5.88
   3  13  -1   63.66    5.41
   3  13   0   65.28    6.10
   3  13   0   51.45    9.75
   3  13   0   51.74    5.33
   3  13   1   25.08    8.68
  -3  13  -1   23.75    8.36
   3  13   1   21.21    4.91
   3  13   2   84.96   10.71
  -3  13  -2   85.98   10.69
   3  13   3   27.49    8.92
  -3  13  -3   35.41    8.72
   3  13   4   31.97    9.25
  -3  13  -4   39.13    8.95
   3  13   5   -2.41    7.70
  -3  13  -5   -1.15    7.69
   3  14  -6   13.41    9.17
   3  14  -6    5.85    9.39
   3  14  -5   19.27    9.40
   3  14  -4   30.26    9.86
   3  14  -3    5.13    9.02
   3  14  -3   16.03    5.00
   3  14  -2   10.87    8.69
   3  14  -2   19.34    5.21
  -3  14   1   32.44    9.67
   3  14  -1   26.85    5.63
  -3  14   0  119.16   12.40
   3  14   0  135.24   13.36
   3  14   0  126.34    8.59
   3  14   1  124.32   12.85
  -3  14  -1  111.78   12.13
   3  14   2   37.03    9.35
  -3  14  -2   36.00    9.17
   3  14   3   69.61   10.89
  -3  14  -3   54.60    9.90
  -3  15   2   52.24   11.26
  -3  15   1   28.44   10.01
   3  15   0   30.26   10.35
  -3  15   0   18.04    9.47
   4 -14  -5   49.84    7.00
  -4 -14   5   48.96    7.80
   4 -14  -5   43.27    7.56
   4 -14  -5   56.66    8.41
  -4 -14   5   63.80   10.20
  -4 -14   5   53.99    9.91
   4 -14  -4    2.33    6.33
  -4 -14   4    1.30    7.67
   4 -14  -4    6.04    6.85
  -4 -14   4    5.77    5.99
   4 -14  -4    5.38    5.39
  -4 -14   4    8.46    8.22
  -4 -14   3   48.84    9.56
   4 -14  -3   59.64    8.34
   4 -14  -3   63.12    9.02
  -4 -14   3   51.39    7.44
  -4 -14   3   51.60   10.57
  -4 -14   2   26.29    5.95
   4 -14  -2   33.19    6.52
  -4 -14   2   50.47   10.95
   4 -14  -2   30.83    7.70
   4 -14  -2   36.24    7.90
  -4 -14   2   26.51    8.10
   4 -14  -1   15.31    7.90
  -4 -14   1   22.91    7.64
   4 -14  -1   20.72    7.02
  -4 -14   1   17.89    5.88
   4 -14  -1   25.58    6.52
   4 -14   0  166.54   12.52
  -4 -14   0  184.56   13.22
   4 -14   0  172.09   13.16
   4 -14   0  179.01   11.61
  -4 -14   0  194.84   11.15
   4 -14   1   50.76    7.62
  -4 -14  -1   44.13    7.00
   4 -14   1   70.54   10.04
   4 -14   1   71.65   10.23
  -4 -14  -1   58.99   12.66
   4 -14   2  176.75   13.91
   4 -14   2  213.37   15.10
  -4 -14  -2  175.65   10.70
   4 -13  -7   32.56    6.12
   4 -13  -7   30.56    7.66
  -4 -13   7   24.08    7.35
  -4 -13   7   27.38    7.27
  -4 -13   7   26.05    9.61
   4 -13  -7   20.81    5.30
  -4 -13   6   66.92    8.46
   4 -13  -6   82.09    7.43
  -4 -13   6   82.46    8.62
   4 -13  -6   84.35    9.26
  -4 -13   6   76.63   11.00
  -4 -13   6   77.29   10.03
   4 -13  -5  105.00    8.18
  -4 -13   5  100.77    9.22
  -4 -13   5  113.08    9.11
   4 -13  -5   90.49    9.42
  -4 -13   5   90.89   10.86
  -4 -13   5  113.39   11.67
  -4 -13   4    7.86    7.74
  -4 -13   4   13.66    5.18
   4 -13  -4    8.51    5.91
   4 -13  -4   12.79    6.37
   4 -13  -4   12.08    5.32
  -4 -13   4   14.17    6.06
  -4 -13   4   14.56    8.69
  -4 -13   3   85.79   10.16
  -4 -13   3   85.90    7.44
   4 -13  -3   88.61    8.91
   4 -13  -3   86.83    9.45
   4 -13  -3   83.74    7.87
  -4 -13   3   95.91    8.46
  -4 -13   3   99.08   12.18
  -4 -13   2   11.12    7.23
  -4 -13   2    8.36    4.66
   4 -13  -2    8.60    6.00
   4 -13  -2   14.35    6.72
  -4 -13   2   10.03    5.55
   4 -13  -2   11.27    5.07
  -4 -13   2   -0.84    8.62
   4 -13  -1   10.86    6.48
   4 -13  -1    8.10    5.23
  -4 -13   1   10.50    5.31
   4 -13  -1    6.58    6.52
  -4 -13   1    1.62    6.29
  -4 -13   0   91.88    7.70
   4 -13   0   83.12    8.52
   4 -13   0   69.16    9.09
  -4 -13   0   76.94   13.08
   4 -13   0   86.45    9.81
  -4 -13  -1   13.75    5.20
   4 -13   1   14.93    5.97
   4 -13   1   20.09    7.79
   4 -13   1    5.39    6.71
  -4 -13  -1    1.86    9.69
   4 -13   2   63.19    5.23
  -4 -13  -2   58.77    7.01
   4 -13   2   76.27   10.30
   4 -13   3   52.61    9.54
  -4 -13  -3   48.17    6.69
   4 -13   3   37.36    9.03
   4 -13   4   51.72    9.59
   4 -13   4   64.31   10.36
  -4 -13  -4   59.78    7.44
   4 -12  -9   89.40    9.72
  -4 -12   9   79.10    8.43
  -4 -12   9   79.80   11.95
   4 -12  -9   83.15    7.56
   4 -12  -8   33.98    6.09
   4 -12  -8   35.06    7.45
  -4 -12   8   32.50    7.23
  -4 -12   8   43.77    7.69
  -4 -12   8   52.59   10.54
   4 -12  -8   46.66    6.41
   4 -12  -7   12.00    4.97
   4 -12  -7    7.21    6.14
  -4 -12   7   10.34    6.68
  -4 -12   7   16.15    6.51
  -4 -12   7   14.94    8.25
   4 -12  -7   10.99    4.98
  -4 -12   6    0.90    5.77
   4 -12  -6    9.42    4.95
  -4 -12   6   20.56    5.89
   4 -12  -6   32.08    6.96
  -4 -12   6   19.52    8.13
  -4 -12   6   16.50    7.28
   4 -12  -6   16.22    5.09
   4 -12  -5  127.97   10.16
   4 -12  -5  134.32    8.46
  -4 -12   5  111.76    9.25
  -4 -12   5  130.10   12.03
  -4 -12   5  149.69   11.98
  -4 -12   5  133.50    9.16
   4 -12  -4  158.96   10.95
   4 -12  -4  170.58    9.32
  -4 -12   4  148.64    9.95
  -4 -12   4  125.99   12.37
  -4 -12   4  157.08   12.00
   4 -12  -4  144.14    9.85
  -4 -12   4  168.05    9.53
   4 -12  -3   -7.20    6.36
   4 -12  -3    1.76    4.61
  -4 -12   3    1.90    4.79
  -4 -12   3    0.74    8.24
   4 -12  -3    1.96    5.23
  -4 -12   3    3.05    4.31
  -4 -12   3    3.69    6.73
   4 -12  -2   66.92    7.63
  -4 -12   2   75.72    6.60
  -4 -12   2   77.86    8.85
  -4 -12   2   49.49    6.24
   4 -12  -2   58.21    6.50
   4 -12  -2   58.49    8.01
  -4 -12   1   88.53    6.41
   4 -12  -1   86.83    8.43
   4 -12  -1   98.47    9.35
  -4 -12   1   97.75    9.23
   4 -12  -1   96.29    7.82
  -4 -12   1   83.08    7.46
  -4 -12   0   89.95    7.18
   4 -12   0   98.10    8.39
  -4 -12   0   87.80    6.13
   4 -12   0   74.06    9.12
   4 -12   0   78.92    5.80
   4 -12   0   89.81    8.89
  -4 -12   0   65.86   12.08
   4 -12   1   50.25    8.59
  -4 -12  -1   51.70    4.95
   4 -12   1   50.88    4.90
  -4 -12  -1   59.03    6.72
   4 -12   1   52.55    7.41
   4 -12   1   58.55    8.45
   4 -12   2   36.97    8.57
   4 -12   2   25.70    7.49
  -4 -12  -2   26.40    5.34
   4 -12   3   21.75    7.92
   4 -12   3   34.36    3.72
   4 -12   3   29.26    8.17
  -4 -12  -3   32.45    6.04
   4 -12   4  145.96   12.59
   4 -12   4  125.64    5.74
   4 -12   4  120.25   12.04
  -4 -12  -4  133.31    9.47
  -4 -12  -5    1.30    5.22
   4 -12   5    2.67    7.39
   4 -12   5   -6.79    9.03
   4 -12   5   -0.25    4.10
   4 -11 -10  100.22    8.50
  -4 -11  10  101.35    8.24
   4 -11 -10  111.93   10.16
  -4 -11  10   86.78   12.66
   4 -11 -10   90.59    7.79
   4 -11  -9   82.14    7.57
  -4 -11   9   84.16    8.09
   4 -11  -9   83.74    9.15
  -4 -11   9   70.65   11.46
   4 -11  -9   81.84    7.24
   4 -11  -8   14.59    4.81
   4 -11  -8   14.59    6.16
  -4 -11   8   13.94    5.95
  -4 -11   8    8.24    8.14
   4 -11  -8   11.78    4.79
   4 -11  -7   25.08    4.89
   4 -11  -7   23.13    6.59
  -4 -11   7   26.48    6.77
  -4 -11   7   39.83    7.18
  -4 -11   7   43.97    9.30
   4 -11  -7   26.73    5.24
   4 -11  -6   87.13    7.08
  -4 -11   6   73.62    7.70
  -4 -11   6  108.87    8.40
   4 -11  -6   78.06    8.16
  -4 -11   6   84.22   10.03
   4 -11  -6   92.41    7.68
   4 -11  -6   91.97    7.22
  -4 -11   6  109.73   10.04
  -4 -11   5  190.03   10.85
   4 -11  -5  183.19    9.31
  -4 -11   5  206.05   10.48
  -4 -11   5  189.06   12.70
   4 -11  -5  175.24   11.03
   4 -11  -5  172.33    9.29
  -4 -11   5  191.08   13.18
   4 -11  -4   37.42    6.67
  -4 -11   4   40.86    6.06
   4 -11  -4   23.04    4.70
  -4 -11   4   29.48    7.70
  -4 -11   4   37.31    7.56
  -4 -11   4   32.11    5.52
   4 -11  -3   14.17    5.97
  -4 -11   3   25.73    4.89
  -4 -11   3   13.97    6.61
   4 -11  -3   17.09    5.20
   4 -11  -3   21.76    4.83
  -4 -11   3   17.89    4.79
  -4 -11   3   27.62    8.36
  -4 -11   2   74.08    5.96
   4 -11  -2   76.35    7.44
  -4 -11   2   99.35    8.88
   4 -11  -2   84.36    6.07
  -4 -11   2   72.75    6.76
   4 -11  -2   78.75    6.72
   4 -11  -2   95.54    8.87
  -4 -11   1   11.47    3.97
  -4 -11   1   16.16    6.19
   4 -11  -1   22.27    6.05
   4 -11  -1   20.60    6.12
  -4 -11   1   14.00    4.34
   4 -11  -1   11.91    4.99
   4 -11  -1   18.53    4.03
  -4 -11   0  137.57    6.85
   4 -11   0  137.99   10.69
   4 -11   0  131.74    9.67
   4 -11   0  118.10    6.59
  -4 -11   0  141.90    8.37
   4 -11   0  130.43    8.80
  -4 -11   0  146.59   14.29
   4 -11   1    2.77    2.99
   4 -11   1    1.81    5.62
  -4 -11  -1    0.32    4.36
   4 -11   1   10.68    4.95
   4 -11   1    7.17    5.96
  -4 -11  -1    9.81    3.53
   4 -11   2    1.98    2.88
  -4 -11  -2    0.90    3.19
   4 -11   2   -0.54    6.08
   4 -11   2    0.99    6.06
  -4 -11  -2    3.69    4.39
  -4 -11  -3   22.87    3.80
   4 -11   3   13.60    6.73
   4 -11   3   23.93    3.33
   4 -11   3   17.49    7.21
  -4 -11  -3   13.28    5.25
   4 -11   4   23.38    8.15
   4 -11   4   34.62    3.30
   4 -11   4   35.09    8.22
  -4 -11  -4   32.77    6.17
  -4 -11  -5   38.50    6.90
   4 -11   5   65.92    9.73
   4 -11   5   51.60    3.18
   4 -11   5   60.86    9.63
  -4 -11  -5   46.99    4.77
   4 -11   5   44.04    4.67
  -4 -11  -6   36.97    7.33
   4 -11   6   22.72    8.36
   4 -11   6   37.16   10.06
  -4 -11  -6   33.25    4.53
  -4 -10  11    2.60    4.37
   4 -10 -11   13.69    7.10
  -4 -10  11   -1.63    9.50
   4 -10 -11    8.99    5.66
   4 -10 -10   22.85    6.03
  -4 -10  10   23.63    5.28
   4 -10 -10   29.32    7.65
  -4 -10  10   28.02   10.05
   4 -10 -10   25.10    5.47
   4 -10  -9   62.96    6.63
  -4 -10   9   77.15    7.55
   4 -10  -9   63.37    7.98
  -4 -10   9   63.36   10.32
   4 -10  -9   54.02    6.32
   4 -10  -8   36.74    5.53
   4 -10  -8   33.40    6.42
  -4 -10   8   39.62    6.58
  -4 -10   8   25.87    8.50
   4 -10  -8   24.93    6.65
   4 -10  -8   34.39    5.29
   4 -10  -7   45.20    5.59
   4 -10  -7   48.33    6.95
  -4 -10   7   51.12    7.60
  -4 -10   7   47.56    6.92
   4 -10  -7   47.30    6.63
  -4 -10   7   42.74    8.46
   4 -10  -7   44.77    5.63
  -4 -10   6  244.21   12.16
   4 -10  -6  251.89   10.63
  -4 -10   6  263.18   12.07
  -4 -10   6  265.99   14.57
   4 -10  -6  224.91   12.10
   4 -10  -6  250.41   11.37
  -4 -10   6  258.26   13.96
   4 -10  -6  259.20   11.07
   4 -10  -5  254.19   10.53
  -4 -10   5  259.77   11.97
   4 -10  -5  245.99   12.40
  -4 -10   5  246.90   11.27
  -4 -10   5  256.55   14.05
   4 -10  -5  242.92   10.44
   4 -10  -5  247.28   10.78
  -4 -10   5  253.54   14.41
   4 -10  -4   29.84    6.28
   4 -10  -4   37.60    4.70
  -4 -10   4   42.08    5.38
  -4 -10   4   33.53    7.24
   4 -10  -4   31.78    4.80
  -4 -10   4   33.83    5.37
  -4 -10   4   43.61    8.36
  -4 -10   3   10.61    4.04
  -4 -10   3   19.66    6.21
   4 -10  -3    9.22    4.58
   4 -10  -3    5.79    3.70
  -4 -10   3   10.19    4.13
   4 -10  -3   11.23    4.04
   4 -10  -3    9.66    5.58
   4 -10  -2  194.62    9.96
  -4 -10   2  203.26   11.28
  -4 -10   2  194.54    8.38
   4 -10  -2  181.26    8.27
  -4 -10   2  187.18    9.38
   4 -10  -2  186.93    9.23
   4 -10  -2  202.97   11.23
   4 -10  -1  174.18   10.79
   4 -10  -1  170.29    7.60
   4 -10  -1  151.43    9.45
  -4 -10   1  176.33    7.46
  -4 -10   1  155.30    8.50
   4 -10  -1  156.60    8.83
  -4 -10   1  175.59   13.92
  -4 -10   0  177.01    7.17
   4 -10   0  163.15   11.02
   4 -10   0  166.58    7.40
   4 -10   0  169.66   10.17
  -4 -10   0  179.31    8.90
   4 -10   0  166.74    9.51
  -4 -10   0  176.96   14.64
   4 -10   1  475.87   18.16
   4 -10   1  524.29   14.15
   4 -10   1  486.38   19.05
  -4 -10  -1  503.40   13.50
   4 -10   1  501.80   17.39
  -4 -10  -1  503.80   16.26
   4 -10   2  182.64   11.48
   4 -10   2  182.76    7.08
  -4 -10  -2  176.27    6.92
   4 -10   2  181.73   11.89
  -4 -10  -2  177.96    9.46
   4 -10   3  130.67   10.66
   4 -10   3  117.16   10.60
   4 -10   3  124.58    5.49
  -4 -10  -3  115.76    5.68
  -4 -10  -3  126.07    8.22
  -4 -10  -4   23.89    5.96
  -4 -10  -4   15.87    3.45
   4 -10   4   20.43    2.67
   4 -10   4   24.25    7.38
   4 -10   4   21.75    7.69
  -4 -10  -4   20.06    3.63
  -4 -10  -5    5.63    5.73
  -4 -10  -5    6.42    3.24
   4 -10   5    2.40    6.81
   4 -10   5    1.81    1.82
   4 -10   5    1.23    7.61
   4 -10   5   -0.30    2.78
  -4 -10  -5    4.94    3.18
  -4 -10  -6   11.73    6.38
   4 -10   6   27.41    9.07
  -4 -10  -6   21.42    4.10
   4 -10   6    7.61    7.31
  -4 -10  -7   26.63    7.73
   4 -10   7   42.61   10.26
  -4 -10  -7   37.77    4.83
   4  -9 -11   16.69    6.21
  -4  -9  11   17.94    4.55
   4  -9 -11   22.12    7.34
  -4  -9  11   18.78    9.54
   4  -9 -11   16.31    5.34
   4  -9 -10   66.00    7.18
  -4  -9  10   76.14    6.79
   4  -9 -10   54.41    8.02
  -4  -9  10   63.47   10.77
   4  -9 -10   63.96    6.60
   4  -9  -9   27.95    5.50
  -4  -9   9   24.03    5.50
   4  -9  -9   27.89    6.66
  -4  -9   9   29.36    9.01
   4  -9  -9   20.01    6.53
   4  -9  -9   36.76    5.51
   4  -9  -8   34.55    5.28
   4  -9  -8   35.05    6.37
  -4  -9   8   34.18    6.14
  -4  -9   8   28.56    8.48
   4  -9  -8   26.67    6.61
   4  -9  -8   26.34    4.89
   4  -9  -7  145.60    8.17
   4  -9  -7  162.41   10.36
  -4  -9   7  165.73   12.14
   4  -9  -7  156.87    9.39
  -4  -9   7  135.60    9.84
   4  -9  -7  159.97    8.55
   4  -9  -6   71.51    6.51
   4  -9  -6   81.53    6.09
   4  -9  -6   83.32    7.84
  -4  -9   6   81.45    8.35
  -4  -9   6   66.69    6.62
  -4  -9   6   75.64    9.11
   4  -9  -6   89.39    6.52
  -4  -9   5  100.03    7.47
   4  -9  -5   85.36    6.05
   4  -9  -5   94.66    7.81
  -4  -9   5   98.84    7.07
   4  -9  -5   86.03    6.23
  -4  -9   5   88.07    8.67
   4  -9  -5   95.68    6.57
  -4  -9   5   85.82    8.72
  -4  -9   4   17.82    6.59
   4  -9  -4   11.69    5.20
   4  -9  -4   17.93    4.09
  -4  -9   4   13.22    4.34
  -4  -9   4   16.48    5.92
  -4  -9   4   18.32    6.88
   4  -9  -4   12.48    4.14
   4  -9  -4   13.52    3.83
  -4  -9   4   12.51    4.20
   4  -9  -3  169.18    9.91
   4  -9  -3  172.42    7.89
   4  -9  -3  179.75    8.84
  -4  -9   3  189.14    8.31
  -4  -9   3  195.98   10.96
  -4  -9   3  190.46   11.58
   4  -9  -3  179.19    8.34
  -4  -9   3  200.06    9.10
  -4  -9   2   86.04    7.94
  -4  -9   2   91.04    5.66
   4  -9  -2   99.70    6.98
   4  -9  -2   90.11    5.65
  -4  -9   2   89.27    6.25
   4  -9  -2   72.75    5.94
   4  -9  -2   77.82    7.50
   4  -9  -1    5.06    4.84
   4  -9  -1   12.84    3.29
   4  -9  -1    7.52    4.61
  -4  -9   1   12.83    3.18
  -4  -9   1    7.32    3.64
   4  -9  -1    8.11    3.69
  -4  -9   1    9.97    7.26
   4  -9   0 1014.45   29.37
  -4  -9   0 1044.54   23.50
   4  -9   0 1050.32   24.48
   4  -9   0 1027.95   27.81
   4  -9   0 1080.83   27.53
  -4  -9   0 1081.58   26.44
  -4  -9   0 1017.93   34.41
   4  -9   1  468.69   16.94
   4  -9   1  470.71   12.75
  -4  -9  -1  458.52   11.94
   4  -9   1  480.06   17.84
   4  -9   1  439.40   15.73
  -4  -9  -1  415.10   14.42
  -4  -9  -2  103.78    4.94
   4  -9   2  111.27    9.43
   4  -9   2  109.16    5.17
   4  -9   2  102.86    8.82
  -4  -9  -2   91.87    7.03
  -4  -9  -2  103.58    7.27
  -4  -9  -3  138.02    8.62
   4  -9   3  130.00   10.40
  -4  -9  -3  136.06    5.62
   4  -9   3  134.96    5.43
   4  -9   3  140.60   10.58
  -4  -9  -3  137.03    6.09
  -4  -9  -4   74.68    7.61
  -4  -9  -4   67.98    4.45
   4  -9   4   74.22    3.68
   4  -9   4   69.66    9.04
   4  -9   4   84.84    9.28
  -4  -9  -4   68.63    4.62
  -4  -9  -5   11.08    5.93
   4  -9   5   13.04    1.60
   4  -9   5   12.82    7.13
   4  -9   5    9.49    2.13
  -4  -9  -5   11.22    3.31
  -4  -9  -5   17.05    3.49
  -4  -9  -6    6.65    6.42
   4  -9   6    3.19    7.88
  -4  -9  -6    6.88    3.45
  -4  -9  -6   13.39    3.71
  -4  -9  -7   62.53    9.29
  -4  -9  -7   45.76    4.84
   4  -9   7   38.75   10.05
  -4  -9  -8   35.75    9.42
   4  -9   8   41.83   10.19
  -4  -9  -8   41.94    5.19
   4  -8 -12   -0.49    6.42
  -4  -8  12    8.50    3.87
   4  -8 -12    6.27    7.29
  -4  -8  12   -5.61   10.19
   4  -8 -12    4.20    4.85
   4  -8 -11   11.66    6.49
  -4  -8  11    9.95    4.25
   4  -8 -11   -1.06    6.23
  -4  -8  11   15.64    8.89
   4  -8 -11   10.38    4.77
   4  -8 -10   17.03    5.90
  -4  -8  10   21.48    4.90
   4  -8 -10   15.70    6.32
  -4  -8  10   14.41    8.34
   4  -8 -10   13.28    4.73
   4  -8  -9   22.83    5.48
  -4  -8   9   21.30    5.24
   4  -8  -9   21.67    6.37
  -4  -8   9    5.65    7.20
   4  -8  -9   22.79    6.65
   4  -8  -9   22.15    4.77
   4  -8  -8   76.40    6.55
   4  -8  -8   61.88    7.44
  -4  -8   8   72.65    7.11
   4  -8  -8   64.53    7.54
  -4  -8   8   60.70    9.40
   4  -8  -8   60.88    5.82
  -4  -8   7  138.05    9.11
   4  -8  -7  121.31    7.24
  -4  -8   7  129.31   10.06
   4  -8  -7  119.23    8.96
  -4  -8   7  141.29   11.06
   4  -8  -7  138.72    8.68
   4  -8  -7  118.52    7.27
   4  -8  -6  104.58    6.49
   4  -8  -6  109.41    8.20
   4  -8  -6  112.72    6.84
  -4  -8   6   98.45    7.33
  -4  -8   6  134.43   10.19
   4  -8  -6  123.62    7.50
  -4  -8   6  119.95    8.89
   4  -8  -6  114.26    6.86
   4  -8  -5  305.95   11.08
  -4  -8   5  299.35   14.22
  -4  -8   5  320.72   14.50
   4  -8  -5  300.25   12.63
  -4  -8   5  330.60   11.86
  -4  -8   5  286.09   13.50
   4  -8  -5  272.61   10.52
  -4  -8   5  303.35   12.03
   4  -8  -5  294.51   10.47
   4  -8  -4  323.31   11.49
  -4  -8   4  351.88   15.05
   4  -8  -4  310.33   13.12
   4  -8  -4  337.08   11.46
  -4  -8   4  361.14   11.88
  -4  -8   4  332.19   14.06
   4  -8  -4  327.53   10.89
   4  -8  -4  341.16   11.14
  -4  -8   4  340.52   12.28
   4  -8  -3  106.70    7.91
   4  -8  -3  138.97    6.83
   4  -8  -3  114.17    6.79
  -4  -8   3  131.51    8.77
  -4  -8   3  127.84    6.46
  -4  -8   3  103.17    8.79
   4  -8  -3  132.41    6.63
  -4  -8   3  126.05    6.98
  -4  -8   2  196.61   10.90
   4  -8  -2  169.67    9.28
   4  -8  -2  181.72    7.50
  -4  -8   2  170.68    9.48
  -4  -8   2  177.32    7.00
   4  -8  -2  161.23    8.11
  -4  -8   2  165.99    7.72
   4  -8  -2  178.26    7.89
  -4  -8   2  159.13   11.83
   4  -8  -1   51.63    6.18
   4  -8  -1   43.55    3.86
  -4  -8   1   43.37    3.55
   4  -8  -1   34.75    4.95
  -4  -8   1   43.58    4.36
   4  -8  -1   44.72    4.70
  -4  -8   1   49.31    8.65
  -4  -8   0  291.54    8.24
   4  -8   0  283.44   12.60
   4  -8   0  289.96    9.31
   4  -8   0  273.21   11.49
   4  -8   0  289.92   11.19
  -4  -8   0  291.08   10.47
  -4  -8   0  273.72   15.89
   4  -8   1  340.61   13.58
   4  -8   1  328.21   10.03
   4  -8   1  335.91   14.48
  -4  -8  -1  360.50    9.20
  -4  -8  -1  349.24   12.15
  -4  -8  -2  329.37   12.30
   4  -8   2  321.64   14.39
  -4  -8  -2  307.64    8.51
   4  -8   2  308.22    9.10
   4  -8   2  316.40   13.82
  -4  -8  -2  285.29   11.69
  -4  -8  -2  312.16    9.15
  -4  -8  -3  314.96   13.20
   4  -8   3  337.88    9.17
   4  -8   3  321.45   15.30
  -4  -8  -3  332.37    9.16
  -4  -8  -3  328.53   13.20
   4  -8   3  331.70   15.00
  -4  -8  -3  330.20    9.73
  -4  -8  -4   36.83    6.83
  -4  -8  -4   48.27    3.80
   4  -8   4   47.37    2.86
   4  -8   4   48.97    7.99
  -4  -8  -4   53.62    3.89
  -4  -8  -5   77.22    8.68
  -4  -8  -5   64.30    4.65
   4  -8   5   81.99    9.62
  -4  -8  -5   70.76    4.74
  -4  -8  -5   62.34    4.79
  -4  -8  -6  163.26    7.53
  -4  -8  -6  156.78    7.25
   4  -8   6  137.86   12.26
  -4  -8  -7   91.21    6.56
  -4  -8  -7   87.85    5.94
   4  -8   7   77.69   10.55
   4  -8   8    5.71    7.10
  -4  -8  -8   -3.08    3.82
   4  -8   8    4.31    8.19
   4  -8   9   81.48   10.92
   4  -8   9   81.87   11.77
  -4  -8  -9   87.14    6.79
  -4  -7  12   37.23    4.62
   4  -7 -12   24.61    5.92
  -4  -7  12   39.08   10.35
   4  -7 -12   20.90    8.04
  -4  -7  11  261.58   10.65
   4  -7 -11  262.23   12.00
  -4  -7  11  240.10   16.53
   4  -7 -11  272.48   15.01
   4  -7 -10   61.14    8.02
   4  -7 -10   66.85    7.91
  -4  -7  10   65.97    5.96
   4  -7 -10   63.98    8.34
  -4  -7  10   46.42    9.39
   4  -7 -10   65.35    6.57
   4  -7  -9   45.29    5.47
   4  -7  -9   44.12    7.13
  -4  -7   9   53.88    8.28
  -4  -7   9   41.15    5.51
  -4  -7   9   47.92    9.14
   4  -7  -9   44.98    7.34
   4  -7  -9   42.49    6.48
   4  -7  -8   30.44    5.03
  -4  -7   8   51.23    8.02
   4  -7  -8   37.96    6.80
  -4  -7   8   46.86    5.80
   4  -7  -8   35.03    6.27
  -4  -7   8   47.16    7.89
   4  -7  -8   35.23    5.62
   4  -7  -7   90.57    6.39
  -4  -7   7   99.99    7.59
  -4  -7   7  104.20    9.19
   4  -7  -7  105.01    8.31
   4  -7  -7  112.35    6.96
  -4  -7   7  112.02    9.97
   4  -7  -7  103.46    7.65
   4  -7  -7  100.01    6.85
   4  -7  -6   97.98    5.97
   4  -7  -6   93.68    7.61
   4  -7  -6  103.93    6.38
  -4  -7   6  103.69    8.76
   4  -7  -6  101.81    6.71
  -4  -7   6   99.90    7.88
   4  -7  -6  107.89    6.33
  -4  -7   5  798.25   23.77
  -4  -7   5  735.00   23.26
  -4  -7   5  779.49   23.23
   4  -7  -5  793.73   22.03
   4  -7  -5  756.10   19.79
  -4  -7   5  723.31   20.64
   4  -7  -5  755.13   19.22
  -4  -7   4  206.29   11.23
   4  -7  -4  213.12   10.11
  -4  -7   4  209.41   10.45
  -4  -7   4  192.18    8.13
   4  -7  -4  199.71    7.71
   4  -7  -4  209.01    7.88
  -4  -7   4  213.56    8.94
   4  -7  -3  277.52   11.53
   4  -7  -3  304.83    9.93
  -4  -7   3  294.22    9.37
  -4  -7   3  263.75   11.42
  -4  -7   3  282.91   12.73
   4  -7  -3  294.95    9.66
  -4  -7   3  279.99   10.00
  -4  -7   2  114.05    8.20
   4  -7  -2   92.37    6.74
   4  -7  -2  105.33    5.53
  -4  -7   2  106.55    7.05
  -4  -7   2   96.97    4.72
   4  -7  -2   94.58    5.74
  -4  -7   2  104.57    9.58
  -4  -7   2  103.30    5.66
   4  -7  -2  108.48    5.71
  -4  -7   1  572.61   18.20
   4  -7  -1  547.99   17.50
   4  -7  -1  544.99   15.78
  -4  -7   1  544.13   12.93
   4  -7  -1  547.10   15.51
  -4  -7   1  550.22   15.07
  -4  -7   1  530.01   21.04
   4  -7  -1  558.57   14.48
   4  -7   0    3.15    2.36
   4  -7   0    2.70    3.27
  -4  -7   0    0.62    2.92
  -4  -7   0    1.88    1.82
   4  -7   0    3.01    4.34
   4  -7   0    7.26    3.86
  -4  -7   0   -1.14    6.59
  -4  -7  -1  689.57   15.23
   4  -7   1  706.05   21.72
  -4  -7  -1  729.93   19.28
   4  -7   1  722.63   20.81
  -4  -7  -1  702.72   25.73
   4  -7   1  720.50   16.89
   4  -7   2  101.01    4.47
  -4  -7  -2   99.82    6.98
   4  -7   2  101.13    7.83
  -4  -7  -2   91.94    6.62
  -4  -7  -2   90.22    4.26
  -4  -7  -2  108.07    3.97
   4  -7   3   40.47    2.86
  -4  -7  -3   51.21    6.17
  -4  -7  -3   42.66    6.04
  -4  -7  -3   42.47    3.10
   4  -7   3   36.23    6.20
  -4  -7  -3   42.41    3.29
  -4  -7  -4  129.62    5.51
  -4  -7  -4  119.15    8.88
   4  -7   4  133.24   10.44
   4  -7   4  125.17    4.13
  -4  -7  -4  122.07    5.46
  -4  -7  -4  113.24    5.50
  -4  -7  -5  245.01    8.79
  -4  -7  -5  240.75    8.52
  -4  -7  -5  233.82    8.81
  -4  -7  -6   78.43    5.94
  -4  -7  -6   71.88    5.62
   4  -7   6   87.84   10.05
  -4  -7  -6   83.29    5.54
  -4  -7  -7  370.00   13.21
  -4  -7  -7  359.67   12.19
   4  -7   7  352.09   17.61
   4  -7   7  371.03   18.68
  -4  -7  -7  354.33   12.62
   4  -7   8  137.59   11.47
  -4  -7  -8  136.50    7.84
  -4  -7  -8  110.03    8.33
   4  -7   9   20.10    8.35
   4  -7   9   30.35    9.37
  -4  -7  -9   37.44    5.60
   4  -6 -13   58.54    9.88
  -4  -6  13   32.13   10.15
   4  -6 -13   39.17    6.99
  -4  -6  13   45.80    4.84
   4  -6 -12   12.49    7.35
  -4  -6  12   13.79    3.78
  -4  -6  12   13.18    9.16
   4  -6 -12   12.59    5.43
   4  -6 -11   88.49    7.72
  -4  -6  11   97.27    6.47
   4  -6 -11   85.44   10.29
  -4  -6  10   14.56    6.71
   4  -6 -10    9.94    6.44
  -4  -6  10   12.43    4.19
   4  -6 -10    3.62    6.52
  -4  -6  10   14.20    7.52
   4  -6 -10    4.25    4.46
   4  -6  -9   97.68    9.18
  -4  -6   9  100.33    7.03
   4  -6  -9  118.88    7.69
  -4  -6   9  119.49   11.06
   4  -6  -9  102.55    9.05
  -4  -6   9  118.19    9.83
  -4  -6   8  274.62   11.33
   4  -6  -8  263.80   13.20
  -4  -6   8  277.35   13.56
   4  -6  -8  268.42   10.68
   4  -6  -8  288.63   12.71
  -4  -6   8  283.15   14.46
   4  -6  -8  275.36   12.07
  -4  -6   7   80.85    6.68
  -4  -6   7   82.83    8.28
   4  -6  -7   72.79    7.09
   4  -6  -7   70.20    6.43
  -4  -6   7   81.96    8.37
   4  -6  -7   74.66    6.15
   4  -6  -7   67.93    5.66
   4  -6  -6    8.78    4.74
  -4  -6   6   11.24    4.82
   4  -6  -6    8.45    3.52
   4  -6  -6    8.19    3.87
  -4  -6   6    7.42    5.28
   4  -6  -6    7.98    3.24
  -4  -6   5  155.90    9.38
  -4  -6   5  152.03    9.65
   4  -6  -5  172.62    8.81
   4  -6  -5  163.17    7.37
  -4  -6   5  161.22    9.20
   4  -6  -5  161.98    7.30
  -4  -6   5  160.04    7.65
   4  -6  -5  165.78    6.73
  -4  -6   4 1921.94   44.41
   4  -6  -4 1901.32   42.49
  -4  -6   4 1878.78   42.94
   4  -6  -4 1847.57   39.38
  -4  -6   4 1802.31   40.48
   4  -6  -4 1860.34   39.26
  -4  -6   3  125.49    8.43
   4  -6  -3  108.65    7.01
   4  -6  -3  118.41    5.86
  -4  -6   3  126.98    7.35
  -4  -6   3  121.54    8.78
   4  -6  -3  126.95    5.58
  -4  -6   3  123.13    5.92
  -4  -6   2  424.48   15.24
   4  -6  -2  408.28   13.87
   4  -6  -2  434.63   12.22
  -4  -6   2  445.67   10.74
   4  -6  -2  429.67   12.18
  -4  -6   2  462.97   17.34
  -4  -6   2  433.15   12.21
   4  -6  -2  433.73   12.22
  -4  -6   1  406.12   14.36
   4  -6  -1  413.89   13.94
  -4  -6   1  408.12    9.22
   4  -6  -1  393.49   12.11
   4  -6  -1  395.76   11.24
  -4  -6   1  419.39   17.16
   4  -6  -1  389.83   11.93
  -4  -6   1  412.04   11.69
  -4  -6   0  236.03   10.44
   4  -6   0  215.06    8.60
  -4  -6   0  238.16    8.39
   4  -6   0  199.79    8.71
  -4  -6   0  230.42   12.86
   4  -6   0  208.14    7.18
   4  -6   1  855.00   18.92
  -4  -6  -1  799.61   16.62
  -4  -6  -1  903.69   21.61
   4  -6   1  862.02   22.57
  -4  -6  -1  820.18   21.29
  -4  -6  -1  800.64   27.02
   4  -6   2   69.52    3.59
  -4  -6  -2   66.31    2.86
  -4  -6  -2   67.54    5.68
  -4  -6  -2   67.62    6.11
  -4  -6  -2   66.69    3.14
   4  -6   2   75.48    6.70
  -4  -6  -2   68.08    3.35
   4  -6   3   44.42    2.73
  -4  -6  -3   40.18    5.61
  -4  -6  -3   46.65    3.06
   4  -6   3   40.65    6.40
  -4  -6  -3   41.04    3.06
  -4  -6  -3   37.20    3.11
  -4  -6  -4  200.85    7.09
  -4  -6  -4  187.85    7.03
  -4  -6  -4  191.32   10.48
   4  -6   4  186.24   11.46
   4  -6   4  168.61    4.58
  -4  -6  -4  189.48    6.79
  -4  -6  -5  201.55    8.04
  -4  -6  -5  201.77    7.82
  -4  -6  -5  186.93   11.76
   4  -6   5  211.89   12.71
  -4  -6  -5  202.00    8.41
  -4  -6  -6  227.19    9.29
   4  -6   6  242.80   13.40
  -4  -6  -6  231.67    9.15
   4  -6   6  224.77   13.90
  -4  -6  -6  215.70    9.66
  -4  -6  -7  142.16    8.08
   4  -6   7  154.54   11.67
  -4  -6  -7  155.40    7.97
   4  -6   7  152.65   12.62
  -4  -6  -7  149.12    7.51
  -4  -6  -8   39.65    4.83
   4  -6   8   48.16    8.48
  -4  -6  -8   32.66    5.36
   4  -6   8   30.31    8.59
   4  -6   9   -7.11    7.09
  -4  -6  -9    0.33    4.49
   4  -6   9   -7.87    7.91
   4  -6  10   91.67   10.87
   4  -6  10   68.48   11.98
  -4  -6 -10   80.40    7.59
  -4  -5  13   17.62    3.95
   4  -5 -13   18.38    5.96
  -4  -5  13   25.41    9.92
   4  -5 -13   19.49    8.24
  -4  -5  12   21.53    4.20
   4  -5 -12   32.98    6.50
  -4  -5  12   30.03    8.89
   4  -5 -12    7.85    7.45
  -4  -5  11   18.31    3.91
  -4  -5  11   26.50    7.11
   4  -5 -11   18.60    6.74
  -4  -5  11   30.81    8.86
   4  -5 -11   26.08    7.66
  -4  -5  10  214.13    9.17
  -4  -5  10  194.30   11.94
  -4  -5  10  190.15   13.44
   4  -5 -10  201.54   12.01
   4  -5 -10  217.59   13.19
  -4  -5   9  150.02    7.90
   4  -5  -9  136.25    7.71
  -4  -5   9  146.20   10.19
  -4  -5   9  150.70   11.59
   4  -5  -9  137.43    9.73
   4  -5  -9  160.13   10.80
   4  -5  -8  344.45   12.20
  -4  -5   8  357.47   15.01
   4  -5  -8  351.67   13.79
  -4  -5   8  342.24   15.74
   4  -5  -8  322.84   14.49
  -4  -5   7   67.88    5.86
  -4  -5   7   64.71    7.48
   4  -5  -7   74.33    7.22
   4  -5  -7   70.88    5.34
   4  -5  -7   79.37    6.50
  -4  -5   7   68.84    7.52
   4  -5  -7   64.52    5.91
   4  -5  -6  162.25    7.31
   4  -5  -6  156.61    8.84
   4  -5  -6  180.39    7.81
  -4  -5   6  163.71    9.56
   4  -5  -6  164.22    7.96
  -4  -5   6  173.12    8.70
  -4  -5   5 1775.29   42.72
   4  -5  -5 1808.86   41.23
   4  -5  -5 1810.83   39.33
  -4  -5   5 1761.84   41.62
   4  -5  -5 1806.22   39.04
   4  -5  -5 1797.07   38.06
   4  -5  -4  283.13   10.71
  -4  -5   4  279.61   12.04
  -4  -5   4  294.09   11.05
   4  -5  -4  273.36    8.59
  -4  -5   4  267.14    9.22
   4  -5  -4  270.53    8.24
  -4  -5   3   69.36    6.71
   4  -5  -3   85.12    5.82
  -4  -5   3   94.66    6.02
  -4  -5   3   81.13    6.79
   4  -5  -3   79.51    4.07
  -4  -5   3   76.98    4.49
  -4  -5   2  207.84    9.84
   4  -5  -2  187.70    8.47
   4  -5  -2  189.86    6.55
  -4  -5   2  185.82    6.66
   4  -5  -2  186.38    6.63
  -4  -5   2  199.77   10.51
   4  -5  -2  193.82    7.13
  -4  -5   1    6.97    4.96
   4  -5  -1    4.55    2.14
  -4  -5   1    6.22    3.98
   4  -5  -1    5.26    2.68
  -4  -5   1    3.80    2.32
   4  -5  -1    3.70    2.37
   4  -5   0  395.62   10.75
  -4  -5   0  404.58   13.48
   4  -5   0  403.95   12.26
  -4  -5   0  410.39   11.70
  -4  -5   0  387.93   16.03
  -4  -5  -1  749.30   23.91
  -4  -5  -1  680.42   14.88
  -4  -5  -1  679.81   19.09
  -4  -5  -1  721.15   18.91
  -4  -5  -1  695.84   18.39
   4  -5   1  715.02   19.24
   4  -5   1  702.06   16.24
  -4  -5  -2  262.56    7.12
  -4  -5  -2  269.59   13.72
  -4  -5  -2  273.84    6.55
  -4  -5  -2  260.87    6.91
   4  -5   2  259.87   11.11
  -4  -5  -2  272.17   10.60
   4  -5   2  261.84    7.55
  -4  -5  -3  132.84    5.23
  -4  -5  -3  146.76    5.43
   4  -5   3  138.17    4.65
  -4  -5  -3  138.14    5.20
  -4  -5  -3  139.04    8.44
   4  -5   3  134.23    8.86
  -4  -5  -4 1101.65   24.88
   4  -5   4 1037.98   29.72
  -4  -5  -4 1119.72   24.82
   4  -5   4 1098.89   30.50
  -4  -5  -4 1056.23   29.69
   4  -5   5 1256.15   34.09
  -4  -5  -5 1260.88   28.98
  -4  -5  -5 1276.13   28.97
  -4  -5  -5 1207.66   34.21
   4  -5   5 1240.53   34.70
   4  -5   6   85.42    8.57
  -4  -5  -6   80.64    5.99
   4  -5   6   82.13    9.15
  -4  -5  -6   80.68    9.45
  -4  -5  -6   84.35    5.96
  -4  -5  -7  181.28    9.07
   4  -5   7  180.82   12.02
  -4  -5  -7  171.79    7.73
   4  -5   7  199.03   13.32
  -4  -5  -7  177.12    9.02
  -4  -5  -8   69.90    6.87
   4  -5   8   51.68    8.32
  -4  -5  -8   63.76    6.59
   4  -5   8   75.56   10.10
   4  -5   9   30.71    7.55
   4  -5   9   28.39    8.87
  -4  -5  -9   29.27    5.76
   4  -5  10  100.20   11.98
  -4  -5 -10   96.52    8.50
  -4  -4  14   81.11    6.10
  -4  -4  14   81.92   12.04
  -4  -4  13    5.23    3.49
  -4  -4  13   -3.57    8.20
  -4  -4  12  136.75    7.28
  -4  -4  12  153.92   11.04
  -4  -4  12  150.90   13.09
  -4  -4  11  157.25    7.64
  -4  -4  11  129.38   10.17
   4  -4 -11  138.56   10.83
  -4  -4  11  129.28   11.97
  -4  -4  10  173.49    8.01
   4  -4 -10  175.95    8.94
   4  -4 -10  172.67   11.04
  -4  -4  10  139.35   11.47
  -4  -4  10  163.02   10.67
   4  -4  -9 1291.10   31.56
  -4  -4   9 1359.17   31.33
   4  -4  -9 1267.25   35.53
  -4  -4   9 1284.68   36.27
   4  -4  -9 1319.83   34.22
  -4  -4   9 1319.12   34.57
   4  -4  -8  681.89   19.05
  -4  -4   8  692.92   19.25
   4  -4  -8  686.52   22.37
  -4  -4   8  709.98   23.01
   4  -4  -8  680.29   20.75
  -4  -4   8  739.51   22.22
   4  -4  -7   12.71    3.41
  -4  -4   7    7.08    3.47
   4  -4  -7    3.96    4.74
  -4  -4   7   14.08    5.21
   4  -4  -7   15.22    4.53
  -4  -4   7    8.31    5.00
   4  -4  -6   22.19    4.87
  -4  -4   6   25.36    4.29
   4  -4  -6   26.03    3.75
   4  -4  -6   27.74    4.06
  -4  -4   6   30.07    5.25
   4  -4  -6   29.48    4.18
  -4  -4   5  209.19   10.40
   4  -4  -5  218.91    9.47
   4  -4  -5  214.27    8.30
  -4  -4   5  222.07    9.74
   4  -4  -5  217.08    8.06
   4  -4  -5  224.68    7.56
  -4  -4   4  665.32   19.69
   4  -4  -4  661.85   18.11
  -4  -4   4  649.29   17.99
  -4  -4   4  636.95   16.27
   4  -4  -4  676.06   15.26
   4  -4  -4  669.22   15.88
   4  -4  -4  653.48   16.89
  -4  -4   3  136.30    7.99
  -4  -4   3  138.20    8.15
  -4  -4   3  148.11    6.83
   4  -4  -3  132.68    4.66
   4  -4  -3  145.16    4.96
  -4  -4   3  137.74    5.41
   4  -4  -2  454.08   12.28
  -4  -4   2  450.84   14.82
   4  -4  -2  449.87   10.98
  -4  -4   2  449.70   15.63
  -4  -4   2  450.15   11.34
   4  -4  -2  451.45   11.32
   4  -4  -1  347.45   10.15
  -4  -4   1  359.22   12.61
   4  -4  -1  366.19    9.99
   4  -4  -1  379.26   10.24
  -4  -4   1  360.25    9.76
  -4  -4   1  353.65   14.00
  -4  -4   0  599.32   19.67
   4  -4   0  598.57   14.73
  -4  -4   0  644.66   17.49
   4  -4   0  584.47   15.54
  -4  -4   0  620.72   15.58
   4  -4   1 2775.81   55.80
  -4  -4  -1 2805.03   58.49
  -4  -4  -1 2721.46   58.16
   4  -4   1 2802.57   58.53
  -4  -4  -1 2769.50   62.82
  -4  -4  -1 2813.18   53.99
  -4  -4  -2   43.39    6.29
   4  -4   2   37.88    2.80
  -4  -4  -2   44.11    4.50
  -4  -4  -2   45.78    2.59
  -4  -4  -2   45.01    2.59
  -4  -4  -2   46.03    2.60
   4  -4   2   36.69    4.97
  -4  -4  -2   52.90    5.02
   4  -4   3  416.28   14.69
  -4  -4  -3  406.62   10.90
  -4  -4  -3  395.51   16.17
   4  -4   3  426.83   10.08
  -4  -4  -3  425.15   11.13
   4  -4   3  391.46   14.63
  -4  -4  -3  400.72   14.51
   4  -4   4  124.66    8.46
  -4  -4  -4  125.85    5.87
  -4  -4  -4  127.20    6.17
  -4  -4  -4  126.11    8.64
   4  -4   4  141.81    9.18
  -4  -4  -5  125.59    6.51
   4  -4   5  118.38    8.96
  -4  -4  -5  145.82    7.39
   4  -4   5  125.95    9.56
  -4  -4  -5  139.18   10.01
  -4  -4  -6  567.98   16.84
   4  -4   6  609.40   20.57
   4  -4   6  570.51   21.37
  -4  -4  -6  595.32   21.55
  -4  -4  -6  559.51   17.11
  -4  -4  -7  107.16    7.52
   4  -4   7   91.73    9.04
  -4  -4  -7  109.33    5.82
   4  -4   7   93.63    9.79
  -4  -4  -7  105.18    7.77
  -4  -4  -8   44.78    6.15
   4  -4   8   47.58    7.34
   4  -4   8   39.72    8.45
  -4  -4  -8   33.86    5.97
  -4  -4  -8   30.70    3.79
   4  -4   9   31.38    8.51
  -4  -4  -9   28.89    6.39
   4  -4  10   68.22   11.24
  -4  -4 -10   60.44    8.03
  -4  -3  14   -0.73    8.51
  -4  -3  13   41.49    4.92
  -4  -3  13   51.44    9.93
  -4  -3  12   44.10    7.83
  -4  -3  12   35.64    4.44
  -4  -3  12   53.62    9.46
  -4  -3  11   70.42    8.54
  -4  -3  11   55.97    8.98
   4  -3 -11   62.56    8.43
  -4  -3  11   57.42    5.05
   4  -3 -11   65.50    6.18
  -4  -3  10 1468.32   37.26
   4  -3 -10 1429.65   37.56
  -4  -3  10 1360.38   39.14
   4  -3 -10 1444.73   34.50
  -4  -3  10 1446.55   33.25
  -4  -3  10 1466.36   41.88
[truncated: 359,745 more chars]
